# Supplementary material for: How the Structure of Per- and Polyfluoroalkyl Substances (PFAS) Influences Their Binding Potency to the Peroxisome Proliferator-Activated and Thyroid Hormone Receptors—An In Silico Screening Study
Source: MDPI journal article supplement (doi:10.3390/molecules28020479), 2023-01-04
Supplement: s1 [file s1]

| Model information       |                                                                                           |
|-------------------------|-------------------------------------------------------------------------------------------|
| Type of model           | MLR                                                                                       |
| Data split              | 3:1                                                                                       |
| Descriptors             | ICR,PW2                                                                                   |
| Descriptors correlation | 0.31                                                                                      |
| Preprocessing           | Standard scaler - Standardize features by removing the mean and scaling to unit variance. |
| Model equation          | PPARαBS=-7,499(±0,067) - 0,947(±0,07) x ICR - 0,394(±0,07) x PW2                          |

| Model statistics                              |       |
|-----------------------------------------------|-------|
| R <sup>2</sup>                                | 0.917 |
| RMSE <sub>C</sub>                             | 0.341 |
| MAE <sub>C</sub>                              | 0.288 |
| Q <sup>2</sup> <sub>LOO</sub>                 | 0.878 |
| R <sup>2</sup> -Q <sup>2</sup> <sub>LOO</sub> | 0.039 |
| RMSE <sub>CV</sub>                            | 0.350 |
| MAE <sub>CV</sub>                             | 0.244 |
| CCC <sub>CV</sub>                             | 0.932 |
| Q <sup>2</sup> <sub>F1</sub>                  | 0.897 |
| Q <sup>2</sup> <sub>F2</sub>                  | 0.897 |
| Q <sup>2</sup> <sub>F3</sub>                  | 0.912 |
| RMSE <sub>EXT</sub>                           | 0.352 |
| MAE <sub>EXT</sub>                            | 0.257 |
| CCC <sub>EXT</sub>                            | 0.937 |
| R <sup>2</sup> <sub>SCR</sub>                 | 0.070 |

|                   |       |
|-------------------|-------|
| MIN binding score | -8.79 |
| MAX binding score | -3.59 |
| HAT kryt.         | 0.31  |

| ID | NAME         | CAS         | SMILES                                                              | binding<br>score (calc.) | binding<br>score (expd.) | PW2  | ICR  | split (t/v) | AD (IN/OUT) |
|----|--------------|-------------|---------------------------------------------------------------------|--------------------------|--------------------------|------|------|-------------|-------------|
| 1  | 10:2FTOH     | 865-86-1    | C(CO)C(C(C(C(C(C(C(C(F)(F)F)(F)F)(F)F)(F)F)(F)F)(F)F)(F)F)(F)F      | -8.4                     | -8.62                    | 0.68 | 2.73 | T           | IN          |
| 2  | 10:2FTUCA    | 70887-94-4  | C(=C(C(C(C(C(C(C(C(C(F)(F)F)(F)F)(F)F)(F)F)(F)F)(F)F)(F)F)C(=O)O    | -9.1                     | -8.39                    | 0.67 | 2.74 | T           | IN          |
| 3  | 4:2diPAPs    | 135098-69-0 | C(COP(=O)(O)OCCC(C(C(C(F)(F)F)(F)F)(F)F)C(C(C(C(F)(F)F)(F)F)(F)F)   | -9                       | -8.58                    | 0.66 | 2.96 | T           | IN          |
| 4  | 4:2FTOH      | 2043-47-2   | C(CO)C(C(C(C(F)(F)F)(F)F)(F)F                                       | -6.2                     | -6.21                    | 0.65 | 1.91 | T           | IN          |
| 5  | 4:2FTS       | 757124-72-4 | C(CS(=O)(=O)O)C(C(C(C(F)(F)F)(F)F)(F)F                              | -6.6                     | -7.24                    | 0.67 | 2.17 | T           | IN          |
| 6  | 5:3FTCA      | 914637-49-3 | C(CC(C(C(C(C(F)(F)F)(F)F)(F)F)(F)F)C(=O)O                           | -7.1                     | -7.13                    | 0.66 | 2.24 | V           | IN          |
| 7  | 6:2 Cl-PFESA | 756426-58-1 | C(C(C(C(F)(F)Cl)(F)F)(F)F)(C(C(OC(C(F)S(=O)(=O)O)(F)F)(F)F)(F)F     | -8.5                     | -8.43                    | 0.69 | 2.51 | T           | IN          |
| 8  | 6:2FTOH      | 647-42-7    | C(CO)C(C(C(C(C(F)(F)F)(F)F)(F)F)(F)F)(F)F                           | -7.2                     | -7.11                    | 0.66 | 2.23 | V           | IN          |
| 9  | 6:2FTS       | 27619-97-2  | C(CS(=O)(=O)O)C(C(C(C(C(F)(F)F)(F)F)(F)F)(F)F)(F)F                  | -7.5                     | -7.78                    | 0.67 | 2.44 | T           | IN          |
| 10 | 6:2FTUCA     | 70887-88-6  | C(=C(C(C(C(C(C(F)(F)F)(F)F)(F)F)(F)F)C(=O)O                         | -7.4                     | -7.13                    | 0.66 | 2.24 | V           | IN          |
| 11 | 6:2PAPs      | 57678-01-0  | C(COP(=O)(O)O)C(C(C(C(C(C(F)(F)F)(F)F)(F)F)(F)F)(F)F                | -7.6                     | -7.92                    | 0.67 | 2.51 | V           | IN          |
| 12 | 8:2FTOH      | 678-39-7    | C(CO)C(C(C(C(C(C(C(F)F)(F)F)(F)F)(F)F)(F)F)(F)F)(F)F                | -8.3                     | -7.90                    | 0.67 | 2.50 | T           | IN          |
| 13 | 8:2FTS       | 39108-34-4  | C(CS(=O)(=O)O)C(C(C(C(C(C(C(F)F)(F)F)(F)F)(F)F)(F)F)(F)F)(F)F       | -8.5                     | -8.52                    | 0.68 | 2.68 | V           | IN          |
| 14 | 8:2FTUCA     | 70887-84-2  | C(=C(C(C(C(C(C(C(C(F)F)(F)F)(F)F)(F)F)(F)F)(F)F)C(=O)O              | -8.2                     | -7.92                    | 0.67 | 2.51 | T           | IN          |
| 15 | EtFOSA       | 4151-50-2   | CCNS(=O)(=O)C(C(C(C(C(C(C(F)F)(F)F)(F)F)(F)F)(F)F)(F)F)(F)F         | -8.6                     | -8.27                    | 0.67 | 2.68 | T           | IN          |
| 16 | EtFOSE       | 1691-99-2   | CCN(CCO)S(=O)(=O)C(C(C(C(C(C(C(F)F)(F)F)(F)F)(F)F)(F)F)(F)F)(F)F    | -7.9                     | -8.14                    | 0.66 | 2.74 | V           | IN          |
| 17 | FOSA         | 754-91-6    | C(C(C(C(C(F)F)S(=O)(=O)N)(F)F)(F)F)(C(C(C(F)F)(F)F)(F)F)(F)F        | -8.3                     | -8.28                    | 0.69 | 2.44 | V           | IN          |
| 18 | MeFOSA       | 31506-32-8  | CNS(=O)(=O)C(C(C(C(C(C(C(F)F)(F)F)(F)F)(F)F)(F)F)(F)F)(F)F          | -8.4                     | -8.17                    | 0.68 | 2.51 | T           | IN          |
| 19 | MeFOSE       | 24448-09-7  | CN(CCO)S(=O)(=O)C(C(C(C(C(C(C(F)F)(F)F)(F)F)(F)F)(F)F)(F)F)(F)F     | -7.8                     | -8.39                    | 0.67 | 2.74 | T           | IN          |
| 20 | Mhopflca n=6 | -           | C(C(=O)O)OCC(C(C(C(C(C(C(F)F)(F)F)(F)F)(F)F)(F)F)(F)F)(F)F          | -7.4                     | -7.69                    | 0.66 | 2.52 | T           | IN          |
| 21 | Mhopflca n=7 | -           | C(C(=O)O)OCC(C(C(C(C(C(C(F)F)(F)F)(F)F)(F)F)(F)F)(F)F)(F)F          | -7.7                     | -8.06                    | 0.66 | 2.70 | T           | IN          |
| 22 | Mhopflca n=8 | -           | C(C(=O)O)OCC(C(C(C(C(C(C(F)F)(F)F)(F)F)(F)F)(F)F)(F)F)(F)F          | -8.2                     | -8.39                    | 0.67 | 2.74 | V           | IN          |
| 23 | PFBA         | 375-22-4    | C(=O)(C(C(C(F)F)(F)F)(F)F)O                                         | -5.6                     | -5.81                    | 0.67 | 1.46 | T           | IN          |
| 24 | PFBS         | 375-73-5    | C(C(C(F)F)S(=O)(=O)O)(F)F)(C(F)F)(F)F                               | -6.3                     | -6.97                    | 0.69 | 1.79 | V           | IN          |
| 25 | PFCHS        | 2106-55-0   | C1(C(C(C(C1(F)F)(F)F)S(=O)(=O)O)(F)F)(F)F)(F)F                      | -7.2                     | -6.58                    | 0.70 | 1.47 | T           | IN          |
| 26 | PFDA         | 335-76-2    | C(=O)(C(C(C(C(C(C(C(F)F)(F)F)(F)F)(F)F)(F)F)(F)F)(F)F)O             | -8.5                     | -8.43                    | 0.69 | 2.51 | T           | IN          |
| 27 | PFETs        | 354-88-1    | C(C(F)F)S(=O)(=O)O)(F)F                                             | -4.9                     | -5.77                    | 0.68 | 1.32 | V           | IN          |
| 28 | PFHpA        | 375-85-9    | C(=O)(C(C(C(C(C(F)F)(F)F)(F)F)(F)F)(F)F)(F)F)O                      | -7.5                     | -7.47                    | 0.68 | 2.16 | T           | IN          |
| 29 | PFHpS        | 375-92-8    | C(C(C(C(F)F)(F)F)(F)F)(C(C(C(F)F)S(=O)(=O)O)(F)F)(F)F               | -8                       | -7.88                    | 0.69 | 2.24 | T           | IN          |
| 30 | PFHxA        | 307-24-4    | C(=O)(C(C(C(C(C(F)F)(F)F)(F)F)(F)F)(F)F)O                           | -7.1                     | -6.94                    | 0.68 | 1.90 | T           | IN          |
| 31 | PFHxPA       | 40143-76-8  | C(C(C(C(F)F)P(=O)(O)O)(F)F)(F)F)(C(C(C(F)F)(F)F)(F)F                | -7.9                     | -7.70                    | 0.69 | 2.15 | T           | IN          |
| 32 | PFHxS        | 355-46-4    | C(C(C(C(F)F)S(=O)(=O)O)(F)F)(F)F)(C(C(F)F)(F)F)(F)F                 | -7.2                     | -7.70                    | 0.69 | 2.15 | T           | IN          |
| 33 | PFNA         | 375-95-1    | C(=O)(C(C(C(C(C(C(C(F)F)(F)F)(F)F)(F)F)(F)F)(F)F)(F)F)O             | -8                       | -8.05                    | 0.68 | 2.45 | V           | IN          |
| 34 | PFNS         | 68259-12-1  | C(C(C(C(C(F)F)(F)F)(F)F)(F)F)(C(C(C(C(F)F)S(=O)(=O)O)(F)F)(F)F)(F)F | -8.7                     | -8.43                    | 0.69 | 2.51 | V           | IN          |
| 35 | PFOA         | 335-67-1    | C(=O)(C(C(C(C(C(C(C(F)F)(F)F)(F)F)(F)F)(F)F)(F)F)(F)F)O             | -7.9                     | -7.63                    | 0.68 | 2.24 | T           | IN          |
| 36 | PFOPA        | 40143-78-0  | C(C(C(C(C(F)F)P(=O)(O)O)(F)F)(F)F)(C(C(C(F)F)(F)F)(F)F)(F)F         | -8.5                     | -8.28                    | 0.69 | 2.44 | V           | IN          |
| 37 | PFOS         | 1763-23-1   | C(C(C(C(C(F)F)S(=O)(=O)O)(F)F)(F)F)(C(C(C(F)F)(F)F)(F)F)(F)F        | -8.2                     | -8.28                    | 0.69 | 2.44 | T           | IN          |
| 38 | PFPeA        | 2706-90-3   | C(=O)(C(C(C(C(F)F)(F)F)(F)F)(F)F)O                                  | -6.1                     | -6.51                    | 0.67 | 1.81 | T           | IN          |
| 39 | PFPeS        | 2706-91-4   | C(C(C(F)F)(F)F)(F)F)(C(C(C(F)F)S(=O)(=O)O)(F)F)(F)F                 | -6.9                     | -7.20                    | 0.69 | 1.90 | T           | IN          |
| 40 | PFPPrA       | 422-64-0    | C(=O)(C(C(F)F)(F)F)O                                                | -4.9                     | -5.35                    | 0.66 | 1.36 | T           | IN          |
| 41 | PFPPrS       | 110676-15-8 | C(C(F)F)(F)F)(C(F)F)S(=O)(=O)O)(F)F                                 | -5.7                     | -6.04                    | 0.68 | 1.45 | V           | IN          |
| 42 | PFUdA        | 2058-94-8   | C(=O)(C(C(C(C(C(C(C(C(C(F)F)(F)F)(F)F)(F)F)(F)F)(F)F)(F)F)O         | -8.7                     | -8.79                    | 0.69 | 2.69 | T           | IN          |
| 43 | TFA          | 76-05-1     | C(=O)(C(F)F)O                                                       | -4.1                     | -3.59                    | 0.63 | 0.86 | T           | OUT         |







[illegible]









|         |                                                                                                                  |             |                                                                                                                           |       |      |      |   |     |
|---------|------------------------------------------------------------------------------------------------------------------|-------------|---------------------------------------------------------------------------------------------------------------------------|-------|------|------|---|-----|
| QL00160 | Perfluoro-2-(3-methoxypropoxy)propanoic acid potassium salt                                                      | 496805-64-2 | [K+].[O-]C(=O)C(F)(OC(F)(F)C(F)(F)C(F)(F)C(F)(F)C(F)(F)F                                                                  | -6.66 | 0.64 | 2.34 | P | IN  |
| QL00161 | Potassium 2,3,3,3-tetrafluoro-2-[1,1,2,3,3,3-hexafluoro-2-(heptafluoropropoxy)propoxy]propionate                 | 67118-57-4  | [K+].[O-]C(=O)C(F)(OC(F)(F)C(F)(F)C(F)(F)C(F)(F)C(F)(F)C(F)(F)F                                                           | -7.44 | 0.65 | 2.53 | P | IN  |
| QL00162 | Potassium 2,3,4,5-tetrachloro-6-[[[3-[[[heptadecafluorooctyl)sulphonyl]oxy]phenyl]amino]carbonyl]benzoate        | 57589-85-2  | [K+].[O-]C(=O)c1c(Cl)c(Cl)c(Cl)c(Cl)c1C(=O)Nc2cccc(OS(=O)(=O)C(F)(F)C(F)(F)C(F)(F)C(F)(F)C(F)(F)C(F)(F)C(F)(F)C(F)(F)F)c2 | -8.83 | 0.64 | 3.40 | P | OUT |
| QL00163 | Potassium 2,3,4,5-tetrachloro-6-[[[3-[[[pentadecafluoroheptyl)sulphonyl]oxy]phenyl]amino]carbonyl]benzoate       | 68541-01-5  | [K+].[O-]C(=O)c1c(Cl)c(Cl)c(Cl)c(Cl)c1C(=O)Nc2cccc(OS(=O)(=O)C(F)(F)C(F)(F)C(F)(F)C(F)(F)C(F)(F)C(F)(F)C(F)(F)C(F)(F)F)c2 | -8.56 | 0.64 | 3.31 | P | OUT |
| QL00164 | Potassium 2,3,4,5-tetrachloro-6-[[[3-[[[tridecafluoroheptyl)sulphonyl]oxy]phenyl]amino]carbonyl]benzoate         | 68815-72-5  | [K+].[O-]C(=O)c1c(Cl)c(Cl)c(Cl)c(Cl)c1C(=O)Nc2cccc(OS(=O)(=O)C(F)(F)C(F)(F)C(F)(F)C(F)(F)C(F)(F)C(F)(F)C(F)(F)F)c2        | -8.35 | 0.63 | 3.26 | P | OUT |
| QL00165 | Potassium 2,3,4,5-tetrachloro-6-[[[3-[[[undecafluoropentyl)sulphonyl]oxy]phenyl]amino]carbonyl]benzoate          | 68541-02-6  | [K+].[O-]C(=O)c1c(Cl)c(Cl)c(Cl)c(Cl)c1C(=O)Nc2cccc(OS(=O)(=O)C(F)(F)C(F)(F)C(F)(F)C(F)(F)C(F)(F)C(F)(F)F)c2               | -8.02 | 0.63 | 3.16 | P | OUT |
| QL00166 | Potassium 2,3,4,5-tetrachloro-6-[[[3-[[[nonafluorobutyl)sulphonyl]oxy]phenyl]amino]carbonyl]benzoate             | 68568-54-7  | [K+].[O-]C(=O)c1c(Cl)c(Cl)c(Cl)c(Cl)c1C(=O)Nc2cccc(OS(=O)(=O)C(F)(F)C(F)(F)C(F)(F)C(F)(F)C(F)(F)F)c2                      | -7.72 | 0.62 | 3.08 | P | OUT |
| QL00167 | Potassium 4,4,5,5,6,6,7,7,8,8,9,9,10,10,11,11,11-heptadecafluoroundecanoate                                      | 83310-58-1  | [K+].[O-]C(=O)CCC(F)(F)C(F)(F)C(F)(F)C(F)(F)C(F)(F)C(F)(F)C(F)(F)C(F)(F)F                                                 | -7.91 | 0.65 | 2.80 | P | IN  |
| QL00168 | Potassium [(1,1,2,2,3,3,4,4,5,5,6,6,7,7,8,8,8-heptadecafluorooctane-1-sulfonyl)amino]acetate                     | 75260-69-4  | [K+].[O-]C(=O)CNS(=O)(=O)C(F)(F)C(F)(F)C(F)(F)C(F)(F)C(F)(F)C(F)(F)C(F)(F)C(F)(F)F                                        | -8.12 | 0.65 | 2.85 | P | IN  |
| QL00169 | Potassium 1,1,2,3,3-hexafluoro-2-(trifluoromethyl)propanesulphonate                                              | 93762-10-8  | [K+].[O-]S(=O)(=O)C(F)(F)C(F)(F)C(F)(F)C(F)(F)F                                                                           | -5.41 | 0.64 | 1.61 | P | IN  |
| QL00170 | Potassium 1,1,2,2,3,3,4,4,5,5,6,6,7,7,8,8,9,9,10,10,11,11,12,12-pentacosafuorododecane-1-sulphonate              | 85187-17-3  | [K+].[O-]S(=O)(=O)C(F)(F)C(F)(F)C(F)(F)C(F)(F)C(F)(F)C(F)(F)C(F)(F)C(F)(F)C(F)(F)C(F)(F)C(F)(F)C(F)(F)C(F)(F)F            | -9.04 | 0.68 | 2.99 | P | OUT |
| QL00171 | Potassium henicosafuorodecanesulphonate                                                                          | 2806-16-8   | [K+].[O-]S(=O)(=O)C(F)(F)C(F)(F)C(F)(F)C(F)(F)C(F)(F)C(F)(F)C(F)(F)C(F)(F)C(F)(F)C(F)(F)C(F)(F)F                          | -8.56 | 0.67 | 2.79 | P | IN  |
| QL00172 | Perfluorononananesulphonate potassium                                                                            | 29359-39-5  | [K+].[O-]S(=O)(=O)C(F)(F)C(F)(F)C(F)(F)C(F)(F)C(F)(F)C(F)(F)C(F)(F)C(F)(F)C(F)(F)F                                        | -8.19 | 0.67 | 2.63 | P | IN  |
| QL00173 | Potassium heptadecafluorooctane-1-sulphonate                                                                     | 2795-39-3   | [K+].[O-]S(=O)(=O)C(F)(F)C(F)(F)C(F)(F)C(F)(F)C(F)(F)C(F)(F)C(F)(F)C(F)(F)C(F)(F)F                                        | -7.99 | 0.67 | 2.57 | P | IN  |
| QL00174 | Potassium 1,1,2,2,3,3,4,4,5,5,6,6,7,7,7-pentadecafluoroheptane-1-sulphonate                                      | 60270-55-5  | [K+].[O-]S(=O)(=O)C(F)(F)C(F)(F)C(F)(F)C(F)(F)C(F)(F)C(F)(F)C(F)(F)C(F)(F)F                                               | -7.52 | 0.67 | 2.38 | P | IN  |
| QL00175 | PFHS-K                                                                                                           | 3871-99-6   | [K+].[O-]S(=O)(=O)C(F)(F)C(F)(F)C(F)(F)C(F)(F)C(F)(F)C(F)(F)F                                                             | -7.26 | 0.66 | 2.31 | P | IN  |
| QL00176 | Potassium perfluoropentanesulphonate                                                                             | 3872-25-1   | [K+].[O-]S(=O)(=O)C(F)(F)C(F)(F)C(F)(F)C(F)(F)C(F)(F)F                                                                    | -6.66 | 0.66 | 2.08 | P | IN  |
| QL00177 | Potassium 1,1,2,2,3,3,4,4,4-nonafluorobutane-1-sulphonate                                                        | 29420-49-3  | [K+].[O-]S(=O)(=O)C(F)(F)C(F)(F)C(F)(F)C(F)(F)F                                                                           | -6.29 | 0.65 | 2.00 | P | IN  |
| QL00178 | Potassium 1,1,2,2,3,3,4,4-octafluorobutane-1-sulphonate                                                          | 70259-85-7  | [K+].[O-]S(=O)(=O)C(F)(F)C(F)(F)C(F)(F)C(F)(F)F                                                                           | -5.94 | 0.63 | 2.02 | P | IN  |
| QL00179 | Potassium 1,1,2,2-tetrafluoro-2-[[[1,1,2,3,3-hexafluoro-3-(pentafluoroethoxy)propan-2-yl]oxy]ethane-1-sulphonate | 70755-50-9  | [K+].[O-]S(=O)(=O)C(F)(F)C(F)(F)OC(F)(F)C(F)(F)C(F)(F)OC(F)(F)C(F)(F)F                                                    | -7.61 | 0.66 | 2.56 | P | IN  |
| QL00180 | Potassium 9-chlorohexadecafluoro-3-oxanonane-1-sulfonate                                                         | 73606-19-6  | [K+].[O-]S(=O)(=O)C(F)(F)C(F)(F)OC(F)(F)C(F)(F)C(F)(F)C(F)(F)C(F)(F)C(F)(F)C(F)(F)Cl                                      | -7.99 | 0.66 | 2.63 | P | IN  |
| QL00181 | Perfluoro-2-(hexyloxy)ethane-1-sulfonic acid potassium salt                                                      | 68136-88-9  | [K+].[O-]S(=O)(=O)C(F)(F)C(F)(F)OC(F)(F)C(F)(F)C(F)(F)C(F)(F)C(F)(F)C(F)(F)F                                              | -7.99 | 0.66 | 2.63 | P | IN  |
| QL00182 | Potassium 1,1,2,2-tetrafluoro-2-(pentafluoroethoxy)ethane-1-sulfonate                                            | 117205-07-9 | [K+].[O-]S(=O)(=O)C(F)(F)C(F)(F)OC(F)(F)C(F)(F)F                                                                          | -6.32 | 0.64 | 2.09 | P | IN  |
| QL00183 | Cyclohexanesulfonic acid, decafluoro(trifluoromethyl)-, potassium salt (11)                                      | 68156-07-0  | [K+].[O-]S(=O)(=O)C1(C(F)(F)C(F)(F)C(F)(F)C(F)(F)C(F)(F)C1(F)F                                                            | -6.16 | 0.66 | 1.70 | P | IN  |
| QL00184 | Potassium 1,2,2,3,3,4,5,5,6,6-decafluoro-4-(pentafluoroethyl)cyclohexanesulphonate                               | 335-24-0    | [K+].[O-]S(=O)(=O)C1(C(F)(F)C(F)(F)C(F)(F)C(F)(F)C(F)(F)C1(F)F                                                            | -7.60 | 0.67 | 2.36 | P | IN  |
| QL00185 | Potassium undecafluorocyclohexanesulphonate                                                                      | 3107-18-4   | [K+].[O-]S(=O)(=O)C1(C(F)(F)C(F)(F)C(F)(F)C(F)(F)C1(F)F                                                                   | -6.12 | 0.66 | 1.67 | P | IN  |

|         |                                                                                             |              |                                                                                                                                               |       |      |      |   |     |
|---------|---------------------------------------------------------------------------------------------|--------------|-----------------------------------------------------------------------------------------------------------------------------------------------|-------|------|------|---|-----|
| QL00186 | Potassium 3,3,4,4,5,5,6,6,7,7,8,8,8-tridecafluorooctanesulphonate                           | 59587-38-1   | [K+].[O-]S(=O)(=O)CCCC(F)(F)C(F)(F)C(F)(F)C(F)(F)C(F)(F)F                                                                                     | -7.46 | 0.65 | 2.58 | P | IN  |
| QL00187 | Potassium 5,5,6,6,7,7,8,8,8-nonafluorooctane-1-sulfonate                                    | 1604816-60-5 | [K+].[O-]S(=O)(=O)CCCCC(F)(F)C(F)(F)C(F)(F)C(F)(F)F                                                                                           | -6.68 | 0.62 | 2.57 | P | OUT |
| QL00188 | Potassium 3,3,4,4,5,5,6,6,7,7,8,8,9,9,10,10,11,11,12,12-henicosfluorododecyl sulfate        | 1262446-14-9 | [K+].[O-]S(=O)(=O)OCCCC(F)(F)C(F)(F)C(F)(F)C(F)(F)C(F)(F)C(F)(F)C(F)(F)C(F)(F)C(F)(F)F                                                        | -8.66 | 0.66 | 3.03 | P | IN  |
| QL00189 | Potassium 3,3,4,4,5,5,6,6,7,7,8,8,9,9,10,10-heptadecafluorodecyl sulfate                    | 1262446-13-8 | [K+].[O-]S(=O)(=O)OCCCC(F)(F)C(F)(F)C(F)(F)C(F)(F)C(F)(F)C(F)(F)C(F)(F)F                                                                      | -8.11 | 0.65 | 2.85 | P | IN  |
| QL00190 | 3-[(Perfluorooctane-1-sulfonyl)amino]-N,N-dimethylpropan-1-amine N-oxide potassium salt     | 178094-69-4  | [K+].C[N+](C)([O-])CCCC[N-]S(=O)(=O)C(F)(F)C(F)(F)C(F)(F)C(F)(F)C(F)(F)C(F)(F)C(F)(F)F                                                        | -8.46 | 0.65 | 3.03 | P | IN  |
| QL00191 | 3-[(Perfluoroheptane-1-sulfonyl)amino]-N,N-dimethylpropan-1-amine N-oxide potassium salt    | 178094-70-7  | [K+].C[N+](C)([O-])CCCC[N-]S(=O)(=O)C(F)(F)C(F)(F)C(F)(F)C(F)(F)C(F)(F)C(F)(F)F                                                               | -8.28 | 0.65 | 3.00 | P | IN  |
| QL00192 | 3-[(Perfluorohexane-1-sulfonyl)amino]-N,N-dimethylpropan-1-amine N-oxide potassium salt     | 178094-71-8  | [K+].C[N+](C)([O-])CCCC[N-]S(=O)(=O)C(F)(F)C(F)(F)C(F)(F)C(F)(F)C(F)(F)C(F)(F)F                                                               | -7.86 | 0.64 | 2.86 | P | IN  |
| QL00193 | 3-[(Perfluoropentane-1-sulfonyl)amino]-N,N-dimethylpropan-1-amine N-oxide potassium salt    | 178094-72-9  | [K+].C[N+](C)([O-])CCCC[N-]S(=O)(=O)C(F)(F)C(F)(F)C(F)(F)C(F)(F)C(F)(F)F                                                                      | -7.64 | 0.64 | 2.82 | P | OUT |
| QL00194 | 3-[(Perfluorobutane-1-sulfonyl)amino]-N,N-dimethylpropan-1-amine N-oxide potassium salt     | 178094-73-0  | [K+].C[N+](C)([O-])CCCC[N-]S(=O)(=O)C(F)(F)C(F)(F)C(F)(F)C(F)(F)F                                                                             | -7.12 | 0.63 | 2.66 | P | OUT |
| QL00195 | Cyclohexanesulfonic acid, decafluoro(pentafluoroethyl)-, potassium salt (TSCA, DSL, AICS)   | 67584-42-3   | [K+].C1(C(C(C(C1(F)(F)F)(F)(F)F)(F)(F)F)(F)(F)F)(S(=O)(=O)[O-])C(C(F)(F)F)(F)F                                                                | -6.87 | 0.67 | 2.01 | P | IN  |
| QL00196 | Potassium N-propyl-N-((tridecafluorohexyl)sulphonyl)glycinate                               | 85665-66-3   | [K+].CCCN(CC([O-])=O)S(=O)(=O)C(F)(F)C(F)(F)C(F)(F)C(F)(F)C(F)(F)C(F)(F)F                                                                     | -7.07 | 0.63 | 2.64 | P | OUT |
| QL00197 | Potassium N-[(heptadecafluoroethyl)sulphonyl]-N-propylglycinate                             | 55910-10-6   | [K+].CCCN(CC(=O)[O-])S(=O)(=O)C(F)(F)C(F)(F)C(F)(F)C(F)(F)C(F)(F)C(F)(F)C(F)(F)F                                                              | -7.79 | 0.64 | 2.85 | P | OUT |
| QL00198 | Potassium N-ethyl-N-[(heptadecafluoroethyl)sulphonyl]glycinate                              | 2991-51-7    | [K+].CCN(CC(=O)[O-])S(=O)(=O)C(F)(F)C(F)(F)C(F)(F)C(F)(F)C(F)(F)C(F)(F)C(F)(F)F                                                               | -7.96 | 0.65 | 2.85 | P | IN  |
| QL00199 | Potassium N-ethyl-N-[(pentadecafluoroheptyl)sulphonyl]glycinate                             | 67584-62-7   | [K+].CCN(CC(=O)[O-])S(=O)(=O)C(F)(F)C(F)(F)C(F)(F)C(F)(F)C(F)(F)C(F)(F)F                                                                      | -7.73 | 0.64 | 2.81 | P | IN  |
| QL00200 | Potassium N-ethyl-N-[(tridecafluorohexyl)sulphonyl]glycinate                                | 67584-53-6   | [K+].CCN(CC(=O)[O-])S(=O)(=O)C(F)(F)C(F)(F)C(F)(F)C(F)(F)C(F)(F)C(F)(F)F                                                                      | -7.26 | 0.64 | 2.65 | P | OUT |
| QL00201 | Potassium N-ethyl-N-[(undecafluoropentyl)sulphonyl]glycinate                                | 67584-52-5   | [K+].CCN(CC(=O)[O-])S(=O)(=O)C(F)(F)C(F)(F)C(F)(F)C(F)(F)C(F)(F)F                                                                             | -6.97 | 0.63 | 2.59 | P | OUT |
| QL00202 | Potassium N-ethyl-N-[(nonafluorobutyl)sulphonyl]glycinate                                   | 67584-51-4   | [K+].CCN(CC(=O)[O-])S(=O)(=O)C(F)(F)C(F)(F)C(F)(F)C(F)(F)F                                                                                    | -6.35 | 0.62 | 2.40 | P | OUT |
| QL00203 | 1-[2-[Ethyl[(perfluoroethyl)sulfonyl]amino]ethyl]butanedioate potassium                     | 92340-26-6   | [K+].CCN(CCOC(=O)CCC([O-])=O)S(=O)(=O)C(F)(F)C(F)(F)C(F)(F)C(F)(F)C(F)(F)C(F)(F)C(F)(F)F                                                      | -8.51 | 0.63 | 3.33 | P | OUT |
| QL00204 | Potassium N-[(heptadecafluoroethyl)sulphonyl]-N-methylglycinate                             | 70281-93-5   | [K+].CN(CC(=O)[O-])S(=O)(=O)C(F)(F)C(F)(F)C(F)(F)C(F)(F)C(F)(F)C(F)(F)C(F)(F)F                                                                | -8.16 | 0.65 | 2.85 | P | IN  |
| QL00205 | Potassium N-((perfluoro-7-methyloctyl)-2-hydroxypropyl)-N-methylaminoacetate                | 94159-89-4   | [K+].CN(CC(O)CC(F)(F)C(F)(F)C(F)(F)C(F)(F)C(F)(F)C(F)(F)C(F)(F)C(F)(F)CC([O-])=O                                                              | -8.13 | 0.64 | 3.01 | P | OUT |
| QL00206 | Potassium N-((perfluoroethyl)-2-hydroxypropyl)-N-methylglycinate                            | 94159-87-2   | [K+].CN(CC(O)CC(F)(F)C(F)(F)C(F)(F)C(F)(F)C(F)(F)C(F)(F)C(F)(F)C(F)(F)CC([O-])=O                                                              | -8.14 | 0.64 | 3.05 | P | OUT |
| QL00207 | Potassium bis(perfluorohexyl)difluoroborate                                                 | 937038-66-9  | [K+].F[B-](F)(C(F)(F)C(F)(F)C(F)(F)C(F)(F)C(F)(F)C(F)(F)C(F)(F)C(F)(F)C(F)(F)C(F)(F)F                                                         | -9.04 | 0.68 | 2.99 | P | OUT |
| QL00208 | Potassium N,N-Bis(perfluorobutanesulfonyl)amide                                             | 129135-87-1  | [K+].FC(F)(F)C(F)(F)C(F)(F)C(F)(F)S(=O)(=O)[N-]S(=O)(=O)C(F)(F)C(F)(F)C(F)(F)C(F)(F)F                                                         | -8.31 | 0.67 | 2.75 | P | IN  |
| QL00209 | Potassium 4,4,5,5,6,6-hexafluoro-1,1,3,3-tetraoxo-1lambda~6~,3lambda~6~,2-dithiazinan-2-ide | 588668-97-7  | [K+].FC1(F)C(F)(F)S(=O)(=O)[N-]S(=O)(=O)C1(F)F                                                                                                | -5.42 | 0.65 | 1.52 | P | IN  |
| QL00210 | Potassium decafluoro(pentafluoroethyl)cyclohexanesulphonate                                 | 67584-42-3   | [K+].O=S(=O)([O-])C1(F)C(F)(F)C(F)(F)C(F)(F)C(F)(F)C1(F)C(F)(F)C(F)(F)F                                                                       | -6.90 | 0.67 | 2.01 | P | IN  |
| QL00211 | Lanthanum, tris(6,6,7,7,8,8,8-heptafluoro-2,2-dimethyl-3,5-octanedionato-BO3,BO5)-          | 19106-89-9   | [La+3].CC(C)(C)C([O-])=CC(=O)C(F)(F)C(F)(F)C(F)(F)F.CC(C)(C)C([O-])=CC(=O)C(F)(F)C(F)(F)C(F)(F)F.CC(C)(C)C([O-])=CC(=O)C(F)(F)C(F)(F)C(F)(F)F | -6.81 | 0.65 | 2.24 | P | IN  |



[illegible]



[illegible]









|         |                                                                                                      |              |                                                                                                                                                      |
|---------|------------------------------------------------------------------------------------------------------|--------------|------------------------------------------------------------------------------------------------------------------------------------------------------|
| QL00370 | Ammonium N,N-bis(perfluorobutanesulfonyl)amide                                                       | 129318-48-5  | [NH4+].FC(F)(F)C(F)(F)C(F)(F)C(F)(F)S(=O)(=O)[N-]S(=O)(=O)C(F)(F)C(F)(F)C(F)(F)C(F)(F)F                                                              |
| QL00371 | 2-Hydroxy-3-[(2-hydroxyethyl)[(nonafluorobutyl)sulfonyl]amino]propanesulfonic acid monoammonium salt | 484023-82-7  | [NH4+].OCCN(CC(O)CS([O-])(=O)=O)S(=O)(=O)C(F)(F)C(F)(F)C(F)(F)C(F)(F)F                                                                               |
| QL00372 | 3,3,4,4,5,5,6,6,6-nonafluoro-1-nitrohex-1-ene                                                        | 306935-66-0  | [O-][N+](=O)C=CC(F)(F)C(F)(F)C(F)(F)F                                                                                                                |
| QL00373 | 1H,2H,2H-perfluorooctanal (2,4-dinitrophenyl)hydrazone                                               | 128917-19-1  | [O-][N+](=O)C1=CC(=C(NN=CC(F)(F)C(F)(F)C(F)(F)C(F)(F)C(F)(F)C(F)(F)C=C1)[N+]]([O-])=O                                                                |
| QL00374 | 1-(1,1,1,2,3,3,3-Heptafluoropropan-2-yl)-3,5-dinitrobenzene                                          | 24813-57-8   | [O-][N+](=O)C1=CC(=CC(=C1)[N+]]([O-])=O)C(F)(C(F)(F)C(F)(F)F                                                                                         |
| QL00375 | Butanamide, N-(2-bromo-4-nitrophenyl)-2,2,3,3,4,4,4-heptafluoro-                                     | 111189-67-4  | [O-][N+](=O)C1=CC(Br)=C(NC(=O)C(F)(F)C(F)(F)C(F)(F)F)C=C1                                                                                            |
| QL00376 | 3-Nitrophenyl heptafluorobutanoate                                                                   | 52512-15-9   | [O-][N+](=O)C1=CC(OC(=O)C(F)(F)C(F)(F)C(F)(F)F)=CC=C1                                                                                                |
| QL00377 | N-(4-Nitrophenyl)perfluorobutanamide                                                                 | 3869-06-5    | [O-][N+](=O)C1=CC=C(NC(=O)C(F)(F)C(F)(F)C(F)(F)F)C=C1                                                                                                |
| QL00378 | 4-Nitrophenyl heptafluorobutanoate                                                                   | 1799-92-4    | [O-][N+](=O)C1=CC=C(OC(=O)C(F)(F)C(F)(F)C(F)(F)F)C=C1                                                                                                |
| QL00379 | 6-Nitro-2-(pentafluoroethyl)-1H-benzimidazole                                                        | 4229-01-0    | [O-][N+](=O)C1=CC2=C(C=C1)N=C(N2)C(F)(F)C(F)(F)F                                                                                                     |
| QL00380 | 1,2,4-Trifluoro-3,5-bis(1,1,1,2,3,3,3-heptafluoropropan-2-yl)-6-nitrobenzene                         | 20017-51-0   | [O-][N+](=O)c1c(F)c(F)c(F)c1C(F)(C(F)(F)F)C(F)(F)C(F)(C(F)(F)F)C(F)(F)F                                                                              |
| QL00381 | 1,2,4,5-Tetrafluoro-3-(1,1,1,2,3,3,3-heptafluoropropan-2-yl)-6-nitrobenzene                          | 20017-50-9   | [O-][N+](=O)c1c(F)c(F)c(F)c1F)C(F)(C(F)(F)F)C(F)(F)F                                                                                                 |
| QL00382 | 1,4-Dichloro-2-(1,1,2,3,3,3-hexafluoropropoxy)-5-nitrobenzene                                        | 130841-23-5  | [O-][N+](=O)c1cc(Cl)c(OC(F)(F)C(F)C(F)(F)F)cc1Cl                                                                                                     |
| QL00383 | 2,2,3,3,4,4,5,5,5-Nonafluoropentyl 2,5,7-trinitro-9-oxo-9H-fluorene-4-carboxylate                    | 253605-71-9  | [O-][N+](=O)c1cc2C(=O)c3cc(cc(c3-c2c1)C(=O)OCC(F)(F)C(F)(F)C(F)(F)C(F)(F)F)[N+]]([O-])=O)[N+]]([O-])=O                                               |
| QL00384 | 2,2,3,3,4,4,4-Heptafluoro-1-(4-nitrophenyl)butan-1-one                                               | 144459-62-1  | [O-][N+](=O)c1ccc(cc1)C(=O)C(F)(F)C(F)(F)C(F)(F)F                                                                                                    |
| QL00385 | 1-(1,1,1,2,3,3,3-Heptafluoropropan-2-yl)-4-nitrobenzene                                              | 2396-14-7    | [O-][N+](=O)c1ccc(cc1)C(F)(C(F)(F)F)C(F)(F)F                                                                                                         |
| QL00386 | 1-Nitro-4-(nonafluorobutyl)benzene                                                                   | 196932-95-3  | [O-][N+](=O)c1ccc(cc1)C(F)(F)C(F)(F)C(F)(F)C(F)(F)F                                                                                                  |
| QL00387 | 1-(Heptafluoropropyl)-4-nitrobenzene                                                                 | 1300746-85-3 | [O-][N+](=O)c1ccc(cc1)C(F)(F)C(F)(F)C(F)(F)F                                                                                                         |
| QL00388 | 2,2,3,3,4,4,5,5,6,6,7,7,8,8,9,9,9-Heptadecafluoro-N-(4-nitrophenyl)nonanamide                        | 164796-46-7  | [O-][N+](=O)c1ccc(NC(=O)C(F)(F)C(F)(F)C(F)(F)C(F)(F)C(F)(F)C(F)(F)C(F)(F)C(F)(F)F)cc1                                                                |
| QL00389 | 2,2,3,3,4,4,5,5,6,6,7,7,7-Tridecafluoro-N-(4-nitrophenyl)heptanamide                                 | 164796-44-5  | [O-][N+](=O)c1ccc(NC(=O)C(F)(F)C(F)(F)C(F)(F)C(F)(F)C(F)(F)F)cc1                                                                                     |
| QL00390 | 2,2,3,3,4,4,5,5,5-Nonafluoro-N-(4-nitrophenyl)pentanamide                                            | 150333-62-3  | [O-][N+](=O)c1ccc(NC(=O)C(F)(F)C(F)(F)C(F)(F)C(F)(F)F)cc1                                                                                            |
| QL00391 | N-(2,4-Dinitrophenyl)-2,3,3,3-tetrafluoro-2-(heptafluoropropoxy)propanamide                          | 105936-30-9  | [O-][N+](=O)c1ccc(NC(=O)C(F)(OC(F)(F)C(F)(F)C(F)(F)C(F)(F)F)C(F)(F)F)cc1[N+]]([O-])=O                                                                |
| QL00392 | 1-Nitro-4-[(2,2,3,3,4,4,5,5,6,6,6-undecafluorohexyl)oxy]benzene                                      | 183997-46-8  | [O-][N+](=O)c1ccc(OCC(F)(F)C(F)(F)C(F)(F)C(F)(F)C(F)(F)F)cc1                                                                                         |
| QL00393 | 1-(2,2,3,3,4,4,4-Heptafluorobutoxy)-4-nitrobenzene                                                   | 109230-68-4  | [O-][N+](=O)c1ccc(OCC(F)(F)C(F)(F)C(F)(F)F)cc1                                                                                                       |
| QL00394 | 2-(Heptafluoropropyl)-6-nitro-1H-benzimidazole                                                       | 6826-38-6    | [O-][N+](=O)c1ccc2nc(Nc2c1)C(F)(F)C(F)(F)C(F)(F)F                                                                                                    |
| QL00395 | 1-Nitro-3-(undecafluoropentyl)benzene                                                                | 1463530-16-6 | [O-][N+](=O)c1cccc(c1)C(F)(F)C(F)(F)C(F)(F)C(F)(F)C(F)(F)F                                                                                           |
| QL00396 | 1-Nitro-3-(nonafluorobutyl)benzene                                                                   | 2398-76-7    | [O-][N+](=O)c1cccc(c1)C(F)(F)C(F)(F)C(F)(F)C(F)(F)F                                                                                                  |
| QL00397 | 1,1,1,2,2,3,3-heptafluoro-5-nitro-4-(nitromethyl)pentane                                             | 355-91-9     | [O-][N+](=O)CC(C[N+]]([O-])=O)C(F)(F)C(F)(F)C(F)(F)F                                                                                                 |
| QL00398 | 3,3,4,4,5,5,6,6,6-Nonafluorohexyl nitrate                                                            | 34839-44-6   | [O-][N+](=O)OCC(F)(F)C(F)(F)C(F)(F)C(F)(F)F                                                                                                          |
| QL00399 | Perfluorooctanoate ion(1-)                                                                           | 45285-51-6   | [O-]C(=O)C(F)(F)C(F)(F)C(F)(F)C(F)(F)C(F)(F)C(F)(F)F                                                                                                 |
| QL00400 | Perfluoroheptanoate                                                                                  | 120885-29-2  | [O-]C(=O)C(F)(F)C(F)(F)C(F)(F)C(F)(F)C(F)(F)F                                                                                                        |
| QL00401 | 1-Propanaminium, 3-[[[(heptadecafluorooctyl)sulfonyl]amino]-N,N,N-trimethyl-, sulfate (21)]          | 70225-26-2   | [O-]S([O-])(=O)=O.C[N+](C)(C)CCCN(S(=O)(=O)C(F)(F)C(F)(F)C(F)(F)C(F)(F)C(F)(F)C(F)(F)C(F)(F)F.C[N+](C)(C)CCCN(S(=O)(=O)C(F)(F)C(F)(F)C(F)(F)C(F)(F)F |
| QL00402 | Perfluorooctanesulfonate                                                                             | 45298-90-6   | [O-]S(=O)(=O)C(F)(F)C(F)(F)C(F)(F)C(F)(F)C(F)(F)C(F)(F)F                                                                                             |
| QL00403 | Perfluorohexanesulfonate                                                                             | 108427-53-8  | [O-]S(=O)(=O)C(F)(F)C(F)(F)C(F)(F)C(F)(F)C(F)(F)F                                                                                                    |

|       |      |      |   |     |
|-------|------|------|---|-----|
| -8.31 | 0.67 | 2.75 | P | IN  |
| -6.80 | 0.62 | 2.64 | P | OUT |
| -6.77 | 0.65 | 2.19 | P | IN  |
| -8.09 | 0.64 | 3.01 | P | OUT |
| -5.44 | 0.64 | 1.72 | P | IN  |
| -7.02 | 0.64 | 2.52 | P | OUT |
| -6.69 | 0.63 | 2.42 | P | OUT |
| -6.95 | 0.63 | 2.53 | P | OUT |
| -6.95 | 0.63 | 2.53 | P | OUT |
| -6.43 | 0.63 | 2.29 | P | OUT |
| -6.53 | 0.66 | 1.97 | P | IN  |
| -6.58 | 0.64 | 2.19 | P | IN  |
| -6.59 | 0.63 | 2.45 | P | OUT |
| -7.68 | 0.63 | 2.89 | P | OUT |
| -6.95 | 0.64 | 2.47 | P | IN  |
| -6.20 | 0.64 | 2.10 | P | IN  |
| -7.21 | 0.65 | 2.46 | P | IN  |
| -6.66 | 0.64 | 2.29 | P | IN  |
| -8.78 | 0.66 | 3.09 | P | IN  |
| -8.21 | 0.65 | 2.90 | P | IN  |
| -7.45 | 0.64 | 2.68 | P | IN  |
| -7.55 | 0.64 | 2.71 | P | IN  |
| -7.67 | 0.65 | 2.72 | P | IN  |
| -6.87 | 0.63 | 2.53 | P | OUT |
| -7.01 | 0.64 | 2.46 | P | IN  |
| -7.36 | 0.65 | 2.47 | P | IN  |
| -6.77 | 0.65 | 2.26 | P | IN  |
| -5.57 | 0.63 | 1.89 | P | OUT |
| -6.70 | 0.64 | 2.27 | P | IN  |
| -7.72 | 0.68 | 2.24 | P | IN  |
| -7.50 | 0.68 | 2.16 | P | IN  |
| -9.03 | 0.67 | 3.14 | P | OUT |
| -8.37 | 0.69 | 2.44 | P | IN  |
| -7.74 | 0.69 | 2.15 | P | IN  |



[illegible]











[illegible]

|         |                                                                                                                                                                           |            |                                                                                         |
|---------|---------------------------------------------------------------------------------------------------------------------------------------------------------------------------|------------|-----------------------------------------------------------------------------------------|
| QL00605 | 1-Hexanesulfonamide, 1,1,2,2,3,3,4,4,5,5,6,6,6-tridecafluoro-N-(4-hydroxybutyl)-N-methyl-                                                                                 | 68239-74-7 | C(N([S](=O)(=O)C(F)(F)C(F)(F)C(F)(F)C(F)(F)C(F)(F)C(C)COCCO                             |
| QL00606 | 4-[Methyl[(tridecafluorohexyl)sulfonyl]amino]butyl methacrylate                                                                                                           | 67939-61-1 | C(N([S](=O)(=O)C(F)(F)C(F)(F)C(F)(F)C(F)(F)C(F)(F)C(F)(F)C(C)CCCC(=O)C(=C)C             |
| QL00607 | 2-Propenoic acid, 4-[methyl[(tridecafluorohexyl)sulfonyl]amino]butyl ester N-(2-Hydroxyethyl)-N-                                                                          | 68227-98-5 | C(N([S](=O)(=O)C(F)(F)C(F)(F)C(F)(F)C(F)(F)C(F)(F)C(C)CCCC(=O)C=C                       |
| QL00608 | methylperfluorohexanesulfonamide                                                                                                                                          | 68555-75-9 | C(N([S](=O)=O)C(F)(F)C(F)(F)C(F)(F)C(F)(F)C(F)(F)C(C)CO                                 |
| QL00609 | 2-Propenoic acid, 2-methyl-, 2-[methyl[(tridecafluorohexyl)sulfonyl]amino]ethyl ester                                                                                     | 67584-61-6 | C(N([S](=O)=(O)C(F)(F)C(F)(F)C(F)(F)C(F)(F)C(F)(F)C(C)COC(=O)C(=C)C                     |
| QL00610 | 2-Propenoic acid, 2-[methyl[(tridecafluorohexyl)sulfonyl]amino]ethyl ester                                                                                                | 67584-57-0 | C(N([S](=O)=(O)C(F)(F)C(F)(F)C(F)(F)C(F)(F)C(F)(F)C(C)COC(=O)C=C                        |
| QL00611 | N-Ethyl-N-((tridecafluorohexyl)sulfonyl)glycine Glycine, N-ethyl-N-[(tridecafluorohexyl)sulfonyl]-, ethyl ester                                                           | 68957-32-4 | C(N([S](=O)=(O)C(F)(F)C(F)(F)C(F)(F)C(F)(F)C(F)(F)C(C)(=O)O)C                           |
| QL00612 | 3-(Carboxymethyl(perfluorohexylsulfonyl)amino)-N,N,N-trimethylpropanaminium (2-Hydroxyethyl)dimethyl[3-(3-sulfopropyl)((tridecafluorohexyl)sulfonyl)amino]propyla mmonium | 68957-53-9 | C(N([S](=O)=O)C(F)(F)C(F)(F)C(F)(F)C(F)(F)C(F)(F)C(C)(=O)OCC)C                          |
| QL00613 | 3-(Carboxymethyl(perfluorohexylsulfonyl)amino)-N,N,N-trimethylpropanaminium (2-Hydroxyethyl)dimethyl[3-(3-sulfopropyl)((tridecafluorohexyl)sulfonyl)amino]propyla mmonium | 38850-52-1 | C(N([S](=O)=(O)C(F)(F)C(F)(F)C(F)(F)C(F)(F)C(F)(F)C(C)[C+](N)C(C)C([O-])=O              |
| QL00614 |                                                                                                                                                                           | 38850-58-7 | C(N([S](=O)=O)C(F)(F)C(F)(F)C(F)(F)C(F)(F)C(F)(F)C(C)CCC[S][[O-]](=O)=O)CC[N+](CCO)(C)C |
| QL00615 | 1-Hexanesulfonamide, N-ethyl-1,1,2,2,3,3,4,4,5,5,6,6,6-tridecafluoro-N-(2-hydroxyethyl)-                                                                                  | 34455-03-3 | C(N([S](=O)=(O)C(F)(F)C(F)(F)C(F)(F)C(F)(F)C(F)(F)C(C)CO)C                              |
| QL00616 | N-Ethyl-N-{2-(phosphonooxy)ethyl}perfluorohexanesulfonamide                                                                                                               | 67969-65-7 | C(N([S](=O)=O)C(F)(F)C(F)(F)C(F)(F)C(F)(F)C(F)(F)C(COP(=O)(O)O)C                        |
| QL00617 | 2-Propenoic acid, 2-methyl-, 2-[ethyl[(tridecafluorohexyl)sulfonyl]amino]ethyl ester                                                                                      | 67906-70-1 | C(N([S](=O)=(O)C(F)(F)C(F)(F)C(F)(F)C(F)(F)C(F)(F)C(C)CCCC(=O)C(=C)C                    |
| QL00618 | 2-Propenoic acid, 2-[ethyl[(tridecafluorohexyl)sulfonyl]amino]ethyl ester                                                                                                 | 1893-52-3  | C(N([S](=O)=(O)C(F)(F)C(F)(F)C(F)(F)C(F)(F)C(F)(F)C(C)CCCC(=O)C(=C)C                    |
| QL00619 | 1-Pentanesulfonamide, 1,1,2,2,3,3,4,4,5,5,5-undecafluoro-N-(4-hydroxybutyl)-N-methyl-                                                                                     | 68239-72-5 | C(N([S](=O)=(O)C(F)(F)C(F)(F)C(F)(F)C(F)(F)C(F)(F)C(C)CCCO                              |
| QL00620 | 4-[Methyl[(undecafluoropentyl)sulfonyl]amino]butyl methacrylate                                                                                                           | 67906-40-5 | C(N([S](=O)=(O)C(F)(F)C(F)(F)C(F)(F)C(F)(F)C(F)(F)C(C)CCCC(=O)C(=C)C                    |
| QL00621 | 2-Propenoic acid, 4-[methyl[(undecafluoropentyl)sulfonyl]amino]butyl ester                                                                                                | 68227-99-6 | C(N([S](=O)=(O)C(F)(F)C(F)(F)C(F)(F)C(F)(F)C(F)(F)C(C)CCCC(=O)C=C                       |
| QL00622 | 2-Propenoic acid, 2-methyl-, 2-[methyl[(undecafluoropentyl)sulfonyl]amino]ethyl ester                                                                                     | 67584-60-5 | C(N([S](=O)=(O)C(F)(F)C(F)(F)C(F)(F)C(F)(F)C(F)(F)C(C)COC(=O)C(=C)C                     |
| QL00623 | Glycine, N-ethyl-N-[(undecafluoropentyl)sulfonyl]- Glycine, N-ethyl-N-[(undecafluoropentyl)sulfonyl]-, ethyl ester                                                        | 68957-31-3 | C(N([S](=O)=(O)C(F)(F)C(F)(F)C(F)(F)C(F)(F)C(F)(F)C(C)(=O)O)C                           |
| QL00624 |                                                                                                                                                                           | 68555-79-3 | C(N([S](=O)=(O)C(F)(F)C(F)(F)C(F)(F)C(F)(F)C(F)(F)C(C)(=O)OCC)C                         |
| QL00625 | N-Ethyl-N-(2-(phosphonooxy)ethyl)perfluoropentanesulfonamide                                                                                                              | 67939-90-6 | C(N([S](=O)=(O)C(F)(F)C(F)(F)C(F)(F)C(F)(F)C(F)(F)C(COP(=O)(O)O)C                       |
| QL00626 | 2-Propenoic acid, 2-methyl-, 2-[ethyl[(undecafluoropentyl)sulfonyl]amino]ethyl ester                                                                                      | 67906-73-4 | C(N([S](=O)=(O)C(F)(F)C(F)(F)C(F)(F)C(F)(F)C(F)(F)C(C)CCCC(=O)C(=C)C                    |
| QL00627 | 2-Propenoic acid, 2-[ethyl[(undecafluoropentyl)sulfonyl]amino]ethyl ester                                                                                                 | 68298-06-6 | C(N([S](=O)=(O)C(F)(F)C(F)(F)C(F)(F)C(F)(F)C(F)(F)C(C)CCCC(=O)C(=C)C                    |
| QL00628 | 1-Butanesulfonamide, 1,1,2,2,3,3,4,4,4-nonafluoro-N-(4-hydroxybutyl)-N-methyl-                                                                                            | 812-94-2   | C(N([S](=O)=(O)C(F)(F)C(F)(F)C(F)(F)C(F)(F)C(C)CCCO                                     |
| QL00629 | 4-[Methyl[[nonafluorobutyl)sulfonyl]amino]butyl methacrylate                                                                                                              | 67906-39-2 | C(N([S](=O)=(O)C(F)(F)C(F)(F)C(F)(F)C(F)(F)C(F)(F)C(C)CCCC(=O)C(=C)C                    |







[illegible]











|         |                                                                                                                                                                                                                                                                                                                                                                                                                                                                                                     |                                                   |                                                                  |       |      |      |   |     |
|---------|-----------------------------------------------------------------------------------------------------------------------------------------------------------------------------------------------------------------------------------------------------------------------------------------------------------------------------------------------------------------------------------------------------------------------------------------------------------------------------------------------------|---------------------------------------------------|------------------------------------------------------------------|-------|------|------|---|-----|
| QL00871 | 4,4,5,5,6,6,7,7,8,8,9,9-Tridecafluoro-2-hydroxynonyl 2-methylprop-2-enoate                                                                                                                                                                                                                                                                                                                                                                                                                          | 86994-47-0                                        | CC(=C)C(=O)OCC(O)CC(F)(F)C(F)(F)C(F)(F)C(F)(F)C(F)(F)F           | -7.95 | 0.65 | 2.76 | P | IN  |
| QL00872 | 4,4,5,5,6,6,7,7,7-Nonafluoro-2-hydroxyheptyl 2-methylprop-2-enoate                                                                                                                                                                                                                                                                                                                                                                                                                                  | 36915-03-4                                        | CC(=C)C(=O)OCC(O)CC(F)(F)C(F)(F)C(F)(F)C(F)(F)F                  | -7.15 | 0.64 | 2.52 | P | IN  |
| QL00873 | (Perfluorocyclohexyl)methyl methacrylate                                                                                                                                                                                                                                                                                                                                                                                                                                                            | 25965-83-7                                        | CC(=C)C(=O)OCC1(F)C(F)(F)C(F)(F)C(F)(F)C1(F)F                    | -7.26 | 0.67 | 2.20 | P | IN  |
| QL00874 | 2-(Perfluoro-3-methylbutyl)ethyl methacrylate                                                                                                                                                                                                                                                                                                                                                                                                                                                       | 65195-44-0                                        | CC(=C)C(=O)OCC(C(F)(F)C(F)(F)C(F)(F)C(F)(F)F                     | -7.00 | 0.65 | 2.35 | P | IN  |
| QL00875 | 3,3,4,4,5,5,6,6,7,7-Decafluorooctyl 2-methylprop-2-enoate                                                                                                                                                                                                                                                                                                                                                                                                                                           | 61915-92-2                                        | CC(=C)C(=O)OCCC(F)(F)C(F)(F)C(F)(F)C(F)(F)C(F)(F)F               | -7.45 | 0.65 | 2.53 | P | IN  |
| QL00876 | (Perfluoro-5-methylhexyl)ethyl 2-methylprop-2-enoate                                                                                                                                                                                                                                                                                                                                                                                                                                                | 50836-66-3                                        | CC(=C)C(=O)OCCC(F)(F)C(F)(F)C(F)(F)C(F)(F)C(F)(F)F               | -7.88 | 0.66 | 2.65 | P | IN  |
| QL00877 | 102 Fluorotelomer methacrylate                                                                                                                                                                                                                                                                                                                                                                                                                                                                      | 2144-54-9                                         | CC(=C)C(=O)OCCC(F)(F)C(F)(F)C(F)(F)C(F)(F)C(F)(F)C(F)(F)C(F)(F)F | -9.02 | 0.67 | 3.07 | P | OUT |
| QL00878 | 82 Fluorotelomer methacrylate                                                                                                                                                                                                                                                                                                                                                                                                                                                                       | 1996-88-9                                         | CC(=C)C(=O)OCCC(F)(F)C(F)(F)C(F)(F)C(F)(F)C(F)(F)C(F)(F)F        | -8.53 | 0.67 | 2.90 | P | IN  |
| QL00879 | 3,3,4,4,5,5,5-Heptafluoropentyl 2-methylprop-2-enoate                                                                                                                                                                                                                                                                                                                                                                                                                                               | 2145-81-5                                         | CC(=C)C(=O)OCCC(F)(F)C(F)(F)C(F)(F)F                             | -6.38 | 0.64 | 2.21 | P | IN  |
| QL00880 | Poly(difluoromethylene), alpha-fluoro-omega-[2-[(2-methyl-1-oxo-2-propenyl)oxy]ethyl]-[2-Propenoic acid, esters, 2-methyl-, dodecyl ester, polymer with .alpha.-fluoro-omega-[2-[(2-methyl-1-oxo-2-propen-1-yl)oxy]ethyl]poly(difluoromethylene)] 2-Propenoic acid, 2-methyl-, 2-ethylhexyl ester, polymer with a-fluoro-<U+03C9>-[2-[(2-methyl-1-oxo-2-propen-1-yl)oxy]ethyl]poly(difluoromethylene), 2-hydroxyethyl 2-methyl-2-propenoate and N-(hydroxymethyl)-2-propenamide   POLYFLGSID_897592 | 65530-66-7   65605-58-5   68239-43-0   65636-35-3 | CC(=C)C(=O)OCCC(F)(F)F                                           | -4.57 | 0.59 | 1.89 | P | OUT |
| QL00881 | 4,4,5,5,6,6,7,7,8,8,9,9,10,10,11,11,11-Heptadecafluoroundecyl 2-methylprop-2-enoate                                                                                                                                                                                                                                                                                                                                                                                                                 | 150625-20-0                                       | CC(=C)C(=O)OCCCC(F)(F)C(F)(F)C(F)(F)C(F)(F)C(F)(F)C(F)(F)F       | -8.49 | 0.66 | 2.95 | P | IN  |
| QL00882 | 4,4,5,5,6,6,7,7,8,8,9,9,9-Tridecafluorononyl 2-methylprop-2-enoate                                                                                                                                                                                                                                                                                                                                                                                                                                  | 1228350-17-1                                      | CC(=C)C(=O)OCCCC(F)(F)C(F)(F)C(F)(F)C(F)(F)C(F)(F)F              | -7.89 | 0.65 | 2.76 | P | IN  |
| QL00883 | 4,4,5,5,6,6,7,7,7-Nonafluoroheptyl 2-methylprop-2-enoate                                                                                                                                                                                                                                                                                                                                                                                                                                            | 243842-15-1                                       | CC(=C)C(=O)OCCCC(F)(F)C(F)(F)C(F)(F)F                            | -7.00 | 0.64 | 2.49 | P | IN  |
| QL00884 | 2-[(2-Methylprop-2-enoyl)oxy]ethyl heptafluorobutanoate                                                                                                                                                                                                                                                                                                                                                                                                                                             | 146615-73-8                                       | CC(=C)C(=O)OCCOC(=O)C(F)(F)C(F)(F)C(F)(F)F                       | -6.69 | 0.63 | 2.49 | P | OUT |
| QL00885 | 5-[(Perfluoro-5-methylhexyl)ethyl]-2-methylpropenethioate                                                                                                                                                                                                                                                                                                                                                                                                                                           | 30769-91-6                                        | CC(=C)C(=O)SCCC(F)(F)C(F)(F)C(F)(F)C(F)(F)C(F)(F)F               | -7.88 | 0.66 | 2.65 | P | IN  |
| QL00886 | 5-[(Perfluoro-7-(methyl)octyl)ethyl] thiomethacrylate                                                                                                                                                                                                                                                                                                                                                                                                                                               | 28506-33-4                                        | CC(=C)C(=O)SCCC(F)(F)C(F)(F)C(F)(F)C(F)(F)C(F)(F)C(F)(F)F        | -8.47 | 0.67 | 2.86 | P | IN  |
| QL00887 | 5-[(Perfluoro-9-methyldecyl)ethyl] 2-methyl-2-propenethioate                                                                                                                                                                                                                                                                                                                                                                                                                                        | 30769-88-1                                        | CC(=C)C(=O)SCCC(F)(F)C(F)(F)C(F)(F)C(F)(F)C(F)(F)C(F)(F)C(F)(F)F | -8.97 | 0.67 | 3.04 | P | OUT |
| QL00888 | 3-[[1,1,1,2,3,3,3-Heptafluoropropan-2-yl)oxy]-2-methylprop-1-ene                                                                                                                                                                                                                                                                                                                                                                                                                                    | 38471-83-9                                        | CC(=C)COC(F)(F)C(F)(F)C(F)(F)F                                   | -5.36 | 0.64 | 1.64 | P | IN  |
| QL00889 | 3-Acetyl-5,5,6,6,7,7,8,8,8-nonafluorooctane-2,4-dione                                                                                                                                                                                                                                                                                                                                                                                                                                               | 120110-91-0                                       | CC(=O)C(C(C)=O)C(=O)C(F)(F)C(F)(F)C(F)(F)F                       | -6.72 | 0.65 | 2.15 | P | IN  |
| QL00890 | 3,3,4,4,5,5,6,6,7,7,8,8,9,9,9-Pentadecafluorononan-2-one                                                                                                                                                                                                                                                                                                                                                                                                                                            | 754-85-8                                          | CC(=O)C(F)(F)C(F)(F)C(F)(F)C(F)(F)C(F)(F)C(F)(F)F                | -7.72 | 0.68 | 2.24 | P | IN  |
| QL00891 | 3,3,4,4,5,5,6,6,7,7,8,8,8-Tridecafluorooctan-2-one                                                                                                                                                                                                                                                                                                                                                                                                                                                  | 80793-21-1                                        | CC(=O)C(F)(F)C(F)(F)C(F)(F)C(F)(F)C(F)(F)C(F)(F)F                | -7.50 | 0.68 | 2.16 | P | IN  |
| QL00892 | Methyl perfluoropentyl ketone                                                                                                                                                                                                                                                                                                                                                                                                                                                                       | 2708-07-8                                         | CC(=O)C(F)(F)C(F)(F)C(F)(F)C(F)(F)F                              | -6.91 | 0.68 | 1.90 | P | IN  |
| QL00893 | Methyl perfluorobutyl ketone                                                                                                                                                                                                                                                                                                                                                                                                                                                                        | 678-18-2                                          | CC(=O)C(F)(F)C(F)(F)C(F)(F)F                                     | -6.61 | 0.67 | 1.81 | P | IN  |
| QL00894 | Methyl heptafluoropropylketone                                                                                                                                                                                                                                                                                                                                                                                                                                                                      | 355-17-9                                          | CC(=O)C(F)(F)C(F)(F)C(F)(F)F                                     | -5.76 | 0.67 | 1.46 | P | IN  |
| QL00895 | Methyl perfluoroethyl ketone                                                                                                                                                                                                                                                                                                                                                                                                                                                                        | 374-41-4                                          | CC(=O)C(F)(F)C(F)(F)F                                            | -5.29 | 0.66 | 1.36 | P | IN  |
| QL00896 | 3,4,5,5,6,6,7,7,8,8,9,9,10,10,10-Pentadecafluorodec-3-en-2-one                                                                                                                                                                                                                                                                                                                                                                                                                                      | 92604-91-6                                        | CC(=O)C(F)=C(F)C(F)(F)C(F)(F)C(F)(F)C(F)(F)C(F)(F)F              | -7.78 | 0.67 | 2.46 | P | IN  |
| QL00897 | (3Z)-4,5,5,6,6,7,7,8,8,9,9,10,10,11,11,11-Hexadecafluoroundec-3-en-2-one                                                                                                                                                                                                                                                                                                                                                                                                                            | 136909-85-8                                       | CC(=O)C=C(F)C(F)(F)C(F)(F)C(F)(F)C(F)(F)C(F)(F)C(F)(F)F          | -7.87 | 0.67 | 2.51 | P | IN  |
| QL00898 | 4-Amino-5,5,6,6,7,7,7-heptafluorohept-3-en-2-one                                                                                                                                                                                                                                                                                                                                                                                                                                                    | 70168-24-0                                        | CC(=O)C=C(N)C(F)(F)C(F)(F)C(F)(F)F                               | -6.07 | 0.65 | 1.92 | P | IN  |
| QL00899 | 1-[4-(Heptafluoropropyl)-1H-pyrrol-3-yl]ethan-1-one                                                                                                                                                                                                                                                                                                                                                                                                                                                 | 121103-97-7                                       | CC(=O)C1=CNC=C1C(F)(F)C(F)(F)C(F)(F)F                            | -5.96 | 0.64 | 1.91 | P | IN  |
| QL00900 | 1-[4-(1,1,1,2,3,3,3-Heptafluoropropan-2-yl)phenyl]ethan-1-one                                                                                                                                                                                                                                                                                                                                                                                                                                       | 353273-22-0                                       | CC(=O)c1ccc(cc1)C(F)(F)C(F)(F)C(F)(F)F                           | -6.20 | 0.64 | 2.10 | P | IN  |
| QL00901 | 5,5,6,6,7,7,8,8,9,9,10,10,11,11,12,12,12-Heptadecafluorododecane-2,4-dione                                                                                                                                                                                                                                                                                                                                                                                                                          | 203201-14-3                                       | CC(=O)CC(=O)C(F)(F)C(F)(F)C(F)(F)C(F)(F)C(F)(F)C(F)(F)C(F)(F)F   | -8.30 | 0.67 | 2.69 | P | IN  |



|         |                                                                                                                                                                                                                                                                                                                                                                                                                                                                                                                                                                                                                                                                                                                                                                                                                                                                     |                                                                                                                                                                                                                                              |                                                                                                                                                                   |        |      |      |   |     |
|---------|---------------------------------------------------------------------------------------------------------------------------------------------------------------------------------------------------------------------------------------------------------------------------------------------------------------------------------------------------------------------------------------------------------------------------------------------------------------------------------------------------------------------------------------------------------------------------------------------------------------------------------------------------------------------------------------------------------------------------------------------------------------------------------------------------------------------------------------------------------------------|----------------------------------------------------------------------------------------------------------------------------------------------------------------------------------------------------------------------------------------------|-------------------------------------------------------------------------------------------------------------------------------------------------------------------|--------|------|------|---|-----|
| QL00938 | 4,4,5,5,6,6,6-Heptafluorohexyl acetate                                                                                                                                                                                                                                                                                                                                                                                                                                                                                                                                                                                                                                                                                                                                                                                                                              | 25600-64-0                                                                                                                                                                                                                                   | CC(=O)OCCCC(F)(F)C(F)(F)C(F)(F)F                                                                                                                                  | -6.12  | 0.63 | 2.23 | P | OUT |
| QL00939 | S-[3,4,4,4-Tetrafluoro-3-(trifluoromethyl)butyl] ethanethioate                                                                                                                                                                                                                                                                                                                                                                                                                                                                                                                                                                                                                                                                                                                                                                                                      | 1097631-01-0                                                                                                                                                                                                                                 | CC(=O)SCCC(F)(C(F)(F)F)C(F)(F)F                                                                                                                                   | -5.34  | 0.63 | 1.75 | P | OUT |
| QL00940 | S-(3,3,4,4,5,5,6,6,7,7,8,8,9,9,10,10,10-Heptadecafluorodecyl) ethanethioate                                                                                                                                                                                                                                                                                                                                                                                                                                                                                                                                                                                                                                                                                                                                                                                         | 125640-21-3                                                                                                                                                                                                                                  | CC(=O)SCCC(F)(F)C(F)(F)C(F)(F)C(F)(F)C(F)(F)C(F)(F)C(F)(F)F                                                                                                       | -8.23  | 0.67 | 2.74 | P | IN  |
| QL00941 | S-(3,3,4,4,5,5,6,6,7,7,8,8,8-Tridecafluorooctyl) ethanethioate                                                                                                                                                                                                                                                                                                                                                                                                                                                                                                                                                                                                                                                                                                                                                                                                      | 213681-67-5                                                                                                                                                                                                                                  | CC(=O)SCCC(F)(F)C(F)(F)C(F)(F)C(F)(F)C(F)(F)C(F)(F)F                                                                                                              | -7.57  | 0.66 | 2.52 | P | IN  |
| QL00942 | 2-Bromo-3-(bromomethyl)-4,4,5,5,6,6,6-heptafluorohexan-3-ol                                                                                                                                                                                                                                                                                                                                                                                                                                                                                                                                                                                                                                                                                                                                                                                                         | 93339-87-8                                                                                                                                                                                                                                   | CC(Br)C(O)(CBr)C(F)(F)C(F)(F)C(F)(F)F                                                                                                                             | -6.13  | 0.66 | 1.79 | P | IN  |
| QL00943 | 2-Methyl-2-trifluoromethylperfluoropentane                                                                                                                                                                                                                                                                                                                                                                                                                                                                                                                                                                                                                                                                                                                                                                                                                          | 100645-99-6                                                                                                                                                                                                                                  | CC(C(F)(F)F)(C(F)(F)C(F)(F)C(F)(F)C(F)(F)F                                                                                                                        | -6.74  | 0.68 | 1.72 | P | IN  |
| QL00944 | 3,3,4,4,5,5,6,6,7,7,8,8,9,9,10,10,10-Heptadecafluoro-2-methyldecanoic acid                                                                                                                                                                                                                                                                                                                                                                                                                                                                                                                                                                                                                                                                                                                                                                                          | 136022-86-1                                                                                                                                                                                                                                  | CC(C(O)=O)C(F)(F)C(F)(F)C(F)(F)C(F)(F)C(F)(F)C(F)(F)C(F)(F)F                                                                                                      | -8.15  | 0.68 | 2.52 | P | IN  |
| QL00945 | 1,1,1,2,2,3,3,4,4,5,5,6,6-Tridecafluoro-7-methyl-7-nitrooctane<br>Calcium (3t)-6,6,6,6,6,6,6,8,8-heptafluoro-2,2-dimethyl-5-oxooct-3-en-3-olate (3Z)-6,6,7,7,8,8,8-heptafluoro-2,2-dimethyl-5-oxooct-3-en-3-olate (1/1/1) 1,1,1,2,2,3,3-heptafluoro-6-hydroxy-7,7-dimethyloct-5-en-4-one  Silver, (6,6,7,7,8,8,8-heptafluoro-2,2-dimethyl-3,5-octanedionato-BO3,BO5)- 1,1,1,2,2,3,3-Heptafluoro-6-hydroxy-7,7-dimethyloct-5-en-4-one--copper (2/1)  Lead, bis(6,6,7,7,8,8,8-heptafluoro-2,2-dimethyl-3,5-octanedionato-BO,BO'), (T-4)- (9Cl) Europium, tris(6,6,7,7,8,8,8-heptafluoro-2,2-dimethyl-3,5-octanedionato-BO3,BO5)-  Erbium, tris(6,6,7,7,8,8,8-heptafluoro-2,2-dimethyl-3,5-octanedionato-BO3,BO5)-  Neodymium, tris(6,6,7,7,8,8,8-heptafluoro-2,2-dimethyl-3,5-octanedionato-BO3,BO5)-  Praseodymium, tris(6,6,7,7,8,8,8-heptafluoro-2,2-dimethyl-3,5- | 84108-41-8<br>12405-3-49-<br>2 62773-05-<br>1 76121-99-<br>8 38926-19-<br>1 21600-78-<br>2 17631-68-<br>4 17978-75-<br>5 17978-76-<br>6 17978-77-<br>7 18323-96-<br>1 18323-97-<br>2 18323-98-<br>3 172424-98-<br>5 19106-89-<br>9 19186-73- | CC(C)([N+](O-)=O)C(F)(F)C(F)(F)C(F)(F)C(F)(F)C(F)(F)C(F)(F)F                                                                                                      | -7.72  | 0.68 | 2.24 | P | IN  |
| QL00946 | N-[1-[3,5-Bis([(tert-butyl(dimethyl)silyl]oxy)methyl)phenyl]-2,2,3,3,4,4,5,5,6,6,7,7-tridecafluoroheptylidene]hydroxylamine                                                                                                                                                                                                                                                                                                                                                                                                                                                                                                                                                                                                                                                                                                                                         | 1335496-61-1                                                                                                                                                                                                                                 | CC(C)(C)[Si](C)(C)OCc1cc(CO[Si](C)(C)C(C)(C)C)cc(c1)C(=NO)C(F)(F)C(F)(F)C(F)(F)C(F)(F)C(F)(F)C(F)(F)F                                                             | -6.95  | 0.66 | 2.15 | P | IN  |
| QL00947 | 1-[3,5-Bis([(tert-butyl(dimethyl)silyl]oxy)methyl)phenyl]-2,2,3,3,4,4,5,5,6,6,7,7-tridecafluoroheptan-1-one                                                                                                                                                                                                                                                                                                                                                                                                                                                                                                                                                                                                                                                                                                                                                         | 1335496-60-0                                                                                                                                                                                                                                 | CC(C)(C)[Si](C)(C)OCc1cc(CO[Si](C)(C)C(C)(C)C)cc(c1)C(=O)C(F)(F)C(F)(F)C(F)(F)C(F)(F)C(F)(F)C(F)(F)F                                                              | -8.31  | 0.66 | 2.89 | P | IN  |
| QL00948 | 6,6,7,7,8,8,8-Heptafluoro-2,2-dimethyl-3,4,5-octanetrione 4-(4-nitrophenyl)hydrazone                                                                                                                                                                                                                                                                                                                                                                                                                                                                                                                                                                                                                                                                                                                                                                                | 80284-51-1                                                                                                                                                                                                                                   | CC(C)(C)C(=O)C(=NNC1=CC=C(C=C1)[N+](O-)=O)C(F)(F)C(F)(F)C(F)(F)F                                                                                                  | -8.47  | 0.66 | 2.88 | P | IN  |
| QL00949 | 6,6,7,7,8,8,9,9-Nonafluoro-2,2-dimethylnon-4-en-3-one                                                                                                                                                                                                                                                                                                                                                                                                                                                                                                                                                                                                                                                                                                                                                                                                               | 105602-69-5                                                                                                                                                                                                                                  | CC(C)(C)C(=O)C=CC(F)(F)C(F)(F)C(F)(F)C(F)(F)F                                                                                                                     | -7.26  | 0.63 | 2.68 | P | OUT |
| QL00950 | (Heptafluorobutanoyl)pivaloylmethane                                                                                                                                                                                                                                                                                                                                                                                                                                                                                                                                                                                                                                                                                                                                                                                                                                | 17587-22-3                                                                                                                                                                                                                                   | CC(C)(C)C(=O)CC(=O)C(F)(F)C(F)(F)C(F)(F)F                                                                                                                         | -7.25  | 0.67 | 2.24 | P | IN  |
| QL00951 | 4H,4H-Perfluoro-6,6-dimethylheptane-3,5-dione                                                                                                                                                                                                                                                                                                                                                                                                                                                                                                                                                                                                                                                                                                                                                                                                                       | 2145-68-8                                                                                                                                                                                                                                    | CC(C)(C)C(=O)CC(=O)C(F)(F)C(F)(F)F                                                                                                                                | -6.95  | 0.66 | 2.15 | P | IN  |
| QL00952 | 1,1-Difluoro-5,5-dimethyl-1-(trifluoromethoxy)hexane-2,4-dione                                                                                                                                                                                                                                                                                                                                                                                                                                                                                                                                                                                                                                                                                                                                                                                                      | 61894-06-2                                                                                                                                                                                                                                   | CC(C)(C)C(=O)CC(=O)C(F)(F)OC(F)(F)F                                                                                                                               | -6.23  | 0.65 | 1.88 | P | IN  |
| QL00953 | 1,1,1,2,2,3,3,4,4-Nonafluoro-6-iodo-7,7-dimethyloctane                                                                                                                                                                                                                                                                                                                                                                                                                                                                                                                                                                                                                                                                                                                                                                                                              | 1464148-69-3                                                                                                                                                                                                                                 | CC(C)(C)(I)CC(F)(F)C(F)(F)C(F)(F)C(F)(F)F                                                                                                                         | -6.32  | 0.64 | 2.15 | P | IN  |
| QL00954 | 6-Amino-1,1,1,2,2,3,3-heptafluoro-7,7-dimethyloct-5-en-4-one                                                                                                                                                                                                                                                                                                                                                                                                                                                                                                                                                                                                                                                                                                                                                                                                        | 188838-46-2                                                                                                                                                                                                                                  | CC(C)(C)C(N)=CC(=O)C(F)(F)C(F)(F)C(F)(F)F                                                                                                                         | -7.25  | 0.67 | 2.17 | P | IN  |
| QL00955 | 1,1,1,2,2,3,3-heptafluoro-6-hydroxy-7,7-dimethyloct-5-en-4-one                                                                                                                                                                                                                                                                                                                                                                                                                                                                                                                                                                                                                                                                                                                                                                                                      | 62773-05-1                                                                                                                                                                                                                                   | CC(C)(C)C(O)=CC(=O)C(F)(F)C(F)(F)C(F)(F)F                                                                                                                         | -6.95  | 0.66 | 2.15 | P | IN  |
| QL00956 | 1,4-Bis(1,1-dimethylethyl)-2,3,5,6-tetrafluorobenzene                                                                                                                                                                                                                                                                                                                                                                                                                                                                                                                                                                                                                                                                                                                                                                                                               | 54111-17-0                                                                                                                                                                                                                                   | CC(C)(C)C1=C(F)C(F)=C(C(F)=C1F)C(C)(C)C                                                                                                                           | -6.95  | 0.66 | 2.15 | P | IN  |
| QL00957 | Phenol, 2,2'-[(1R,2R)-1,2-cyclohexanediylbis[(E)-nitrilomethylidyne]]bis[6-(1,1-dimethylethyl)-4-(heptadecafluorooctyl)]-(1Z,4Z,9Z,12E)-2,10-Di-tert-butyl-4,12-bis[heptafluoropropyl]-1,5,9,13-tetraazacyclohexadeca-1,4,9,12-tetraene                                                                                                                                                                                                                                                                                                                                                                                                                                                                                                                                                                                                                             | 417715-98-1                                                                                                                                                                                                                                  | CC(C)(C)C1=CC(=CC(=CC(=NC2CCCC[C@H]2N)=CC2(=O)C(=CC(=C2)C(F)(F)C(F)(F)C(F)(F)C(F)(F)C(F)(F)C(F)(F)C(F)(F)C(C)(C)C=C1O)C(F)(F)C(F)(F)C(F)(F)C(F)(F)C(F)(F)C(F)(F)F | -5.87  | 0.64 | 1.89 | P | IN  |
| QL00958 | 5-tert-Butyl-7-(heptafluoropropyl)-2-phenylpyrazolo[1,5-a]pyrimidine                                                                                                                                                                                                                                                                                                                                                                                                                                                                                                                                                                                                                                                                                                                                                                                                | 925457-51-8                                                                                                                                                                                                                                  | CC(C)(C)C1=NCCCN=C(C)C(=NCCCN=C(C1)C(F)(F)C(F)(F)C(F)(F)C(C)(C)C)C(F)(F)C(F)(F)C(F)(F)F                                                                           | -10.24 | 0.66 | 3.79 | P | OUT |
| QL00959 | 5-(4-tert-Butylphenyl)-N-(2,2,3,3,4,4,4-heptafluorobutyl)-1,2-oxazole-3-carboxamide                                                                                                                                                                                                                                                                                                                                                                                                                                                                                                                                                                                                                                                                                                                                                                                 | 922421-40-7                                                                                                                                                                                                                                  | CC(C)(C)C1ccc(cc1)-c1cc(no1)C(=O)NCC(F)(F)C(F)(F)C(F)(F)F                                                                                                         | -8.08  | 0.64 | 3.05 | P | OUT |
| QL00960 | 1,1,1,2,2,3,3,4-Octafluoro-7,7-dimethyloct-4-ene                                                                                                                                                                                                                                                                                                                                                                                                                                                                                                                                                                                                                                                                                                                                                                                                                    | 90292-33-4                                                                                                                                                                                                                                   | CC(C)(C)CC=C(F)C(F)(F)C(F)(F)C(F)(F)F                                                                                                                             | -6.93  | 0.64 | 2.50 | P | OUT |
| QL00961 | N-tert-Butyl-2,2,3,3,4,4,4-heptafluorobutanamide                                                                                                                                                                                                                                                                                                                                                                                                                                                                                                                                                                                                                                                                                                                                                                                                                    | 99089-22-2                                                                                                                                                                                                                                   | CC(C)(C)NC(=O)C(F)(F)C(F)(F)C(F)(F)F                                                                                                                              | -7.79  | 0.63 | 2.95 | P | OUT |
| QL00962 | tert-Butyl heptafluorobutanoate                                                                                                                                                                                                                                                                                                                                                                                                                                                                                                                                                                                                                                                                                                                                                                                                                                     | 425-24-1                                                                                                                                                                                                                                     | CC(C)(C)OC(=O)C(F)(F)C(F)(F)C(F)(F)F                                                                                                                              | -6.80  | 0.65 | 2.16 | P | IN  |
| QL00963 |                                                                                                                                                                                                                                                                                                                                                                                                                                                                                                                                                                                                                                                                                                                                                                                                                                                                     |                                                                                                                                                                                                                                              |                                                                                                                                                                   | -6.47  | 0.66 | 1.90 | P | IN  |
| QL00964 |                                                                                                                                                                                                                                                                                                                                                                                                                                                                                                                                                                                                                                                                                                                                                                                                                                                                     |                                                                                                                                                                                                                                              |                                                                                                                                                                   | -6.47  | 0.66 | 1.90 | P | IN  |
| QL00965 |                                                                                                                                                                                                                                                                                                                                                                                                                                                                                                                                                                                                                                                                                                                                                                                                                                                                     |                                                                                                                                                                                                                                              |                                                                                                                                                                   | -6.47  | 0.66 | 1.90 | P | IN  |

[illegible]

[illegible]







|         |                                                                                                                                                               |              |                                                                                                                  |
|---------|---------------------------------------------------------------------------------------------------------------------------------------------------------------|--------------|------------------------------------------------------------------------------------------------------------------|
| QL01092 | 4-(2,2,3,3,4,4,5,5,6,6,7,7,8,8,9,9-Heptadecafluorononyl)-2,2-dimethyl-1,3-dioxolane                                                                           | 94159-88-3   | CC1(C)OCC(C(F)(F)C(F)(F)C(F)(F)C(F)(F)C(F)(F)C(F)(F)C(F)(F)C(F)(F)O1                                             |
| QL01093 | 1-Methyl-N-(1,1,2,2,3,3,4,4,4-nonafluorobutane-1-sulfonyl)cyclopentane-1-carboxamide                                                                          | 1440968-23-9 | CC1(CCCCC1C(=O)NS(=O)(=O)C(F)(F)C(F)(F)C(F)(F)C(F)(F)F                                                           |
| QL01094 | 3-[(2,2,3,3,4,4,4-Heptafluorobutoxy)methyl]-3-methyloxetane                                                                                                   | 156294-55-2  | CC1(COCC(F)(F)C(F)(F)C(F)(F)COC1                                                                                 |
| QL01095 | Oxetane, 3-methyl-3-[[[(3,3,4,4,5,5,6,6,6-nonafluorohexyl)oxy]methyl]-                                                                                        | 475678-78-5  | CC1(COCCC(F)(F)C(F)(F)C(F)(F)C(F)(F)COC1                                                                         |
| QL01096 | 4-(2,2,3,3,4,4,4-Heptafluorobutoxy)-1,2-dimethylpyridin-1-ium                                                                                                 | 140160-19-6  | CC1=[N+](C)C=CC(OCC(F)(F)C(F)(F)C(F)(F)F)=C1                                                                     |
| QL01097 | 3-(Heptafluoropropyl)-5-methyl-4-nitro-1H-pyrazole                                                                                                            | 82633-69-0   | CC1=C(C(=NN1)C(F)(F)C(F)(F)C(F)(F)[N+](O-)]C(F)(F)F                                                              |
| QL01098 | 5-(Heptafluoropropyl)-6-methylpyrimidine-2,4(1H,3H)-dione                                                                                                     | 145663-05-4  | CC1=C(C(=O)NC(=O)N1)C(F)(F)C(F)(F)C(F)(F)F                                                                       |
| QL01099 | 3,3'-(Perfluoro-1-cyclopentene-1,2-diyl)bis(2,5-dimethylthiophene)                                                                                            | 190394-25-3  | CC1=CC(=C(C)S1)C1=C(C2=C(C)SC(C)=C2)C(F)(F)C(F)(F)C1(F)F                                                         |
| QL01100 | 3-(Perfluoro-1-hexyl)-5-(methyl)pyrazole                                                                                                                      | 129257-23-4  | CC1=CC(=NN1)C(F)(F)C(F)(F)C(F)(F)C(F)(F)C(F)(F)F                                                                 |
| QL01101 | 3-(Perfluoropentyl)-5-methylpyrazole                                                                                                                          | 82633-43-0   | CC1=CC(=NN1)C(F)(F)C(F)(F)C(F)(F)C(F)(F)C(F)(F)F                                                                 |
| QL01102 | 3-(Heptafluoropropyl)-5-methyl-1H-pyrazole                                                                                                                    | 75823-64-2   | CC1=CC(=NN1)C(F)(F)C(F)(F)C(F)(F)F                                                                               |
| QL01103 | Diphenyl(2,4,6-trimethylphenyl)sulfonium perfluoro-1-octanesulfonate                                                                                          | 258341-99-0  | CC1=CC(C)=C([S+](C2=CC=CC=C2)C2=CC=CC=C2)C(C)=C1.[O-]S(=O)(=O)C(F)(F)C(F)(F)C(F)(F)C(F)(F)C(F)(F)C(F)(F)C(F)(F)F |
| QL01104 | 2,2,3,3,4,4,5,5-Nonafluoro-1-(4-methylphenyl)pentan-1-one                                                                                                     | 647-60-9     | CC1=CC=C(C=C1)C(=O)C(F)(F)C(F)(F)C(F)(F)C(F)(F)F                                                                 |
| QL01105 | 2,2,3,3,4,4,4-Heptafluoro-1-(4-methylphenyl)butan-1-one                                                                                                       | 559-92-2     | CC1=CC=C(C=C1)C(=O)C(F)(F)C(F)(F)C(F)(F)F                                                                        |
| QL01106 | 4-(Heptafluoroisopropyl)toluene                                                                                                                               | 2396-26-1    | CC1=CC=C(C=C1)C(F)(C(F)(F)F)C(F)(F)F                                                                             |
| QL01108 | 2,2,3,3,4,4,5,5,6,6,7,7,8,8-Pentadecafluorooctyl 4-methylbenzene-1-sulfonate                                                                                  | 24962-65-0   | CC1=CC=C(C=C1)S(=O)(=O)OCC(F)(F)C(F)(F)C(F)(F)C(F)(F)C(F)(F)C(F)(F)C(F)(F)F                                      |
| QL01109 | 1H,1H,7H-Perfluoroheptyl 4-methylbenzenesulfonate                                                                                                             | 424-16-8     | CC1=CC=C(C=C1)S(=O)(=O)OCC(F)(F)C(F)(F)C(F)(F)C(F)(F)C(F)(F)C(F)(F)F                                             |
| QL01110 | 1h,1h-perfluorohexyl p-toluenesulfonate                                                                                                                       | 355-77-1     | CC1=CC=C(C=C1)S(=O)(=O)OCC(F)(F)C(F)(F)C(F)(F)C(F)(F)C(F)(F)F                                                    |
| QL01111 | 1h,1h-nonafluoropentyl p-toluenesulfonate                                                                                                                     | 883499-79-4  | CC1=CC=C(C=C1)S(=O)(=O)OCC(F)(F)C(F)(F)C(F)(F)C(F)(F)F                                                           |
| QL01112 | 2,2,3,3,4,4-Heptafluorobutyl 4-methylbenzene-1-sulfonate                                                                                                      | 312-66-3     | CC1=CC=C(C=C1)S(=O)(=O)OCC(F)(F)C(F)(F)C(F)(F)F                                                                  |
| QL01113 | 2,2,3,3,3-Pentafluoropropyl 4-methylbenzene-1-sulfonate                                                                                                       | 565-42-4     | CC1=CC=C(C=C1)S(=O)(=O)OCC(F)(F)C(F)(F)F                                                                         |
| QL01114 | 1,3-Diethyl-2-methyl-5-[(perfluorohexyl)sulfonyl]-1H-benzimidazolium 4-methylbenzenesulfonate                                                                 | 76848-68-5   | CC1=CC=C(C=C1)S(O)(=O)=O.CCN1C(C)[NH+](CC)C2=C1C=CC(=C2)S(=O)(=O)C(F)(F)C(F)(F)C(F)(F)C(F)(F)C(F)(F)F            |
| QL01115 | 1-Methyl-2-(nonafluorobutyl)benzene                                                                                                                           | 93697-09-7   | CC1=CC=CC=C1C(F)(F)C(F)(F)C(F)(F)C(F)(F)F                                                                        |
| QL01116 | (2-methylphenyl) 1,1,2,2,3,3,4,4-nonafluorobutane-1-sulfonate                                                                                                 | 42096-33-3   | CC1=CC=CC=C1OS(=O)(=O)C(F)(F)C(F)(F)C(F)(F)C(F)(F)F                                                              |
| QL01117 | 6-Methyl-2-(undecafluoropentyl)-1,3-benzoxazole (4-Bromophenyl)[5-(difluoro(trifluoromethoxy)methyl]-5-hydroxy-3-methyl-4,5-dihydro-1H-pyrazol-1-yl)methanone | 93416-26-3   | CC1=CC2=C(C=C1)N=C(O2)C(F)(F)C(F)(F)C(F)(F)C(F)(F)C(F)(F)F                                                       |
| QL01118 | Orthobutyric acid, heptafluoro-, cyclic ester with 2-(hydroxymethyl)-2-methyl-1,3-propanediol (11)                                                            | 722470-55-5  | CC1=NN(C(=O)C2ccc(Br)cc2)C(O)(C1)C(F)(F)OC(F)(F)F                                                                |
| QL01119 |                                                                                                                                                               | 31185-67-8   | CC12COC(OC1)(OC2)C(F)(F)C(F)(F)C(F)(F)F                                                                          |
| QL01120 | 4-(1,1,1,2,3,3,3-Heptafluoropropan-2-yl)-2-methyl-3-(2-methylpropane-2-sulfonyl)benzoic acid                                                                  | 1355554-59-4 | Cc1c(ccc(c1S(=O)(=O)C(C)(C)C)C(F)(F)C(F)(F)C(F)(F)C(O)=O                                                         |
| QL01121 | 4-(1,1,1,2,3,3,3-Heptafluoropropan-2-yl)-2-methyl-3-(2-methylpropane-2-sulfinyl)benzoic acid                                                                  | 1355554-39-0 | Cc1c(ccc(c1S(=O)C(C)(C)C)C(F)(F)C(F)(F)C(F)(F)C(O)=O                                                             |
| QL01122 | 4-(1,1,1,2,3,3,3-Heptafluoropropan-2-yl)-3-(methanesulfonyl)-2-methylbenzoic acid                                                                             | 1355554-41-4 | Cc1c(ccc(c1S(C)(=O)=O)C(F)(C(F)(F)C(F)(F)C(F)(F)C(O)=O                                                           |
| QL01123 | 4-(1,1,1,2,3,3,3-Heptafluoropropan-2-yl)-3-(methanesulfinyl)-2-methylbenzoic acid                                                                             | 1355554-19-6 | Cc1c(ccc(c1S(C)=O)C(F)(C(F)(F)C(F)(F)C(F)(F)C(O)=O                                                               |
| QL01124 | 3-(tert-Butylsulfonyl)-4-(1,1,1,2,3,3,3-heptafluoropropan-2-yl)-2-methylbenzoic acid                                                                          | 1355554-16-3 | Cc1c(ccc(c1SC(C)(C)C)C(F)(F)C(F)(F)C(F)(F)C(O)=O                                                                 |
| QL01125 | 3-Methyl-2-(nonafluorobutyl)-1H-indole                                                                                                                        | 1622133-36-1 | Cc1c(Nc2cccc12)C(F)(F)C(F)(F)C(F)(F)C(F)(F)F                                                                     |

|       |      |      |   |     |
|-------|------|------|---|-----|
| -8.53 | 0.68 | 2.75 | P | IN  |
| -7.54 | 0.66 | 2.45 | P | IN  |
| -6.62 | 0.65 | 2.20 | P | IN  |
| -7.20 | 0.65 | 2.48 | P | IN  |
| -6.83 | 0.64 | 2.42 | P | IN  |
| -6.04 | 0.65 | 1.90 | P | IN  |
| -6.47 | 0.65 | 2.12 | P | IN  |
| -6.21 | 0.64 | 2.07 | P | IN  |
| -7.73 | 0.67 | 2.45 | P | IN  |
| -7.20 | 0.66 | 2.24 | P | IN  |
| -6.19 | 0.65 | 1.92 | P | IN  |
| -6.98 | 0.64 | 2.45 | P | IN  |
| -7.21 | 0.65 | 2.46 | P | IN  |
| -6.61 | 0.64 | 2.27 | P | IN  |
| -5.86 | 0.64 | 1.90 | P | IN  |
| -8.56 | 0.66 | 2.95 | P | IN  |
| -8.07 | 0.65 | 2.86 | P | IN  |
| -7.87 | 0.65 | 2.71 | P | IN  |
| -7.66 | 0.65 | 2.68 | P | IN  |
| -7.19 | 0.64 | 2.53 | P | IN  |
| -6.84 | 0.63 | 2.48 | P | OUT |
| -8.96 | 0.64 | 3.46 | P | OUT |
| -6.64 | 0.65 | 2.17 | P | IN  |
| -7.28 | 0.65 | 2.45 | P | IN  |
| -7.57 | 0.66 | 2.53 | P | IN  |
| -6.50 | 0.62 | 2.46 | P | OUT |
| -7.13 | 0.67 | 2.17 | P | IN  |
| -6.70 | 0.65 | 2.11 | P | IN  |
| -6.46 | 0.65 | 2.12 | P | IN  |
| -6.63 | 0.65 | 2.19 | P | IN  |
| -6.36 | 0.64 | 2.19 | P | IN  |
| -6.33 | 0.64 | 2.11 | P | IN  |
| -6.78 | 0.65 | 2.25 | P | IN  |

|         |                                                                                                                     |              |                                                                                    |       |      |      |   |     |
|---------|---------------------------------------------------------------------------------------------------------------------|--------------|------------------------------------------------------------------------------------|-------|------|------|---|-----|
| QL01126 | 2-(Heptafluoropropyl)-3-methyl-1H-indole                                                                            | 1030606-42-8 | Cc1c(Nc2ccccc12)C(F)(F)C(F)(F)C(F)(F)F                                             | -6.37 | 0.64 | 2.15 | P | IN  |
| QL01127 | 5-Methyl-6-([3,3,4,4,5,5,6,6,7,7,8,8,8-tridecafluorooctyl)sulfonyl]hexahydro-4,7-methano-2-benzofuran-1,3-dione     | 94413-32-8   | CC1C2CC(C1SCCC(F)(F)C(F)(F)C(F)(F)C(F)(F)C(F)(F)C(F)(F)C1C2C(=O)OC1=O              | -8.26 | 0.66 | 2.89 | P | IN  |
| QL01128 | 6-([4,6-Dimethylpyrimidin-2-yl)sulfonyl]-3-(heptafluoropropyl)[1,2,4]triazolo[4,3-b]pyridazine                      | 351346-36-6  | Cc1cc(C)nc(Sc2ccc3nnc(n3n2)C(F)(F)C(F)(F)C(F)(F)F)n1                               | -7.07 | 0.63 | 2.68 | P | OUT |
| QL01129 | 2-Bromo-4-(1,1,1,2,3,3,3-heptafluoropropan-2-yl)-6-methylaniline                                                    | 1770825-71-2 | Cc1cc(cc(Br)c1N)C(F)(C(F)(F)F)C(F)(F)F                                             | -6.09 | 0.65 | 1.90 | P | IN  |
| QL01130 | 2-Bromo-5-(1,1,1,2,3,3,3-heptafluoropropan-2-yl)-1,3-dimethylbenzene                                                | 353272-55-6  | Cc1cc(cc(C)c1Br)C(F)(C(F)(F)F)C(F)(F)F                                             | -6.09 | 0.65 | 1.90 | P | IN  |
| QL01131 | 4-(1,1,1,2,3,3,3-Heptafluoropropan-2-yl)-2,6-dimethylbenzaldehyde                                                   | 1771743-29-3 | Cc1cc(cc(C)c1C=O)C(F)(C(F)(F)C(F)(F)F                                              | -6.32 | 0.63 | 2.20 | P | IN  |
| QL01132 | 4-(1,1,1,2,3,3,3-Heptafluoropropan-2-yl)-2,6-dimethylaniline                                                        | 273735-43-6  | Cc1cc(cc(C)c1N)C(F)(C(F)(F)F)C(F)(F)F                                              | -6.09 | 0.65 | 1.90 | P | IN  |
| QL01133 | 3-Benzamido-2,6-difluoro-N-[4-(1,1,1,2,3,3,3-heptafluoropropan-2-yl)-2,6-dimethylphenyl]benzamide                   | 862133-36-6  | Cc1cc(cc(C)c1NC(=O)c1c(F)ccc(NC(=O)c2ccccc2)c1F)C(F)(C(F)(F)C(F)(F)F               | -7.60 | 0.62 | 3.09 | P | OUT |
| QL01134 | 5-Benzamido-2,4-dibromo-N-[4-(1,1,1,2,3,3,3-heptafluoropropan-2-yl)-2,6-dimethylphenyl]benzamide                    | 862133-37-7  | Cc1cc(cc(C)c1NC(=O)c1cc(NC(=O)c2ccccc2)c(Br)cc1Br)C(F)(C(F)(F)C(F)(F)F             | -7.60 | 0.62 | 3.08 | P | OUT |
| QL01135 | 2,4-Difluoro-N-(2-fluoro-5-([4-(1,1,1,2,3,3,3-heptafluoropropan-2-yl)-2,6-dimethylphenyl]carbamoyl)phenyl)benzamide | 862133-29-7  | Cc1cc(cc(C)c1NC(=O)c1ccc(F)c(NC(=O)c2ccc(F)cc2F)c1)C(F)(C(F)(F)C(F)(F)F            | -7.93 | 0.62 | 3.20 | P | OUT |
| QL01136 | 2,3,4,5,6-Pentafluoro-N-(3-([4-(1,1,1,2,3,3,3-heptafluoropropan-2-yl)-2,6-dimethylphenyl]carbamoyl)phenyl)benzamide | 862130-96-9  | Cc1cc(cc(C)c1NC(=O)c1cccc(NC(=O)c2c(F)c(F)c(F)c2F)c1)C(F)(C(F)(F)C(F)(F)F          | -7.99 | 0.63 | 3.18 | P | OUT |
| QL01137 | 2,3,6-Trifluoro-N-(3-([4-(1,1,1,2,3,3,3-heptafluoropropan-2-yl)-2,6-dimethylphenyl]carbamoyl)phenyl)benzamide       | 862130-95-8  | Cc1cc(cc(C)c1NC(=O)c1cccc(NC(=O)c2c(F)ccc(F)c2F)c1)C(F)(C(F)(F)C(F)(F)F            | -7.60 | 0.62 | 3.04 | P | OUT |
| QL01138 | 2,5-Difluoro-N-(3-([4-(1,1,1,2,3,3,3-heptafluoropropan-2-yl)-2,6-dimethylphenyl]carbamoyl)phenyl)benzamide          | 862130-67-4  | Cc1cc(cc(C)c1NC(=O)c1cccc(NC(=O)c2cc(F)ccc2F)c1)C(F)(C(F)(F)C(F)(F)F               | -7.56 | 0.62 | 3.05 | P | OUT |
| QL01139 | 4-Chloro-N-(3-([4-(1,1,1,2,3,3,3-heptafluoropropan-2-yl)-2,6-dimethylphenyl]carbamoyl)phenyl)-2-nitrobenzamide      | 862130-91-4  | Cc1cc(cc(C)c1NC(=O)c1cccc(NC(=O)c2ccc(Cl)cc2[N+](=[O-])=O)c1)C(F)(C(F)(F)C(F)(F)F  | -7.78 | 0.62 | 3.18 | P | OUT |
| QL01140 | 3-(4-Chloro-2-nitrobenzamido)-2-fluoro-N-[4-(1,1,1,2,3,3,3-heptafluoropropan-2-yl)-2,6-dimethylphenyl]benzamide     | 862133-18-4  | Cc1cc(cc(C)c1NC(=O)c1cccc(NC(=O)c2ccc(Cl)cc2[N+](=[O-])=O)c1F)C(F)(C(F)(F)C(F)(F)F | -7.83 | 0.62 | 3.18 | P | OUT |
| QL01141 | 2,4-Dichloro-N-(3-([4-(1,1,1,2,3,3,3-heptafluoropropan-2-yl)-2,6-dimethylphenyl]carbamoyl)phenyl)benzamide          | 862130-69-6  | Cc1cc(cc(C)c1NC(=O)c1cccc(NC(=O)c2ccc(Cl)cc2Cl)c1)C(F)(C(F)(F)C(F)(F)F             | -7.83 | 0.62 | 3.19 | P | OUT |
| QL01142 | 4-Chloro-2-fluoro-N-(3-([4-(1,1,1,2,3,3,3-heptafluoropropan-2-yl)-2,6-dimethylphenyl]carbamoyl)phenyl)benzamide     | 862130-90-3  | Cc1cc(cc(C)c1NC(=O)c1cccc(NC(=O)c2ccc(Cl)cc2F)c1)C(F)(C(F)(F)C(F)(F)F              | -7.83 | 0.62 | 3.19 | P | OUT |
| QL01143 | 3-(4-Chloro-2-fluorobenzamido)-2-fluoro-N-[4-(1,1,1,2,3,3,3-heptafluoropropan-2-yl)-2,6-dimethylphenyl]benzamide    | 862133-16-2  | Cc1cc(cc(C)c1NC(=O)c1cccc(NC(=O)c2ccc(Cl)cc2F)c1F)C(F)(C(F)(F)C(F)(F)F             | -7.88 | 0.62 | 3.19 | P | OUT |
| QL01144 | 2-Fluoro-3-(4-fluoro-2-nitrobenzamido)-N-[4-(1,1,1,2,3,3,3-heptafluoropropan-2-yl)-2,6-dimethylphenyl]benzamide     | 862133-14-0  | Cc1cc(cc(C)c1NC(=O)c1cccc(NC(=O)c2ccc(F)cc2[N+](=[O-])=O)c1F)C(F)(C(F)(F)C(F)(F)F  | -7.83 | 0.62 | 3.18 | P | OUT |
| QL01145 | 2-Chloro-4-fluoro-N-(3-([4-(1,1,1,2,3,3,3-heptafluoropropan-2-yl)-2,6-dimethylphenyl]carbamoyl)phenyl)benzamide     | 862130-87-8  | Cc1cc(cc(C)c1NC(=O)c1cccc(NC(=O)c2ccc(F)cc2Cl)c1)C(F)(C(F)(F)C(F)(F)F              | -7.83 | 0.62 | 3.19 | P | OUT |
| QL01146 | 3-(2-Chloro-4-fluorobenzamido)-2-fluoro-N-[4-(1,1,1,2,3,3,3-heptafluoropropan-2-yl)-2,6-dimethylphenyl]benzamide    | 862133-15-1  | Cc1cc(cc(C)c1NC(=O)c1cccc(NC(=O)c2ccc(F)cc2Cl)c1F)C(F)(C(F)(F)C(F)(F)F             | -7.88 | 0.62 | 3.19 | P | OUT |
| QL01147 | 2,4-Difluoro-N-(3-([4-(1,1,1,2,3,3,3-heptafluoropropan-2-yl)-2,6-dimethylphenyl]carbamoyl)phenyl)benzamide          | 862130-66-3  | Cc1cc(cc(C)c1NC(=O)c1cccc(NC(=O)c2ccc(F)cc2F)c1)C(F)(C(F)(F)C(F)(F)F               | -7.83 | 0.62 | 3.19 | P | OUT |
| QL01148 | 3-methyl-4-(2,2,3,3,4,4,5,5,5-nonafluoropentyl)cyclopentane-1,1-dicarboxylic Acid                                   | 20116-32-9   | CC1CC(CC1CC(F)(F)C(F)(F)C(F)(F)C(F)(F)C(O)=O)C(O)=O                                | -7.23 | 0.65 | 2.38 | P | IN  |
| QL01149 | 4-(1,1,1,2,3,3,3-Heptafluoropropan-2-yl)-2-methyl-1-nitrobenzene                                                    | 238098-38-9  | Cc1cc(ccc1[N+](=[O-])=O)C(F)(C(F)(F)C(F)(F)F                                       | -6.35 | 0.64 | 2.15 | P | IN  |





[illegible]

|         |                                                                                                                         |              |                                                                                               |  |       |      |      |   |     |
|---------|-------------------------------------------------------------------------------------------------------------------------|--------------|-----------------------------------------------------------------------------------------------|--|-------|------|------|---|-----|
| QL01250 | Tetrabutylphosphonium perfluorobutanesulfonate                                                                          | 220689-12-3  | CCCC[PH+](CCCC)(CCCC)CCCC.[O-]S(=O)(=O)C(F)(F)C(F)(F)C(F)(F)C(F)(F)F                          |  | -5.41 | 0.59 | 2.32 | P | OUT |
| QL01251 | 1-(Butylselanyl)-2,2,3,3,4,4,4-heptafluorobutan-1-ol                                                                    | 1092379-04-8 | CCCC[Se]C(O)C(F)(F)C(F)C(F)F                                                                  |  | -6.02 | 0.62 | 2.28 | P | OUT |
| QL01252 | 1,1,1,2,2,3,3-Heptafluorooct-4-ene<br>2-Ethylhexyl 2,3,3,3-tetrafluoro-2-(heptafluoropropoxy)propanoate                 | 2707-72-4    | CCCC=CC(F)(F)C(F)C(F)F                                                                        |  | -5.83 | 0.62 | 2.17 | P | OUT |
| QL01253 | 2-Butyl-5,6,6,7,7,8,8-octafluorooct-4-enoic acid                                                                        | 340034-61-9  | CCCCC(CC)COC(=O)C(F)(OC(F)(F)C(F)(F)C(F)(F)C(F)(F)F                                           |  | -7.05 | 0.62 | 2.74 | P | OUT |
| QL01254 | 1,1,1,2,2,3,3,4,4,5,5,6,6,7,7,8,8,9,9,10,10,11,11,12,12-Pentacosafluorohexadecane                                       | 90292-29-8   | CCCCC(CC=C(F)C(F)(F)C(F)(F)C(F)(F)C(O)=O                                                      |  | -6.31 | 0.61 | 2.48 | P | OUT |
| QL01255 | 1,1,1,2,2,3,3,4,4,5,5,6,6,7,7,8,8,9,9,10,10-10-Henicosafluorotetradecane                                                | 89109-69-3   | CCCCC(F)(F)C(F)C(F)(F)C(F)(F)C(F)(F)C(F)(F)C(F)(F)C(F)(F)C(F)(F)C(F)(F)F                      |  | -9.13 | 0.68 | 3.06 | P | OUT |
| QL01256 | 1,1,1,2,2,3,3,4,4,5,5,6,6,7,7,8,8-Heptafluorododecane                                                                   | 1244062-17-6 | CCCCC(F)(F)C(F)(F)C(F)(F)C(F)(F)C(F)(F)C(F)(F)C(F)(F)C(F)(F)F                                 |  | -8.66 | 0.67 | 2.89 | P | IN  |
| QL01257 | 1,1,1,2,2,3,3,4,4,5,5,6,6-Tridecafluorodecane                                                                           | 182130-12-7  | CCCCC(F)(F)C(F)C(F)C(F)(F)C(F)(F)C(F)(F)C(F)(F)C(F)(F)F                                       |  | -8.10 | 0.66 | 2.68 | P | IN  |
| QL01258 | 1,1,1,2,2,3,3,4,4,5,5,6,6-Tridecafluorodecane                                                                           | 154478-86-1  | CCCCC(F)(F)C(F)(F)C(F)(F)C(F)(F)C(F)(F)C(F)(F)C(F)(F)F                                        |  | -7.41 | 0.66 | 2.46 | P | IN  |
| QL01259 | 1,1,1,2,2,3,3,4,4-Nonafluorooctane                                                                                      | 253342-14-2  | CCCCC(F)(F)C(F)C(F)C(F)C(F)F                                                                  |  | -6.48 | 0.64 | 2.21 | P | IN  |
| QL01260 | 1,1,1,2,2,3,3-Heptafluoroheptane                                                                                        | 152076-35-2  | CCCCC(F)(F)C(F)C(F)F                                                                          |  | -5.63 | 0.63 | 1.95 | P | OUT |
| QL01261 | (5Z)-1,1,1,2,2,3,3,4,4-Nonafluoro-6-iododec-5-ene                                                                       | 107831-93-6  | CCCCC(I)=CC(F)(F)C(F)C(F)(F)C(F)F                                                             |  | -6.66 | 0.63 | 2.44 | P | OUT |
| QL01262 | 1,1,1,2,2,3,3-Heptafluoro-6-iodo-4,4-bis(trifluoromethyl)decane                                                         | 123629-50-5  | CCCCC(I)CC(C(F)F)(C(F)F)C(F)C(F)(F)C(F)(F)C(F)F                                               |  | -6.66 | 0.64 | 2.28 | P | IN  |
| QL01263 | 1,1,1,2-Tetrafluoro-4-iodo-2-(trifluoromethyl)octane                                                                    | 161094-94-6  | CCCCC(I)CC(F)(C(F)F)C(F)C(F)F                                                                 |  | -5.52 | 0.62 | 2.06 | P | OUT |
| QL01264 | 1,1,1,2,2,3,3,4,4,5,5,6,6,7,7,8,8,9,9,10,10-Henicosafluoro-12-iodohexadecane                                            | 129838-38-6  | CCCCC(I)CC(F)(F)C(F)C(F)C(F)(F)C(F)(F)C(F)(F)C(F)(F)C(F)(F)C(F)(F)C(F)(F)F                    |  | -8.81 | 0.66 | 3.07 | P | OUT |
| QL01265 | 1,1,1,2,2,3,3,4,4,5,5,6,6,7,7,8,8-Heptafluoro-10-iodotetradecane                                                        | 92835-74-0   | CCCCC(I)CC(F)(F)C(F)C(F)C(F)C(F)C(F)(F)C(F)(F)C(F)(F)F                                        |  | -8.29 | 0.66 | 2.90 | P | IN  |
| QL01266 | 1,1,1,2,2,3,3,4,4,5,5,6,6-Tridecafluoro-8-iodododecane                                                                  | 120695-82-1  | CCCCC(I)CC(F)(F)C(F)(F)C(F)(F)C(F)(F)C(F)(F)C(F)(F)F                                          |  | -7.64 | 0.65 | 2.72 | P | IN  |
| QL01267 | 1,1,1,2,2,3,3,4,4-Nonafluoro-6-iododecane                                                                               | 40735-32-8   | CCCCC(I)CC(F)(F)C(F)(F)C(F)(F)C(F)F                                                           |  | -6.66 | 0.63 | 2.44 | P | OUT |
| QL01268 | 1,1,1,2,2,3,3-heptafluoro-5-iodononane                                                                                  | 755-48-6     | CCCCC(I)CC(F)(F)C(F)C(F)F                                                                     |  | -6.00 | 0.62 | 2.28 | P | OUT |
| QL01269 | Hexanamide, 2-[2,4-bis(1,1-dimethylpropyl)phenoxy]-N-[3-hydroxy-4-[(octafluoro-1-oxopentyl)amino]phenyl]-(9CI)          | 83003-52-5   | CCCCC(OC1=C(C=C(C=C1)C(C)C)CC(C)C(C)C)CC(C(=O)NC1=CC(O)=C(NC(=O)C(F)(F)C(F)C(F)C(F)C(F)F)C=C1 |  | -8.06 | 0.61 | 3.39 | P | OUT |
| QL01270 | Hexanamide, 2-[2,4-bis(1,1-dimethylpropyl)phenoxy]-N-[4-[(2,2,3,3,4,4,4-heptafluoro-1-oxobutyl)amino]-3-hydroxyphenyl]- | 2923-93-5    | CCCCC(OC1ccc(cc1C(C)C)CC(C)C(C)C)CC(C(=O)Nc1ccc(NC(=O)C(F)(F)C(F)C(F)C(F)F)c(O)c1             |  | -8.01 | 0.61 | 3.35 | P | OUT |
| QL01271 | N,N,N-Tripropylpentan-1-aminium heptafluorooctane-1-sulfonate                                                           | 56773-56-9   | CCCCC[N+](CCC)(CCC)CCC.[O-]S(=O)(=O)C(F)(F)C(F)(F)C(F)(F)C(F)(F)C(F)(F)C(F)(F)F               |  | -6.86 | 0.63 | 2.59 | P | OUT |
| QL01272 | N,N,N-Tripropylpentan-1-aminium nonafluorobutane-1-sulfonate                                                            | 56773-55-8   | CCCCC[N+](CCC)(CCC)CCC.[O-]S(=O)(=O)C(F)(F)C(F)(F)C(F)(F)C(F)(F)F                             |  | -5.62 | 0.60 | 2.35 | P | OUT |
| QL01273 | (5E)-7,7,8,8,9,9,10,10,11,11,12,12,13,13,14,14,14-Heptafluorotetradec-5-ene                                             | 210491-04-6  | CCCCC=CC(F)(F)C(F)(F)C(F)(F)C(F)(F)C(F)(F)C(F)(F)C(F)(F)F                                     |  | -8.24 | 0.65 | 2.91 | P | IN  |
| QL01274 | 7,7,8,8,9,9,10,10,11,11,12,12,13,13,13-Pentadecafluorotridec-5-ene                                                      | 52717-05-2   | CCCCC=CC(F)(F)C(F)(F)C(F)(F)C(F)(F)C(F)(F)C(F)(F)F                                            |  | -7.81 | 0.65 | 2.75 | P | IN  |
| QL01275 | (5E)-1,1,1,2,2,3,3,4,4-Nonafluorodec-5-ene                                                                              | 131294-67-2  | CCCCC=CC(F)(F)C(F)(F)C(F)(F)C(F)(F)F                                                          |  | -6.57 | 0.63 | 2.46 | P | OUT |
| QL01276 | 1,1,1,2,2,3,3-heptafluoronon-4-ene                                                                                      | 5            |                                                                                               |  |       |      |      |   |     |





|         |                                                                                                                                     |              |                                                                                                                                |       |      |      |   |     |
|---------|-------------------------------------------------------------------------------------------------------------------------------------|--------------|--------------------------------------------------------------------------------------------------------------------------------|-------|------|------|---|-----|
| QL01324 | 1,1,1,2,2,3,3,4,4,5,5,6,6,7,7-Pentadecafluorotetradecane                                                                            | 38787-57-4   | CCCCCCCC(F)(F)C(F)(F)C(F)(F)C(F)(F)C(F)(F)C(F)(F)F                                                                             | -8.01 | 0.64 | 2.93 | P | OUT |
| QL01325 | 1,1,1,2,2,3,3,4,4,5,5,6,6-Tridecafluorotridecane                                                                                    | 1835249-87-0 | CCCCCCCC(F)(F)C(F)(F)C(F)(F)C(F)(F)C(F)(F)C(F)(F)F                                                                             | -7.54 | 0.64 | 2.78 | P | OUT |
| QL01326 | 1,1,1,2,2,3,3,4,4-Nonafluoroundecane                                                                                                | 1190430-22-8 | CCCCCCCC(F)(F)C(F)(F)C(F)(F)C(F)(F)F                                                                                           | -6.52 | 0.62 | 2.52 | P | OUT |
| QL01327 | 1,1,1,2,2,3,3,4,4,5,5,6,6,7,7,8,8,9,9,10,10-Henicosafluoro-12-iodononadecane                                                        | 129838-41-1  | CCCCCCCC(I)CC(F)(F)C(F)(F)C(F)(F)C(F)(F)C(F)(F)C(F)(F)C(F)(F)C(F)(F)C(F)(F)F                                                   | -8.89 | 0.65 | 3.28 | P | OUT |
| QL01328 | 1,1,1,2,2,3,3,4,4-Nonafluorododecan-5-ol                                                                                            | 131294-52-5  | CCCCCCCC(O)C(F)(F)C(F)(F)C(F)(F)C(F)(F)F                                                                                       | -6.85 | 0.62 | 2.70 | P | OUT |
| QL01329 | N,N,N-Trimethyloctan-1-aminium pentadecafluorooctanoate                                                                             | 927835-01-6  | CCCCCCCC[N+](C)(C)C.[O-]C(=O)C(F)(F)C(F)(F)C(F)(F)C(F)(F)C(F)(F)C(F)(F)C(F)(F)F                                                | -6.50 | 0.64 | 2.28 | P | IN  |
| QL01330 | 1,1,1,2,2,3,3,4,4,5,5,6,6-Tridecafluoropentadec-7-ene                                                                               | 1980786-99-9 | CCCCCCCC=CC(F)(F)C(F)(F)C(F)(F)C(F)(F)C(F)(F)C(F)(F)F                                                                          | -7.60 | 0.63 | 2.95 | P | OUT |
| QL01331 | 1,1,1,2,2,3,3,4,4,5,5,6,6,7,7,8,8,9,9,10,11,11,12,12-Pentacosafluorocosane                                                          | 90499-31-3   | CCCCCCCC(F)(F)C(F)(F)C(F)(F)C(F)(F)C(F)(F)C(F)(F)C(F)(F)C(F)(F)C(F)(F)C(F)(F)C(F)(F)C(F)(F)C(F)(F)F                            | -9.32 | 0.66 | 3.38 | P | OUT |
| QL01332 | 1,1,1,2,2,3,3,4,4,5,5,6,6,7,7,8,8,9,9,10,10-Henicosafluorooctadecane                                                                | 93454-70-7   | CCCCCCCC(F)(F)C(F)(F)C(F)(F)C(F)(F)C(F)(F)C(F)(F)C(F)(F)C(F)(F)C(F)(F)C(F)(F)F                                                 | -8.89 | 0.65 | 3.25 | P | OUT |
| QL01333 | 1,1,1,2,2,3,3,4,4-Nonafluorododecane                                                                                                | 69125-79-7   | CCCCCCCC(F)(F)C(F)(F)C(F)(F)C(F)(F)F                                                                                           | -6.67 | 0.61 | 2.68 | P | OUT |
| QL01334 | 1,1,1,2,2,3,3-Heptafluoroundecane                                                                                                   | 1190430-20-6 | CCCCCCCC(F)(F)C(F)(F)C(F)(F)F                                                                                                  | -5.93 | 0.60 | 2.50 | P | OUT |
| QL01335 | 1,1,1,2,2,3,3,4,4,5,5,6,6,7,7,8,8,9,9,10,10-Henicosafluoro-12-iodocosane                                                            | 121633-31-6  | CCCCCCCC(I)CC(F)(F)C(F)(F)C(F)(F)C(F)(F)C(F)(F)C(F)(F)C(F)(F)C(F)(F)C(F)(F)C(F)(F)F                                            | -9.03 | 0.65 | 3.40 | P | OUT |
| QL01336 | 1,1,1,2,2,3,3,4,4,5,5,6,6,7,7,8-Heptadecafluoro-10-iodooctadecane                                                                   | 176979-17-2  | CCCCCCCC(I)CC(F)(F)C(F)(F)C(F)(F)C(F)(F)C(F)(F)C(F)(F)C(F)(F)F                                                                 | -8.46 | 0.64 | 3.24 | P | OUT |
| QL01337 | 1,1,1,2,2,3,3,4,4,5,5,6,6-Tridecafluoro-8-iodohexadecane                                                                            | 207122-00-7  | CCCCCCCC(I)CC(F)(F)C(F)(F)C(F)(F)C(F)(F)C(F)(F)C(F)(F)F                                                                        | -7.82 | 0.63 | 3.08 | P | OUT |
| QL01338 | (Z)-Octadec-9-enyl 5-(((2-(((perfluorooctyl)sulfonyl)methylamino)ethoxy)carbonyl)amino)-o-tolyl)carbamate                           | 94313-84-5   | CCCCCCCC=C/CCCCCCCCOC(=O)NC1=CC(NC(=O)OCCN(C)S(=O)(=O)C(F)(F)C(F)(F)C(F)(F)C(F)(F)C(F)(F)C(F)(F)C(F)(F)C(F)(F)C(F)(F)F)=CC=C1C | -9.58 | 0.61 | 4.27 | P | OUT |
| QL01339 | (9E)-1,1,1,2,2,3,3,4,4,5,5,6,6,7,7,8,8-Heptadecafluorooctadec-9-ene                                                                 | 113999-61-4  | CCCCCCCC=CC(F)(F)C(F)(F)C(F)(F)C(F)(F)C(F)(F)C(F)(F)C(F)(F)C(F)(F)F                                                            | -8.42 | 0.64 | 3.24 | P | OUT |
| QL01340 | 1,1,1,2,2,3,3,4,4,5,5,6,6,7,7-Pentadecafluoroheptadec-8-ene                                                                         | 52717-06-3   | CCCCCCCC=CC(F)(F)C(F)(F)C(F)(F)C(F)(F)C(F)(F)C(F)(F)F                                                                          | -8.02 | 0.63 | 3.13 | P | OUT |
| QL01341 | 1,1,1,2,2,3,3,4,4,5,5,6,6-tridecafluorohexadec-7-ene                                                                                | 120464-27-9  | CCCCCCCC=CC(F)(F)C(F)(F)C(F)(F)C(F)(F)C(F)(F)C(F)(F)F                                                                          | -7.71 | 0.62 | 3.06 | P | OUT |
| QL01343 | (5E)-1,1,1,2,2,3,3,4,4-Nonafluorotetradec-5-ene                                                                                     | 104504-30-5  | CCCCCCCC=CC(F)(F)C(F)(F)C(F)(F)C(F)(F)F                                                                                        | -6.78 | 0.60 | 2.87 | P | OUT |
| QL01344 | Carbamic acid, [5-[[[2-[[[heptadecafluoroisooctyl)sulfonyl)methylamino]ethoxy]carbonyl]amino]-2-methylphenyl]-, 9-octadecenyl ester | 93894-74-7   | CCCCCCCC=CCCCCCCCOC(=O)NC1=CC(NC(=O)OCCN(C)S(=O)(=O)C(F)(F)C(F)(F)C(F)(F)C(F)(F)C(F)(F)C(F)(F)C(F)(F)C(F)(F)C(F)(F)F)=CC=C1C   | -9.44 | 0.60 | 4.22 | P | OUT |
| QL01345 | 1,1,1,2,2,3,3,4,4,5,5,6,6,7,7,8,8,9,9,10,10,11,11,12,12,13,13-Heptacosafluorodocosane                                               | 1309378-06-0 | CCCCCCCC(F)(F)C(F)(F)C(F)(F)C(F)(F)C(F)(F)C(F)(F)C(F)(F)C(F)(F)C(F)(F)C(F)(F)C(F)(F)C(F)(F)C(F)(F)C(F)(F)F                     | -9.55 | 0.66 | 3.51 | P | OUT |
| QL01346 | 1,1,1,2,2,3,3,4,4,5,5,6,6,7,7,8,8,9,9,10,10,11,11,12,12-Pentacosafluorohenicosane                                                   | 677324-30-0  | CCCCCCCC(F)(F)C(F)(F)C(F)(F)C(F)(F)C(F)(F)C(F)(F)C(F)(F)C(F)(F)C(F)(F)C(F)(F)C(F)(F)C(F)(F)F                                   | -9.29 | 0.66 | 3.41 | P | OUT |
| QL01347 | 1,1,1,2,2,3,3,4,4,5,5,6,6,7,7,8,8,9,9,10,10-Henicosafluorononadecane                                                                | 125635-85-0  | CCCCCCCC(F)(F)C(F)(F)C(F)(F)C(F)(F)C(F)(F)C(F)(F)C(F)(F)C(F)(F)C(F)(F)C(F)(F)F                                                 | -8.85 | 0.65 | 3.28 | P | OUT |
| QL01348 | 1,1,1,2,2,3,3,4,4,5,5,6,6,7,7,8,8,9,9-Nonadecafluorooctadecane                                                                      | 1287702-47-9 | CCCCCCCC(F)(F)C(F)(F)C(F)(F)C(F)(F)C(F)(F)C(F)(F)C(F)(F)C(F)(F)C(F)(F)F                                                        | -8.70 | 0.65 | 3.26 | P | OUT |
| QL01349 | 1,1,1,2,2,3,3,4,4,5,5,6,6,7,7,8-Heptadecafluoroheptadecane                                                                          | 931415-52-0  | CCCCCCCC(F)(F)C(F)(F)C(F)(F)C(F)(F)C(F)(F)C(F)(F)C(F)(F)F                                                                      | -8.34 | 0.64 | 3.15 | P | OUT |
| QL01350 | 1,1,1,2,2,3,3,4,4,5,5,6,6-Tridecafluoropentadecane                                                                                  | 113659-13-5  | CCCCCCCC(F)(F)C(F)(F)C(F)(F)C(F)(F)C(F)(F)F                                                                                    | -7.60 | 0.63 | 2.95 | P | OUT |
| QL01351 | 1,1,1,2,2,3,3,4,4-Nonafluorotridecane                                                                                               | 234433-63-7  | CCCCCCCC(F)(F)C(F)(F)C(F)(F)C(F)(F)F                                                                                           | -6.63 | 0.61 | 2.73 | P | OUT |
| QL01352 | 1,1,1,2,2,3,3-Heptafluorododecane                                                                                                   | 69125-78-6   | CCCCCCCC(F)(F)C(F)(F)C(F)(F)F                                                                                                  | -6.11 | 0.59 | 2.67 | P | OUT |
| QL01353 | 1,1,1,2,2,3,3,4,4,5,5,6,6,7,7,8,8,9,9,10,10-Henicosafluoro-12-iodohenicosane                                                        | 129838-42-2  | CCCCCCCC(I)CC(F)(F)C(F)(F)C(F)(F)C(F)(F)C(F)(F)C(F)(F)C(F)(F)C(F)(F)C(F)(F)F                                                   | -9.00 | 0.64 | 3.44 | P | OUT |
| QL01354 | 1,1,1,2,2,3,3,4,4,5,5,6,6-Tridecafluoro-8-iodoheptadecane                                                                           | 207122-01-8  | CCCCCCCC(I)CC(F)(F)C(F)(F)C(F)(F)C(F)(F)C(F)(F)C(F)(F)F                                                                        | -7.79 | 0.62 | 3.12 | P | OUT |
| QL01355 | N-Decyl-N,N-dimethyl-1-decanaminium perfluorooctanesulfonate                                                                        | 251099-16-8  | CCCCCCCCC[N+](C)(C)CCCCCCCC.[O-]S(=O)(=O)C(F)(F)C(F)(F)C(F)(F)C(F)(F)C(F)(F)C(F)(F)C(F)(F)F                                    | -8.81 | 0.61 | 3.77 | P | OUT |
| QL01356 | N,N,N-Triethyldec-1-aminium heptadecafluorooctane-1-sulfonate                                                                       | 773895-92-4  | CCCCCCCCC[N+](CC)(CC)CC.[O-]S(=O)(=O)C(F)(F)C(F)(F)C(F)(F)C(F)(F)C(F)(F)C(F)(F)C(F)(F)F                                        | -7.37 | 0.63 | 2.84 | P | OUT |
| QL01357 | 1,1,1,2,2,3,3,4,4,5,5,6,6,7,7,8,8,9,9,10,10,11,11,12,12-Pentacosafluorodocosane                                                     | 93454-72-9   | CCCCCCCC(F)(F)C(F)(F)C(F)(F)C(F)(F)C(F)(F)C(F)(F)C(F)(F)C(F)(F)C(F)(F)C(F)(F)C(F)(F)C(F)(F)F                                   | -9.41 | 0.65 | 3.52 | P | OUT |



|         |                                                                                               |              |                                                                                                |       |      |      |   |     |
|---------|-----------------------------------------------------------------------------------------------|--------------|------------------------------------------------------------------------------------------------|-------|------|------|---|-----|
| QL01395 | 1,1,1,2,2,3,3,4,4,5,5,6,6,7,7,8,8,9,9,10,10-Henicosafuorotetracosane                          | 200817-56-7  | CCCCCCCCCCCCCCCC(F)(F)C(F)(F)C(F)(F)C(F)(F)C(F)(F)C(F)(F)C(F)(F)C(F)(F)C(F)(F)F                | -9.06 | 0.63 | 3.63 | P | OUT |
| QL01396 | 1-(Perfluoro-n-octyl)tetradecane                                                              | 133310-72-2  | CCCCCCCCCCCCCCCC(F)(F)C(F)(F)C(F)(F)C(F)(F)C(F)(F)C(F)(F)C(F)(F)C(F)(F)F                       | -8.51 | 0.62 | 3.49 | P | OUT |
| QL01397 | 1,1,1,2,2,3,3,4,4,5,5,6,6-Tridecafluoroicosane                                                | 154628-00-9  | CCCCCCCCCCCCCCCC(F)(F)C(F)(F)C(F)(F)C(F)(F)C(F)(F)C(F)(F)F                                     | -7.85 | 0.61 | 3.35 | P | OUT |
| QL01398 | 1,1,1,2,2,3,3,4,4,5,5-Undecafluorononadecane                                                  | 112344-48-6  | CCCCCCCCCCCCCCCC(F)(F)C(F)(F)C(F)(F)C(F)(F)C(F)(F)F                                            | -7.38 | 0.60 | 3.24 | P | OUT |
| QL01399 | 1,1,1,2,2,3,3,4,4-Nonafluorooctadecane                                                        | 133310-68-6  | CCCCCCCCCCCCCCCC(F)(F)C(F)(F)C(F)(F)C(F)(F)F                                                   | -7.00 | 0.59 | 3.20 | P | OUT |
| QL01400 | 1,1,1,2,2,3,3,4,4,5,5,6,6,7,7,8,8,9,9,10,10-Henicosafluoro-12-iodohexacosane                  | 1257261-91-8 | CCCCCCCCCCCCCCCC(I)CC(F)(F)C(F)(F)C(F)(F)C(F)(F)C(F)(F)C(F)(F)C(F)(F)C(F)(F)C(F)(F)F           | -9.17 | 0.63 | 3.74 | P | OUT |
| QL01401 | 1,1,1,2,2,3,3,4,4,5,5,6,6,7,7,8,8-Heptadecafluoro-10-iodotetracosane                          | 1257261-94-1 | CCCCCCCCCCCCCCCC(I)CC(F)(F)C(F)(F)C(F)(F)C(F)(F)C(F)(F)C(F)(F)C(F)(F)C(F)(F)F                  | -8.65 | 0.62 | 3.61 | P | OUT |
| QL01402 | 1,1,1,2,2,3,3,4,4,5,5,6,6,7,7-Pentadecafluoro-9-iodotricosane                                 | 57325-43-6   | CCCCCCCCCCCCCCCC(I)CC(F)(F)C(F)(F)C(F)(F)C(F)(F)C(F)(F)C(F)(F)C(F)(F)F                         | -8.30 | 0.61 | 3.52 | P | OUT |
| QL01403 | 1,1,1,2,2,3,3,4,4,5,5,6,6,7,7,8,8,9,9,10,11,11,12,12-Pentacosafluorooctacos-13-ene            | 1151525-71-1 | CCCCCCCCCCCCCCCC=CC(F)(F)C(F)(F)C(F)(F)C(F)(F)C(F)(F)C(F)(F)C(F)(F)C(F)(F)C(F)(F)C(F)(F)F      | -9.56 | 0.64 | 3.84 | P | OUT |
| QL01404 | 1,1,1,2,2,3,3,4,4,5,5,6,6,7,7,8,8,9,9,10,10-Henicosafluorohexacos-11-ene                      | 1244062-18-7 | CCCCCCCCCCCCCCCC=CC(F)(F)C(F)(F)C(F)(F)C(F)(F)C(F)(F)C(F)(F)C(F)(F)C(F)(F)C(F)(F)F             | -9.10 | 0.63 | 3.72 | P | OUT |
| QL01405 | 1,1,1,2,2,3,3,4,4,5,5,6,6,7,7,8,8-Heptadecafluorotetracos-9-ene                               | 1244062-16-5 | CCCCCCCCCCCCCCCC=CC(F)(F)C(F)(F)C(F)(F)C(F)(F)C(F)(F)C(F)(F)C(F)(F)C(F)(F)F                    | -8.57 | 0.62 | 3.60 | P | OUT |
| QL01406 | 1,1,1,2,2,3,3,4,4,5,5,6,6-Tridecafluorodocos-7-ene                                            | 1244062-15-4 | CCCCCCCCCCCCCCCC=CC(F)(F)C(F)(F)C(F)(F)C(F)(F)C(F)(F)C(F)(F)F                                  | -7.92 | 0.60 | 3.47 | P | OUT |
| QL01407 | 2,2,3,3,4,4,5,5,6,6,7,7,8,8,8-pentadecafluorooctyl hexadecanoate                              | 111918-97-9  | CCCCCCCCCCCCCCCCC(=O)OCC(F)(F)C(F)(F)C(F)(F)C(F)(F)C(F)(F)C(F)(F)C(F)(F)F                      | -8.40 | 0.61 | 3.63 | P | OUT |
| QL01408 | 1,1,1,2,2,3,3,4,4,5,5,6,6,7,7,8,8,9,9,10,11,11,12,12-Pentacosafluoroheptacosane               | 116177-48-1  | CCCCCCCCCCCCCCCC(F)(F)C(F)(F)C(F)(F)C(F)(F)C(F)(F)C(F)(F)C(F)(F)C(F)(F)C(F)(F)C(F)(F)F         | -9.50 | 0.64 | 3.78 | P | OUT |
| QL01409 | 1,1,1,2,2,3,3,4,4,5,5,6,6,7,7,8,8,9,9,10,10-Henicosafluoropentacosane                         | 250738-43-3  | CCCCCCCCCCCCCCCC(F)(F)C(F)(F)C(F)(F)C(F)(F)C(F)(F)C(F)(F)C(F)(F)C(F)(F)C(F)(F)F                | -9.04 | 0.63 | 3.65 | P | OUT |
| QL01410 | 1,1,1,2,2,3,3,4,4,5,5,6,6,7,7,8,8,9,9-Nonadecafluorotetracosane                               | 113659-16-8  | CCCCCCCCCCCCCCCC(F)(F)C(F)(F)C(F)(F)C(F)(F)C(F)(F)C(F)(F)C(F)(F)C(F)(F)F                       | -8.82 | 0.63 | 3.61 | P | OUT |
| QL01411 | 1,1,1,2,2,3,3,4,4,5,5,6,6,7,7,8,8-Heptadecafluorotricosane                                    | 871311-24-9  | CCCCCCCCCCCCCCCC(F)(F)C(F)(F)C(F)(F)C(F)(F)C(F)(F)C(F)(F)C(F)(F)C(F)(F)F                       | -8.49 | 0.62 | 3.52 | P | OUT |
| QL01412 | 1-(Perfluoro-n-octyl)hexadecane                                                               | 117146-18-6  | CCCCCCCCCCCCCCCCC(C)C(C)C(C)C(C)(F)(F)(F)(F)(F)(F)(F)(F)(F)(F)(F)(F)F                          | -8.57 | 0.62 | 3.60 | P | OUT |
| QL01413 | 1,1,1,2,2,3,3,4,4,5,5,6,6,7,7,8,8,9,9,10,10,11,11,12,12,13,13,14,14-Nonacosafluorotriacontane | 1228093-93-3 | CCCCCCCCCCCCCCCCC(F)(F)C(F)(F)C(F)(F)C(F)(F)C(F)(F)C(F)(F)C(F)(F)C(F)(F)C(F)(F)C(F)(F)C(F)(F)F | -9.95 | 0.64 | 3.95 | P | OUT |
| QL01414 | 1,1,1,2,2,3,3,4,4,5,5,6,6,7,7,8,8,9,9,10,10,11,11,12,12-Pentacosafluorooctacosane             | 93454-74-1   | CCCCCCCCCCCCCCCCC(F)(F)C(F)(F)C(F)(F)C(F)(F)C(F)(F)C(F)(F)C(F)(F)C(F)(F)C(F)(F)C(F)(F)F        | -9.56 | 0.64 | 3.84 | P | OUT |
| QL01415 | 1,1,1,2,2,3,3,4,4,5,5,6,6,7,7,8,8,9,9,10,10,11,11-Tricosafluoroheptacosane                    | 1980054-34-9 | CCCCCCCCCCCCCCCCC(F)(F)C(F)(F)C(F)(F)C(F)(F)C(F)(F)C(F)(F)C(F)(F)C(F)(F)C(F)(F)F               | -9.30 | 0.63 | 3.76 | P | OUT |
| QL01416 | 1,1,1,2,2,3,3,4,4,5,5,6,6,7,7,8,8,9,9,10,10-Henicosafluorohexacosane                          | 167641-85-2  | CCCCCCCCCCCCCCCCC(F)(F)C(F)(F)C(F)(F)C(F)(F)C(F)(F)C(F)(F)C(F)(F)C(F)(F)C(F)(F)F               | -9.10 | 0.63 | 3.72 | P | OUT |
| QL01417 | 1,1,1,2,2,3,3,4,4,5,5,6,6,7,7-Pentadecafluorotricosane                                        | 57325-44-7   | CCCCCCCCCCCCCCCCC(F)(F)C(F)(F)C(F)(F)C(F)(F)C(F)(F)C(F)(F)C(F)(F)F                             | -8.21 | 0.61 | 3.51 | P | OUT |
| QL01418 | 1-(Perfluorohexyl)hexadecane                                                                  | 133310-71-1  | CCCCCCCCCCCCCCCCC(F)(F)C(F)(F)C(F)(F)C(F)(F)C(F)(F)F                                           | -7.92 | 0.60 | 3.47 | P | OUT |
| QL01419 | 1,1,1,2,2,3,3,4,4-Nonafluoroicosane                                                           |              |                                                                                                |       |      |      |   |     |













|         |                                                                                                                     |              |                                                                                     |
|---------|---------------------------------------------------------------------------------------------------------------------|--------------|-------------------------------------------------------------------------------------|
| QL01597 | Ethyl 2-(pentadecafluoroheptyl)imidazo[1,2-a]pyridine-3-carboxylate                                                 | 135339-05-8  | CCOC(=O)c1c(nc2cccc12)C(F)(F)(F)(F)(F)(F)(F)(F)(F)(F)(F)(F)                         |
| QL01598 | Ethyl 3-methyl-5-(nonafluorobutyl)-1H-pyrazole-4-carboxylate                                                        | 119403-58-6  | CCOC(=O)c1c1(cnc1C)C(F)(F)(F)(F)(F)(F)(F)F                                          |
| QL01599 | Ethyl 6-(heptafluoropropyl)pyridine-3-carboxylate                                                                   | 1574401-92-5 | CCOC(=O)c1ccc(nc1)C(F)(F)(F)(F)(F)(F)F                                              |
| QL01600 | Ethyl 4-[(nonafluorobutyl)sulfanyl]benzoate                                                                         | 1262679-06-0 | CCOC(=O)c1ccc(SC(F)(F)(F)(F)(F)(F)(F)(F))cc1                                        |
| QL01601 | Ethyl 2-(heptafluoropropyl)benzoate                                                                                 | 1310492-25-1 | CCOC(=O)c1cccc1C(F)(F)(F)(F)(F)(F)F                                                 |
| QL01602 | Ethyl 5-(2,2,3,3,4,4,4-heptafluorobutanamido)-1-phenyl-1H-pyrazole-4-carboxylate                                    | 545359-89-5  | CCOC(=O)c1cnn(c1NC(=O)C(F)(F)(F)(F)(F)(F))-c1ccccc1                                 |
| QL01603 | Ethyl 4,4,5,5,6,6,7,7,7-nonafluoro-3-oxoheptanoate                                                                  | 82941-37-5   | CCOC(=O)CCC(=O)C(F)(F)(F)(F)(F)(F)(F)(F)F                                           |
| QL01604 | Ethyl heptafluorobutyrylacetae                                                                                      | 336-62-9     | CCOC(=O)CCC(=O)C(F)(F)(F)(F)(F)(F)(F)F                                              |
| QL01605 | Ethyl pentafluoropropionyl acetate                                                                                  | 663-35-4     | CCOC(=O)CCC(=O)C(F)(F)(F)(F)(F)F                                                    |
| QL01606 | Ethyl 7,7,8,8,9,9,10,10,10-nonafluoro-3-oxodecanoate                                                                | 1444474-83-2 | CCOC(=O)CCC(=O)CCCC(F)(F)(F)(F)(F)(F)(F)(F)F                                        |
| QL01607 | Ethyl 4,4,5,5,6,6,6-heptafluoro-3,3-bis(trifluoromethyl)hexanoate                                                   | 161261-13-8  | CCOC(=O)CCC(C(F)(F)(F)(F)(F)(F)C(F)(F)(F)(F)(F)(F)F                                 |
| QL01608 | Ethyl 4,4,5,5,6,6,6-heptafluoro-3-(nitromethyl)hexanoate                                                            | 376-88-5     | CCOC(=O)CCC(CN+)[([O-])=O]C(F)(F)(F)(F)(F)(F)F                                      |
| QL01609 | Octanoic acid, 3,3,4,4,5,5,6,6,7,7,8,8,8-tridecafluoro-, ethyl ester                                                | 153296-01-6  | CCOC(=O)CCC(F)(F)(F)(F)(F)(F)(F)(F)(F)(F)(F)(F)F                                    |
| QL01610 | Ethyl 3,3,4,4,5,5,6,6,6-nonafluorohexanoate                                                                         | 172287-15-9  | CCOC(=O)CCC(F)(F)(F)(F)(F)(F)(F)(F)(F)F                                             |
| QL01611 | Ethyl 3,3,4,4,5,5,5-heptafluoropentanoate                                                                           | 773136-96-2  | CCOC(=O)CCC(=O)C(F)(F)(F)(F)(F)(F)F                                                 |
| QL01612 | Ethyl 4,4,5,5,6,6,6-heptafluoro-3-hydroxyhexanoate                                                                  | 2707-76-8    | CCOC(=O)CC(O)C(F)(F)(F)(F)(F)(F)(F)F                                                |
| QL01613 | Ethyl 4,4,5,5,6,6,6-heptafluoro-3-sulfanylhenoate                                                                   | 377-64-0     | CCOC(=O)CCC(S)C(F)(F)(F)(F)(F)(F)(F)F                                               |
| QL01614 | Ethyl 3-(2-ethoxy-2-oxoethyl)-5-(2,2,3,3,4,4,5,5,6,6,7,7,8,8,9,9,9-heptadecafluorononyl)-2-oxooxalane-3-carboxylate | 674786-75-5  | CCOC(=O)CC1(CC(CCC(F)(F)(F)(F)(F)(F)(F)(F)(F)(F)(F)(F)(F)(F)(F)(F)(F)OC1=O)C(=O)OCC |
| QL01615 | Ethyl [5-(heptafluoropropyl)-1-methyl-1H-pyrazol-3-yl]acetate                                                       | 1428569-19-0 | CCOC(=O)Cc1ccn(n(C)n1)C(F)(F)(F)(F)(F)(F)F                                          |
| QL01616 | Ethyl [3-(heptafluoropropyl)-1-methyl-1H-pyrazol-5-yl]acetate                                                       | 1428569-18-9 | CCOC(=O)Cc1cc(nn1C)C(F)(F)(F)(F)(F)(F)F                                             |
| QL01617 | Ethyl [5-(heptafluoropropyl)-1H-pyrazol-3-yl]acetate                                                                | 1428569-15-6 | CCOC(=O)Cc1nnC(c1C)C(F)(F)(F)(F)(F)(F)F                                             |
| QL01618 | Ethyl 3-(perfluorohexyl)propanoate                                                                                  | 60023-26-9   | CCOC(=O)CCCC(F)(F)(F)(F)(F)(F)(F)(F)(F)(F)(F)(F)F                                   |
| QL01619 | Ethyl 4,4,5,5,6,6,7,7,7-nonafluoroheptanoate                                                                        | 136905-37-8  | CCOC(=O)CCCC(F)(F)(F)(F)(F)(F)(F)(F)(F)F                                            |
| QL01620 | Ethyl 4,4,5,5,6,6,6-heptafluorohexanoate                                                                            | 424-66-8     | CCOC(=O)CCC(F)(F)(F)(F)(F)(F)(F)F                                                   |
| QL01621 | Ethyl 4,4-difluoro-5-[(1,1,2,2,3,3,4,4,4-nonafluorobutane-1-sulfonyl)oxy]pentanoate                                 | 1361253-41-9 | CCOC(=O)CCC(F)(F)COS(=O)(=O)C(F)(F)(F)(F)(F)(F)(F)(F)F                              |
| QL01622 | Ethyl N-[2,2,3,3,4,4,4-heptafluorobutanoyl]glycinate                                                                | 88435-34-1   | CCOC(=O)CNC(=O)C(F)(F)(F)(F)(F)(F)F                                                 |
| QL01623 | Ethyl 3-[(2-ethoxy-2-oxoethyl)amino]-4,4,5,5,6,6,7,7,7-nonafluoroheptanoate                                         | 132114-64-8  | CCOC(=O)CNC(CC(=O)O)OCC(C(F)(F)(F)(F)(F)(F)(F)(F)(F)F                               |
| QL01624 | Ethyl [(2,2,3,3,4,4,4-heptafluorobutanimidoyl)oxy]acetate                                                           | 4314-33-4    | CCOC(=O)COC(=N)C(F)(F)(F)(F)(F)(F)F                                                 |
| QL01625 | Ethyl [(1,1,2,2,3,3,4,4,4-nonafluorobutane-1-sulfonyl)acetate                                                       | 161123-65-5  | CCOC(=O)CS(=O)(=O)C(F)(F)(F)(F)(F)(F)(F)(F)F                                        |
| QL01626 | 3-Ethoxyperfluoro(2-methylhexane)                                                                                   | 297730-93-9  | CCOC(C(C)(F)(F)(F)(F)(F)(F)F)C(C(C(C)(F)(F)(F)(F)(F)F)F                             |
| QL01627 | 10,10-Diethoxy-1,1,2,2,3,3,4,4,5,5,6,6,7,7,8,8-heptadecafluorodecane                                                | 133377-48-7  | CCOC(CC(F)(F)(F)(F)(F)(F)(F)(F)(F)(F)(F)(F)(F)(F)(F)F)OCC                           |
| QL01628 | 2-(1-Ethoxy-1,2,2,3,3,4,4,4-octafluorobutyl)aniline                                                                 | 217474-47-0  | CCOC(F)(c1cccc1N)C(F)(F)(F)(F)(F)(F)F                                               |
| QL01629 | 2-Trifluoromethylpropyl ethyl ether                                                                                 | 163702-06-5  | CCOC(F)(F)(F)(F)(F)(F)(F)C(F)(F)F                                                   |
| QL01630 | 1-Ethoxy-1,1,2,2,3,3,4,4,5,5,5-undecafluoropentane                                                                  | 181214-75-5  | CCOC(F)(F)(F)(F)(F)(F)(F)(F)(F)(F)(F)F                                              |
| QL01631 | 1-Ethoxy-1,1,2,2,3,3,3-hexafluoro-2-(trifluoromethyl)propane-1-ethoxy-1,1,2,2,3,3,4,4,4-nonafluorobutane (1/1)      | 813458-04-7  | CCOC(F)(F)(F)(F)(F)(F)(F)(F)(F)F.CCOC(F)(F)(F)(F)(F)(F)(F)(F)(F)F                   |
| QL01632 | Diethoxymethyl(1H,1H,2H,2H-perfluorohexyl)silane                                                                    | 83038-83-9   | CCOC(OCC)[SiH2][CCC(F)(F)(F)(F)(F)(F)(F)(F)F                                        |

[illegible]









|         |                                                                                                                                             |              |                                                                                                                                |
|---------|---------------------------------------------------------------------------------------------------------------------------------------------|--------------|--------------------------------------------------------------------------------------------------------------------------------|
| QL01783 | Methyl 2,3,3,3-tetrafluoro-2-[(undecafluoropentyl)oxy]propanoate                                                                            | 220369-95-9  | COC(=O)C(F)(OC(F)(F)C(F)(F)C(F)(F)C(F)(F)C(F)(F)F                                                                              |
| QL01784 | Methyl perfluoro(2-propoxypropanoate)                                                                                                       | 13140-34-6   | COC(=O)C(F)(OC(F)(F)C(F)(F)C(F)(F)C(F)(F)F                                                                                     |
| QL01785 | Methyl 2,3,3,3-tetrafluoro-2-(pentafluoroethoxy)propanoate                                                                                  | 117516-09-3  | COC(=O)C(F)(OC(F)(F)C(F)(F)C(F)(F)F                                                                                            |
| QL01786 | Methyl 2,3,3,3-tetrafluoro-2-[1,1,2,3,3,3-hexafluoro-2-(heptafluoropropoxy)propoxy]propanoate                                               | 26131-32-8   | COC(=O)C(F)(OC(F)(F)C(F)(OC(F)(F)C(F)(F)C(F)(F)C(F)(F)C(F)(F)F                                                                 |
| QL01787 | Methylperfluoro-2,5,8-trimethyl-3,6,9-trioxadodecanoic acid                                                                                 | 39187-47-8   | COC(=O)C(F)(OC(F)(F)C(F)(OC(F)(F)C(F)(OC(F)(F)C(F)(F)C(F)(F)C(F)(F)C(F)(F)F                                                    |
| QL01788 | Perfluorotetramethyltetraoxapentadecanoicacidme                                                                                             | 133609-46-8  | COC(=O)C(F)(OC(F)(F)C(F)(OC(F)(F)C(F)(OC(F)(F)C(F)(OC(F)(F)C(F)(F)C(F)(F)C(F)(F)C(F)(F)F                                       |
| QL01789 | Methyl 2,4,4,5,7,7,8,10,10,11,13,13,14,16,16,17,17,18,18-icosafuoro-2,5,8,11,14-pentakis(trifluoromethyl)-3,6,9,12,15-pentaooxadecan-1-oate | 1005033-64-6 | COC(=O)C(F)(OC(F)(F)C(F)(OC(F)(F)C(F)(OC(F)(F)C(F)(OC(F)(F)C(F)(OC(F)(F)C(F)(F)C(F)(F)C(F)(F)C(F)(F)C(F)(F)C(F)(F)F            |
| QL01790 | Methyl 2,3,4,4,5,5,6,6,6-nonafluorohex-2-enoate                                                                                             | 88022-46-2   | COC(=O)C(F)=C(F)C(F)(F)C(F)(F)C(F)(F)F                                                                                         |
| QL01791 | Methyl 3-amino-4,4,5,5,6,6,6-heptafluorohex-2-enoate                                                                                        | 106203-17-2  | COC(=O)C=C(N)C(F)(F)C(F)(F)C(F)(F)F                                                                                            |
| QL01792 | Methyl 4,4,5,5,6,6,6-heptafluorohex-2-enoate                                                                                                | 813-06-9     | COC(=O)C=CC(F)(F)C(F)(F)C(F)(F)F                                                                                               |
| QL01793 | Methyl 3-(heptadecafluorooctyl)benzoate                                                                                                     | 80791-11-3   | COC(=O)C1=CC(=CC=C1)C(F)(F)C(F)(F)C(F)(F)C(F)(F)C(F)(F)C(F)(F)C(F)(F)F                                                         |
| QL01794 | Methyl 4-(heptadecafluorooctyl)benzoate                                                                                                     | 80791-12-4   | COC(=O)C1=CC=C(C=C1)C(F)(F)C(F)(F)C(F)(F)C(F)(F)C(F)(F)C(F)(F)C(F)(F)C(F)(F)F                                                  |
| QL01795 | Methyl 4-(nonafluorobutyl)benzoate                                                                                                          | 88951-00-2   | COC(=O)C1=CC=C(C=C1)C(F)(F)C(F)(F)C(F)(F)C(F)(F)F                                                                              |
| QL01796 | Methyl 4-(heptafluoropropyl)benzoate                                                                                                        | 64299-47-4   | COC(=O)C1=CC=C(C=C1)C(F)(F)C(F)(F)C(F)(F)F                                                                                     |
| QL01797 | Methyl 5-(heptafluoropropyl)furan-2-carboxylate                                                                                             | 104939-25-5  | COC(=O)C1=CC=C(O1)C(F)(F)C(F)(F)C(F)(F)F                                                                                       |
| QL01798 | Methyl 2-(heptafluoropropyl)-6-methoxybenzoate                                                                                              | 109296-89-1  | COC(=O)c1c(OC)cccc1C(F)(F)C(F)(F)C(F)(F)F                                                                                      |
| QL01799 | Methyl 2-methoxy-6-[(1,1,2,2,3,3,4,4,4-nonafluorobutane-1-sulfonyl)oxy]benzoate                                                             | 475630-76-3  | COC(=O)c1c(OC)cccc1OS(=O)(=O)C(F)(F)C(F)(F)C(F)(F)C(F)(F)F                                                                     |
| QL01800 | Methyl 3,4,5-tris[1,1,2-trifluoro-2-(heptafluoropropoxy)ethoxy]benzoate                                                                     | 1233312-86-1 | COC(=O)c1cc(OC(F)(F)C(F)OC(F)(F)C(F)(F)C(F)(F)F)c(OC(F)(F)C(F)OC(F)(F)C(F)(F)C(F)(F)F)c(OC(F)(F)C(F)OC(F)(F)C(F)(F)C(F)(F)F)c1 |
| QL01801 | Methyl 4-(1,1,1,2,3,3,3-heptafluoropropan-2-yl)benzoate                                                                                     | 51114-06-8   | COC(=O)c1ccc(cc1)C(F)(C(F)(F)C(F)(F)F                                                                                          |
| QL01802 | Methyl 4-(pentadecafluoroheptyl)cyclohexane-1-carboxylate                                                                                   | 88951-17-1   | COC(=O)C1CCC(CC1)C(F)(F)C(F)(F)C(F)(F)C(F)(F)C(F)(F)C(F)(F)F                                                                   |
| QL01803 | Methyl 4-(tridecafluoroheptyl)cyclohexane-1-carboxylate                                                                                     | 88951-16-0   | COC(=O)C1CCC(CC1)C(F)(F)C(F)(F)C(F)(F)C(F)(F)C(F)(F)C(F)(F)F                                                                   |
| QL01804 | Methyl 4-(undecafluoropentyl)cyclohexane-1-carboxylate                                                                                      | 88951-15-9   | COC(=O)C1CCC(CC1)C(F)(F)C(F)(F)C(F)(F)C(F)(F)C(F)(F)F                                                                          |
| QL01805 | Methyl 4-(nonafluorobutyl)cyclohexane-1-carboxylate                                                                                         | 88951-14-8   | COC(=O)C1CCC(CC1)C(F)(F)C(F)(F)C(F)(F)C(F)(F)F                                                                                 |
| QL01806 | Methyl 2,4-dichloro-3-[(1,1,2,2,3,3,4,4,4-nonafluorobutane-1-sulfonyl)oxy]benzoate                                                          | 1451750-40-5 | COC(=O)c1ccc(Cl)c(OS(=O)(=O)C(F)(F)C(F)(F)C(F)(F)C(F)(F)C1                                                                     |
| QL01807 | Methyl 4-[(1,1,1,4,5,5,5-heptafluoro-3-(1,1,1,2,3,3,3-heptafluoropropan-2-yl)-4-(trifluoromethyl)pent-2-en-2-yl]oxy]benzoate                | 66432-83-5   | COC(=O)c1ccc(OC(=C(C(F)(F)C(F)(F)C(F)(F)C(F)(F)C(F)(F)C(F)(F)F)cc1                                                             |
| QL01808 | Methyl 4,4,5,5,6,6,7,7,7-nonafluoro-3-oxoheptanoate                                                                                         | 89129-70-4   | COC(=O)CC(=O)C(F)(F)C(F)(F)C(F)(F)C(F)(F)F                                                                                     |
| QL01809 | Methyl 4,4,5,5,6,6,6-heptafluoro-3-oxohexanoate                                                                                             | 89129-68-0   | COC(=O)CC(=O)C(F)(F)C(F)(F)C(F)(F)F                                                                                            |
| QL01810 | Methyl 4,6,6-trichloro-7,7,7-trifluoro-3,3-dimethylheptanoate                                                                               | 72714-62-6   | COC(=O)CC(C)(C)C(C)CC(Cl)(Cl)C(F)(F)F                                                                                          |
| QL01811 | Methyl 4,4,5,5,6,6,6-heptafluoro-3,3-dihydroxyhexanoate                                                                                     | 89148-14-1   | COC(=O)CC(O)(O)C(F)(F)C(F)(F)C(F)(F)F                                                                                          |
| QL01812 | Methyl 5,5,6,6,7,7,8,8,9,9,9-undecafluoro-4-oxononanoate                                                                                    | 1456734-51-2 | COC(=O)CCCC(=O)C(F)(F)C(F)(F)C(F)(F)C(F)(F)C(F)(F)F                                                                            |
| QL01813 | Methyl 4,4,5,5,6,6,7,7,8,8,9,9,10,10,11,11,11-heptadecafluoroundecanoate                                                                    | 132424-37-4  | COC(=O)CCCC(F)(F)C(F)(F)C(F)(F)C(F)(F)C(F)(F)C(F)(F)C(F)(F)C(F)(F)F                                                            |
| QL01814 | Methyl 3-(perfluorohexyl)propanoate                                                                                                         | 110260-75-8  | COC(=O)CCC(F)(F)C(F)(F)C(F)(F)C(F)(F)C(F)(F)F                                                                                  |
| QL01815 | Methyl 2H,2H,3H,3H-perfluoroheptanoate                                                                                                      | 132424-36-3  | COC(=O)CCC(F)(F)C(F)(F)C(F)(F)C(F)(F)F                                                                                         |
| QL01816 | Methyl 4,4,5,5,6,6,6-heptafluorohexanoate                                                                                                   | 2070-60-2    | COC(=O)CCC(F)(F)C(F)(F)C(F)(F)F                                                                                                |
| QL01817 | Methyl N-(2,2,3,3,4,4,4-heptafluorobutanoyl)glycinate                                                                                       | 81084-29-9   | COC(=O)CNC(=O)C(F)(F)C(F)(F)C(F)(F)F                                                                                           |

|       |      |      |   |     |
|-------|------|------|---|-----|
| -7.60 | 0.67 | 2.40 | P | IN  |
| -6.61 | 0.66 | 2.03 | P | IN  |
| -6.03 | 0.65 | 1.84 | P | IN  |
| -7.71 | 0.66 | 2.48 | P | IN  |
| -8.43 | 0.67 | 2.79 | P | IN  |
| -9.05 | 0.67 | 3.08 | P | OUT |
| -9.52 | 0.67 | 3.29 | P | OUT |
| -6.43 | 0.64 | 2.17 | P | IN  |
| -6.32 | 0.64 | 2.18 | P | IN  |
| -6.15 | 0.63 | 2.15 | P | OUT |
| -8.37 | 0.66 | 2.90 | P | IN  |
| -8.48 | 0.66 | 2.95 | P | IN  |
| -7.15 | 0.64 | 2.56 | P | IN  |
| -6.79 | 0.63 | 2.50 | P | OUT |
| -6.52 | 0.63 | 2.29 | P | IN  |
| -5.72 | 0.62 | 2.12 | P | OUT |
| -6.88 | 0.63 | 2.50 | P | OUT |
| -8.78 | 0.66 | 3.17 | P | IN  |
| -6.03 | 0.63 | 2.16 | P | OUT |
| -8.31 | 0.66 | 2.91 | P | IN  |
| -7.89 | 0.65 | 2.76 | P | IN  |
| -7.62 | 0.65 | 2.70 | P | IN  |
| -7.15 | 0.64 | 2.56 | P | IN  |
| -7.47 | 0.65 | 2.63 | P | IN  |
| -7.08 | 0.64 | 2.46 | P | IN  |
| -6.74 | 0.65 | 2.26 | P | IN  |
| -6.32 | 0.64 | 2.18 | P | IN  |
| -6.22 | 0.63 | 2.21 | P | OUT |
| -6.67 | 0.65 | 2.19 | P | IN  |
| -7.33 | 0.65 | 2.53 | P | IN  |
| -8.21 | 0.66 | 2.74 | P | IN  |
| -7.55 | 0.66 | 2.52 | P | IN  |
| -6.68 | 0.64 | 2.27 | P | IN  |
| -6.15 | 0.63 | 2.15 | P | OUT |
| -6.31 | 0.63 | 2.26 | P | OUT |











[illegible]





[illegible]



|         |                                                                                                                                                                                 |             |                                                                                                                         |
|---------|---------------------------------------------------------------------------------------------------------------------------------------------------------------------------------|-------------|-------------------------------------------------------------------------------------------------------------------------|
| QL02103 | 2-(N-Ethylperfluorooctanesulfonamido)acetic acid (EtFOAA)                                                                                                                       | 2991-50-6   | FC(F)(C(F)(F)C(F)(F)C(F)(F)C(F)(F)C(F)(F)C(F)(F)C(F)(F)S(=O)(=O)N(CC(O)=O)CC                                            |
| QL02105 | 1,1,2,2,3,3,4,4,5,5,6,6,7,7-pentadecafluoroheptane-1-sulfonamide                                                                                                                | 82765-77-3  | FC(F)(C(F)(F)C(F)(F)C(F)(F)C(F)(F)C(F)(F)C(F)(F)S(=O)(N)=O                                                              |
| QL02106 | n2 fluorotelomer thioamido ammonium, n=3                                                                                                                                        |             | FC(F)(C(F)(F)C(F)(F)C(F)(F)C(F)(F)C(F)(F)CCSCC(NCCC[N+](C)(C)C)=O=O                                                     |
| QL02107 | Perfluorooctanesulfonamido ethanol                                                                                                                                              | 10116-92-4  | FC(F)(C(F)(F)C(F)(F)C(F)(F)C(F)(F)C(F)(F)C(F)(F)S(=O)(NCCO)=O                                                           |
| QL02108 | Perfluorohexanesulfonamide                                                                                                                                                      | 41997-13-1  | FC(F)(C(F)(F)C(F)(F)C(F)(F)C(F)(F)C(F)(F)S(=O)(N)=O                                                                     |
| QL02109 | N-ethyl-1,1,2,2,3,3,4,4,5,5,6,6-tridecafluorohexane-1-sulfonamide                                                                                                               | 87988-56-5  | FC(F)(C(F)(F)C(F)(F)C(F)(F)C(F)(F)C(F)(F)S(=O)(NCC)=O                                                                   |
| QL02110 | 1,1,1,2,2,3,3,4,4,5,5-undecafluoro-5-(propylsulfonyl)pentane                                                                                                                    | 40630-67-9  | FC(F)(C(F)(F)C(F)(F)C(F)(F)C(F)(F)C(F)(F)S(=O)(CCC)=O                                                                   |
| QL02111 | 1,1,2,2,3,3,4,4,5,5,5-undecafluoropentane-1-sulfonamide                                                                                                                         | 82765-76-2  | FC(F)(C(F)(F)C(F)(F)C(F)(F)C(F)(F)S(=O)(N)=O                                                                            |
| QL02112 | N-ethyl-1,1,2,2,3,3,4,4,5,5,5-undecafluoropentane-1-sulfonamide                                                                                                                 | 162682-16-8 | FC(F)(C(F)(F)C(F)(F)C(F)(F)C(F)(F)C(F)(F)S(=O)(NCC)=O                                                                   |
| QL02113 | 3-(Perfluorobutyl)propanoic acid                                                                                                                                                | 80705-13-1  | FC(F)(C(F)(F)C(F)(F)C(F)(F)C(F)(F)CCC(=O)O                                                                              |
| QL02114 | 1-(Perfluorohexyl)octane                                                                                                                                                        | 133331-77-8 | FC(F)(C(F)(F)C(F)(F)C(F)(F)C(F)(F)C(F)(F)CCCCCCCC                                                                       |
| QL02115 | Perfluorobutylsulphonamide                                                                                                                                                      | 30334-69-1  | FC(F)(C(F)(F)C(F)(F)C(F)(F)C(F)(F)S(=O)(N)=O                                                                            |
| QL02116 | di Cl-substituted perfluoroalkyl (linear) sulfonic acids, C8                                                                                                                    |             | FC(F)(C(F)(F)C(S(=O)=O)=O)(F)C(Cl)(F)C(C(F)(F)C(Cl)(F)C(F)(F)F                                                          |
| QL02117 | Perfluoro-1,2-bis(perfluorocyclohexyl)ethane                                                                                                                                    | 306-99-0    | FC(F)(C(F)(F)C1(F)C(F)(F)C(F)(F)C(F)(F)C1(F)C(F)(F)C(F)(F)C(F)(F)C1(F)F                                                 |
| QL02118 | 82 Fluorotelomer aldehyde                                                                                                                                                       | 135984-68-8 | FC(F)(C(F)(F)CC=O)C(F)(F)C(F)(F)C(F)(F)C(F)(F)C(F)(F)F                                                                  |
| QL02119 | 42 Fluorotelomer aldehyde                                                                                                                                                       | 135984-67-7 | FC(F)(C(F)(F)CC=O)C(F)(F)C(F)(F)F                                                                                       |
| QL02121 | double bond-, di-ether substituted perfluoroalkyl (linear) sulfonic acids, C7                                                                                                   |             | FC(F)(C(S(=O)=O)=O)(F)OC(F)(C(F)(F)C(F)(F)O/C(F)=C(F)F                                                                  |
| QL02122 | H-substituted, di-ether-substituted perfluoroalkyl (linear) sulfonic acids, C7                                                                                                  |             | FC(F)(C(S(=O)=O)=O)(F)OC(F)(C(F)(F)C(F)(F)OC(F)(F)C([H])F                                                               |
| QL02123 | 1,8-Divinylperfluorooctane                                                                                                                                                      | 35192-44-0  | FC(F)(C=C)C(F)(F)C(F)(F)C(F)(F)C(F)(F)C(F)(F)C(F)(F)C=C                                                                 |
| QL02124 | 1,6-Divinylperfluorohexane                                                                                                                                                      | 1800-91-5   | FC(F)(C=C)C(F)(F)C(F)(F)C(F)(F)C(F)(F)C(F)(F)C=C                                                                        |
| QL02125 | 1,4-Divinylperfluorobutane                                                                                                                                                      | 678-65-9    | FC(F)(C=C)C(F)(F)C(F)(F)C(F)(F)C=C                                                                                      |
| QL02126 | Perfluoro(4a-(cyclohexylmethyl)decahydronaphthalene)                                                                                                                            | 125061-94-1 | FC(F)(C1(F)C(F)(F)C(F)(F)C(F)(F)C(F)(F)C1(F)C(F)(F)C(F)(F)C(F)(F)C2(F)C(F)(F)C(F)(F)C(F)(F)C12F                         |
| QL02127 | Perfluoroperhydrobenzyl tetralin<br>[1,1,1,2,2,3,3,4,4,14,14,15,15,16,16,17,17,17-Octadecafluoro-10-(4,4,5,5,6,6,7,7,7-nonafluoroheptyl)heptadec-9-en-8-yl]-lambda~2~-stannanyl | 116265-66-8 | FC(F)(C1(F)C(F)(F)C(F)(F)C(F)(F)C(F)(F)C1(F)C(F)(F)C(F)(F)C(F)(F)C2(F)C(F)(F)C(F)(F)C(F)(F)C2(F)C1(F)F                  |
| QL02128 |                                                                                                                                                                                 | 217805-03-3 | FC(F)(CCCC[SnH])C=C(CCCC(F)(F)C(F)(F)C(F)(F)C(F)(F)CCCC(F)(F)C(F)(F)C(F)(F)C(F)(F)C(F)(F)C(F)(F)F  ^1:7                 |
| QL02129 | Decane, 3,3,4,4,5,5,6,6,7,7,8,8-dodecafluoro-1,10-diiodo-                                                                                                                       | 1813-83-8   | FC(F)(CCI)C(F)(F)C(F)(F)C(F)(F)C(F)(F)C(F)(F)CCI                                                                        |
| QL02130 | 82 Fluorotelomer phosphate diester                                                                                                                                              | 678-41-1    | FC(F)(CCOP(=O)(OCCC(F)(F)C(F)(F)C(F)(F)C(F)(F)C(F)(F)C(F)(F)C(F)(F)O)C(F)(F)C(F)(F)C(F)(F)C(F)(F)C(F)(F)C(F)(F)C(F)(F)F |
| QL02131 | 62 Fluorotelomer phosphate diester                                                                                                                                              | 4004-51-7   | FC(F)(CCOP(=O)(OCCC(F)(F)C(F)(F)C(F)(F)C(F)(F)C(F)(F)C(F)(F)O)C(F)(F)C(F)(F)C(F)(F)C(F)(F)C(F)(F)F                      |
| QL02133 | Bis(3,5,6-trichloro-2,2,3,4,4,5,6,6-octafluoro-1-oxohexyl)peroxide                                                                                                              | 28285-49-6  | FC(F)(Cl)C(F)(Cl)C(F)(F)C(F)(Cl)C(F)(F)C(=O)OOC(=O)C(F)(F)C(F)(Cl)C(F)(F)C(F)(Cl)C(F)(F)Cl                              |
| QL02134 | 3,5,6-Trichloro-2,2,3,4,4,5,6,6-octafluorohexanoyl chloride                                                                                                                     | 1422-98-6   | FC(F)(Cl)C(F)(Cl)C(F)(F)C(F)(Cl)C(F)(F)C(Cl)=O                                                                          |
| QL02135 | 4,5-Dichloroperfluoro-3-oxapentanesulfonyl fluoride                                                                                                                             | 144728-59-6 | FC(F)(Cl)C(F)(Cl)OC(F)(F)C(F)S(F)=O=O                                                                                   |
| QL02140 | 1-Chloro-6-iodoperfluorohexane                                                                                                                                                  | 16486-97-8  | FC(F)(Cl)C(F)(F)C(F)(F)C(F)(F)Cl                                                                                        |
| QL02137 | 1,8-Dichloroperfluorooctane                                                                                                                                                     | 647-25-6    | FC(F)(Cl)C(F)(F)C(F)(F)C(F)(F)C(F)(F)C(F)(F)C(F)(F)Cl                                                                   |
| QL02138 | 1-Chloro-8-iodoperfluorooctane                                                                                                                                                  | 16486-98-9  | FC(F)(Cl)C(F)(F)C(F)(F)C(F)(F)C(F)(F)C(F)(F)C(F)(F)I                                                                    |
| QL02139 | 11-chloroperfluoro-3-oxadecanesulfonyl fluoride                                                                                                                                 | 73606-15-2  | FC(F)(Cl)C(F)(F)C(F)(F)C(F)(F)C(F)(F)C(F)(F)C(F)(F)OC(F)(F)C(F)S(F)=O=O                                                 |
| QL02140 | 1-Chloro-6-iodoperfluorohexane                                                                                                                                                  | 16486-97-8  | FC(F)(Cl)C(F)(F)C(F)(F)C(F)(F)C(F)(F)Cl                                                                                 |
| QL02142 | 1,4-Dichloro-1,1,2,2,3,3,4,4-octafluorobutane                                                                                                                                   | 355-24-8    | FC(F)(Cl)C(F)(F)C(F)(F)C(F)(F)Cl                                                                                        |
| QL02143 | 1,3-Dichloro-1,1,2,2,3,3-hexafluoropropane                                                                                                                                      | 662-01-1    | FC(F)(Cl)C(F)(F)C(F)(F)Cl                                                                                               |
| QL02144 | 1H,1H,6H,6H-Perfluorohexane-1,6-diol diacrylate                                                                                                                                 | 2264-01-9   | FC(F)(COC(=O)C=C)C(F)(F)C(F)(F)COC(=O)C=C                                                                               |
| QL02145 | 1H,1H,5H,5H-Perfluoro-1,5-pentanediol diacrylate                                                                                                                                | 678-95-5    | FC(F)(COC(=O)C=C)C(F)(F)C(F)(F)COC(=O)C=C                                                                               |

|         |                                                                                                      |              |                                                                       |
|---------|------------------------------------------------------------------------------------------------------|--------------|-----------------------------------------------------------------------|
| QL02146 | 1,5-bis(2,3-epoxypropoxy)-2,2,3,3,4,4-hexafluoropentane                                              | 4798-39-4    | FC(F)(COCC1OC1)C(F)(F)C(F)(F)COCC2OC2                                 |
| QL02147 | cis-Perfluoro-2,4-dimethylcyclobutane                                                                | 1583-97-7    | FC(F)(F)[C@]1(F)C(F)(F)[C@](F)(C(F)(F)C1(F)F                          |
| QL02148 | (2R,4R)-1,1,2,3,3,4-Hexafluoro-2,4-bis(trifluoromethyl)cyclobutane                                   | 1583-98-8    | FC(F)(F)[C@]1(F)C(F)(F)[C@](F)(C(F)(F)F)C1(F)F                        |
| QL02149 | double bond-, ether-substituted perfluoroalkyl (linear) carboxylic acids, n=4                        |              | FC(F)(F)/C(F)=C(F)/C(F)(F)C(F)(F)C(F)(F)OC(F)(F)C(O)=O                |
| QL02150 | double bond-, ether-substituted perfluoroalkyl (linear) carboxylic acids, n=3                        |              | FC(F)(F)/C(F)=C(F)/C(F)(F)C(F)(F)C(F)(F)OC(F)(F)C(O)=O                |
| QL02151 | double bond-, ether-substituted perfluoroalkyl (linear) carboxylic acids, n=2                        |              | FC(F)(F)/C(F)=C(F)/C(F)(F)C(F)(F)OC(F)(F)C(O)=O                       |
| QL02152 | double bond-, ether-substituted perfluoroalkyl (linear) carboxylic acids, n=1                        |              | FC(F)(F)/C(F)=C(F)/C(F)(F)OC(F)(F)C(O)=O                              |
| QL02153 | double bond-, ether-substituted perfluoroalkyl (linear) carboxylic acids, n=0                        |              | FC(F)(F)/C(F)=C(OC(F)(F)C(O)=O)F                                      |
| QL02154 | H-substituted perfluoroalkyl (linear) sulfonic acids_ii, n=8                                         |              | FC(F)(F)C([H])(F)C(F)(F)C(F)(F)C(F)(F)C(F)(F)C(F)(F)C(F)(F)S(=O)(O)=O |
| QL02155 | H-substituted perfluoroalkyl (linear) sulfonic acids_ii, n=7                                         |              | FC(F)(F)C([H])(F)C(F)(F)C(F)(F)C(F)(F)C(F)(F)C(F)(F)C(F)(F)S(=O)(O)=O |
| QL02156 | H-substituted perfluoroalkyl (linear) sulfonic acids_ii, n=6                                         |              | FC(F)(F)C([H])(F)C(F)(F)C(F)(F)C(F)(F)C(F)(F)C(F)(F)S(=O)(O)=O        |
| QL02157 | H-substituted perfluoroalkyl (linear) sulfonic acids_ii, n=5                                         |              | FC(F)(F)C([H])(F)C(F)(F)C(F)(F)C(F)(F)C(F)(F)S(=O)(O)=O               |
| QL02158 | H-substituted perfluoroalkyl (linear) sulfonic acids_ii, n=4                                         |              | FC(F)(F)C([H])(F)C(F)(F)C(F)(F)C(F)(F)S(=O)(O)=O                      |
| QL02159 | H-substituted perfluoroalkyl (linear) sulfonic acids_ii, n=3                                         |              | FC(F)(F)C([H])(F)C(F)(F)C(F)(F)S(=O)(O)=O                             |
| QL02160 | H-substituted perfluoroalkyl (linear) sulfonic acids_ii, n=2                                         |              | FC(F)(F)C([H])(F)C(F)(F)S(=O)(O)=O                                    |
| QL02161 | H-substituted perfluoroalkyl (linear) sulfonic acids_ii, n=1                                         |              | FC(F)(F)C([H])(F)C(F)S(=O)(O)=O                                       |
| QL02162 | Perfluoro-3-ethyl-2,4-dimethyl-2-pentene                                                             | 30320-26-4   | FC(F)(F)C=C(C(F)(F)C(F)(F)C(F)(F)C(F)(F)F)C(F)(F)F                    |
| QL02163 | 1,1-Bis(trifluoromethyl)ethene                                                                       | 382-10-5     | FC(F)(F)C=C(C(F)(F)F                                                  |
| QL02164 | 5-Fluoro-5,7,7-tris(trifluoromethyl)-6-(2,2,2-trifluoro-1-(trifluoromethyl)ethylidene)-1,4-dioxepane | 94333-56-9   | FC(F)(F)C=C1C(F)(OCCOC1(C(F)(F)F)C(F)(F)C(F)(F)F                      |
| QL02165 | 3-Trifluoromethylperfluoro-2-pentanone                                                               | 93830-92-3   | FC(F)(F)C(=O)C(F)(C(F)(F)C(F)(F)C(F)(F)F                              |
| QL02166 | 1,1,1,3,4,4,4-Heptafluoro-3-(trifluoromethyl)butan-2-one                                             | 756-12-7     | FC(F)(F)C(=O)C(F)(C(F)(F)C(F)(F)F                                     |
| QL02167 | 1,1,1,3,3,4,5,5,5-Nonafluoro-4-(trifluoromethyl)pentan-2-one                                         | 73041-05-1   | FC(F)(F)C(=O)C(F)(F)C(F)(C(F)(F)C(F)(F)F                              |
| QL02168 | ketone perfluoroalkyl (linear) carboxylic acids, n=8                                                 |              | FC(F)(F)C(=O)C(F)(F)C(F)(F)C(F)(F)C(F)(F)C(F)(F)C(F)(F)S(=O)(O)=O     |
| QL02169 | ketone perfluoroalkyl (linear) carboxylic acids, n=7                                                 |              | FC(F)(F)C(=O)C(F)(F)C(F)(F)C(F)(F)C(F)(F)C(F)(F)S(=O)(O)=O            |
| QL02170 | ketone perfluoroalkyl (linear) carboxylic acids, n=5                                                 |              | FC(F)(F)C(=O)C(F)(F)C(F)(F)C(F)(F)S(=O)(O)=O                          |
| QL02171 | ketone perfluoroalkyl (linear) carboxylic acids, n=4                                                 |              | FC(F)(F)C(=O)C(F)(F)C(F)(F)S(=O)(O)=O                                 |
| QL02172 | ketone perfluoroalkyl (linear) carboxylic acids, n=3                                                 |              | FC(F)(F)C(=O)C(F)(F)C(F)(F)S(=O)(O)=O                                 |
| QL02173 | 2,2,2-Trifluoro-1-[4-(tridecafluorohexyl)phenyl]ethan-1-one                                          | 171183-94-1  | FC(F)(F)C(=O)C1ccc(cc1)C(F)(F)C(F)(F)C(F)(F)C(F)(F)F                  |
| QL02174 | 1,1,1,5,5,6,6,7,7,8,8,9,9,10,10,10-hexadecafluorodecane-2,4-dione                                    | 147874-76-8  | FC(F)(F)C(=O)CC(=O)C(F)(F)C(F)(F)C(F)(F)C(F)(F)C(F)(F)F               |
| QL02175 | 1,1,1,5,5,6,6,7,7,8,8,8-dodecafluorooctane-2,4-dione                                                 | 261503-40-6  | FC(F)(F)C(=O)CC(=O)C(F)(F)C(F)(F)C(F)(F)F                             |
| QL02176 | 3H,3H-Perfluoroheptane-2,4-dione                                                                     | 20583-66-8   | FC(F)(F)C(=O)CC(=O)C(F)(F)C(F)(F)F                                    |
| QL02177 | 3H,3H-Perfluoro-2,4-hexanedione                                                                      | 20825-07-4   | FC(F)(F)C(=O)CC(=O)C(F)(F)C(F)(F)F                                    |
| QL02178 | 3-(Perfluorohexyl)-1-(trifluoroacetyl)-5-(trifluoromethyl)-1H-pyrazole                               | 261778-38-5  | FC(F)(F)C(=O)N1N=C(C=C1C(F)(F)C(F)(F)C(F)(F)C(F)(F)C(F)(F)F           |
| QL02179 | 2,2,3,3,4,4,4-Heptafluorobutyl trifluoroacetate                                                      | 1365808-09-8 | FC(F)(F)C(=O)OCC(F)(F)C(F)(F)C(F)(F)F                                 |
| QL02180 | 2,2,3,3,4,4,4-Heptafluoro-N-[(trifluoroacetyl)oxy]butanamide                                         | 88326-80-1   | FC(F)(F)C(=O)ONC(=O)C(F)(F)C(F)(F)C(F)(F)F                            |
| QL02181 | 1,1,1,3,3,5,5,5-Octafluoro-2,2,4,4-tetrakis(trifluoromethyl)pentane                                  | 62375-54-6   | FC(F)(F)C(C(F)(F)F)C(F)(F)C(F)(F)C(C(F)(F)F)C(F)(F)C(F)(F)F           |

|       |      |      |   |     |
|-------|------|------|---|-----|
| -6.73 | 0.62 | 2.61 | P | OUT |
| -7.28 | 0.69 | 1.89 | P | IN  |
| -7.28 | 0.69 | 1.89 | P | IN  |
| -7.72 | 0.66 | 2.50 | P | IN  |
| -7.48 | 0.66 | 2.44 | P | IN  |
| -6.91 | 0.65 | 2.23 | P | IN  |
| -6.55 | 0.64 | 2.17 | P | IN  |
| -5.75 | 0.63 | 1.91 | P | IN  |
| -8.71 | 0.69 | 2.69 | P | IN  |
| -8.34 | 0.69 | 2.51 | P | IN  |
| -8.16 | 0.68 | 2.45 | P | IN  |
| -7.70 | 0.68 | 2.24 | P | IN  |
| -7.48 | 0.68 | 2.16 | P | IN  |
| -6.88 | 0.68 | 1.90 | P | IN  |
| -6.58 | 0.67 | 1.81 | P | IN  |
| -5.73 | 0.67 | 1.46 | P | IN  |
| -6.01 | 0.67 | 1.52 | P | IN  |
| -4.98 | 0.65 | 1.30 | P | IN  |
| -5.49 | 0.66 | 1.47 | P | IN  |
| -6.50 | 0.67 | 1.75 | P | IN  |
| -5.62 | 0.67 | 1.37 | P | IN  |
| -6.41 | 0.67 | 1.71 | P | IN  |
| -8.71 | 0.69 | 2.69 | P | IN  |
| -8.34 | 0.69 | 2.51 | P | IN  |
| -7.70 | 0.68 | 2.24 | P | IN  |
| -7.48 | 0.68 | 2.16 | P | IN  |
| -6.88 | 0.68 | 1.90 | P | IN  |
| -8.23 | 0.66 | 2.75 | P | IN  |
| -8.01 | 0.67 | 2.51 | P | IN  |
| -7.28 | 0.67 | 2.24 | P | IN  |
| -6.95 | 0.66 | 2.15 | P | IN  |
| -6.23 | 0.65 | 1.88 | P | IN  |
| -8.26 | 0.67 | 2.67 | P | IN  |
| -6.82 | 0.66 | 2.11 | P | IN  |
| -6.93 | 0.65 | 2.23 | P | IN  |
| -6.08 | 0.68 | 1.46 | P | IN  |



|         |                                                                                                        |              |                                                                        |       |      |      |   |     |
|---------|--------------------------------------------------------------------------------------------------------|--------------|------------------------------------------------------------------------|-------|------|------|---|-----|
| QL02220 | 2,3,3,3-Tetrafluoro-2-(trifluoromethyl)propanenitrile                                                  | 42532-60-5   | FC(F)(F)C(F)(C#N)C(F)(F)F                                              | -5.05 | 0.65 | 1.28 | P | IN  |
| QL02221 | 2-Vinylperfluoropropane                                                                                | 88562-41-8   | FC(F)(F)C(F)(C=C)C(F)(F)F                                              | -5.05 | 0.65 | 1.28 | P | IN  |
| QL02223 | 3,4,4,4-Tetrafluoro-1-iodo-3-(trifluoromethyl)but-1-ene                                                | 24716-85-6   | FC(F)(F)C(F)(C=C)C(F)(F)F                                              | -4.78 | 0.63 | 1.42 | P | IN  |
| QL02224 | 1,4-Bis(heptafluoroisopropyl)benzene                                                                   | 51114-12-6   | FC(F)(F)C(F)(C1=CC=C(C=C1)C(F)(C(F)(F)F)C(F)(F)F)C(F)(F)F              | -6.65 | 0.66 | 1.99 | P | IN  |
| QL02225 | AGN-PC-0NHL39                                                                                          | 40161-59-9   | FC(F)(F)C(F)(C1=CC=C(I)C=C1)C(F)(F)F                                   | -5.86 | 0.64 | 1.90 | P | IN  |
| QL02226 | 6-(1,1,2,3,3,3-Heptafluoropropan-2-yl)-3-((pyridin-3-yl)methyl)amino)-3,4-dihydroquinazolin-2(1H)-one  | 337457-78-0  | FC(F)(F)C(F)(C1=CC2=C(NC(=O)N(C2)NCC2=CN=CC=C2)C=C1)C(F)(F)F           | -6.84 | 0.62 | 2.72 | P | OUT |
| QL02227 | 3-Chloro-5-(1,1,1,2,3,3,3-heptafluoropropan-2-yl)pyridin-2(1H)-one                                     | 1771743-43-1 | FC(F)(F)C(F)(C1=CNC(=O)C(C1)=C1)C(F)(F)F                               | -6.01 | 0.64 | 1.90 | P | IN  |
| QL02228 | 5-(1,1,1,2,3,3,3-Heptafluoropropan-2-yl)pyrimidine-2,4(1H,3H)-dione                                    | 80384-59-4   | FC(F)(F)C(F)(C1=CNC(=O)NC1=O)C(F)(F)F                                  | -5.97 | 0.64 | 1.93 | P | IN  |
| QL02229 | 2-(1,1,1,2,3,3,3-Heptafluoropropan-2-yl)pyridine-4-carbonitrile                                        | 929211-36-9  | FC(F)(F)C(F)(c1cc(ccn1)C#N)C(F)(F)F                                    | -5.45 | 0.63 | 1.88 | P | OUT |
| QL02230 | 2-Bromo-1,3-dichloro-5-(1,1,1,2,3,3,3-heptafluoropropan-2-yl)benzene                                   | 353272-59-0  | FC(F)(F)C(F)(c1cc(Cl)c(Br)c(Cl)c1)C(F)(F)F                             | -6.09 | 0.65 | 1.90 | P | IN  |
| QL02231 | 1-Bromo-4-(1,1,1,2,3,3,3-heptafluoropropan-2-yl)benzene                                                | 2396-23-8    | FC(F)(F)C(F)(c1ccc(Br)cc1)C(F)(F)F                                     | -5.86 | 0.64 | 1.90 | P | IN  |
| QL02232 | 4-(1,1,1,2,3,3,3-Heptafluoropropan-2-yl)benzaldehyde                                                   | 875306-42-6  | FC(F)(F)C(F)(c1ccc(C=O)cc1)C(F)(F)F                                    | -6.03 | 0.63 | 2.15 | P | OUT |
| QL02233 | 1-(Chloromethyl)-4-(1,1,1,2,3,3,3-heptafluoropropan-2-yl)benzene                                       | 75462-58-7   | FC(F)(F)C(F)(c1ccc(CCl)cc1)C(F)(F)F                                    | -6.03 | 0.63 | 2.15 | P | OUT |
| QL02234 | 2-Chloro-5-(1,1,1,2,3,3,3-heptafluoropropan-2-yl)pyridine                                              | 1807450-20-9 | FC(F)(F)C(F)(c1ccc(Cl)nc1)C(F)(F)F                                     | -5.86 | 0.64 | 1.90 | P | IN  |
| QL02235 | 2-(1,1,1,2,3,3,3-Heptafluoropropan-2-yl)naphthalene                                                    | 51114-14-8   | FC(F)(F)C(F)(c1cccc2cccc2c1)C(F)(F)F                                   | -6.05 | 0.63 | 2.12 | P | OUT |
| QL02236 | 5-(1,1,1,2,3,3,3-Heptafluoropropan-2-yl)-1,3-dihydro-2H-benzimidazol-2-one                             | 1433216-51-3 | FC(F)(F)C(F)(c1ccc2NC(=O)Nc2c1)C(F)(F)F                                | -6.33 | 0.64 | 2.12 | P | IN  |
| QL02237 | 6-(1,1,1,2,3,3,3-Heptafluoropropan-2-yl)-1,3-benzoxazol-2(3H)-one                                      | 1248393-88-5 | FC(F)(F)C(F)(c1ccc2NC(=O)Oc2c1)C(F)(F)F                                | -6.33 | 0.64 | 2.12 | P | IN  |
| QL02238 | 6-(1,1,1,2,3,3,3-Heptafluoropropan-2-yl)-1,3-benzothiazol-2(3H)-one                                    | 1433216-60-4 | FC(F)(F)C(F)(c1ccc2NC(=O)Sc2c1)C(F)(F)F                                | -6.33 | 0.64 | 2.12 | P | IN  |
| QL02239 | 5-(1,1,1,2,3,3,3-Heptafluoropropan-2-yl)-2,3-dihydro-1H-indole                                         | 273735-78-7  | FC(F)(F)C(F)(c1ccc2NCCc2c1)C(F)(F)F                                    | -5.76 | 0.64 | 1.87 | P | IN  |
| QL02240 | 5-(1,1,1,2,3,3,3-Heptafluoropropan-2-yl)-1H-indazole                                                   | 1433216-39-7 | FC(F)(F)C(F)(c1ccc2Nncc2c1)C(F)(F)F                                    | -5.76 | 0.64 | 1.87 | P | IN  |
| QL02241 | 6-(1,1,1,2,3,3,3-Heptafluoropropan-2-yl)-1H-benzotriazole                                              | 1433216-34-2 | FC(F)(F)C(F)(c1ccc2nnNc2c1)C(F)(F)F                                    | -5.76 | 0.64 | 1.87 | P | IN  |
| QL02242 | 1-Bromo-3-(1,1,1,2,3,3,3-heptafluoropropan-2-yl)benzene                                                | 2396-22-7    | FC(F)(F)C(F)(c1cccc(Br)c1)C(F)(F)F                                     | -5.44 | 0.64 | 1.71 | P | IN  |
| QL02243 | (1,1,1,2,3,3,3-Heptafluoropropan-2-yl)benzene                                                          | 378-34-7     | FC(F)(F)C(F)(c1ccccc1)C(F)(F)F                                         | -5.35 | 0.63 | 1.75 | P | OUT |
| QL02244 | 1-(1,1,1,2,3,3,3-Heptafluoropropan-2-yl)-2-iodocyclohexane                                             | 4316-00-1    | FC(F)(F)C(F)(C1CCCCC1)C(F)(F)F                                         | -5.45 | 0.64 | 1.74 | P | IN  |
| QL02245 | 2-Chloro-3-(1,1,1,2,3,3,3-heptafluoropropan-2-yl)pyridine                                              | 1816284-43-1 | FC(F)(F)C(F)(c1ccnc(Cl)C)C(F)(F)F                                      | -5.45 | 0.64 | 1.74 | P | IN  |
| QL02246 | 2-Chloro-4-(1,1,1,2,3,3,3-heptafluoropropan-2-yl)pyridine                                              | 1816286-71-1 | FC(F)(F)C(F)(c1ccnc(Cl)c1)C(F)(F)F                                     | -5.44 | 0.64 | 1.71 | P | IN  |
| QL02247 | 3-Bromo-5-(1,1,1,2,3,3,3-heptafluoropropan-2-yl)pyridine                                               | 1816285-38-7 | FC(F)(F)C(F)(c1cncc(Br)c1)C(F)(F)F                                     | -5.44 | 0.64 | 1.71 | P | IN  |
| QL02248 | 2,4,6-Tris(1,1,1,2,3,3,3-heptafluoropropan-2-yl)-1,3,5-triazine                                        | 10271-37-1   | FC(F)(F)C(F)(c1nc(nc(n1)C(F)(C(F)(F)F)C(F)(F)F)C(F)(F)F)C(F)(F)F       | -6.44 | 0.67 | 1.73 | P | IN  |
| QL02249 | 2-(1,1,1,2,3,3,3-Heptafluoropropan-2-yl)-1H-imidazole                                                  | 81790-00-3   | FC(F)(F)C(F)(c1Ncnc1)C(F)(F)F                                          | -4.90 | 0.64 | 1.40 | P | IN  |
| QL02250 | 5-(1,1,1,2,3,3,3-Heptafluoropropan-2-yl)-1H-imidazole                                                  | 81790-01-4   | FC(F)(F)C(F)(c1Ncnc1)C(F)(F)F                                          | -4.90 | 0.64 | 1.40 | P | IN  |
| QL02251 | 3,4,4,4-Tetrafluoro-1-phenyl-3-(trifluoromethyl)butan-1-one                                            | 82959-21-5   | FC(F)(F)C(F)(CC(=O)c1ccccc1)C(F)(F)F                                   | -5.90 | 0.63 | 2.10 | P | OUT |
| QL02252 | 3,4,4,4-Tetrafluoro-3-(trifluoromethyl)butanal                                                         | 131118-41-7  | FC(F)(F)C(F)(CC=O)C(F)(F)F                                             | -4.78 | 0.63 | 1.42 | P | IN  |
| QL02253 | [2,3,3,3-Tetrafluoro-2-(trifluoromethyl)propyl]oxirane                                                 | 74328-57-7   | FC(F)(F)C(F)(CC1CO1)C(F)(F)F                                           | -5.25 | 0.65 | 1.38 | P | IN  |
| QL02254 | 4-Bromo-1,1,1,2-tetrafluoro-2-(trifluoromethyl)butane                                                  | 1274903-97-7 | FC(F)(F)C(F)(CCBr)C(F)(F)F                                             | -4.78 | 0.63 | 1.42 | P | IN  |
| QL02255 | 2,4-Bis[3,4,4,4-tetrafluoro-3-(trifluoromethyl)butyl]-1lambda~6~,3lambda~6~-dithietane-1,1,3,3-tetrone | 1346175-94-7 | FC(F)(F)C(F)(CCC1S(=O)(=O)C(CCC(F)(C(F)(F)F)C(F)(F)F)S1(=O)=O)C(F)(F)F | -7.74 | 0.67 | 2.44 | P | IN  |

|         |                                                                                                                                                                       |              |                                                                                                                                                                                                                                       |       |      |      |   |     |
|---------|-----------------------------------------------------------------------------------------------------------------------------------------------------------------------|--------------|---------------------------------------------------------------------------------------------------------------------------------------------------------------------------------------------------------------------------------------|-------|------|------|---|-----|
| QL02256 | 1,1,1,2-Tetrafluoro-6-iodo-2-(trifluoromethyl)hexane                                                                                                                  | 99324-97-7   | FC(F)(F)C(F)(CCCCI)C(F)F                                                                                                                                                                                                              | -5.03 | 0.62 | 1.80 | P | OUT |
| QL02257 | 2-(2-Iodoethyl)perfluoropropane                                                                                                                                       | 99324-96-6   | FC(F)(F)C(F)(CCI)C(F)F                                                                                                                                                                                                                | -4.78 | 0.63 | 1.42 | P | IN  |
| QL02258 | 4-(Ethenyloxy)-1,1,1,2-tetrafluoro-2-(trifluoromethyl)butane                                                                                                          | 90999-86-3   | FC(F)(F)C(F)(CCOC=C)C(F)F                                                                                                                                                                                                             | -5.03 | 0.62 | 1.80 | P | OUT |
| QL02259 | 2,3-Dichloro-1,1,1,2,3,4,5,5,5-nonafluoro-4-(trifluoromethyl)pentane                                                                                                  | 85720-79-2   | FC(F)(F)C(F)(Cl)C(F)(Cl)C(F)(F)C(F)F                                                                                                                                                                                                  | -6.74 | 0.68 | 1.72 | P | IN  |
| QL02260 | 2,3-Dichlorooctafluorobutane                                                                                                                                          | NOCAS_870512 | FC(F)(F)C(F)(Cl)C(F)(Cl)C(F)F                                                                                                                                                                                                         | -6.18 | 0.68 | 1.45 | P | IN  |
| QL02261 | 1,2-Dichlorohexafluoropropane                                                                                                                                         | 661-97-2     | FC(F)(F)C(F)(Cl)C(F)(F)Cl                                                                                                                                                                                                             | -5.80 | 0.68 | 1.32 | P | IN  |
| QL02262 | 2λ5,4λ5,6λ5-1,3,5,2,4,6-Triazatriphosphorine, 2,2,4,4,6,6-hexakis[2,3,3,3-tetrafluoro-2-[1,1,2,3,3,3-hexafluoro-2-(1,1,2,2,3,3,3-heptafluoropropoxy)propoxy]propoxy]- | 1383437-42-0 | FC(F)(F)C(F)(COP1(OCC(F)(OC(F)(F)C(F)(F)C(F)(F)C(F)(F)F)=NP(OCC(F)(OC(F)(F)C(F)(F)C(F)(F)C(F)(F)F)=NP(OCC(F)(OC(F)(F)C(F)(F)C(F)(F)C(F)(F)F)=NP(OCC(F)(OC(F)(F)C(F)(F)C(F)(F)C(F)(F)F)=N1)OC(F)(F)C(F)(OC(F)(F)C(F)(F)C(F)(F)C(F)(F)F | -9.84 | 0.68 | 3.41 | P | OUT |
| QL02263 | Perfluoro-2-methyl-3-(propan-2-yl)pentan-3-yl                                                                                                                         | 93683-27-3   | FC(F)(F)C(F)(F)C(C)(C(F)(C(F)(F)C(F)F)C(F)(F)C(F)F                                                                                                                                                                                    | -6.25 | 0.68 | 1.53 | P | IN  |
| QL02264 | Perfluoro-2-methyl-3-pentanone                                                                                                                                        | 756-13-8     | FC(F)(F)C(F)(F)C(=O)C(F)(C(F)(F)C(F)F                                                                                                                                                                                                 | -6.44 | 0.68 | 1.68 | P | IN  |
| QL02265 | 1,1,1,2,2,4,4,5,5,5-Decafluoro-3-pentanone                                                                                                                            | 684-32-2     | FC(F)(F)C(F)(F)C(=O)C(F)(F)C(F)F                                                                                                                                                                                                      | -6.59 | 0.68 | 1.76 | P | IN  |
| QL02266 | 1-(2,2,3,3,3-Pentafluoro-1-oxopropyl)-1H-imidazole                                                                                                                    | 71735-32-5   | FC(F)(F)C(F)(F)C(=O)N1C=CN=C1                                                                                                                                                                                                         | -5.39 | 0.63 | 1.81 | P | OUT |
| QL02267 | Pentafluoropropanoic anhydride                                                                                                                                        | NOCAS_870515 | FC(F)(F)C(F)(F)C(=O)OC(=O)C(F)(F)C(F)F                                                                                                                                                                                                | -6.91 | 0.66 | 2.09 | P | IN  |
| QL02268 | Perfluoro(3-ethyl-2,3-dimethylpentane)                                                                                                                                | 50285-19-3   | FC(F)(F)C(F)(F)C(C(F)(F)F)(C(F)(F)C(F)(F)C(F)(F)C(F)(F)F                                                                                                                                                                              | -6.49 | 0.68 | 1.62 | P | IN  |
| QL02269 | 3,3-Bis(trifluoromethyl)perfluoropentane                                                                                                                              | 36591-89-6   | FC(F)(F)C(F)(F)C(C(F)(F)F)(C(F)(F)C(F)(F)C(F)(F)F                                                                                                                                                                                     | -6.49 | 0.68 | 1.63 | P | IN  |
| QL02270 | 3,3-Dichloro-1,1,1,2,2-pentafluoropropane                                                                                                                             | 422-56-0     | FC(F)(F)C(F)(F)C(Cl)Cl                                                                                                                                                                                                                | -5.29 | 0.66 | 1.36 | P | IN  |
| QL02271 | Perfluoro dimethylethylpentane                                                                                                                                        | 50285-18-2   | FC(F)(F)C(F)(F)C(F)(C(F)(F)F)C(F)(F)C(F)(F)C(F)(F)F                                                                                                                                                                                   | -6.45 | 0.68 | 1.58 | P | IN  |
| QL02272 | Perfluoro-2-methyl-3-ethylpentane                                                                                                                                     | 354-97-2     | FC(F)(F)C(F)(F)C(F)(C(F)(F)F)C(F)(F)C(F)(F)C(F)(F)F                                                                                                                                                                                   | -6.61 | 0.68 | 1.64 | P | IN  |
| QL02273 | Perfluoro-3,4-dimethylhexane                                                                                                                                          | 1735-48-4    | FC(F)(F)C(F)(F)C(F)(C(F)(F)F)C(F)(F)C(F)(F)C(F)(F)F                                                                                                                                                                                   | -6.87 | 0.68 | 1.78 | P | IN  |
| QL02274 | Perfluoro-2,3-dimethylpentane                                                                                                                                         | 335-14-8     | FC(F)(F)C(F)(F)C(F)(C(F)(F)F)C(F)(F)C(F)(F)F                                                                                                                                                                                          | -6.66 | 0.68 | 1.69 | P | IN  |
| QL02275 | 1,1,1,2,2,3,4,4,5,5,5-Undecafluoro-3-(trifluoromethyl)pentane                                                                                                         | 865-71-4     | FC(F)(F)C(F)(F)C(F)(C(F)(F)F)C(F)(F)C(F)(F)F                                                                                                                                                                                          | -6.74 | 0.68 | 1.72 | P | IN  |
| QL02276 | Perfluoro-2-methylbutane                                                                                                                                              | 594-91-2     | FC(F)(F)C(F)(F)C(F)(C(F)(F)F)C(F)F                                                                                                                                                                                                    | -6.00 | 0.68 | 1.38 | P | IN  |
| QL02277 | Perfluorodecahydro-1-sec-butyl-naphthalene                                                                                                                            | 118945-64-5  | FC(F)(F)C(F)(F)C(F)(F)C(F)(F)C1(F)C(F)(F)C(F)(F)C2(F)C(F)(F)C(F)(F)C(F)(F)C(F)(F)C(F)(F)C12F                                                                                                                                          | -7.85 | 0.70 | 2.09 | P | IN  |
| QL02278 | Perfluorodecahydro-2-sec-butyl-naphthalene                                                                                                                            | 119141-86-5  | FC(F)(F)C(F)(F)C(F)(F)C(F)(F)C1(F)C(F)(F)C(F)(F)C2(F)C(F)(F)C(F)(F)C(F)(F)C(F)(F)C2(F)C1(F)F                                                                                                                                          | -8.42 | 0.70 | 2.38 | P | IN  |
| QL02279 | (1S,2R)-1-(Heptafluoropropyl)-2-iodocyclohexane                                                                                                                       | 7589-44-8    | FC(F)(F)C(F)(F)C(F)(F)C(C@H)1CCCC[C@H]1I                                                                                                                                                                                              | -5.87 | 0.64 | 1.90 | P | IN  |
| QL02280 | CIS-1-iodo-2-(HEPTAFLUOROPROPYL)CYCLOHEXANE                                                                                                                           | 7589-43-7    | FC(F)(F)C(F)(F)C(F)(F)C(C@H)1CCCC[C@H]1I                                                                                                                                                                                              | -5.87 | 0.64 | 1.90 | P | IN  |
| QL02281 | 42 Fluorotelomer unsaturated aldehyde                                                                                                                                 | 864551-39-3  | FC(F)(F)C(F)(F)C(F)(F)/C(F)=C/C=O                                                                                                                                                                                                     | -5.78 | 0.63 | 1.93 | P | IN  |
| QL02282 | 1-Bromoheptafluoropropane                                                                                                                                             | 422-85-5     | FC(F)(F)C(F)(F)C(F)(F)Br                                                                                                                                                                                                              | -5.80 | 0.68 | 1.32 | P | IN  |
| QL02283 | Bis[1,1,1,3,3,4,4,5,5,5-decafluoro-2-(trifluoromethyl)pentan-2-yl]mercury                                                                                             | 120674-92-2  | FC(F)(F)C(F)(F)C(F)(F)C([Hg]C(C(F)(F)F)(C(F)(F)F)C(F)(F)C(F)(F)C(F)(F)C(F)(F)F                                                                                                                                                        | -7.50 | 0.68 | 2.12 | P | IN  |
| QL02284 | N-Chloro-2,2,3,3,4,4,4-heptafluorobutanimidamide                                                                                                                      | 13050-20-9   | FC(F)(F)C(F)(F)C(F)(F)C(=N)NCl                                                                                                                                                                                                        | -5.98 | 0.65 | 1.84 | P | IN  |
| QL02285 | N'-(Benzenesulfonyl)-2,2,3,3,4,4,4-heptafluorobutanimidohydrazide                                                                                                     | 4454-57-3    | FC(F)(F)C(F)(F)C(F)(F)C(=N)NNS(=O)(=O)c1ccccc1                                                                                                                                                                                        | -6.88 | 0.63 | 2.49 | P | OUT |
| QL02286 | 2-Diazo-4,4,5,5,6,6,6-heptafluoro-1-phenylhexane-1,3-dione                                                                                                            | 872186-76-0  | FC(F)(F)C(F)(F)C(F)(F)C(=O)C(=[N+]=[N-])C(=O)c1ccccc1                                                                                                                                                                                 | -6.42 | 0.62 | 2.45 | P | OUT |
| QL02287 | 1,2-Pentanedione, 3,3,4,4,5,5,5-heptafluoro-1-phenyl-                                                                                                                 | 69481-44-3   | FC(F)(F)C(F)(F)C(F)(F)C(=O)C(=O)C1=CC=CC=C1                                                                                                                                                                                           | -6.36 | 0.63 | 2.26 | P | OUT |
| QL02288 | 1-(1-Piperidinyl)-2-(triphenylphosphoranylidene)perfluorohexane-1,3-dione                                                                                             | 148192-46-5  | FC(F)(F)C(F)(F)C(F)(F)C(=O)C(C(=O)N1CCCCC1)=P(C1=CC=CC=C1)(C1=CC=CC=C1)C1=CC=CC=C1                                                                                                                                                    | -5.58 | 0.60 | 2.32 | P | OUT |
| QL02289 | 1,1,1,2,4,4,5,5,6,6,6-Undecafluoro-2-(trifluoromethyl)-3-hexanone                                                                                                     | 813-45-6     | FC(F)(F)C(F)(F)C(F)(F)C(=O)C(F)(C(F)(F)C(F)(F)F                                                                                                                                                                                       | -6.84 | 0.68 | 1.84 | P | IN  |
| QL02290 | 4,4,5,5,6,6,6-Heptafluoro-1-phenylhex-1-yn-3-one                                                                                                                      | 67036-08-2   | FC(F)(F)C(F)(F)C(F)(F)C(=O)C#CC1=CC=CC=C1                                                                                                                                                                                             | -6.46 | 0.62 | 2.42 | P | OUT |
| QL02291 | 1-Anilino-4,4,5,5,6,6,6-heptafluorohex-1-en-3-one                                                                                                                     | 34648-00-5   | FC(F)(F)C(F)(F)C(F)(F)C(=O)C=CNC1=CC=CC=C1                                                                                                                                                                                            | -6.42 | 0.62 | 2.49 | P | OUT |

|         |                                                                                            |             |                                                                                                                      |       |      |      |   |     |
|---------|--------------------------------------------------------------------------------------------|-------------|----------------------------------------------------------------------------------------------------------------------|-------|------|------|---|-----|
| QL02292 | 1-(3,5-Dibromophenyl)-2,2,3,3,4,4,4-heptafluorobutan-1-one                                 | 79851-20-0  | FC(F)(F)C(F)(F)C(F)(F)C(=O)C1=CC(Br)=CC(Br)=C1                                                                       | -6.41 | 0.64 | 2.15 | P | IN  |
| QL02293 | 2,2,3,3,4,4,4-heptafluoro-1-phenylbutan-1-one                                              | 559-91-1    | FC(F)(F)C(F)(F)C(F)(F)C(=O)C1=CC=CC=C1                                                                               | -6.23 | 0.63 | 2.17 | P | IN  |
| QL02294 | 2-(2,2,3,3,4,4,4-Heptafluorobutanoyl)cyclopentan-1-one                                     | 141478-83-3 | FC(F)(F)C(F)(F)C(F)(F)C(=O)C1CCCC1=O                                                                                 | -6.05 | 0.65 | 1.91 | P | IN  |
| QL02295 | 2-(2,2,3,3,4,4,4-Heptafluorobutanoyl)cyclohexan-1-one                                      | 37172-87-5  | FC(F)(F)C(F)(F)C(F)(F)C(=O)C1CCCCC1=O                                                                                | -6.31 | 0.64 | 2.15 | P | IN  |
| QL02296 | 5H,5H-Perfluoro-4,6-nonanedione                                                            | 113116-18-0 | FC(F)(F)C(F)(F)C(F)(F)C(=O)C(=O)C(F)(F)C(F)(F)C(F)F                                                                  | -7.72 | 0.67 | 2.38 | P | IN  |
| QL02297 | 4,4''-Bis((perfluoropropyl)-1,3-dioxopropyl)-o-terphenyl-4'-sulfonyl chloride              | 200862-70-0 | FC(F)(F)C(F)(F)C(F)(F)C(=O)CC(=O)C1=CC=C(C=C1)C1=C(C=C(C=C1)S(Cl))(=O)=O)C1=CC=C(C=C1)C(=O)CC(=O)C(F)(F)C(F)(F)C(F)F | -8.95 | 0.64 | 3.48 | P | OUT |
| QL02298 | 4,4,5,5,6,6,6-Heptafluoro-1-phenylhexane-1,3-dione                                         | 53580-21-5  | FC(F)(F)C(F)(F)C(F)(F)C(=O)CC(=O)C1=CC=CC=C1                                                                         | -6.58 | 0.63 | 2.43 | P | OUT |
| QL02299 | 4,4,5,5,6,6,6-Heptafluoro-1-(furan-2-yl)hexane-1,3-dione                                   | 595-26-6    | FC(F)(F)C(F)(F)C(F)(F)C(=O)CC(=O)C1=CC=CC=C1                                                                         | -6.39 | 0.63 | 2.24 | P | IN  |
| QL02300 | (Perfluorobutryryl)-2-thenoylmethane                                                       | 559-94-4    | FC(F)(F)C(F)(F)C(F)(F)C(=O)CC(=O)C1=CC=CC=C1                                                                         | -6.39 | 0.63 | 2.24 | P | IN  |
| QL02301 | 3,3,4,4,5,5,5-Heptafluoro-1-phenylpentan-2-one                                             | 559-96-6    | FC(F)(F)C(F)(F)C(F)(F)C(=O)CC1=CC=CC=C1                                                                              | -6.25 | 0.63 | 2.25 | P | OUT |
| QL02302 | 3,3,4,4,5,5,5-heptafluoro-1-pyridin-2-ylpentan-2-one                                       | 336-60-7    | FC(F)(F)C(F)(F)C(F)(F)C(=O)CC1=CC=CC=N1                                                                              | -6.25 | 0.63 | 2.25 | P | OUT |
| QL02303 | N,N-Dicyclohexyl-2,2,3,3,4,4,4-heptafluorobutanamide                                       | 386-84-5    | FC(F)(F)C(F)(F)C(F)(F)C(=O)N(C1CCCCC1)C1CCCCC1                                                                       | -5.75 | 0.61 | 2.21 | P | OUT |
| QL02304 | N,N-Dichloro-2,2,3,3,4,4,4-heptafluorobutanamide                                           | 86451-48-1  | FC(F)(F)C(F)(F)C(F)(F)C(=O)N(Cl)Cl                                                                                   | -6.21 | 0.66 | 1.83 | P | IN  |
| QL02305 | 1-(Heptafluorobutryryl)imidazole                                                           | 32477-35-3  | FC(F)(F)C(F)(F)C(F)(F)C(=O)N1C=CN=C1                                                                                 | -5.95 | 0.64 | 1.92 | P | IN  |
| QL02306 | N-Heptafluorobutrylproline                                                                 | 56236-41-0  | FC(F)(F)C(F)(F)C(F)(F)C(=O)N1CCC(C@H)1C(Cl)=O                                                                        | -6.38 | 0.64 | 2.15 | P | IN  |
| QL02307 | 1-(2,3-Dihydro-1H-indol-1-yl)-2,2,3,3,4,4,4-heptafluoro-1-butanone                         | 543708-46-9 | FC(F)(F)C(F)(F)C(F)(F)C(=O)N1CCC2=CC=CC=C12                                                                          | -6.44 | 0.64 | 2.24 | P | IN  |
| QL02308 | 2,2,3,3,4,4,4-heptafluoro-1-pyrrolidin-1-ylbutan-1-one                                     | 424-54-4    | FC(F)(F)C(F)(F)C(F)(F)C(=O)N1CCCC1                                                                                   | -5.95 | 0.64 | 1.92 | P | IN  |
| QL02309 | 2,2,3,3,4,4,4-Heptafluoro-1-(piperidin-1-yl)butan-1-one                                    | 425-19-4    | FC(F)(F)C(F)(F)C(F)(F)C(=O)N1CCCCC1                                                                                  | -6.23 | 0.63 | 2.17 | P | IN  |
| QL02310 | 1,1'-(Piperazine-1,4-diyl)bis(heptafluorobutan-1-one)                                      | 120219-50-3 | FC(F)(F)C(F)(F)C(F)(F)C(=O)N1CCN(CC1)C(=O)C(F)(F)C(F)(F)C(F)F                                                        | -7.97 | 0.66 | 2.69 | P | IN  |
| QL02311 | 1-{4-[(2H-1,3-Benzodioxol-5-yl)methyl]piperazin-1-yl}-2,2,3,3,4,4,4-heptafluorobutan-1-one | 546063-97-2 | FC(F)(F)C(F)(F)C(F)(F)C(=O)N1CCN(Cc2ccc3OCOc3c2)CC1                                                                  | -7.39 | 0.62 | 2.89 | P | OUT |
| QL02312 | 2,2,3,3,4,4,4-Heptafluoro-1-(piperazin-1-yl)butan-1-one                                    | 89245-13-6  | FC(F)(F)C(F)(F)C(F)(F)C(=O)N1CCNCC1                                                                                  | -6.23 | 0.63 | 2.17 | P | IN  |
| QL02313 | 2,2,3,3,4,4,4-Heptafluoro-1-(morpholin-4-yl)butan-1-one                                    | 425-20-7    | FC(F)(F)C(F)(F)C(F)(F)C(=O)N1CCOCC1                                                                                  | -6.23 | 0.63 | 2.17 | P | IN  |
| QL02314 | N,N'-1,3-Phenylenebis(perfluorobutanamide)                                                 | 524726-48-5 | FC(F)(F)C(F)(F)C(F)(F)C(=O)NC1=CC(NC(=O)C(F)(F)C(F)(F)C(F)F)=CC=C1                                                   | -8.03 | 0.65 | 2.83 | P | IN  |
| QL02315 | Butanamide, N,N'-(1,1'-biphenyl)-4,4'-diylbis(2,2,3,3,4,4,4-heptafluoro-                   | 75042-07-8  | FC(F)(F)C(F)(F)C(F)(F)C(=O)NC1=CC=C(C=C1)C1=CC=C(NC(=O)C(F)(F)C(F)(F)C(F)F)C=C1                                      | -8.46 | 0.64 | 3.18 | P | OUT |
| QL02316 | N,N'-(Methylenedi-1,4-phenylene)bis(perfluorobutanamide)                                   | 124232-75-3 | FC(F)(F)C(F)(F)C(F)(F)C(=O)NC1=CC=C(CC2=CC=C(NC(=O)C(F)(F)C(F)(F)C(F)F)C=C2)C=C1                                     | -8.56 | 0.64 | 3.27 | P | OUT |
| QL02317 | N,N'-1,4-Phenylenebis(perfluorobutanamide)                                                 | 524726-49-6 | FC(F)(F)C(F)(F)C(F)(F)C(=O)NC1=CC=C(NC(=O)C(F)(F)C(F)(F)C(F)F)C=C1                                                   | -8.10 | 0.65 | 2.86 | P | IN  |
| QL02318 | Al 3-18011                                                                                 | 336-61-8    | FC(F)(F)C(F)(F)C(F)(F)C(=O)NC1=CC=CC=C1                                                                              | -6.25 | 0.63 | 2.25 | P | OUT |
| QL02319 | Thiobenzyl N-heptafluorobutryrnanthranilate                                                | 82422-25-1  | FC(F)(F)C(F)(F)C(F)(F)C(=O)NC1=CC=CC=C1C(=O)SCC1=CC=CC=C1                                                            | -7.00 | 0.61 | 2.89 | P | OUT |
| QL02320 | N-2-Pyridinylperfluorobutanamide                                                           | 283172-09-8 | FC(F)(F)C(F)(F)C(F)(F)C(=O)NC1=CC=CC=N1                                                                              | -6.25 | 0.63 | 2.25 | P | OUT |
| QL02321 | 2,2,3,3,4,4,4-Heptafluoro-N-(2-oxo-2,3-dihydropyrimidin-4-yl)butanamide                    | 94720-20-4  | FC(F)(F)C(F)(F)C(F)(F)C(=O)NC1=CC=NC(=O)N1                                                                           | -6.38 | 0.63 | 2.24 | P | OUT |
| QL02322 | (2-Naphthalenyl)perfluorobutanamide                                                        | 582-00-3    | FC(F)(F)C(F)(F)C(F)(F)C(=O)NC1=CC2=CC=CC=C2C=C1                                                                      | -6.78 | 0.63 | 2.52 | P | OUT |
| QL02323 | N-(2,6-Dichlorophenyl)-2,2,3,3,4,4,4-heptafluorobutanamide                                 | 121806-69-7 | FC(F)(F)C(F)(F)C(F)(F)C(=O)Nc1c(Cl)cccc1Cl                                                                           | -6.42 | 0.64 | 2.20 | P | IN  |
| QL02324 | 2,2,3,3,4,4,4-Heptafluoro-N-(2,4,5-trichlorophenyl)butanamide                              | 121806-70-0 | FC(F)(F)C(F)(F)C(F)(F)C(=O)Nc1cc(Cl)c(Cl)cc1Cl                                                                       | -6.96 | 0.64 | 2.41 | P | IN  |
| QL02325 | N-(2,5-Dichlorophenyl)-2,2,3,3,4,4,4-heptafluorobutanamide                                 | 121806-67-5 | FC(F)(F)C(F)(F)C(F)(F)C(=O)Nc1cc(Cl)ccc1Cl                                                                           | -6.48 | 0.64 | 2.23 | P | IN  |
| QL02326 | N-(4-Bromophenyl)-2,2,3,3,4,4,4-heptafluorobutanamide                                      | 308-67-8    | FC(F)(F)C(F)(F)C(F)(F)C(=O)Nc1ccc(Br)cc1                                                                             | -6.81 | 0.64 | 2.44 | P | OUT |
| QL02327 | N-(4-Chlorophenyl)-2,2,3,3,4,4,4-heptafluorobutanamide                                     | 79497-98-6  | FC(F)(F)C(F)(F)C(F)(F)C(=O)Nc1ccc(Cl)cc1                                                                             | -6.81 | 0.64 | 2.44 | P | OUT |
| QL02328 | N-(2,4-Dichlorophenyl)-2,2,3,3,4,4,4-heptafluorobutanamide                                 | 121806-66-4 | FC(F)(F)C(F)(F)C(F)(F)C(=O)Nc1ccc(Cl)cc1Cl                                                                           | -6.85 | 0.64 | 2.42 | P | IN  |

|         |                                                                                 |              |                                                                   |       |      |      |   |     |
|---------|---------------------------------------------------------------------------------|--------------|-------------------------------------------------------------------|-------|------|------|---|-----|
| QL02329 | N-(3-Chlorophenyl)-2,2,3,3,4,4,4-heptafluorobutanamide                          | 106376-36-7  | FC(F)(F)C(F)(F)C(F)(F)C(=O)Nc1cccc(Cl)c1                          | -6.38 | 0.63 | 2.24 | P | OUT |
| QL02330 | N-(2,3-Dichlorophenyl)-2,2,3,3,4,4,4-heptafluorobutanamide                      | 121806-68-6  | FC(F)(F)C(F)(F)C(F)(F)C(=O)Nc1cccc(Cl)c1Cl                        | -6.49 | 0.64 | 2.23 | P | IN  |
| QL02331 | N-(9,10-Dioxo-9,10-dihydroanthracen-1-yl)-2,2,3,3,4,4,4-heptafluorobutanamide   | 162441-56-7  | FC(F)(F)C(F)(F)C(F)(F)C(=O)Nc1cccc2C(=O)c3cccc3C(=O)c12           | -7.08 | 0.63 | 2.67 | P | OUT |
| QL02332 | N-Cyclohexyl-2,2,3,3,4,4,4-heptafluorobutanamide                                | 56663-38-8   | FC(F)(F)C(F)(F)C(F)(F)C(=O)NC1CCCCC1                              | -6.25 | 0.63 | 2.25 | P | OUT |
| QL02333 | N-(2-Chlorophenyl)-2,2,3,3,4,4,4-heptafluorobutanamide                          | 121806-65-3  | FC(F)(F)C(F)(F)C(F)(F)C(=O)Nc1cccc1Cl                             | -6.36 | 0.63 | 2.23 | P | IN  |
| QL02334 | 2,2,3,3,4,4,4-Heptafluoro-N-(2-iodophenyl)butanamide                            | 378215-44-2  | FC(F)(F)C(F)(F)C(F)(F)C(=O)Nc1cccc1I                              | -6.36 | 0.63 | 2.23 | P | IN  |
| QL02335 | (1R-trans)-N,N'-1,2-Cyclohexanediylbis(perfluorobutanamide)                     | 133964-60-0  | FC(F)(F)C(F)(F)C(F)(F)C(=O)NC1CCCCC1NC(=O)C(F)(F)C(F)(F)C(F)(F)F  | -7.81 | 0.65 | 2.73 | P | IN  |
| QL02336 | 2,2,3,3,4,4,4-Heptafluoro-N-{1H-1,2,4-triazol-5-yl}butanamide                   | 70501-47-2   | FC(F)(F)C(F)(F)C(F)(F)C(=O)Nc1Nncn1                               | -6.29 | 0.64 | 2.17 | P | IN  |
| QL02337 | Allylperfluorobutanamide                                                        | 24429-61-6   | FC(F)(F)C(F)(F)C(F)(F)C(=O)NCC=C                                  | -6.07 | 0.63 | 2.20 | P | OUT |
| QL02338 | N-(Phenylmethyl)perfluorobutanamide                                             | 560-02-1     | FC(F)(F)C(F)(F)C(F)(F)C(=O)NCC1=CC=CC=C1                          | -6.46 | 0.62 | 2.42 | P | OUT |
| QL02339 | 2,2,3,3,4,4,4-Heptafluoro-N-{2-phenylethyl}butanamide                           | 29723-29-3   | FC(F)(F)C(F)(F)C(F)(F)C(=O)NCCC1=CC=CC=C1                         | -6.42 | 0.62 | 2.49 | P | OUT |
| QL02340 | 2,2,3,3,4,4,4-Heptafluoro-N-{3-phenylpropyl}butanamide                          | 77970-73-1   | FC(F)(F)C(F)(F)C(F)(F)C(=O)NCCCC1CCCC1                            | -6.58 | 0.61 | 2.64 | P | OUT |
| QL02341 | N,N'-bis(Perfluorobutanoyl)1,6-hexanediamine                                    | 123665-83-8  | FC(F)(F)C(F)(F)C(F)(F)C(=O)NCCCCCNC(=O)C(F)(F)C(F)(F)C(F)(F)F     | -7.89 | 0.64 | 2.98 | P | OUT |
| QL02342 | N,N'-bis(Perfluorobutanoyl)1,5-pentanediamine                                   | 1814-80-8    | FC(F)(F)C(F)(F)C(F)(F)C(=O)NCCCCCNC(=O)C(F)(F)C(F)(F)C(F)(F)F     | -7.92 | 0.64 | 2.94 | P | OUT |
| QL02343 | N,N'-bis(Perfluorobutanoyl)1,4-butanediamine                                    | 2967-59-1    | FC(F)(F)C(F)(F)C(F)(F)C(=O)NCCCCCNC(=O)C(F)(F)C(F)(F)C(F)(F)F     | -7.82 | 0.64 | 2.82 | P | IN  |
| QL02344 | n-(2-chloroethyl)-2,2,3,3,4,4,4-heptafluorobutanamide                           | 4314-29-8    | FC(F)(F)C(F)(F)C(F)(F)C(=O)NCCCCl                                 | -6.07 | 0.63 | 2.20 | P | OUT |
| QL02345 | N,N'-bis(Perfluorobutanoyl)1,3-propanediamine                                   | 149981-59-9  | FC(F)(F)C(F)(F)C(F)(F)C(=O)NCCCCCNC(=O)C(F)(F)C(F)(F)C(F)(F)F     | -7.86 | 0.65 | 2.77 | P | IN  |
| QL02346 | ST50925188                                                                      | 86273-64-5   | FC(F)(F)C(F)(F)C(F)(F)C(=O)NCCNC(=O)C(F)(F)C(F)(F)C(F)(F)F        | -7.76 | 0.66 | 2.65 | P | IN  |
| QL02347 | N'-Benzylidene-2,2,3,3,4,4,4-heptafluorobutanehydrazide                         | 736-62-9     | FC(F)(F)C(F)(F)C(F)(F)C(=O)NN=Cc1cccc1                            | -6.42 | 0.62 | 2.49 | P | OUT |
| QL02348 | 2,2,3,3,4,4,4-Heptafluoro-N'-[(pyridin-4-yl)methylidene]butanehydrazide         | 109373-81-1  | FC(F)(F)C(F)(F)C(F)(F)C(=O)NN=Cc1ccncc1                           | -6.42 | 0.62 | 2.49 | P | OUT |
| QL02349 | 2,2,3,3,4,4,4-heptafluoro-n'-(2,2,3,3,4,4,4-heptafluorobutanoyl)butanehydrazide | 648-19-1     | FC(F)(F)C(F)(F)C(F)(F)C(=O)NNC(=O)C(F)(F)C(F)(F)C(F)(F)F          | -7.71 | 0.67 | 2.45 | P | IN  |
| QL02350 | 2,2,3,3,4,4,4-Heptafluoro-N'-phenylbutanehydrazide                              | 77146-66-8   | FC(F)(F)C(F)(F)C(F)(F)C(=O)NNc1cccc1                              | -6.46 | 0.62 | 2.42 | P | OUT |
| QL02351 | 4-Chlorophenyl (2,2,3,3,4,4,4-heptafluorobutanoyl)sulfamate                     | 1443258-17-0 | FC(F)(F)C(F)(F)C(F)(F)C(=O)NS(=O)(=O)Oc1ccc(Cl)cc1                | -7.35 | 0.64 | 2.68 | P | OUT |
| QL02352 | Heptafluorobutanoic anhydride                                                   | NOCAS_861881 | FC(F)(F)C(F)(F)C(F)(F)C(=O)OC(=O)C(F)(F)C(F)(F)C(F)(F)F           | -7.72 | 0.67 | 2.38 | P | IN  |
| QL02353 | 1,1,1,3,3,3-Hexafluoro-2-(trifluoromethyl)propan-2-yl heptafluorobutanoate      | 922168-38-5  | FC(F)(F)C(F)(F)C(F)(F)C(=O)OC(C(F)(F)F)C(F)(F)C(F)(F)F            | -6.95 | 0.67 | 1.96 | P | IN  |
| QL02354 | Vinyl perfluorobutyrate                                                         | 356-28-5     | FC(F)(F)C(F)(F)C(F)(F)C(=O)OC=C                                   | -5.78 | 0.63 | 1.93 | P | IN  |
| QL02355 | Decane-1,10-diyl bis(heptafluorobutanoate)                                      | 426-64-2     | FC(F)(F)C(F)(F)C(F)(F)C(=O)OCCCCCCCCCOC(=O)C(F)(F)C(F)(F)C(F)(F)F | -8.03 | 0.62 | 3.27 | P | OUT |
| QL02356 | bis(heptafluorobutryl)peroxide                                                  | 336-64-1     | FC(F)(F)C(F)(F)C(F)(F)C(=O)OOC(=O)C(F)(F)C(F)(F)C(F)(F)F          | -7.71 | 0.67 | 2.45 | P | IN  |
| QL02357 | 2,2,3,3,4,4,4-Heptafluoro-1-(morpholin-4-yl)butane-1-thione                     | 1206684-15-2 | FC(F)(F)C(F)(F)C(F)(F)C(=S)N1CCOCC1                               | -6.23 | 0.63 | 2.17 | P | IN  |
| QL02358 | 2,2,3,3,4,4,4-Heptafluoro-N-phenylbutanethioamide                               | 61881-12-7   | FC(F)(F)C(F)(F)C(F)(F)C(=S)NC1=CC=CC=C1                           | -6.25 | 0.63 | 2.25 | P | OUT |
| QL02359 | 2-bromo-1,1,1,3,3,4,4,5,5,5-decafluoro-2-(trifluoromethyl)pentane               | 22528-67-2   | FC(F)(F)C(F)(F)C(F)(F)C(Br)C(F)(F)C(F)(F)F                        | -6.74 | 0.68 | 1.72 | P | IN  |
| QL02360 | 2-bromo-3,3,4,4,5,5,5-heptafluoropent-1-ene                                     | 96916-53-9   | FC(F)(F)C(F)(F)C(F)(F)C(Br)=C                                     | -5.76 | 0.67 | 1.46 | P | IN  |
| QL02361 | heptafluorobutanoyl bromide                                                     | 375-13-3     | FC(F)(F)C(F)(F)C(F)(F)C(Br)=O                                     | -5.76 | 0.67 | 1.46 | P | IN  |
| QL02362 | 4,5-Dibromo-1,1,1,2,2,3,3-heptafluoropentane                                    | 377-46-8     | FC(F)(F)C(F)(F)C(F)(F)C(Br)CBr                                    | -5.98 | 0.65 | 1.84 | P | IN  |
| QL02363 | 1,1,1,2,2,3,3,5,6,6,6-Undecafluoro-4,4,5-tris(trifluoromethyl)hexane            | 86714-23-0   | FC(F)(F)C(F)(F)C(F)(F)C(C(F)(F)F)C(F)(F)C(F)(F)C(F)(F)F           | -6.83 | 0.68 | 1.79 | P | IN  |
| QL02364 | 1,1,1,2,2,3,3,5,5,5-Decafluoro-4,4-bis(trifluoromethyl)pentane                  | 29971-79-7   | FC(F)(F)C(F)(F)C(F)(F)C(C(F)(F)F)C(F)(F)C(F)(F)F                  | -6.49 | 0.68 | 1.63 | P | IN  |

|         |                                                                                                                                            |              |                                                                                                                                                 |
|---------|--------------------------------------------------------------------------------------------------------------------------------------------|--------------|-------------------------------------------------------------------------------------------------------------------------------------------------|
| QL02365 | 4,4,5,5,6,6,6-Heptafluoro-3,3-bis(trifluoromethyl)hex-1-ene                                                                                | 79272-26-7   | FC(F)(F)C(F)(F)C(F)C(C=C)(C(F)(F)F)C(F)(F)F                                                                                                     |
| QL02366 | 1-bromo-4,4,5,5,6,6,6-heptafluoro-3,3-bis(trifluoromethyl)hex-1-ene                                                                        | 128454-94-4  | FC(F)(F)C(F)(F)C(F)C(F)C(C=Br)(C(F)(F)F)C(F)(F)F                                                                                                |
| QL02367 | 6,6,7,7,8,8-Heptafluoro-5,5-bis(trifluoromethyl)octa-1,3-diene                                                                             | 1429188-77-1 | FC(F)(F)C(F)(F)C(F)C(F)C(C=CC=C)(C(F)(F)F)C(F)(F)F                                                                                              |
| QL02368 | 4,4,5,5,6,6,6-heptafluoro-1-iodo-3,3-bis(trifluoromethyl)hex-1-ene<br>(Perfluoropropyl)-2-(2-phenylhydrazinylidene)ethanal phenylhydrazone | 126681-21-8  | FC(F)(F)C(F)(F)C(F)C(F)C(C=Cl)(C(F)(F)F)C(F)(F)F                                                                                                |
| QL02369 | 2,2'-(2,2,3,3,4,4,4-Heptafluorobutane-1,1-diyl)di(1H-pyrrole)                                                                              | 57912-15-9   | FC(F)(F)C(F)(F)C(F)C(F)C(C=NNC1=CC=CC=C1)=NNC1=CC=CC=C1                                                                                         |
| QL02370 |                                                                                                                                            | 164792-01-2  | FC(F)(F)C(F)(F)C(F)(F)C(F)C(c1Ncccc1)c1Ncccc1                                                                                                   |
| QL02371 | (6E)-1,1,1,2,2,3,3,10,10,11,11,12,12,12-Tetradecafluoro-4,4,9,9-tetrakis(trifluoromethyl)dodec-6-ene                                       | 1946796-71-9 | FC(F)(F)C(F)(F)C(F)C(F)C(CC=CCC(C(F)(F)F)(C(F)(F)F)C(F)C(F)(F)C(F)(F)F)(C(F)(F)F)C(F)(F)F                                                       |
| QL02372 | Bis(4-[3,3,4,4,5,5,5-heptafluoro-2,2-bis(trifluoromethyl)pentyl]phenyl)(phenyl)phosphane                                                   | 322647-83-6  | FC(F)(F)C(F)(F)C(F)C(F)C(C1C1=CC=C(C=C1)P(C1=CC=CC=C1)C1=CC=C(C(C(C(F)(F)F)(C(F)(F)C(F)C(F)C(F)F)C(F)F)C=C1)(C(F)(F)C(F)(F)F                    |
| QL02373 | 1-Bromo-4-[3,3,4,4,5,5-heptafluoro-2,2-bis(trifluoromethyl)pentyl]benzene                                                                  | 149068-60-0  | FC(F)(F)C(F)(F)C(F)C(F)C(Cc1cccc(Br)cc1)(C(F)(F)F)C(F)(F)F                                                                                      |
| QL02374 | Tris(4-[3,3,4,4,5,5,5-heptafluoro-2,2-bis(trifluoromethyl)pentyl]phenyl)phosphane                                                          | 322647-82-5  | FC(F)(F)C(F)(F)C(F)C(F)C(Cc1cccc(cc1)P(c1cccc(CC(C(F)(F)F)(C(F)(F)C(F)C(F)C(F)F)cc1)c1cccc(CC(C(F)(F)F)(C(F)(F)C(F)C(F)C(F)F)C(F)C(F)F)C(F)(F)F |
| QL02375 | 2-[3,3,4,4,5,5-Heptafluoro-2,2-bis(trifluoromethyl)pentyl]oxirane                                                                          | 119285-89-1  | FC(F)(F)C(F)(F)C(F)C(F)C(C1C1CO1)(C(F)(F)C(F)(F)F                                                                                               |
| QL02376 | 6-Bromo-1,1,1,2,2,3,3-heptafluoro-4,4-bis(trifluoromethyl)hexane                                                                           | 128454-91-1  | FC(F)(F)C(F)(F)C(F)C(F)C(CCBBr)(C(F)(F)F)C(F)(F)F                                                                                               |
| QL02377 | 1,1,1,2,2,3,3-heptafluoro-6-iodo-4,4-bis(trifluoromethyl)hexane                                                                            | 115347-68-7  | FC(F)(F)C(F)(F)C(F)C(F)C(CCI)(C(F)(F)F)C(F)(F)F                                                                                                 |
| QL02378 | 2-Chloro(perfluoro-2-methylpentane)                                                                                                        | 67437-97-2   | FC(F)(F)C(F)(F)C(F)C(F)C(Cl)(C(F)(F)F)C(F)(F)F                                                                                                  |
| QL02379 | Trichloroheptafluorobutane                                                                                                                 | 28984-80-7   | FC(F)(F)C(F)(F)C(F)(F)C(Cl)(Cl)Cl                                                                                                               |
| QL02380 | Heptafluorobutyl Chloride                                                                                                                  | 375-16-6     | FC(F)(F)C(F)(F)C(F)(F)C(Cl)=O                                                                                                                   |
| QL02381 | 4,5-Dichloro-1,1,1,2,2,3,3-heptafluoropentane                                                                                              | 577773-57-0  | FC(F)(F)C(F)(F)C(F)(F)C(Cl)CCl                                                                                                                  |
| QL02382 | 1,1,1,2,4,5,5,6,6,7,7,7-dodecafluoro-2,4-bis(trifluoromethyl)heptan-3-one                                                                  | 95639-15-9   | FC(F)(F)C(F)(F)C(F)C(F)C(F)C(=O)C(F)(C(F)(F)F)C(F)(F)C(F)C(F)F                                                                                  |
| QL02383 | Hexane, 1,1,1,2,2,3,3,4,4,5,5,6,6-tridecafluoro-4-(trifluoromethyl)-                                                                       | 558-69-0     | FC(F)(F)C(F)(F)C(F)C(F)C(F)(C(F)(F)C(F)C(F)(F)F                                                                                                 |
| QL02384 | Perfluoroisohexane                                                                                                                         | 355-04-4     | FC(F)(F)C(F)(F)C(F)(F)C(F)(C(F)(F)F)C(F)(F)F                                                                                                    |
| QL02385 | Chromium pentacarbonyl[perfluoro-4-(isocyanob-βC)butane]                                                                                   | 106065-05-8  | FC(F)(F)C(F)(F)C(F)C(F)C(F)N#[C-][Cr]([C-]#[O+])([C-]#[O+])([C-]#[O+])([C-]#[O+])                                                               |
| QL02386 | 1-Bromoperfluorobutane                                                                                                                     | 375-48-4     | FC(F)(F)C(F)(F)C(F)(F)C(F)Br                                                                                                                    |
| QL02387 | 1-(4-Bromophenyl)-2,2,3,3,4,4,5,5,5-nonafluoropentan-1-one                                                                                 | 1228786-80-8 | FC(F)(F)C(F)(F)C(F)C(F)C(F)C(=O)c1cccc(Br)cc1                                                                                                   |
| QL02388 | 2-(2,2,3,3,4,4,5,5,5-Nonafluoropentanyl)cyclopentan-1-one                                                                                  | 347361-45-9  | FC(F)(F)C(F)(F)C(F)C(F)C(F)C(=O)C1CCCC1=O                                                                                                       |
| QL02389 | 1,1,1,2,2,3,3,4,4,8,8,9,9,10,10,11,11,11-Octadecafluoroundecane-5,7-dione                                                                  | 261503-82-6  | FC(F)(F)C(F)(F)C(F)C(F)C(F)C(=O)CC(=O)C(F)(F)C(F)(F)C(F)(F)C(F)(F)F                                                                             |
| QL02390 | 4,4,5,5,6,6,7,7,7-Nonafluoro-1-phenylheptane-1,3-dione                                                                                     | 168920-97-6  | FC(F)(F)C(F)(F)C(F)(F)C(F)C(F)C(=O)CC(=O)c1ccccc1                                                                                               |
| QL02391 | 3,5-Bis(perfluorohexyl)-1-(nonafluoropentanyl)-1H-pyrazole                                                                                 | 231630-88-9  | FC(F)(F)C(F)(F)C(F)C(F)C(F)C(=O)N1N=C(C=C1C(F)(F)C(F)C(F)C(F)C(F)C(F)C(F)C(F)C(F)C(F)C(F)C(F)C(F)C(F)C(F)C(F)F                                  |
| QL02392 | 2,2,3,3,4,4,5,5,5-Nonafluoro-N-phenylpentanamide                                                                                           | 122590-97-0  | FC(F)(F)C(F)(F)C(F)(F)C(F)C(F)C(=O)Nc1ccccc1                                                                                                    |
| QL02393 | N,N'-bis(Perfluoropentanyl)1,2-ethanediamine                                                                                               | 119403-53-1  | FC(F)(F)C(F)(F)C(F)C(F)C(F)C(=O)NCCNC(=O)C(F)(F)C(F)(F)C(F)(F)C(F)(F)F                                                                          |
| QL02394 | Sodium perfluorovalerate                                                                                                                   | 2706-89-0    | FC(F)(F)C(F)(F)C(F)(F)C(F)C(=O)[Na]                                                                                                             |
| QL02395 | Perfluoropentanoic anhydride                                                                                                               | 308-28-1     | FC(F)(F)C(F)(F)C(F)(F)C(F)C(=O)OC(=O)C(F)(F)C(F)(F)C(F)(F)C(F)(F)F                                                                              |
| QL02396 | Vinyl perfluorovalerate                                                                                                                    | 424-37-3     | FC(F)(F)C(F)(F)C(F)(F)C(F)C(F)C(=O)OC=C                                                                                                         |
| QL02397 | Allyl perfluoropentanoate                                                                                                                  | 84145-17-5   | FC(F)(F)C(F)(F)C(F)(F)C(F)C(=O)OCC=C                                                                                                            |
| QL02398 | 3-(Trifluorostyryl)propyl nonafluoropentanoate                                                                                             | 92916-37-5   | FC(F)(F)C(F)(F)C(F)(F)C(F)C(F)C(=O)OCCc1ccc(Si(F)(F)F)cc1                                                                                       |
| QL02399 | 1,1,2-Tribromo-1-(nonafluorobutyl)ethane                                                                                                   | 59665-24-6   | FC(F)(F)C(F)(F)C(F)(F)C(F)C(Br)Br                                                                                                               |
| QL02400 | 2-Bromo-3,3,4,4,5,5,6,6,6-nonafluorohex-1-ene                                                                                              | 59665-23-5   | FC(F)(F)C(F)(F)C(F)(F)C(F)C(Br)=C                                                                                                               |
| QL02401 | Nonafluoropentanyl bromide                                                                                                                 | 159623-35-5  | FC(F)(F)C(F)(F)C(F)(F)C(F)C(Br)=O                                                                                                               |
| QL02402 | 5,6-dibromo-1,1,1,2,2,3,3,4,4-nonafluorohexane                                                                                             | 236736-19-9  | FC(F)(F)C(F)(F)C(F)(F)C(F)C(Br)CBr                                                                                                              |
| QL02403 | 2-Chloro-3,3,4,4,5,5,6,6,6-nonafluorohex-1-ene                                                                                             | 110927-72-5  | FC(F)(F)C(F)(F)C(F)(F)C(F)C(F)C(Cl)=C                                                                                                           |



|         |                                                                                              |              |                                                                                                                                     |       |      |      |   |     |
|---------|----------------------------------------------------------------------------------------------|--------------|-------------------------------------------------------------------------------------------------------------------------------------|-------|------|------|---|-----|
| QL02404 | Nonafluoropentanol chloride                                                                  | 375-60-0     | FC(F)(F)C(F)(F)C(F)(F)C(F)(F)C(Cl)=O                                                                                                | -6.61 | 0.67 | 1.81 | P | IN  |
| QL02405 | 5,6-Dichloro-1,1,1,2,2,3,3,4,4-nonafluorohexane                                              | 136483-77-7  | FC(F)(F)C(F)(F)C(F)(F)C(F)(F)C(Cl)CCl                                                                                               | -6.37 | 0.66 | 1.90 | P | IN  |
| QL02406 | Perfluoro-3-methylheptane                                                                    | 153273-33-7  | FC(F)(F)C(F)(F)C(F)(F)C(F)(F)C(F)(F)C(F)(F)F                                                                                        | -7.59 | 0.69 | 2.10 | P | IN  |
| QL02407 | 2,2,3,3,4,4,5,5,6,6,6-Undecafluoro-N-(2-phenylethyl)hexanamide                               | 70414-01-6   | FC(F)(F)C(F)(F)C(F)(F)C(F)(F)C(F)(F)C(=O)NCCc1ccccc1                                                                                | -7.45 | 0.64 | 2.76 | P | OUT |
| QL02408 | Perfluorohexanoic anhydride                                                                  | 308-13-4     | FC(F)(F)C(F)(F)C(F)(F)C(F)(F)C(F)(F)C(=O)OC(=O)C(F)(F)C(F)(F)C(F)(F)C(F)(F)F                                                        | -8.87 | 0.68 | 2.84 | P | OUT |
| QL02409 | Ethenyl undecafluorohexanoate                                                                | 464-35-7     | FC(F)(F)C(F)(F)C(F)(F)C(F)(F)C(F)(F)C(=O)OC=C                                                                                       | -6.91 | 0.65 | 2.24 | P | IN  |
| QL02410 | Undecafluorohexanoyl chloride                                                                | 335-53-5     | FC(F)(F)C(F)(F)C(F)(F)C(F)(F)C(F)(F)C(Cl)=O                                                                                         | -6.91 | 0.68 | 1.90 | P | IN  |
| QL02411 | 1,2-Dibromoperfluoroheptane                                                                  | 678-32-0     | FC(F)(F)C(F)(F)C(F)(F)C(F)(F)C(F)(F)C(F)(Br)C(F)(F)Br                                                                               | -7.74 | 0.69 | 2.15 | P | IN  |
| QL02412 | Perfluoro-2-methylheptane                                                                    | 153273-32-6  | FC(F)(F)C(F)(F)C(F)(F)C(F)(F)C(F)(F)C(F)(C(F)(F)F)C(F)(F)F                                                                          | -7.59 | 0.69 | 2.10 | P | IN  |
| QL02413 | (Perfluorohexyl)hexadecene                                                                   | 1244062-15-4 | FC(F)(F)C(F)(F)C(F)(F)C(F)(F)C(F)(F)C(F)(F)C(F)(F)/C=C/CCCCCCCCCCCCC[H]                                                             | -7.92 | 0.60 | 3.47 | P | OUT |
| QL02414 | Perfluorohexylbromide                                                                        | 335-56-8     | FC(F)(F)C(F)(F)C(F)(F)C(F)(F)C(F)(F)C(F)(F)C(F)(F)Br                                                                                | -7.19 | 0.69 | 1.90 | P | IN  |
| QL02415 | N-(2,2,3,3,4,4,5,5,6,6,7,7,7-Tridecafluoroheptanimidoyl)benzenecarboximidamide               | 123528-68-7  | FC(F)(F)C(F)(F)C(F)(F)C(F)(F)C(F)(F)C(F)(F)C(=N)NC(=N)c1ccccc1                                                                      | -7.82 | 0.65 | 2.76 | P | IN  |
| QL02416 | N-[(2,2,3,3,4,4,5,5,6,6,7,7,7-Tridecafluoroheptanimidoyl)oxy]benzenecarboximidamide          | 146304-61-2  | FC(F)(F)C(F)(F)C(F)(F)C(F)(F)C(F)(F)C(F)(F)C(=N)ONC(=N)c1ccccc1                                                                     | -8.00 | 0.65 | 2.90 | P | IN  |
| QL02417 | 2-(2,2,3,3,4,4,5,5,6,6,7,7,7-Tridecafluoroheptanoyl)cyclohexan-1-one                         | 141478-89-9  | FC(F)(F)C(F)(F)C(F)(F)C(F)(F)C(F)(F)C(F)(F)C(=O)C1CCCCC1=O                                                                          | -7.57 | 0.66 | 2.51 | P | IN  |
| QL02418 | 8H,8H-Perfluoropentadecane-7,9-dione                                                         | 261503-74-6  | FC(F)(F)C(F)(F)C(F)(F)C(F)(F)C(F)(F)C(F)(F)C(=O)CC(=O)C(F)(F)C(F)(F)C(F)(F)C(F)(F)C(F)(F)F                                          | -9.31 | 0.68 | 3.03 | P | OUT |
| QL02419 | 4,4,5,5,6,6,7,7,8,8,9,9-Tridecafluoro-1-phenylnonane-1,3-dione                               | 99338-16-6   | FC(F)(F)C(F)(F)C(F)(F)C(F)(F)C(F)(F)C(F)(F)C(=O)CC(=O)C1=CC=CC=C1                                                                   | -7.82 | 0.65 | 2.76 | P | IN  |
| QL02420 | 7,7,8,8,9,10,10,11,11,12,12,12-Tridecafluoro-1-{1H-naphtho[2,3-d]imidazol-2-yl}dodecan-6-one | 240121-57-7  | FC(F)(F)C(F)(F)C(F)(F)C(F)(F)C(F)(F)C(F)(F)C(F)(F)C(=O)CCCCc1Nc2cc3ccccc3cc2n1                                                      | -8.31 | 0.63 | 3.22 | P | OUT |
| QL02421 | 1-(1H-Benzimidazol-2-yl)-7,7,8,8,9,9,10,10,11,11,12,12,12-tridecafluorododecan-6-one         | 237738-71-5  | FC(F)(F)C(F)(F)C(F)(F)C(F)(F)C(F)(F)C(F)(F)C(=O)CCCCc1Nc2ccccc2n1                                                                   | -8.10 | 0.64 | 3.10 | P | OUT |
| QL02422 | 2,2,3,3,4,4,5,5,6,6,7,7,7-Tridecafluoro-1-(morpholin-4-yl)heptan-1-one                       | 144237-77-4  | FC(F)(F)C(F)(F)C(F)(F)C(F)(F)C(F)(F)C(F)(F)C(=O)N1CCOCC1                                                                            | -7.52 | 0.66 | 2.52 | P | IN  |
| QL02423 | N-Cyclohexyl-2,2,3,3,4,4,5,5,6,6,7,7,7-tridecafluoroheptanamide                              | 73602-45-6   | FC(F)(F)C(F)(F)C(F)(F)C(F)(F)C(F)(F)C(F)(F)C(=O)NC1CCCCC1                                                                           | -7.78 | 0.65 | 2.71 | P | IN  |
| QL02424 | Sodium perfluoroheptanoate                                                                   | 20109-59-5   | FC(F)(F)C(F)(F)C(F)(F)C(F)(F)C(F)(F)C(F)(F)C(=O)[O][Na]                                                                             | -7.32 | 0.67 | 2.24 | P | IN  |
| QL02425 | Perfluoroheptanoic anhydride                                                                 | 78225-99-7   | FC(F)(F)C(F)(F)C(F)(F)C(F)(F)C(F)(F)C(F)(F)C(=O)OC(=O)C(F)(F)C(F)(F)C(F)(F)C(F)(F)C(F)(F)F                                          | -9.31 | 0.68 | 3.03 | P | OUT |
| QL02426 | Ethenyl tridecafluoroheptanoate                                                              | 240408-96-2  | FC(F)(F)C(F)(F)C(F)(F)C(F)(F)C(F)(F)C(F)(F)C(=O)OC=C                                                                                | -7.48 | 0.66 | 2.45 | P | IN  |
| QL02427 | Prop-2-en-1-yl tridecafluoroheptanoate                                                       | 53378-90-8   | FC(F)(F)C(F)(F)C(F)(F)C(F)(F)C(F)(F)C(F)(F)C(=O)OCC=C                                                                               | -7.43 | 0.65 | 2.52 | P | IN  |
| QL02428 | 7,7,8-Tribromo-1,1,1,2,2,3,3,4,4,5,5,6,6-tridecafluorooctane                                 | 59665-25-7   | FC(F)(F)C(F)(F)C(F)(F)C(F)(F)C(F)(F)C(F)(F)C(F)(Br)CBr                                                                              | -7.58 | 0.68 | 2.23 | P | IN  |
| QL02429 | 2-Bromo-2-(Perfluorohexyl)ethene                                                             | 51249-64-0   | FC(F)(F)C(F)(F)C(F)(F)C(F)(F)C(F)(F)C(F)(F)C(F)(Br)=C                                                                               | -7.50 | 0.68 | 2.16 | P | IN  |
| QL02430 | (1Z)-1,2-Dibromo-3,3,4,4,5,5,6,6,7,7,8,8,8-tridecafluorooct-1-ene                            | 59665-28-0   | FC(F)(F)C(F)(F)C(F)(F)C(F)(F)C(F)(F)C(F)(F)C(F)(Br)=CBr                                                                             | -7.32 | 0.67 | 2.24 | P | IN  |
| QL02431 | tridecafluoroheptanoyl bromide                                                               | 159623-34-4  | FC(F)(F)C(F)(F)C(F)(F)C(F)(F)C(F)(F)C(F)(F)C(F)(Br)=O                                                                               | -7.50 | 0.68 | 2.16 | P | IN  |
| QL02432 | 7,8-Dibromo-1,1,1,2,2,3,3,4,4,5,5,6,6-tridecafluorooctane                                    | 51249-62-8   | FC(F)(F)C(F)(F)C(F)(F)C(F)(F)C(F)(F)C(F)(F)C(F)(Br)CBr                                                                              | -7.32 | 0.67 | 2.24 | P | IN  |
| QL02433 | Perfluoroheptanoyl chloride                                                                  | 52447-22-0   | FC(F)(F)C(F)(F)C(F)(F)C(F)(F)C(F)(F)C(F)(F)C(F)(Cl)=O                                                                               | -7.50 | 0.68 | 2.16 | P | IN  |
| QL02434 | 7,8-Dichloro-1,1,1,2,2,3,3,4,4,5,5,6,6-tridecafluorooctane                                   | 319490-55-6  | FC(F)(F)C(F)(F)C(F)(F)C(F)(F)C(F)(F)C(F)(F)C(F)(Cl)CCl                                                                              | -7.32 | 0.67 | 2.24 | P | IN  |
| QL02435 | 1-Bromopentadecafluoroheptane                                                                | 375-88-2     | FC(F)(F)C(F)(F)C(F)(F)C(F)(F)C(F)(F)C(F)(F)C(F)(F)Br                                                                                | -7.74 | 0.69 | 2.15 | P | IN  |
| QL02436 | 9H,9H-Triacontafluoro-8,10-heptadecanedione                                                  | 36554-97-9   | FC(F)(F)C(F)(F)C(F)(F)C(F)(F)C(F)(F)C(F)(F)C(F)(F)C(=O)CC(=O)C(F)(F)C(F)(F)C(F)(F)C(F)(F)C(F)(F)C(F)(F)F                            | -9.68 | 0.69 | 3.19 | P | OUT |
| QL02437 | (1R,2R)-N,N'-bis(Perfluorooctanoyl)-1,2-cyclohexanediamine                                   | 864149-62-2  | FC(F)(F)C(F)(F)C(F)(F)C(F)(F)C(F)(F)C(F)(F)C(F)(F)C(=O)N[C@@H]1CCCC[C@H]1NC(=O)C(F)(F)C(F)(F)C(F)(F)C(F)(F)C(F)(F)C(F)(F)F          | -9.70 | 0.67 | 3.40 | P | OUT |
| QL02438 | 3,4-Bis((perfluoro-1-oxooctyl)amino)benzenesulfonyl chloride                                 | 24216-05-5   | FC(F)(F)C(F)(F)C(F)(F)C(F)(F)C(F)(F)C(F)(F)C(F)(F)C(=O)NC1=C(NC(=O)C(F)(F)C(F)(F)C(F)(F)C(F)(F)C(F)(F)C(F)(F)F)C=C(C=C1)S(Cl)(=O)=O | -9.76 | 0.67 | 3.39 | P | OUT |
| QL02439 | N,N'-(Propane-1,3-diyl)bis(2,2,3,3,4,4,5,5,6,6,7,7,8,8,8-pentadecafluorooctanamide)          | 29680-98-6   | FC(F)(F)C(F)(F)C(F)(F)C(F)(F)C(F)(F)C(F)(F)C(F)(F)C(=O)NCCCCNC(=O)C(F)(F)C(F)(F)C(F)(F)C(F)(F)C(F)(F)C(F)(F)F                       | -9.75 | 0.67 | 3.42 | P | OUT |
| QL02440 | Perfluorooctanoic anhydride                                                                  | 33496-48-9   | FC(F)(F)C(F)(F)C(F)(F)C(F)(F)C(F)(F)C(F)(F)C(F)(F)C(=O)OC(=O)C(F)(F)C(F)(F)C(F)(F)C(F)(F)C(F)(F)F                                   | -9.68 | 0.69 | 3.19 | P | OUT |
| QL02441 | Vinyl perfluorooctanoate                                                                     | 307-93-7     | FC(F)(F)C(F)(F)C(F)(F)C(F)(F)C(F)(F)C(F)(F)C(F)(F)C(=O)OC=C                                                                         | -7.71 | 0.66 | 2.51 | P | IN  |





[illegible]

[illegible]





[illegible]







[illegible]

|         |                                                                                                                                                                                                     |             |                                                                                                                                                                                                                                                 |
|---------|-----------------------------------------------------------------------------------------------------------------------------------------------------------------------------------------------------|-------------|-------------------------------------------------------------------------------------------------------------------------------------------------------------------------------------------------------------------------------------------------|
|         | 1-(1,1,2,2,3,3,4,4,5,5,6,7,7,8,8-Heptadecafluorooctane-1-sulfonyl)piperazine                                                                                                                        | 113584-32-0 | FC(F)(F)C(F)(F)C(F)(F)C(F)(F)C(F)(F)C(F)(F)S(=O)=O)N1CCNC1                                                                                                                                                                                      |
| QL02709 | 4-(1,1,2,2,3,3,4,4,5,5,6,6,7,7,8,8-Heptadecafluorooctane-1-sulfonyl)morpholine                                                                                                                      | 312-19-6    | FC(F)(F)C(F)(F)C(F)(F)C(F)(F)C(F)(F)C(F)(F)S(=O)=O)N1CCOC1                                                                                                                                                                                      |
| QL02710 | N-(1,1,2,2,3,3,4,4,5,5,6,6,7,7,8,8-Heptadecafluorooctane-1-sulfonyl)benzamide                                                                                                                       | 87988-75-8  | FC(F)(F)C(F)(F)C(F)(F)C(F)(F)C(F)(F)C(F)(F)S(=O)=O)NC(=O)C1=CC=CC=C1                                                                                                                                                                            |
| QL02711 | 1,1,2,2,3,3,4,4,5,5,6,6,7,7,8,8-Hepta-decafluo-ro-N-(2-o-xocyclooctyl)octane-1-sulfonamide                                                                                                          | 240801-56-3 | FC(F)(F)C(F)(F)C(F)(F)C(F)(F)C(F)(F)C(F)(F)S(=O)=O)NCCCCCCC1=O                                                                                                                                                                                  |
| QL02712 | 2-[(Perfluorooctane-1-sulfonyl)amino]ethyl prop-2-enolate                                                                                                                                           | 60194-47-0  | FC(F)(F)C(F)(F)C(F)(F)C(F)(F)C(F)(F)C(F)(F)S(=O)=O)NCCOC(=O)C=C                                                                                                                                                                                 |
| QL02713 | Bis[Perfluoroocetyl)sulfonyl]amine                                                                                                                                                                  | 39847-41-1  | FC(F)(F)C(F)(F)C(F)(F)C(F)(F)C(F)(F)C(F)(F)S(=O)=O)NS(=O)=O)C(F)(F)C(F)(F)C(F)(F)C(F)(F)C(F)(F)                                                                                                                                                 |
| QL02714 | Perfluoro-1-octanesulfonyl chloride                                                                                                                                                                 | 423-60-9    | FC(F)(F)C(F)(F)C(F)(F)C(F)(F)C(F)(F)C(F)(F)S(Cl)=(O)=O                                                                                                                                                                                          |
| QL02715 | Perfluorooctanenitrile                                                                                                                                                                              | 647-12-1    | FC(F)(F)C(F)(F)C(F)(F)C(F)(F)C(F)(F)C(F)(F)C#N                                                                                                                                                                                                  |
| QL02716 | (Perfluoroheptyl)ethene                                                                                                                                                                             | 25431-45-2  | FC(F)(F)C(F)(F)C(F)(F)C(F)(F)C(F)(F)C=C                                                                                                                                                                                                         |
| QL02717 | (8E)-<br>1,1,1,2,2,3,3,4,4,5,5,6,6,7,7,10,10,<br><br>11,12,12,13,13,14,14<br><br>15,15,16,16-Triacontafluorohexadec-8-ene                                                                           | 35709-15-0  | FC(F)(F)C(F)(F)C(F)(F)C(F)(F)C(F)(F)C(F)(F)C=C(C(F)(F)C(F)(F)C(F)(F)C(F)(F)C(F)(F)C(F)(F))F                                                                                                                                                     |
| QL02718 | AC1LBTUH                                                                                                                                                                                            | 29723-33-9  | FC(F)(F)C(F)(F)C(F)(F)C(F)(F)C(F)(F)C=NCCCC1=CC=CC=C1                                                                                                                                                                                           |
| QL02719 | p-(Pentadecafluoroheptyl)benzenesulphonyl chloride                                                                                                                                                  | 25444-35-3  | FC(F)(F)C(F)(F)C(F)(F)C(F)(F)C(F)(F)C(F)(F)c1=CC=C(c1)S(Cl)=(O)=O                                                                                                                                                                               |
| QL02720 | 2,4,6-Tris(pentadecafluoroheptyl)-1,3,5-triazine                                                                                                                                                    | 21674-38-4  | FC(F)(F)C(F)(F)C(F)(F)C(F)(F)C(F)(F)c1=NC=(n=c1)C(F)(F)C(F)(F)C(F)(F)C(F)(F)C(F)(F)C(F)(F)C(F)(F)C(F)(F)F                                                                                                                                       |
| QL02721 | 2,2-Diazo-2,2-dihydro-4,6-bis(pentadecafluoroheptyl)1,3,5,2-triazaphosphorine                                                                                                                       | 95215-99-9  | FC(F)(F)C(F)(F)C(F)(F)C(F)(F)C(F)(F)C(F)(F)c1=np(n=[n+]=[n-])N([n+]=[n-]))=nc(=n1)C(F)(F)C(F)(F)C(F)(F)C(F)(F)C(F)(F)C(F)(F)F                                                                                                                   |
| QL02722 | 5-(Pentadecafluoroheptyl)-1H-imidazole                                                                                                                                                              | 81769-55-3  | FC(F)(F)C(F)(F)C(F)(F)C(F)(F)C(F)(F)C(F)(F)c1nCnc1                                                                                                                                                                                              |
| QL02723 | 1,1,1,2,2,3,3,4,4,5,5,6,6,7,7,14,14,<br><br>15,15,16,16,Triacontafluoro-9,12-diiodoicosane                                                                                                          | 25474-72-0  | FC(F)(F)C(F)(F)C(F)(F)C(F)(F)C(F)(F)C(F)(F)C(CC(I)CCC(I)CC(F)(F)C(F)(F)C(F)(F)C(F)(F)C(F)(F)F                                                                                                                                                   |
| QL02724 | 1 OH-substituted n2 fluorotelomer sulfonic acids, n=7                                                                                                                                               |             | FC(F)(F)C(F)(F)C(F)(F)C(F)(F)C(F)(F)C(F)(F)CC(O)S(=O)(O)=O                                                                                                                                                                                      |
| QL02725 | 2-(2,2,3,3,4,4,5,5,6,6,7,7,8,8,8-Pentadecafluoroocetyl)oxirane                                                                                                                                      | 20084-49-5  | FC(F)(F)C(F)(F)C(F)(F)C(F)(F)C(F)(F)C(F)(F)CC1CO1                                                                                                                                                                                               |
| QL02726 | 2-Propenoic acid, 3,3,4,4,5,5,6,6,7,7,8,8,9,9-pentadecafluoronoyl ester                                                                                                                             | 1799-55-9   | FC(F)(F)C(F)(F)C(F)(F)C(F)(F)C(F)(F)C(F)(F)CCOC(=O)C=C                                                                                                                                                                                          |
| QL02727 | n2 perfluoroalkyl acrylates, n=7                                                                                                                                                                    |             | FC(F)(F)C(F)(F)C(F)(F)C(F)(F)C(F)(F)C(F)(F)CCOC(CC(C)=C)=O                                                                                                                                                                                      |
| QL02728 | 1-Iodo-1H,1H-perfluorooctane                                                                                                                                                                        | 10258-49-8  | FC(F)(F)C(F)(F)C(F)(F)C(F)(F)C(F)(F)C(F)(F)I                                                                                                                                                                                                    |
| QL02729 | N-(2,2,3,3,4,4,5,5,6,6,7,7,8,8,8-Pentadecafluoroocetyl)prop-2-enamide                                                                                                                               | 424-01-1    | FC(F)(F)C(F)(F)C(F)(F)C(F)(F)C(F)(F)C(F)(F)CN(C=O)C=C                                                                                                                                                                                           |
| QL02730 | Bis(1H,1H-perfluoroocet-1-y)amine                                                                                                                                                                   | 3145-68-4   | FC(F)(F)C(F)(F)C(F)(F)C(F)(F)C(F)(F)C(NCC(F)(F)C(F)(F)C(F)(F)C(F)(F)F                                                                                                                                                                           |
| QL02731 | Bis(2,2,3,3,4,4,5,5,6,6,7,7,8,8,8-pentadecafluoroocetyl)<br>(2E)-but-2-enedioate                                                                                                                    | 24120-18-1  | FC(F)(F)C(F)(F)C(F)(F)C(F)(F)C(F)(F)COC(=O)=CC(=O)OCC(F)(F)C(F)(F)C(F)(F)C(F)(F)C(F)(F)F                                                                                                                                                        |
| QL02732 | Bis(2,2,3,3,4,4,5,5,6,6,7,7,8,8,8-pentadecafluoroocetyl)<br>3,4,5,6-tetrachlorobenzene-1,2-dicarboxylate<br>multiple H-substitued-ether-substtuded-perfluoroalkyl<br>(linear) carboxylic acids, n=7 | 2212-77-3   | FC(F)(F)C(F)(F)C(F)(F)C(F)(F)C(F)(F)COC(=O)c1c(Cl)c(Cl)c(Cl)c1Cl(=O)OCC(F)(F)C(F)(F)C(F)(F)C(F)(F)C(F)(F)F                                                                                                                                      |
| QL02733 | Allyl 1H,1H-perfluoroocetyl ether                                                                                                                                                                   | 812-72-6    | FC(F)(F)C(F)(F)C(F)(F)C(F)(F)C(F)(F)COCC(O)=O                                                                                                                                                                                                   |
| QL02734 |                                                                                                                                                                                                     |             | FC(F)(F)C(F)(F)C(F)(F)C(F)(F)C(F)(F)C(F)(F)COCC=C                                                                                                                                                                                               |
| QL02735 |                                                                                                                                                                                                     |             |                                                                                                                                                                                                                                                 |
| QL02736 | AC1MCPYN                                                                                                                                                                                            | 186043-52-7 | FC(F)(F)C(F)(F)C(F)(F)C(F)(F)COP1(OCC(F)(F)C(F)(F)C(F)(F)C(F)(F)C(F)(F)F)=NP(OCC(F)(F)C(F)(F)C(F)(F)C(F)(F)C(F)(F)C(F)(F)C(F)(F)C(F)(F)C(F)(F)C(F)(F)F)=NP(OCC(F)(F)C(F)(F)C(F)(F)C(F)(F)C(F)(F)C(F)(F)C(F)(F)C(F)(F)C(F)(F)C(F)(F)C(F)(F)F)=N1 |
| QL02737 | 2,2,3,3,4,4,5,5,6,6,7,7,8,8,8-Pentadecafluoroocetyl nonafluorobutane-1-sulfonate                                                                                                                    | 187039-77-6 | FC(F)(F)C(F)(F)C(F)(F)C(F)(F)C(F)(F)COS(=O)=O)C(F)(F)C(F)(F)C(F)(F)F                                                                                                                                                                            |
| QL02738 | 2,2,3,3,4,4,5,5,6,6,7,7,8,8,8-Pentadecafluoroocetyl trifluoromethanesulfonate                                                                                                                       | 17352-09-9  | FC(F)(F)C(F)(F)C(F)(F)C(F)(F)C(F)(F)COS(=O)=O)C(F)(F)F                                                                                                                                                                                          |



|         |                                                                                                            |             |                                                                                                                                                                                                                                                                                                                                                                                                                                                                                                                                                                                                                                                                                                                                                                                                                                                                                                                                                                                                                                                                                                                                                                                                                                                                                                                                                                                                                                                                                                                                                                                                                                                                                                                                                                                                                                                                                                                                                                                                                                                                                                                                                                                                                                                                                                                                                                                                                                                                                                                                                                                                                                                                                                                                                                                                                                                                                                                                                                                                                                                                                                                                                                                                                                                                                                                                                                                                                                                                                                                                                                                                                                                                                                                                                                                                                                                                                                                                                                                                                                                                                                                                                                                                                                                                                                                                                                                                                                                                                                                                                                                                                                                                                                                                                                                                                                                                                                                                                                                                                                                                                                                                                                                                                                                                                                                                                                                                                                                                                                                                                                                                                                                                                                                                                                                                                                                                                                                                                                                                                                                                                                                                                                                                                                                                                                                                                                                                                                                                                                                                                                                                                                                                                                                                                                                                                                                                                                                                                                                                                                                                                                                                                                                                                                                                                                                                                                                                                                                                                                                                                                                                                                                                                                                                                                                                                                                                                                                                                                                                                                                                                                                                                                                                                                                                                                                                                                                                                                                                                                                                                                                                                                                                                                                                                                                                                                                                                                                                                                                                                                                                                                                                                                                                                                                                                                                                                                                                                                                                                                                                                                                                                                                                                                                                                                                                                                                                                                                                                                                                                                                                                                                                                                                                                                                                                                                                                                                                                                                                                                                                                                                                                                                                                                                                                                                                                                                                                                                                                                                                                                                                                                                                                                                                                                                                                                                                                                                                                                                                                                                                                                                                                                                                                                                                                                                                                                                                                                                                                                                                                                                                                                                                                                                                                                                                                                                         |       |      |      |   |    |
|---------|------------------------------------------------------------------------------------------------------------|-------------|-------------------------------------------------------------------------------------------------------------------------------------------------------------------------------------------------------------------------------------------------------------------------------------------------------------------------------------------------------------------------------------------------------------------------------------------------------------------------------------------------------------------------------------------------------------------------------------------------------------------------------------------------------------------------------------------------------------------------------------------------------------------------------------------------------------------------------------------------------------------------------------------------------------------------------------------------------------------------------------------------------------------------------------------------------------------------------------------------------------------------------------------------------------------------------------------------------------------------------------------------------------------------------------------------------------------------------------------------------------------------------------------------------------------------------------------------------------------------------------------------------------------------------------------------------------------------------------------------------------------------------------------------------------------------------------------------------------------------------------------------------------------------------------------------------------------------------------------------------------------------------------------------------------------------------------------------------------------------------------------------------------------------------------------------------------------------------------------------------------------------------------------------------------------------------------------------------------------------------------------------------------------------------------------------------------------------------------------------------------------------------------------------------------------------------------------------------------------------------------------------------------------------------------------------------------------------------------------------------------------------------------------------------------------------------------------------------------------------------------------------------------------------------------------------------------------------------------------------------------------------------------------------------------------------------------------------------------------------------------------------------------------------------------------------------------------------------------------------------------------------------------------------------------------------------------------------------------------------------------------------------------------------------------------------------------------------------------------------------------------------------------------------------------------------------------------------------------------------------------------------------------------------------------------------------------------------------------------------------------------------------------------------------------------------------------------------------------------------------------------------------------------------------------------------------------------------------------------------------------------------------------------------------------------------------------------------------------------------------------------------------------------------------------------------------------------------------------------------------------------------------------------------------------------------------------------------------------------------------------------------------------------------------------------------------------------------------------------------------------------------------------------------------------------------------------------------------------------------------------------------------------------------------------------------------------------------------------------------------------------------------------------------------------------------------------------------------------------------------------------------------------------------------------------------------------------------------------------------------------------------------------------------------------------------------------------------------------------------------------------------------------------------------------------------------------------------------------------------------------------------------------------------------------------------------------------------------------------------------------------------------------------------------------------------------------------------------------------------------------------------------------------------------------------------------------------------------------------------------------------------------------------------------------------------------------------------------------------------------------------------------------------------------------------------------------------------------------------------------------------------------------------------------------------------------------------------------------------------------------------------------------------------------------------------------------------------------------------------------------------------------------------------------------------------------------------------------------------------------------------------------------------------------------------------------------------------------------------------------------------------------------------------------------------------------------------------------------------------------------------------------------------------------------------------------------------------------------------------------------------------------------------------------------------------------------------------------------------------------------------------------------------------------------------------------------------------------------------------------------------------------------------------------------------------------------------------------------------------------------------------------------------------------------------------------------------------------------------------------------------------------------------------------------------------------------------------------------------------------------------------------------------------------------------------------------------------------------------------------------------------------------------------------------------------------------------------------------------------------------------------------------------------------------------------------------------------------------------------------------------------------------------------------------------------------------------------------------------------------------------------------------------------------------------------------------------------------------------------------------------------------------------------------------------------------------------------------------------------------------------------------------------------------------------------------------------------------------------------------------------------------------------------------------------------------------------------------------------------------------------------------------------------------------------------------------------------------------------------------------------------------------------------------------------------------------------------------------------------------------------------------------------------------------------------------------------------------------------------------------------------------------------------------------------------------------------------------------------------------------------------------------------------------------------------------------------------------------------------------------------------------------------------------------------------------------------------------------------------------------------------------------------------------------------------------------------------------------------------------------------------------------------------------------------------------------------------------------------------------------------------------------------------------------------------------------------------------------------------------------------------------------------------------------------------------------------------------------------------------------------------------------------------------------------------------------------------------------------------------------------------------------------------------------------------------------------------------------------------------------------------------------------------------------------------------------------------------------------------------------------------------------------------------------------------------------------------------------------------------------------------------------------------------------------------------------------------------------------------------------------------------------------------------------------------------------------------------------------------------------------------------------------------------------------------------------------------------------------------------------------------------------------------------------------------------------------------------------------------------------------------------------------------------------------------------------------------------------------------------------------------------------------------------------------------------------------------------------------------------------------------------------------------------------------------------------------------------------------------------------------------------------------------------------------------------------------------------------------------------------------------------------------------------------------------------------------------------------------------------------------------------------------------------------------------------------------------------------------------------------------------------------------------------------------------------------------------------------------------------------------------------------------------------------------------------------------------------------------------------------------------------------------------------------------------------------------------------------------------------------------------------------------------------------------------------------------------------------------------------------------------------------------------------------------------------------------------------------------------------------------------------------------------------------------------------------------------------------------------------------------------------------------------------------------------------------------------------------------------------------------------------------------------------------------------------------------------------------------------------------------------------------------------------------------------------------------------------------------------------------------------------------------------------------------------------------------------|-------|------|------|---|----|
| QL02777 | 1-(3,3,4,4,5,5,6,6,7,7,8,8-Tridecafluoro-1-iodooctyl)-<br>2,8,9-trioxo-5-aza-1-silabicyclo[3.3.3]undecane  | 135587-15-4 | FC(F)(F)C(F)(F)C(F)(F)C(F)(F)C(F)(F)C(F)(F)CC(I)[Si]12OCCN(CCO3)CCO2                                                                                                                                                                                                                                                                                                                                                                                                                                                                                                                                                                                                                                                                                                                                                                                                                                                                                                                                                                                                                                                                                                                                                                                                                                                                                                                                                                                                                                                                                                                                                                                                                                                                                                                                                                                                                                                                                                                                                                                                                                                                                                                                                                                                                                                                                                                                                                                                                                                                                                                                                                                                                                                                                                                                                                                                                                                                                                                                                                                                                                                                                                                                                                                                                                                                                                                                                                                                                                                                                                                                                                                                                                                                                                                                                                                                                                                                                                                                                                                                                                                                                                                                                                                                                                                                                                                                                                                                                                                                                                                                                                                                                                                                                                                                                                                                                                                                                                                                                                                                                                                                                                                                                                                                                                                                                                                                                                                                                                                                                                                                                                                                                                                                                                                                                                                                                                                                                                                                                                                                                                                                                                                                                                                                                                                                                                                                                                                                                                                                                                                                                                                                                                                                                                                                                                                                                                                                                                                                                                                                                                                                                                                                                                                                                                                                                                                                                                                                                                                                                                                                                                                                                                                                                                                                                                                                                                                                                                                                                                                                                                                                                                                                                                                                                                                                                                                                                                                                                                                                                                                                                                                                                                                                                                                                                                                                                                                                                                                                                                                                                                                                                                                                                                                                                                                                                                                                                                                                                                                                                                                                                                                                                                                                                                                                                                                                                                                                                                                                                                                                                                                                                                                                                                                                                                                                                                                                                                                                                                                                                                                                                                                                                                                                                                                                                                                                                                                                                                                                                                                                                                                                                                                                                                                                                                                                                                                                                                                                                                                                                                                                                                                                                                                                                                                                                                                                                                                                                                                                                                                                                                                                                                                                                                                                                                                    | -7.74 | 0.65 | 2.74 | P | IN |
| QL02778 | 1,1,1,2,2,3,3,4,4,5,5,6,6,7,7,8,8,11,11,12,12,13,13,14,14,1<br>5,15,16,16-Triacontafluoro-9-iodohexadecane | 53713-87-4  | FC(F)(F)C(F)(F)C(F)(F)C(F)(F)C(F)(F)C(F)(F)C(F)(F)C(F)(F)C(F)(F)C(F)(F)C(F)(F)C(F)(F)C(F)(F)C(F)(F)C(F)(F)C(F)(F)C(F)(F)C(F)(F)C(F)(F)C(F)(F)C(F)(F)C(F)(F)C(F)(F)C(F)(F)C(F)(F)C(F)(F)C(F)(F)C(F)(F)C(F)(F)C(F)(F)C(F)(F)C(F)(F)C(F)(F)C(F)(F)C(F)(F)C(F)(F)C(F)(F)C(F)(F)C(F)(F)C(F)(F)C(F)(F)C(F)(F)C(F)(F)C(F)(F)C(F)(F)C(F)(F)C(F)(F)C(F)(F)C(F)(F)C(F)(F)C(F)(F)C(F)(F)C(F)(F)C(F)(F)C(F)(F)C(F)(F)C(F)(F)C(F)(F)C(F)(F)C(F)(F)C(F)(F)C(F)(F)C(F)(F)C(F)(F)C(F)(F)C(F)(F)C(F)(F)C(F)(F)C(F)(F)C(F)(F)C(F)(F)C(F)(F)C(F)(F)C(F)(F)C(F)(F)C(F)(F)C(F)(F)C(F)(F)C(F)(F)C(F)(F)C(F)(F)C(F)(F)C(F)(F)C(F)(F)C(F)(F)C(F)(F)C(F)(F)C(F)(F)C(F)(F)C(F)(F)C(F)(F)C(F)(F)C(F)(F)C(F)(F)C(F)(F)C(F)(F)C(F)(F)C(F)(F)C(F)(F)C(F)(F)C(F)(F)C(F)(F)C(F)(F)C(F)(F)C(F)(F)C(F)(F)C(F)(F)C(F)(F)C(F)(F)C(F)(F)C(F)(F)C(F)(F)C(F)(F)C(F)(F)C(F)(F)C(F)(F)C(F)(F)C(F)(F)C(F)(F)C(F)(F)C(F)(F)C(F)(F)C(F)(F)C(F)(F)C(F)(F)C(F)(F)C(F)(F)C(F)(F)C(F)(F)C(F)(F)C(F)(F)C(F)(F)C(F)(F)C(F)(F)C(F)(F)C(F)(F)C(F)(F)C(F)(F)C(F)(F)C(F)(F)C(F)(F)C(F)(F)C(F)(F)C(F)(F)C(F)(F)C(F)(F)C(F)(F)C(F)(F)C(F)(F)C(F)(F)C(F)(F)C(F)(F)C(F)(F)C(F)(F)C(F)(F)C(F)(F)C(F)(F)C(F)(F)C(F)(F)C(F)(F)C(F)(F)C(F)(F)C(F)(F)C(F)(F)C(F)(F)C(F)(F)C(F)(F)C(F)(F)C(F)(F)C(F)(F)C(F)(F)C(F)(F)C(F)(F)C(F)(F)C(F)(F)C(F)(F)C(F)(F)C(F)(F)C(F)(F)C(F)(F)C(F)(F)C(F)(F)C(F)(F)C(F)(F)C(F)(F)C(F)(F)C(F)(F)C(F)(F)C(F)(F)C(F)(F)C(F)(F)C(F)(F)C(F)(F)C(F)(F)C(F)(F)C(F)(F)C(F)(F)C(F)(F)C(F)(F)C(F)(F)C(F)(F)C(F)(F)C(F)(F)C(F)(F)C(F)(F)C(F)(F)C(F)(F)C(F)(F)C(F)(F)C(F)(F)C(F)(F)C(F)(F)C(F)(F)C(F)(F)C(F)(F)C(F)(F)C(F)(F)C(F)(F)C(F)(F)C(F)(F)C(F)(F)C(F)(F)C(F)(F)C(F)(F)C(F)(F)C(F)(F)C(F)(F)C(F)(F)C(F)(F)C(F)(F)C(F)(F)C(F)(F)C(F)(F)C(F)(F)C(F)(F)C(F)(F)C(F)(F)C(F)(F)C(F)(F)C(F)(F)C(F)(F)C(F)(F)C(F)(F)C(F)(F)C(F)(F)C(F)(F)C(F)(F)C(F)(F)C(F)(F)C(F)(F)C(F)(F)C(F)(F)C(F)(F)C(F)(F)C(F)(F)C(F)(F)C(F)(F)C(F)(F)C(F)(F)C(F)(F)C(F)(F)C(F)(F)C(F)(F)C(F)(F)C(F)(F)C(F)(F)C(F)(F)C(F)(F)C(F)(F)C(F)(F)C(F)(F)C(F)(F)C(F)(F)C(F)(F)C(F)(F)C(F)(F)C(F)(F)C(F)(F)C(F)(F)C(F)(F)C(F)(F)C(F)(F)C(F)(F)C(F)(F)C(F)(F)C(F)(F)C(F)(F)C(F)(F)C(F)(F)C(F)(F)C(F)(F)C(F)(F)C(F)(F)C(F)(F)C(F)(F)C(F)(F)C(F)(F)C(F)(F)C(F)(F)C(F)(F)C(F)(F)C(F)(F)C(F)(F)C(F)(F)C(F)(F)C(F)(F)C(F)(F)C(F)(F)C(F)(F)C(F)(F)C(F)(F)C(F)(F)C(F)(F)C(F)(F)C(F)(F)C(F)(F)C(F)(F)C(F)(F)C(F)(F)C(F)(F)C(F)(F)C(F)(F)C(F)(F)C(F)(F)C(F)(F)C(F)(F)C(F)(F)C(F)(F)C(F)(F)C(F)(F)C(F)(F)C(F)(F)C(F)(F)C(F)(F)C(F)(F)C(F)(F)C(F)(F)C(F)(F)C(F)(F)C(F)(F)C(F)(F)C(F)(F)C(F)(F)C(F)(F)C(F)(F)C(F)(F)C(F)(F)C(F)(F)C(F)(F)C(F)(F)C(F)(F)C(F)(F)C(F)(F)C(F)(F)C(F)(F)C(F)(F)C(F)(F)C(F)(F)C(F)(F)C(F)(F)C(F)(F)C(F)(F)C(F)(F)C(F)(F)C(F)(F)C(F)(F)C(F)(F)C(F)(F)C(F)(F)C(F)(F)C(F)(F)C(F)(F)C(F)(F)C(F)(F)C(F)(F)C(F)(F)C(F)(F)C(F)(F)C(F)(F)C(F)(F)C(F)(F)C(F)(F)C(F)(F)C(F)(F)C(F)(F)C(F)(F)C(F)(F)C(F)(F)C(F)(F)C(F)(F)C(F)(F)C(F)(F)C(F)(F)C(F)(F)C(F)(F)C(F)(F)C(F)(F)C(F)(F)C(F)(F)C(F)(F)C(F)(F)C(F)(F)C(F)(F)C(F)(F)C(F)(F)C(F)(F)C(F)(F)C(F)(F)C(F)(F)C(F)(F)C(F)(F)C(F)(F)C(F)(F)C(F)(F)C(F)(F)C(F)(F)C(F)(F)C(F)(F)C(F)(F)C(F)(F)C(F)(F)C(F)(F)C(F)(F)C(F)(F)C(F)(F)C(F)(F)C(F)(F)C(F)(F)C(F)(F)C(F)(F)C(F)(F)C(F)(F)C(F)(F)C(F)(F)C(F)(F)C(F)(F)C(F)(F)C(F)(F)C(F)(F)C(F)(F)C(F)(F)C(F)(F)C(F)(F)C(F)(F)C(F)(F)C(F)(F)C(F)(F)C(F)(F)C(F)(F)C(F)(F)C(F)(F)C(F)(F)C(F)(F)C(F)(F)C(F)(F)C(F)(F)C(F)(F)C(F)(F)C(F)(F)C(F)(F)C(F)(F)C(F)(F)C(F)(F)C(F)(F)C(F)(F)C(F)(F)C(F)(F)C(F)(F)C(F)(F)C(F)(F)C(F)(F)C(F)(F)C(F)(F)C(F)(F)C(F)(F)C(F)(F)C(F)(F)C(F)(F)C(F)(F)C(F)(F)C(F)(F)C(F)(F)C(F)(F)C(F)(F)C(F)(F)C(F)(F)C(F)(F)C(F)(F)C(F)(F)C(F)(F)C(F)(F)C(F)(F)C(F)(F)C(F)(F)C(F)(F)C(F)(F)C(F)(F)C(F)(F)C(F)(F)C(F)(F)C(F)(F)C(F)(F)C(F)(F)C(F)(F)C(F)(F)C(F)(F)C(F)(F)C(F)(F)C(F)(F)C(F)(F)C(F)(F)C(F)(F)C(F)(F)C(F)(F)C(F)(F)C(F)(F)C(F)(F)C(F)(F)C(F)(F)C(F)(F)C(F)(F)C(F)(F)C(F)(F)C(F)(F)C(F)(F)C(F)(F)C(F)(F)C(F)(F)C(F)(F)C(F)(F)C(F)(F)C(F)(F)C(F)(F)C(F)(F)C(F)(F)C(F)(F)C(F)(F)C(F)(F)C(F)(F)C(F)(F)C(F)(F)C(F)(F)C(F)(F)C(F)(F)C(F)(F)C(F)(F)C(F)(F)C(F)(F)C(F)(F)C(F)(F)C(F)(F)C(F)(F)C(F)(F)C(F)(F)C(F)(F)C(F)(F)C(F)(F)C(F)(F)C(F)(F)C(F)(F)C(F)(F)C(F)(F)C(F)(F)C(F)(F)C(F)(F)C(F)(F)C(F)(F)C(F)(F)C(F)(F)C(F)(F)C(F)(F)C(F)(F)C(F)(F)C(F)(F)C(F)(F)C(F)(F)C(F)(F)C(F)(F)C(F)(F)C(F)(F)C(F)(F)C(F)(F)C(F)(F)C(F)(F)C(F)(F)C(F)(F)C(F)(F)C(F)(F)C(F)(F)C(F)(F)C(F)(F)C(F)(F)C(F)(F)C(F)(F)C(F)(F)C(F)(F)C(F)(F)C(F)(F)C(F)(F)C(F)(F)C(F)(F)C(F)(F)C(F)(F)C(F)(F)C(F)(F)C(F)(F)C(F)(F)C(F)(F)C(F)(F)C(F)(F)C(F)(F)C(F)(F)C(F)(F)C(F)(F)C(F)(F)C(F)(F)C(F)(F)C(F)(F)C(F)(F)C(F)(F)C(F)(F)C(F)(F)C(F)(F)C(F)(F)C(F)(F)C(F)(F)C(F)(F)C(F)(F)C(F)(F)C(F)(F)C(F)(F)C(F)(F)C(F)(F)C(F)(F)C(F)(F)C(F)(F)C(F)(F)C(F)(F)C(F)(F)C(F)(F)C(F)(F)C(F)(F)C(F)(F)C(F)(F)C(F)(F)C(F)(F)C(F)(F)C(F)(F)C(F)(F)C(F)(F)C(F)(F)C(F)(F)C(F)(F)C(F)(F)C(F)(F)C(F)(F)C(F)(F)C(F)(F)C(F)(F)C(F)(F)C(F)(F)C(F)(F)C(F)(F)C(F)(F)C(F)(F)C(F)(F)C(F)(F)C(F)(F)C(F)(F)C(F)(F)C(F)(F)C(F)(F)C(F)(F)C(F)(F)C(F)(F)C(F)(F)C(F)(F)C(F)(F)C(F)(F)C(F)(F)C(F)(F)C(F)(F)C(F)(F)C(F)(F)C(F)(F)C(F)(F)C(F)(F)C(F)(F)C(F)(F)C(F)(F)C(F)(F)C(F)(F)C(F)(F)C(F)(F)C(F)(F)C(F)(F)C(F)(F)C(F)(F)C(F)(F)C(F)(F)C(F)(F)C(F)(F)C(F)(F)C(F)(F)C(F)(F)C(F)(F)C(F)(F)C(F)(F)C(F)(F)C(F)(F)C(F)(F)C(F)(F)C(F)(F)C(F)(F)C(F)(F)C(F)(F)C(F)(F)C(F)(F)C(F)(F)C(F)(F)C(F)(F)C(F)(F)C(F)(F)C(F)(F)C(F)(F)C(F)(F)C(F)(F)C(F)(F)C(F)(F)C(F)(F)C(F)(F)C(F)(F)C(F)(F)C(F)(F)C(F)(F)C(F)(F)C(F)(F)C(F)(F)C(F)(F)C(F)(F)C(F)(F)C(F)(F)C(F)(F)C(F)(F)C(F)(F)C(F)(F)C(F)(F)C(F)(F)C(F)(F)C(F)(F)C(F)(F)C(F)(F)C(F)(F)C(F)(F)C(F)(F)C(F)(F)C(F)(F)C(F)(F)C(F)(F)C(F)(F)C(F)(F)C(F)(F)C(F)(F)C(F)(F)C(F)(F)C(F)(F)C(F)(F)C(F)(F)C(F)(F)C(F)(F)C(F)(F)C(F)(F)C(F)(F)C(F)(F)C(F)(F)C(F)(F)C(F)(F)C(F)(F)C(F)(F)C(F)(F)C(F)(F)C(F)(F)C(F)(F)C(F)(F)C(F)(F)C(F)(F)C(F)(F)C(F)(F)C(F)(F)C(F)(F)C(F)(F)C(F)(F)C(F)(F)C(F)(F)C(F)(F)C(F)(F)C(F)(F)C(F)(F)C(F)(F)C(F)(F)C(F)(F)C(F)(F)C(F)(F)C(F)(F)C(F)(F)C(F)(F)C(F)(F)C(F)(F)C(F)(F)C(F)(F)C(F)(F)C(F)(F)C(F)(F)C(F)(F)C(F)(F)C(F)(F)C(F)(F)C(F)(F)C(F)(F)C(F)(F)C(F)(F)C(F)(F)C(F)(F)C(F)(F)C(F)(F)C(F)(F)C(F)(F)C(F)(F)C(F)(F)C(F)(F)C(F)(F)C(F)(F)C(F)(F)C(F)(F)C(F)(F)C(F)(F)C(F)(F)C(F)(F)C(F)(F)C(F)(F)C(F)(F)C(F)(F)C(F)(F)C(F)(F)C(F)(F)C(F)(F)C(F)(F)C(F)(F)C(F)(F)C(F)(F)C(F)(F)C(F)(F)C(F)(F)C(F)(F)C(F)(F)C(F)(F)C(F)(F)C(F)(F)C(F)(F)C(F)(F)C(F)(F)C(F)(F)C(F)(F)C(F)(F)C(F)(F)C(F)(F)C(F)(F)C(F)(F)C(F)(F)C(F)(F)C(F)(F)C(F)(F)C(F)(F)C(F)(F)C(F)(F)C(F)(F)C(F)(F)C(F)(F)C(F)(F)C(F)(F)C(F)(F)C(F)(F)C(F)(F)C(F)(F)C(F)(F)C(F)(F)C(F)(F)C(F)(F)C(F)(F)C(F)(F)C(F)(F)C(F)(F)C(F)(F)C(F)(F)C(F)(F)C(F)(F)C(F)(F)C(F)(F)C(F)(F)C(F)(F)C(F)(F)C(F)(F)C(F)(F)C(F)(F)C(F)(F)C(F)(F)C(F)(F)C(F)(F)C(F)(F)C(F)(F)C(F)(F)C(F)(F)C(F)(F)C(F)(F)C(F)(F)C(F)(F)C(F)(F)C(F)(F)C(F)(F)C(F)(F)C(F)(F)C(F)(F)C(F)(F)C(F)(F)C(F)(F)C(F)(F)C(F)(F)C(F)(F)C(F)(F)C(F)(F)C(F)(F)C(F)(F)C(F)(F)C(F)(F)C(F)(F)C(F)(F)C(F)(F)C(F)(F)C(F)(F)C(F)(F)C(F)(F)C(F)(F)C(F)(F)C(F)(F)C(F)(F)C(F)(F)C(F)(F)C(F)(F)C(F)(F)C(F)(F)C(F)(F)C(F)(F)C(F)(F)C(F)(F)C(F)(F)C(F)(F)C(F)(F)C(F)(F)C(F)(F)C(F)(F)C(F)(F)C(F)(F)C(F)(F)C(F)(F)C(F)(F)C(F)(F)C(F)(F)C(F)(F)C(F)(F)C(F)(F)C(F)(F)C(F)(F)C(F)(F)C(F)(F)C(F)(F)C(F)(F)C(F)(F)C(F)(F)C(F)(F)C(F)(F)C(F)(F)C(F)(F)C(F)(F)C(F)(F)C(F)(F)C(F)(F)C(F)(F)C(F)(F)C(F)(F)C(F)(F)C(F)(F)C(F)(F)C(F)(F)C(F)(F)C(F)(F)C(F)(F)C(F)(F)C(F)(F)C(F)(F)C(F)(F)C(F)(F)C(F)(F)C(F)(F)C(F)(F)C(F)(F)C(F)(F)C(F)(F)C(F)(F)C(F)(F)C(F)(F)C(F)(F)C(F)(F)C(F)(F)C(F)(F)C(F)(F)C(F)(F)C(F)(F)C(F)(F)C(F)(F)C(F)(F)C(F)(F)C(F)(F)C(F)(F)C(F)(F)C(F)(F)C(F)(F)C(F)(F)C(F)(F)C(F)(F)C(F)(F)C(F)(F)C(F)(F)C(F)(F)C(F)(F)C(F)(F)C(F)(F)C(F)(F)C(F)(F)C(F)(F)C(F)(F)C(F)(F)C(F)(F)C(F)(F)C(F)(F)C(F)(F)C(F)(F)C(F)(F)C(F)(F)C(F)(F)C(F)(F)C(F)(F)C(F)(F)C(F)(F)C(F)(F)C(F)(F)C(F)(F)C(F)(F)C(F)(F)C(F)(F)C(F)(F)C(F)(F)C(F)(F)C(F)(F)C(F)(F)C(F)(F)C(F)(F)C(F)(F)C(F)(F)C(F)(F)C(F)(F)C(F)(F)C(F)(F)C(F)(F)C(F)(F)C(F)(F)C(F)(F)C(F)(F)C(F)(F)C(F)(F)C(F)(F)C(F)(F)C(F)(F)C(F)(F)C(F)(F)C(F)(F)C(F)(F)C(F)(F)C(F)(F)C(F)(F)C(F)(F)C(F)(F)C(F)(F)C(F)(F)C(F)(F)C(F)(F)C(F)(F)C(F)(F)C(F)(F)C(F)(F)C(F)(F)C(F)(F)C(F)(F)C(F)(F)C(F)(F)C(F)(F)C(F)(F)C(F)(F)C(F)(F)C(F)(F)C(F)(F)C(F)(F)C(F)(F)C(F)(F)C(F)(F)C(F)(F)C(F)(F)C(F)(F)C(F)(F)C(F)(F)C(F)(F)C(F)(F)C(F)(F)C(F)(F)C(F)(F)C(F)(F)C(F)(F)C(F)(F)C(F)(F)C(F)(F)C(F)(F)C(F)(F)C(F)(F)C(F)(F)C(F)(F)C(F)(F)C(F)(F)C(F)(F)C(F)(F)C(F)(F)C(F)(F)C(F)(F)C(F)(F)C(F)(F)C(F)(F)C(F)(F)C(F)(F)C(F)(F)C(F)(F)C(F)(F)C(F)(F)C(F)(F)C(F)(F)C(F)(F)C(F)(F)C(F)(F)C(F)(F)C(F)(F)C(F)(F)C(F)(F)C(F)(F)C(F)(F)C(F)(F)C(F)(F)C(F)(F)C(F)(F)C(F)(F)C(F)(F)C(F)(F)C(F)(F)C(F)(F)C(F)(F)C(F)(F)C(F)(F)C(F)(F)C(F)(F)C(F)(F)C(F)(F)C(F)(F)C(F)(F)C(F)(F)C(F)(F)C(F)(F)C(F)(F)C(F)(F)C(F)(F)C(F)(F)C(F)(F)C(F)(F)C(F)(F)C(F)(F)C(F)(F)C(F)(F)C(F)(F)C(F)(F)C(F)(F)C(F)(F)C(F)(F)C(F)(F)C(F)(F)C(F)(F)C(F)(F)C(F)(F)C(F)(F)C(F)(F)C(F)(F)C(F)(F)C(F)(F)C(F)(F)C(F)(F)C(F)(F)C(F)(F)C(F)(F)C(F)(F)C(F)(F)C(F)(F)C(F)(F)C(F)(F)C(F)(F)C(F)(F)C(F)(F)C(F)(F)C(F)(F)C(F)(F)C(F)(F)C(F)(F)C(F)(F)C(F)(F)C(F)(F)C(F)(F)C(F)(F)C(F)(F)C(F)(F)C(F)(F)C(F)(F)C(F)(F)C(F)(F)C(F)(F)C(F)(F)C(F)(F)C(F)(F)C(F)(F)C(F)(F)C(F)(F)C(F)(F)C(F)(F)C(F)(F)C(F)(F)C(F)(F)C(F)(F)C(F)(F)C(F)(F)C(F)(F)C(F)(F)C(F)(F)C(F)(F)C(F)(F)C(F)(F)C(F)(F)C(F)(F)C(F)(F)C(F)(F)C(F)(F)C(F)(F)C(F)(F)C(F)(F)C(F)(F)C(F)(F)C(F)(F)C(F)(F)C(F)(F)C(F)(F)C(F)(F)C(F)(F)C(F)(F)C(F)(F)C(F)(F)C(F)(F)C(F)(F)C(F)(F)C(F)(F)C(F)(F)C(F)(F)C(F)(F)C(F)(F)C(F)(F)C(F)(F)C(F)(F)C(F)(F)C(F)(F)C(F)(F)C(F)(F)C(F)(F)C(F)(F)C(F)(F)C(F)(F)C(F)(F)C(F)(F)C(F)(F)C(F)(F)C(F)(F)C(F)(F)C(F)(F)C(F)(F)C(F)(F)C(F)(F)C(F)(F)C(F)(F)C(F)(F)C(F)(F)C(F)(F)C(F)(F)C(F)(F)C(F)(F)C(F)(F)C(F)(F)C(F)(F)C(F)(F)C(F)(F)C(F)(F)C(F)(F)C(F)(F)C(F)(F)C(F)(F)C(F)(F)C(F)(F)C(F)(F)C(F)(F)C(F)(F)C(F)(F)C(F)(F)C(F)(F)C(F)(F)C(F)(F)C(F)(F)C(F)(F)C(F)(F)C(F)(F)C(F)(F)C(F)(F)C(F)(F)C(F)(F)C(F)(F)C(F)(F)C(F)(F)C(F)(F)C(F)(F)C(F)(F)C(F)(F)C(F)(F)C(F)(F)C(F)(F)C(F)(F)C(F)(F)C(F)(F)C(F)(F)C(F)(F)C(F)(F)C(F)(F)C(F)(F)C(F)(F)C(F)(F)C(F)(F)C(F)(F)C(F)(F)C(F)(F)C(F)(F)C(F)(F)C(F)(F)C(F)(F)C(F)(F)C(F)(F)C(F)(F)C(F)(F)C(F)(F)C(F)(F)C(F)(F)C(F)(F)C(F)(F)C(F)(F)C(F)(F)C(F)(F)C(F)(F)C(F)(F)C(F)(F)C(F)(F)C(F)(F)C(F)(F)C(F)(F)C(F)(F)C(F)(F)C(F)(F)C(F)(F)C(F)(F)C(F)(F)C(F)(F)C(F)(F)C(F)(F)C(F)(F)C(F)(F)C(F)(F)C(F)(F)C(F)(F)C(F)(F)C(F)(F)C(F)(F)C(F)(F)C(F)(F)C(F)(F)C(F)(F)C(F)(F)C(F)(F)C(F)(F)C(F)(F)C(F)(F)C(F)(F)C(F)(F)C(F)(F)C(F)(F)C(F)(F)C(F)(F)C(F)(F)C(F)(F)C(F)(F)C(F)(F)C(F)(F)C(F)(F)C(F)(F)C(F)(F)C(F)(F)C(F)(F)C(F)(F)C(F)(F)C(F)(F)C(F)(F)C(F)(F)C(F)(F)C(F)(F)C(F)(F)C(F)(F)C(F)(F)C(F)(F)C(F)(F)C(F)(F)C(F)(F)C(F)(F)C(F)(F)C(F)(F)C(F)(F)C(F)(F)C(F)(F)C(F)(F)C(F)(F)C(F)(F)C(F)(F)C(F)(F)C(F)(F)C(F)(F)C(F)(F)C(F)(F)C(F)(F)C(F)(F)C(F)(F)C(F)(F)C(F)(F)C(F)(F)C(F)(F)C(F)(F)C(F)(F)C(F)(F)C(F)(F)C(F)(F)C(F)(F)C(F)(F)C(F)(F)C(F)(F)C(F)(F)C(F)(F)C(F)(F)C(F)(F)C(F)(F)C(F)(F)C(F)(F)C(F)(F)C(F)(F)C(F)(F)C(F)(F)C(F)(F)C(F)(F)C(F)(F)C(F)(F)C(F)(F)C(F)(F)C(F)(F)C(F)(F)C(F)(F)C(F)(F)C(F)(F)C(F)(F)C(F)(F)C(F)(F)C(F)(F)C(F)(F)C(F)(F)C(F)(F)C(F)(F)C(F)(F)C(F)(F)C(F)(F)C(F)(F)C(F)(F)C(F)(F)C(F)(F)C(F)(F)C(F)(F)C(F)(F)C(F)(F)C(F)(F)C(F)(F)C(F)(F)C(F)(F)C(F)(F)C(F)(F)C(F)(F)C(F)(F)C(F)(F)C(F)(F)C(F)(F)C(F)(F)C(F)(F)C(F)(F)C(F)(F)C(F)(F)C(F)(F)C(F)(F)C(F)(F)C(F)(F)C(F)(F)C(F)(F)C(F)(F)C(F)(F)C(F)(F)C(F)(F)C(F)(F)C(F)(F)C(F)(F)C(F)(F)C(F)(F)C(F)(F)C(F)(F)C(F)(F)C(F)(F)C(F)(F)C(F)(F)C(F)(F)C(F)(F)C(F)(F)C(F)(F)C(F)(F)C(F)(F)C(F)(F)C(F)(F)C(F)(F)C(F)(F)C(F)(F)C(F)(F)C(F)(F)C(F)(F)C(F)(F)C(F)(F)C(F)(F)C(F)(F)C(F)(F)C(F)(F)C(F)(F)C(F)(F)C(F)(F)C(F)(F)C(F)(F)C(F)(F)C(F)(F)C(F)(F)C(F)(F)C(F)(F)C(F)(F)C(F)(F)C(F)(F)C(F)(F)C(F)(F)C(F)(F)C(F)(F)C(F)(F)C(F)(F)C(F)(F)C(F)(F)C(F)(F)C(F)(F)C(F)(F)C(F)(F)C(F)(F)C(F)(F)C(F)(F)C(F)(F)C(F)(F)C(F)(F)C(F)(F)C(F)(F)C(F)(F)C(F)(F)C(F)(F)C(F)(F)C(F)(F)C(F)(F)C(F)(F)C(F)(F)C(F)(F)C(F)(F)C(F)(F)C(F)(F)C(F)(F)C(F)(F)C(F)(F)C(F)(F)C(F)(F)C(F)(F)C(F)(F)C(F)(F)C(F)(F)C(F)(F)C(F)(F)C(F)(F)C(F)(F)C(F)(F)C(F)(F)C(F)(F)C(F)(F)C(F)(F)C(F)(F)C(F)(F)C(F)(F)C(F)(F)C(F)(F)C(F)(F)C(F)(F)C(F)(F)C(F)(F)C(F)(F)C(F)(F)C(F)(F)C(F)(F)C(F)(F)C(F)(F)C(F)(F)C(F)(F)C(F)(F)C(F)(F)C(F)(F)C(F)(F)C(F)(F)C(F)(F)C(F)(F)C(F)(F)C(F)(F)C(F)(F)C(F)(F)C(F)(F)C(F)(F)C(F)(F)C(F)(F)C(F)(F)C(F)(F)C(F)(F)C(F)(F)C(F)(F)C(F)(F)C(F)(F)C(F)(F)C(F)(F)C(F)(F)C(F)(F)C(F)(F)C(F)(F)C(F)(F)C(F)(F)C(F)(F)C(F)(F)C(F)(F)C(F)(F)C(F)(F)C(F)(F)C(F)(F) |       |      |      |   |    |

[illegible]

[illegible]



[illegible]

|         |                                                                                               |              |                                                                                                     |       |      |      |   |     |
|---------|-----------------------------------------------------------------------------------------------|--------------|-----------------------------------------------------------------------------------------------------|-------|------|------|---|-----|
| QL02909 | 1,1,2,2,3,3,4,4,5,5,5-undecafluoro-N-(2-hydroxyethyl)pentane-1-sulfonamide                    |              | FC(F)(F)C(F)(F)C(F)(F)C(F)(F)S(=O)(NCCO)=O                                                          | -7.41 | 0.66 | 2.46 | P | IN  |
| QL02910 | Perfluoroalkyl (linear) sulfinate, n=5                                                        |              | FC(F)(F)C(F)(F)C(F)(F)C(F)(F)S(O)=O                                                                 | -6.91 | 0.68 | 1.90 | P | IN  |
| QL02911 | 1,1,1,2,2,3,3,4,4,5,6,6,6-Tridecafluoro-5-iodohexane                                          | 355-44-2     | FC(F)(F)C(F)(F)C(F)(F)C(F)(F)C(F)(I)C(F)(F)F                                                        | -7.19 | 0.69 | 1.90 | P | IN  |
| QL02912 | 2,2,3,3,4,4,5,5,5-Nonafluoropentane-1,1-diol                                                  | 355-30-6     | FC(F)(F)C(F)(F)C(F)(F)C(F)(F)C(O)O                                                                  | -6.61 | 0.67 | 1.81 | P | IN  |
| QL02913 | (3,3,4,4,5,5,6,6,6-Nonafluorohex-1-yn-1-yl)benzene                                            | 66249-23-8   | FC(F)(F)C(F)(F)C(F)(F)C(F)(F)C#Cc1ccccc1                                                            | -6.80 | 0.64 | 2.43 | P | OUT |
| QL02914 | 2,2,3,3,4,4,5,5,5-nonafluoropentanenitrile                                                    | 22325-71-9   | FC(F)(F)C(F)(F)C(F)(F)C(F)(F)C#N                                                                    | -6.40 | 0.67 | 1.81 | P | IN  |
| QL02915 | 1H,1H,2H-Perfluoro-1-hexene                                                                   | 19430-93-4   | FC(F)(F)C(F)(F)C(F)(F)C(F)(F)C=C                                                                    | -6.40 | 0.67 | 1.81 | P | IN  |
| QL02916 | (3,3,4,4,5,5,6,6,6-Nonafluoro-1-iodohex-1-en-1-yl)benzene                                     | 109574-90-5  | FC(F)(F)C(F)(F)C(F)(F)C(F)(F)C=C(I)C1=CC=CC=C1                                                      | -6.84 | 0.64 | 2.42 | P | IN  |
| QL02917 | [(1Z)-3,3,4,4,5,5,6,6,6-Nonafluorohex-1-en-1-yl]benzene                                       | 95452-53-2   | FC(F)(F)C(F)(F)C(F)(F)C(F)(F)C=C/c1ccccc1                                                           | -6.80 | 0.64 | 2.43 | P | OUT |
| QL02918 | 4,4,5,5,6,6,7,7,7-Nonafluorohepta-1,2-diene (5E)-                                             | 132673-98-4  | FC(F)(F)C(F)(F)C(F)(F)C(F)(F)C=C=C                                                                  | -6.13 | 0.65 | 1.91 | P | IN  |
| QL02919 | 1,1,1,2,2,3,3,4,4,7,7,8,8,9,9,10,10,11,11,12,12,13,13,14,14,14-Hexacosafuorotetradec-5-ene    | 51249-69-5   | FC(F)(F)C(F)(F)C(F)(F)C(F)(F)C=CC(F)(F)C(F)(F)C(F)(F)C(F)(F)C(F)(F)C(F)(F)C(F)(F)C(F)(F)F           | -9.21 | 0.69 | 2.93 | P | OUT |
| QL02920 | (5E)-1,1,1,2,2,3,3,4,4,7,7,8,8,9,9,10,10,11,11,12,12,12-Docosafuorododec-5-ene                | 51249-66-2   | FC(F)(F)C(F)(F)C(F)(F)C(F)(F)C=CC(F)(F)C(F)(F)C(F)(F)C(F)(F)C(F)(F)C(F)(F)C(F)(F)F                  | -8.75 | 0.69 | 2.73 | P | IN  |
| QL02921 | 1,1,1,2,2,3,3,4,4,7,7,8,8,9,9,10,10,11,11,11-Icosafuoroundec-5-ene                            | 100508-28-9  | FC(F)(F)C(F)(F)C(F)(F)C(F)(F)C=CC(F)(F)C(F)(F)C(F)(F)C(F)(F)C(F)(F)C(F)(F)F                         | -8.51 | 0.68 | 2.63 | P | IN  |
| QL02922 | 1,1,1,2,2,3,3,4,4,7,7,8,8,9,9,10,10,10-Octadecafluorodec-5-ene                                | 84551-43-9   | FC(F)(F)C(F)(F)C(F)(F)C(F)(F)C=CC(F)(F)C(F)(F)C(F)(F)C(F)(F)F                                       | -8.11 | 0.68 | 2.45 | P | IN  |
| QL02923 | Perfluorovaleraldehyde                                                                        | 375-53-1     | FC(F)(F)C(F)(F)C(F)(F)C(F)(F)C=O                                                                    | -6.40 | 0.67 | 1.81 | P | IN  |
| QL02924 | Perfluorobutylcyclohexane                                                                     | 374-60-7     | FC(F)(F)C(F)(F)C(F)(F)C(F)(F)C1(F)C(F)(F)C(F)(F)C(F)(F)C1(F)F                                       | -8.02 | 0.70 | 2.19 | P | IN  |
| QL02925 | Perfluorodecahydro-1-(perfluorobutyl)naphthalene                                              | 118914-93-5  | FC(F)(F)C(F)(F)C(F)(F)C(F)(F)C1(F)C(F)(F)C(F)(F)C(F)(F)C2(F)C(F)(F)C(F)(F)C(F)(F)C(F)(F)C1(F)C2(F)F | -8.40 | 0.70 | 2.34 | P | IN  |
| QL02926 | Perfluorodecahydro-2-n-butyl-naphthalene                                                      | 119107-96-9  | FC(F)(F)C(F)(F)C(F)(F)C(F)(F)C1(F)C(F)(F)C(F)(F)C2(F)C(F)(F)C(F)(F)C(F)(F)C(F)(F)C2(F)C1(F)F        | -8.74 | 0.70 | 2.51 | P | IN  |
| QL02927 | Furan, 2,2,3,3,4,4,5,5-heptafluorotetrahydro-4-(nonafluorobutyl)-                             | 646-85-5     | FC(F)(F)C(F)(F)C(F)(F)C(F)(F)C1(F)C(F)(F)OC(F)(F)C1(F)F                                             | -7.67 | 0.69 | 2.10 | P | IN  |
| QL02928 | 3,4,4-Trifluoro-3-(nonafluorobutyl)-1,2lambda~6~-oxathietane-2,2-dione                        | 85211-95-6   | FC(F)(F)C(F)(F)C(F)(F)C(F)(F)C1(F)C(F)(F)OS1(=O)=O                                                  | -7.19 | 0.69 | 1.87 | P | IN  |
| QL02929 | 2,2,3-Trifluoro-3-(nonafluorobutyl)oxirane                                                    | 72804-48-9   | FC(F)(F)C(F)(F)C(F)(F)C(F)(F)C1(F)OC1(F)F                                                           | -7.27 | 0.69 | 1.90 | P | IN  |
| QL02930 | 2-(Nonafluorobutyl)-4H-1-benzopyran-4-one                                                     | 304877-96-1  | FC(F)(F)C(F)(F)C(F)(F)C(F)(F)C1=CC(=O)c2ccccc2O1                                                    | -7.05 | 0.64 | 2.44 | P | IN  |
| QL02931 | 6-(Nonafluorobutyl)-2-phenylpyrimidin-4(3H)-one                                               | 180748-44-1  | FC(F)(F)C(F)(F)C(F)(F)C(F)(F)C1=CC(=O)NC(=N1)c1ccccc1                                               | -6.91 | 0.63 | 2.52 | P | OUT |
| QL02932 | 6-(Nonafluorobutyl)-2-sulfanylidene-2,3-dihydropyrimidin-4(1H)-one                            | 1426894-99-6 | FC(F)(F)C(F)(F)C(F)(F)C(F)(F)C1=CC(=O)NC(=S)N1                                                      | -6.74 | 0.65 | 2.17 | P | IN  |
| QL02933 | 9-(Nonafluorobutyl)-2,3,6,7-tetrahydro-1H,5H,11H-pyrano[2,3-f]pyrido[3,2,1-ij]quinolin-11-one | 355822-08-1  | FC(F)(F)C(F)(F)C(F)(F)C(F)(F)C1=CC(=O)Oc2c3CCCN4CCCC(cc12)c34                                       | -6.99 | 0.64 | 2.51 | P | IN  |
| QL02934 | Benzene, (nonafluorobutyl)-                                                                   | 2398-75-6    | FC(F)(F)C(F)(F)C(F)(F)C(F)(F)C1=CC=CC=C1                                                            | -6.58 | 0.65 | 2.18 | P | IN  |
| QL02935 | 2-(Nonafluorobutyl)-1H-indene                                                                 | 1608112-37-3 | FC(F)(F)C(F)(F)C(F)(F)C(F)(F)C1=Cc2ccccc2C1                                                         | -6.78 | 0.65 | 2.26 | P | IN  |
| QL02936 | SCHEMBL1270621                                                                                | 58671-28-6   | FC(F)(F)C(F)(F)C(F)(F)C(F)(F)C1=CNC(=O)NC1=O                                                        | -6.90 | 0.65 | 2.24 | P | IN  |
| QL02937 | 4-(Nonafluorobutyl)-1,3-dihydro-2H-1,5-benzodiazepin-2-one                                    | 96146-12-2   | FC(F)(F)C(F)(F)C(F)(F)C(F)(F)C1=Nc2ccccc2NC(=O)C1                                                   | -6.86 | 0.64 | 2.42 | P | IN  |
| QL02938 | 2-(Nonafluorobutyl)-1-benzofuran                                                              | 1608112-36-2 | FC(F)(F)C(F)(F)C(F)(F)C(F)(F)C1cc2ccccc2o1                                                          | -6.78 | 0.65 | 2.26 | P | IN  |
| QL02939 | 2-(Nonafluorobutyl)-1-benzothiophene                                                          | 1608112-38-4 | FC(F)(F)C(F)(F)C(F)(F)C(F)(F)C1cc2ccccc2s1                                                          | -6.78 | 0.65 | 2.26 | P | IN  |
| QL02940 | 4-(Nonafluorobutyl)benzene-1,2-dicarbonitrile                                                 | 1207299-71-5 | FC(F)(F)C(F)(F)C(F)(F)C(F)(F)C1ccc(C#N)c(c1)C#N                                                     | -6.79 | 0.63 | 2.45 | P | OUT |
| QL02941 | 1-Ethenyl-4-(nonafluorobutyl)benzene                                                          | 159241-92-6  | FC(F)(F)C(F)(F)C(F)(F)C(F)(F)C1ccc(C=C)cc1                                                          | -7.03 | 0.64 | 2.47 | P | IN  |
| QL02942 | 4-(Nonafluorobutyl)benzonitrile                                                               | 137052-16-5  | FC(F)(F)C(F)(F)C(F)(F)C(F)(F)C1ccc(cc1)C#N                                                          | -7.03 | 0.64 | 2.47 | P | IN  |
| QL02943 | 7-(Nonafluorobutyl)-1-benzothiophene                                                          | 1608112-40-8 | FC(F)(F)C(F)(F)C(F)(F)C(F)(F)C1cccc2ccsc12                                                          | -6.54 | 0.65 | 2.16 | P | IN  |
| QL02944 | Tetrahydro(perfluorobutyl)furan                                                               | 26446-59-3   | FC(F)(F)C(F)(F)C(F)(F)C(F)(F)C1CCCCO1                                                               | -6.26 | 0.65 | 1.91 | P | IN  |
| QL02945 | 2-(Nonafluorobutyl)thiophene                                                                  | 96721-81-2   | FC(F)(F)C(F)(F)C(F)(F)C(F)(F)C1cccs1                                                                | -6.26 | 0.65 | 1.91 | P | IN  |
| QL02946 | 3-(Nonafluorobutyl)-1H-indole                                                                 | 1608112-33-9 | FC(F)(F)C(F)(F)C(F)(F)C(F)(F)C1cNc2ccccc12                                                          | -6.71 | 0.65 | 2.24 | P | IN  |
| QL02947 | Nonafluorobutylepoxide                                                                        | 89807-87-4   | FC(F)(F)C(F)(F)C(F)(F)C(F)(F)C1CO1                                                                  | -6.59 | 0.67 | 1.81 | P | IN  |
| QL02948 | 4-(Nonafluorobutyl)-1,3-dioxolan-2-one                                                        | 1469980-27-5 | FC(F)(F)C(F)(F)C(F)(F)C(F)(F)C1COC(=O)O1                                                            | -6.92 | 0.66 | 2.18 | P | IN  |

[illegible]

|         |                                                                        |              |                                                                                                |       |      |      |   |     |
|---------|------------------------------------------------------------------------|--------------|------------------------------------------------------------------------------------------------|-------|------|------|---|-----|
| QL02986 | 1,1,1,2,2,3,3,4,4,11,11,12,12,13,13,14,14,14-Octadecafluorotetradecane | 1835252-03-3 | FC(F)(F)C(F)(F)C(F)(F)C(F)(F)CCCCCCC(F)(F)C(F)(F)C(F)(F)C(F)(F)F                               | -8.19 | 0.66 | 2.81 | P | IN  |
| QL02987 | 1,1,1,2,2,3,3,4,4,13,13,14,14,15,15,16,16-Octadecafluorohexadecane     | 1835252-00-0 | FC(F)(F)C(F)(F)C(F)(F)C(F)(F)CCCCCCCC(F)(F)C(F)(F)C(F)(F)C(F)(F)F                              | -8.24 | 0.65 | 2.97 | P | IN  |
| QL02988 | 12,12,13,13,14,14,15,15,15-Nonafluoropentadecanoyl chloride            | 118624-68-3  | FC(F)(F)C(F)(F)C(F)(F)C(F)(F)CCCCCCCCC(Cl)=O                                                   | -7.12 | 0.60 | 3.02 | P | OUT |
| QL02989 | 1,1,1,2,2,3,3,4,4,15,15,16,16,17,17,18,18-Octadecafluorooctadecane     | 1835251-99-4 | FC(F)(F)C(F)(F)C(F)(F)C(F)(F)CCCCCCCCC(F)(F)C(F)(F)C(F)(F)C(F)(F)F                             | -8.30 | 0.64 | 3.11 | P | OUT |
| QL02990 | 15-Bromo-1,1,1,2,2,3,3,4,4-nonafluoropentadecane                       | 213207-95-5  | FC(F)(F)C(F)(F)C(F)(F)C(F)(F)CCCCCCCCCBr                                                       | -6.89 | 0.60 | 3.04 | P | OUT |
| QL02991 | 1,1,1,2,2,3,3,4,4-Nonafluoro-8-iodooctane                              | 99324-98-8   | FC(F)(F)C(F)(F)C(F)(F)C(F)(F)CCCCI                                                             | -6.41 | 0.63 | 2.28 | P | OUT |
| QL02992 | 4,4,5,5,6,6,7,7,7-Nonafluoroheptyl iodide                              | 183547-74-2  | FC(F)(F)C(F)(F)C(F)(F)C(F)(F)CCCCI                                                             | -6.48 | 0.64 | 2.21 | P | IN  |
| QL02993 | 4,4,5,5,6,6,7,7,7-Nonafluoroheptyl prop-2-enoate                       | 443145-46-8  | FC(F)(F)C(F)(F)C(F)(F)C(F)(F)CCOC(=O)C=C                                                       | -6.77 | 0.63 | 2.51 | P | OUT |
| QL02994 | 4,4,5,5,6,6,7,7,7-Nonafluoroheptyl carbonochloridate                   | 821806-42-2  | FC(F)(F)C(F)(F)C(F)(F)C(F)(F)CCOC(Cl)=O                                                        | -6.85 | 0.64 | 2.44 | P | IN  |
| QL02995 | (3,3,4,4,5,5,6,6-Nonafluorohexyl)carbonimidoyl                         | 142030-27-1  | FC(F)(F)C(F)(F)C(F)(F)C(F)(F)CCN=C(Cl)Cl                                                       | -6.70 | 0.64 | 2.27 | P | IN  |
| QL02996 | Bis(3,3,4,4,5,5,6,6-nonafluorohexyl) butanedioate                      | 508194-70-5  | FC(F)(F)C(F)(F)C(F)(F)C(F)(F)CCOC(=O)CCC(=O)OCCCF(F)(F)C(F)(F)C(F)(F)F                         | -8.53 | 0.65 | 3.14 | P | OUT |
| QL02997 | bis((Perfluorobutyl)ethyl) carbonate                                   | 1132677-78-1 | FC(F)(F)C(F)(F)C(F)(F)C(F)(F)CCOC(=O)OCCCF(F)(F)C(F)(F)C(F)(F)F                                | -8.42 | 0.66 | 2.95 | P | IN  |
| QL02998 | 3,3,4,4,5,5,6,6,6-Nonafluorohexyl carbonochloridate                    | 40678-17-9   | FC(F)(F)C(F)(F)C(F)(F)C(F)(F)CCOC(Cl)=O                                                        | -6.70 | 0.64 | 2.27 | P | IN  |
| QL02999 | 6-(Ethenyloxy)-1,1,1,2,2,3,3,4,4-nonafluorohexane                      | 63391-84-4   | FC(F)(F)C(F)(F)C(F)(F)C(F)(F)CCOC=C                                                            | -6.41 | 0.63 | 2.28 | P | OUT |
| QL03000 | 3,3,4,4,5,5,6,6,6-Nonafluorohexyl formate                              | 78689-20-0   | FC(F)(F)C(F)(F)C(F)(F)C(F)(F)CCOC=O                                                            | -6.41 | 0.63 | 2.28 | P | OUT |
| QL03001 | 1,1,1,2,2,3,3,4,4-Nonafluoro-6-[(prop-2-en-1-yl)oxy]hexane             | 188298-09-1  | FC(F)(F)C(F)(F)C(F)(F)C(F)(F)CCOCC=C                                                           | -6.57 | 0.63 | 2.46 | P | OUT |
| QL03002 | 2-[(3,3,4,4,5,5,6,6-Nonafluorohexyl)oxy]methyl)oxirane                 | 384828-82-4  | FC(F)(F)C(F)(F)C(F)(F)C(F)(F)CCOCC1CO1                                                         | -7.01 | 0.64 | 2.44 | P | IN  |
| QL03003 | 3-[(3,3,4,4,5,5,6,6-Nonafluorohexyl)oxy]propanenitrile                 | 56300-32-4   | FC(F)(F)C(F)(F)C(F)(F)C(F)(F)CCOCC#N                                                           | -6.52 | 0.62 | 2.52 | P | OUT |
| QL03004 | Tris(1H,1H,2H,2H-perfluorohexyl) phosphate                             | 1887067-55-1 | FC(F)(F)C(F)(F)C(F)(F)C(F)(F)CCOP(=O)(OCCCF)(F)C(F)(F)C(F)(F)C(F)(F)OCCCF(F)(F)C(F)(F)C(F)(F)F | -8.60 | 0.67 | 2.92 | P | IN  |
| QL03005 | 3,3,4,4,5,5,6,6,6-Nonafluorohexyl trifluoromethanesulfonate            | 171182-86-8  | FC(F)(F)C(F)(F)C(F)(F)C(F)(F)CCOS(=O)(=O)C(F)(F)F                                              | -7.65 | 0.67 | 2.39 | P | IN  |
| QL03006 | 3,3,4,4,5,5,6,6,6-Nonafluoro-1-hexanethiol                             | 68140-20-5   | FC(F)(F)C(F)(F)C(F)(F)C(F)(F)CCS                                                               | -6.13 | 0.65 | 1.91 | P | IN  |
| QL03007 | n2 fluorotelomer sulfonyl propano-amido alkyl sulfonic acids, n=2      |              | FC(F)(F)C(F)(F)C(F)(F)C(F)(F)CCS(CCC(NC(C)(C)CS(O)(=O)=O)=O)=O                                 | -8.09 | 0.65 | 2.90 | P | IN  |
| QL03008 | n2 fluorotelomer thioamido sulfonic acids, n=2                         |              | FC(F)(F)C(F)(F)C(F)(F)C(F)(F)CCS(CCC(NC(C)(C)CS(O)(=O)=O)=O)=O                                 | -7.84 | 0.64 | 2.89 | P | OUT |
| QL03009 | n2 fluorotelomer sulfonyl propanoic acids, n=2                         |              | FC(F)(F)C(F)(F)C(F)(F)C(F)(F)CCS(CCC(O)=O)=O)=O                                                | -7.22 | 0.65 | 2.47 | P | IN  |
| QL03010 | n2 fluorotelomer sulfonamido betaine-related, n=2                      |              | FC(F)(F)C(F)(F)C(F)(F)C(F)(F)CCS(NCCC[N+](CC(O)=O)(C)C)=O                                      | -7.77 | 0.64 | 2.89 | P | OUT |
| QL03011 | 3,3,4,4,5,5,6,6,6-Nonafluorohexyl thiocyanate                          | 26650-08-8   | FC(F)(F)C(F)(F)C(F)(F)C(F)(F)CCSC#N                                                            | -6.41 | 0.63 | 2.28 | P | OUT |
| QL03012 | n2 fluorotelomer thio alkyl amido betaine-related, n=2                 |              | FC(F)(F)C(F)(F)C(F)(F)C(F)(F)CCSCC(NCCC[N+](C)C)CC(O)=O                                        | -7.58 | 0.62 | 3.04 | P | OUT |
| QL03013 | n2 fluorotelomer thio alkyl amido ammonium, n=2                        |              | FC(F)(F)C(F)(F)C(F)(F)C(F)(F)CCSCC(NCCCN(C)C)=O                                                | -7.19 | 0.62 | 2.92 | P | OUT |
| QL03014 | n2 fluorotelomer thio alkyl amido sulfonic acids, n=2                  |              | FC(F)(F)C(F)(F)C(F)(F)C(F)(F)CCSCCC(NC(C)(C)CS(O)(=O)=O)=O                                     | -7.68 | 0.64 | 2.87 | P | OUT |
| QL03015 | 1-Iodo-1H,1H-nonafluoropentane                                         | 2253-14-7    | FC(F)(F)C(F)(F)C(F)(F)C(F)(F)CI                                                                | -6.40 | 0.67 | 1.81 | P | IN  |
| QL03016 | 1-Chlorononafluorobutane                                               | 558-89-4     | FC(F)(F)C(F)(F)C(F)(F)C(F)(F)Cl                                                                | -6.18 | 0.68 | 1.45 | P | IN  |
| QL03017 | 2,2,3,3,4,4,5,5,5-Nonafluoropentyl acrylate                            | 308-26-9     | FC(F)(F)C(F)(F)C(F)(F)C(F)(F)COC(=O)C=C                                                        | -6.68 | 0.64 | 2.27 | P | IN  |
| QL03018 | 1,1,1,2,2,3,3,4,4-Nonafluoro-5-[(prop-2-en-1-yl)oxy]pentane            | 646063-05-0  | FC(F)(F)C(F)(F)C(F)(F)C(F)(F)COCC=C                                                            | -6.41 | 0.63 | 2.28 | P | OUT |
| QL03019 | 5-[2-(Ethenyloxy)ethoxy]-1,1,1,2,2,3,3,4,4-nonafluoropentane           | 572911-07-0  | FC(F)(F)C(F)(F)C(F)(F)C(F)(F)COCCOC=C                                                          | -6.52 | 0.62 | 2.52 | P | OUT |
| QL03020 | Perfluorobutane                                                        | 355-25-9     | FC(F)(F)C(F)(F)C(F)(F)C(F)(F)F                                                                 | -6.18 | 0.68 | 1.45 | P | IN  |
| QL03021 | Perfluoro-2-butyl-3-propyloxaziridine                                  | 143813-70-1  | FC(F)(F)C(F)(F)C(F)(F)C(F)(F)N1OC1(F)C(F)(F)C(F)(F)F                                           | -8.24 | 0.69 | 2.43 | P | IN  |
| QL03022 | Nonafluorobutyl prop-2-enoate                                          | 2708-03-4    | FC(F)(F)C(F)(F)C(F)(F)C(F)(F)OC(=O)C=C                                                         | -6.67 | 0.65 | 2.19 | P | IN  |
| QL03023 | ether-substituted perfluoroalkyl (linear) carboxylic acids_i, n=4      |              | FC(F)(F)C(F)(F)C(F)(F)C(F)(F)OC(F)(C(F)(F)F)C(O)=O                                             | -7.22 | 0.67 | 2.11 | P | IN  |
| QL03024 | Ether, bis(nonafluorobutyl)                                            | 308-48-5     | FC(F)(F)C(F)(F)C(F)(F)C(F)(F)OC(F)(F)C(F)(F)C(F)(F)F                                           | -8.08 | 0.69 | 2.38 | P | IN  |
| QL03025 | 1-Bromoperfluoro-2,5,8-trioxadodecane                                  | 330562-47-5  | FC(F)(F)C(F)(F)C(F)(F)C(F)(F)OC(F)(F)C(F)(F)OC(F)(F)OC(F)(F)OC(F)(F)Br                         | -8.37 | 0.67 | 2.69 | P | IN  |

|         |                                                                                                                                                                                          |              |                                                                                                         |       |      |      |   |     |
|---------|------------------------------------------------------------------------------------------------------------------------------------------------------------------------------------------|--------------|---------------------------------------------------------------------------------------------------------|-------|------|------|---|-----|
| QL03026 | 4-Pyridinecarboxamide, N-[4-(nonafluorobutoxy)phenyl]-                                                                                                                                   | 62315-14-4   | FC(F)(F)C(F)(F)C(F)(F)C(F)(F)OC1=CC=C(NC(=O)C2=CC=NC=C2)C=C1                                            | -7.40 | 0.62 | 2.90 | P | OUT |
| QL03027 | 3-Pyridinecarboxamide, N-[4-(nonafluorobutoxy)phenyl]-                                                                                                                                   | 62315-07-5   | FC(F)(F)C(F)(F)C(F)(F)C(F)(F)OC1=CC=C(NC(=O)C2=CC=NC=C2)C=C1                                            | -7.40 | 0.62 | 2.90 | P | OUT |
| QL03028 | Tris(nonafluorobutyl)(oxo)-lambda5--phosphane                                                                                                                                            | 58431-34-8   | FC(F)(F)C(F)(F)C(F)(F)C(F)(F)P(=O)(C(F)(F)C(F)(F)C(F)(F)F)C(F)(F)C(F)(F)F                               | -8.26 | 0.69 | 2.38 | P | IN  |
| QL03029 | Phosphorane, difluorotris(nonafluorobutyl)-[5-(1,1,2,2,3,3,4,4,4-Nonafluorobutane-1-sulfonimidoyl)benzene                                                                                | 91543-34-9   | FC(F)(F)C(F)(F)C(F)(F)C(F)(F)P(F)(F)C(F)(F)C(F)(F)C(F)(F)C(F)(F)C(F)(F)C(F)(F)F                         | -8.44 | 0.70 | 2.40 | P | IN  |
| QL03030 |                                                                                                                                                                                          | 1335014-68-0 | FC(F)(F)C(F)(F)C(F)(F)C(F)(F)S(=N)(=O)c1ccccc1                                                          | -6.91 | 0.65 | 2.24 | P | IN  |
| QL03031 | N-[(4-Bromophenyl)(perfluorobutyl)oxido-lambda-sulfanylidene]-1,1,1-trifluoromethanesulfonamide                                                                                          | 1421133-01-8 | FC(F)(F)C(F)(F)C(F)(F)C(F)(F)S(=O)(=NS(=O)(=O)C(F)(F)F)C1=CC=C(Br)C=C1                                  | -7.46 | 0.66 | 2.40 | P | IN  |
| QL03032 | bis(Perfluorobutylsulfonyl)methylenephenyliodine 1-[Bis(1,1,2,2,3,3,4,4,4-nonafluorobutane-1-sulfonyl)methanesulfonyl]-1,1,2,2,3,3,4,4,4-nonafluorobutane                                | 681477-42-9  | FC(F)(F)C(F)(F)C(F)(F)C(F)(F)S(=O)(=O)C(=[I])C1=CC=CC=C1S(=O)(=O)C(F)(F)C(F)(F)C(F)(F)F                 | -8.03 | 0.67 | 2.63 | P | IN  |
| QL03033 |                                                                                                                                                                                          | 182505-69-7  | FC(F)(F)C(F)(F)C(F)(F)C(F)(F)S(=O)(=O)C(S(=O)(=O)C(F)(F)C(F)(F)C(F)(F)F)S(=O)(=O)C(F)(F)C(F)(F)C(F)(F)F | -8.67 | 0.69 | 2.61 | P | IN  |
| QL03034 | [(1,1,2,2,3,3,4,4,4-Nonafluorobutane-1-sulfonyl)ethynyl]benzene                                                                                                                          | 63369-94-8   | FC(F)(F)C(F)(F)C(F)(F)C(F)(F)S(=O)(=O)C#CC1=CC=CC=C1                                                    | -7.22 | 0.64 | 2.53 | P | IN  |
| QL03035 | 2-{(1,1,2,2,3,3,4,4,4-Nonafluorobutane-1-sulfonyl)-1-phenylethan-1-one                                                                                                                   | 58510-75-1   | FC(F)(F)C(F)(F)C(F)(F)C(F)(F)S(=O)(=O)CC(=O)C1=CC=CC=C1                                                 | -7.26 | 0.65 | 2.53 | P | IN  |
| QL03036 | [(1,1,2,2,3,3,4,4,4-Nonafluorobutane-1-sulfonyl)methyl]benzene                                                                                                                           | 879081-10-4  | FC(F)(F)C(F)(F)C(F)(F)C(F)(F)S(=O)(=O)C1ccccc1                                                          | -7.21 | 0.65 | 2.47 | P | IN  |
| QL03037 | 1,1,1,2,2,3,3,4,4,4-Nonafluoro-4-[(1,1,2,2,3,3,4,4,4-nonafluorobutane-1-sulfonyl)methanesulfonyl]butane N-[(4-Bromophenyl)oxido(trifluoromethyl)sulfanylidene]perfluorobutanesulfonamide | 29214-37-7   | FC(F)(F)C(F)(F)C(F)(F)C(F)(F)S(=O)(=O)CS(=O)(=O)C(F)(F)C(F)(F)C(F)(F)C(F)(F)F                           | -8.64 | 0.69 | 2.63 | P | IN  |
| QL03038 | 1-{(1,1,2,2,3,3,4,4,4-Nonafluorobutane-1-sulfonyl)-1H-benzotriazole                                                                                                                      | 1421133-00-7 | FC(F)(F)C(F)(F)C(F)(F)C(F)(F)S(=O)(=O)N=S(=O)(=O)C1=CC=C(Br)C=C1)C(F)(F)F                               | -7.86 | 0.66 | 2.60 | P | IN  |
| QL03039 | N-(1,1,2,2,3,3,4,4,4-Nonafluorobutane-1-sulfonyl)cyclopent-2-ene-1-carboxamide                                                                                                           | 681443-29-8  | FC(F)(F)C(F)(F)C(F)(F)C(F)(F)S(=O)(=O)n1nnc2ccccc12                                                     | -7.30 | 0.65 | 2.45 | P | IN  |
| QL03040 | N-(1,1,2,2,3,3,4,4,4-Nonafluorobutane-1-sulfonyl)cyclopent-2-ene-1-carboxamide                                                                                                           | 1440968-24-0 | FC(F)(F)C(F)(F)C(F)(F)C(F)(F)S(=O)(=O)NC(=O)C1CCC=C1                                                    | -7.30 | 0.65 | 2.47 | P | IN  |
| QL03041 | N-(1,1,2,2,3,3,4,4,4-Nonafluorobutane-1-sulfonyl)cyclopentanecarboxamide                                                                                                                 | 1440968-21-7 | FC(F)(F)C(F)(F)C(F)(F)C(F)(F)S(=O)(=O)NC(=O)C1CCCC1                                                     | -7.30 | 0.65 | 2.47 | P | IN  |
| QL03042 | N-(1,1,2,2,3,3,4,4,4-Nonafluorobutane-1-sulfonyl)cyclohexanecarboxamide                                                                                                                  | 1440968-37-5 | FC(F)(F)C(F)(F)C(F)(F)C(F)(F)S(=O)(=O)NC(=O)C1CCCCC1                                                    | -7.26 | 0.65 | 2.53 | P | IN  |
| QL03043 | N,N'-(3,4-Dioxocyclobut-1-ene-1,2-diyl)bis(1,1,2,2,3,3,4,4,4-nonafluorobutane-1-sulfonamide)                                                                                             |              |                                                                                                         | -8.95 | 0.68 | 2.93 | P | OUT |
| QL03043 |                                                                                                                                                                                          | 1234571-87-9 | FC(F)(F)C(F)(F)C(F)(F)C(F)(F)S(=O)(=O)NC1=C(NS(=O)(=O)C(F)(F)C(F)(F)C(F)(F)C(F)(F)C(=O)C1=O             |       |      |      |   |     |
| QL03044 | N-Cyclooctyl-1,1,2,2,3,3,4,4,4-nonafluorobutane-1-sulfonamide                                                                                                                            | 1456900-48-3 | FC(F)(F)C(F)(F)C(F)(F)C(F)(F)S(=O)(=O)NC1CCCCCCC1                                                       | -7.00 | 0.64 | 2.53 | P | OUT |
| QL03045 | 1,1,2,2,3,3,4,4,4-nonafluoro-N-[(trifluoromethyl)sulfonyl]-1-Butanesulfonamide                                                                                                           | 39847-37-5   | FC(F)(F)C(F)(F)C(F)(F)C(F)(F)S(=O)(=O)NS(=O)(=O)C(F)(F)F                                                | -7.73 | 0.68 | 2.23 | P | IN  |
| QL03046 | Vinyl nonafluoro-1-butanesulfonate                                                                                                                                                       | 42409-05-2   | FC(F)(F)C(F)(F)C(F)(F)C(F)(F)S(=O)(=O)OC=C                                                              | -6.87 | 0.66 | 2.17 | P | IN  |
| QL03047 | Phenyl nonafluorobutane-1-sulfonate                                                                                                                                                      | 25628-11-9   | FC(F)(F)C(F)(F)C(F)(F)C(F)(F)S(=O)(=O)OC1=CC=CC=C1                                                      | -7.21 | 0.65 | 2.47 | P | IN  |
| QL03048 | Cyclopent-1-en-1-yl nonafluorobutane-1-sulfonate                                                                                                                                         | 36839-94-8   | FC(F)(F)C(F)(F)C(F)(F)C(F)(F)S(=O)(=O)OC1=CCCC1                                                         | -6.95 | 0.65 | 2.24 | P | IN  |
| QL03049 | Cyclohex-1-en-1-yl nonafluorobutane-1-sulfonate                                                                                                                                          | 36839-95-9   | FC(F)(F)C(F)(F)C(F)(F)C(F)(F)S(=O)(=O)OC1=CCCCC1                                                        | -7.21 | 0.65 | 2.47 | P | IN  |
| QL03050 | Cyclohept-1-en-1-yl nonafluorobutane-1-sulfonate                                                                                                                                         | 42108-79-2   | FC(F)(F)C(F)(F)C(F)(F)C(F)(F)S(=O)(=O)OC1=CCCCC1                                                        | -7.03 | 0.64 | 2.47 | P | IN  |
| QL03051 | 4-Cyanophenyl nonafluorobutane-1-sulfonate                                                                                                                                               | 626201-15-8  | FC(F)(F)C(F)(F)C(F)(F)C(F)(F)S(=O)(=O)Oc1cccc(c1)C#N                                                    | -7.50 | 0.64 | 2.68 | P | IN  |
| QL03052 | 2,4-Dichlorophenyl nonafluorobutane-1-sulfonate                                                                                                                                          | 32848-21-8   | FC(F)(F)C(F)(F)C(F)(F)C(F)(F)S(=O)(=O)Oc1ccc(Cl)cc1Cl                                                   | -7.50 | 0.65 | 2.52 | P | IN  |
| QL03053 | Quinolin-8-yl nonafluorobutane-1-sulfonate                                                                                                                                               | 41605-60-1   | FC(F)(F)C(F)(F)C(F)(F)C(F)(F)S(=O)(=O)Oc1cccc2cccn12                                                    | -7.16 | 0.64 | 2.51 | P | IN  |
| QL03054 | 2-Cyanophenyl nonafluorobutane-1-sulfonate                                                                                                                                               | 873838-37-0  | FC(F)(F)C(F)(F)C(F)(F)C(F)(F)S(=O)(=O)Oc1cccc1C#N                                                       | -7.01 | 0.64 | 2.45 | P | IN  |
| QL03055 | 1,2-Ethanediyl bis(perfluorobutanesulfonate) 2-[(1,1,2,2,3,3,4,4,4-Nonafluorobutane-1-sulfonyl)oxy]-3a,4,7,7a-tetrahydro-1H-4,7-methanoisindole-1,3(2H)-dione                            | 92982-03-1   | FC(F)(F)C(F)(F)C(F)(F)C(F)(F)S(=O)(=O)OCCOS(=O)(=O)C(F)(F)C(F)(F)C(F)(F)C(F)(F)F                        | -8.70 | 0.67 | 2.85 | P | IN  |
| QL03056 |                                                                                                                                                                                          | 307531-76-6  | FC(F)(F)C(F)(F)C(F)(F)C(F)(F)S(=O)(=O)ON1C(=O)C2C3CC(C=C3)C2C1=O                                        | -7.61 | 0.66 | 2.50 | P | IN  |
| QL03057 | 1,1,2,2,3,3,4,4,4-nonafluoro-N-(2-hydroxyethyl)-1-Butanesulfonamide                                                                                                                      | 34454-99-4   | FC(F)(F)C(F)(F)C(F)(F)C(F)(F)S(=O)(=O)(NCCO)=O                                                          | -6.81 | 0.65 | 2.25 | P | IN  |
| QL03058 | [1-(1,1,2,2,3,3,4,4,4-Nonafluorobutane-1-sulfinyl)ethenyl]benzene                                                                                                                        | 1606997-41-4 | FC(F)(F)C(F)(F)C(F)(F)C(F)(F)S(=O)C(=C)c1ccccc1                                                         | -6.99 | 0.64 | 2.45 | P | IN  |
| QL03059 | Perfluoro-1-butanesulfonyl chloride                                                                                                                                                      | 2991-84-6    | FC(F)(F)C(F)(F)C(F)(F)C(F)(F)S(Cl)(=O)=O                                                                | -6.93 | 0.69 | 1.79 | P | IN  |

|         |                                                                          |              |                                                                                    |
|---------|--------------------------------------------------------------------------|--------------|------------------------------------------------------------------------------------|
| QL03060 | Perfluorobutanesulfinyl chloride                                         | 41006-41-1   | FC(F)(F)C(F)(F)C(F)(F)C(F)(F)S(Cl)=O                                               |
| QL03061 | Perfluorobutane sulfonamidoacetic acid                                   | 347872-22-4  | FC(F)(F)C(F)(F)C(F)(F)C(F)(F)S(NC(=O)O)=O(=O)=O                                    |
| QL03062 | Perfluoroalkyl (linear) sulfinate, n=4                                   | 34642-43-8   | FC(F)(F)C(F)(F)C(F)(F)C(F)(F)S(O)=O                                                |
| QL03063 | [[Nonafluorobutyl]disulfanyl]benzene                                     | 1606997-42-5 | FC(F)(F)C(F)(F)C(F)(F)C(F)(F)SSc1ccccc1                                            |
| QL03064 | 1,1,1,2,2,3,3,4,5,5,5-Undecafluoro-4-iodopentane                         | 68158-13-4   | FC(F)(F)C(F)(F)C(F)(F)C(F)(F)I(C)F(F)F                                             |
| QL03065 | 1,1,1,2,2,3,3,5,5,5-Decafluoro-4-iodo-4-(trifluoromethyl)pentane         | 102780-88-1  | FC(F)(F)C(F)(F)C(F)(F)C(F)(F)C(F)(F)F                                              |
| QL03066 | 1-ethoxy-2,2,3,3,4,4,4-heptafluorobutan-1-ol                             | 356-26-3     | FC(F)(F)C(F)(F)C(F)(F)C(F)(F)C(F)(F)OCC                                            |
| QL03067 | 2,2,3,3,4,4,4-Heptafluoro-1-phenylbutyl diphenyl phosphate               | 98010-21-0   | FC(F)(F)C(F)(F)C(F)(F)C(F)(F)C(OP(=O)(OC1ccccc1)OC1ccccc1)c1ccccc1                 |
| QL03068 | 3,3,4,4,5,5,5-heptafluoropent-1-yne                                      | 80337-25-3   | FC(F)(F)C(F)(F)C(F)(F)C(F)(F)C#C                                                   |
| QL03069 | 4,4,5,5,6,6,6-Heptafluoro-1-phenylhex-2-yn-1-one                         | 89965-72-0   | FC(F)(F)C(F)(F)C(F)(F)C(F)(F)C#CC(=O)C1=CC=CC=C1                                   |
| QL03070 | (3,3,4,4,5,5,5-Heptafluoropent-1-yn-1-yl)benzene                         | 81674-08-0   | FC(F)(F)C(F)(F)C(F)(F)C(F)(F)C#Cc1ccccc1                                           |
| QL03071 | Heptafluorobutyronitrile                                                 | 375-00-8     | FC(F)(F)C(F)(F)C(F)(F)C(F)(F)C#N                                                   |
| QL03072 | 3,3,4,4,5,5,5-heptafluoropent-1-ene                                      | 355-08-8     | FC(F)(F)C(F)(F)C(F)(F)C(F)(F)C=C                                                   |
| QL03073 | 3-{2,2,3,3,4,4,4-Heptafluorobutylidene}oxolan-2-one                      | 89608-45-7   | FC(F)(F)C(F)(F)C(F)(F)C(F)(F)C=C1CCOC1=O                                           |
| QL03074 | 4,4,5,5,6,6,6-Heptafluoro-1-phenylhex-2-en-1-one                         | 110960-47-9  | FC(F)(F)C(F)(F)C(F)(F)C(F)(F)C=CC(=O)c1ccccc1                                      |
| QL03075 | 1,1,1,2,2,3,3,6,6,7,7,8,8,9,9,10,10,11,11-icosafuoroundec-4-ene          | 100603-63-2  | FC(F)(F)C(F)(F)C(F)(F)C(F)(F)C=CC(F)(F)C(F)(F)C(F)(F)C(F)(F)C(F)(F)C(F)(F)C(F)(F)F |
| QL03076 | 1,1,1,2,2,3,3,6,6,7,7,8,8,9,9,10,10,10-Octadecafluorodec-4-ene           | 935477-16-0  | FC(F)(F)C(F)(F)C(F)(F)C(F)(F)C=CC(F)(F)C(F)(F)C(F)(F)C(F)(F)C(F)(F)F               |
| QL03077 | 1,1,1,2,2,3,3,6,6,7,7,8,8,9,9,9-Hexadecafluoronon-4-ene                  | 935477-07-9  | FC(F)(F)C(F)(F)C(F)(F)C(F)(F)C=CC(F)(F)C(F)(F)C(F)(F)C(F)(F)F                      |
| QL03078 | 1,1,1,2,2,3,3,6,6,7,7,8,8,8-Tetradecafluorooct-4-ene                     | 3910-82-5    | FC(F)(F)C(F)(F)C(F)(F)C(F)(F)C=CC(F)(F)C(F)(F)C(F)(F)F                             |
| QL03080 | 3,3,4,4,5,5,5-Heptafluoro-1-iodo-1-pentene                               | 376-97-6     | FC(F)(F)C(F)(F)C(F)(F)C(F)(F)C=CI                                                  |
| QL03082 | (1E)-2,2,3,3,4,4,4-Heptafluoro-N-phenylbutan-1-imine                     | 62765-24-6   | FC(F)(F)C(F)(F)C(F)(F)C(F)(F)C=NC1=CC=CC=C1                                        |
| QL03083 | (1E)-2,2,3,3,4,4,4-Heptafluoro-N-(2-phenylethyl)butan-1-imine            | 29723-32-8   | FC(F)(F)C(F)(F)C(F)(F)C(F)(F)C=NC(C1=CC=CC=C1)C2=CC=CC=C2                          |
| QL03084 | Perfluorobutyraldehyde                                                   | 375-02-0     | FC(F)(F)C(F)(F)C(F)(F)C(F)(F)C=O                                                   |
| QL03085 | Undecafluoro(heptafluoropropyl)cyclohexane                               | 374-59-4     | FC(F)(F)C(F)(F)C(F)(F)C(F)(F)C1C(F)(F)C(F)(F)C(F)(F)C(F)(F)C1F(F)F                 |
| QL03086 | 2,2,3,3,4,4,5,6,6-Nonafluoro-5-(heptafluoropropyl)oxane                  | 801-26-3     | FC(F)(F)C(F)(F)C(F)(F)C(F)(F)C1C(F)(F)OC(F)(F)C(F)(F)C1F(F)F                       |
| QL03087 | 3,4,4-Trifluoro-3-(heptafluoropropyl)-1,2lambda~6~-oxathietane-2,2-dione | 156465-44-0  | FC(F)(F)C(F)(F)C(F)(F)C(F)(F)C1C(F)(F)OS1(=O)=O                                    |
| QL03088 | 2,2,3,3,4,4,5,5,6-Nonafluoro-6-(heptafluoropropyl)tetrahydro-2H-pyran    | 335-35-3     | FC(F)(F)C(F)(F)C(F)(F)C(F)(F)C1C(F)(F)OC(F)(F)C(F)(F)C(F)(F)C1F(F)F                |
| QL03089 | 2,2,3,3,4,4,5-Heptafluoro-5-(heptafluoropropyl)oxolane                   | 423-22-3     | FC(F)(F)C(F)(F)C(F)(F)C(F)(F)C1C(F)(F)OC(F)(F)C(F)(F)C1F(F)F                       |
| QL03090 | 2,2,3-Trifluoro-3-(heptafluoropropyl)oxirane                             | 74942-19-1   | FC(F)(F)C(F)(F)C(F)(F)C(F)(F)C1C(F)(F)OC1F                                         |
| QL03091 | 1,4-Bis(chloromethyl)-2-(heptafluoropropyl)benzene                       | 139263-35-7  | FC(F)(F)C(F)(F)C(F)(F)C(F)(F)C1=C(CCl)C=CC(CCl)=C1                                 |
| QL03092 | 5-(Heptafluoropropyl)-3-phenyl-1H-pyrazole                               | 54864-78-7   | FC(F)(F)C(F)(F)C(F)(F)C(F)(F)C1=CC(=NN1)C1=CC=CC=C1                                |
| QL03093 | 6-(Heptafluoropropyl)-2-sulfonylidene-2,3-dihydropyrimidin-4(1H)-one     | 88191-88-2   | FC(F)(F)C(F)(F)C(F)(F)C(F)(F)C1=CC(=O)NC(=S)N1                                     |
| QL03094 | 1-Bromo-3-(heptafluoropropyl)benzene                                     | 53104-06-6   | FC(F)(F)C(F)(F)C(F)(F)C(F)(F)C1=CC(Br)=CC=C1                                       |
| QL03095 | 2-[[4-(Heptafluoropropyl)phenyl]methyl]oxirane                           | 144006-68-8  | FC(F)(F)C(F)(F)C(F)(F)C(F)(F)C1=CC=C(CC2CO2)C=C1                                   |
| QL03096 | N-[6-(Heptafluoropropyl)-2-oxo-2H-pyran-3-yl]benzamide                   | 860454-18-8  | FC(F)(F)C(F)(F)C(F)(F)C(F)(F)C1=CC=C(NC(=O)C2cccc2)C(=O)O1                         |
| QL03097 | Quinoline, 4-(heptafluoropropyl)-                                        | 181059-73-4  | FC(F)(F)C(F)(F)C(F)(F)C(F)(F)C1=CC=NC2=CC=CC=C12                                   |
| QL03098 | AC1LC6EI                                                                 | 60007-37-6   | FC(F)(F)C(F)(F)C(F)(F)C(F)(F)C1=CNC(=O)NC1=O                                       |
| QL03099 | 5-(Heptafluoropropyl)-2-sulfonylidene-2,3-dihydropyrimidin-4(1H)-one     | 145663-11-2  | FC(F)(F)C(F)(F)C(F)(F)C(F)(F)C1=CC(=O)NC1=O                                        |
| QL03100 | (4S)-4-Benzyl-2-(heptafluoropropyl)-4,5-dihydro-1,3-oxazole              | 1366341-52-7 | FC(F)(F)C(F)(F)C(F)(F)C(F)(F)C1=N[C@H](C2Ccccc2)CO1                                |
| QL03101 | 2,4,6-Tris(heptafluoropropyl)-1,3,5-triazine                             | 915-76-4     | FC(F)(F)C(F)(F)C(F)(F)C(F)(F)C1=NC                                                 |

|         |                                                                          |              |                                                              |       |      |      |   |     |
|---------|--------------------------------------------------------------------------|--------------|--------------------------------------------------------------|-------|------|------|---|-----|
| QL03104 | 2-(Heptafluoropropyl)-1H-benzimidazole                                   | 559-37-5     | FC(F)(F)C(F)(F)C(F)(F)C1=NC2=CC=CC=C2N1                      | -6.37 | 0.64 | 2.16 | P | IN  |
| QL03105 | 2-(Perfluoropropyl)benzoxazole                                           | 2008-06-2    | FC(F)(F)C(F)(F)C(F)(F)C1=NC2=CC=CC=C2O1                      | -6.37 | 0.64 | 2.16 | P | IN  |
| QL03106 | 4-(Heptafluoropropyl)-1,3-dihydro-2H-1,5-benzodiazepin-2-one             | 96146-10-0   | FC(F)(F)C(F)(F)C(F)(F)C1=Nc2cccc2NC(=O)C1                    | -6.29 | 0.63 | 2.24 | P | OUT |
| QL03107 | 2-(heptafluoropropyl)-4,5-dihydro-1H-imidazole                           | 4472-70-2    | FC(F)(F)C(F)(F)C(F)(F)C1=NCCN1                               | -5.85 | 0.64 | 1.83 | P | IN  |
| QL03108 | 2-(Heptafluoropropyl)-1-phenyl-4,5-dihydro-1H-imidazole                  | 1069085-53-5 | FC(F)(F)C(F)(F)C(F)(F)C1=NCCN1c1ccccc1                       | -6.13 | 0.62 | 2.26 | P | OUT |
| QL03109 | 1-Benzyl-2-(heptafluoropropyl)-4,5-dihydro-1H-imidazole                  | 1069085-51-3 | FC(F)(F)C(F)(F)C(F)(F)C1=NCCN1Cc1ccccc1                      | -6.43 | 0.62 | 2.46 | P | OUT |
| QL03110 | 2-Perfluoropropyl-5-phenyl-1,3,4-oxadiazole                              | 5756-67-2    | FC(F)(F)C(F)(F)C(F)(F)C1=NN=C(O1)C1=CC=CC=C1                 | -6.56 | 0.63 | 2.43 | P | OUT |
| QL03111 | 5-(heptafluoropropyl)-1-phenyl-1H-tetrazole                              | 2712-85-8    | FC(F)(F)C(F)(F)C(F)(F)C1=NN=NN1C1=CC=CC=C1                   | -6.13 | 0.62 | 2.26 | P | OUT |
| QL03112 | 4-Bromo-2-(heptafluoropropyl)pyridine                                    | 1816283-37-0 | FC(F)(F)C(F)(F)C(F)(F)C1cc(Br)ccn1                           | -5.95 | 0.64 | 1.92 | P | IN  |
| QL03113 | 4-Chloro-2-(heptafluoropropyl)pyridine                                   | 1816283-32-5 | FC(F)(F)C(F)(F)C(F)(F)C1cc(Cl)ccn1                           | -5.95 | 0.64 | 1.92 | P | IN  |
| QL03114 | 1-Bromo-4-(heptafluoropropyl)benzene                                     | 117874-91-6  | FC(F)(F)C(F)(F)C(F)(F)C1ccc(Br)cc1                           | -6.51 | 0.64 | 2.18 | P | IN  |
| QL03115 | 5-Bromo-2-(heptafluoropropyl)pyridine                                    | 1816282-96-8 | FC(F)(F)C(F)(F)C(F)(F)C1ccc(Br)cn1                           | -6.51 | 0.64 | 2.18 | P | IN  |
| QL03116 | 1-(Heptafluoropropyl)-4-iodobenzene                                      | 1417885-93-8 | FC(F)(F)C(F)(F)C(F)(F)C1ccc(I)cc1                            | -6.51 | 0.64 | 2.18 | P | IN  |
| QL03117 | N-[5-(Heptafluoropropyl)[1,1'-biphenyl]-2-yl]benzamide                   | 748785-00-4  | FC(F)(F)C(F)(F)C(F)(F)C1ccc(NC(=O)c2ccccc2)c(c1)-c1ccccc1    | -6.76 | 0.61 | 2.78 | P | OUT |
| QL03118 | 2-(Heptafluoropropyl)quinoline                                           | 57702-79-1   | FC(F)(F)C(F)(F)C(F)(F)C1ccc2ccccc2n1                         | -6.46 | 0.63 | 2.29 | P | OUT |
| QL03119 | 5-(Heptafluoropropyl)isoquinoline-1-carbaldehyde                         | 31181-32-5   | FC(F)(F)C(F)(F)C(F)(F)C1cccc2c(C=O)nc12                      | -6.11 | 0.62 | 2.24 | P | OUT |
| QL03120 | (Heptafluoropropyl)benzene                                               | 378-98-3     | FC(F)(F)C(F)(F)C(F)(F)C1ccccc1                               | -5.79 | 0.63 | 1.92 | P | IN  |
| QL03121 | 2-(Heptafluoropropyl)cyclohexan-1-one                                    | 61282-91-5   | FC(F)(F)C(F)(F)C(F)(F)C1CCCCC1=O                             | -5.87 | 0.64 | 1.90 | P | IN  |
| QL03122 | 1-(heptafluoropropyl)-2-iodocyclohexane                                  | 2728-75-8    | FC(F)(F)C(F)(F)C(F)(F)C1CCCCC1I                              | -5.87 | 0.64 | 1.90 | P | IN  |
| QL03123 | 3-(Heptafluoropropyl)oxolane                                             | 143837-48-3  | FC(F)(F)C(F)(F)C(F)(F)C1CCOC1                                | -5.85 | 0.64 | 1.83 | P | IN  |
| QL03124 | 5-(Heptafluoropropyl)dihydropyrimidine-2,4(1H,3H)-dione                  | 90715-84-7   | FC(F)(F)C(F)(F)C(F)(F)C1CNC(=O)NC1=O                         | -6.51 | 0.64 | 2.16 | P | IN  |
| QL03125 | 5-(Heptafluoropropyl)pyrimidine                                          | 1354703-21-1 | FC(F)(F)C(F)(F)C(F)(F)C1cncnc1                               | -5.79 | 0.63 | 1.92 | P | IN  |
| QL03126 | 2-(Heptafluoropropyl)oxirane                                             | 51035-20-2   | FC(F)(F)C(F)(F)C(F)(F)C1CO1                                  | -5.74 | 0.67 | 1.46 | P | IN  |
| QL03127 | 5-(Heptafluoropropyl)-1H-pyrrole-2-carbaldehyde                          | 123825-52-5  | FC(F)(F)C(F)(F)C(F)(F)C1Nc(C=O)cc1                           | -6.35 | 0.64 | 2.18 | P | IN  |
| QL03128 | 4,6-Dichloro-2-(heptafluoropropyl)pyrimidine                             | 1023815-51-1 | FC(F)(F)C(F)(F)C(F)(F)C1nc(Cl)cc(Cl)n1                       | -6.01 | 0.64 | 1.91 | P | IN  |
| QL03129 | 2-(Heptafluoropropyl)-1H-indole                                          | 123825-50-3  | FC(F)(F)C(F)(F)C(F)(F)C1Nc2ccccc2c1                          | -6.37 | 0.64 | 2.16 | P | IN  |
| QL03130 | 2-(Heptafluoropropyl)-3-phenylquinoxaline                                | 69492-70-2   | FC(F)(F)C(F)(F)C(F)(F)C1nc2ccccc2nc1-c1ccccc1                | -5.89 | 0.62 | 2.21 | P | OUT |
| QL03131 | 4-Chloro-2-(heptafluoropropyl)pyrimidine                                 | 937676-00-1  | FC(F)(F)C(F)(F)C(F)(F)C1nccc(Cl)n1                           | -5.95 | 0.64 | 1.92 | P | IN  |
| QL03132 | 2-(Heptafluoropropyl)-1H-pyrrole                                         | 118425-75-5  | FC(F)(F)C(F)(F)C(F)(F)C1Nccc1                                | -5.85 | 0.64 | 1.83 | P | IN  |
| QL03133 | 1-(Heptafluoropropyl)isoquinoline                                        | 70414-12-9   | FC(F)(F)C(F)(F)C(F)(F)C1nccc2ccccc12                         | -6.06 | 0.63 | 2.13 | P | OUT |
| QL03134 | 2-(Heptafluoropropyl)pyrimidine                                          | 133391-64-7  | FC(F)(F)C(F)(F)C(F)(F)C1ncccn1                               | -5.79 | 0.63 | 1.92 | P | IN  |
| QL03135 | Imidazolidine, 2-heptafluoropropyl-                                      | 31185-53-2   | FC(F)(F)C(F)(F)C(F)(F)C1NCCN1                                | -5.85 | 0.64 | 1.83 | P | IN  |
| QL03136 | 2-(Heptafluoropropyl)-1H-imidazole                                       | 81769-47-3   | FC(F)(F)C(F)(F)C(F)(F)C1Nccn1                                | -5.85 | 0.64 | 1.83 | P | IN  |
| QL03138 | 4-Bromo-3-(heptafluoropropyl)-5-phenyl-1H-pyrazole                       | 82633-52-1   | FC(F)(F)C(F)(F)C(F)(F)C1nNc(c1Br):c1ccccc1                   | -6.60 | 0.63 | 2.42 | P | OUT |
| QL03139 | 5-(Heptafluoropropyl)-3-phenyl-1H-1,2,4-triazole                         | 2195-67-7    | FC(F)(F)C(F)(F)C(F)(F)C1Nnc(n1)-c1ccccc1                     | -6.56 | 0.63 | 2.43 | P | OUT |
| QL03140 | 3-(Heptafluoropropyl)-6-(morpholin-4-yl)[1,2,4]triazolo[4,3-b]pyridazine | 296886-61-8  | FC(F)(F)C(F)(F)C(F)(F)C1nnc2ccc(nn12)N1CCOCC1                | -6.69 | 0.62 | 2.53 | P | OUT |
| QL03141 | 3-(Heptafluoropropyl)-1H-pyrazole                                        | 158148-63-1  | FC(F)(F)C(F)(F)C(F)(F)C1nNcc1                                | -5.85 | 0.64 | 1.83 | P | IN  |
| QL03142 | 2(5H)-Furanone, 5-(heptafluoropropyl)-                                   | 143469-51-6  | FC(F)(F)C(F)(F)C(F)(F)C1OC(=O)C=C1                           | -6.19 | 0.65 | 1.92 | P | IN  |
| QL03143 | 2-(Heptafluoropropyl)-1,3-dioxolane                                      | 109799-66-8  | FC(F)(F)C(F)(F)C(F)(F)C1OCCO1                                | -5.85 | 0.64 | 1.83 | P | IN  |
| QL03144 | Allyl heptafluorobutryate                                                | 17165-55-8   | FC(F)(F)C(F)(F)C(F)(F)CC(=O)OC=C                             | -5.95 | 0.62 | 2.15 | P | OUT |
| QL03145 | 1,1,1,2,2,3,3,10,11,11,12,12,12-Tetradecafluoro-5,8-diiodododecane       | 2357-30-4    | FC(F)(F)C(F)(F)C(F)(F)CC(I)CC(I)CC(F)(F)C(F)(F)C(F)(F)F      | -7.74 | 0.65 | 2.65 | P | IN  |
| QL03146 | 1,1,1,2,2,3,3,11,11,12,12,13,13,13-Tetradecafluoro-5,9-diiodotridecane   | 1644-06-0    | FC(F)(F)C(F)(F)C(F)(F)C(I)CCCC(I)CC(F)(F)C(F)(F)C(F)(F)F     | -7.83 | 0.65 | 2.77 | P | IN  |
| QL03147 | Trichloro(3,3,4,4,5,5-heptafluoropentyl)silane                           | 866-24-0     | FC(F)(F)C(F)(F)C(F)(F)C(Si)(Cl)(Cl)Cl                        | -6.45 | 0.66 | 1.91 | P | IN  |
| QL03148 | 3,3,4,4,5,5-heptafluoropentanal                                          | 126015-32-5  | FC(F)(F)C(F)(F)C(F)(F)CC=O                                   | -5.71 | 0.64 | 1.85 | P | IN  |
| QL03149 | (2,2,3,3,4,4-Heptafluorobutyl)benzene                                    | 81664-99-5   | FC(F)(F)C(F)(F)C(F)(F)C1ccccc1                               | -6.04 | 0.63 | 2.13 | P | OUT |
| QL03150 | 1H,1H-Heptafluorobutyl epoxide                                           | 1765-92-0    | FC(F)(F)C(F)(F)C(F)(F)CC1CO1                                 | -6.22 | 0.66 | 1.84 | P | IN  |
| QL03151 | 2-(2,2,3,3,4,4-Heptafluorobutyl)-1,3-dioxolane                           | 175607-87-1  | FC(F)(F)C(F)(F)C(F)(F)CC1OCCO1                               | -5.85 | 0.64 | 1.92 | P | IN  |
| QL03152 | 5-Bromo-1,1,1,2,2,3,3-heptafluoropentane                                 | 355-94-2     | FC(F)(F)C(F)(F)C(F)(F)CCBr                                   | -5.71 | 0.64 | 1.85 | P | IN  |
| QL03153 | 1,1,1,2,2,3,3,4,4,5,5,6,6,9,9,10,10,11,11-1cosafuoroundecane             | 777931-73-4  | FC(F)(F)C(F)(F)C(F)(F)CCC(F)(F)C(F)(F)C(F)(F)C(F)(F)C(F)(F)F | -8.61 | 0.68 | 2.68 | P | IN  |



|         |                                                                                |              |                                                                                    |       |      |      |   |     |
|---------|--------------------------------------------------------------------------------|--------------|------------------------------------------------------------------------------------|-------|------|------|---|-----|
| QL03154 | 1,1,1,2,2,3,3,6,6,7,7,8,8-Tetradecafluorooctane                                | 1835251-92-7 | FC(F)(F)C(F)(F)C(F)(F)CCC(F)(F)C(F)(F)C(F)(F)F                                     | -7.41 | 0.68 | 2.16 | P | IN  |
| QL03155 | 7-Bromo-1,1,1,2,2,3,3-heptafluoroheptane                                       | 1391033-22-9 | FC(F)(F)C(F)(F)C(F)(F)CCCCBr                                                       | -5.83 | 0.62 | 2.17 | P | OUT |
| QL03156 | 1,1,1,2,2,3,3,10,10,11,11,12,12,12-Tetradecafluorododecane                     | 69125-82-2   | FC(F)(F)C(F)(F)C(F)(F)CCCCCCC(F)(F)C(F)(F)C(F)(F)F                                 | -7.53 | 0.65 | 2.60 | P | IN  |
| QL03157 | 1,1,1,2,2,3,3,12,12,13,13,14,14,14-Tetradecafluorotetradecane                  | 1835251-91-6 | FC(F)(F)C(F)(F)C(F)(F)CCCCCCCC(F)(F)C(F)(F)C(F)(F)F                                | -7.59 | 0.64 | 2.79 | P | OUT |
| QL03158 | 1,1,1,2,2,3,3,14,14,15,15,16,16,16-Tetradecafluorohexadecane                   | 168169-26-4  | FC(F)(F)C(F)(F)C(F)(F)CCCCCCCCC(F)(F)C(F)(F)C(F)(F)F                               | -7.67 | 0.63 | 2.96 | P | OUT |
| QL03159 | 1,1,1,2,2,3,3-Heptafluoro-7-iodoheptane                                        | 2967-60-4    | FC(F)(F)C(F)(F)C(F)(F)CCCCI                                                        | -5.83 | 0.62 | 2.17 | P | OUT |
| QL03160 | 1,1,1,2,2,3,3-Heptafluoro-5-iodopentane                                        | 68188-12-5   | FC(F)(F)C(F)(F)C(F)(F)CCI                                                          | -5.71 | 0.64 | 1.85 | P | IN  |
| QL03161 | 1,1,1,2,2,3,3-Heptafluoro-4-chlorobutane                                       | 374-97-0     | FC(F)(F)C(F)(F)C(F)(F)CCI                                                          | -5.48 | 0.66 | 1.46 | P | IN  |
| QL03162 | Heptafluorobutyl iodide                                                        | 374-98-1     | FC(F)(F)C(F)(F)C(F)(F)CI                                                           | -5.48 | 0.66 | 1.46 | P | IN  |
| QL03163 | 1-chloro-1,1,2,2,3,3,3-heptafluoropropane                                      | 422-86-6     | FC(F)(F)C(F)(F)C(F)(F)CI                                                           | -5.80 | 0.68 | 1.32 | P | IN  |
| QL03164 | N-Nitrosobis(2,2,3,3,4,4,4-heptafluorobutyl)amine                              | 83329-16-2   | FC(F)(F)C(F)(F)C(F)(F)CN(C(F)(F)C(F)(F)C(F)(F)F)N=O                                | -7.40 | 0.66 | 2.40 | P | IN  |
| QL03165 | Isocyanic acid, 2,2,3,3,4,4,4-heptafluorobutyl ester                           | 377-00-4     | FC(F)(F)C(F)(F)C(F)(F)CN=C=O                                                       | -5.63 | 0.63 | 1.95 | P | OUT |
| QL03166 | N-(2,2,3,3,4,4,4-Heptafluorobutyl)prop-2-enamide                               | 1422-65-7    | FC(F)(F)C(F)(F)C(F)(F)CNC(=O)C=C                                                   | -6.15 | 0.63 | 2.15 | P | OUT |
| QL03167 | 3-Benzamido-N-(2,2,3,3,4,4,4-heptafluorobutyl)benzamide                        | 917920-92-4  | FC(F)(F)C(F)(F)C(F)(F)CNC(=O)C1=CC(NC(=O)C2=CC=CC=C2)=CC=C1                        | -7.13 | 0.61 | 2.93 | P | OUT |
| QL03168 | N-(2,2,3,3,4,4,4-Heptafluorobutyl)benzamide                                    | 304458-19-3  | FC(F)(F)C(F)(F)C(F)(F)CNC(=O)c1ccccc1                                              | -6.47 | 0.62 | 2.42 | P | OUT |
| QL03169 | 2,2,3,3,4,4,4-Heptafluoro-N-(2,2,3,3,4,4,4-heptafluorobutyl)butan-1-amine      | 356-08-1     | FC(F)(F)C(F)(F)C(F)(F)CNC(C(F)(F)C(F)(F)C(F)(F)F                                   | -7.52 | 0.67 | 2.33 | P | IN  |
| QL03170 | Tris(1H,1H-heptafluorobutyl)phosphate                                          | 563-09-7     | FC(F)(F)C(F)(F)C(F)(F)CO[P](=O)(OCC(F)(F)C(F)(F)C(F)(F)F)OCC(F)(F)C(F)(F)C(F)(F)F  | -7.99 | 0.67 | 2.53 | P | IN  |
| QL03171 | Chlorotris(2,2,3,3,4,4,4-heptafluorobutoxy)silane                              | 757-72-2     | FC(F)(F)C(F)(F)C(F)(F)CO[Si](Cl)(OCC(F)(F)C(F)(F)C(F)(F)F)OCC(F)(F)C(F)(F)C(F)(F)F | -7.99 | 0.67 | 2.53 | P | IN  |
| QL03172 | tris((Perfluoropropyl)methyl) borate                                           | 755-53-3     | FC(F)(F)C(F)(F)C(F)(F)COB(OCC(F)(F)C(F)(F)C(F)(F)F)OCC(F)(F)C(F)(F)C(F)(F)F        | -7.79 | 0.67 | 2.51 | P | IN  |
| QL03173 | 2,2,3,3,4,4,4-Heptafluorobutyl 2-cyanoprop-2-enoate                            | 130192-28-8  | FC(F)(F)C(F)(F)C(F)(F)COC(=O)C(=C)C#N                                              | -6.28 | 0.63 | 2.21 | P | OUT |
| QL03174 | 2,2,3,3,4,4,4-Heptafluorobutyl 2-chloroprop-2-enoate                           | 74359-14-1   | FC(F)(F)C(F)(F)C(F)(F)COC(=O)C(Cl)=C                                               | -6.45 | 0.64 | 2.13 | P | IN  |
| QL03175 | 2,2,3,3,4,4,4-Heptafluorobutyl heptafluorobutanoate                            | 308-45-2     | FC(F)(F)C(F)(F)C(F)(F)COC(=O)C(F)(F)C(F)(F)C(F)(F)F                                | -7.66 | 0.67 | 2.36 | P | IN  |
| QL03176 | 1H,1H-Perfluorobutyl acrylate                                                  | 424-64-6     | FC(F)(F)C(F)(F)C(F)(F)COC(=O)C=C                                                   | -6.15 | 0.63 | 2.15 | P | OUT |
| QL03177 | Bis(1H,1H-perfluorobutyl)fumarate                                              | 24120-17-0   | FC(F)(F)C(F)(F)C(F)(F)COC(=O)C(=O)OCC(F)(F)C(F)(F)C(F)(F)F                         | -7.89 | 0.65 | 2.82 | P | IN  |
| QL03178 | 2,2,3,3,4,4,4-Heptafluorobutyl 1,2,3-benzothiadiazole-7-carboxylate            | 1384278-50-5 | FC(F)(F)C(F)(F)C(F)(F)COC(=O)c1cccc2nnscc12                                        | -6.47 | 0.63 | 2.38 | P | OUT |
| QL03179 | 2,2,3,3,4,4,4-Heptafluorobutyl but-3-enoate                                    | 17165-56-9   | FC(F)(F)C(F)(F)C(F)(F)COC(=O)CC=C                                                  | -5.98 | 0.62 | 2.23 | P | OUT |
| QL03180 | 1-Aziridinepropionic acid, 2,2,3,3,4,4,4-heptafluorobutyl ester                | 24160-20-1   | FC(F)(F)C(F)(F)C(F)(F)COC(=O)CCN1CC1                                               | -6.72 | 0.63 | 2.44 | P | OUT |
| QL03181 | Bis(2,2,3,3,4,4,4-heptafluorobutyl) carbonate                                  | 1026739-75-2 | FC(F)(F)C(F)(F)C(F)(F)COC(=O)OCC(F)(F)C(F)(F)C(F)(F)F                              | -7.75 | 0.66 | 2.57 | P | IN  |
| QL03182 | 2,2,3,3,4,4,4-Heptafluorobutyl carbonochloridate                               | 108156-21-4  | FC(F)(F)C(F)(F)C(F)(F)COC(Cl)=O                                                    | -6.00 | 0.64 | 1.93 | P | IN  |
| QL03183 | 4-(Ethenyloxy)-1,1,1,2,2,3,3-heptafluorobutane                                 | 356-00-3     | FC(F)(F)C(F)(F)C(F)(F)COC=C                                                        | -5.63 | 0.63 | 1.95 | P | OUT |
| QL03184 | 1-Ethenyl-4-(2,2,3,3,4,4,4-heptafluorobutoxy)benzene                           | 111144-99-1  | FC(F)(F)C(F)(F)C(F)(F)COC1=CC=C(C=C)C=C1                                           | -6.66 | 0.62 | 2.55 | P | OUT |
| QL03185 | 2-[[4-(Perfluorobutoxy)pyridin-2-yl]methanesulfinyl]-1H-thieno[3,4-d]imidazole | NOCAS_869668 | FC(F)(F)C(F)(F)C(F)(F)COC1=CC=NC(CS(=O)C2=NC3=CSC=C3N2)=C1                         | -7.39 | 0.62 | 2.94 | P | OUT |
| QL03186 | 4-(2,2,3,3,4,4,4-Heptafluorobutoxy)benzaldehyde                                | 943767-44-0  | FC(F)(F)C(F)(F)C(F)(F)COc1ccc(C=O)cc1                                              | -6.66 | 0.62 | 2.55 | P | OUT |
| QL03187 | 4-(2,2,3,3,4,4,4-Heptafluorobutoxy)benzonitrile                                | 96308-32-6   | FC(F)(F)C(F)(F)C(F)(F)COc1ccc(cc1)C#N                                              | -6.66 | 0.62 | 2.55 | P | OUT |
| QL03188 | 1,1,1,2,2,3,3-Heptafluoro-4-[2,2,3,3,4,4,4-heptafluorobutoxy]butane            | 647-91-6     | FC(F)(F)C(F)(F)C(F)(F)COCC(F)(F)C(F)(F)C(F)(F)F                                    | -7.52 | 0.67 | 2.33 | P | IN  |
| QL03189 | Allyl 1H,1H-heptafluorobutyl ether                                             | 648-42-0     | FC(F)(F)C(F)(F)C(F)(F)COCC=C                                                       | -5.83 | 0.62 | 2.17 | P | OUT |
| QL03190 | NSC221106                                                                      | 59727-25-2   | FC(F)(F)C(F)(F)C(F)(F)COCC1=CNC(=O)NC1=O                                           | -6.72 | 0.63 | 2.47 | P | OUT |
| QL03191 | 2-[(2,2,3,3,4,4,4-Heptafluorobutoxy)methyl]oxirane                             | 648-43-1     | FC(F)(F)C(F)(F)C(F)(F)COCC1CO1                                                     | -6.38 | 0.64 | 2.15 | P | IN  |
| QL03192 | 4-[(2,2,3,3,4,4,4-Heptafluorobutoxy)methyl]-1,3-dioxolan-2-one                 | 181044-06-4  | FC(F)(F)C(F)(F)C(F)(F)COCC1COC(=O)O1                                               | -6.59 | 0.63 | 2.39 | P | OUT |
| QL03193 | 4-(2-Chloroethoxy)-1,1,1,2,2,3,3-heptafluorobutane                             | 679-53-8     | FC(F)(F)C(F)(F)C(F)(F)COCCCl                                                       | -5.83 | 0.62 | 2.17 | P | OUT |



|         |                                                                                                                   |             |                                                                                                                                                                       |       |      |      |   |     |
|---------|-------------------------------------------------------------------------------------------------------------------|-------------|-----------------------------------------------------------------------------------------------------------------------------------------------------------------------|-------|------|------|---|-----|
| QL03194 | 2,2,3,3,4,4,4-Heptafluorobutyl diphenylphosphinate                                                                | 55776-72-2  | FC(F)(F)C(F)(F)C(F)(F)COP(=O)(c1ccccc1)c1ccccc1                                                                                                                       | -6.17 | 0.62 | 2.36 | P | OUT |
| QL03195 | Bis(2,2,3,3,4,4,4-heptafluorobutyl) phenylphosphonate                                                             | 31430-72-5  | FC(F)(F)C(F)(F)C(F)(F)COP(=O)(OCC(F)(F)C(F)(F)C(F)(F)F)c1ccccc1                                                                                                       | -7.66 | 0.65 | 2.67 | P | IN  |
| QL03196 | bis((Perfluoropropyl)methyl) phosphorochloridoate                                                                 | 6780-81-0   | FC(F)(F)C(F)(F)C(F)(F)COP(Cl)(=O)OCC(F)(F)C(F)(F)C(F)(F)F                                                                                                             | -8.02 | 0.67 | 2.59 | P | IN  |
| QL03197 | 1,3,5,2,4,6-Triazatriphosphorine, 2,2,4,4,6,6-hexakis(2,2,3,3,4,4,4-heptafluorobutoxy)-2,2,4,4,6,6-hexahydro-     | 470-73-5    | FC(F)(F)C(F)(F)C(F)(F)COP1(OCC(F)(F)C(F)(F)C(F)(F)F)=NP(OCC(F)(F)C(F)(F)C(F)(F)F)(OCC(F)(F)C(F)(F)C(F)(F)F)=NP(OCC(F)(F)C(F)(F)C(F)(F)F)(OCC(F)(F)C(F)(F)C(F)(F)F)=N1 | -8.09 | 0.67 | 2.57 | P | IN  |
| QL03198 | 1H,1H-Perfluorobutyl perfluorobutanesulfonate                                                                     | 883499-32-9 | FC(F)(F)C(F)(F)C(F)(F)COS(=O)(=O)C(F)(F)C(F)(F)C(F)(F)C(F)(F)F                                                                                                        | -8.22 | 0.68 | 2.50 | P | IN  |
| QL03199 | 1H,1H-Heptafluorobutyl triflate                                                                                   | 6401-01-0   | FC(F)(F)C(F)(F)C(F)(F)COS(=O)(=O)C(F)(F)F                                                                                                                             | -7.17 | 0.67 | 2.09 | P | IN  |
| QL03200 | {[(2,2,3,3,4,4,4-Heptafluorobutyl)sulfonyl]methyl}benzene                                                         | 200337-06-0 | FC(F)(F)C(F)(F)C(F)(F)CSCc1ccccc1                                                                                                                                     | -6.25 | 0.62 | 2.39 | P | OUT |
| QL03201 | Perflutren                                                                                                        | 76-19-7     | FC(F)(F)C(F)(F)C(F)(F)F                                                                                                                                               | -5.80 | 0.68 | 1.32 | P | IN  |
| QL03202 | Heptafluoropropyl iodide                                                                                          | 754-34-7    | FC(F)(F)C(F)(F)C(F)(F)I                                                                                                                                               | -5.80 | 0.68 | 1.32 | P | IN  |
| QL03203 | Perfluoro-N,N,N',N'-tetrakis(heptafluoropropyl)-1,6-hexanediamine                                                 | 143356-32-5 | FC(F)(F)C(F)(F)C(F)(F)N(C(F)(F)C(F)(F)C(F)(F)C(F)(F)C(F)(F)C(F)(F)C(F)(F)N(C(F)(F)C(F)(F)C(F)(F)C(F)(F)C(F)(F)F                                                       | -9.03 | 0.69 | 2.81 | P | OUT |
| QL03204 | Perfluamine                                                                                                       | 338-83-0    | FC(F)(F)C(F)(F)C(F)(F)N(C(F)(F)C(F)(F)C(F)(F)C(F)(F)C(F)(F)C(F)(F)C(F)(F)F                                                                                            | -7.41 | 0.69 | 2.04 | P | IN  |
| QL03205 | 1,1,1,2,4,5,5-Octafluoro-2-(heptafluoropropoxy)-4-(trifluoromethyl)pentan-3-one                                   | 851535-00-7 | FC(F)(F)C(F)(F)C(F)(F)OC(F)(C(=O)C(F)(C(F)(F)C(F)(F)C(F)(F)F                                                                                                          | -7.46 | 0.68 | 2.17 | P | IN  |
| QL03206 | 1,5-Dideoxy-1,1,1,5,5,5-hexafluoro-2,4-di-C-fluoro-2,4-bis-O-(heptafluoropropyl)pent-3-ulose                      | 67118-49-4  | FC(F)(F)C(F)(F)C(F)(F)OC(F)(C(=O)C(F)(OC(F)(F)C(F)(F)C(F)(F)C(F)(F)C(F)(F)F                                                                                           | -8.42 | 0.68 | 2.65 | P | IN  |
| QL03207 | 1,1,1,2,6,7,7-Octafluoro-2,6-bis(heptafluoropropoxy)heptane-3,5-dione                                             | 87405-74-1  | FC(F)(F)C(F)(F)C(F)(F)OC(F)(C(=O)CC(=O)C(F)(OC(F)(F)C(F)(F)C(F)(F)C(F)(F)C(F)(F)F                                                                                     | -8.61 | 0.67 | 2.82 | P | IN  |
| QL03208 | 2,3,3,3-Tetrafluoro-2-(heptafluoropropoxy)-1-(piperidin-1-yl)propan-1-one                                         | 176702-72-0 | FC(F)(F)C(F)(F)C(F)(F)OC(F)(C(=O)N1CCCCC1)C(F)(F)F                                                                                                                    | -7.10 | 0.64 | 2.45 | P | IN  |
| QL03209 | 2,3,3,3-Tetrafluoro-2-(heptafluoropropoxy)-1-(morpholin-4-yl)propan-1-one                                         | 176702-73-1 | FC(F)(F)C(F)(F)C(F)(F)OC(F)(C(=O)N1CCOCC1)C(F)(F)F                                                                                                                    | -7.10 | 0.64 | 2.45 | P | IN  |
| QL03210 | N-Benzyl-2,3,3,3-tetrafluoro-2-(heptafluoropropoxy)propanamide                                                    | 82970-41-0  | FC(F)(F)C(F)(F)C(F)(F)OC(F)(C(=O)NCc1ccccc1)C(F)(F)F                                                                                                                  | -7.36 | 0.64 | 2.70 | P | OUT |
| QL03211 | Cyclohexyl 2,3,3,3-tetrafluoro-2-(heptafluoropropoxy)propanoate                                                   | 78755-41-6  | FC(F)(F)C(F)(F)C(F)(F)OC(F)(C(=O)OC1CCCCC1)C(F)(F)F                                                                                                                   | -7.14 | 0.64 | 2.53 | P | IN  |
| QL03212 | Phenyl 2,3,3,3-tetrafluoro-2-(heptafluoropropoxy)propanoate                                                       | 78755-31-4  | FC(F)(F)C(F)(F)C(F)(F)OC(F)(C(=O)Oc1ccccc1)C(F)(F)F                                                                                                                   | -7.14 | 0.64 | 2.53 | P | IN  |
| QL03213 | Prop-2-en-1-yl 2,3,3,3-tetrafluoro-2-(heptafluoropropoxy)propanoate                                               | 84123-65-9  | FC(F)(F)C(F)(F)C(F)(F)OC(F)(C(=O)OCC=C)C(F)(F)F                                                                                                                       | -6.99 | 0.64 | 2.46 | P | IN  |
| QL03214 | Benzyl 2,3,3,3-tetrafluoro-2-(heptafluoropropoxy)propanoate                                                       | 147224-19-9 | FC(F)(F)C(F)(F)C(F)(F)OC(F)(C(=O)OCC1CCCCC1)C(F)(F)F                                                                                                                  | -7.36 | 0.64 | 2.70 | P | OUT |
| QL03215 | bis(2,3,3,3-tetrafluoro-2-(heptafluoropropoxy)-1-oxopropyl)peroxide                                               | 56347-79-6  | FC(F)(F)C(F)(F)C(F)(F)OC(F)(C(=O)OOC(=O)C(F)(OC(F)(F)C(F)(F)C(F)(F)C(F)(F)C(F)(F)F                                                                                    | -8.60 | 0.67 | 2.87 | P | IN  |
| QL03216 | 2,3,3,3-Tetrafluoro-2-(heptafluoropropoxy)propanoyl chloride                                                      | 72848-57-8  | FC(F)(F)C(F)(F)C(F)(F)OC(F)(C(Cl)=O)C(F)(F)F                                                                                                                          | -6.59 | 0.67 | 1.85 | P | IN  |
| QL03217 | Tris(4-[1,1,2,3,3,3-hexafluoro-2-(heptafluoropropoxy)propyl]phenyl)phosphane                                      | 62512-90-7  | FC(F)(F)C(F)(F)C(F)(F)OC(F)(C(F)(F)C(F)(F)C(F)(F)C1=CC=C(C=C1)P(C1=CC=C(C=C1)C(F)(F)C(F)(OC(F)(F)C(F)(F)C(F)(F)C(F)(F)C1=CC=C(C=C1)C(F)(F)C(F)(F)C(F)(F)C(F)(F)F      | -9.42 | 0.66 | 3.38 | P | OUT |
| QL03218 | 1-[(1-(1,2-Dibromo-1,2,2-trifluoroethoxy)-1,1,2,3,3,3-hexafluoropropan-2-yl)oxy]-1,1,2,2,3,3,3-heptafluoropropane | 115783-72-7 | FC(F)(F)C(F)(F)C(F)(F)OC(F)(C(F)(F)C(F)(F)C(F)(F)OC(F)(Br)C(F)(F)Br                                                                                                   | -8.00 | 0.68 | 2.43 | P | IN  |
| QL03219 | 1-(4-Bromophenyl)-2,3,3,3-tetrafluoro-2-[1,1,2,3,3,3-hexafluoro-2-(heptafluoropropoxy)propoxy]propan-1-one        | 67727-74-6  | FC(F)(F)C(F)(F)C(F)(F)OC(F)(C(F)(F)C(F)(F)C(F)(F)OC(F)(C(=O)C1=CC=C(Br)C=C1)C(F)(F)F                                                                                  | -8.19 | 0.66 | 2.82 | P | IN  |
| QL03220 | 2,3,3,3-Tetrafluoro-2-[1,1,2,3,3,3-hexafluoro-2-(heptafluoropropoxy)propoxy]-1-(piperidin-1-yl)propan-1-one       | 176702-75-3 | FC(F)(F)C(F)(F)C(F)(F)OC(F)(C(F)(F)C(F)(F)C(F)(F)OC(F)(C(=O)N1CCCCC1)C(F)(F)F                                                                                         | -7.86 | 0.66 | 2.69 | P | IN  |
| QL03221 | 2,3,3,3-Tetrafluoro-2-[1,1,2,3,3,3-hexafluoro-2-(heptafluoropropoxy)propoxy]-1-(morpholin-4-yl)propan-1-one       | 176702-76-4 | FC(F)(F)C(F)(F)C(F)(F)OC(F)(C(F)(F)C(F)(F)C(F)(F)OC(F)(C(=O)N1CCOCC1)C(F)(F)F                                                                                         | -7.86 | 0.66 | 2.69 | P | IN  |
| QL03222 | N-2-Pyridinylperfluoro-2-(2-propoxypropoxy)propanamide                                                            | 31339-60-3  | FC(F)(F)C(F)(F)C(F)(F)OC(F)(C(F)(F)C(F)(F)OC(F)(C(=O)NC1=CC=CC=N1)C(F)(F)F                                                                                            | -8.03 | 0.65 | 2.83 | P | IN  |
| QL03223 | N-2-Pyrimidinylperfluoro-2-(2-propoxypropoxy)propanamide                                                          | 340131-92-2 | FC(F)(F)C(F)(F)C(F)(F)OC(F)(C(F)(F)C(F)(F)OC(F)(C(=O)NC1=CC=CC=N1)C(F)(F)F                                                                                            | -8.03 | 0.65 | 2.83 | P | IN  |

[illegible]

|         |                                                                                                                              |              |                                                                                                     |
|---------|------------------------------------------------------------------------------------------------------------------------------|--------------|-----------------------------------------------------------------------------------------------------|
| QL03254 | Perfluoro-5-(pentafluoroethyl)oxolane                                                                                        | NOCAS_870516 | FC(F)(F)C(F)(F)C1(F)OC(F)(F)C(F)(F)C1(F)F                                                           |
| QL03255 | 2-(1,1,1,2,3,3,3-Heptafluoropropan-2-yl)-2-(pentafluoroethyl)-3,3-bis(trifluoromethyl)oxirane                                | 103697-21-8  | FC(F)(F)C(F)(F)C1(OC1C(F)(F)C(F)(F)C(F)(F)C(F)(F)C(F)(F)F                                           |
| QL03256 | 2,4,6-Tris(pentafluoroethyl)-1,3,5-triazine                                                                                  | 858-46-8     | FC(F)(F)C(F)(F)C1=NC(=NC(=N1)C(F)(F)C(F)(F)C(F)(F)C(F)(F)F                                          |
| QL03257 | 1,1,1,2,2,3,3,4,4,5,5,6,6,7,7,8,8,11,11,12,12,12-Docosafuoro-9-iodododecane                                                  | 641617-25-6  | FC(F)(F)C(F)(F)CC(I)C(F)(F)C(F)(F)C(F)(F)C(F)(F)C(F)(F)C(F)(F)C(F)(F)F                              |
| QL03258 | 1,1,1,2,2,3,3,4,4,7,7,8,8,8-Tetradecafluoro-5-iodooctane                                                                     | 935553-89-2  | FC(F)(F)C(F)(F)CC(I)C(F)(F)C(F)(F)C(F)(F)C(F)(F)F                                                   |
| QL03259 | Bis(3-(perfluoroethyl)-1-(9-bromononyl)propyl) thioether                                                                     | 148757-89-5  | FC(F)(F)C(F)(F)CCC(CCCCCCCCBr)SC(CCCCCCCCBr)CCC(F)(F)C(F)(F)F                                       |
| QL03260 | 1,1,1,2,2,3,3,4,4,7,7,8,8,8-Tetradecafluorooctane                                                                            | 343627-66-7  | FC(F)(F)C(F)(F)CCC(F)(F)C(F)(F)C(F)(F)C(F)(F)F                                                      |
| QL03261 | 22 Fluorotelomer iodide<br>Thiols, C4-10, .gamma.-.omega.-perfluoro-                                                         | 40723-80-6   | FC(F)(F)C(F)(F)CCI                                                                                  |
| QL03262 | (Perfluoroalkyl (C2-C8)ethyl mercaptan)                                                                                      | 68140-18-1   | FC(F)(F)C(F)(F)CCS                                                                                  |
| QL03263 | (Perfluoroethyl)methyl iodide                                                                                                | 354-69-8     | FC(F)(F)C(F)(F)CI                                                                                   |
| QL03264 | 1H,1H-Perfluoropropyl acrylate<br>2,2,3,3,3-Pentafluoropropyl nonafluorobutane-1-sulfonate                                   | 356-86-5     | FC(F)(F)C(F)(F)COC(=O)C=C                                                                           |
| QL03265 | Perfluoroethane                                                                                                              | 76-16-4      | FC(F)(F)C(F)(F)C(F)(F)C(F)(F)C(F)(F)F                                                               |
| QL03266 | Perfluoroiodoethane                                                                                                          | 354-64-3     | FC(F)(F)C(F)(F)I                                                                                    |
| QL03267 | Perfluorotriethylamine                                                                                                       | 359-70-6     | FC(F)(F)C(F)(F)N(C(F)(F)C(F)(F)C(F)(F)C(F)(F)F                                                      |
| QL03268 | Morpholine, 2,2,3,3,5,5,6,6-octafluoro-4-(pentafluoroethyl)-                                                                 | 55716-11-5   | FC(F)(F)C(F)(F)N1C(F)(F)C(F)(F)OC(F)(F)C1(F)F                                                       |
| QL03270 | 1,1,1,2,2,3,3,4,5,5,5-Undecafluoro-4-(pentafluoroethoxy)pentane                                                              | 92978-07-9   | FC(F)(F)C(F)(F)OC(F)(F)C(F)(F)C(F)(F)C(F)(F)C(F)(F)F                                                |
| QL03271 | Hexane, 1,1,2,2,3,3,4,4,5,5,6,6,6-tridecafluoro-1-(pentafluoroethoxy)-                                                       | 133080-89-4  | FC(F)(F)C(F)(F)OC(F)(F)C(F)(F)C(F)(F)C(F)(F)C(F)(F)C(F)(F)F                                         |
| QL03272 | POLYFLGSID_880513                                                                                                            | 60164-51-4   | FC(F)(F)C(F)(F)OC(F)(F)C(F)(F)C(F)(F)F                                                              |
| QL03273 | alpha-Perfluoropropyl omega-perfluoroethyl poly(perfluoropropylene oxide)                                                    | 52700-35-3   | FC(F)(F)C(F)(F)OC(F)(F)C(F)(F)C(F)(F)OC(F)(F)C(F)(F)C(F)(F)F                                        |
| QL03274 | Perfluoroethyl ether                                                                                                         | 358-21-4     | FC(F)(F)C(F)(F)OC(F)(F)C(F)(F)F                                                                     |
| QL03275 | multiple ether-substituted Perfluoroalkyl (linear) sulfonic acids, n=8                                                       |              | FC(F)(F)C(F)(F)OC(F)(F)C(F)(F)OC(F)(F)C(F)(F)C(F)(F)C(F)(F)C(F)(F)C(F)(F)C(F)(F)S(=O)(O)=O          |
| QL03276 | multiple ether-substituted Perfluoroalkyl (linear) sulfonic acids, n=7                                                       |              | FC(F)(F)C(F)(F)OC(F)(F)C(F)(F)OC(F)(F)C(F)(F)C(F)(F)C(F)(F)C(F)(F)C(F)(F)S(=O)(O)=O                 |
| QL03277 | multiple ether-substituted Perfluoroalkyl (linear) sulfonic acids, n=6                                                       |              | FC(F)(F)C(F)(F)OC(F)(F)C(F)(F)OC(F)(F)C(F)(F)C(F)(F)C(F)(F)C(F)(F)S(=O)(O)=O                        |
| QL03278 | multiple ether-substituted Perfluoroalkyl (linear) sulfonic acids, n=5                                                       |              | FC(F)(F)C(F)(F)OC(F)(F)C(F)(F)OC(F)(F)C(F)(F)C(F)(F)C(F)(F)S(=O)(O)=O                               |
| QL03279 | multiple ether-substituted Perfluoroalkyl (linear) sulfonic acids, n=4                                                       |              | FC(F)(F)C(F)(F)OC(F)(F)C(F)(F)OC(F)(F)C(F)(F)C(F)(F)S(=O)(O)=O                                      |
| QL03280 | multiple ether-substituted Perfluoroalkyl (linear) sulfonic acids, n=3                                                       |              | FC(F)(F)C(F)(F)OC(F)(F)C(F)(F)OC(F)(F)C(F)(F)S(=O)(O)=O                                             |
| QL03281 | multiple ether-substituted Perfluoroalkyl (linear) sulfonic acids, n=2                                                       |              | FC(F)(F)C(F)(F)OC(F)(F)C(F)(F)OC(F)(F)S(=O)(O)=O                                                    |
| QL03282 | 1,1,2,2-Tetrafluoro-2-(pentafluoroethoxy)ethane-1-sulfonyl fluoride                                                          | 67990-78-7   | FC(F)(F)C(F)(F)OC(F)(F)C(F)(F)S(F)(=O)=O                                                            |
| QL03283 | 2-(2-Bromo-1,1,2,2-tetrafluoroethoxy)-1,1,1,2,3,3-hexafluoro-3-(pentafluoroethoxy)propane                                    | 1482416-44-3 | FC(F)(F)C(F)(F)OC(F)(F)C(F)(F)OC(F)(F)C(F)(F)BrC(F)(F)F                                             |
| QL03284 | 1,1,1,2,3,3-Hexafluoro-2,3-bis(pentafluoroethoxy)propane                                                                     | 95842-03-8   | FC(F)(F)C(F)(F)OC(F)(F)C(F)(F)OC(F)(F)C(F)(F)C(F)(F)F                                               |
| QL03285 | 1,1,2,2-Tetrafluoro-2-([1,1,1,2,3,3-hexafluoro-3-(pentafluoroethoxy)propan-2-yl]oxy)ethane-1-sulfonyl fluoride               | 27744-59-8   | FC(F)(F)C(F)(F)OC(F)(F)C(F)(F)OC(F)(F)C(F)(F)S(F)(=O)=O)C(F)(F)F                                    |
| QL03286 | 1-Bromo-1,1,2,2,4,5,5,7,8,8,10,11,11,13,13,14,14,14-octadecafluoro-4,7,10-tris(trifluoromethyl)-3,6,9,12-tetraoxatetradecane | 1482416-51-2 | FC(F)(F)C(F)(F)OC(F)(F)C(F)(F)OC(F)(F)C(F)(F)OC(F)(F)C(F)(F)OC(F)(F)BrC(F)(F)C(F)(F)C(F)(F)C(F)(F)F |

|       |      |      |   |     |
|-------|------|------|---|-----|
| -6.99 | 0.69 | 1.76 | P | IN  |
| -6.42 | 0.68 | 1.57 | P | IN  |
| -6.68 | 0.67 | 1.89 | P | IN  |
| -8.76 | 0.68 | 2.74 | P | IN  |
| -7.55 | 0.68 | 2.24 | P | IN  |
| -6.75 | 0.57 | 3.31 | P | OUT |
| -7.55 | 0.68 | 2.23 | P | IN  |
| -4.54 | 0.62 | 1.52 | P | OUT |
| -4.54 | 0.62 | 1.52 | P | OUT |
| -4.95 | 0.64 | 1.39 | P | IN  |
| -5.20 | 0.62 | 1.88 | P | OUT |
| -8.04 | 0.68 | 2.44 | P | IN  |
| -4.57 | 0.67 | 0.81 | P | OUT |
| -4.57 | 0.67 | 0.81 | P | OUT |
| -6.49 | 0.68 | 1.65 | P | IN  |
| -6.61 | 0.68 | 1.66 | P | IN  |
| -7.52 | 0.68 | 2.14 | P | IN  |
| -8.19 | 0.69 | 2.44 | P | IN  |
| -6.92 | 0.68 | 1.89 | P | IN  |
| -8.18 | 0.68 | 2.50 | P | IN  |
| -6.44 | 0.67 | 1.71 | P | IN  |
| -9.47 | 0.69 | 3.06 | P | OUT |
| -9.18 | 0.69 | 2.93 | P | OUT |
| -9.06 | 0.69 | 2.88 | P | OUT |
| -8.73 | 0.68 | 2.73 | P | IN  |
| -8.48 | 0.68 | 2.63 | P | IN  |
| -8.18 | 0.68 | 2.50 | P | IN  |
| -8.00 | 0.68 | 2.44 | P | IN  |
| -6.92 | 0.68 | 1.89 | P | IN  |
| -7.56 | 0.68 | 2.24 | P | IN  |
| -7.56 | 0.68 | 2.24 | P | IN  |
| -8.00 | 0.68 | 2.43 | P | IN  |
| -8.95 | 0.68 | 2.92 | P | OUT |



|         |                                                                                                                                                                                                    |                       |                                                                                |
|---------|----------------------------------------------------------------------------------------------------------------------------------------------------------------------------------------------------|-----------------------|--------------------------------------------------------------------------------|
| QL03320 | 1,1,1,2,2,3,3,4,4,7,7,7-Dodecafluoro-6-iodoheptane                                                                                                                                                 | 935553-88-1           | FC(F)(F)C(I)CC(F)(F)C(F)(F)C(F)(F)F                                            |
| QL03321 | 1,1,1,3,3,3-Hexafluoropropan-2-yl heptafluorobutanoate                                                                                                                                             | 922168-41-0           | FC(F)(F)C(OC(=O)C(F)(F)C(F)(F)C(F)(F)F                                         |
| QL03322 | Hexafluoroisopropyl acrylate                                                                                                                                                                       | 2160-89-6             | FC(F)(F)C(OC(=O)C=C)C(F)(F)F                                                   |
| QL03323 | 1,1,1,3,3,3-Hexafluoropropan-2-yl nonafluorobutane-1-sulfonate                                                                                                                                     | 118334-96-6           | FC(F)(F)C(OS(=O)(=O)C(F)(F)C(F)(F)C(F)(F)C(F)(F)F                              |
| QL03324 | H-substituted perfluoroalkyl (linear) sulfonic acids_ii, n=0                                                                                                                                       |                       | FC(F)(F)C(S(=O)(O)=O)(F)[H]                                                    |
| QL03325 | 1,1,1,4,4,5,5,6,6,7,7,8,8,9,9-Hexadecafluoronon-2-ene                                                                                                                                              | 935477-01-3           | FC(F)(F)C=CC(F)(F)C(F)(F)C(F)(F)C(F)(F)C(F)(F)F                                |
| QL03326 | 1,1,1,4,4,5,5,6,6,7,7,8,8-Tetradecafluoroct-2-ene                                                                                                                                                  | 935476-95-2           | FC(F)(F)C=CC(F)(F)C(F)(F)C(F)(F)C(F)(F)F                                       |
| QL03327 | 1,1,1,4,4,5,5,6,6,7,7,7-Dodecafluorohept-2-ene                                                                                                                                                     | 887111-62-8           | FC(F)(F)C=CC(F)(F)C(F)(F)C(F)(F)C(F)(F)F                                       |
| QL03328 | (2E)-1,1,1,4,4,5,5,6,6-Decafluorohex-2-ene                                                                                                                                                         | 83227-62-7            | FC(F)(F)C=CC(F)(F)C(F)(F)C(F)(F)F                                              |
| QL03329 | Cyclohexane, decafluorobis(trifluoromethyl)- (6Cl,7Cl,8Cl,9Cl)                                                                                                                                     | 26637-68-3            | FC(F)(F)C1(C(F)(F)F)C(F)(F)C(F)(F)C(F)(F)C1(F)F                                |
| QL03330 | Perfluorodimethylcyclobutane                                                                                                                                                                       | 28677-00-1            | FC(F)(F)C1(C(F)(F)F)C(F)(F)C(F)(F)C1(F)F                                       |
| QL03331 | Perfluoro-1,3,5-trimethylcyclohexane                                                                                                                                                               | 374-76-5              | FC(F)(F)C1(F)C(F)(F)C(F)(F)C(F)(F)C(F)(F)C1(F)F                                |
| QL03332 | Cyclobutane, 1,1,2,3,3,4-hexafluoro-2,4-bis(trifluoromethyl)-                                                                                                                                      | 13221-71-1            | FC(F)(F)C1(F)C(F)(F)C(F)(F)C1(F)F                                              |
| QL03333 | 1,1,2,2,3,4,4,5,5,6-Decafluoro-3,6-bis(trifluoromethyl)cyclohexane                                                                                                                                 | 374-77-6              | FC(F)(F)C1(F)C(F)(F)C(F)(F)C(F)(F)C(F)(F)C1(F)F                                |
| QL03334 | Perfluoro-1,3-dimethylcyclohexane                                                                                                                                                                  | 335-27-3              | FC(F)(F)C1(F)C(F)(F)C(F)(F)C(F)(F)C1(F)F                                       |
| QL03335 | Perfluoro-5,5'-bis(trifluoromethyl)-1,1'-bicyclohexyl                                                                                                                                              | 105462-77-9           | FC(F)(F)C1(F)C(F)(F)C(F)(F)C(F)(F)C1(F)C1(F)C(F)(F)C(F)(F)C(F)(F)C(F)(F)C1(F)F |
| QL03336 | Perfluoro-1,2-dimethylcyclohexane                                                                                                                                                                  | 306-98-9              | FC(F)(F)C1(F)C(F)(F)C(F)(F)C(F)(F)C1(F)C(F)(F)F                                |
| QL03337 | Perfluoromethylcyclohexane                                                                                                                                                                         | 355-02-2              | FC(F)(F)C1(F)C(F)(F)C(F)(F)C(F)(F)C(F)(F)C1(F)F                                |
| QL03338 | Cyclohexanesulfonyl fluoride, decafluoro(trifluoromethyl)-                                                                                                                                         | 68318-34-3            | FC(F)(F)C1(F)C(F)(F)C(F)(F)C(F)(F)C1(F)S(F)(=O)=O                              |
| QL03339 | Perfluoromethylcyclopentane                                                                                                                                                                        | 1805-22-7             | FC(F)(F)C1(F)C(F)(F)C(F)(F)C(F)(F)C1(F)F                                       |
| QL03340 | Perfluoromethyldecalin                                                                                                                                                                             | 51294-16-7            | FC(F)(F)C1(F)C(F)(F)C(F)(F)C2(F)C(F)(F)C(F)(F)C(F)(F)C12F                      |
| QL03341 | Perfluoro-1,2-dimethylcyclobutane                                                                                                                                                                  | 2994-71-0             | FC(F)(F)C1(F)C(F)(F)C(F)(F)C1(F)C(F)(F)F                                       |
| QL03342 | Perfluoro-2-methyldecalin                                                                                                                                                                          | 306-95-6              | FC(F)(F)C1(F)C(F)(F)C(F)(F)C2(F)C(F)(F)C(F)(F)C(F)(F)C2(F)C1(F)F               |
| QL03343 | Perfluoro-3,6-dimethyl-1,4-dioxan-2-one                                                                                                                                                            | 7309-84-4             | FC(F)(F)C1(F)OC(C(F)(F)C(F)(OC1=O)C(F)(F)F                                     |
| QL03344 | Perfluoromethyloxirane                                                                                                                                                                             | 428-59-1              | FC(F)(F)C1(F)OC1(F)F                                                           |
| QL03345 | Perfluoroalkyl N-heterocycles, m+n+p=6                                                                                                                                                             |                       | FC(F)(F)C1=C(OC(F)(F)F)N=C(C(F)(F)C(F)(F)C(F)(F)F)[N]-1                        |
| QL03346 | 2,2,3,3,4,4,5,5,6,6,7,7,8,8,9,9-Heptadecafluoro-N-[3-(trifluoromethyl)phenyl]nonanamide                                                                                                            | 325989-96-6           | FC(F)(F)c1cccc(NC(=O)C(F)(F)C(F)(F)C(F)(F)C(F)(F)C(F)(F)C(F)(F)C(F)(F)F)c1     |
| QL03347 | 2,2,3,3,4,4-Heptafluoro-N-[3-(trifluoromethyl)phenyl]butanamide                                                                                                                                    | 2059-15-6             | FC(F)(F)c1cccc(NC(=O)C(F)(F)C(F)(F)C(F)(F)F)c1                                 |
| QL03348 | Dichlorobis(1,1,2,2,3,3,6,6-nonafluorohexyl)silane                                                                                                                                                 | 156323-66-9           | FC(F)(F)CCC(F)(F)C(F)(F)C(F)(F)[Si](Cl)(Cl)C(F)(F)C(F)(F)C(F)(F)CCC(F)(F)F     |
| QL03349 | Trichloro(1,1,2,2,3,3,6,6-nonafluorohexyl)silane                                                                                                                                                   | 78560-47-1            | FC(F)(F)CCC(F)(F)C(F)(F)C(F)(F)[Si](Cl)(Cl)Cl                                  |
| QL03350 | 1-Bromo-4-(1,1,2,2,3,3,4,4,5,5,6,6,7,7,10,10,10-heptadecafluorodecyl)benzene                                                                                                                       | 195324-88-0           | FC(F)(F)CCC(F)(F)C(F)(F)C(F)(F)C(F)(F)C(F)(F)C(F)(F)C1=CC=C(Br)C=C1            |
| QL03351 | 1,1,1,2,2,3,3,4,4,7,7,7-Dodecafluoroheptane                                                                                                                                                        | 503189-11-5           | FC(F)(F)CCC(F)(F)C(F)(F)C(F)(F)C(F)(F)F                                        |
| QL03352 | 1,1,1,2,2,3,3,6,6-Decafluorohexane                                                                                                                                                                 | 188189-52-8           | FC(F)(F)CCC(F)(F)C(F)(F)C(F)(F)F                                               |
| QL03353 | Poly(difluoromethylene), .alpha.-[2-{[2-carboxyethyl]thio}ethyl]-.omega.-fluoro-, lithium salt (11)  Poly(difluoromethylene), .alpha.-[2-{[2-carboxyethyl]thio}ethyl]-.omega.-fluoro- (Zonyl 7950) | 65530-69-0 65530-83-8 | FC(F)(F)CCSCCC(O)=O                                                            |
| QL03354 | 2,2,2-trifluoroethyl perfluorobutanimidate                                                                                                                                                         | 4078-29-9             | FC(F)(F)COC(=N)C(F)(F)C(F)(F)C(F)(F)F                                          |
| QL03355 | 2,2,2-Trifluoroethyl 4,4,5,5,6,6,7,7,8,8,9,10,10,11,11-heptadecafluoroundecanoate                                                                                                                  | 344580-04-7           | FC(F)(F)COC(=O)CCC(F)(F)C(F)(F)C(F)(F)C(F)(F)C(F)(F)C(F)(F)C(F)(F)F            |
| QL03356 | 2,2,3,3,4,4,5,5-Nonafluoro-1-phenylpentyl bis(2,2,2-trifluoroethyl) phosphate                                                                                                                      | 100664-15-1           | FC(F)(F)COP(=O)(OC(F)(F)F)OC(c1ccccc1)C(F)(F)C(F)(F)C(F)(F)C(F)(F)F            |
| QL03357 | 2,2,2-Trifluoroethyl perfluorobutanesulfonate                                                                                                                                                      | 79963-95-4            | FC(F)(F)COS(=O)(=O)C(F)(F)C(F)(F)C(F)(F)F                                      |
| QL03358 | Perfluoro(N-methylmorpholine)                                                                                                                                                                      | 382-28-5              | FC(F)(F)N1C(F)(F)C(F)(F)OC(F)(F)C1(F)F                                         |
| QL03359 | 1,1,1,3,3,3-Hexafluoro-2-(trifluoromethoxy)-2-(trifluoromethyl)propane                                                                                                                             | 681-08-3              | FC(F)(F)OC(C(F)(F)F)(C(F)(F)F)C(F)(F)F                                         |

|       |      |      |   |     |
|-------|------|------|---|-----|
| -7.25 | 0.67 | 2.17 | P | IN  |
| -6.85 | 0.66 | 2.06 | P | IN  |
| -4.76 | 0.61 | 1.69 | P | OUT |
| -7.40 | 0.68 | 2.18 | P | IN  |
| -4.98 | 0.65 | 1.30 | P | IN  |
| -7.90 | 0.67 | 2.44 | P | IN  |
| -7.39 | 0.67 | 2.23 | P | IN  |
| -7.14 | 0.67 | 2.17 | P | IN  |
| -6.45 | 0.66 | 1.91 | P | IN  |
| -6.56 | 0.69 | 1.52 | P | IN  |
| -6.42 | 0.69 | 1.48 | P | IN  |
| -6.22 | 0.69 | 1.35 | P | IN  |
| -7.28 | 0.69 | 1.89 | P | IN  |
| -7.33 | 0.69 | 1.89 | P | IN  |
| -6.54 | 0.69 | 1.48 | P | IN  |
| -7.97 | 0.70 | 2.15 | P | IN  |
| -6.54 | 0.69 | 1.48 | P | IN  |
| -6.60 | 0.70 | 1.47 | P | IN  |
| -6.54 | 0.69 | 1.48 | P | IN  |
| -6.60 | 0.70 | 1.48 | P | IN  |
| -7.30 | 0.70 | 1.77 | P | IN  |
| -6.22 | 0.69 | 1.35 | P | IN  |
| -7.85 | 0.70 | 2.06 | P | IN  |
| -6.96 | 0.67 | 1.98 | P | IN  |
| -5.97 | 0.68 | 1.36 | P | IN  |
| -6.96 | 0.66 | 2.17 | P | IN  |
| -8.65 | 0.67 | 2.95 | P | IN  |
| -6.98 | 0.64 | 2.40 | P | IN  |
| -8.44 | 0.67 | 2.80 | P | IN  |
| -7.14 | 0.67 | 2.17 | P | IN  |
| -8.35 | 0.66 | 2.88 | P | IN  |
| -7.14 | 0.67 | 2.17 | P | IN  |
| -6.45 | 0.66 | 1.91 | P | IN  |
| -4.29 | 0.57 | 2.12 | P | OUT |
| -6.80 | 0.65 | 2.16 | P | IN  |
| -8.65 | 0.67 | 2.94 | P | IN  |
| -6.87 | 0.64 | 2.43 | P | IN  |
| -7.39 | 0.67 | 2.23 | P | IN  |
| -5.42 | 0.68 | 1.13 | P | IN  |
| -5.22 | 0.66 | 1.22 | P | IN  |

|         |                                                                                                                       |             |                                                                                              |       |      |      |   |     |
|---------|-----------------------------------------------------------------------------------------------------------------------|-------------|----------------------------------------------------------------------------------------------|-------|------|------|---|-----|
| QL03360 | ether-substituted perfluoroalkyl (linear) caborxylic acids_i, n=1                                                     |             | FC(F)(F)OC(F)(C(F)(F)C(O)=O                                                                  | -5.07 | 0.65 | 1.38 | P | IN  |
| QL03361 | 3,4,4,4-Tetrafluoro-3-(trifluoromethoxy)-1-butene                                                                     | 226575-14-0 | FC(F)(F)OC(F)(C=C)C(F)(F)F                                                                   | -4.87 | 0.64 | 1.42 | P | IN  |
| QL03362 | [2,3,3,3-Tetrafluoro-2-(trifluoromethoxy)propyl]oxirane                                                               | 243139-60-8 | FC(F)(F)OC(F)(CC1CO1)C(F)(F)F                                                                | -5.74 | 0.64 | 1.83 | P | IN  |
| QL03363 | 1,2-Dibromo-1,1,2,3,3-pentafluoro-3-(trifluoromethoxy)propane                                                         | 885275-98-9 | FC(F)(F)OC(F)(F)C(F)(Br)C(F)(F)Br                                                            | -6.40 | 0.67 | 1.81 | P | IN  |
| QL03364 | Perfluoro-3-methoxypropanoic anhydride                                                                                | 42566-65-4  | FC(F)(F)OC(F)(F)C(F)(F)C(=O)OC(=O)C(F)(F)C(F)(F)OC(F)(F)F                                    | -7.61 | 0.65 | 2.59 | P | IN  |
| QL03365 | ether-substituted perfluoroalkyl (linear) caborxylic acids_ii, n=15                                                   |             | FC(F)(F)OC(F)(F)C(F)(F)C(F)(F)C(F)(F)C(F)(F)C(F)(F)C(F)(F)C(F)(F)C(F)(F)C(F)(F)C(F)(F)C(O)=O | -9.85 | 0.69 | 3.27 | P | OUT |
| QL03366 | ether-substituted perfluoroalkyl (linear) caborxylic acids_ii, n=14                                                   |             | FC(F)(F)OC(F)(F)C(F)(F)C(F)(F)C(F)(F)C(F)(F)C(F)(F)C(F)(F)C(F)(F)C(F)(F)C(F)(F)C(F)(F)C(O)=O | -9.75 | 0.69 | 3.23 | P | OUT |
| QL03367 | ether-substituted perfluoroalkyl (linear) caborxylic acids_ii, n=13                                                   |             | FC(F)(F)OC(F)(F)C(F)(F)C(F)(F)C(F)(F)C(F)(F)C(F)(F)C(F)(F)C(F)(F)C(F)(F)C(F)(F)C(F)(F)C(O)=O | -9.50 | 0.68 | 3.11 | P | OUT |
| QL03368 | ether-substituted perfluoroalkyl (linear) caborxylic acids_ii, n=12                                                   |             | FC(F)(F)OC(F)(F)C(F)(F)C(F)(F)C(F)(F)C(F)(F)C(F)(F)C(F)(F)C(F)(F)C(F)(F)C(F)(F)C(O)=O        | -9.38 | 0.68 | 3.07 | P | OUT |
| QL03369 | ether-substituted perfluoroalkyl (linear) caborxylic acids_ii, n=11                                                   |             | FC(F)(F)OC(F)(F)C(F)(F)C(F)(F)C(F)(F)C(F)(F)C(F)(F)C(F)(F)C(F)(F)C(F)(F)C(O)=O               | -9.09 | 0.68 | 2.94 | P | OUT |
| QL03370 | ether-substituted perfluoroalkyl (linear) caborxylic acids_ii, n=10                                                   |             | FC(F)(F)OC(F)(F)C(F)(F)C(F)(F)C(F)(F)C(F)(F)C(F)(F)C(F)(F)C(F)(F)C(F)(F)C(O)=O               | -8.96 | 0.68 | 2.89 | P | OUT |
| QL03371 | ether-substituted perfluoroalkyl (linear) caborxylic acids_ii, n=9                                                    |             | FC(F)(F)OC(F)(F)C(F)(F)C(F)(F)C(F)(F)C(F)(F)C(F)(F)C(F)(F)C(F)(F)C(O)=O                      | -8.62 | 0.68 | 2.74 | P | IN  |
| QL03372 | ether-substituted perfluoroalkyl (linear) caborxylic acids_ii, n=8                                                    |             | FC(F)(F)OC(F)(F)C(F)(F)C(F)(F)C(F)(F)C(F)(F)C(F)(F)C(F)(F)C(O)=O                             | -8.46 | 0.68 | 2.68 | P | IN  |
| QL03373 | Heptane, 1,1,1,2,2,3,3,4,4,5,5,6,6,7,7-pentadecafluoro-7-(trifluoromethoxy)-                                          | 133881-46-6 | FC(F)(F)OC(F)(F)C(F)(F)C(F)(F)C(F)(F)C(F)(F)C(F)(F)C(F)(F)F                                  | -8.06 | 0.68 | 2.44 | P | IN  |
| QL03374 | 1-Chloro-1,1,2,2-tetrafluoro-2-(trifluoromethoxy)ethane                                                               | 1561-50-8   | FC(F)(F)OC(F)(F)C(F)(F)Cl                                                                    | -5.48 | 0.66 | 1.46 | P | IN  |
| QL03375 | 1,1,2,2-Tetrafluoro-1-iodo-2-(trifluoromethoxy)ethane                                                                 | 1561-52-0   | FC(F)(F)OC(F)(F)C(F)(F)I                                                                     | -5.48 | 0.66 | 1.46 | P | IN  |
| QL03376 | 1,1,2,2-Tetrafluoro-2-(trifluoromethoxy)-N,N-bis(trifluoromethyl)ethanamine                                           | 160228-75-1 | FC(F)(F)OC(F)(F)C(F)(F)N(C(F)(F)F)C(F)(F)F                                                   | -6.17 | 0.66 | 1.78 | P | IN  |
| QL03377 | 1-[bromo(difluoro)methoxy]-1,1,2,2-tetrafluoro-2-(trifluoromethoxy)ethane                                             | 87136-78-5  | FC(F)(F)OC(F)(F)C(F)(F)OC(F)(F)Br                                                            | -5.99 | 0.65 | 1.81 | P | IN  |
| QL03378 | 2,2-difluoro-2-[1,1,2,2-tetrafluoro-2-(trifluoromethoxy)ethoxy]acetyl Chloride                                        | 261503-81-5 | FC(F)(F)OC(F)(F)C(F)(F)OC(F)(F)C(Cl)=O                                                       | -6.75 | 0.65 | 2.19 | P | IN  |
| QL03379 | 1-[Bromo(difluoro)methoxy]-1,1,2,2-tetrafluoro-2-[1,1,2,2-tetrafluoro-2-(trifluoromethoxy)ethoxy]ethane               | 330562-45-3 | FC(F)(F)OC(F)(F)C(F)(F)OC(F)(F)C(F)(F)OC(F)(F)Br                                             | -7.23 | 0.66 | 2.33 | P | IN  |
| QL03380 | 1,1,1,3,3,4,4,6,6,7,7,9,10,10,12,13,13,15,15,15-Docosafluoro-2,5,8,11,14-pentaioxapentadecane                         | 64028-06-4  | FC(F)(F)OC(F)(F)C(F)(F)OC(F)(F)C(F)(F)OC(F)(F)C(F)(F)OC(F)(F)C(F)(F)OC(F)(F)F                | -8.66 | 0.67 | 2.95 | P | IN  |
| QL03381 | Perfluoro-2,5,8,11-tetraoxadodecane                                                                                   | 64028-04-2  | FC(F)(F)OC(F)(F)C(F)(F)OC(F)(F)C(F)(F)OC(F)(F)C(F)(F)OC(F)(F)F                               | -7.97 | 0.66 | 2.64 | P | IN  |
| QL03382 | 3-Ethenyl-1,1,2-trifluoro-2-{1,1,2,2-tetrafluoro-2-[1,1,2,2-tetrafluoro-2-(trifluoromethoxy)ethoxy]ethoxy}cyclobutane | 709620-35-9 | FC(F)(F)OC(F)(F)C(F)(F)OC(F)(F)C(F)(F)OC(F)(F)C(F)(F)OC1(F)C(CC1(F)F)C=C                     | -8.50 | 0.66 | 2.94 | P | IN  |
| QL03383 | 1-[Chloro(difluoro)methoxy]-1,1,2,2-tetrafluoro-2-(trifluoromethoxy)ethane                                            | 87136-79-6  | FC(F)(F)OC(F)(F)C(F)(F)OC(F)(F)Cl                                                            | -5.99 | 0.65 | 1.81 | P | IN  |
| QL03384 | 1-[Difluoro(iodo)methoxy]-1,1,2,2-tetrafluoro-2-(trifluoromethoxy)ethane                                              | 138370-72-6 | FC(F)(F)OC(F)(F)C(F)(F)OC(F)(F)I                                                             | -5.99 | 0.65 | 1.81 | P | IN  |
| QL03385 | 1,2-Dichloro(perfluoro-1-[(2-methoxyethoxy)methoxy]ethane)                                                            | 369371-43-7 | FC(F)(F)OC(F)(F)C(F)(F)OC(F)(F)OC(F)(Cl)C(F)(F)Cl                                            | -7.44 | 0.66 | 2.39 | P | IN  |
| QL03386 | 1,1,1,2,3,3-Hexafluoro-2,3-bis(trifluoromethoxy)propane                                                               | 95842-02-7  | FC(F)(F)OC(F)(F)C(F)(F)OC(F)(F)C(F)(F)F                                                      | -6.32 | 0.66 | 1.90 | P | IN  |
| QL03387 | ether-substituted perfluoroalkyl (linear) caborxylic acids, n=0                                                       |             | FC(F)(F)OC(F)(F)C(O)=O                                                                       | -4.90 | 0.63 | 1.49 | P | IN  |
| QL03388 | 1,2-dichloro(perfluoro-1-(methoxymethoxy)ethane)                                                                      | 874288-98-9 | FC(F)(F)OC(F)(F)OC(F)(Cl)C(F)(F)Cl                                                           | -6.28 | 0.65 | 1.91 | P | IN  |
| QL03389 | multiple ether-substituted perfluoroalkyl (linear) caborxylic acids, n=2                                              | 39492-89-2  | FC(F)(F)OC(F)(F)OC(F)(F)C(O)=O                                                               | -5.85 | 0.64 | 1.93 | P | IN  |
| QL03390 | multiple ether-substituted perfluoroalkyl (linear) caborxylic acids, n=3                                              | 39492-90-5  | FC(F)(F)OC(F)(F)OC(F)(F)OC(F)(F)C(O)=O                                                       | -6.56 | 0.64 | 2.27 | P | IN  |
| QL03391 | multiple ether-substituted perfluoroalkyl (linear) caborxylic acids, n=4                                              | 39492-91-6  | FC(F)(F)OC(F)(F)OC(F)(F)OC(F)(F)OC(F)(F)C(O)=O                                               | -7.13 | 0.64 | 2.54 | P | IN  |

[illegible]

[illegible]



[illegible]

|         |                                                                                                                                                                                                            |              |                                                                                                            |        |      |      |   |     |
|---------|------------------------------------------------------------------------------------------------------------------------------------------------------------------------------------------------------------|--------------|------------------------------------------------------------------------------------------------------------|--------|------|------|---|-----|
| QL03508 | Perfluoromethoxy perfluoropentane sulfonic acid<br>1,1,2,2,4,4,4-Heptafluoro-3-(iodomethyl)-1-(1,2,2,2-tetrafluoroethoxy)butane                                                                            |              | FC(OC(C(C(C(S(=O)(=O)O)(F)F)(F)F)(F)F)(F)F                                                                 | -7.58  | 0.68 | 2.23 | P | IN  |
| QL03509 |                                                                                                                                                                                                            | 25080-20-0   | FC(OC(F)(F)C(F)(F)C(CI)C(F)(F)C(F)(F)F                                                                     | -6.46  | 0.64 | 2.14 | P | IN  |
| QL03510 | [1,2-Difluoro-2-(heptafluoropropoxy)ethenyl]benzene                                                                                                                                                        | 854992-57-7  | FC(OC(F)(F)C(F)(F)C(F)(F)F)=C(F)C1=CC=CC=C1                                                                | -6.61  | 0.63 | 2.45 | P | OUT |
| QL03511 | Perfluoro-3-(1H-perfluoroethoxy)propane<br>1-Ethenyl-3-[1,1,2-trifluoro-2-(heptafluoropropoxy)ethoxy]benzene                                                                                               | 3330-15-2    | FC(OC(F)(F)C(F)(F)C(F)(F)F                                                                                 | -6.60  | 0.67 | 1.90 | P | IN  |
| QL03512 | 1-Ethenyl-2-[1,1,2-trifluoro-2-(heptafluoropropoxy)ethoxy]benzene                                                                                                                                          | 129051-93-0  | FC(OC(F)(F)C(F)(F)C(F)(F)C(F)(F)Oc1cccc(C=C)c1                                                             | -7.15  | 0.63 | 2.69 | P | OUT |
| QL03513 | 1-Ethenyl-2-[1,1,2-trifluoro-2-(heptafluoropropoxy)ethoxy]benzene                                                                                                                                          | 129051-94-1  | FC(OC(F)(F)C(F)(F)C(F)(F)C(F)(F)Oc1cccc1C=C                                                                | -6.69  | 0.63 | 2.47 | P | OUT |
| QL03514 | 2H-Perfluoro-5-methyl-3,6-dioxanonane                                                                                                                                                                      | 3330-14-1    | FC(OC(F)(F)C(F)(OC(F)(F)C(F)(F)C(F)(F)C(F)(F)C(F)(F)F                                                      | -7.79  | 0.67 | 2.43 | P | IN  |
| QL03515 | 2H-Perfluoro(5,8-dimethyl-3,6,9-trioxadodecane)                                                                                                                                                            | 3330-16-3    | FC(OC(F)(F)C(F)(OC(F)(F)C(F)(OC(F)(F)C(F)(F)C(F)(F)C(F)(F)C(F)(F)F                                         | -8.34  | 0.67 | 2.67 | P | IN  |
| QL03516 | Fluoroether E4                                                                                                                                                                                             | 26738-51-2   | FC(OC(F)(F)C(F)(OC(F)(F)C(F)(OC(F)(F)C(F)(F)C(F)(F)C(F)(F)C(F)(F)C(F)(F)F                                  | -9.04  | 0.68 | 3.01 | P | OUT |
| QL03517 | 2H-Tricosafuoro-5,8,11,14-tetrakis(trifluoromethyl)-3,6,9,12,15-pentaooxadecane                                                                                                                            | 37486-69-4   | FC(OC(F)(F)C(F)(OC(F)(F)C(F)(OC(F)(F)C(F)(OC(F)(F)C(F)(OC(F)(F)C(F)(F)C(F)(F)C(F)(F)C(F)(F)C(F)(F)F        | -9.42  | 0.68 | 3.19 | P | OUT |
| QL03518 | Fluoroether E-6<br>3,6,9,12,15,18,21-Heptaooxtetracosane,                                                                                                                                                  | 55154-18-2   | FC(OC(F)(F)C(F)(OC(F)(F)C(F)(OC(F)(F)C(F)(OC(F)(F)C(F)(OC(F)(F)C(F)(F)C(F)(F)C(F)(F)C(F)(F)C(F)(F)F        | -9.92  | 0.68 | 3.44 | P | OUT |
| QL03519 | 1,1,1,2,4,4,5,7,7,8,10,11,13,13,14,16,16,17,19,19,20,22,22,23,23,24,24,24-nonacosafuoro-5,8,11,14,17,20-hexakis(trifluoromethyl)-                                                                          | 59852-65-2   | FC(OC(F)(F)C(F)(OC(F)(F)C(F)(OC(F)(F)C(F)(OC(F)(F)C(F)(OC(F)(F)C(F)(OC(F)(F)C(F)(F)C(F)(F)C(F)(F)C(F)(F)F  | -10.21 | 0.68 | 3.57 | P | OUT |
| QL03520 | 3,6,9,12,15,18,21,24-Octaoxaheptacosane,<br>1,1,1,2,4,4,5,7,7,8,10,11,13,13,14,16,16,17,19,19,20,22,22,23,25,25,26,26,27,27,27-dotriacontafluoro-5,8,11,14,17,20,23-heptakis(trifluoromethyl)-             | 27120-63-4   | FC(OC(F)(F)C(F)(OC(F)(F)C(F)(OC(F)(F)C(F)(OC(F)(F)C(F)(OC(F)(F)C(F)(F)C(F)(F)C(F)(F)C(F)(F)C(F)(F)C(F)(F)F | -10.59 | 0.68 | 3.77 | P | OUT |
| QL03521 | 1,1,1,2,4,4,5,7,7,8,10,11,13,13,14,16,16,17,19,19,20,22,22,23,25,25,26,28,28,29,29,30,30,30-Pentatriacontafluoro-5,8,11,14,17,20,23,26-octakis(trifluoromethyl)-3,6,9,12,15,18,21,24,27-nonaooxtriacontane | 58979-41-2   | FC(OC(F)(F)C(F)(OC(F)(F)C(F)(OC(F)(F)C(F)(OC(F)(F)C(F)(OC(F)(F)C(F)(F)C(F)(F)C(F)(F)C(F)(F)C(F)(F)F        | -10.82 | 0.68 | 3.88 | P | OUT |
| QL03522 | (1Z)-1,2,3,3,3-Pentafluoro-1-(trifluoromethoxy)prop-1-ene                                                                                                                                                  | 1620992-19-9 | FC(OC(F)(F)F)=C(F)C(F)(F)F                                                                                 | -5.40  | 0.63 | 1.78 | P | OUT |
| QL03523 | (1E)-1,2,3,3,3-Pentafluoro-1-(trifluoromethoxy)prop-1-ene                                                                                                                                                  | 1621181-80-3 | FC(OC(F)(F)F)=C(F)C(F)(F)F                                                                                 | -5.40  | 0.63 | 1.78 | P | OUT |
| QL03524 | 4-((Heptadecafluorononenyl)oxy)benzenesulphonyl chloride                                                                                                                                                   | 59536-15-1   | FC(OC1=CC=C(C=C1)S(CI)(=O)=O)=C(F)C(F)(F)C(F)(F)C(F)(F)C(F)(F)C(F)(F)F                                     | -8.76  | 0.66 | 3.07 | P | IN  |
| QL03525 | p-((Undecafluorohexenyl)oxy)benzenesulphonyl chloride                                                                                                                                                      | 59493-82-2   | FC(OC1=CC=C(C=C1)S(CI)(=O)=O)=C(F)C(F)(F)C(F)(F)C(F)(F)C(F)(F)F                                            | -7.77  | 0.65 | 2.74 | P | IN  |
| QL03526 | (1Z)-1,2,3,3,4,4,5,5,6,6,7,7,8,8,8-Pentadecafluorooct-1-ene                                                                                                                                                | 1516885-18-9 | FC=C(F)C(F)(F)C(F)(F)C(F)(F)C(F)(F)C(F)(F)F                                                                | -7.32  | 0.67 | 2.24 | P | IN  |
| QL03527 | (1Z)-1,2,3,3,4,4,5,5,6,6,6-Undecafluorohex-1-ene                                                                                                                                                           | 168332-72-7  | FC=C(F)C(F)(F)C(F)(F)C(F)(F)C(F)(F)F                                                                       | -6.37  | 0.66 | 1.90 | P | IN  |
| QL03528 | 1,2,3,3,4,4,5,5,6,6,7,7,8,8,8-Pentadecafluorooct-1-ene                                                                                                                                                     | 7621-51-4    | FC=C(F)C(F)(F)C(F)(F)C(F)(F)C(F)(F)C(F)(F)F                                                                | -7.32  | 0.67 | 2.24 | P | IN  |
| QL03529 | 1H-Perfluoro-1-heptene                                                                                                                                                                                     | 75180-14-2   | FC=C(F)C(F)(F)C(F)(F)C(F)(F)C(F)(F)F                                                                       | -7.06  | 0.66 | 2.17 | P | IN  |
| QL03530 | 1,2,3,3,4,4,5,5,6,6-Undecafluorohex-1-ene                                                                                                                                                                  | 66249-21-6   | FC=C(F)C(F)(F)C(F)(F)C(F)(F)C(F)(F)F                                                                       | -6.37  | 0.66 | 1.90 | P | IN  |
| QL03532 | (Z)-1,2,3,3,3-pentafluoropropene                                                                                                                                                                           | 5528-43-8    | FC=C(F)C(F)(F)F                                                                                            | -3.89  | 0.60 | 1.41 | P | OUT |
| QL03533 | (1Z)-1,3,4,4,4-Pentafluoro-3-(trifluoromethyl)but-1-ene                                                                                                                                                    | 14318-61-7   | FC=C(C(F)(F)C(F)(F)F                                                                                       | -4.78  | 0.63 | 1.42 | P | IN  |
| QL03534 | (1E)-1,3,4,4,4-Pentafluoro-3-(trifluoromethyl)but-1-ene                                                                                                                                                    | 14149-41-8   | FC=CC(F)(C(F)(F)C(F)(F)F                                                                                   | -4.78  | 0.63 | 1.42 | P | IN  |
| QL03535 | Perfluoroglutaric anhydride                                                                                                                                                                                | 376-68-1     | FC1(F)C(=O)OC(=O)C(F)(F)C1(F)F                                                                             | -5.48  | 0.67 | 1.30 | P | IN  |
| QL03536 | Perfluorosuccinic anhydride                                                                                                                                                                                | 699-30-9     | FC1(F)C(=O)OC(=O)C1(F)F                                                                                    | -4.65  | 0.66 | 0.99 | P | IN  |
| QL03537 | 1,2-Dichloroperfluorocyclohexene                                                                                                                                                                           | 336-19-6     | FC1(F)C(Cl)=C(Cl)C(F)(F)C1(F)F                                                                             | -5.16  | 0.68 | 0.95 | P | IN  |
| QL03538 | Perfluorocyclohexanecarbonyl bromide                                                                                                                                                                       | 261761-76-6  | FC1(F)C(F)(F)C(F)(F)C(F)(F)C(F)(F)C1(F)F                                                                   | -6.29  | 0.69 | 1.44 | P | IN  |
| QL03539 | Chloroperfluorocyclohexane                                                                                                                                                                                 | 336-15-2     | FC1(F)C(F)(F)C(F)(F)C(F)(F)C(F)(F)C1(F)F                                                                   | -5.62  | 0.70 | 0.92 | P | OUT |
| QL03540 | (Perfluorocyclohexyl)methyl prop-2-enoate                                                                                                                                                                  | 40677-94-9   | FC1(F)C(F)(F)C(F)(F)C(F)(F)COC(=O)C=C(C)C(F)(F)C1(F)F                                                      | -7.02  | 0.66 | 2.17 | P | IN  |
| QL03541 | Perfluorocyclohexane                                                                                                                                                                                       | 355-68-0     | FC1(F)C(F)(F)C(F)(F)C(F)(F)C1(F)F                                                                          | -5.62  | 0.70 | 0.92 | P | OUT |
| QL03542 | Piperidine, 2,2,3,3,4,4,5,5,6,6-decafluoro-1-(pentafluoroethyl)-                                                                                                                                           | 564-11-4     | FC1(F)C(F)(F)C(F)(F)C(F)C(N1C(F)(F)C(F)(F)F                                                                | -7.32  | 0.69 | 1.91 | P | IN  |
| QL03543 | Decafluorocyclopentane                                                                                                                                                                                     | 376-77-2     | FC1(F)C(F)(F)C(F)(F)C1(F)F                                                                                 | -5.62  | 0.70 | 0.92 | P | OUT |
| QL03544 | (Perfluorocyclopentyl)phenyldiazene                                                                                                                                                                        | 97388-28-8   | FC1(F)C(F)(F)C(F)(F)C(F)(N=NC2=CC=CC=C2)C1(F)F                                                             | -6.55  | 0.65 | 2.13 | P | IN  |





|         |                                                                                            |              |                                                                         |       |      |      |   |     |
|---------|--------------------------------------------------------------------------------------------|--------------|-------------------------------------------------------------------------|-------|------|------|---|-----|
| QL03612 | Pentafluorosulfide Perfluoroalkyl (linear) sulfonic acids, n=4                             |              | FS(F)(F)(F)(F)C(F)(F)C(F)(F)C(F)(F)C(F)(F)S(O)(=O)=O                    | -7.78 | 0.71 | 1.87 | P | OUT |
| QL03613 | Pentafluorosulfide Perfluoroalkyl (linear) sulfonic acids, n=3                             |              | FS(F)(F)(F)(F)C(F)(F)C(F)(F)C(F)(F)S(O)(=O)=O                           | -7.59 | 0.71 | 1.75 | P | OUT |
| QL03614 | Ammonium perfluorobutanoate                                                                | 10495-86-0   | N.[O-]C(=O)C(F)(F)C(F)(F)C(F)(F)F                                       | -4.97 | 0.62 | 1.73 | P | OUT |
| QL03615 | perfluoropropanesulfonamido ethanol, n =3                                                  |              | N(CCO)S(=O)(=O)C(F)(F)C(F)(F)C(F)(F)F                                   | -6.48 | 0.64 | 2.21 | P | IN  |
| QL03616 | perfluoroethanesulfonamido ethanol, n =2                                                   |              | N(CCO)S(=O)(=O)C(F)(F)C(F)(F)F                                          | -5.63 | 0.63 | 1.95 | P | OUT |
| QL03617 | 4,4,5,5,6,6,6-Heptafluoro-L-norleucine                                                     | 148043-94-1  | NC[C@@H](CC(F)(F)C(F)(F)C(F)(F)C(F)O)=O                                 | -6.19 | 0.65 | 1.92 | P | IN  |
| QL03618 | Isooctanesulfonamide, heptadecafluoro-                                                     | 93894-56-5   | N[S](=O)(=O)C(F)(F)C(F)(F)C(F)(F)C(F)(F)C(F)(F)C(F)(F)C(F)(F)F          | -7.82 | 0.69 | 2.20 | P | IN  |
| QL03619 | (S)-Perfluorobutanesulfinamide                                                             | 1303994-31-1 | N[S@](=O)C(F)(F)C(F)(F)C(F)(F)C(F)(F)F                                  | -6.61 | 0.67 | 1.81 | P | IN  |
| QL03620 | 3,3,4,4,5,5,6,6,6-Nonafluoro-1-nitrohex-1-en-2-amine                                       | 223260-92-2  | NC(=C[N+](=[O-])=O)C(F)(F)C(F)(F)C(F)(F)C(F)(F)F                        | -6.82 | 0.65 | 2.18 | P | IN  |
| QL03621 | 3-Amino-4,4,5,5,6,6,6-heptafluoro-1-phenylhex-2-en-1-one                                   | 91508-85-9   | NC(=CC(=O)C1=CC=CC=C1)C(F)(F)C(F)(F)C(F)(F)F                            | -6.58 | 0.63 | 2.43 | P | OUT |
| QL03622 | Perfluorooctanamide                                                                        | 307-31-3     | NC(=N)C(F)(F)C(F)(F)C(F)(F)C(F)(F)C(F)(F)C(F)(F)C(F)(F)F                | -7.72 | 0.68 | 2.24 | P | IN  |
| QL03623 | 2,2,3,3,4,4,5,5,6,6,7,7,7-Tridecafluoroheptanimidamide                                     | 25264-81-7   | NC(=N)C(F)(F)C(F)(F)C(F)(F)C(F)(F)C(F)(F)C(F)(F)F                       | -7.50 | 0.68 | 2.16 | P | IN  |
| QL03624 | 2,2,3,3,4,4,5,5,6,6,6-Undecafluorohexanimidamide                                           | 464-21-1     | NC(=N)C(F)(F)C(F)(F)C(F)(F)C(F)(F)C(F)(F)F                              | -6.91 | 0.68 | 1.90 | P | IN  |
| QL03625 | Perfluorobutyrylamidine                                                                    | 375-19-9     | NC(=N)C(F)(F)C(F)(F)C(F)(F)F                                            | -5.76 | 0.67 | 1.46 | P | IN  |
| QL03626 | 2-(2,2,3,3,4,4,4-Heptafluorobutanoyl)hydrazine-1-carboximidamide                           | 25978-98-7   | NC(=N)NNC(=O)C(F)(F)C(F)(F)C(F)(F)F                                     | -6.40 | 0.64 | 2.18 | P | IN  |
| QL03627 | (1Z)-2,2,3,3,4,4,4-Heptafluoro-N'-(2,2,3,3,4,4,4-heptafluorobutanimidoyl)butanimidamide    | 648-13-5     | NC(=N/C(=N)C(F)(F)C(F)(F)C(F)(F)C(F)(F)C(F)(F)F                         | -7.72 | 0.67 | 2.38 | P | IN  |
| QL03628 | (1r,4r)-4-(Nonafluorobutyl)cyclohexane-1-carboxamide                                       | 88951-21-7   | NC(=O)[C@H]1CC[C@@H](CC1)C(F)(F)C(F)(F)C(F)(F)C(F)(F)F                  | -7.21 | 0.65 | 2.46 | P | IN  |
| QL03629 | (1r,4r)-4-(Heptafluoropropyl)cyclohexane-1-carboxamide                                     | 88951-19-3   | NC(=O)[C@H]1CC[C@H](CC1)C(F)(F)C(F)(F)C(F)(F)F                          | -6.66 | 0.64 | 2.29 | P | IN  |
| QL03630 | (1s,4s)-4-(Nonafluorobutyl)cyclohexane-1-carboxamide                                       | 88951-20-6   | NC(=O)[C@H]1CC[C@H](CC1)C(F)(F)C(F)(F)C(F)(F)C(F)(F)F                   | -7.21 | 0.65 | 2.46 | P | IN  |
| QL03631 | (1s,4s)-4-(Heptafluoropropyl)cyclohexane-1-carboxamide                                     | 88951-18-2   | NC(=O)[C@H]1CC[C@H](CC1)C(F)(F)C(F)(F)C(F)(F)F                          | -6.66 | 0.64 | 2.29 | P | IN  |
| QL03632 | 2,3,3,3-Tetrafluoro-2-(trifluoromethyl)propanamide                                         | 662-20-4     | NC(=O)C(F)(C(F)(F)F)C(F)(F)F                                            | -5.20 | 0.66 | 1.24 | P | IN  |
| QL03633 | nonadecafluorodecanamide                                                                   | 307-40-4     | NC(=O)C(F)(F)C(F)(F)C(F)(F)C(F)(F)C(F)(F)C(F)(F)C(F)(F)C(F)(F)F         | -8.35 | 0.69 | 2.51 | P | IN  |
| QL03634 | 2,2,3,3,4,4,5,5,6,6,7,7,8,8,9,9,9-Heptadecafluorononanamide                                | 82854-34-0   | NC(=O)C(F)(F)C(F)(F)C(F)(F)C(F)(F)C(F)(F)C(F)(F)C(F)(F)F                | -8.18 | 0.68 | 2.45 | P | IN  |
| QL03635 | Perfluorooctanamide                                                                        | 423-54-1     | NC(=O)C(F)(F)C(F)(F)C(F)(F)C(F)(F)C(F)(F)C(F)(F)F                       | -7.72 | 0.68 | 2.24 | P | IN  |
| QL03636 | Perfluorooctanedioic diamide                                                               | 3492-23-7    | NC(=O)C(F)(F)C(F)(F)C(F)(F)C(F)(F)C(F)(F)C(F)(F)C(N)=O                  | -7.47 | 0.67 | 2.23 | P | IN  |
| QL03637 | Perfluoroheptanamide                                                                       | 2358-22-7    | NC(=O)C(F)(F)C(F)(F)C(F)(F)C(F)(F)C(F)(F)F                              | -7.50 | 0.68 | 2.16 | P | IN  |
| QL03638 | 2,2,3,3,4,4,5,5,6,6,6-Undecafluorohexanamide                                               | 335-54-6     | NC(=O)C(F)(F)C(F)(F)C(F)(F)C(F)(F)C(F)(F)F                              | -6.91 | 0.68 | 1.90 | P | IN  |
| QL03639 | 2,2,3,3,4,4,5,5,6,6-Decafluoro-6-[(1,1,1,2,3,3,3-heptafluoropropan-2-yl)oxy]hexanamide     | 29952-92-9   | NC(=O)C(F)(F)C(F)(F)C(F)(F)C(F)(F)C(F)(F)OC(F)(C(F)(F)F)C(F)(F)F        | -7.95 | 0.68 | 2.41 | P | IN  |
| QL03640 | Octafluoroadipamide                                                                        | 355-66-8     | NC(=O)C(F)(F)C(F)(F)C(F)(F)C(F)(F)C(F)(F)C(N)=O                         | -6.57 | 0.67 | 1.89 | P | IN  |
| QL03641 | Nonafluoropentanamide                                                                      | 13485-61-5   | NC(=O)C(F)(F)C(F)(F)C(F)(F)C(F)(F)F                                     | -6.61 | 0.67 | 1.81 | P | IN  |
| QL03642 | Perfluoropentanamide                                                                       | 355-81-7     | NC(=O)C(F)(F)C(F)(F)C(F)(F)C(F)(F)F                                     | -6.21 | 0.66 | 1.81 | P | IN  |
| QL03643 | Heptafluorobutyramide                                                                      | 662-50-0     | NC(=O)C(F)(F)C(F)(F)C(F)(F)F                                            | -5.76 | 0.67 | 1.46 | P | IN  |
| QL03644 | Pentafluoropropionamide                                                                    | 354-76-7     | NC(=O)C(F)(F)C(F)(F)F                                                   | -5.29 | 0.66 | 1.36 | P | IN  |
| QL03645 | Propanamide, 3-[1-(difluoro[1,2,2-trifluoroethenyl]oxy)methyl]-1,2,2,2-tetrafluoroethoxy]- | 69804-18-8   | NC(=O)C(F)(F)C(F)(F)OC(F)(C(F)(F)F)C(F)(F)OC(F)=C(F)F                   | -7.28 | 0.65 | 2.43 | P | IN  |
| QL03646 | 2,2,3,3-Tetrafluoropropionamide                                                            | 2069-86-5    | NC(=O)C(F)(F)C(F)F                                                      | -4.61 | 0.63 | 1.39 | P | OUT |
| QL03647 | Perfluoro-2(1-propoxy)perfluoropropanamide                                                 | 13140-35-7   | NC(=O)C(F)(OC(F)(F)C(F)(F)C(F)(F)F)C(F)(F)F                             | -6.59 | 0.67 | 1.85 | P | IN  |
| QL03648 | 2,3,3,3-Tetrafluoro-2-[1,1,2,3,3,3-hexafluoro-2-(heptafluoropropoxy)propoxy]propanamide    | 60308-67-0   | NC(=O)C(F)(OC(F)(F)C(F)(F)C(F)(F)C(F)(F)F)C(F)(F)C(F)(F)F               | -7.79 | 0.67 | 2.40 | P | IN  |
| QL03649 | 2,3,3,3-Tetrafluoro-2-[1,1,2,3,3,3-hexafluoro-2-(heptafluoropropoxy)propoxy]propanamide    | 51445-02-4   | NC(=O)C(F)(OC(F)(F)C(F)(F)C(F)(F)C(F)(F)C(F)(F)F)C(F)(F)C(F)(F)C(F)(F)F | -8.36 | 0.68 | 2.67 | P | IN  |
| QL03650 | 2,3,3,3-Tetrafluoro-2-(trifluoromethoxy)propanamide                                        | 67710-48-9   | NC(=O)C(F)(OC(F)(F)F)C(F)(F)F                                           | -5.07 | 0.65 | 1.38 | P | IN  |
| QL03651 | Flupoxam                                                                                   | 119126-15-7  | NC(=O)c1nc(-c2cccc2)n(n1)-c1ccc(C)C(COCC(F)(F)C(F)(F)F)c1               | -6.85 | 0.61 | 2.88 | P | OUT |

[illegible]

|  |       |      |      |   |     |
|--|-------|------|------|---|-----|
|  | -7.86 | 0.67 | 2.43 | P | IN  |
|  | -5.76 | 0.67 | 1.46 | P | IN  |
|  | -6.21 | 0.66 | 1.83 | P | IN  |
|  | -6.19 | 0.65 | 1.92 | P | IN  |
|  | -6.07 | 0.65 | 1.92 | P | IN  |
|  | -6.60 | 0.63 | 2.45 | P | OUT |
|  | -6.93 | 0.65 | 2.26 | P | IN  |
|  | -6.45 | 0.64 | 2.13 | P | IN  |
|  | -6.38 | 0.64 | 2.21 | P | IN  |
|  | -6.93 | 0.69 | 1.79 | P | IN  |
|  | -5.65 | 0.63 | 1.86 | P | IN  |
|  | -7.51 | 0.66 | 2.45 | P | IN  |
|  | -7.00 | 0.66 | 2.26 | P | IN  |
|  | -6.63 | 0.65 | 2.17 | P | IN  |
|  | -6.01 | 0.64 | 1.91 | P | IN  |
|  | -6.25 | 0.63 | 2.23 | P | OUT |
|  | -5.97 | 0.64 | 1.93 | P | IN  |
|  | -8.56 | 0.67 | 2.89 | P | IN  |
|  | -5.86 | 0.64 | 1.90 | P | IN  |
|  | -8.35 | 0.67 | 2.74 | P | IN  |
|  | -7.72 | 0.66 | 2.52 | P | IN  |
|  | -6.90 | 0.65 | 2.26 | P | IN  |
|  | -7.09 | 0.64 | 2.49 | P | IN  |
|  | -7.08 | 0.65 | 2.43 | P | IN  |
|  | -8.22 | 0.67 | 2.69 | P | IN  |
|  | -6.19 | 0.65 | 1.92 | P | IN  |
|  | -6.12 | 0.63 | 2.10 | P | IN  |
|  | -6.12 | 0.63 | 2.10 | P | IN  |
|  | -6.05 | 0.65 | 1.79 | P | IN  |
|  | -6.93 | 0.65 | 2.35 | P | IN  |
|  | -6.44 | 0.65 | 2.01 | P | IN  |
|  | -5.14 | 0.63 | 1.68 | P | OUT |
|  | -6.77 | 0.65 | 2.24 | P | IN  |
|  | -6.99 | 0.63 | 2.56 | P | OUT |
|  | -6.85 | 0.64 | 2.42 | P | IN  |
|  | -6.51 | 0.64 | 2.18 | P | IN  |
|  | -6.72 | 0.63 | 2.44 | P | OUT |
|  | -5.44 | 0.64 | 1.71 | P | IN  |
|  | -7.56 | 0.66 | 2.46 | P | IN  |
|  | -8.16 | 0.66 | 2.85 | P | IN  |
|  | -5.45 | 0.64 | 1.74 | P | IN  |
|  | -7.51 | 0.66 | 2.45 | P | IN  |
|  | -6.64 | 0.65 | 2.17 | P | IN  |
|  | -5.65 | 0.65 | 1.68 | P | IN  |

|         |                                                                                                                                                  |              |                                                                                      |
|---------|--------------------------------------------------------------------------------------------------------------------------------------------------|--------------|--------------------------------------------------------------------------------------|
| QL03696 | 6-[[[2,2,3,3,4,4,5,5,6,6,7,7,7-Tridecafluoroheptyl]oxy]-<br>1,3,5-triazine-2,4-diamine                                                           | 57338-65-5   | Nc1nc(N)nc(OCC(F)(F)C(F)(F)C(F)(F)C(F)(F)C(F)(F)n1                                   |
| QL03697 | 2-(Heptafluoropropyl)-9H-purin-6-amine                                                                                                           | 147916-77-6  | Nc1nc(nc2Ncc1C#N)C(F)(F)C(F)(F)C(F)F                                                 |
| QL03698 | 4-Amino-2-(heptafluoropropyl)pyrimidine-5-carbonitrile<br>4,6-Bis{[(2,2,3,3,4,4,5,5,6,6,7,7,7-tridecafluoroheptyl)oxy]-<br>1,3,5-triazin-2-amine | 647-78-9     | Nc1nc(ncc1C#N)C(F)(F)C(F)(F)F                                                        |
| QL03699 |                                                                                                                                                  | 57338-64-4   | Nc1nc(OCC(F)(F)C(F)(F)C(F)(F)C(F)(F)C(F)(F)C(F)(F)C(F)(F)n1                          |
| QL03700 | 8-(Heptafluoropropyl)adenosine                                                                                                                   | 147916-81-2  | Nc1nccn2n@([C@@H]3O[C@H]([CO])C@[H])(O)[C@H]3O)c(nc12)C(F)(F)C(F)(F)C(F)F            |
| QL03701 | 3-(Heptafluoropropyl)-1H-1,2,4-triazol-5-amine                                                                                                   | 25979-02-6   | Nc1Nnc(n1)C(F)(F)C(F)(F)C(F)F                                                        |
| QL03702 | N-[5-Boron-o-2-(heptafluoropropyl)phenyl]glycinamide                                                                                             | 174778-60-0  | NCC(=O)Nc1ccc(ccc1C(F)(F)C(F)(F)C(F)(F)B)O                                           |
| QL03703 | N-[3-Boron-o-4-(heptafluoropropyl)phenyl]glycinamide                                                                                             | 174778-59-7  | NCC(=O)Nc1cccc(c1B)O)C(F)(F)C(F)(F)C(F)F                                             |
| QL03704 | 2,3,3,3-Tetrafluoro-2-(trifluoromethyl)propan-1-amine                                                                                            | 182243-54-5  | NCC(F)(C(F)(F)C(F))F                                                                 |
| QL03705 | Nonadecafluorodecan-1-amine                                                                                                                      | 307-36-8     | NCC(F)(F)C(F)(F)C(F)(F)C(F)(F)C(F)(F)C(F)(F)C(F)(F)F                                 |
| QL03706 | 1H,1H-Perfluorononylamine                                                                                                                        | 355-47-5     | NCC(F)(F)C(F)(F)C(F)(F)C(F)(F)C(F)(F)C(F)(F)C(F)F                                    |
| QL03707 | 1H,1H-Perfluorooctylamine                                                                                                                        | 307-29-9     | NCC(F)(F)C(F)(F)C(F)(F)C(F)(F)C(F)(F)C(F)F                                           |
| QL03708 | 1H,1H-Perfluoroheptylamine                                                                                                                       | 423-49-4     | NCC(F)(F)C(F)(F)C(F)(F)C(F)(F)C(F)F                                                  |
| QL03709 | 1H,1H-Perfluorohexylamine                                                                                                                        | 355-34-0     | NCC(F)(F)C(F)(F)C(F)(F)C(F)(F)F                                                      |
| QL03710 | 1H,1H-Perfluoropentylamine                                                                                                                       | 355-27-1     | NCC(F)(F)C(F)(F)C(F)(F)F                                                             |
| QL03711 | 1H,1H-Heptafluorobutylamine                                                                                                                      | 374-99-2     | NCC(F)(F)C(F)(F)F                                                                    |
| QL03712 | 1H,1H-Perfluoropropylamine                                                                                                                       | 422-03-7     | NCC(F)(F)C(F)F                                                                       |
| QL03713 | 1-Amino-3,3,4,4,5,5,6,6-nonafluorohexan-2-ol                                                                                                     | 135462-71-4  | NCC(O)C(F)(F)C(F)(F)C(F)(F)F                                                         |
| QL03714 | 1-Amino-3,3,4,4,5,5-heptafluoro-2-pentanol                                                                                                       | 336-53-8     | NCC(O)C(F)(F)C(F)(F)F                                                                |
| QL03715 | 1-Amino-4,4,5,5,6,6,7,7,8,9,9-dodecafluoro-8-(trifluoromethyl)nonan-2-ol                                                                         | 58935-89-0   | NCC(O)CC(F)(F)C(F)(F)C(F)(F)C(F)(F)C(F)(F)C(F)(F)                                    |
| QL03716 | 1-Amino-4,4,5,5,6,6,7,7,8,9,9,10,11,11,11-hexadecafluoro-10-(trifluoromethyl)undecan-2-ol                                                        | 54735-87-4   | NCC(O)CC(F)(F)C(F)(F)C(F)(F)C(F)(F)C(F)(F)C(F)(F)C(F)(F)                             |
| QL03717 | 1-{[4-(3,3,4,4,5,5,6,6,7,7,8,9,9,10,10,10-Heptadecafluorodecyl)phenyl]methanamine                                                                | 609816-23-1  | NCC1=CC=C(CCC(F)(F)C(F)(F)C(F)(F)C(F)(F)C(F)(F)C(F)(F)C(F)=C1                        |
| QL03718 | 1H,1H,2H,2H-Perfluorodecylamine                                                                                                                  | 30670-30-5   | NCCC(F)(F)C(F)(F)C(F)(F)C(F)(F)C(F)(F)C(F)(F)F                                       |
| QL03719 | 3,3,4,4,5,5,6,6,7,7,8,8,8-Tridecafluorooctylamine                                                                                                | 30556-86-6   | NCCC(F)(F)C(F)(F)C(F)(F)C(F)(F)F                                                     |
| QL03720 | 3,3,4,4,5,5,6,6,7,7,7-Undecafluoroheptan-1-amine                                                                                                 | 1346521-42-3 | NCCCC(F)(F)C(F)(F)C(F)(F)C(F)F                                                       |
| QL03721 | 3,3,4,4,5,5,5-Heptafluoropentan-1-amine                                                                                                          | 1000509-29-4 | NCCCC(F)(F)C(F)(F)F                                                                  |
| QL03722 | 3-(Perfluorooctyl)propylamine                                                                                                                    | 139175-50-1  | NCCCC(F)(F)C(F)(F)C(F)(F)C(F)(F)C(F)(F)F                                             |
| QL03723 | N-(3-Aminopropyl)-2,2,3,3,4,4,5,5,6,6,7,7,8,8,8-pentadecafluorooctanamide                                                                        | 85938-56-3   | NCCCN(C=O)C(F)(F)C(F)(F)C(F)(F)C(F)(F)C(F)(F)F                                       |
| QL03724 | 2,2,3,3,4,4,4-Heptafluorobutanimidohydrazide                                                                                                     | 663-24-1     | NNC(=N)C(F)(F)C(F)(F)F                                                               |
| QL03725 | Perfluorotetradecanedioic acid dihydrazide                                                                                                       | 5102-53-4    | NNC(=O)C(F)(F)C(F)(F)C(F)(F)C(F)(F)C(F)(F)C(F)(F)C(F)(F)C(F)(F)C(F)(F)C(F)(F)C(=O)NN |
| QL03726 | 2,2,3,3,4,4,5,5,6,6,7,7,7-Tridecafluoroheptanehydrazide                                                                                          | 33843-69-5   | NNC(=O)C(F)(F)C(F)(F)C(F)(F)C(F)(F)F                                                 |
| QL03727 | 2,2,3,3,4,4,4-heptafluorobutanehydrazide                                                                                                         | 1515-05-5    | NNC(=O)C(F)(F)C(F)(F)F                                                               |
| QL03728 | perfluoropropane sulfonamide, n=3                                                                                                                |              | NS(=O)=(O)C(F)(F)C(F)(F)F                                                            |
| QL03729 | perfluoroethane sulfonamide, n=2                                                                                                                 |              | NS(=O)=(O)C(F)(F)F                                                                   |
| QL03730 | 4-[[Heptadecafluorooctyl]oxy]benzene-1-sulfonamide                                                                                               | 89932-76-3   | NS(=O)=(O)C1=CC=C(OC(F)(F)C(F)(F)C(F)(F)C(F)(F)C(F)(F)C(F)F)C=C1                     |
| QL03731 | 4-[2-[[1,1,2,2,3,3,4,4,4-Nonafluorobutane-1-sulfonyl]amino]ethyl]benzene-1-sulfonamide                                                           | 316826-59-2  | NS(=O)=(O)c1ccc(CNS(=O)(=O)C(F)(F)C(F)(F)C(F)(F)F)cc1                                |
| QL03732 | 2,2,3,3,4,4,5,5,6,6,7,7,8,8,9,9-Heptadecafluoro-N-[[4-sulfamoylphenyl)methyl]nonanamide                                                          | 316827-33-5  | NS(=O)=(O)c1ccc(CNC(=O)C(F)(F)C(F)(F)C(F)(F)C(F)(F)C(F)(F)F)cc1                      |
| QL03733 | 2,2,3,3,4,4,5,5,6,6,7,7,7-Tridecafluoro-N-[[4-sulfamoylphenyl)methyl]heptanamide                                                                 | 165618-99-5  | NS(=O)=(O)c1ccc(CNC(=O)C(F)(F)C(F)(F)C(F)(F)C(F)(F)F)cc1                             |
| QL03734 | 2,2,3,3,4,4,5,5-Nonafluoro-N-[[4-sulfamoylphenyl)methyl]pentanamide                                                                              | 165618-98-4  | NS(=O)=(O)c1ccc(CNC(=O)C(F)(F)C(F)(F)C(F)F)cc1                                       |
| QL03735 | 2,2,3,3,4,4,4-Hepptafluoro-N-[[4-sulfamoylphenyl)methyl]butanamide                                                                               | 165618-97-3  | NS(=O)=(O)c1ccc(CNC(=O)C(F)(F)C(F)(F)F)cc1                                           |
| QL03736 | 3,3,4,4,5,5,6,6,7,7,8,8,8-Tridecafluorooctane-1-sulfonamide                                                                                      | 29765-95-5   | NS(=O)=(O)CCC(F)(F)C(F)(F)C(F)(F)C(F)(F)F                                            |

|  |       |      |      |   |     |
|--|-------|------|------|---|-----|
|  | -7.84 | 0.65 | 2.69 | P | IN  |
|  | -6.45 | 0.64 | 2.15 | P | IN  |
|  | -6.52 | 0.63 | 2.29 | P | IN  |
|  | -9.41 | 0.67 | 3.30 | P | OUT |
|  | -6.56 | 0.63 | 2.38 | P | OUT |
|  | -6.19 | 0.65 | 1.92 | P | IN  |
|  | -6.09 | 0.62 | 2.23 | P | OUT |
|  | -6.73 | 0.62 | 2.57 | P | OUT |
|  | -5.05 | 0.65 | 1.28 | P | IN  |
|  | -8.24 | 0.68 | 2.51 | P | IN  |
|  | -8.06 | 0.68 | 2.44 | P | IN  |
|  | -7.58 | 0.68 | 2.23 | P | IN  |
|  | -7.35 | 0.68 | 2.15 | P | IN  |
|  | -6.72 | 0.67 | 1.89 | P | IN  |
|  | -6.40 | 0.67 | 1.81 | P | IN  |
|  | -5.48 | 0.66 | 1.46 | P | IN  |
|  | -4.95 | 0.64 | 1.39 | P | IN  |
|  | -6.37 | 0.66 | 1.90 | P | IN  |
|  | -5.98 | 0.65 | 1.84 | P | IN  |
|  | -7.53 | 0.66 | 2.43 | P | IN  |
|  | -8.20 | 0.67 | 2.67 | P | IN  |
|  | -8.65 | 0.66 | 3.09 | P | IN  |
|  | -7.91 | 0.67 | 2.50 | P | IN  |
|  | -7.16 | 0.66 | 2.23 | P | IN  |
|  | -6.87 | 0.66 | 2.17 | P | IN  |
|  | -5.71 | 0.64 | 1.85 | P | IN  |
|  | -8.10 | 0.66 | 2.68 | P | IN  |
|  | -7.88 | 0.65 | 2.75 | P | IN  |
|  | -5.98 | 0.65 | 1.84 | P | IN  |
|  | -9.07 | 0.67 | 3.07 | P | OUT |
|  | -7.32 | 0.67 | 2.24 | P | IN  |
|  | -5.98 | 0.65 | 1.84 | P | IN  |
|  | -6.18 | 0.68 | 1.45 | P | IN  |
|  | -5.80 | 0.68 | 1.32 | P | IN  |
|  | -8.73 | 0.67 | 2.94 | P | IN  |
|  | -7.99 | 0.65 | 2.83 | P | IN  |
|  | -8.93 | 0.66 | 3.12 | P | OUT |
|  | -8.38 | 0.66 | 2.94 | P | IN  |
|  | -7.68 | 0.65 | 2.71 | P | IN  |
|  | -7.39 | 0.64 | 2.66 | P | IN  |
|  | -7.90 | 0.67 | 2.44 | P | IN  |

[illegible]





[illegible]



[illegible]

[illegible]

|         |                                                                                                                                          |              |                                                                                        |       |      |      |   |     |
|---------|------------------------------------------------------------------------------------------------------------------------------------------|--------------|----------------------------------------------------------------------------------------|-------|------|------|---|-----|
| QL03955 | 3-(Perfluoroisopropyl)-(2E)-difluoropropenoic acid                                                                                       | 103229-89-6  | OC(=O)C(F)=C(F)C(F)(C(F)(F)C(F)(F)F                                                    | -5.77 | 0.65 | 1.71 | P | IN  |
| QL03956 | 2,3,4,4,4-Pentafluoro-3-(trifluoromethyl)butanoic acid                                                                                   | 917951-62-3  | OC(=O)C(F)C(F)(C(F)(F)C(F)(F)F                                                         | -5.27 | 0.65 | 1.40 | P | IN  |
| QL03957 | (2Z)-4,4,5,5,6,6,6-Heptafluoro-3-phenylhex-2-enoic acid                                                                                  | 154375-43-6  | OC(=O)C=C(c1ccccc1)C(F)(F)C(F)(F)F                                                     | -5.75 | 0.62 | 2.11 | P | OUT |
| QL03959 | (3,3,4,4,5,5,6,6,7,7,8,8,9,9,10,10,10-heptadecafluorodecyl) hydrogen maleate                                                             | 54950-04-8   | OC(=O)C=C/C(=O)OCCC(F)(F)C(F)(F)C(F)(F)C(F)(F)C(F)(F)C(F)(F)C(F)(F)F                   | -8.61 | 0.65 | 3.09 | P | IN  |
| QL03960 | 4-[(Heptadecafluoroctyl)oxy]-4-oxobut-2-enoic acid                                                                                       | 152682-85-4  | OC(=O)C=CC(=O)OC(F)(F)C(F)(F)C(F)(F)C(F)(F)C(F)(F)C(F)(F)C(F)(F)F                      | -8.45 | 0.66 | 2.90 | P | IN  |
| QL03961 | (Perfluoroctyl)ethyl hydrogen fumarate                                                                                                   | 86130-60-1   | OC(=O)C=CC(=O)OCCC(F)(F)C(F)(F)C(F)(F)C(F)(F)C(F)(F)C(F)(F)C(F)(F)F                    | -8.61 | 0.65 | 3.09 | P | IN  |
| QL03962 | 4,4,5,5,6,6,6-Heptafluorohex-2-enoic acid                                                                                                | 356-03-6     | OC(=O)C=CC(F)(F)C(F)(F)C(F)(F)F                                                        | -6.00 | 0.64 | 1.93 | P | IN  |
| QL03964 | 5-[(Heptadecafluoronononyl)oxy]-1,3-benzenedicarboxylic acid                                                                             | 96210-37-6   | OC(=O)C1=CC=CC(OC(F)=C(F)C(F)(F)C(F)(F)C(F)(F)C(F)(F)C(F)(F)C(F)(F)C(F)(F)F)=C1)C(O)=O | -8.27 | 0.65 | 2.94 | P | IN  |
| QL03965 | 4-(Heptafluoroisopropyl)benzoic acid                                                                                                     | 2396-21-6    | OC(=O)C1=CC=C(C=C1)C(F)(C(F)(F)C(F)(F)F                                                | -6.20 | 0.64 | 2.10 | P | IN  |
| QL03966 | 4-(Heptadecafluoroctyl)benzoic acid                                                                                                      | 74701-33-0   | OC(=O)C1=CC=C(C=C1)C(F)(F)C(F)(F)C(F)(F)C(F)(F)C(F)(F)C(F)(F)C(F)(F)F                  | -8.58 | 0.67 | 2.90 | P | IN  |
| QL03967 | 4-(Nonafluorobutyl)benzoic acid                                                                                                          | 13835-88-6   | OC(=O)C1=CC=C(C=C1)C(F)(F)C(F)(F)C(F)(F)F                                              | -7.21 | 0.65 | 2.46 | P | IN  |
| QL03968 | 4-(Heptafluoropropyl)benzoic acid                                                                                                        | 88950-94-1   | OC(=O)C1=CC=C(C=C1)C(F)(F)C(F)(F)F                                                     | -6.66 | 0.64 | 2.29 | P | IN  |
| QL03969 | 4-[(1,2,3,3,4,4,5,5,6,6,7,7,8,8,9,9,9-Heptadecafluoronon-1-en-1-yl)oxy]benzoic acid                                                      | 58253-65-9   | OC(=O)C1=CC=C(OC(F)=C(F)C(F)(F)C(F)(F)C(F)(F)C(F)(F)C(F)(F)C(F)(F)C(F)(F)F)C=C1        | -8.60 | 0.65 | 3.08 | P | IN  |
| QL03970 | 2-[2,3,3,3-Tetrafluoro-2-(trifluoromethyl)propanoyl]benzoic acid                                                                         | 62656-73-9   | OC(=O)C1=CC=CC=C1C(=O)C(F)(C(F)(F)C(F)(F)F                                             | -5.48 | 0.63 | 1.82 | P | OUT |
| QL03971 | 2-[(2,2,3,3,4,4,4-heptafluorobutanoyl)amino]benzoic acid                                                                                 | 82422-33-1   | OC(=O)C1=CC=CC=C1NC(=O)C(F)(F)C(F)(F)C(F)(F)F                                          | -6.24 | 0.63 | 2.21 | P | OUT |
| QL03972 | 2-(1,1,2,2-Tetrafluoroethoxy)benzoic acid                                                                                                | 10008-97-6   | OC(=O)C1=CC=CC=C1OC(F)(F)C(F)F                                                         | -4.76 | 0.60 | 1.88 | P | OUT |
| QL03973 | 2,3,5,6-Tetrafluoro-4-(1,1,1,2,3,3,3-heptafluoropropan-2-yl)benzoic acid                                                                 | 20017-56-5   | OC(=O)c1c(F)c(F)c(c(F)c1F)C(F)(C(F)(F)F)C(F)(F)F                                       | -6.58 | 0.64 | 2.19 | P | IN  |
| QL03974 | 5-[(1,1,1,4,5,5-Heptafluoro-3-(1,1,1,2,3,3,3-heptafluoropropan-2-yl)-4-(trifluoromethyl)pent-2-en-2-yl)oxy]benzene-1,3-dicarboxylic acid | 97220-62-7   | OC(=O)c1cc(OC(=C(C(F)(F)C(F)(F)C(F)(F)C(F)(F)C(F)(F)C(F)(F)C(F)(F)F)cc(c1)C(O)=O       | -6.62 | 0.65 | 2.15 | P | IN  |
| QL03975 | 5-[1,1,2-Trifluoro-2-(heptafluoropropoxy)ethoxy]benzene-1,3-dicarboxylic acid                                                            | 1268707-97-6 | OC(=O)c1cc(OC(F)(F)C(F)(F)OC(F)(F)C(F)(F)F)cc(c1)C(O)=O                                | -7.26 | 0.64 | 2.64 | P | OUT |
| QL03976 | 4-(Pentadecafluoroheptyl)cyclohexane-1-carboxylic acid                                                                                   | 88951-28-4   | OC(=O)C1CCC(CC1)C(F)(F)C(F)(F)C(F)(F)C(F)(F)C(F)(F)C(F)(F)F                            | -8.19 | 0.66 | 2.75 | P | IN  |
| QL03977 | 4-(Tridecafluorohexyl)cyclohexane-1-carboxylic acid                                                                                      | 88951-27-3   | OC(=O)C1CCC(CC1)C(F)(F)C(F)(F)C(F)(F)C(F)(F)C(F)(F)F                                   | -8.00 | 0.66 | 2.71 | P | IN  |
| QL03978 | 4-(Undecafluoropentyl)cyclohexane-1-carboxylic acid                                                                                      | 88951-26-2   | OC(=O)C1CCC(CC1)C(F)(F)C(F)(F)C(F)(F)C(F)(F)F                                          | -7.52 | 0.65 | 2.53 | P | IN  |
| QL03979 | 4-(Heptafluoropropyl)cyclohexane-1-carboxylic acid                                                                                       | 88951-29-5   | OC(=O)C1CCC(CC1)C(F)(F)C(F)(F)F                                                        | -6.66 | 0.64 | 2.29 | P | IN  |
| QL03980 | 6-(Heptafluoropropyl)pyridine-3-carboxylic acid                                                                                          | 1105981-44-9 | OC(=O)c1ccc(nc1)C(F)(F)C(F)(F)F                                                        | -6.66 | 0.64 | 2.29 | P | IN  |
| QL03981 | 4-[(2,2,3,3,4,4,5,5,6,6,7,7,8,8,8-Pentadecafluoroctyl)amino]benzoic acid                                                                 | 73782-58-8   | OC(=O)c1ccc(NCC(F)(F)C(F)(F)C(F)(F)C(F)(F)C(F)(F)C(F)(F)C(F)(F)F)cc1                   | -8.40 | 0.66 | 2.96 | P | IN  |
| QL03982 | 4-[(1,1,1,4,5,5-Heptafluoro-3-(1,1,1,2,3,3,3-heptafluoropropan-2-yl)-4-(trifluoromethyl)pent-2-en-2-yl)oxy]benzoic acid                  | 65439-50-1   | OC(=O)c1ccc(OC(=C(C(F)(F)C(F)(F)C(F)(F)C(F)(F)C(F)(F)C(F)(F)F)cc1                      | -6.95 | 0.65 | 2.30 | P | IN  |
| QL03983 | 4-[(Pentadecafluoroheptyl)oxy]benzoic acid                                                                                               | 75895-47-5   | OC(=O)c1ccc(OC(F)(F)C(F)(F)C(F)(F)C(F)(F)C(F)(F)C(F)(F)F)cc1                           | -8.40 | 0.66 | 2.91 | P | IN  |
| QL03984 | 4-[(2,2,3,3,4,4,5,5,6,6,7,7,8,8,8-Pentadecafluoroctyl)oxy]benzoic acid                                                                   | 129560-87-8  | OC(=O)c1ccc(OCC(F)(F)C(F)(F)C(F)(F)C(F)(F)C(F)(F)C(F)(F)F)cc1                          | -8.40 | 0.66 | 2.96 | P | IN  |
| QL03985 | 4-(2,2,3,3,4,4,4-Heptafluorobutoxy)benzoic acid                                                                                          | 129590-24-5  | OC(=O)c1ccc(OCC(F)(F)C(F)(F)C(F)(F)F)cc1                                               | -6.87 | 0.63 | 2.53 | P | OUT |
| QL03986 | 4-[(3,3,4,4,5,5,6,6,7,7,8,8,9,9,10,10,10-Heptadecafluorodecyl)oxy]benzoic acid                                                           | 188034-84-6  | OC(=O)c1ccc(OCCC(F)(F)C(F)(F)C(F)(F)C(F)(F)C(F)(F)C(F)(F)C(F)(F)C(F)(F)F)cc1           | -8.72 | 0.66 | 3.13 | P | IN  |
| QL03987 | 3-(1,1,1,2,3,3,3-Heptafluoropropan-2-yl)benzoic acid                                                                                     | 2396-20-5    | OC(=O)c1cccc(c1)C(F)(C(F)(F)C(F)(F)F                                                   | -5.65 | 0.64 | 1.85 | P | IN  |
| QL03988 | 2-(Nonafluorobutyl)benzoic acid                                                                                                          | 14670-68-9   | OC(=O)c1cccc1C(F)(F)C(F)(F)C(F)(F)F                                                    | -6.49 | 0.64 | 2.16 | P | IN  |
| QL03989 | 2-(Heptafluoropropyl)pyridine-4-carboxylic acid                                                                                          | 20897-65-8   | OC(=O)c1ccnc(c1)C(F)(F)C(F)(F)F                                                        | -6.36 | 0.64 | 2.16 | P | IN  |
| QL03990 | 3,4-Bis(2,2,3,3,4,4,4-heptafluorobutyl)-1H-pyrrole-2,5-dicarboxylic acid                                                                 | 83650-67-3   | OC(=O)c1Nc(C(O)=O)c(CC(F)(F)C(F)(F)C(F)(F)F)c1CC(F)(F)C(F)(F)C(F)(F)F                  | -7.36 | 0.66 | 2.44 | P | IN  |
| QL03991 | 4,4,5,5,6,6,6-Heptafluoro-3-(nitromethyl)hexanoic acid                                                                                   | 7079-86-9    | OC(=O)CC(C[N+](=[O-])=O)C(F)(F)C(F)(F)F                                                | -5.57 | 0.63 | 1.89 | P | OUT |
| QL03992 | 2-(2,2,3,3,4,4,4-Heptafluorobutyl)butanedioic acid                                                                                       | 121223-84-5  | OC(=O)CC(CC(F)(F)C(F)(F)C(F)(F)C(O)=O                                                  | -6.12 | 0.63 | 2.10 | P | IN  |

[illegible]

[illegible]







[illegible]



|         |                                                                                                                                                                                                                                                                                                                         |                                  |                                                           |
|---------|-------------------------------------------------------------------------------------------------------------------------------------------------------------------------------------------------------------------------------------------------------------------------------------------------------------------------|----------------------------------|-----------------------------------------------------------|
| QL04218 | Poly(difluoromethylene), .alpha.-fluoro-.omega.-(2-hydroxyethyl)-, dihydrogen 2-hydroxy-1,2,3-propanetricarboxylate Poly(oxy-1,2-ethanediyl), alpha-hydro-omega-hydroxy-, ether with alpha-fluoro-omega-(2-hydroxyethyl)poly(difluoromethylene) (11)  Poly(difluoromethylene), .alpha.-fluoro-.omega.-(2-hydroxyethyl)- | 65605-56-3 65545-80-4 65530-60-1 | OCCCC(F)F                                                 |
| QL04219 | 5,5,6,6,7,7,8,8,9,10,10,10-Tridecafluoro-3-iododecan-1-ol                                                                                                                                                                                                                                                               | 16083-68-4                       | OCCCC(I)CC(F)(F)C(F)(F)C(F)(F)C(F)(F)C(F)(F)F             |
| QL04220 | 5,5,6,6,7,7,8,8,8-Nonafluoro-3-iodooctan-1-ol                                                                                                                                                                                                                                                                           | 109574-81-4                      | OCCCC(I)CC(F)(F)C(F)(F)C(F)(F)C(F)(F)F                    |
| QL04221 | 5,5,6,6,7,7,7-Heptafluoro-3-iodoheptan-1-ol                                                                                                                                                                                                                                                                             | 89621-93-2                       | OCCCC(I)CC(F)(F)C(F)(F)C(F)(F)F                           |
| QL04222 | 5,5,6,6,7,7,7-Heptafluoro-4,4-bis(trifluoromethyl)heptan-1-ol                                                                                                                                                                                                                                                           | 110254-90-5                      | OCCCCC(C(F)(F)F)(C(F)(F)F)C(F)(F)C(F)(F)C(F)(F)F          |
| QL04223 | 3-(Perfluoroisopropyl)propanol                                                                                                                                                                                                                                                                                          | 29819-73-6                       | OCCCC(F)(C(F)(F)F)C(F)(F)F                                |
| QL04224 | 3-(Perfluorooctyl)propanol                                                                                                                                                                                                                                                                                              | 1651-41-8                        | OCCCCC(F)(F)C(F)(F)C(F)(F)C(F)(F)C(F)(F)C(F)(F)F          |
| QL04225 | 73 fluorotelomer alcohol                                                                                                                                                                                                                                                                                                | 25600-66-2                       | OCCCCC(F)(F)C(F)(F)C(F)(F)C(F)(F)C(F)(F)C(F)(F)F          |
| QL04226 | 3-(Perfluorohexyl)propanol                                                                                                                                                                                                                                                                                              | 80806-68-4                       | OCCCCC(F)(F)C(F)(F)C(F)(F)C(F)(F)C(F)(F)F                 |
| QL04227 | 4,4,5,5,6,6,7,7,8,8,8-Undecafluorooctan-1-ol                                                                                                                                                                                                                                                                            | 1404193-88-9                     | OCCCCC(F)(F)C(F)(F)C(F)(F)C(F)(F)C(F)(F)F                 |
| QL04228 | 3-(Perfluorobutyl)-1-propanol                                                                                                                                                                                                                                                                                           | 83310-97-8                       | OCCCCC(F)(F)C(F)(F)C(F)(F)C(F)(F)F                        |
| QL04229 | 3-(Perfluoropropyl)propanol                                                                                                                                                                                                                                                                                             | 679-02-7                         | OCCCCC(F)(F)C(F)(F)C(F)(F)F                               |
| QL04230 | 3-(Perfluoroethyl)propanol                                                                                                                                                                                                                                                                                              | NOCAS_869964                     | OCCCCC(F)(F)C(F)(F)F                                      |
| QL04231 | 4,5,5,5-Tetrafluoro-4-(heptafluoropropoxy)pentan-1-ol                                                                                                                                                                                                                                                                   | 243128-41-8                      | OCCCCC(F)(OC(F)(F)C(F)(F)C(F)(F)C(F)(F)F                  |
| QL04232 | 6,6,7,7,8,8,9,9,10,10,11,11,11-Tridecafluoro-4-iodoundecan-1-ol                                                                                                                                                                                                                                                         | 132665-00-0                      | OCCCCC(I)CC(F)(F)C(F)(F)C(F)(F)C(F)(F)C(F)(F)F            |
| QL04233 | 5,5,6,6,7,7,8,8,9,10,10,10-Tridecafluorodecan-1-ol                                                                                                                                                                                                                                                                      | 39239-79-7                       | OCCCCC(F)(F)C(F)(F)C(F)(F)C(F)(F)C(F)(F)F                 |
| QL04234 | 44 Fluorotelomer alcohol                                                                                                                                                                                                                                                                                                | 3792-02-7                        | OCCCCC(F)(F)C(F)(F)C(F)(F)C(F)(F)F                        |
| QL04235 | 5,5,6,6,7,7,7-Heptafluoroheptan-1-ol                                                                                                                                                                                                                                                                                    | 883543-64-4                      | OCCCCC(F)(F)C(F)(F)C(F)(F)F                               |
| QL04236 | (5E)-7,7,8,8,9,9,10,10,10-Nonafluoro-5-iododec-5-en-1-ol                                                                                                                                                                                                                                                                | 137648-89-6                      | OCCCCC(I)=C/C(F)(F)C(F)(F)C(F)(F)C(F)(F)F                 |
| QL04237 | 6,6,7,7,8,8,9,9,10,10,11,11,11-Tridecafluoroundecan-1-ol                                                                                                                                                                                                                                                                | 134052-02-1                      | OCCCCCCC(F)(F)C(F)(F)C(F)(F)C(F)(F)C(F)(F)F               |
| QL04238 | 6,6,7,7,8,8,9,9,9-Nonafluorononan-1-ol                                                                                                                                                                                                                                                                                  | 219557-62-7                      | OCCCCC(F)(F)C(F)(F)C(F)(F)C(F)(F)F                        |
| QL04239 | 7,8,8,8-Tetrafluoro-7-(trifluoromethyl)octan-1-ol                                                                                                                                                                                                                                                                       | 220469-13-6                      | OCCCCCCC(F)(C(F)(F)F)C(F)(F)F                             |
| QL04240 | 7,7,8,8,9,9,10,10,11,11,12,12,13,14,14,14-Hexadecafluoro-13-(trifluoromethyl)tetradecan-1-ol                                                                                                                                                                                                                            | 390410-82-9                      | OCCCCCCC(F)(F)C(F)(F)C(F)(F)C(F)(F)C(F)(F)C(F)(F)C(F)(F)F |
| QL04241 | 7,7,8,8,9,9,10,10,11,11,12,12,13,13,14,14,14-heptafluorotetradecan-1-ol                                                                                                                                                                                                                                                 | 129794-54-3                      | OCCCCCCC(F)(F)C(F)(F)C(F)(F)C(F)(F)C(F)(F)C(F)(F)F        |
| QL04242 | 6-(Perfluorohexyl)hexanol                                                                                                                                                                                                                                                                                               | 161981-35-7                      | OCCCCC(F)(F)C(F)(F)C(F)(F)C(F)(F)C(F)(F)F                 |
| QL04243 | 7,7,8,8,9,9,10,10,10-nonafluorodecan-1-ol                                                                                                                                                                                                                                                                               | 181042-39-7                      | OCCCCC(F)(F)C(F)(F)C(F)(F)C(F)(F)F                        |
| QL04244 | 9,9,10,10,11,11,12,12,12-Nonafluoro-7-iodododecan-1-ol                                                                                                                                                                                                                                                                  | 172701-28-9                      | OCCCCC(I)CC(F)(F)C(F)(F)C(F)(F)C(F)(F)F                   |
| QL04245 | 9,9,10,10,11,11,12,12,12-Nonafluorododecan-1-ol                                                                                                                                                                                                                                                                         | 133001-14-6                      | OCCCCCCCCC(F)(F)C(F)(F)C(F)(F)C(F)(F)F                    |
| QL04246 | 11-(Perfluorooctyl)undec-10-enol                                                                                                                                                                                                                                                                                        | 15364-19-9                       | OCCCCCCCCC=CC(F)(F)C(F)(F)C(F)(F)C(F)(F)C(F)(F)C(F)(F)F   |
| QL04247 | 12,12,13,13,14,14,15,15,16,16,17,17,17-Tridecafluoroheptadec-10-en-1-ol                                                                                                                                                                                                                                                 | 117543-54-1                      | OCCCCCCCCC=CC(F)(F)C(F)(F)C(F)(F)C(F)(F)C(F)(F)F          |
| QL04249 | 12,12,13,13,14,14,15,15,16,16,17,17,18,18,19,19,19-Heptafluorononadecan-1-ol                                                                                                                                                                                                                                            | 1512-02-3                        | OCCCCCCCCCCCC(F)(F)C(F)(F)C(F)(F)C(F)(F)C(F)(F)C(F)(F)F   |
| QL04250 | 12,12,13,13,14,14,15,15,16,16,17,17,17-Tridecafluoroheptadecan-1-ol                                                                                                                                                                                                                                                     | 134052-01-0                      | OCCCCCCCCCCCC(F)(F)C(F)(F)C(F)(F)C(F)(F)C(F)(F)F          |
| QL04251 | 12,12,13,13,14,14,15,15,15-Nonafluoropentadecan-1-ol                                                                                                                                                                                                                                                                    | 36096-97-6                       | OCCCCCCCCCCC(F)(F)C(F)(F)C(F)(F)C(F)(F)F                  |
| QL04252 | 9-[(4,4,5,5,5-Pentafluoropentyl)sulfonyl]nonan-1-ol                                                                                                                                                                                                                                                                     | 511545-94-1                      | OCCCCCCCCSCCCC(F)(F)C(F)(F)F                              |
| QL04253 | 6-(2,2,3,3,4,4,4-Heptafluorobutoxy)hexan-1-ol                                                                                                                                                                                                                                                                           | 1207481-10-4                     | OCCCCCOC(F)(F)C(F)(F)C(F)(F)F                             |
| QL04254 | 3-(1,1,2,2,3,3,4,4,4-Nonafluorobutane-1-sulfonyl)propan-1-ol                                                                                                                                                                                                                                                            | 762241-70-3                      | OCCCS(=O)(=O)C(F)(F)C(F)(F)C(F)(F)C(F)(F)F                |

|       |      |      |   |     |
|-------|------|------|---|-----|
| -2.78 | 0.56 | 1.38 | P | OUT |
| -7.42 | 0.65 | 2.52 | P | IN  |
| -6.51 | 0.64 | 2.27 | P | IN  |
| -5.95 | 0.62 | 2.15 | P | OUT |
| -6.43 | 0.65 | 2.04 | P | IN  |
| -5.05 | 0.62 | 1.69 | P | OUT |
| -8.10 | 0.66 | 2.68 | P | IN  |
| -7.64 | 0.66 | 2.51 | P | IN  |
| -7.41 | 0.66 | 2.46 | P | IN  |
| -6.81 | 0.65 | 2.25 | P | IN  |
| -6.48 | 0.64 | 2.21 | P | IN  |
| -5.63 | 0.63 | 1.95 | P | OUT |
| -4.83 | 0.61 | 1.82 | P | OUT |
| -6.60 | 0.64 | 2.22 | P | IN  |
| -7.64 | 0.65 | 2.72 | P | IN  |
| -7.35 | 0.65 | 2.52 | P | IN  |
| -6.41 | 0.63 | 2.28 | P | OUT |
| -5.83 | 0.62 | 2.17 | P | OUT |
| -6.69 | 0.62 | 2.55 | P | OUT |
| -7.58 | 0.64 | 2.72 | P | IN  |
| -6.57 | 0.63 | 2.46 | P | OUT |
| -5.26 | 0.60 | 2.11 | P | OUT |
| -8.20 | 0.65 | 2.92 | P | IN  |
| -8.20 | 0.65 | 2.95 | P | IN  |
| -7.54 | 0.64 | 2.78 | P | OUT |
| -6.52 | 0.62 | 2.52 | P | OUT |
| -6.80 | 0.61 | 2.75 | P | OUT |
| -6.63 | 0.61 | 2.73 | P | OUT |
| -8.46 | 0.63 | 3.37 | P | OUT |
| -7.78 | 0.62 | 3.21 | P | OUT |
| -8.46 | 0.63 | 3.37 | P | OUT |
| -7.78 | 0.62 | 3.21 | P | OUT |
| -6.89 | 0.60 | 3.04 | P | OUT |
| -5.84 | 0.56 | 3.06 | P | OUT |
| -6.11 | 0.59 | 2.67 | P | OUT |
| -6.81 | 0.65 | 2.25 | P | IN  |



|         |                                                                                               |             |                                                                             |       |      |      |   |     |
|---------|-----------------------------------------------------------------------------------------------|-------------|-----------------------------------------------------------------------------|-------|------|------|---|-----|
| QL04280 | 2-Hydroxyethyl heptadecafluorononanoate                                                       | 92746-93-5  | OCOC(=O)C(F)(F)C(F)(F)C(F)(F)C(F)(F)C(F)(F)C(F)(F)C(F)(F)F                  | -8.12 | 0.66 | 2.74 | P | IN  |
| QL04281 | 2-[(2,2,3,3,4,4,5,5,6,6,7,7,7-Tridecafluoroheptyl)oxy]ethan-1-ol                              | 54336-60-6  | OCOCOC(F)(F)C(F)(F)C(F)(F)C(F)(F)C(F)(F)C(F)(F)F                            | -7.35 | 0.65 | 2.52 | P | IN  |
| QL04282 | 2-[(2,2,3,3,4,4,5,5,6,6,6-Undecafluorohexyl)oxy]ethan-1-ol                                    | 169289-67-2 | OCOCOC(F)(F)C(F)(F)C(F)(F)C(F)(F)C(F)(F)F                                   | -7.08 | 0.64 | 2.49 | P | IN  |
| QL04283 | 2-(2,2,3,3,4,4,4-Heptafluorobutoxy)ethan-1-ol                                                 | 2266-43-5   | OCOCOC(F)(F)C(F)(F)C(F)(F)F                                                 | -5.83 | 0.62 | 2.17 | P | OUT |
| QL04284 | 2-[(3,3,4,4,5,5,6,6,7,7,8,8,8-Tridecafluorooctyl)oxy]ethan-1-ol                               | 55427-50-4  | OCOCOC(F)(F)C(F)(F)C(F)(F)C(F)(F)C(F)(F)C(F)(F)F                            | -7.58 | 0.64 | 2.72 | P | IN  |
| QL04285 | 2-[(3,3,4,4,5,5,6,6,6-Nonafluorohexyl)oxy]ethan-1-ol                                          | 54949-99-4  | OCOCOC(F)(F)C(F)(F)C(F)(F)C(F)(F)F                                          | -6.57 | 0.63 | 2.46 | P | OUT |
| QL04286 | N-ethyl perfluorooctanesulfonamido polyethylene glycol, n=8, m=1                              |             | OCOCOCN(CC)S(=O)(=O)C(F)(F)C(F)(F)C(F)(F)C(F)(F)C(F)(F)C(F)(F)C(F)(F)F      | -8.43 | 0.65 | 3.08 | P | OUT |
| QL04287 | N-ethyl perfluoroheptanesulfonamido polyethylene glycol, n=7, m=1                             |             | OCOCOCN(CC)S(=O)(=O)C(F)(F)C(F)(F)C(F)(F)C(F)(F)C(F)(F)C(F)(F)F             | -8.04 | 0.64 | 2.95 | P | OUT |
| QL04288 | N-ethyl perfluorohexanesulfonamido polyethylene glycol, n=6, m=1                              |             | OCOCOCN(CC)S(=O)(=O)C(F)(F)C(F)(F)C(F)(F)C(F)(F)C(F)(F)F                    | -7.83 | 0.64 | 2.91 | P | OUT |
| QL04289 | N-ethyl perfluoropentanesulfonamido polyethylene glycol, n=5, m=1                             |             | OCOCOCN(CC)S(=O)(=O)C(F)(F)C(F)(F)C(F)(F)C(F)(F)F                           | -7.35 | 0.63 | 2.76 | P | OUT |
| QL04290 | 2,2,3,3,4,4,5,5,6,6,7,7,8,8,8-Pentadecafluoro-N-[2-(2-hydroxyethoxy)ethyl]octanamide          | 110388-02-8 | OCOCNC(=O)C(F)(F)C(F)(F)C(F)(F)C(F)(F)C(F)(F)C(F)(F)C(F)(F)F                | -8.03 | 0.64 | 2.97 | P | OUT |
| QL04291 | 2-[2-(2,2,3,3,4,4,4-Heptafluorobutoxy)ethoxy]ethan-1-ol                                       | 54336-56-0  | OCOCOCOC(F)(F)C(F)(F)C(F)(F)F                                               | -5.93 | 0.60 | 2.50 | P | OUT |
| QL04292 | N-ethyl perfluorooctanesulfonamido polyethylene glycol, n=8, m=2                              |             | OCOCOCOCN(CC)S(=O)(=O)C(F)(F)C(F)(F)C(F)(F)C(F)(F)C(F)(F)C(F)(F)F           | -8.53 | 0.64 | 3.29 | P | OUT |
| QL04293 | N-ethyl perfluoroheptanesulfonamido polyethylene glycol, n=7, m=2                             |             | OCOCOCOCN(CC)S(=O)(=O)C(F)(F)C(F)(F)C(F)(F)C(F)(F)C(F)(F)C(F)(F)F           | -8.32 | 0.63 | 3.25 | P | OUT |
| QL04294 | N-ethyl perfluorohexanesulfonamido polyethylene glycol, n=6, m=2                              |             | OCOCOCOCN(CC)S(=O)(=O)C(F)(F)C(F)(F)C(F)(F)C(F)(F)C(F)(F)F                  | -7.92 | 0.63 | 3.14 | P | OUT |
| QL04295 | N-ethyl perfluoropentanesulfonamido polyethylene glycol, n=5, m=2                             |             | OCOCOCOCN(CC)S(=O)(=O)C(F)(F)C(F)(F)C(F)(F)C(F)(F)F                         | -7.60 | 0.62 | 3.07 | P | OUT |
| QL04296 | N-ethyl perfluorooctanesulfonamido polyethylene glycol, n=8, m=3                              |             | OCOCOCOCOCN(CC)S(=O)(=O)C(F)(F)C(F)(F)C(F)(F)C(F)(F)C(F)(F)C(F)(F)F         | -8.70 | 0.63 | 3.51 | P | OUT |
| QL04297 | N-ethyl perfluoroheptanesulfonamido polyethylene glycol, n=7, m=3                             |             | OCOCOCOCOCN(CC)S(=O)(=O)C(F)(F)C(F)(F)C(F)(F)C(F)(F)C(F)(F)F                | -8.36 | 0.62 | 3.41 | P | OUT |
| QL04298 | N-ethyl perfluorohexanesulfonamido polyethylene glycol, n=6, m=3                              |             | OCOCOCOCOCN(CC)S(=O)(=O)C(F)(F)C(F)(F)C(F)(F)C(F)(F)C(F)(F)F                | -8.08 | 0.62 | 3.36 | P | OUT |
| QL04299 | N-ethyl perfluoropentanesulfonamido polyethylene glycol, n=5, m=3                             |             | OCOCOCOCOCN(CC)S(=O)(=O)C(F)(F)C(F)(F)C(F)(F)C(F)(F)F                       | -7.67 | 0.61 | 3.25 | P | OUT |
| QL04300 | N-ethyl perfluorooctanesulfonamido polyethylene glycol, n=8, m=4                              |             | OCOCOCOCOCOCN(CC)S(=O)(=O)C(F)(F)C(F)(F)C(F)(F)C(F)(F)C(F)(F)C(F)(F)F       | -8.73 | 0.62 | 3.65 | P | OUT |
| QL04301 | N-ethyl perfluoroheptanesulfonamido polyethylene glycol, n=7, m=4                             |             | OCOCOCOCOCOCN(CC)S(=O)(=O)C(F)(F)C(F)(F)C(F)(F)C(F)(F)C(F)(F)F              | -8.50 | 0.61 | 3.60 | P | OUT |
| QL04302 | N-ethyl perfluorohexanesulfonamido polyethylene glycol, n=6, m=4                              |             | OCOCOCOCOCOCN(CC)S(=O)(=O)C(F)(F)C(F)(F)C(F)(F)C(F)(F)C(F)(F)F              | -8.14 | 0.61 | 3.51 | P | OUT |
| QL04303 | N-ethyl perfluoropentanesulfonamido polyethylene glycol, n=5, m=4                             |             | OCOCOCOCOCOCN(CC)S(=O)(=O)C(F)(F)C(F)(F)C(F)(F)C(F)(F)F                     | -7.85 | 0.60 | 3.47 | P | OUT |
| QL04304 | 16,16,17,17,18,18,19,19,20,20,21,21,22,22,22-Pentadecafluoro-3,6,9,12,15-pentaaxadocosan-1-ol | 93704-25-7  | OCOCOCOCOCOCOCOC(F)(F)C(F)(F)C(F)(F)C(F)(F)C(F)(F)C(F)(F)F                  | -8.21 | 0.61 | 3.51 | P | OUT |
| QL04305 | N-ethyl perfluorooctanesulfonamido polyethylene glycol, n=8, m=5                              |             | OCOCOCOCOCOCOCOCN(CC)S(=O)(=O)C(F)(F)C(F)(F)C(F)(F)C(F)(F)C(F)(F)C(F)(F)F   | -8.85 | 0.61 | 3.81 | P | OUT |
| QL04306 | N-ethyl perfluoroheptanesulfonamido polyethylene glycol, n=7, m=5                             |             | OCOCOCOCOCOCOCOCN(CC)S(=O)(=O)C(F)(F)C(F)(F)C(F)(F)C(F)(F)C(F)(F)F          | -8.54 | 0.61 | 3.73 | P | OUT |
| QL04307 | N-ethyl perfluorohexanesulfonamido polyethylene glycol, n=6, m=5                              |             | OCOCOCOCOCOCOCOCN(CC)S(=O)(=O)C(F)(F)C(F)(F)C(F)(F)C(F)(F)C(F)(F)F          | -8.29 | 0.60 | 3.70 | P | OUT |
| QL04308 | N-ethyl perfluoropentanesulfonamido polyethylene glycol, n=5, m=5                             |             | OCOCOCOCOCOCOCOCN(CC)S(=O)(=O)C(F)(F)C(F)(F)C(F)(F)C(F)(F)F                 | -7.92 | 0.59 | 3.61 | P | OUT |
| QL04309 | N-ethyl perfluorooctanesulfonamido polyethylene glycol, n=8, m=6                              |             | OCOCOCOCOCOCOCOCOCN(CC)S(=O)(=O)C(F)(F)C(F)(F)C(F)(F)C(F)(F)C(F)(F)C(F)(F)F | -8.90 | 0.61 | 3.92 | P | OUT |
| QL04310 | N-ethyl perfluoroheptanesulfonamido polyethylene glycol, n=7, m=6                             |             | OCOCOCOCOCOCOCOCOCN(CC)S(=O)(=O)C(F)(F)C(F)(F)C(F)(F)C(F)(F)C(F)(F)F        | -8.68 | 0.60 | 3.89 | P | OUT |
| QL04311 | N-ethyl perfluorohexanesulfonamido polyethylene glycol, n=6, m=6                              |             | OCOCOCOCOCOCOCOCOCN(CC)S(=O)(=O)C(F)(F)C(F)(F)C(F)(F)C(F)(F)C(F)(F)F        | -8.35 | 0.59 | 3.82 | P | OUT |
| QL04312 | N-ethyl perfluoropentanesulfonamido polyethylene glycol, n=5, m=6                             |             | OCOCOCOCOCOCOCOCOCN(CC)S(=O)(=O)C(F)(F)C(F)(F)C(F)(F)C(F)(F)F               | -8.09 | 0.59 | 3.79 | P | OUT |

[illegible]



[illegible]



|         |                                                                             |                                                                                                      |       |      |      |   |     |
|---------|-----------------------------------------------------------------------------|------------------------------------------------------------------------------------------------------|-------|------|------|---|-----|
| QL04406 | perfluoroalkanesulfonamido sulfonate betaine D, n=5                         | <chem>S(N(C)CCC[N+](CCCS(=O)(O)=O)(C)C(=O)(=O)C(F)(F)C(F)(F)C(F)(F)C(F)(F)F</chem>                   | -8.51 | 0.65 | 3.04 | P | IN  |
| QL04407 | perfluoroalkanesulfonamido sulfonate betaine D, n=4                         | <chem>S(N(C)CCC[N+](CCCS(=O)(O)=O)(C)C(=O)(=O)C(F)(F)C(F)(F)C(F)(F)F</chem>                          | -8.12 | 0.65 | 2.90 | P | IN  |
| QL04408 | perfluoroalkanesulfonamido sulfonate betaine D, n=3                         | <chem>S(N(C)CCC[N+](CCCS(=O)(O)=O)(C)C(=O)(=O)C(F)(F)C(F)(F)C(F)(F)F</chem>                          | -7.85 | 0.64 | 2.84 | P | IN  |
| QL04409 | perfluoroalkanesulfonamido quaternary ammonium dicarboxylate A, n=6         | <chem>S(N(CC(O)=O)CCC[N+](CC(O)=O)(C)C(=O)(=O)C(F)(F)C(F)(F)C(F)(F)C(F)(F)F</chem>                   | -8.17 | 0.65 | 2.94 | P | IN  |
| QL04410 | perfluoroalkanesulfonamido quaternary ammonium dicarboxylate A, n=5         | <chem>S(N(CC(O)=O)CCC[N+](CC(O)=O)(C)C(=O)(=O)C(F)(F)C(F)(F)C(F)(F)C(F)(F)F</chem>                   | -7.92 | 0.64 | 2.88 | P | IN  |
| QL04411 | perfluoroalkanesulfonamido quaternary ammonium dicarboxylate A, n=4         | <chem>S(N(CC(O)=O)CCC[N+](CC(O)=O)(C)C(=O)(=O)C(F)(F)C(F)(F)C(F)(F)C(F)(F)F</chem>                   | -7.48 | 0.64 | 2.73 | P | OUT |
| QL04412 | perfluoroalkanesulfonamido quaternary ammonium dicarboxylate A, n=3         | <chem>S(N(CC(O)=O)CCC[N+](CC(O)=O)(C)C(=O)(=O)C(F)(F)C(F)(F)C(F)(F)F</chem>                          | -7.03 | 0.63 | 2.59 | P | OUT |
| QL04413 | perfluoroalkanesulfonamido quaternary ammonium sulfonate carboxylate B, n=6 | <chem>S(N(CC(O)=O)CCC[N+](CC(O)CS(=O)(O)=O)(C)C(=O)(=O)C(F)(F)C(F)(F)C(F)(F)C(F)(F)C(F)(F)F</chem>   | -8.51 | 0.65 | 3.10 | P | IN  |
| QL04414 | perfluoroalkanesulfonamido quaternary ammonium sulfonate carboxylate B, n=5 | <chem>S(N(CC(O)=O)CCC[N+](CC(O)CS(=O)(O)=O)(C)C(=O)(=O)C(F)(F)C(F)(F)C(F)(F)C(F)(F)F</chem>          | -8.20 | 0.65 | 3.00 | P | OUT |
| QL04415 | perfluoroalkanesulfonamido quaternary ammonium sulfonate carboxylate B, n=4 | <chem>S(N(CC(O)=O)CCC[N+](CC(O)CS(=O)(O)=O)(C)C(=O)(=O)C(F)(F)C(F)(F)C(F)(F)F</chem>                 | -7.83 | 0.64 | 2.87 | P | OUT |
| QL04416 | perfluoroalkanesulfonamido quaternary ammonium sulfonate carboxylate B, n=3 | <chem>S(N(CC(O)=O)CCC[N+](CC(O)CS(=O)(O)=O)(C)C(=O)(=O)C(F)(F)C(F)(F)C(F)(F)F</chem>                 | -7.54 | 0.64 | 2.80 | P | OUT |
| QL04417 | perfluoroalkanesulfonamido quaternary ammonium sulfonate carboxylate A, n=6 | <chem>S(N(CC(O)=O)CCC[N+](CCCS(=O)(O)=O)(C)C(=O)(=O)C(F)(F)C(F)(F)C(F)(F)C(F)(F)F</chem>             | -8.50 | 0.65 | 3.10 | P | IN  |
| QL04418 | perfluoroalkanesulfonamido quaternary ammonium sulfonate carboxylate A, n=5 | <chem>S(N(CC(O)=O)CCC[N+](CCCS(=O)(O)=O)(C)C(=O)(=O)C(F)(F)C(F)(F)C(F)(F)C(F)(F)F</chem>             | -8.19 | 0.65 | 3.00 | P | OUT |
| QL04419 | perfluoroalkanesulfonamido quaternary ammonium sulfonate carboxylate A, n=4 | <chem>S(N(CC(O)=O)CCC[N+](CCCS(=O)(O)=O)(C)C(=O)(=O)C(F)(F)C(F)(F)C(F)(F)C(F)(F)F</chem>             | -7.81 | 0.64 | 2.87 | P | OUT |
| QL04420 | perfluoroalkanesulfonamido quaternary ammonium disulfonate B, n=6           | <chem>S(N(CC(O)CS(=O)(O)=O)CCC[N+](CC(O)CS(=O)(O)=O)(C)C(=O)(=O)C(F)(F)C(F)(F)C(F)(F)C(F)(F)F</chem> | -8.51 | 0.65 | 3.09 | P | IN  |
| QL04422 | perfluoroalkanesulfonamido quaternary ammonium disulfonate B, n=5           | <chem>S(N(CC(O)CS(=O)(O)=O)CCC[N+](CC(O)CS(=O)(O)=O)(C)C(=O)(=O)C(F)(F)C(F)(F)C(F)(F)C(F)(F)F</chem> | -8.20 | 0.65 | 2.98 | P | IN  |
| QL04423 | perfluoroalkanesulfonamido quaternary ammonium disulfonate B, n=4           | <chem>S(N(CC(O)CS(=O)(O)=O)CCC[N+](CC(O)CS(=O)(O)=O)(C)C(=O)(=O)C(F)(F)C(F)(F)C(F)(F)F</chem>        | -7.86 | 0.64 | 2.86 | P | IN  |
| QL04424 | perfluoroalkanesulfonamido quaternary ammonium disulfonate B, n=3           | <chem>S(N(CC(O)CS(=O)(O)=O)CCC[N+](CC(O)CS(=O)(O)=O)(C)C(=O)(=O)C(F)(F)C(F)(F)C(F)(F)F</chem>        | -7.52 | 0.64 | 2.75 | P | OUT |
| QL04425 | perfluoroalkanesulfonamido quaternary diol sulfonic acid, n=6               | <chem>S(N(CC(O)CS(=O)(O)=O)CCC[N+](CC(O)CS(=O)(O)=O)(C)C(=O)(=O)C(F)(F)C(F)(F)F</chem>               | -7.47 | 0.63 | 2.80 | P | OUT |
| QL04426 | perfluoroalkanesulfonamido quaternary diol sulfonic acid, n=5               | <chem>S(N(CC(O)CS(O)(=O)=O)CCC[N+](CCO)(C)C(=O)(=O)C(F)(F)C(F)(F)C(F)(F)C(F)(F)F</chem>              | -8.02 | 0.65 | 2.90 | P | IN  |
| QL04427 | perfluoroalkanesulfonamido quaternary diol sulfonic acid, n=4               | <chem>S(N(CC(O)CS(O)(=O)=O)CCC[N+](CCO)(C)C(=O)(=O)C(F)(F)C(F)(F)C(F)(F)C(F)(F)F</chem>              | -7.76 | 0.64 | 2.83 | P | OUT |
| QL04428 | perfluoroalkanesulfonamido quaternary diol sulfonic acid, n=3               | <chem>S(N(CC(O)CS(O)(=O)=O)CCC[N+](CCO)(C)C(=O)(=O)C(F)(F)C(F)(F)C(F)(F)F</chem>                     | -7.37 | 0.64 | 2.70 | P | OUT |
| QL04429 | N-ethyl perfluorodecane sulfonamido acetic acid, n=10                       | <chem>S(N(CC)CC(O)=O)(=O)(=O)C(F)(F)C(F)(F)C(F)(F)C(F)(F)C(F)(F)C(F)(F)C(F)(F)F</chem>               | -6.96 | 0.63 | 2.58 | P | OUT |
| QL04430 | N-ethyl perfluorononane sulfonamido acetic acid, n=9                        | <chem>S(N(CC)CC(O)=O)(=O)(=O)C(F)(F)C(F)(F)C(F)(F)C(F)(F)C(F)(F)C(F)(F)C(F)(F)F</chem>               | -8.78 | 0.67 | 2.95 | P | IN  |
| QL04431 | N-ethyl perfluoropropane sulfonamido acetic acid, n=3                       | <chem>S(N(CC)CC(O)=O)(=O)(=O)C(F)(F)C(F)(F)C(F)(F)F</chem>                                           | -8.62 | 0.67 | 2.90 | P | IN  |
| QL04432 | N-ethyl perfluoroethane sulfonamido acetic acid, n=2                        | <chem>S(N(CC)CC(O)=O)(=O)(=O)C(F)(F)C(F)(F)F</chem>                                                  | -6.45 | 0.64 | 2.18 | P | IN  |
| QL04433 | perfluoroalkanesulfonamido betaine C, n=6                                   | <chem>S(N(CC)CCC[N+](CCC(O)=O)(C)C(=O)(=O)C(F)(F)C(F)(F)C(F)(F)C(F)(F)F</chem>                       | -5.65 | 0.63 | 1.92 | P | OUT |
| QL04434 | perfluoroalkanesulfonamido betaine C, n=5                                   | <chem>S(N(CC)CCC[N+](CCC(O)=O)(C)C(=O)(=O)C(F)(F)C(F)(F)C(F)(F)C(F)(F)F</chem>                       | -8.39 | 0.65 | 3.07 | P | OUT |
| QL04435 | perfluoroalkanesulfonamido quaternary ammonium carboxylic acid, n=6         | <chem>S(N(CCC(=O)O)CCC[N+](C)C)C(=O)(=O)C(F)(F)C(F)(F)C(F)(F)C(F)(F)C(F)(F)F</chem>                  | -7.99 | 0.64 | 2.94 | P | OUT |
| QL04436 | perfluoroalkanesulfonamido quaternary ammonium carboxylic acid, n=5         | <chem>S(N(CCC(=O)O)CCC[N+](C)C)C(=O)(=O)C(F)(F)C(F)(F)C(F)(F)C(F)(F)F</chem>                         | -7.90 | 0.65 | 2.75 | P | IN  |
| QL04437 | perfluoroalkanesulfonamido quaternary ammonium carboxylic acid, n=4         | <chem>S(N(CCC(=O)O)CCC[N+](C)C)C(=O)(=O)C(F)(F)C(F)(F)C(F)(F)F</chem>                                | -7.67 | 0.65 | 2.69 | P | IN  |
| QL04438 |                                                                             | <chem>S(N(CCC(=O)O)CCC[N+](C)C)C(=O)(=O)C(F)(F)C(F)(F)C(F)(F)F</chem>                                | -7.19 | 0.64 | 2.52 | P | IN  |

|         |                                                                           |                                                                                                              |       |      |      |   |     |
|---------|---------------------------------------------------------------------------|--------------------------------------------------------------------------------------------------------------|-------|------|------|---|-----|
| QL04439 | perfluoroalkanesulfonamido quaternary ammonium carboxylic acid, n=3       | <chem>S(N(CCC(=O)O)CCC[N+](C)(C)C(=O)(=O)C(F)(F)C(F)(F)C(F)(F)F</chem>                                       | -6.84 | 0.64 | 2.43 | P | IN  |
| QL04440 | perfluoroalkanesulfonamido quaternary ammonium dicarboxylate B, n=6       | <chem>S(N(CCC(O)=O)CCC[N+](CC(O)=O)(C)C(=O)(=O)C(F)(F)C(F)(F)C(F)(F)C(F)(F)C(F)(F)F</chem>                   | -8.09 | 0.65 | 2.95 | P | IN  |
| QL04441 | perfluoroalkanesulfonamido quaternary ammonium dicarboxylate B, n=5       | <chem>S(N(CCC(O)=O)CCC[N+](CC(O)=O)(C)C(=O)(=O)C(F)(F)C(F)(F)C(F)(F)C(F)(F)F</chem>                          | -7.84 | 0.64 | 2.88 | P | OUT |
| QL04442 | perfluoroalkanesulfonamido quaternary ammonium dicarboxylate B, n=4       | <chem>S(N(CCC(O)=O)CCC[N+](CC(O)=O)(C)C(=O)(=O)C(F)(F)C(F)(F)C(F)(F)C(F)(F)F</chem>                          | -7.33 | 0.64 | 2.70 | P | OUT |
| QL04443 | perfluoroalkanesulfonamido quaternary ammonium dicarboxylate C, n=6       | <chem>S(N(CCC(O)=O)CCC[N+](CCC(O)=O)(C)C(=O)(=O)C(F)(F)C(F)(F)C(F)(F)C(F)(F)C(F)(F)F</chem>                  | -8.26 | 0.64 | 3.06 | P | OUT |
| QL04444 | perfluoroalkanesulfonamido quaternary ammonium dicarboxylate C, n=5       | <chem>S(N(CCC(O)=O)CCC[N+](CCC(O)=O)(C)C(=O)(=O)C(F)(F)C(F)(F)C(F)(F)C(F)(F)F</chem>                         | -7.81 | 0.64 | 2.90 | P | OUT |
| QL04445 | perfluoroalkanesulfonamido quaternary ammonium dicarboxylate C, n=4       | <chem>S(N(CCC(O)=O)CCC[N+](CCC(O)=O)(C)C(=O)(=O)C(F)(F)C(F)(F)C(F)(F)C(F)(F)F</chem>                         | -7.51 | 0.63 | 2.83 | P | OUT |
| QL04446 | perfluoroalkanesulfonamido quaternary ammonium dicarboxylate C, n=3       | <chem>S(N(CCC(O)=O)CCC[N+](CCC(O)=O)(C)C(=O)(=O)C(F)(F)C(F)(F)C(F)(F)F</chem>                                | -7.01 | 0.63 | 2.67 | P | OUT |
| QL04447 | perfluorooctanesulfonamido amine carboxylic acid B, n=8                   | <chem>S(N(CCC(O)=O)CCCN(C)C(=O)(=O)C(F)(F)C(F)(F)C(F)(F)C(F)(F)C(F)(F)C(F)(F)C(F)(F)F</chem>                 | -8.30 | 0.65 | 2.95 | P | IN  |
| QL04448 | perfluoroheptanesulfonamido amine carboxylic acid B, n=7                  | <chem>S(N(CCC(O)=O)CCCN(C)C(=O)(=O)C(F)(F)C(F)(F)C(F)(F)C(F)(F)C(F)(F)C(F)(F)F</chem>                        | -8.10 | 0.65 | 2.90 | P | IN  |
| QL04449 | perfluorohexanesulfonamido amine carboxylic acid B, n=6                   | <chem>S(N(CCC(O)=O)CCCN(C)C(=O)(=O)C(F)(F)C(F)(F)C(F)(F)C(F)(F)C(F)(F)F</chem>                               | -7.68 | 0.64 | 2.75 | P | IN  |
| QL04450 | perfluoropentanesulfonamido amine carboxylic acid B, n=5                  | <chem>S(N(CCC(O)=O)CCCN(C)C(=O)(=O)C(F)(F)C(F)(F)C(F)(F)C(F)(F)F</chem>                                      | -7.43 | 0.64 | 2.70 | P | OUT |
| QL04451 | perfluorobutanesulfonamido amine carboxylic acid B, n=4                   | <chem>S(N(CCC(O)=O)CCCN(C)C(=O)(=O)C(F)(F)C(F)(F)C(F)(F)C(F)(F)F</chem>                                      | -6.91 | 0.63 | 2.52 | P | OUT |
| QL04452 | perfluoropropanesulfonamido amine carboxylic acid B, n=3                  | <chem>S(N(CCC(O)=O)CCCN(C)C(=O)(=O)C(F)(F)C(F)(F)C(F)(F)F</chem>                                             | -6.53 | 0.63 | 2.44 | P | OUT |
| QL04453 | perfluorohexanesulfonamido amine sulfonic acid, n=6                       | <chem>S(N(CCCS(=O)(O)=O)C(CO)CCN(C)C(=O)(=O)C(F)(F)C(F)(F)C(F)(F)C(F)(F)C(F)(F)F</chem>                      | -7.62 | 0.64 | 2.73 | P | IN  |
| QL04454 | perfluoropentanesulfonamido amine sulfonic acid, n=5                      | <chem>S(N(CCCS(=O)(O)=O)C(CO)CCN(C)C(=O)(=O)C(F)(F)C(F)(F)C(F)(F)C(F)(F)F</chem>                             | -7.36 | 0.64 | 2.67 | P | OUT |
| QL04455 | perfluoroalkanesulfonamido quaternary ammonium disulfonate A, n=8         | <chem>S(N(CCCS(=O)(O)=O)CCC[N+](CCCS(=O)(O)=O)(C)C(=O)(=O)C(F)(F)C(F)(F)C(F)(F)C(F)(F)C(F)(F)C(F)(F)F</chem> | -8.95 | 0.66 | 3.24 | P | OUT |
| QL04456 | perfluoroalkanesulfonamido quaternary ammonium disulfonate A, n=7         | <chem>S(N(CCCS(=O)(O)=O)CCC[N+](CCCS(=O)(O)=O)(C)C(=O)(=O)C(F)(F)C(F)(F)C(F)(F)C(F)(F)C(F)(F)F</chem>        | -8.77 | 0.65 | 3.18 | P | IN  |
| QL04457 | perfluoroalkanesulfonamido quaternary ammonium disulfonate A, n=6         | <chem>S(N(CCCS(=O)(O)=O)CCC[N+](CCCS(=O)(O)=O)(C)C(=O)(=O)C(F)(F)C(F)(F)C(F)(F)C(F)(F)C(F)(F)F</chem>        | -8.48 | 0.65 | 3.08 | P | IN  |
| QL04458 | perfluoroalkanesulfonamido quaternary ammonium disulfonate A, n=5         | <chem>S(N(CCCS(=O)(O)=O)CCC[N+](CCCS(=O)(O)=O)(C)C(=O)(=O)C(F)(F)C(F)(F)C(F)(F)C(F)(F)F</chem>               | -8.22 | 0.65 | 3.00 | P | OUT |
| QL04459 | perfluoroalkanesulfonamido quaternary ammonium disulfonate A, n=4         | <chem>S(N(CCCS(=O)(O)=O)CCC[N+](CCCS(=O)(O)=O)(C)C(=O)(=O)C(F)(F)C(F)(F)C(F)(F)C(F)(F)F</chem>               | -7.83 | 0.64 | 2.86 | P | OUT |
| QL04460 | perfluoroalkanesulfonamido quaternary ammonium disulfonate A, n=3         | <chem>S(N(CCCS(=O)(O)=O)CCC[N+](CCCS(=O)(O)=O)(C)C(=O)(=O)C(F)(F)C(F)(F)C(F)(F)F</chem>                      | -7.49 | 0.64 | 2.76 | P | OUT |
| QL04461 | perfluoroalkanesulfonamido quaternary ammonium triol sulfonic acid, n=6   | <chem>S(N(CCCS(O)(=O)=O)C(CO)CC[N+](CC(CO)O)(C)C(=O)(=O)C(F)(F)C(F)(F)C(F)(F)C(F)(F)C(F)(F)F</chem>          | -8.11 | 0.64 | 3.02 | P | OUT |
| QL04462 | perfluoroalkanesulfonamido quaternary ammonium triol sulfonic acid, n=5   | <chem>S(N(CCCS(O)(=O)=O)C(CO)CC[N+](CC(CO)O)(C)C(=O)(=O)C(F)(F)C(F)(F)C(F)(F)C(F)(F)F</chem>                 | -7.79 | 0.64 | 2.92 | P | OUT |
| QL04463 | perfluoroalkanesulfonamido quaternary ammonium triol sulfonic acid, n=4   | <chem>S(N(CCCS(O)(=O)=O)C(CO)CC[N+](CC(CO)O)(C)C(=O)(=O)C(F)(F)C(F)(F)C(F)(F)C(F)(F)F</chem>                 | -7.49 | 0.63 | 2.84 | P | OUT |
| QL04464 | perfluoroalkanesulfonamido quaternary ammonium triol sulfonic acid, n=3   | <chem>S(N(CCCS(O)(=O)=O)C(CO)CC[N+](CC(CO)O)(C)C(=O)(=O)C(F)(F)C(F)(F)C(F)(F)F</chem>                        | -7.05 | 0.63 | 2.70 | P | OUT |
| QL04465 | perfluoroalkanesulfonamido quaternary ammonium triol sulfonic acid, n=2   | <chem>S(N(CCCS(O)(=O)=O)C(CO)CC[N+](CC(CO)O)(C)C(=O)(=O)C(F)(F)C(F)(F)F</chem>                               | -6.88 | 0.62 | 2.71 | P | OUT |
| QL04466 | perfluoroalkanesulfonamido quaternary ammonium alcohol sulfonic acid, n=8 | <chem>S(N(CCCS(O)(=O)=O)CCC[N+](CCO)(C)C(=O)(=O)C(F)(F)C(F)(F)C(F)(F)C(F)(F)C(F)(F)C(F)(F)F</chem>           | -8.55 | 0.65 | 3.08 | P | IN  |
| QL04467 | perfluoroalkanesulfonamido quaternary ammonium alcohol sulfonic acid, n=7 | <chem>S(N(CCCS(O)(=O)=O)CCC[N+](CCO)(C)C(=O)(=O)C(F)(F)C(F)(F)C(F)(F)C(F)(F)C(F)(F)F</chem>                  | -8.37 | 0.65 | 3.04 | P | IN  |
| QL04468 | perfluoroalkanesulfonamido quaternary ammonium alcohol sulfonic acid, n=6 | <chem>S(N(CCCS(O)(=O)=O)CCC[N+](CCO)(C)C(=O)(=O)C(F)(F)C(F)(F)C(F)(F)C(F)(F)C(F)(F)F</chem>                  | -8.00 | 0.65 | 2.90 | P | IN  |
| QL04469 | perfluoroalkanesulfonamido quaternary ammonium alcohol sulfonic acid, n=5 | <chem>S(N(CCCS(O)(=O)=O)CCC[N+](CCO)(C)C(=O)(=O)C(F)(F)C(F)(F)C(F)(F)C(F)(F)F</chem>                         | -7.74 | 0.64 | 2.83 | P | OUT |
| QL04470 | perfluoroalkanesulfonamido quaternary ammonium alcohol sulfonic acid, n=4 | <chem>S(N(CCCS(O)(=O)=O)CCC[N+](CCO)(C)C(=O)(=O)C(F)(F)C(F)(F)C(F)(F)F</chem>                                | -7.33 | 0.64 | 2.70 | P | OUT |
| QL04471 | perfluoroalkanesulfonamido quaternary ammonium alcohol sulfonic acid, n=3 | <chem>S(N(CCCS(O)(=O)=O)CCC[N+](CCO)(C)C(=O)(=O)C(F)(F)C(F)(F)F</chem>                                       | -6.95 | 0.63 | 2.60 | P | OUT |

|         |                                                                           |            |                                                                                                   |       |      |      |   |     |
|---------|---------------------------------------------------------------------------|------------|---------------------------------------------------------------------------------------------------|-------|------|------|---|-----|
| QL04472 | perfluoroalkanesulfonamido quaternary ammonium alcohol sulfonic acid, n=2 |            | <chem>S(N(CCCS(O)(=O)=O)CCC[N+](CCO)(C)C(=O)(=O)C(F)(F)C(F)F)</chem>                              | -6.78 | 0.62 | 2.62 | P | OUT |
| QL04473 | perfluoroalkanesulfonamido sulfonate betaine E, n=6                       |            | <chem>S(N(CCO)CCC[N+](CC(O)CS(=O)(O)=O)(C)C(=O)(=O)C(F)(F)C(F)(F)C(F)(F)C(F)(F)C(F)(F)F)</chem>   | -8.41 | 0.65 | 3.11 | P | OUT |
| QL04474 | perfluoroalkanesulfonamido sulfonate betaine E, n=5                       |            | <chem>S(N(CCO)CCC[N+](CC(O)CS(=O)(O)=O)(C)C(=O)(=O)C(F)(F)C(F)(F)C(F)(F)C(F)(F)C(F)(F)F)</chem>   | -8.11 | 0.64 | 3.02 | P | OUT |
| QL04475 | perfluoroalkanesulfonamido sulfonate betaine E, n=4                       |            | <chem>S(N(CCO)CCC[N+](CC(O)CS(=O)(O)=O)(C)C(=O)(=O)C(F)(F)C(F)(F)C(F)(F)C(F)(F)F)</chem>          | -7.70 | 0.64 | 2.88 | P | OUT |
| QL04476 | perfluoroalkanesulfonamido sulfonate betaine E, n=3                       |            | <chem>S(N(CCO)CCC[N+](CC(O)CS(=O)(O)=O)(C)C(=O)(=O)C(F)(F)C(F)(F)C(F)(F)F)</chem>                 | -7.41 | 0.63 | 2.82 | P | OUT |
| QL04477 | perfluoroalkanesulfonamido quaternary ammonium diol B, n=8                |            | <chem>S(N(CCO)CCC[N+](CCO)(C)C(=O)(=O)C(F)(F)C(F)(F)C(F)(F)C(F)(F)C(F)(F)C(F)(F)C(F)(F)F)</chem>  | -8.50 | 0.65 | 3.12 | P | OUT |
| QL04478 | perfluoroalkanesulfonamido quaternary ammonium diol B, n=7                |            | <chem>S(N(CCO)CCC[N+](CCO)(C)C(=O)(=O)C(F)(F)C(F)(F)C(F)(F)C(F)(F)C(F)(F)C(F)(F)F)</chem>         | -8.32 | 0.64 | 3.08 | P | OUT |
| QL04479 | perfluoroalkanesulfonamido quaternary ammonium diol B, n=6                |            | <chem>S(N(CCO)CCC[N+](CCO)(C)C(=O)(=O)C(F)(F)C(F)(F)C(F)(F)C(F)(F)C(F)(F)F)</chem>                | -7.93 | 0.64 | 2.95 | P | OUT |
| QL04480 | perfluoroalkanesulfonamido quaternary ammonium diol B, n=5                |            | <chem>S(N(CCO)CCC[N+](CCO)(C)C(=O)(=O)C(F)(F)C(F)(F)C(F)(F)C(F)(F)C(F)(F)F)</chem>                | -7.66 | 0.63 | 2.89 | P | OUT |
| QL04481 | perfluoroalkanesulfonamido quaternary ammonium diol B, n=4                |            | <chem>S(N(CCO)CCC[N+](CCO)(C)C(=O)(=O)C(F)(F)C(F)(F)C(F)(F)C(F)(F)F)</chem>                       | -7.17 | 0.63 | 2.74 | P | OUT |
| QL04482 | perfluoroalkanesulfonamido quaternary ammonium diol B, n=3                |            | <chem>S(N(CCO)CCC[N+](CCO)(C)C(=O)(=O)C(F)(F)C(F)(F)C(F)(F)F)</chem>                              | -6.72 | 0.62 | 2.62 | P | OUT |
| QL04483 | perfluoroalkanesulfonamido quaternary ammonium diol B, n=2                |            | <chem>S(N(CCO)CCC[N+](CCO)(C)C(=O)(=O)C(F)(F)C(F)(F)F)</chem>                                     | -6.06 | 0.61 | 2.44 | P | OUT |
| QL04484 | perfluorohexanesulfonamido amine carboxylic acid A, n=6                   |            | <chem>S(NC(C(O)=O)CCN(C)C(=O)(=O)C(F)(F)C(F)(F)C(F)(F)C(F)(F)C(F)(F)F)</chem>                     | -7.96 | 0.66 | 2.74 | P | IN  |
| QL04485 | perfluoropentanesulfonamido amine carboxylic acid A, n=5                  |            | <chem>S(NC(C(O)=O)CCN(C)C(=O)(=O)C(F)(F)C(F)(F)C(F)(F)C(F)(F)F)</chem>                            | -7.74 | 0.65 | 2.69 | P | IN  |
| QL04486 | perfluorobutanesulfonamido amine carboxylic acid A, n=4                   |            | <chem>S(NC(C(O)=O)CCN(C)C(=O)(=O)C(F)(F)C(F)(F)C(F)(F)F)</chem>                                   | -7.24 | 0.65 | 2.52 | P | IN  |
| QL04487 | perfluoroalkanesulfonamido quaternary ammonium triol, n=6                 |            | <chem>S(NC(CO)CC[N+](CC(O)CO)(C)C(=O)(=O)C(F)(F)C(F)(F)C(F)(F)C(F)(F)C(F)(F)F)</chem>             | -8.31 | 0.65 | 3.05 | P | OUT |
| QL04488 | perfluoroalkanesulfonamido quaternary ammonium triol, n=5                 |            | <chem>S(NC(CO)CC[N+](CC(O)CO)(C)C(=O)(=O)C(F)(F)C(F)(F)C(F)(F)C(F)(F)F)</chem>                    | -7.96 | 0.64 | 2.94 | P | OUT |
| QL04489 | perfluoroalkanesulfonamido quaternary ammonium triol, n=4                 |            | <chem>S(NC(CO)CC[N+](CC(O)CO)(C)C(=O)(=O)C(F)(F)C(F)(F)C(F)(F)F)</chem>                           | -7.70 | 0.64 | 2.89 | P | OUT |
| QL04490 | perfluoroalkanesulfonamido quaternary ammonium triol, n=3                 |            | <chem>S(NC(CO)CC[N+](CC(O)CO)(C)C(=O)(=O)C(F)(F)C(F)(F)F)</chem>                                  | -7.20 | 0.63 | 2.73 | P | OUT |
| QL04491 | perfluoroalkanesulfonamido quaternary ammonium diol A, n=6                |            | <chem>S(NCC(O)C[N+](CCO)(C)C(=O)(=O)C(F)(F)C(F)(F)C(F)(F)C(F)(F)C(F)(F)F)</chem>                  | -8.31 | 0.65 | 2.95 | P | IN  |
| QL04492 | perfluoroalkanesulfonamido quaternary ammonium diol A, n=5                |            | <chem>S(NCC(O)C[N+](CCO)(C)C(=O)(=O)C(F)(F)C(F)(F)C(F)(F)C(F)(F)F)</chem>                         | -8.02 | 0.65 | 2.87 | P | IN  |
| QL04493 | perfluoroalkanesulfonamido quaternary ammonium diol A, n=4                |            | <chem>S(NCC(O)C[N+](CCO)(C)C(=O)(=O)C(F)(F)C(F)(F)C(F)(F)F)</chem>                                | -7.56 | 0.64 | 2.71 | P | IN  |
| QL04494 | perfluoroalkanesulfonamido quaternary ammonium oxide, n=9                 |            | <chem>S(NCCC[N+](([O-])(C)C(=O)(=O)C(F)(F)C(F)(F)C(F)(F)C(F)(F)C(F)(F)C(F)(F)C(F)(F)F)</chem>     | -9.09 | 0.67 | 3.07 | P | OUT |
| QL04495 | perfluoroalkanesulfonamido quaternary ammonium oxide, n=7                 |            | <chem>S(NCCC[N+](([O-])(C)C(=O)(=O)C(F)(F)C(F)(F)C(F)(F)C(F)(F)C(F)(F)F)</chem>                   | -8.61 | 0.67 | 2.89 | P | IN  |
| QL04496 | perfluoroalkanesulfonamido quaternary ammonium oxide, n=6                 | 30295-56-8 | <chem>S(NCCC[N+](([O-])(C)C(=O)(=O)C(F)(F)C(F)(F)C(F)(F)C(F)(F)F)</chem>                          | -8.23 | 0.67 | 2.74 | P | IN  |
| QL04497 | perfluoroalkanesulfonamido quaternary ammonium oxide, n=5                 |            | <chem>S(NCCC[N+](([O-])(C)C(=O)(=O)C(F)(F)C(F)(F)C(F)(F)F)</chem>                                 | -8.04 | 0.66 | 2.70 | P | IN  |
| QL04498 | perfluoroalkanesulfonamido quaternary ammonium oxide, n=4                 |            | <chem>S(NCCC[N+](([O-])(C)C(=O)(=O)C(F)(F)C(F)(F)C(F)(F)F)</chem>                                 | -7.56 | 0.66 | 2.52 | P | IN  |
| QL04499 | perfluoroalkanesulfonamido quaternary ammonium, n=3                       |            | <chem>S(NCCC[N+](C)(C)C(=O)(=O)C(F)(F)C(F)(F)F)</chem>                                            | -7.18 | 0.65 | 2.42 | P | IN  |
| QL04500 | perfluoroalkanesulfonamido betaine A, n=6                                 |            | <chem>S(NCCC[N+](CC(O)=O)(C)C(=O)(=O)C(F)(F)C(F)(F)C(F)(F)C(F)(F)C(F)(F)F)</chem>                 | -8.37 | 0.66 | 2.95 | P | IN  |
| QL04501 | perfluoroalkanesulfonamido betaine A, n=5                                 |            | <chem>S(NCCC[N+](CC(O)=O)(C)C(=O)(=O)C(F)(F)C(F)(F)C(F)(F)C(F)(F)F)</chem>                        | -8.10 | 0.65 | 2.87 | P | IN  |
| QL04502 | perfluoroalkanesulfonamido betaine A, n=4                                 |            | <chem>S(NCCC[N+](CC(O)=O)(C)C(=O)(=O)C(F)(F)C(F)(F)C(F)(F)F)</chem>                               | -7.64 | 0.65 | 2.71 | P | IN  |
| QL04503 | perfluoroalkanesulfonamido betaine A, n=3                                 |            | <chem>S(NCCC[N+](CC(O)=O)(C)C(=O)(=O)C(F)(F)C(F)(F)F)</chem>                                      | -7.28 | 0.64 | 2.62 | P | IN  |
| QL04504 | perfluoroalkanesulfonamido sulfonate betaine B, n=9                       |            | <chem>S(NCCC[N+](CC(O)CS(=O)(O)=O)(C)C(=O)(=O)C(F)(F)C(F)(F)C(F)(F)C(F)(F)C(F)(F)C(F)(F)F)</chem> | -9.47 | 0.67 | 3.38 | P | OUT |

|         |                                                             |                                                                                      |       |      |      |   |     |
|---------|-------------------------------------------------------------|--------------------------------------------------------------------------------------|-------|------|------|---|-----|
| QL04505 | perfluoroalkanesulfonamido sulfonate betaine B, n=8         | S(NCCC[N+](CC(O)CS(=O)(O)=O)(C)C)(=O)(=O)C(F)(F)C(F)(F)C(F)(F)C(F)(F)C(F)(F)C(F)(F)F | -9.19 | 0.66 | 3.27 | P | OUT |
| QL04506 | perfluoroalkanesulfonamido sulfonate betaine B, n=7         | S(NCCC[N+](CC(O)CS(=O)(O)=O)(C)C)(=O)(=O)C(F)(F)C(F)(F)C(F)(F)C(F)(F)C(F)(F)C(F)(F)F | -8.98 | 0.66 | 3.21 | P | OUT |
| QL04507 | perfluoroalkanesulfonamido sulfonate betaine B, n=6         | S(NCCC[N+](CC(O)CS(=O)(O)=O)(C)C)(=O)(=O)C(F)(F)C(F)(F)C(F)(F)C(F)(F)C(F)(F)F        | -8.66 | 0.66 | 3.08 | P | IN  |
| QL04508 | perfluoroalkanesulfonamido sulfonate betaine B, n=5         | S(NCCC[N+](CC(O)CS(=O)(O)=O)(C)C)(=O)(=O)C(F)(F)C(F)(F)C(F)(F)C(F)(F)C(F)(F)F        | -8.41 | 0.65 | 3.01 | P | IN  |
| QL04509 | perfluoroalkanesulfonamido sulfonate betaine B, n=4         | S(NCCC[N+](CC(O)CS(=O)(O)=O)(C)C)(=O)(=O)C(F)(F)C(F)(F)C(F)(F)C(F)(F)F               | -8.00 | 0.65 | 2.87 | P | IN  |
| QL04510 | perfluoroalkanesulfonamido sulfonate betaine B, n=3         | S(NCCC[N+](CC(O)CS(=O)(O)=O)(C)C)(=O)(=O)C(F)(F)C(F)(F)C(F)(F)F                      | -7.79 | 0.64 | 2.84 | P | OUT |
| QL04511 | perfluoroalkanesulfonamido betaine B, n=6                   | S(NCCC[N+](CCC(O)=O)(C)C)(=O)(=O)C(F)(F)C(F)(F)C(F)(F)C(F)(F)C(F)(F)F                | -8.50 | 0.65 | 3.05 | P | IN  |
| QL04512 | perfluoroalkanesulfonamido betaine B, n=5                   | S(NCCC[N+](CCC(O)=O)(C)C)(=O)(=O)C(F)(F)C(F)(F)C(F)(F)C(F)(F)C(F)(F)F                | -8.10 | 0.65 | 2.92 | P | IN  |
| QL04513 | perfluoroalkanesulfonamido betaine B, n=4                   | S(NCCC[N+](CCC(O)=O)(C)C)(=O)(=O)C(F)(F)C(F)(F)C(F)(F)C(F)(F)F                       | -7.80 | 0.64 | 2.84 | P | OUT |
| QL04514 | perfluoroalkanesulfonamido betaine B, n=3                   | S(NCCC[N+](CCC(O)=O)(C)C)(=O)(=O)C(F)(F)C(F)(F)C(F)(F)F                              | -7.29 | 0.64 | 2.68 | P | OUT |
| QL04515 | perfluoroalkanesulfonamido quaternary ammonium diol C, n=6  | S(NCCC[N+](CCC(O)CO)(C)C)(=O)(=O)C(F)(F)C(F)(F)C(F)(F)C(F)(F)C(F)(F)F                | -8.45 | 0.65 | 3.10 | P | OUT |
| QL04516 | perfluoroalkanesulfonamido quaternary ammonium diol C, n=5  | S(NCCC[N+](CCC(O)CO)(C)C)(=O)(=O)C(F)(F)C(F)(F)C(F)(F)C(F)(F)F                       | -8.18 | 0.64 | 3.03 | P | OUT |
| QL04517 | perfluoroalkanesulfonamido quaternary ammonium diol C, n=4  | S(NCCC[N+](CCC(O)CO)(C)C)(=O)(=O)C(F)(F)C(F)(F)C(F)(F)F                              | -7.74 | 0.64 | 2.89 | P | OUT |
| QL04518 | perfluoroalkanesulfonamido sulfonate betaine A, n=8         | S(NCCC[N+](CCCS(=O)(O)=O)(C)C)(=O)(=O)C(F)(F)C(F)(F)C(F)(F)C(F)(F)C(F)(F)C(F)(F)F    | -9.19 | 0.66 | 3.27 | P | OUT |
| QL04519 | perfluoroalkanesulfonamido sulfonate betaine A, n=7         | S(NCCC[N+](CCCS(=O)(O)=O)(C)C)(=O)(=O)C(F)(F)C(F)(F)C(F)(F)C(F)(F)C(F)(F)C(F)(F)F    | -8.99 | 0.66 | 3.21 | P | OUT |
| QL04520 | perfluoroalkanesulfonamido sulfonate betaine A, n=6         | S(NCCC[N+](CCCS(=O)(O)=O)(C)C)(=O)(=O)C(F)(F)C(F)(F)C(F)(F)C(F)(F)C(F)(F)F           | -8.66 | 0.66 | 3.09 | P | IN  |
| QL04521 | perfluoroalkanesulfonamido sulfonate betaine A, n=5         | S(NCCC[N+](CCCS(=O)(O)=O)(C)C)(=O)(=O)C(F)(F)C(F)(F)C(F)(F)C(F)(F)F                  | -8.40 | 0.65 | 3.01 | P | IN  |
| QL04522 | perfluoroalkanesulfonamido sulfonate betaine A, n=4         | S(NCCC[N+](CCCS(=O)(O)=O)(C)C)(=O)(=O)C(F)(F)C(F)(F)C(F)(F)F                         | -8.00 | 0.65 | 2.87 | P | IN  |
| QL04523 | perfluoroalkanesulfonamido sulfonate betaine A, n=3         | S(NCCC[N+](CCCS(=O)(O)=O)(C)C)(=O)(=O)C(F)(F)C(F)(F)F                                | -7.79 | 0.64 | 2.85 | P | OUT |
| QL04524 | perfluoroalkanesulfonamido sulfonate betaine C, n=6         | S(NCCC[N+](CCCS(=O)(O)=O)(C)CCO)(=O)(=O)C(F)(F)C(F)(F)C(F)(F)C(F)(F)C(F)(F)F         | -8.31 | 0.64 | 3.08 | P | OUT |
| QL04525 | perfluoroalkanesulfonamido sulfonate betaine C, n=5         | S(NCCC[N+](CCCS(=O)(O)=O)(C)CCO)(=O)(=O)C(F)(F)C(F)(F)C(F)(F)C(F)(F)F                | -8.03 | 0.64 | 3.01 | P | OUT |
| QL04526 | perfluoroalkanesulfonamido sulfonate betaine C, n=4         | S(NCCC[N+](CCCS(=O)(O)=O)(C)CCO)(=O)(=O)C(F)(F)C(F)(F)C(F)(F)F                       | -7.60 | 0.63 | 2.87 | P | OUT |
| QL04527 | perfluoroalkanesulfonamido quaternary ammonium alcohol, n=8 | S(NCCC[N+](CCO)(C)C)(=O)(=O)C(F)(F)C(F)(F)C(F)(F)C(F)(F)C(F)(F)C(F)(F)F              | -8.79 | 0.66 | 3.12 | P | OUT |
| QL04528 | perfluoroalkanesulfonamido quaternary ammonium alcohol, n=7 | S(NCCC[N+](CCO)(C)C)(=O)(=O)C(F)(F)C(F)(F)C(F)(F)C(F)(F)C(F)(F)C(F)(F)F              | -8.63 | 0.66 | 3.09 | P | IN  |
| QL04529 | perfluoroalkanesulfonamido quaternary ammonium alcohol, n=6 | S(NCCC[N+](CCO)(C)C)(=O)(=O)C(F)(F)C(F)(F)C(F)(F)C(F)(F)C(F)(F)F                     | -8.26 | 0.65 | 2.95 | P | IN  |
| QL04530 | perfluoroalkanesulfonamido quaternary ammonium alcohol, n=5 | S(NCCC[N+](CCO)(C)C)(=O)(=O)C(F)(F)C(F)(F)C(F)(F)C(F)(F)F                            | -7.97 | 0.65 | 2.87 | P | IN  |
| QL04531 | perfluoroalkanesulfonamido quaternary ammonium alcohol, n=4 | S(NCCC[N+](CCO)(C)C)(=O)(=O)C(F)(F)C(F)(F)C(F)(F)F                                   | -7.49 | 0.64 | 2.72 | P | OUT |
| QL04532 | perfluoroalkanesulfonamido quaternary ammonium alcohol, n=3 | S(NCCC[N+](CCO)(C)C)(=O)(=O)C(F)(F)C(F)(F)F                                          | -7.11 | 0.63 | 2.63 | P | OUT |
| QL04533 | perfluoroalkanesulfonamido quaternary ammonium alcohol, n=2 | S(NCCC[N+](CCO)(C)C)(=O)(=O)C(F)(F)C(F)(F)F                                          | -6.46 | 0.62 | 2.45 | P | OUT |
| QL04534 | perfluoropropanesulfonamido amine, n=3                      | S(NCCCN(C)C)(=O)(=O)C(F)(F)C(F)(F)F                                                  | -6.85 | 0.64 | 2.44 | P | IN  |
| QL04535 | perfluoropropanesulfonamido sulfonic acid, n=6              | S(NCCCS(=O)(O)=O)(=O)(=O)C(F)(F)C(F)(F)C(F)(F)C(F)(F)C(F)(F)F                        | -8.23 | 0.67 | 2.74 | P | IN  |
| QL04536 | perfluoropropanesulfonamido sulfonic acid, n=5              | S(NCCCS(=O)(O)=O)(=O)(=O)C(F)(F)C(F)(F)C(F)(F)C(F)(F)F                               | -8.04 | 0.66 | 2.70 | P | IN  |
| QL04537 | perfluoropropanesulfonamido sulfonic acid, n=4              | S(NCCCS(=O)(O)=O)(=O)(=O)C(F)(F)C(F)(F)C(F)(F)F                                      | -7.56 | 0.66 | 2.52 | P | IN  |
| QL04538 | perfluoropropanesulfonamido sulfonic acid, n=3              | S(NCCCS(=O)(O)=O)(=O)(=O)C(F)(F)C(F)(F)F                                             | -7.18 | 0.65 | 2.42 | P | IN  |
