# Supplementary material for: How the Structure of Per- and Polyfluoroalkyl Substances (PFAS) Influences Their Binding Potency to the Peroxisome Proliferator-Activated and Thyroid Hormone Receptors—An In Silico Screening Study
Source: MDPI journal article supplement (doi:10.3390/molecules28020479), 2023-01-04
Supplement: s1 [file s1]

| Model information       |                                                                                           |
|-------------------------|-------------------------------------------------------------------------------------------|
| Type of model           | MLR                                                                                       |
| Data split              | 3:1                                                                                       |
| Descriptors             | X%, TPC                                                                                   |
| Descriptors correlation | 0.47                                                                                      |
| Preprocessing           | Standard scaler - Standardize features by removing the mean and scaling to unit variance. |
| Model equation          | $TR\beta\ BS=-8,724(\pm0,054) -0,137(\pm0,061) \times X\%-1,509(\pm0,061) \times TPC$     |

| Model statistics                              |       |
|-----------------------------------------------|-------|
| R <sup>2</sup>                                | 0.97  |
| RMSE <sub>C</sub>                             | 0.276 |
| MAE <sub>C</sub>                              | 0.221 |
| Q <sup>2</sup> <sub>LOO</sub>                 | 0.955 |
| R <sup>2</sup> -Q <sup>2</sup> <sub>LOO</sub> | 0.015 |
| RMSE <sub>CV</sub>                            | 0.340 |
| MAE <sub>CV</sub>                             | 0.256 |
| CCC <sub>CV</sub>                             | 0.978 |
| Q <sup>2</sup> <sub>F1</sub>                  | 0.948 |
| Q <sup>2</sup> <sub>F2</sub>                  | 0.947 |
| Q <sup>2</sup> <sub>F3</sub>                  | 0.954 |
| RMSE <sub>EXT</sub>                           | 0.344 |
| MAE <sub>EXT</sub>                            | 0.280 |
| CCC <sub>EXT</sub>                            | 0.973 |
| R <sup>2</sup> <sub>YSCR</sub>                | 0,070 |

|                           |       |
|---------------------------|-------|
| MIN binding score (pred.) | -10.5 |
| MAX binding score (pred.) | -3.58 |
| HAT kryt.                 | 0.31  |



[illegible]



[illegible]



[illegible]



[illegible]



[illegible]







[illegible]



[illegible]



[illegible]



[illegible]



[illegible]











[illegible]



|         |                                                              |            |                                                                                                                                                                                                                                                                                                                                                                                                                                                                                                                                                                                                                                                                                                                                                                                                                                                                                                                                                                                                                                                                                                                                                                                                                                                                                                                                                                                                                                                                                                                                                                                                                                                                                                                                                                                                                                                                                                                                                                                                                                                                                                                                                                                                                                                                                                                                                                                                                                                                                                                                                                                                                                                                                                                                                                                                                                                                                                                                                                                                                                                                                                                                                                                                                                                                                                                                                                                                                                                                                                                                                                                                                                                                                                                                                                                                                                                                                                                                                                                                                                                                                                                                                                                                                                                                                                                                                                                                                                                                                                                                                                                                                                                                                                                                                                                                                                                                                                                                                                                                                                                                                                                                                                                                                                                                                                                                                                                                                                                                                                                                |        |       |      |   |     |
|---------|--------------------------------------------------------------|------------|--------------------------------------------------------------------------------------------------------------------------------------------------------------------------------------------------------------------------------------------------------------------------------------------------------------------------------------------------------------------------------------------------------------------------------------------------------------------------------------------------------------------------------------------------------------------------------------------------------------------------------------------------------------------------------------------------------------------------------------------------------------------------------------------------------------------------------------------------------------------------------------------------------------------------------------------------------------------------------------------------------------------------------------------------------------------------------------------------------------------------------------------------------------------------------------------------------------------------------------------------------------------------------------------------------------------------------------------------------------------------------------------------------------------------------------------------------------------------------------------------------------------------------------------------------------------------------------------------------------------------------------------------------------------------------------------------------------------------------------------------------------------------------------------------------------------------------------------------------------------------------------------------------------------------------------------------------------------------------------------------------------------------------------------------------------------------------------------------------------------------------------------------------------------------------------------------------------------------------------------------------------------------------------------------------------------------------------------------------------------------------------------------------------------------------------------------------------------------------------------------------------------------------------------------------------------------------------------------------------------------------------------------------------------------------------------------------------------------------------------------------------------------------------------------------------------------------------------------------------------------------------------------------------------------------------------------------------------------------------------------------------------------------------------------------------------------------------------------------------------------------------------------------------------------------------------------------------------------------------------------------------------------------------------------------------------------------------------------------------------------------------------------------------------------------------------------------------------------------------------------------------------------------------------------------------------------------------------------------------------------------------------------------------------------------------------------------------------------------------------------------------------------------------------------------------------------------------------------------------------------------------------------------------------------------------------------------------------------------------------------------------------------------------------------------------------------------------------------------------------------------------------------------------------------------------------------------------------------------------------------------------------------------------------------------------------------------------------------------------------------------------------------------------------------------------------------------------------------------------------------------------------------------------------------------------------------------------------------------------------------------------------------------------------------------------------------------------------------------------------------------------------------------------------------------------------------------------------------------------------------------------------------------------------------------------------------------------------------------------------------------------------------------------------------------------------------------------------------------------------------------------------------------------------------------------------------------------------------------------------------------------------------------------------------------------------------------------------------------------------------------------------------------------------------------------------------------------------------------------------------------------------------------|--------|-------|------|---|-----|
| QL00662 | N-Allylperfluorobutanesulfonamide                            | 40630-65-7 | C[N]([S](=[O])=O)C(F)(F)C(F)(F)C(F)(F)F)C=C                                                                                                                                                                                                                                                                                                                                                                                                                                                                                                                                                                                                                                                                                                                                                                                                                                                                                                                                                                                                                                                                                                                                                                                                                                                                                                                                                                                                                                                                                                                                                                                                                                                                                                                                                                                                                                                                                                                                                                                                                                                                                                                                                                                                                                                                                                                                                                                                                                                                                                                                                                                                                                                                                                                                                                                                                                                                                                                                                                                                                                                                                                                                                                                                                                                                                                                                                                                                                                                                                                                                                                                                                                                                                                                                                                                                                                                                                                                                                                                                                                                                                                                                                                                                                                                                                                                                                                                                                                                                                                                                                                                                                                                                                                                                                                                                                                                                                                                                                                                                                                                                                                                                                                                                                                                                                                                                                                                                                                                                                    | -7.76  | 34.62 | 5.35 | P | IN  |
| QL00663 | 3-(Perfluoroheptyl)sulfonylamino)-N,N,N-trimethyl-1-propan:  | 67584-58-1 | C[N]([S](C(C(C(C(C(C(F)F)F)F)F)F)F)F)F)F(=O)=O)CC[N+](C)(C)C.[I-]                                                                                                                                                                                                                                                                                                                                                                                                                                                                                                                                                                                                                                                                                                                                                                                                                                                                                                                                                                                                                                                                                                                                                                                                                                                                                                                                                                                                                                                                                                                                                                                                                                                                                                                                                                                                                                                                                                                                                                                                                                                                                                                                                                                                                                                                                                                                                                                                                                                                                                                                                                                                                                                                                                                                                                                                                                                                                                                                                                                                                                                                                                                                                                                                                                                                                                                                                                                                                                                                                                                                                                                                                                                                                                                                                                                                                                                                                                                                                                                                                                                                                                                                                                                                                                                                                                                                                                                                                                                                                                                                                                                                                                                                                                                                                                                                                                                                                                                                                                                                                                                                                                                                                                                                                                                                                                                                                                                                                                                              | -9.80  | 32.00 | 6.33 | P | OUT |
| QL00664 | 3-(Perfluorohexylsulfonylamino)-N,N,N-trimethyl-1-propana    | 68957-58-4 | C[N]([S](C(C(C(C(C(F)F)F)F)F)F)F)F)F(=O)=O)CC[N+](C)(C)C.[I-]                                                                                                                                                                                                                                                                                                                                                                                                                                                                                                                                                                                                                                                                                                                                                                                                                                                                                                                                                                                                                                                                                                                                                                                                                                                                                                                                                                                                                                                                                                                                                                                                                                                                                                                                                                                                                                                                                                                                                                                                                                                                                                                                                                                                                                                                                                                                                                                                                                                                                                                                                                                                                                                                                                                                                                                                                                                                                                                                                                                                                                                                                                                                                                                                                                                                                                                                                                                                                                                                                                                                                                                                                                                                                                                                                                                                                                                                                                                                                                                                                                                                                                                                                                                                                                                                                                                                                                                                                                                                                                                                                                                                                                                                                                                                                                                                                                                                                                                                                                                                                                                                                                                                                                                                                                                                                                                                                                                                                                                                  | -9.35  | 29.79 | 6.15 | P | OUT |
| QL00665 | 3-(Perfluoropentylsulfonylamino)-N,N,N-trimethylpropanam     | 68957-55-1 | C[N]([S](C(C(C(C(C(F)F)F)F)F)F)F)F)F(=O)=O)CC[N+](C)(C)C.[Cl-]                                                                                                                                                                                                                                                                                                                                                                                                                                                                                                                                                                                                                                                                                                                                                                                                                                                                                                                                                                                                                                                                                                                                                                                                                                                                                                                                                                                                                                                                                                                                                                                                                                                                                                                                                                                                                                                                                                                                                                                                                                                                                                                                                                                                                                                                                                                                                                                                                                                                                                                                                                                                                                                                                                                                                                                                                                                                                                                                                                                                                                                                                                                                                                                                                                                                                                                                                                                                                                                                                                                                                                                                                                                                                                                                                                                                                                                                                                                                                                                                                                                                                                                                                                                                                                                                                                                                                                                                                                                                                                                                                                                                                                                                                                                                                                                                                                                                                                                                                                                                                                                                                                                                                                                                                                                                                                                                                                                                                                                                 | -8.86  | 27.27 | 5.94 | P | OUT |
| QL00666 | Trimethyl-3-(perfluorobutylsulphonylamino)propylammoniu      | 53518-00-6 | C[N]([S](C(C(C(F)F)F)F)F)F)F(=O)=O)CC[N+](C)(C)C.[Cl-]                                                                                                                                                                                                                                                                                                                                                                                                                                                                                                                                                                                                                                                                                                                                                                                                                                                                                                                                                                                                                                                                                                                                                                                                                                                                                                                                                                                                                                                                                                                                                                                                                                                                                                                                                                                                                                                                                                                                                                                                                                                                                                                                                                                                                                                                                                                                                                                                                                                                                                                                                                                                                                                                                                                                                                                                                                                                                                                                                                                                                                                                                                                                                                                                                                                                                                                                                                                                                                                                                                                                                                                                                                                                                                                                                                                                                                                                                                                                                                                                                                                                                                                                                                                                                                                                                                                                                                                                                                                                                                                                                                                                                                                                                                                                                                                                                                                                                                                                                                                                                                                                                                                                                                                                                                                                                                                                                                                                                                                                         | -8.31  | 24.39 | 5.71 | P | OUT |
| QL00667 | S-(3-(Ethoxycarbonylaminomethyl)-3-(perfluorohexyl)propyl)s  | 67846-66-6 | C(NC(OCC)=O)C(C(F)(F)C(F)F)C(F)(F)C(F)(F)C(F)F)CCS([O])([O])=O.[K+]                                                                                                                                                                                                                                                                                                                                                                                                                                                                                                                                                                                                                                                                                                                                                                                                                                                                                                                                                                                                                                                                                                                                                                                                                                                                                                                                                                                                                                                                                                                                                                                                                                                                                                                                                                                                                                                                                                                                                                                                                                                                                                                                                                                                                                                                                                                                                                                                                                                                                                                                                                                                                                                                                                                                                                                                                                                                                                                                                                                                                                                                                                                                                                                                                                                                                                                                                                                                                                                                                                                                                                                                                                                                                                                                                                                                                                                                                                                                                                                                                                                                                                                                                                                                                                                                                                                                                                                                                                                                                                                                                                                                                                                                                                                                                                                                                                                                                                                                                                                                                                                                                                                                                                                                                                                                                                                                                                                                                                                            | -9.82  | 27.08 | 6.39 | P | OUT |
| QL00668 | perfluoroalkylamido betaine-related, n=14_pos                |            | (CNCCC[N+](CC(O)=O)(C)C(=O)C(F)(F)C(F)F)C(F)(F)C(F)F)C(F)(F)C(F)F)C(F)(F)C(F)F)C(F)(F)C(F)F)C(F)(F)C(F)F)C(F)(F)C(F)F)                                                                                                                                                                                                                                                                                                                                                                                                                                                                                                                                                                                                                                                                                                                                                                                                                                                                                                                                                                                                                                                                                                                                                                                                                                                                                                                                                                                                                                                                                                                                                                                                                                                                                                                                                                                                                                                                                                                                                                                                                                                                                                                                                                                                                                                                                                                                                                                                                                                                                                                                                                                                                                                                                                                                                                                                                                                                                                                                                                                                                                                                                                                                                                                                                                                                                                                                                                                                                                                                                                                                                                                                                                                                                                                                                                                                                                                                                                                                                                                                                                                                                                                                                                                                                                                                                                                                                                                                                                                                                                                                                                                                                                                                                                                                                                                                                                                                                                                                                                                                                                                                                                                                                                                                                                                                                                                                                                                                         | -12.20 | 40.28 | 7.38 | P | OUT |
| QL00669 | perfluoroalkylamido betaine-related, n=13_pos                |            | (CNCCC[N+](CC(O)=O)(C)C(=O)C(F)(F)C(F)F)C(F)(F)C(F)F)C(F)(F)C(F)F)C(F)(F)C(F)F)C(F)(F)C(F)F)C(F)(F)C(F)F)C(F)(F)C(F)F)                                                                                                                                                                                                                                                                                                                                                                                                                                                                                                                                                                                                                                                                                                                                                                                                                                                                                                                                                                                                                                                                                                                                                                                                                                                                                                                                                                                                                                                                                                                                                                                                                                                                                                                                                                                                                                                                                                                                                                                                                                                                                                                                                                                                                                                                                                                                                                                                                                                                                                                                                                                                                                                                                                                                                                                                                                                                                                                                                                                                                                                                                                                                                                                                                                                                                                                                                                                                                                                                                                                                                                                                                                                                                                                                                                                                                                                                                                                                                                                                                                                                                                                                                                                                                                                                                                                                                                                                                                                                                                                                                                                                                                                                                                                                                                                                                                                                                                                                                                                                                                                                                                                                                                                                                                                                                                                                                                                                         | -11.94 | 39.13 | 7.27 | P | OUT |
| QL00670 | perfluoroalkylamido betaine-related, n=12                    |            | (CNCCC[N+](CC(O)=O)(C)C(=O)C(F)(F)C(F)F)C(F)(F)C(F)F)C(F)(F)C(F)F)C(F)(F)C(F)F)C(F)(F)C(F)F)C(F)(F)C(F)F)C(F)(F)C(F)F)                                                                                                                                                                                                                                                                                                                                                                                                                                                                                                                                                                                                                                                                                                                                                                                                                                                                                                                                                                                                                                                                                                                                                                                                                                                                                                                                                                                                                                                                                                                                                                                                                                                                                                                                                                                                                                                                                                                                                                                                                                                                                                                                                                                                                                                                                                                                                                                                                                                                                                                                                                                                                                                                                                                                                                                                                                                                                                                                                                                                                                                                                                                                                                                                                                                                                                                                                                                                                                                                                                                                                                                                                                                                                                                                                                                                                                                                                                                                                                                                                                                                                                                                                                                                                                                                                                                                                                                                                                                                                                                                                                                                                                                                                                                                                                                                                                                                                                                                                                                                                                                                                                                                                                                                                                                                                                                                                                                                         | -11.67 | 37.88 | 7.15 | P | OUT |
| QL00671 | perfluoroalkylamido betaine-related, n=11_pos                |            | (CNCCC[N+](CC(O)=O)(C)C(=O)C(F)(F)C(F)F)C(F)(F)C(F)F)C(F)(F)C(F)F)C(F)(F)C(F)F)C(F)(F)C(F)F)C(F)(F)C(F)F)C(F)(F)C(F)F)                                                                                                                                                                                                                                                                                                                                                                                                                                                                                                                                                                                                                                                                                                                                                                                                                                                                                                                                                                                                                                                                                                                                                                                                                                                                                                                                                                                                                                                                                                                                                                                                                                                                                                                                                                                                                                                                                                                                                                                                                                                                                                                                                                                                                                                                                                                                                                                                                                                                                                                                                                                                                                                                                                                                                                                                                                                                                                                                                                                                                                                                                                                                                                                                                                                                                                                                                                                                                                                                                                                                                                                                                                                                                                                                                                                                                                                                                                                                                                                                                                                                                                                                                                                                                                                                                                                                                                                                                                                                                                                                                                                                                                                                                                                                                                                                                                                                                                                                                                                                                                                                                                                                                                                                                                                                                                                                                                                                         | -11.38 | 36.51 | 7.03 | P | OUT |
| QL00672 | perfluoroalkylamido betaine-related, n=10                    |            | (CNCCC[N+](CC(O)=O)(C)C(=O)C(F)(F)C(F)F)C(F)(F)C(F)F)C(F)(F)C(F)F)C(F)(F)C(F)F)C(F)(F)C(F)F)C(F)(F)C(F)F)C(F)(F)C(F)F)                                                                                                                                                                                                                                                                                                                                                                                                                                                                                                                                                                                                                                                                                                                                                                                                                                                                                                                                                                                                                                                                                                                                                                                                                                                                                                                                                                                                                                                                                                                                                                                                                                                                                                                                                                                                                                                                                                                                                                                                                                                                                                                                                                                                                                                                                                                                                                                                                                                                                                                                                                                                                                                                                                                                                                                                                                                                                                                                                                                                                                                                                                                                                                                                                                                                                                                                                                                                                                                                                                                                                                                                                                                                                                                                                                                                                                                                                                                                                                                                                                                                                                                                                                                                                                                                                                                                                                                                                                                                                                                                                                                                                                                                                                                                                                                                                                                                                                                                                                                                                                                                                                                                                                                                                                                                                                                                                                                                         | -11.07 | 35.00 | 6.90 | P | OUT |
| QL00673 | perfluoroalkylamido betaine-related, n=9_pos                 |            | (CNCCC[N+](CC(O)=O)(C)C(=O)C(F)(F)C(F)F)C(F)(F)C(F)F)C(F)(F)C(F)F)C(F)(F)C(F)F)C(F)(F)C(F)F)C(F)(F)C(F)F)C(F)(F)C(F)F)                                                                                                                                                                                                                                                                                                                                                                                                                                                                                                                                                                                                                                                                                                                                                                                                                                                                                                                                                                                                                                                                                                                                                                                                                                                                                                                                                                                                                                                                                                                                                                                                                                                                                                                                                                                                                                                                                                                                                                                                                                                                                                                                                                                                                                                                                                                                                                                                                                                                                                                                                                                                                                                                                                                                                                                                                                                                                                                                                                                                                                                                                                                                                                                                                                                                                                                                                                                                                                                                                                                                                                                                                                                                                                                                                                                                                                                                                                                                                                                                                                                                                                                                                                                                                                                                                                                                                                                                                                                                                                                                                                                                                                                                                                                                                                                                                                                                                                                                                                                                                                                                                                                                                                                                                                                                                                                                                                                                         | -10.74 | 33.33 | 6.76 | P | OUT |
| QL00674 | perfluoroalkylamido betaine-related, n=8                     |            | (CNCCC[N+](CC(O)=O)(C)C(=O)C(F)(F)C(F)F)C(F)(F)C(F)F)C(F)(F)C(F)F)C(F)(F)C(F)F)C(F)(F)C(F)F)C(F)(F)C(F)F)C(F)(F)C(F)F)                                                                                                                                                                                                                                                                                                                                                                                                                                                                                                                                                                                                                                                                                                                                                                                                                                                                                                                                                                                                                                                                                                                                                                                                                                                                                                                                                                                                                                                                                                                                                                                                                                                                                                                                                                                                                                                                                                                                                                                                                                                                                                                                                                                                                                                                                                                                                                                                                                                                                                                                                                                                                                                                                                                                                                                                                                                                                                                                                                                                                                                                                                                                                                                                                                                                                                                                                                                                                                                                                                                                                                                                                                                                                                                                                                                                                                                                                                                                                                                                                                                                                                                                                                                                                                                                                                                                                                                                                                                                                                                                                                                                                                                                                                                                                                                                                                                                                                                                                                                                                                                                                                                                                                                                                                                                                                                                                                                                         | -10.38 | 31.48 | 6.61 | P | OUT |
| QL00675 | perfluoroalkylamido betaine-related, n=7                     |            | (CNCCC[N+](CC(O)=O)(C)C(=O)C(F)(F)C(F)F)C(F)(F)C(F)F)C(F)(F)C(F)F)C(F)(F)C(F)F)C(F)(F)C(F)F)C(F)(F)C(F)F)C(F)(F)C(F)F)                                                                                                                                                                                                                                                                                                                                                                                                                                                                                                                                                                                                                                                                                                                                                                                                                                                                                                                                                                                                                                                                                                                                                                                                                                                                                                                                                                                                                                                                                                                                                                                                                                                                                                                                                                                                                                                                                                                                                                                                                                                                                                                                                                                                                                                                                                                                                                                                                                                                                                                                                                                                                                                                                                                                                                                                                                                                                                                                                                                                                                                                                                                                                                                                                                                                                                                                                                                                                                                                                                                                                                                                                                                                                                                                                                                                                                                                                                                                                                                                                                                                                                                                                                                                                                                                                                                                                                                                                                                                                                                                                                                                                                                                                                                                                                                                                                                                                                                                                                                                                                                                                                                                                                                                                                                                                                                                                                                                         | -9.99  | 29.41 | 6.45 | P | OUT |
| QL00676 | perfluoroalkylamido betaine-related, n=6                     |            | (CNCCC[N+](CC(O)=O)(C)C(=O)C(F)(F)C(F)F)C(F)(F)C(F)F)C(F)(F)C(F)F)C(F)(F)C(F)F)C(F)(F)C(F)F)C(F)(F)C(F)F)C(F)(F)C(F)F)                                                                                                                                                                                                                                                                                                                                                                                                                                                                                                                                                                                                                                                                                                                                                                                                                                                                                                                                                                                                                                                                                                                                                                                                                                                                                                                                                                                                                                                                                                                                                                                                                                                                                                                                                                                                                                                                                                                                                                                                                                                                                                                                                                                                                                                                                                                                                                                                                                                                                                                                                                                                                                                                                                                                                                                                                                                                                                                                                                                                                                                                                                                                                                                                                                                                                                                                                                                                                                                                                                                                                                                                                                                                                                                                                                                                                                                                                                                                                                                                                                                                                                                                                                                                                                                                                                                                                                                                                                                                                                                                                                                                                                                                                                                                                                                                                                                                                                                                                                                                                                                                                                                                                                                                                                                                                                                                                                                                         | -9.56  | 27.08 | 6.27 | P | OUT |
| QL00677 | Perfluoroalkylamido betaine-related_i, n=12                  |            | (CNCCC[N+](CC(O)C(C)C=O)(C)C(=O)C(F)(F)C(F)F)C(F)(F)C(F)F)C(F)(F)C(F)F)C(F)(F)C(F)F)C(F)(F)C(F)F)C(F)(F)C(F)F)C(F)(F)C(F)F)                                                                                                                                                                                                                                                                                                                                                                                                                                                                                                                                                                                                                                                                                                                                                                                                                                                                                                                                                                                                                                                                                                                                                                                                                                                                                                                                                                                                                                                                                                                                                                                                                                                                                                                                                                                                                                                                                                                                                                                                                                                                                                                                                                                                                                                                                                                                                                                                                                                                                                                                                                                                                                                                                                                                                                                                                                                                                                                                                                                                                                                                                                                                                                                                                                                                                                                                                                                                                                                                                                                                                                                                                                                                                                                                                                                                                                                                                                                                                                                                                                                                                                                                                                                                                                                                                                                                                                                                                                                                                                                                                                                                                                                                                                                                                                                                                                                                                                                                                                                                                                                                                                                                                                                                                                                                                                                                                                                                    | -11.82 | 33.33 | 7.27 | P | OUT |
| QL00678 | Perfluoroalkylamido betaine-related_i, n=10                  |            | (CNCCC[N+](CC(O)C(C)C=O)(C)C(=O)C(F)(F)C(F)F)C(F)(F)C(F)F)C(F)(F)C(F)F)C(F)(F)C(F)F)C(F)(F)C(F)F)C(F)(F)C(F)F)C(F)(F)C(F)F)                                                                                                                                                                                                                                                                                                                                                                                                                                                                                                                                                                                                                                                                                                                                                                                                                                                                                                                                                                                                                                                                                                                                                                                                                                                                                                                                                                                                                                                                                                                                                                                                                                                                                                                                                                                                                                                                                                                                                                                                                                                                                                                                                                                                                                                                                                                                                                                                                                                                                                                                                                                                                                                                                                                                                                                                                                                                                                                                                                                                                                                                                                                                                                                                                                                                                                                                                                                                                                                                                                                                                                                                                                                                                                                                                                                                                                                                                                                                                                                                                                                                                                                                                                                                                                                                                                                                                                                                                                                                                                                                                                                                                                                                                                                                                                                                                                                                                                                                                                                                                                                                                                                                                                                                                                                                                                                                                                                                    | -11.25 | 30.43 | 7.03 | P | OUT |
| QL00679 | Perfluoroalkylamido betaine-related_i, n=8                   |            | (CNCCC[N+](CC(O)C(C)C=O)(C)C(=O)C(F)(F)C(F)F)C(F)(F)C(F)F)C(F)(F)C(F)F)C(F)(F)C(F)F)C(F)(F)C(F)F)C(F)(F)C(F)F)C(F)(F)C(F)F)                                                                                                                                                                                                                                                                                                                                                                                                                                                                                                                                                                                                                                                                                                                                                                                                                                                                                                                                                                                                                                                                                                                                                                                                                                                                                                                                                                                                                                                                                                                                                                                                                                                                                                                                                                                                                                                                                                                                                                                                                                                                                                                                                                                                                                                                                                                                                                                                                                                                                                                                                                                                                                                                                                                                                                                                                                                                                                                                                                                                                                                                                                                                                                                                                                                                                                                                                                                                                                                                                                                                                                                                                                                                                                                                                                                                                                                                                                                                                                                                                                                                                                                                                                                                                                                                                                                                                                                                                                                                                                                                                                                                                                                                                                                                                                                                                                                                                                                                                                                                                                                                                                                                                                                                                                                                                                                                                                                                    | -10.60 | 26.98 | 6.76 | P | OUT |
| QL00680 | (2-Carboxyethyl)-3-(((perfluoro-7-methyloctyl)2-hydroxypropy | 73353-25-0 | C(NCCC[N+](CCC(O)=O)(C)C)CO)CC(F)(F)C(F)F)C(F)(F)C(F)F)C(F)(F)C(F)F)C(F)(F)C(F)F)C(F)(F)C(F)F)C(F)(F)C(F)F)F.[OH-]                                                                                                                                                                                                                                                                                                                                                                                                                                                                                                                                                                                                                                                                                                                                                                                                                                                                                                                                                                                                                                                                                                                                                                                                                                                                                                                                                                                                                                                                                                                                                                                                                                                                                                                                                                                                                                                                                                                                                                                                                                                                                                                                                                                                                                                                                                                                                                                                                                                                                                                                                                                                                                                                                                                                                                                                                                                                                                                                                                                                                                                                                                                                                                                                                                                                                                                                                                                                                                                                                                                                                                                                                                                                                                                                                                                                                                                                                                                                                                                                                                                                                                                                                                                                                                                                                                                                                                                                                                                                                                                                                                                                                                                                                                                                                                                                                                                                                                                                                                                                                                                                                                                                                                                                                                                                                                                                                                                                             | -10.91 | 27.14 | 6.90 | P | OUT |
| QL00681 | perfluoroalkylamido ammonium, n=14                           |            | (CNCCCCN(C)C(=O)C(F)(F)C(F)F)C(F)(F)C(F)F)C(F)(F)C(F)F)C(F)(F)C(F)F)C(F)(F)C(F)F)C(F)(F)C(F)F)C(F)(F)C(F)F)C(F)(F)C(F)F)                                                                                                                                                                                                                                                                                                                                                                                                                                                                                                                                                                                                                                                                                                                                                                                                                                                                                                                                                                                                                                                                                                                                                                                                                                                                                                                                                                                                                                                                                                                                                                                                                                                                                                                                                                                                                                                                                                                                                                                                                                                                                                                                                                                                                                                                                                                                                                                                                                                                                                                                                                                                                                                                                                                                                                                                                                                                                                                                                                                                                                                                                                                                                                                                                                                                                                                                                                                                                                                                                                                                                                                                                                                                                                                                                                                                                                                                                                                                                                                                                                                                                                                                                                                                                                                                                                                                                                                                                                                                                                                                                                                                                                                                                                                                                                                                                                                                                                                                                                                                                                                                                                                                                                                                                                                                                                                                                                                                       | -11.98 | 44.62 | 7.23 | P | OUT |
| QL00682 | perfluoroalkylamido ammonium, n=12                           |            | (CNCCCCN(C)C(=O)C(F)(F)C(F)F)C(F)(F)C(F)F)C(F)(F)C(F)F)C(F)(F)C(F)F)C(F)(F)C(F)F)C(F)(F)C(F)F)C(F)(F)C(F)F)C(F)(F)C(F)F)                                                                                                                                                                                                                                                                                                                                                                                                                                                                                                                                                                                                                                                                                                                                                                                                                                                                                                                                                                                                                                                                                                                                                                                                                                                                                                                                                                                                                                                                                                                                                                                                                                                                                                                                                                                                                                                                                                                                                                                                                                                                                                                                                                                                                                                                                                                                                                                                                                                                                                                                                                                                                                                                                                                                                                                                                                                                                                                                                                                                                                                                                                                                                                                                                                                                                                                                                                                                                                                                                                                                                                                                                                                                                                                                                                                                                                                                                                                                                                                                                                                                                                                                                                                                                                                                                                                                                                                                                                                                                                                                                                                                                                                                                                                                                                                                                                                                                                                                                                                                                                                                                                                                                                                                                                                                                                                                                                                                       | -11.41 | 42.37 | 6.99 | P | OUT |
| QL00683 | perfluoroalkylamido ammonium, n=11                           |            | (CNCCCCN(C)C(=O)C(F)(F)C(F)F)C(F)(F)C(F)F)C(F)(F)C(F)F)C(F)(F)C(F)F)C(F)(F)C(F)F)C(F)(F)C(F)F)C(F)(F)C(F)F)C(F)(F)C(F)F)                                                                                                                                                                                                                                                                                                                                                                                                                                                                                                                                                                                                                                                                                                                                                                                                                                                                                                                                                                                                                                                                                                                                                                                                                                                                                                                                                                                                                                                                                                                                                                                                                                                                                                                                                                                                                                                                                                                                                                                                                                                                                                                                                                                                                                                                                                                                                                                                                                                                                                                                                                                                                                                                                                                                                                                                                                                                                                                                                                                                                                                                                                                                                                                                                                                                                                                                                                                                                                                                                                                                                                                                                                                                                                                                                                                                                                                                                                                                                                                                                                                                                                                                                                                                                                                                                                                                                                                                                                                                                                                                                                                                                                                                                                                                                                                                                                                                                                                                                                                                                                                                                                                                                                                                                                                                                                                                                                                                       | -11.10 | 41.07 | 6.85 | P | OUT |
| QL00684 | perfluoroalkylamido ammonium, n=10                           |            | (CNCCCCN(C)C(=O)C(F)(F)C(F)F)C(F)(F)C(F)F)C(F)(F)C(F)F)C(F)(F)C(F)F)C(F)(F)C(F)F)C(F)(F)C(F)F)C(F)(F)C(F)F)C(F)(F)C(F)F)                                                                                                                                                                                                                                                                                                                                                                                                                                                                                                                                                                                                                                                                                                                                                                                                                                                                                                                                                                                                                                                                                                                                                                                                                                                                                                                                                                                                                                                                                                                                                                                                                                                                                                                                                                                                                                                                                                                                                                                                                                                                                                                                                                                                                                                                                                                                                                                                                                                                                                                                                                                                                                                                                                                                                                                                                                                                                                                                                                                                                                                                                                                                                                                                                                                                                                                                                                                                                                                                                                                                                                                                                                                                                                                                                                                                                                                                                                                                                                                                                                                                                                                                                                                                                                                                                                                                                                                                                                                                                                                                                                                                                                                                                                                                                                                                                                                                                                                                                                                                                                                                                                                                                                                                                                                                                                                                                                                                       | -10.76 | 39.62 | 6.71 | P | OUT |
| QL00685 | perfluoroalkylamido ammonium, n=9                            |            | (CNCCCCN(C)C(=O)C(F)(F)C(F)F)C(F)(F)C(F)F)C(F)(F)C(F)F)C(F)(F)C(F)F)C(F)(F)C(F)F)C(F)(F)C(F)F)C(F)(F)C(F)F)C(F)(F)C(F)F)                                                                                                                                                                                                                                                                                                                                                                                                                                                                                                                                                                                                                                                                                                                                                                                                                                                                                                                                                                                                                                                                                                                                                                                                                                                                                                                                                                                                                                                                                                                                                                                                                                                                                                                                                                                                                                                                                                                                                                                                                                                                                                                                                                                                                                                                                                                                                                                                                                                                                                                                                                                                                                                                                                                                                                                                                                                                                                                                                                                                                                                                                                                                                                                                                                                                                                                                                                                                                                                                                                                                                                                                                                                                                                                                                                                                                                                                                                                                                                                                                                                                                                                                                                                                                                                                                                                                                                                                                                                                                                                                                                                                                                                                                                                                                                                                                                                                                                                                                                                                                                                                                                                                                                                                                                                                                                                                                                                                       | -10.40 | 38.00 | 6.56 | P | OUT |
| QL00686 | perfluoroalkylamido ammonium, n=8                            |            | (CNCCCCN(C)C(=O)C(F)(F)C(F)F)C(F)(F)C(F)F)C(F)(F)C(F)F)C(F)(F)C(F)F)C(F)(F)C(F)F)C(F)(F)C(F)F)C(F)(F)C(F)F)C(F)(F)C(F)F)                                                                                                                                                                                                                                                                                                                                                                                                                                                                                                                                                                                                                                                                                                                                                                                                                                                                                                                                                                                                                                                                                                                                                                                                                                                                                                                                                                                                                                                                                                                                                                                                                                                                                                                                                                                                                                                                                                                                                                                                                                                                                                                                                                                                                                                                                                                                                                                                                                                                                                                                                                                                                                                                                                                                                                                                                                                                                                                                                                                                                                                                                                                                                                                                                                                                                                                                                                                                                                                                                                                                                                                                                                                                                                                                                                                                                                                                                                                                                                                                                                                                                                                                                                                                                                                                                                                                                                                                                                                                                                                                                                                                                                                                                                                                                                                                                                                                                                                                                                                                                                                                                                                                                                                                                                                                                                                                                                                                       | -10.01 | 36.17 | 6.39 | P | OUT |
| QL00687 | perfluoroalkylamido ammonium, n=7                            |            | (CNCCCCN(C)C(=O)C(F)(F)C(F)F)C(F)(F)C(F)F)C(F)(F)C(F)F)C(F)(F)C(F)F)C(F)(F)C(F)F)C(F)(F)C(F)F)C(F)(F)C(F)F)C(F)(F)C(F)F)                                                                                                                                                                                                                                                                                                                                                                                                                                                                                                                                                                                                                                                                                                                                                                                                                                                                                                                                                                                                                                                                                                                                                                                                                                                                                                                                                                                                                                                                                                                                                                                                                                                                                                                                                                                                                                                                                                                                                                                                                                                                                                                                                                                                                                                                                                                                                                                                                                                                                                                                                                                                                                                                                                                                                                                                                                                                                                                                                                                                                                                                                                                                                                                                                                                                                                                                                                                                                                                                                                                                                                                                                                                                                                                                                                                                                                                                                                                                                                                                                                                                                                                                                                                                                                                                                                                                                                                                                                                                                                                                                                                                                                                                                                                                                                                                                                                                                                                                                                                                                                                                                                                                                                                                                                                                                                                                                                                                       | -9.58  | 34.09 | 6.21 | P | OUT |
| QL00688 | perfluoroalkylamido ammonium, n=6                            |            | (CNCCCCN(C)C(=O)C(F)(F)C(F)F)C(F)(F)C(F)F)C(F)(F)C(F)F)C(F)(F)C(F)F)C(F)(F)C(F)F)C(F)(F)C(F)F)C(F)(F)C(F)F)C(F)(F)C(F)F)                                                                                                                                                                                                                                                                                                                                                                                                                                                                                                                                                                                                                                                                                                                                                                                                                                                                                                                                                                                                                                                                                                                                                                                                                                                                                                                                                                                                                                                                                                                                                                                                                                                                                                                                                                                                                                                                                                                                                                                                                                                                                                                                                                                                                                                                                                                                                                                                                                                                                                                                                                                                                                                                                                                                                                                                                                                                                                                                                                                                                                                                                                                                                                                                                                                                                                                                                                                                                                                                                                                                                                                                                                                                                                                                                                                                                                                                                                                                                                                                                                                                                                                                                                                                                                                                                                                                                                                                                                                                                                                                                                                                                                                                                                                                                                                                                                                                                                                                                                                                                                                                                                                                                                                                                                                                                                                                                                                                       | -9.10  | 31.71 | 6.01 | P | OUT |
| QL00689 | perfluoroalkylamido ammonium, n=5                            |            | (CNCCCCN(C)C(=O)C(F)(F)C(F)F)C(F)(F)C(F)F)C(F)(F)C(F)F)C(F)(F)C(F)F)C(F)(F)C(F)F)C(F)(F)C(F)F)C(F)(F)C(F)F)C(F)(F)C(F)F)                                                                                                                                                                                                                                                                                                                                                                                                                                                                                                                                                                                                                                                                                                                                                                                                                                                                                                                                                                                                                                                                                                                                                                                                                                                                                                                                                                                                                                                                                                                                                                                                                                                                                                                                                                                                                                                                                                                                                                                                                                                                                                                                                                                                                                                                                                                                                                                                                                                                                                                                                                                                                                                                                                                                                                                                                                                                                                                                                                                                                                                                                                                                                                                                                                                                                                                                                                                                                                                                                                                                                                                                                                                                                                                                                                                                                                                                                                                                                                                                                                                                                                                                                                                                                                                                                                                                                                                                                                                                                                                                                                                                                                                                                                                                                                                                                                                                                                                                                                                                                                                                                                                                                                                                                                                                                                                                                                                                       | -8.57  | 28.95 | 5.79 | P | OUT |
| QL00690 | perfluoroalkylamido ammonium, n=4                            |            | (CNCCCCN(C)C(=O)C(F)(F)C(F)F)C(F)(F)C(F)F)C(F)(F)C(F)F)C(F)(F)C(F)F)C(F)(F)C(F)F)C(F)(F)C(F)F)C(F)(F)C(F)F)C(F)(F)C(F)F)                                                                                                                                                                                                                                                                                                                                                                                                                                                                                                                                                                                                                                                                                                                                                                                                                                                                                                                                                                                                                                                                                                                                                                                                                                                                                                                                                                                                                                                                                                                                                                                                                                                                                                                                                                                                                                                                                                                                                                                                                                                                                                                                                                                                                                                                                                                                                                                                                                                                                                                                                                                                                                                                                                                                                                                                                                                                                                                                                                                                                                                                                                                                                                                                                                                                                                                                                                                                                                                                                                                                                                                                                                                                                                                                                                                                                                                                                                                                                                                                                                                                                                                                                                                                                                                                                                                                                                                                                                                                                                                                                                                                                                                                                                                                                                                                                                                                                                                                                                                                                                                                                                                                                                                                                                                                                                                                                                                                       | -7.97  | 25.71 | 5.54 | P | OUT |
| QL00691 | perfluoroalkylamido ammonium, n=3                            |            | (CNCCCCN(C)C(=O)C(F)(F)C(F)F)C(F)(F)C(F)F)C(F)(F)C(F)F)C(F)(F)C(F)F)C(F)(F)C(F)F)C(F)(F)C(F)F)C(F)(F)C(F)F)C(F)(F)C(F)F)                                                                                                                                                                                                                                                                                                                                                                                                                                                                                                                                                                                                                                                                                                                                                                                                                                                                                                                                                                                                                                                                                                                                                                                                                                                                                                                                                                                                                                                                                                                                                                                                                                                                                                                                                                                                                                                                                                                                                                                                                                                                                                                                                                                                                                                                                                                                                                                                                                                                                                                                                                                                                                                                                                                                                                                                                                                                                                                                                                                                                                                                                                                                                                                                                                                                                                                                                                                                                                                                                                                                                                                                                                                                                                                                                                                                                                                                                                                                                                                                                                                                                                                                                                                                                                                                                                                                                                                                                                                                                                                                                                                                                                                                                                                                                                                                                                                                                                                                                                                                                                                                                                                                                                                                                                                                                                                                                                                                       | -7.28  | 21.88 | 5.25 | P | OUT |
| QL00692 | 1-((3-(Dimethylamino)propyl)amino)-3-(perfluoro-7-methyloc   | 73353-26-1 | (CNCCCCN(C)C(O)CC(F)(F)C(F)F)C(F)(F)C(F)F)C(F)(F)C(F)F)C(F)(F)C(F)F)C(F)(F)C(F)F)C(F)(F)C(F)F)C(F)(F)C(F)F)C(F)(F)C(F)F)                                                                                                                                                                                                                                                                                                                                                                                                                                                                                                                                                                                                                                                                                                                                                                                                                                                                                                                                                                                                                                                                                                                                                                                                                                                                                                                                                                                                                                                                                                                                                                                                                                                                                                                                                                                                                                                                                                                                                                                                                                                                                                                                                                                                                                                                                                                                                                                                                                                                                                                                                                                                                                                                                                                                                                                                                                                                                                                                                                                                                                                                                                                                                                                                                                                                                                                                                                                                                                                                                                                                                                                                                                                                                                                                                                                                                                                                                                                                                                                                                                                                                                                                                                                                                                                                                                                                                                                                                                                                                                                                                                                                                                                                                                                                                                                                                                                                                                                                                                                                                                                                                                                                                                                                                                                                                                                                                                                                       | -10.51 | 32.76 | 6.66 | P | OUT |
| QL00693 | 1-((3-(Dimethylamino)propyl)amino)-(3-(perfluoro-11-methykc  | 94159-82-7 | (CNCCCCN(C)C(O)CC(F)(F)C(F)F)C(F)(F)C(F)F)C(F)(F)C(F)F)C(F)(F)C(F)F)C(F)(F)C(F)F)C(F)(F)C(F)F)C(F)(F)C(F)F)C(F)(F)C(F)F)                                                                                                                                                                                                                                                                                                                                                                                                                                                                                                                                                                                                                                                                                                                                                                                                                                                                                                                                                                                                                                                                                                                                                                                                                                                                                                                                                                                                                                                                                                                                                                                                                                                                                                                                                                                                                                                                                                                                                                                                                                                                                                                                                                                                                                                                                                                                                                                                                                                                                                                                                                                                                                                                                                                                                                                                                                                                                                                                                                                                                                                                                                                                                                                                                                                                                                                                                                                                                                                                                                                                                                                                                                                                                                                                                                                                                                                                                                                                                                                                                                                                                                                                                                                                                                                                                                                                                                                                                                                                                                                                                                                                                                                                                                                                                                                                                                                                                                                                                                                                                                                                                                                                                                                                                                                                                                                                                                                                       | -11.77 | 38.57 | 7.19 | P | OUT |
| QL00694 | 1-((3-(Dimethylamino)propyl)amino)-(3-(perfluorododecyl)on   | 94159-79-2 | (CNCCCCN(C)C(O)CC(F)(F)C(F)F)C(F)(F)C(F)F)C(F)(F)C(F)F)C(F)(F)C(F)F)C(F)(F)C(F)F)C(F)(F)C(F)F)C(F)(F)C(F)F)C(F)(F)C(F)F)                                                                                                                                                                                                                                                                                                                                                                                                                                                                                                                                                                                                                                                                                                                                                                                                                                                                                                                                                                                                                                                                                                                                                                                                                                                                                                                                                                                                                                                                                                                                                                                                                                                                                                                                                                                                                                                                                                                                                                                                                                                                                                                                                                                                                                                                                                                                                                                                                                                                                                                                                                                                                                                                                                                                                                                                                                                                                                                                                                                                                                                                                                                                                                                                                                                                                                                                                                                                                                                                                                                                                                                                                                                                                                                                                                                                                                                                                                                                                                                                                                                                                                                                                                                                                                                                                                                                                                                                                                                                                                                                                                                                                                                                                                                                                                                                                                                                                                                                                                                                                                                                                                                                                                                                                                                                                                                                                                                                       | -11.48 | 37.31 | 7.07 | P | OUT |
| QL00695 | 1-((3-(Dimethylamino)propyl)amino)-(3-(perfluorodecyl)prop:  | 94159-80-5 | C(NCCCCN(C)C(O)CC(F)(F)C(F)F)C(F)(F)C(F)F)C(F)(F)C(F)F)C(F)(F)C(F)F)C(F)(F)C(F)F)C(F)(F)C(F)F)C(F)(F)C(F)F)C(F)(F)C(F)F)C(O)(=O)C(F)C(F)F)C(F)F)C(F)F)C(F)F)C(F)F)C(F)F)C(F)F)C(F)F)C(F)F)C(F)F)C(F)F)C(F)F)C(F)F)C(F)F)C(F)F)C(F)F)C(F)F)C(F)F)C(F)F)C(F)F)C(F)F)C(F)F)C(F)F)C(F)F)C(F)F)C(F)F)C(F)F)C(F)F)C(F)F)C(F)F)C(F)F)C(F)F)C(F)F)C(F)F)C(F)F)C(F)F)C(F)F)C(F)F)C(F)F)C(F)F)C(F)F)C(F)F)C(F)F)C(F)F)C(F)F)C(F)F)C(F)F)C(F)F)C(F)F)C(F)F)C(F)F)C(F)F)C(F)F)C(F)F)C(F)F)C(F)F)C(F)F)C(F)F)C(F)F)C(F)F)C(F)F)C(F)F)C(F)F)C(F)F)C(F)F)C(F)F)C(F)F)C(F)F)C(F)F)C(F)F)C(F)F)C(F)F)C(F)F)C(F)F)C(F)F)C(F)F)C(F)F)C(F)F)C(F)F)C(F)F)C(F)F)C(F)F)C(F)F)C(F)F)C(F)F)C(F)F)C(F)F)C(F)F)C(F)F)C(F)F)C(F)F)C(F)F)C(F)F)C(F)F)C(F)F)C(F)F)C(F)F)C(F)F)C(F)F)C(F)F)C(F)F)C(F)F)C(F)F)C(F)F)C(F)F)C(F)F)C(F)F)C(F)F)C(F)F)C(F)F)C(F)F)C(F)F)C(F)F)C(F)F)C(F)F)C(F)F)C(F)F)C(F)F)C(F)F)C(F)F)C(F)F)C(F)F)C(F)F)C(F)F)C(F)F)C(F)F)C(F)F)C(F)F)C(F)F)C(F)F)C(F)F)C(F)F)C(F)F)C(F)F)C(F)F)C(F)F)C(F)F)C(F)F)C(F)F)C(F)F)C(F)F)C(F)F)C(F)F)C(F)F)C(F)F)C(F)F)C(F)F)C(F)F)C(F)F)C(F)F)C(F)F)C(F)F)C(F)F)C(F)F)C(F)F)C(F)F)C(F)F)C(F)F)C(F)F)C(F)F)C(F)F)C(F)F)C(F)F)C(F)F)C(F)F)C(F)F)C(F)F)C(F)F)C(F)F)C(F)F)C(F)F)C(F)F)C(F)F)C(F)F)C(F)F)C(F)F)C(F)F)C(F)F)C(F)F)C(F)F)C(F)F)C(F)F)C(F)F)C(F)F)C(F)F)C(F)F)C(F)F)C(F)F)C(F)F)C(F)F)C(F)F)C(F)F)C(F)F)C(F)F)C(F)F)C(F)F)C(F)F)C(F)F)C(F)F)C(F)F)C(F)F)C(F)F)C(F)F)C(F)F)C(F)F)C(F)F)C(F)F)C(F)F)C(F)F)C(F)F)C(F)F)C(F)F)C(F)F)C(F)F)C(F)F)C(F)F)C(F)F)C(F)F)C(F)F)C(F)F)C(F)F)C(F)F)C(F)F)C(F)F)C(F)F)C(F)F)C(F)F)C(F)F)C(F)F)C(F)F)C(F)F)C(F)F)C(F)F)C(F)F)C(F)F)C(F)F)C(F)F)C(F)F)C(F)F)C(F)F)C(F)F)C(F)F)C(F)F)C(F)F)C(F)F)C(F)F)C(F)F)C(F)F)C(F)F)C(F)F)C(F)F)C(F)F)C(F)F)C(F)F)C(F)F)C(F)F)C(F)F)C(F)F)C(F)F)C(F)F)C(F)F)C(F)F)C(F)F)C(F)F)C(F)F)C(F)F)C(F)F)C(F)F)C(F)F)C(F)F)C(F)F)C(F)F)C(F)F)C(F)F)C(F)F)C(F)F)C(F)F)C(F)F)C(F)F)C(F)F)C(F)F)C(F)F)C(F)F)C(F)F)C(F)F)C(F)F)C(F)F)C(F)F)C(F)F)C(F)F)C(F)F)C(F)F)C(F)F)C(F)F)C(F)F)C(F)F)C(F)F)C(F)F)C(F)F)C(F)F)C(F)F)C(F)F)C(F)F)C(F)F)C(F)F)C(F)F)C(F)F)C(F)F)C(F)F)C(F)F)C(F)F)C(F)F)C(F)F)C(F)F)C(F)F)C(F)F)C(F)F)C(F)F)C(F)F)C(F)F)C(F)F)C(F)F)C(F)F)C(F)F)C(F)F)C(F)F)C(F)F)C(F)F)C(F)F)C(F)F)C(F)F)C(F)F)C(F)F)C(F)F)C(F)F)C(F)F)C(F)F)C(F)F)C(F)F)C(F)F)C(F)F)C(F)F)C(F)F)C(F)F)C(F)F)C(F)F)C(F)F)C(F)F)C(F)F)C(F)F)C(F)F)C(F)F)C(F)F)C(F)F)C(F)F)C(F)F)C(F)F)C(F)F)C(F)F)C(F)F)C(F)F)C(F)F)C(F)F)C(F)F)C(F)F)C(F)F)C(F)F)C(F)F)C(F)F)C(F)F)C(F)F)C(F)F)C(F)F)C(F)F)C(F)F)C(F)F)C(F)F)C(F)F)C(F)F)C(F)F)C(F)F)C(F)F)C(F)F)C(F)F)C(F)F)C(F)F)C(F)F)C(F)F)C(F)F)C(F)F)C(F)F)C(F)F)C(F)F)C(F)F)C(F)F)C(F)F)C(F)F)C(F)F)C(F)F)C(F)F)C(F)F)C(F)F)C(F)F)C(F)F)C(F)F)C(F)F)C(F)F)C(F)F)C(F)F)C(F)F)C(F)F)C(F)F)C(F)F)C(F)F)C(F)F)C(F)F)C(F)F)C(F)F)C(F)F)C(F)F)C(F)F)C(F)F)C(F)F)C(F)F)C(F)F)C(F)F)C(F)F)C(F)F)C(F)F)C(F)F)C(F)F)C(F)F)C(F)F)C(F)F)C(F)F)C(F)F)C(F)F)C(F)F)C(F)F)C(F)F)C(F)F)C(F)F)C(F)F)C(F)F)C(F)F)C(F)F)C(F)F)C(F)F)C(F)F)C(F)F)C(F)F)C(F)F)C(F)F)C(F)F)C(F)F)C(F)F)C(F)F)C(F)F)C(F)F)C(F)F)C(F)F)C(F)F)C(F)F)C(F)F)C(F)F)C(F)F)C(F)F)C(F)F)C(F)F)C(F)F)C(F)F)C(F)F)C(F)F)C(F)F)C(F)F)C(F)F)C(F)F)C(F)F)C(F)F)C(F)F)C(F)F)C(F)F)C(F)F)C(F)F)C(F)F)C(F)F)C(F)F)C(F)F)C(F)F)C(F)F)C(F)F)C(F)F)C(F)F)C(F)F)C(F)F)C(F)F)C(F)F)C(F)F)C(F)F)C(F)F)C(F)F)C(F)F)C(F)F)C(F)F)C(F)F)C(F)F)C(F)F)C(F)F)C(F)F)C(F)F)C(F)F)C(F)F)C(F)F)C(F)F)C(F)F)C(F)F)C(F)F)C(F)F)C(F)F)C(F)F)C(F)F)C(F)F)C(F)F)C(F)F)C(F)F)C(F)F)C(F)F)C(F)F)C(F)F)C(F)F)C(F)F)C(F)F)C(F)F)C(F)F)C(F)F)C(F)F)C(F)F)C(F)F)C(F)F)C(F)F)C(F)F)C(F)F)C(F)F)C(F)F)C(F)F)C(F)F)C(F)F)C(F)F)C(F)F)C(F)F)C(F)F)C(F)F)C(F)F)C(F)F)C(F)F)C(F)F)C(F)F)C(F)F)C(F)F)C(F)F)C(F)F)C(F)F)C(F)F)C(F)F)C(F)F)C(F)F)C(F)F)C(F)F)C(F)F)C(F)F)C(F)F)C(F)F)C(F)F)C(F)F)C(F)F)C(F)F)C(F)F)C(F)F)C(F)F)C(F)F)C(F)F)C(F)F)C(F)F)C(F)F)C(F)F)C(F)F)C(F)F)C(F)F)C(F)F)C(F)F)C(F)F)C(F)F)C(F)F)C(F)F)C(F)F)C(F)F)C(F)F)C(F)F)C(F)F)C(F)F)C(F)F)C(F)F)C(F)F)C(F)F)C(F)F)C(F)F)C(F)F)C(F)F)C(F)F)C(F)F)C(F)F)C(F)F)C(F)F)C(F)F)C(F)F)C(F)F)C(F)F)C(F)F)C(F)F)C(F)F)C(F)F)C(F)F)C(F)F)C(F)F)C(F)F)C(F)F)C(F)F)C(F)F)C(F)F)C(F)F)C(F)F)C(F)F)C(F)F)C(F)F)C(F)F)C(F)F)C(F)F)C(F)F)C(F)F)C(F)F)C(F)F)C(F)F)C(F)F)C(F)F)C(F)F)C(F)F)C(F)F)C(F)F)C(F)F)C(F)F)C(F)F)C(F)F)C(F)F)C(F)F)C(F)F)C(F)F)C(F)F)C(F)F)C(F)F)C(F)F)C(F)F)C(F)F)C(F)F)C(F)F)C(F)F)C(F)F)C(F)F)C(F)F)C(F)F)C(F)F)C(F)F)C(F)F)C(F)F)C(F)F)C(F)F)C(F)F)C(F)F)C(F)F)C(F)F)C(F)F)C(F)F)C(F)F)C(F)F)C(F)F)C(F)F)C(F)F)C(F)F)C(F)F)C(F)F)C(F)F)C(F)F)C(F)F)C(F)F)C(F)F)C(F)F)C(F)F)C(F)F)C(F)F)C(F)F)C(F)F)C(F)F)C(F)F)C(F)F)C(F)F)C(F)F)C(F)F)C(F)F)C(F)F)C(F)F)C(F)F)C(F)F)C(F)F)C(F)F)C(F)F)C(F)F)C(F)F)C(F)F)C(F)F)C(F)F)C(F)F)C(F)F)C(F)F)C(F)F)C(F)F)C(F)F)C(F)F)C(F)F)C(F)F)C(F)F)C(F)F)C(F)F)C(F)F)C(F)F)C(F)F)C(F)F)C(F)F)C(F)F)C(F)F)C(F)F)C(F)F)C(F)F)C(F)F)C(F)F)C(F)F)C(F)F)C(F)F)C(F)F)C(F)F)C(F)F)C(F)F)C(F)F)C(F)F)C(F)F)C(F)F)C(F)F)C(F)F)C(F)F)C(F)F)C(F)F)C(F)F)C(F)F)C(F)F)C(F)F)C(F)F)C(F)F)C(F)F)C(F)F)C(F)F)C(F)F)C(F)F)C(F)F)C(F)F)C(F)F)C(F)F)C(F)F)C(F)F)C(F)F)C(F)F)C(F)F)C(F)F)C(F)F)C(F)F)C(F)F)C(F)F)C(F)F)C(F)F)C(F)F)C(F)F)C(F)F)C(F)F)C(F)F)C(F)F)C(F)F)C(F)F)C(F)F)C(F)F)C(F)F)C(F)F)C(F)F)C(F)F)C(F)F)C(F)F)C(F)F)C(F)F)C(F)F)C(F)F)C(F)F)C(F)F)C(F)F)C(F)F)C(F)F)C(F)F)C(F)F)C(F)F)C(F)F)C(F)F)C(F)F)C(F)F)C(F)F)C(F)F)C(F)F)C(F)F)C(F)F)C(F)F)C(F)F)C(F)F)C(F)F)C(F)F)C(F)F)C(F)F)C(F)F)C(F)F)C(F)F)C(F)F)C(F)F)C(F)F)C(F)F)C(F)F)C(F)F)C(F)F)C(F)F)C(F)F)C(F)F)C(F)F)C(F)F)C(F)F)C(F)F)C(F)F)C(F)F)C(F)F)C(F)F)C(F)F)C(F)F)C(F)F)C(F)F)C(F)F)C(F)F)C(F)F)C(F)F)C(F)F)C(F)F)C(F)F)C(F)F) |        |       |      |   |     |



[illegible]



[illegible]



[illegible]



|         |                                                                                                         |              |                                                                                                                                                                                                                                                                                                                                                                                                                                                                                                                                                                                                                                                                                                                                                                                                                                                                                                                                                                                                                                                                                                                                                                                                                                                                                                                                                                                                                                                                                                                                                                                                                                                                                                                                                                                                                                                                                                                                                                                                                                                                                                                                                                                                                                                                                                                                                                                                                                                                                                                                                                                                                                                                                                                                                                                                                                                                                                                                                                                                                                                                                                                                                                                                                                                                                                                                                                                                                                                                                                                                                                                                                                                                                                                                                                                                                                                                                                                                                                                                                                                                                                                                                                                                                                                                                                                                                                                                                                                                                                                                                                                                                                                                                                                                                                                                                                                                                                      |        |       |      |   |     |
|---------|---------------------------------------------------------------------------------------------------------|--------------|------------------------------------------------------------------------------------------------------------------------------------------------------------------------------------------------------------------------------------------------------------------------------------------------------------------------------------------------------------------------------------------------------------------------------------------------------------------------------------------------------------------------------------------------------------------------------------------------------------------------------------------------------------------------------------------------------------------------------------------------------------------------------------------------------------------------------------------------------------------------------------------------------------------------------------------------------------------------------------------------------------------------------------------------------------------------------------------------------------------------------------------------------------------------------------------------------------------------------------------------------------------------------------------------------------------------------------------------------------------------------------------------------------------------------------------------------------------------------------------------------------------------------------------------------------------------------------------------------------------------------------------------------------------------------------------------------------------------------------------------------------------------------------------------------------------------------------------------------------------------------------------------------------------------------------------------------------------------------------------------------------------------------------------------------------------------------------------------------------------------------------------------------------------------------------------------------------------------------------------------------------------------------------------------------------------------------------------------------------------------------------------------------------------------------------------------------------------------------------------------------------------------------------------------------------------------------------------------------------------------------------------------------------------------------------------------------------------------------------------------------------------------------------------------------------------------------------------------------------------------------------------------------------------------------------------------------------------------------------------------------------------------------------------------------------------------------------------------------------------------------------------------------------------------------------------------------------------------------------------------------------------------------------------------------------------------------------------------------------------------------------------------------------------------------------------------------------------------------------------------------------------------------------------------------------------------------------------------------------------------------------------------------------------------------------------------------------------------------------------------------------------------------------------------------------------------------------------------------------------------------------------------------------------------------------------------------------------------------------------------------------------------------------------------------------------------------------------------------------------------------------------------------------------------------------------------------------------------------------------------------------------------------------------------------------------------------------------------------------------------------------------------------------------------------------------------------------------------------------------------------------------------------------------------------------------------------------------------------------------------------------------------------------------------------------------------------------------------------------------------------------------------------------------------------------------------------------------------------------------------------------------------------|--------|-------|------|---|-----|
| QLO0883 | 4,4,5,5,6,6,7,7,7-Nonafluoroheptyl 2-methylprop-2-enoate                                                | 243842-15-1  | CC=C(C)=O)OCCCC(F)(F)(F)(F)(F)(F)(C)(F)(F)                                                                                                                                                                                                                                                                                                                                                                                                                                                                                                                                                                                                                                                                                                                                                                                                                                                                                                                                                                                                                                                                                                                                                                                                                                                                                                                                                                                                                                                                                                                                                                                                                                                                                                                                                                                                                                                                                                                                                                                                                                                                                                                                                                                                                                                                                                                                                                                                                                                                                                                                                                                                                                                                                                                                                                                                                                                                                                                                                                                                                                                                                                                                                                                                                                                                                                                                                                                                                                                                                                                                                                                                                                                                                                                                                                                                                                                                                                                                                                                                                                                                                                                                                                                                                                                                                                                                                                                                                                                                                                                                                                                                                                                                                                                                                                                                                                                           | -8.00  | 27.27 | 5.54 | P | OUT |
| QLO0884 | 2-[(2-Methylprop-2-enoyl)oxy]ethyl heptafluorobutanoate                                                 | 146615-93-8  | CC=C(C)=O)OCCCOC(=O)C(F)(F)(F)(F)(F)(F)                                                                                                                                                                                                                                                                                                                                                                                                                                                                                                                                                                                                                                                                                                                                                                                                                                                                                                                                                                                                                                                                                                                                                                                                                                                                                                                                                                                                                                                                                                                                                                                                                                                                                                                                                                                                                                                                                                                                                                                                                                                                                                                                                                                                                                                                                                                                                                                                                                                                                                                                                                                                                                                                                                                                                                                                                                                                                                                                                                                                                                                                                                                                                                                                                                                                                                                                                                                                                                                                                                                                                                                                                                                                                                                                                                                                                                                                                                                                                                                                                                                                                                                                                                                                                                                                                                                                                                                                                                                                                                                                                                                                                                                                                                                                                                                                                                                              | -7.73  | 23.33 | 6.45 | P | OUT |
| QLO0885 | S-(Perfluoro-5-methylhexyl)ethyl-2-methylpropenethioate                                                 | 30769-91-6   | CC=C(C)=O)SCCCC(F)(F)(C)(F)(F)(C)(F)(F)(C)(F)(F)(F)                                                                                                                                                                                                                                                                                                                                                                                                                                                                                                                                                                                                                                                                                                                                                                                                                                                                                                                                                                                                                                                                                                                                                                                                                                                                                                                                                                                                                                                                                                                                                                                                                                                                                                                                                                                                                                                                                                                                                                                                                                                                                                                                                                                                                                                                                                                                                                                                                                                                                                                                                                                                                                                                                                                                                                                                                                                                                                                                                                                                                                                                                                                                                                                                                                                                                                                                                                                                                                                                                                                                                                                                                                                                                                                                                                                                                                                                                                                                                                                                                                                                                                                                                                                                                                                                                                                                                                                                                                                                                                                                                                                                                                                                                                                                                                                                                                                  | -9.53  | 38.46 | 5.14 | P | IN  |
| QLO0886 | S-(Perfluoro-7-(methyloctyl)ethylthiomethacrylate                                                       | 28506-33-4   | CC=C(C)=O)SCCC(F)(F)(F)(F)(F)(F)(F)(C)(F)(F)(C)(F)(F)(F)                                                                                                                                                                                                                                                                                                                                                                                                                                                                                                                                                                                                                                                                                                                                                                                                                                                                                                                                                                                                                                                                                                                                                                                                                                                                                                                                                                                                                                                                                                                                                                                                                                                                                                                                                                                                                                                                                                                                                                                                                                                                                                                                                                                                                                                                                                                                                                                                                                                                                                                                                                                                                                                                                                                                                                                                                                                                                                                                                                                                                                                                                                                                                                                                                                                                                                                                                                                                                                                                                                                                                                                                                                                                                                                                                                                                                                                                                                                                                                                                                                                                                                                                                                                                                                                                                                                                                                                                                                                                                                                                                                                                                                                                                                                                                                                                                                             | -10.37 | 42.22 | 6.50 | P | IN  |
| QLO0887 | 5-(Perfluoro-9-methyldecyl)ethyl)-2-methyl-2-propenethioate                                             | 30769-88-9   | CC=C(C)=O)SCCC(F)(F)(F)(F)(F)(F)(F)(F)(F)(C)(F)(F)(F)(F)(F)                                                                                                                                                                                                                                                                                                                                                                                                                                                                                                                                                                                                                                                                                                                                                                                                                                                                                                                                                                                                                                                                                                                                                                                                                                                                                                                                                                                                                                                                                                                                                                                                                                                                                                                                                                                                                                                                                                                                                                                                                                                                                                                                                                                                                                                                                                                                                                                                                                                                                                                                                                                                                                                                                                                                                                                                                                                                                                                                                                                                                                                                                                                                                                                                                                                                                                                                                                                                                                                                                                                                                                                                                                                                                                                                                                                                                                                                                                                                                                                                                                                                                                                                                                                                                                                                                                                                                                                                                                                                                                                                                                                                                                                                                                                                                                                                                                          | -11.08 | 45.10 | 6.81 | P | OUT |
| QLO0888 | 3-[1,1,2,2,3,3,3-Heptafluoropropan-2-yl)oxy]-2-methylprop-1-ene                                         | 38471-83-9   | CC=C(C)COC(F)(C)(F)(F)(C)(F)(F)                                                                                                                                                                                                                                                                                                                                                                                                                                                                                                                                                                                                                                                                                                                                                                                                                                                                                                                                                                                                                                                                                                                                                                                                                                                                                                                                                                                                                                                                                                                                                                                                                                                                                                                                                                                                                                                                                                                                                                                                                                                                                                                                                                                                                                                                                                                                                                                                                                                                                                                                                                                                                                                                                                                                                                                                                                                                                                                                                                                                                                                                                                                                                                                                                                                                                                                                                                                                                                                                                                                                                                                                                                                                                                                                                                                                                                                                                                                                                                                                                                                                                                                                                                                                                                                                                                                                                                                                                                                                                                                                                                                                                                                                                                                                                                                                                                                                      | -6.51  | 31.82 | 4.80 | P | IN  |
| QLO0889 | 3-Acetyl-5,5,6,6,7,7,8,8,8-nonafluorooctane-2,4-dione                                                   | 120110-91-0  | CC(=O)C(C)=O)C(=O)C(F)(F)(C)(F)(F)(C)(F)(F)                                                                                                                                                                                                                                                                                                                                                                                                                                                                                                                                                                                                                                                                                                                                                                                                                                                                                                                                                                                                                                                                                                                                                                                                                                                                                                                                                                                                                                                                                                                                                                                                                                                                                                                                                                                                                                                                                                                                                                                                                                                                                                                                                                                                                                                                                                                                                                                                                                                                                                                                                                                                                                                                                                                                                                                                                                                                                                                                                                                                                                                                                                                                                                                                                                                                                                                                                                                                                                                                                                                                                                                                                                                                                                                                                                                                                                                                                                                                                                                                                                                                                                                                                                                                                                                                                                                                                                                                                                                                                                                                                                                                                                                                                                                                                                                                                                                          | -8.08  | 31.03 | 5.54 | P | OUT |
| QLO0890 | 3,4,4,5,5,6,6,7,7,8,8,9,9-Pentadecafluorononan-2-one                                                    | 754-85-8     | CC(=O)C(F)(F)(C)(F)(F)(C)(F)(F)(C)(F)(F)(C)(F)(C)(F)(F)                                                                                                                                                                                                                                                                                                                                                                                                                                                                                                                                                                                                                                                                                                                                                                                                                                                                                                                                                                                                                                                                                                                                                                                                                                                                                                                                                                                                                                                                                                                                                                                                                                                                                                                                                                                                                                                                                                                                                                                                                                                                                                                                                                                                                                                                                                                                                                                                                                                                                                                                                                                                                                                                                                                                                                                                                                                                                                                                                                                                                                                                                                                                                                                                                                                                                                                                                                                                                                                                                                                                                                                                                                                                                                                                                                                                                                                                                                                                                                                                                                                                                                                                                                                                                                                                                                                                                                                                                                                                                                                                                                                                                                                                                                                                                                                                                                              | -9.08  | 53.57 | 5.79 | P | IN  |
| QLO0891 | 3,4,4,5,5,6,6,7,7,8,8,8-Tridecafluorooctan-2-one                                                        | 80793-21-1   | CC(=O)C(F)(F)(C)(F)(F)(C)(F)(F)(C)(F)(F)(C)(F)(F)(F)                                                                                                                                                                                                                                                                                                                                                                                                                                                                                                                                                                                                                                                                                                                                                                                                                                                                                                                                                                                                                                                                                                                                                                                                                                                                                                                                                                                                                                                                                                                                                                                                                                                                                                                                                                                                                                                                                                                                                                                                                                                                                                                                                                                                                                                                                                                                                                                                                                                                                                                                                                                                                                                                                                                                                                                                                                                                                                                                                                                                                                                                                                                                                                                                                                                                                                                                                                                                                                                                                                                                                                                                                                                                                                                                                                                                                                                                                                                                                                                                                                                                                                                                                                                                                                                                                                                                                                                                                                                                                                                                                                                                                                                                                                                                                                                                                                                 | -8.52  | 52.00 | 5.54 | P | IN  |
| QLO0892 | Methyl perfluoropentyl ketone                                                                           | 2708-07-8    | CC(=O)C(F)(F)(F)(F)(C)(F)(F)(C)(F)(F)(F)                                                                                                                                                                                                                                                                                                                                                                                                                                                                                                                                                                                                                                                                                                                                                                                                                                                                                                                                                                                                                                                                                                                                                                                                                                                                                                                                                                                                                                                                                                                                                                                                                                                                                                                                                                                                                                                                                                                                                                                                                                                                                                                                                                                                                                                                                                                                                                                                                                                                                                                                                                                                                                                                                                                                                                                                                                                                                                                                                                                                                                                                                                                                                                                                                                                                                                                                                                                                                                                                                                                                                                                                                                                                                                                                                                                                                                                                                                                                                                                                                                                                                                                                                                                                                                                                                                                                                                                                                                                                                                                                                                                                                                                                                                                                                                                                                                                             | -7.87  | 50.00 | 5.25 | P | IN  |
| QLO0893 | Methyl perfluorobutyl ketone                                                                            | 678-18-2     | CC(=O)C(F)(F)(F)(F)(C)(F)(F)(C)(F)(F)(F)                                                                                                                                                                                                                                                                                                                                                                                                                                                                                                                                                                                                                                                                                                                                                                                                                                                                                                                                                                                                                                                                                                                                                                                                                                                                                                                                                                                                                                                                                                                                                                                                                                                                                                                                                                                                                                                                                                                                                                                                                                                                                                                                                                                                                                                                                                                                                                                                                                                                                                                                                                                                                                                                                                                                                                                                                                                                                                                                                                                                                                                                                                                                                                                                                                                                                                                                                                                                                                                                                                                                                                                                                                                                                                                                                                                                                                                                                                                                                                                                                                                                                                                                                                                                                                                                                                                                                                                                                                                                                                                                                                                                                                                                                                                                                                                                                                                             | -7.10  | 47.37 | 4.92 | P | IN  |
| QLO0894 | Methyl heptafluoropropylketone                                                                          | 355-17-9     | CC(=O)C(F)(F)(F)(F)(F)(C)(F)(F)(F)                                                                                                                                                                                                                                                                                                                                                                                                                                                                                                                                                                                                                                                                                                                                                                                                                                                                                                                                                                                                                                                                                                                                                                                                                                                                                                                                                                                                                                                                                                                                                                                                                                                                                                                                                                                                                                                                                                                                                                                                                                                                                                                                                                                                                                                                                                                                                                                                                                                                                                                                                                                                                                                                                                                                                                                                                                                                                                                                                                                                                                                                                                                                                                                                                                                                                                                                                                                                                                                                                                                                                                                                                                                                                                                                                                                                                                                                                                                                                                                                                                                                                                                                                                                                                                                                                                                                                                                                                                                                                                                                                                                                                                                                                                                                                                                                                                                                   | -6.18  | 43.75 | 4.52 | P | IN  |
| QLO0895 | Methyl perfluoroethyl ketone                                                                            | 374-41-4     | CC(=O)C(F)(F)(F)(F)(F)                                                                                                                                                                                                                                                                                                                                                                                                                                                                                                                                                                                                                                                                                                                                                                                                                                                                                                                                                                                                                                                                                                                                                                                                                                                                                                                                                                                                                                                                                                                                                                                                                                                                                                                                                                                                                                                                                                                                                                                                                                                                                                                                                                                                                                                                                                                                                                                                                                                                                                                                                                                                                                                                                                                                                                                                                                                                                                                                                                                                                                                                                                                                                                                                                                                                                                                                                                                                                                                                                                                                                                                                                                                                                                                                                                                                                                                                                                                                                                                                                                                                                                                                                                                                                                                                                                                                                                                                                                                                                                                                                                                                                                                                                                                                                                                                                                                                               | -5.01  | 38.46 | 4.03 | P | IN  |
| QLO0896 | 3,4,5,5,6,6,7,7,8,8,9,10,10-Pentadecafluorodec-3-en-2-ol                                                | 92604-91-6   | CC(=O)C(F)=C(F)(F)(F)(C)(F)(F)(C)(F)(F)(C)(F)(F)(F)                                                                                                                                                                                                                                                                                                                                                                                                                                                                                                                                                                                                                                                                                                                                                                                                                                                                                                                                                                                                                                                                                                                                                                                                                                                                                                                                                                                                                                                                                                                                                                                                                                                                                                                                                                                                                                                                                                                                                                                                                                                                                                                                                                                                                                                                                                                                                                                                                                                                                                                                                                                                                                                                                                                                                                                                                                                                                                                                                                                                                                                                                                                                                                                                                                                                                                                                                                                                                                                                                                                                                                                                                                                                                                                                                                                                                                                                                                                                                                                                                                                                                                                                                                                                                                                                                                                                                                                                                                                                                                                                                                                                                                                                                                                                                                                                                                                  | -9.21  | 51.72 | 5.86 | P | IN  |
| QLO0897 | (3Z)-4,5,5,6,6,7,7,8,8,9,10,10,11,11-Hexadecafluoroundec-4-Amino-5,6,6,7,7,7-heptafluorohept-3-en-2-one | 136909-85-8  | CC(=O)C=C(/F)(F)(C)(F)(F)(C)(F)(F)(C)(F)(F)(C)(F)(F)(F)                                                                                                                                                                                                                                                                                                                                                                                                                                                                                                                                                                                                                                                                                                                                                                                                                                                                                                                                                                                                                                                                                                                                                                                                                                                                                                                                                                                                                                                                                                                                                                                                                                                                                                                                                                                                                                                                                                                                                                                                                                                                                                                                                                                                                                                                                                                                                                                                                                                                                                                                                                                                                                                                                                                                                                                                                                                                                                                                                                                                                                                                                                                                                                                                                                                                                                                                                                                                                                                                                                                                                                                                                                                                                                                                                                                                                                                                                                                                                                                                                                                                                                                                                                                                                                                                                                                                                                                                                                                                                                                                                                                                                                                                                                                                                                                                                                              | -9.48  | 50.00 | 6.01 | P | IN  |
| QLO0898 | 1-[4-(Heptafluoropropyl)-1H-pyrrol-3-yl]ethan-1-one                                                     | 70168-24-0   | CC(=O)C=C(N)(C)(F)(F)(F)(F)(F)(F)                                                                                                                                                                                                                                                                                                                                                                                                                                                                                                                                                                                                                                                                                                                                                                                                                                                                                                                                                                                                                                                                                                                                                                                                                                                                                                                                                                                                                                                                                                                                                                                                                                                                                                                                                                                                                                                                                                                                                                                                                                                                                                                                                                                                                                                                                                                                                                                                                                                                                                                                                                                                                                                                                                                                                                                                                                                                                                                                                                                                                                                                                                                                                                                                                                                                                                                                                                                                                                                                                                                                                                                                                                                                                                                                                                                                                                                                                                                                                                                                                                                                                                                                                                                                                                                                                                                                                                                                                                                                                                                                                                                                                                                                                                                                                                                                                                                                    | -6.78  | 31.82 | 4.92 | P | IN  |
| QLO0899 | 1-[4-(1,1,2,2,3,3,3-Heptafluoropropan-2-yl)phenyl]ethan-1-ol                                            | 121103-97-7  | CC(=O)C1=CNC=C1C(F)(F)(F)(F)(F)(F)                                                                                                                                                                                                                                                                                                                                                                                                                                                                                                                                                                                                                                                                                                                                                                                                                                                                                                                                                                                                                                                                                                                                                                                                                                                                                                                                                                                                                                                                                                                                                                                                                                                                                                                                                                                                                                                                                                                                                                                                                                                                                                                                                                                                                                                                                                                                                                                                                                                                                                                                                                                                                                                                                                                                                                                                                                                                                                                                                                                                                                                                                                                                                                                                                                                                                                                                                                                                                                                                                                                                                                                                                                                                                                                                                                                                                                                                                                                                                                                                                                                                                                                                                                                                                                                                                                                                                                                                                                                                                                                                                                                                                                                                                                                                                                                                                                                                   | -8.12  | 29.17 | 5.58 | P | OUT |
| QLO0900 | 5,5,6,6,7,7,8,8,9,10,10,11,11,12,12-Heptadecafluorododec-1-ol                                           | 353273-22-0  | CC(O)c1ccc(cc1)(C)(F)(F)(F)(C)(F)(F)                                                                                                                                                                                                                                                                                                                                                                                                                                                                                                                                                                                                                                                                                                                                                                                                                                                                                                                                                                                                                                                                                                                                                                                                                                                                                                                                                                                                                                                                                                                                                                                                                                                                                                                                                                                                                                                                                                                                                                                                                                                                                                                                                                                                                                                                                                                                                                                                                                                                                                                                                                                                                                                                                                                                                                                                                                                                                                                                                                                                                                                                                                                                                                                                                                                                                                                                                                                                                                                                                                                                                                                                                                                                                                                                                                                                                                                                                                                                                                                                                                                                                                                                                                                                                                                                                                                                                                                                                                                                                                                                                                                                                                                                                                                                                                                                                                                                 | -8.36  | 26.92 | 5.71 | P | OUT |
| QLO0901 | 5,5,6,6,7,7,8,8,9,9,10,10,11,11,12,12-Heptadecafluorododec-1-ol                                         | 203201-14-3  | CC(=O)CC(=O)(C)(F)(F)(C)(F)(F)(C)(F)(F)(C)(F)(F)(C)(F)(F)                                                                                                                                                                                                                                                                                                                                                                                                                                                                                                                                                                                                                                                                                                                                                                                                                                                                                                                                                                                                                                                                                                                                                                                                                                                                                                                                                                                                                                                                                                                                                                                                                                                                                                                                                                                                                                                                                                                                                                                                                                                                                                                                                                                                                                                                                                                                                                                                                                                                                                                                                                                                                                                                                                                                                                                                                                                                                                                                                                                                                                                                                                                                                                                                                                                                                                                                                                                                                                                                                                                                                                                                                                                                                                                                                                                                                                                                                                                                                                                                                                                                                                                                                                                                                                                                                                                                                                                                                                                                                                                                                                                                                                                                                                                                                                                                                                            | -9.85  | 47.22 | 6.21 | P | IN  |
| QLO0902 | (Perfluoroheptanoyl)acetone                                                                             | 82822-26-2   | CC(=O)CC(=O)(C)(F)(F)(C)(F)(F)(C)(F)(F)(C)(F)(F)                                                                                                                                                                                                                                                                                                                                                                                                                                                                                                                                                                                                                                                                                                                                                                                                                                                                                                                                                                                                                                                                                                                                                                                                                                                                                                                                                                                                                                                                                                                                                                                                                                                                                                                                                                                                                                                                                                                                                                                                                                                                                                                                                                                                                                                                                                                                                                                                                                                                                                                                                                                                                                                                                                                                                                                                                                                                                                                                                                                                                                                                                                                                                                                                                                                                                                                                                                                                                                                                                                                                                                                                                                                                                                                                                                                                                                                                                                                                                                                                                                                                                                                                                                                                                                                                                                                                                                                                                                                                                                                                                                                                                                                                                                                                                                                                                                                     | -8.87  | 43.33 | 5.79 | P | IN  |
| QLO0903 | 5,5,6,6,7,7,8,8,9,9-Un-decafluorononane-2,4-dione                                                       | 75824-01-0   | CC(=O)CC(=O)(C)(F)(F)(C)(F)(F)(C)(F)(F)(C)(F)(F)                                                                                                                                                                                                                                                                                                                                                                                                                                                                                                                                                                                                                                                                                                                                                                                                                                                                                                                                                                                                                                                                                                                                                                                                                                                                                                                                                                                                                                                                                                                                                                                                                                                                                                                                                                                                                                                                                                                                                                                                                                                                                                                                                                                                                                                                                                                                                                                                                                                                                                                                                                                                                                                                                                                                                                                                                                                                                                                                                                                                                                                                                                                                                                                                                                                                                                                                                                                                                                                                                                                                                                                                                                                                                                                                                                                                                                                                                                                                                                                                                                                                                                                                                                                                                                                                                                                                                                                                                                                                                                                                                                                                                                                                                                                                                                                                                                                     | -8.28  | 40.74 | 5.54 | P | IN  |
| QLO0904 | (Perfluoro-1-butyl)butane-1,3-dione                                                                     | 355-84-0     | CC(=O)CC(=O)(C)(F)(F)(C)(F)(F)(C)(F)(F)(F)                                                                                                                                                                                                                                                                                                                                                                                                                                                                                                                                                                                                                                                                                                                                                                                                                                                                                                                                                                                                                                                                                                                                                                                                                                                                                                                                                                                                                                                                                                                                                                                                                                                                                                                                                                                                                                                                                                                                                                                                                                                                                                                                                                                                                                                                                                                                                                                                                                                                                                                                                                                                                                                                                                                                                                                                                                                                                                                                                                                                                                                                                                                                                                                                                                                                                                                                                                                                                                                                                                                                                                                                                                                                                                                                                                                                                                                                                                                                                                                                                                                                                                                                                                                                                                                                                                                                                                                                                                                                                                                                                                                                                                                                                                                                                                                                                                                           | -7.61  | 37.50 | 5.25 | P | IN  |
| QLO0905 | 5,5,6,6,7,7,7-heptafluoroheptane-2,4-dione                                                              | 356-30-9     | CC(=O)CC(=O)(C)(F)(F)(C)(F)(F)(C)(F)(F)                                                                                                                                                                                                                                                                                                                                                                                                                                                                                                                                                                                                                                                                                                                                                                                                                                                                                                                                                                                                                                                                                                                                                                                                                                                                                                                                                                                                                                                                                                                                                                                                                                                                                                                                                                                                                                                                                                                                                                                                                                                                                                                                                                                                                                                                                                                                                                                                                                                                                                                                                                                                                                                                                                                                                                                                                                                                                                                                                                                                                                                                                                                                                                                                                                                                                                                                                                                                                                                                                                                                                                                                                                                                                                                                                                                                                                                                                                                                                                                                                                                                                                                                                                                                                                                                                                                                                                                                                                                                                                                                                                                                                                                                                                                                                                                                                                                              | -6.81  | 33.33 | 4.92 | P | IN  |
| QLO0906 | 5,5,6,6-Tetrafluoro-5-(heptafluoropropoxyl)hexane-2,4-dione                                             | 261760-03-6  | CC(=O)CC(=O)(C)(F)(F)(C)(F)(F)(C)(F)(F)(C)(F)(F)                                                                                                                                                                                                                                                                                                                                                                                                                                                                                                                                                                                                                                                                                                                                                                                                                                                                                                                                                                                                                                                                                                                                                                                                                                                                                                                                                                                                                                                                                                                                                                                                                                                                                                                                                                                                                                                                                                                                                                                                                                                                                                                                                                                                                                                                                                                                                                                                                                                                                                                                                                                                                                                                                                                                                                                                                                                                                                                                                                                                                                                                                                                                                                                                                                                                                                                                                                                                                                                                                                                                                                                                                                                                                                                                                                                                                                                                                                                                                                                                                                                                                                                                                                                                                                                                                                                                                                                                                                                                                                                                                                                                                                                                                                                                                                                                                                                     | -8.44  | 39.29 | 5.62 | P | IN  |
| QLO0907 | 4,4,5,5,6,6,7,7,8,8,9,9-Tridecafluorononan-2-one                                                        | 77893-60-8   | CC(=O)C(F)(F)(C)(F)(F)(C)(F)(F)(C)(F)(F)(C)(F)(F)                                                                                                                                                                                                                                                                                                                                                                                                                                                                                                                                                                                                                                                                                                                                                                                                                                                                                                                                                                                                                                                                                                                                                                                                                                                                                                                                                                                                                                                                                                                                                                                                                                                                                                                                                                                                                                                                                                                                                                                                                                                                                                                                                                                                                                                                                                                                                                                                                                                                                                                                                                                                                                                                                                                                                                                                                                                                                                                                                                                                                                                                                                                                                                                                                                                                                                                                                                                                                                                                                                                                                                                                                                                                                                                                                                                                                                                                                                                                                                                                                                                                                                                                                                                                                                                                                                                                                                                                                                                                                                                                                                                                                                                                                                                                                                                                                                                    | -8.59  | 46.43 | 5.62 | P | IN  |
| QLO0908 | 4,4,5,5,6,6,7,7-Nonafluoroheptan-2-one                                                                  | 86358-19-2   | CC(=O)CC(F)(F)(C)(F)(F)(C)(F)(F)(F)                                                                                                                                                                                                                                                                                                                                                                                                                                                                                                                                                                                                                                                                                                                                                                                                                                                                                                                                                                                                                                                                                                                                                                                                                                                                                                                                                                                                                                                                                                                                                                                                                                                                                                                                                                                                                                                                                                                                                                                                                                                                                                                                                                                                                                                                                                                                                                                                                                                                                                                                                                                                                                                                                                                                                                                                                                                                                                                                                                                                                                                                                                                                                                                                                                                                                                                                                                                                                                                                                                                                                                                                                                                                                                                                                                                                                                                                                                                                                                                                                                                                                                                                                                                                                                                                                                                                                                                                                                                                                                                                                                                                                                                                                                                                                                                                                                                                  | -7.22  | 40.91 | 5.04 | P | IN  |
| QLO0909 | 3-(Perfluoropropyl)-2-propanone                                                                         | 136909-72-3  | CC(=O)CC(F)(F)(C)(F)(F)(C)(F)(F)                                                                                                                                                                                                                                                                                                                                                                                                                                                                                                                                                                                                                                                                                                                                                                                                                                                                                                                                                                                                                                                                                                                                                                                                                                                                                                                                                                                                                                                                                                                                                                                                                                                                                                                                                                                                                                                                                                                                                                                                                                                                                                                                                                                                                                                                                                                                                                                                                                                                                                                                                                                                                                                                                                                                                                                                                                                                                                                                                                                                                                                                                                                                                                                                                                                                                                                                                                                                                                                                                                                                                                                                                                                                                                                                                                                                                                                                                                                                                                                                                                                                                                                                                                                                                                                                                                                                                                                                                                                                                                                                                                                                                                                                                                                                                                                                                                                                     | -6.34  | 36.84 | 4.66 | P | IN  |
| QLO0910 | 5,5,6,6,7,7,8,8,9,10,10,11,11,12,12-Heptadecafluorododec-4-(perfluorobutyl)-2-butanone                  | 82486-22-4   | CC(=O)CCC(F)(F)(C)(F)(F)(C)(F)(F)(C)(F)(F)(C)(F)(F)(F)                                                                                                                                                                                                                                                                                                                                                                                                                                                                                                                                                                                                                                                                                                                                                                                                                                                                                                                                                                                                                                                                                                                                                                                                                                                                                                                                                                                                                                                                                                                                                                                                                                                                                                                                                                                                                                                                                                                                                                                                                                                                                                                                                                                                                                                                                                                                                                                                                                                                                                                                                                                                                                                                                                                                                                                                                                                                                                                                                                                                                                                                                                                                                                                                                                                                                                                                                                                                                                                                                                                                                                                                                                                                                                                                                                                                                                                                                                                                                                                                                                                                                                                                                                                                                                                                                                                                                                                                                                                                                                                                                                                                                                                                                                                                                                                                                                               | -9.69  | 45.95 | 6.14 | P | IN  |
| QLO0911 | N-[[4-(Bromophenyl)](perfluorobutyl)-λ4-sulfanylidene]acetami                                           | 140834-64-6  | CC(=O)C(C(F)(F)(F)(F)(F)(F)(F)(F)(F)(F)(F)(F))F                                                                                                                                                                                                                                                                                                                                                                                                                                                                                                                                                                                                                                                                                                                                                                                                                                                                                                                                                                                                                                                                                                                                                                                                                                                                                                                                                                                                                                                                                                                                                                                                                                                                                                                                                                                                                                                                                                                                                                                                                                                                                                                                                                                                                                                                                                                                                                                                                                                                                                                                                                                                                                                                                                                                                                                                                                                                                                                                                                                                                                                                                                                                                                                                                                                                                                                                                                                                                                                                                                                                                                                                                                                                                                                                                                                                                                                                                                                                                                                                                                                                                                                                                                                                                                                                                                                                                                                                                                                                                                                                                                                                                                                                                                                                                                                                                                                      | -7.35  | 36.00 | 5.15 | P | IN  |
| QLO0912 | N-[[4-(Bromophenyl)](perfluorobutyl)-λ4-sulfanylidene]acetami                                           | 1178899-27-8 | CC(=O)N=S/C1=CC=C(Br)C=C1)(C)(F)(F)(F)(C)(F)(F)(F)                                                                                                                                                                                                                                                                                                                                                                                                                                                                                                                                                                                                                                                                                                                                                                                                                                                                                                                                                                                                                                                                                                                                                                                                                                                                                                                                                                                                                                                                                                                                                                                                                                                                                                                                                                                                                                                                                                                                                                                                                                                                                                                                                                                                                                                                                                                                                                                                                                                                                                                                                                                                                                                                                                                                                                                                                                                                                                                                                                                                                                                                                                                                                                                                                                                                                                                                                                                                                                                                                                                                                                                                                                                                                                                                                                                                                                                                                                                                                                                                                                                                                                                                                                                                                                                                                                                                                                                                                                                                                                                                                                                                                                                                                                                                                                                                                                                   | -9.32  | 31.25 | 6.12 | P | OUT |
| QLO0913 | N-(Perfluorobutyl)phenyl-lambda4-sulfanylidene]acetamide                                                | 1178899-18-7 | CC(=O)N=S/C1=CC=C(C=C1)C(F)(F)(F)(C)(F)(F)(F)(F)                                                                                                                                                                                                                                                                                                                                                                                                                                                                                                                                                                                                                                                                                                                                                                                                                                                                                                                                                                                                                                                                                                                                                                                                                                                                                                                                                                                                                                                                                                                                                                                                                                                                                                                                                                                                                                                                                                                                                                                                                                                                                                                                                                                                                                                                                                                                                                                                                                                                                                                                                                                                                                                                                                                                                                                                                                                                                                                                                                                                                                                                                                                                                                                                                                                                                                                                                                                                                                                                                                                                                                                                                                                                                                                                                                                                                                                                                                                                                                                                                                                                                                                                                                                                                                                                                                                                                                                                                                                                                                                                                                                                                                                                                                                                                                                                                                                     | -9.02  | 28.13 | 6.01 | P | OUT |
| QLO0914 | Pyrrfluquinazon                                                                                         | 337458-27-2  | CC(=O)N1C2=C(CN(C1=O)NCC3=CN=CC=C3)C=C(C=C2)C(F)(F)(F)(F)(F)                                                                                                                                                                                                                                                                                                                                                                                                                                                                                                                                                                                                                                                                                                                                                                                                                                                                                                                                                                                                                                                                                                                                                                                                                                                                                                                                                                                                                                                                                                                                                                                                                                                                                                                                                                                                                                                                                                                                                                                                                                                                                                                                                                                                                                                                                                                                                                                                                                                                                                                                                                                                                                                                                                                                                                                                                                                                                                                                                                                                                                                                                                                                                                                                                                                                                                                                                                                                                                                                                                                                                                                                                                                                                                                                                                                                                                                                                                                                                                                                                                                                                                                                                                                                                                                                                                                                                                                                                                                                                                                                                                                                                                                                                                                                                                                                                                         | -12.14 | 14.89 | 7.60 | P | OUT |
| QLO0915 | 1-[3-Methylidene-4-(2,2,3,3,4,4,5,5-nonafluoropentyl)pyrrol                                             | 31164-13-3   | CC(=O)N1CC(C(F)(F)(F)(F)(F)(F)(F)(F)(F)(F)(F)(F))C=C1                                                                                                                                                                                                                                                                                                                                                                                                                                                                                                                                                                                                                                                                                                                                                                                                                                                                                                                                                                                                                                                                                                                                                                                                                                                                                                                                                                                                                                                                                                                                                                                                                                                                                                                                                                                                                                                                                                                                                                                                                                                                                                                                                                                                                                                                                                                                                                                                                                                                                                                                                                                                                                                                                                                                                                                                                                                                                                                                                                                                                                                                                                                                                                                                                                                                                                                                                                                                                                                                                                                                                                                                                                                                                                                                                                                                                                                                                                                                                                                                                                                                                                                                                                                                                                                                                                                                                                                                                                                                                                                                                                                                                                                                                                                                                                                                                                                | -9.03  | 25.71 | 6.04 | P | OUT |
| QLO0916 | 1-Acetyl-3,5-bis(perfluorohexyl)pyrazole                                                                | 231953-34-7  | CC(=O)N1N=C(C=O)C(F)(F)(F)(F)(F)(F)(F)(F)(F)(F)(F)(F)                                                                                                                                                                                                                                                                                                                                                                                                                                                                                                                                                                                                                                                                                                                                                                                                                                                                                                                                                                                                                                                                                                                                                                                                                                                                                                                                                                                                                                                                                                                                                                                                                                                                                                                                                                                                                                                                                                                                                                                                                                                                                                                                                                                                                                                                                                                                                                                                                                                                                                                                                                                                                                                                                                                                                                                                                                                                                                                                                                                                                                                                                                                                                                                                                                                                                                                                                                                                                                                                                                                                                                                                                                                                                                                                                                                                                                                                                                                                                                                                                                                                                                                                                                                                                                                                                                                                                                                                                                                                                                                                                                                                                                                                                                                                                                                                                                                | -12.61 | 52.00 | 7.46 | P | OUT |
| QLO0917 | N,N'-(5-[(1,1,1,4,4,5,5,5-heptafluoro-3,1,1,1,2,3,3,3-heptafluor                                        | Q103475      | CC(=O)Nc1cc(NC(C)=O)cc(OC(=C(C(F)(C)(F)(F)(F)(F)(F)(F)(F)(F)(F)(F)(F)(F)(F)(F)(F)(F)(F)(F)(F)(F)(F)(F)(F)(F)(F)(F)(F)(F)(F)(F)(F)(F)(F)(F)(F)(F)(F)(F)(F)(F)(F)(F)(F)(F)(F)(F)(F)(F)(F)(F)(F)(F)(F)(F)(F)(F)(F)(F)(F)(F)(F)(F)(F)(F)(F)(F)(F)(F)(F)(F)(F)(F)(F)(F)(F)(F)(F)(F)(F)(F)(F)(F)(F)(F)(F)(F)(F)(F)(F)(F)(F)(F)(F)(F)(F)(F)(F)(F)(F)(F)(F)(F)(F)(F)(F)(F)(F)(F)(F)(F)(F)(F)(F)(F)(F)(F)(F)(F)(F)(F)(F)(F)(F)(F)(F)(F)(F)(F)(F)(F)(F)(F)(F)(F)(F)(F)(F)(F)(F)(F)(F)(F)(F)(F)(F)(F)(F)(F)(F)(F)(F)(F)(F)(F)(F)(F)(F)(F)(F)(F)(F)(F)(F)(F)(F)(F)(F)(F)(F)(F)(F)(F)(F)(F)(F)(F)(F)(F)(F)(F)(F)(F)(F)(F)(F)(F)(F)(F)(F)(F)(F)(F)(F)(F)(F)(F)(F)(F)(F)(F)(F)(F)(F)(F)(F)(F)(F)(F)(F)(F)(F)(F)(F)(F)(F)(F)(F)(F)(F)(F)(F)(F)(F)(F)(F)(F)(F)(F)(F)(F)(F)(F)(F)(F)(F)(F)(F)(F)(F)(F)(F)(F)(F)(F)(F)(F)(F)(F)(F)(F)(F)(F)(F)(F)(F)(F)(F)(F)(F)(F)(F)(F)(F)(F)(F)(F)(F)(F)(F)(F)(F)(F)(F)(F)(F)(F)(F)(F)(F)(F)(F)(F)(F)(F)(F)(F)(F)(F)(F)(F)(F)(F)(F)(F)(F)(F)(F)(F)(F)(F)(F)(F)(F)(F)(F)(F)(F)(F)(F)(F)(F)(F)(F)(F)(F)(F)(F)(F)(F)(F)(F)(F)(F)(F)(F)(F)(F)(F)(F)(F)(F)(F)(F)(F)(F)(F)(F)(F)(F)(F)(F)(F)(F)(F)(F)(F)(F)(F)(F)(F)(F)(F)(F)(F)(F)(F)(F)(F)(F)(F)(F)(F)(F)(F)(F)(F)(F)(F)(F)(F)(F)(F)(F)(F)(F)(F)(F)(F)(F)(F)(F)(F)(F)(F)(F)(F)(F)(F)(F)(F)(F)(F)(F)(F)(F)(F)(F)(F)(F)(F)(F)(F)(F)(F)(F)(F)(F)(F)(F)(F)(F)(F)(F)(F)(F)(F)(F)(F)(F)(F)(F)(F)(F)(F)(F)(F)(F)(F)(F)(F)(F)(F)(F)(F)(F)(F)(F)(F)(F)(F)(F)(F)(F)(F)(F)(F)(F)(F)(F)(F)(F)(F)(F)(F)(F)(F)(F)(F)(F)(F)(F)(F)(F)(F)(F)(F)(F)(F)(F)(F)(F)(F)(F)(F)(F)(F)(F)(F)(F)(F)(F)(F)(F)(F)(F)(F)(F)(F)(F)(F)(F)(F)(F)(F)(F)(F)(F)(F)(F)(F)(F)(F)(F)(F)(F)(F)(F)(F)(F)(F)(F)(F)(F)(F)(F)(F)(F)(F)(F)(F)(F)(F)(F)(F)(F)(F)(F)(F)(F)(F)(F)(F)(F)(F)(F)(F)(F)(F)(F)(F)(F)(F)(F)(F)(F)(F)(F)(F)(F)(F)(F)(F)(F)(F)(F)(F)(F)(F)(F)(F)(F)(F)(F)(F)(F)(F)(F)(F)(F)(F)(F)(F)(F)(F)(F)(F)(F)(F)(F)(F)(F)(F)(F)(F)(F)(F)(F)(F)(F)(F)(F)(F)(F)(F)(F)(F)(F)(F)(F)(F)(F)(F)(F)(F)(F)(F)(F)(F)(F)(F)(F)(F)(F)(F)(F)(F)(F)(F)(F)(F)(F)(F)(F)(F)(F)(F)(F)(F)(F)(F)(F)(F)(F)(F)(F)(F)(F)(F)(F)(F)(F)(F)(F)(F)(F)(F)(F)(F)(F)(F)(F)(F)(F)(F)(F)(F)(F)(F)(F)(F)(F)(F)(F)(F)(F)(F)(F)(F)(F)(F)(F)(F)(F)(F)(F)(F)(F)(F)(F)(F)(F)(F)(F)(F)(F)(F)(F)(F)(F)(F)(F)(F)(F)(F)(F)(F)(F)(F)(F)(F)(F)(F)(F)(F)(F)(F)(F)(F)(F)(F)(F)(F)(F)(F)(F)(F)(F)(F)(F)(F)(F)(F)(F)(F)(F)(F)(F)(F)(F)(F)(F)(F)(F)(F)(F)(F)(F)(F)(F)(F)(F)(F)(F)(F)(F)(F)(F)(F)(F)(F)(F)(F)(F)(F)(F)(F)(F)(F)(F)(F)(F)(F)(F)(F)(F)(F)(F)(F)(F)(F)(F)(F)(F)(F)(F)(F)(F)(F)(F)(F)(F)(F)(F)(F)(F)(F)(F)(F)(F)(F)(F)(F)(F)(F)(F)(F)(F)(F)(F)(F)(F)(F)(F)(F)(F)(F)(F)(F)(F)(F)(F)(F)(F)(F)(F)(F)(F)(F)(F)(F)(F)(F)(F)(F)(F)(F)(F)(F)(F)(F)(F)(F)(F)(F)(F)(F)(F)(F)(F)(F)(F)(F)(F)(F)(F)(F)(F)(F)(F)(F)(F)(F)(F)(F)(F)(F)(F)(F)(F)(F)(F)(F)(F)(F)(F)(F)(F)(F)(F)(F)(F)(F)(F)(F)(F)(F)(F)(F)(F)(F)(F)(F)(F)(F)(F)(F)(F)(F)(F)(F)(F)(F)(F)(F)(F)(F)(F)(F)(F)(F)(F)(F)(F)(F)(F)(F)(F)(F)(F)(F)(F)(F)(F)(F)(F)(F)(F)(F)(F)(F)(F)(F)(F)(F)(F)(F)(F)(F)(F)(F)(F)(F)(F)(F)(F)(F)(F)(F)(F)(F)(F)(F)(F)(F)(F)(F)(F)(F)(F)(F)(F)(F)(F)(F)(F)(F)(F)(F)(F)(F)(F)(F)(F)(F)(F)(F)(F)(F)(F)(F)(F)(F)(F)(F)(F)(F)(F)(F)(F)(F)(F)(F)(F)(F)(F)(F)(F)(F)(F)(F)(F)(F)(F)(F)(F)(F)(F)(F)(F)(F)(F)(F)(F)(F)(F)(F)(F)(F)(F)(F)(F)(F)(F)(F)(F)(F)(F)(F)(F)(F)(F)(F)(F)(F)(F)(F)(F)(F)(F)(F)(F)(F)(F)(F)(F)(F)(F)(F)(F)(F)(F)(F)(F)(F)(F)(F)(F)(F)(F)(F)(F)(F)(F)(F)(F)(F)(F)(F)(F)(F)(F)(F)(F)(F)(F)(F)(F)(F)(F)(F)(F)(F)(F)(F)(F)(F)(F)(F)(F)(F)(F)(F)(F)(F)(F)(F)(F)(F)(F)(F)(F)(F)(F)(F)(F)(F)(F)(F)(F)(F)(F)(F)(F)(F)(F)(F)(F)(F)(F)(F)(F)(F)(F)(F)(F)(F)(F)(F)(F)(F)(F)(F)(F)(F)(F)(F)(F)(F)(F)(F)(F)(F)(F)(F)(F)(F)(F)(F)(F)(F)(F)(F)(F)(F)(F)(F)(F)(F)(F)(F)(F)(F)(F)(F)(F)(F)(F)(F)(F)(F)(F)(F)(F)(F)(F)(F)(F)(F)(F)(F)(F)(F)(F)(F)(F)(F)(F)(F)(F)(F)(F)(F)(F)(F)(F)(F)(F)(F)(F)(F)(F)(F)(F)(F)(F)(F)(F)(F)(F)(F)(F)(F)(F)(F)(F)(F)(F)(F)(F)(F)(F)(F)(F)(F)(F)(F)(F)(F)(F)(F)(F)(F)(F)(F)(F)(F)(F)(F)(F)(F)(F)(F)(F)(F)(F)(F)(F)(F)(F)(F)(F)(F)(F)(F)(F)(F)(F)(F)(F)(F)(F)(F)(F)(F)(F)(F)(F)(F)(F)(F)(F)(F)(F)(F)(F)(F)(F)(F)(F)(F)(F)(F)(F)(F)(F)(F)(F)(F)(F)(F)(F)(F)(F)(F)(F)(F)(F)(F)(F)(F)(F)(F)(F)(F)(F)(F)(F)(F)(F)(F)(F)(F)(F)(F)(F)(F)(F)(F)(F)(F)(F)(F)(F)(F)(F)(F)(F)(F)(F)(F)(F)(F)(F)(F)(F)(F)(F)(F)(F)(F)(F)(F)(F)(F)(F)(F)(F)(F)(F)(F)(F)(F)(F)(F)(F)(F)(F)(F)(F)(F)(F)(F)(F)(F)(F)(F)(F)(F)(F)(F)(F)(F)(F)(F)(F)(F)(F)(F)(F)(F)(F)(F)(F)(F)(F)(F)(F)(F)(F)(F)(F)(F)(F)(F)(F)(F)(F)(F)(F)(F)(F)(F)(F)(F)(F)(F)(F)(F)(F)(F)(F)(F)(F)(F)(F)(F)(F)(F)(F)(F)(F)(F)(F)(F)(F)(F)(F)(F)(F)(F)(F)(F)(F)(F)(F)(F)(F)(F)(F)(F)(F)(F)(F)(F)(F)(F)(F)(F)(F)(F)(F)(F)(F)(F)(F)(F)(F)(F)(F)(F)(F)(F)(F)(F)(F)(F)(F)(F)(F)(F)(F)(F)(F)(F)(F)(F)(F)(F)(F)(F)(F)(F)(F)(F)(F)(F)(F)(F)(F)(F)(F)(F)(F)(F)(F)(F)(F)(F)(F)(F)(F)(F)(F)(F)(F)(F)(F)(F)(F)(F)(F)(F)(F)(F)(F)(F)(F)(F)(F)(F)(F)(F)(F)(F)(F)(F)(F)(F)(F)(F)(F)(F)(F)(F)(F)(F)(F)(F)(F)(F)(F)(F)(F)(F)(F)(F)(F)(F)(F)(F)(F)(F)(F)(F)(F)(F)(F)(F)(F)(F)(F)(F)(F)(F)(F)(F)(F)( |        |       |      |   |     |



[illegible]







[illegible]



[illegible]



[illegible]



|         |                                                                 |              |                                                                                                                                                                                                                                                                                                                                                                                                                                                                                                                                                                                                                                                                                                                                                                                                                                                                                                                                                                                                                                                                                                                                                                                                                                                                                                                                                                                                                                                                                                                                                                                                                                                                                                                                                                                                                                                                                                                                                                                                                                                                                                                                                                                                                                                                                                                                                                                                                                                                                                                                                                                                                                                                                                                                                                                                                                                                                                                                                                                                                                                                                                                                                                                                                                                                                                                                                                                                                                                                                                                                                                                                                                                                                                                                                                                                                                                                                                                                                                                                                                                                                                                                                                                                                                                                                                                                                                                                                                                                                                                                                                                                                                                                                                                                                                                                                                                                                                     |        |       |      |   |     |
|---------|-----------------------------------------------------------------|--------------|-----------------------------------------------------------------------------------------------------------------------------------------------------------------------------------------------------------------------------------------------------------------------------------------------------------------------------------------------------------------------------------------------------------------------------------------------------------------------------------------------------------------------------------------------------------------------------------------------------------------------------------------------------------------------------------------------------------------------------------------------------------------------------------------------------------------------------------------------------------------------------------------------------------------------------------------------------------------------------------------------------------------------------------------------------------------------------------------------------------------------------------------------------------------------------------------------------------------------------------------------------------------------------------------------------------------------------------------------------------------------------------------------------------------------------------------------------------------------------------------------------------------------------------------------------------------------------------------------------------------------------------------------------------------------------------------------------------------------------------------------------------------------------------------------------------------------------------------------------------------------------------------------------------------------------------------------------------------------------------------------------------------------------------------------------------------------------------------------------------------------------------------------------------------------------------------------------------------------------------------------------------------------------------------------------------------------------------------------------------------------------------------------------------------------------------------------------------------------------------------------------------------------------------------------------------------------------------------------------------------------------------------------------------------------------------------------------------------------------------------------------------------------------------------------------------------------------------------------------------------------------------------------------------------------------------------------------------------------------------------------------------------------------------------------------------------------------------------------------------------------------------------------------------------------------------------------------------------------------------------------------------------------------------------------------------------------------------------------------------------------------------------------------------------------------------------------------------------------------------------------------------------------------------------------------------------------------------------------------------------------------------------------------------------------------------------------------------------------------------------------------------------------------------------------------------------------------------------------------------------------------------------------------------------------------------------------------------------------------------------------------------------------------------------------------------------------------------------------------------------------------------------------------------------------------------------------------------------------------------------------------------------------------------------------------------------------------------------------------------------------------------------------------------------------------------------------------------------------------------------------------------------------------------------------------------------------------------------------------------------------------------------------------------------------------------------------------------------------------------------------------------------------------------------------------------------------------------------------------------------------------------------------------|--------|-------|------|---|-----|
| QLO1296 | 8,8,9,9,10,10,11,11,12,12,13,13,14,14,14-Pentadecafluorotetr    | 38787-60-9   | CCCCC=CC(F)(F)C(F)(F)C(F)(F)C(F)(F)C(F)(F)C(F)(F)F                                                                                                                                                                                                                                                                                                                                                                                                                                                                                                                                                                                                                                                                                                                                                                                                                                                                                                                                                                                                                                                                                                                                                                                                                                                                                                                                                                                                                                                                                                                                                                                                                                                                                                                                                                                                                                                                                                                                                                                                                                                                                                                                                                                                                                                                                                                                                                                                                                                                                                                                                                                                                                                                                                                                                                                                                                                                                                                                                                                                                                                                                                                                                                                                                                                                                                                                                                                                                                                                                                                                                                                                                                                                                                                                                                                                                                                                                                                                                                                                                                                                                                                                                                                                                                                                                                                                                                                                                                                                                                                                                                                                                                                                                                                                                                                                                                                  | -9.33  | 35.71 | 6.08 | P | IN  |
| QLO1297 | (6E)-8,8,9,9,10,10,11,11,12,12,13,13,13-Tridecafluorotridec-6-  | 350608-60-5  | CCCCC=CC(F)(F)C(F)(F)C(F)(F)C(F)(F)C(F)(F)C(F)(F)F                                                                                                                                                                                                                                                                                                                                                                                                                                                                                                                                                                                                                                                                                                                                                                                                                                                                                                                                                                                                                                                                                                                                                                                                                                                                                                                                                                                                                                                                                                                                                                                                                                                                                                                                                                                                                                                                                                                                                                                                                                                                                                                                                                                                                                                                                                                                                                                                                                                                                                                                                                                                                                                                                                                                                                                                                                                                                                                                                                                                                                                                                                                                                                                                                                                                                                                                                                                                                                                                                                                                                                                                                                                                                                                                                                                                                                                                                                                                                                                                                                                                                                                                                                                                                                                                                                                                                                                                                                                                                                                                                                                                                                                                                                                                                                                                                                                  | -8.82  | 33.33 | 5.86 | P | OUT |
| QLO1298 | 1,1,1,2,2,3,3,4,4-Nonafluoroundec-5-ene                         | 383145-46-8  | CCCCC=CC(F)(F)C(F)(F)C(F)(F)C(F)(F)F                                                                                                                                                                                                                                                                                                                                                                                                                                                                                                                                                                                                                                                                                                                                                                                                                                                                                                                                                                                                                                                                                                                                                                                                                                                                                                                                                                                                                                                                                                                                                                                                                                                                                                                                                                                                                                                                                                                                                                                                                                                                                                                                                                                                                                                                                                                                                                                                                                                                                                                                                                                                                                                                                                                                                                                                                                                                                                                                                                                                                                                                                                                                                                                                                                                                                                                                                                                                                                                                                                                                                                                                                                                                                                                                                                                                                                                                                                                                                                                                                                                                                                                                                                                                                                                                                                                                                                                                                                                                                                                                                                                                                                                                                                                                                                                                                                                                | -7.61  | 27.27 | 5.35 | P | OUT |
| QLO1299 | (4E)-1,1,1,2,2,3,3-Heptafluorodec-4-ene                         | 57325-42-5   | CCCCC=CC(F)(F)C(F)(F)C(F)(F)F                                                                                                                                                                                                                                                                                                                                                                                                                                                                                                                                                                                                                                                                                                                                                                                                                                                                                                                                                                                                                                                                                                                                                                                                                                                                                                                                                                                                                                                                                                                                                                                                                                                                                                                                                                                                                                                                                                                                                                                                                                                                                                                                                                                                                                                                                                                                                                                                                                                                                                                                                                                                                                                                                                                                                                                                                                                                                                                                                                                                                                                                                                                                                                                                                                                                                                                                                                                                                                                                                                                                                                                                                                                                                                                                                                                                                                                                                                                                                                                                                                                                                                                                                                                                                                                                                                                                                                                                                                                                                                                                                                                                                                                                                                                                                                                                                                                                       | -6.85  | 23.33 | 5.04 | P | OUT |
| QLO1300 | 5-Pentyl-2-[4-(tridecafluorohexyl)phenyl]pyridine               | 139030-54-9  | CCCCCc1ccc(nc1)-c1ccc(cc1)C(F)(F)C(F)(F)C(F)(F)C(F)(F)C(F)(F)F                                                                                                                                                                                                                                                                                                                                                                                                                                                                                                                                                                                                                                                                                                                                                                                                                                                                                                                                                                                                                                                                                                                                                                                                                                                                                                                                                                                                                                                                                                                                                                                                                                                                                                                                                                                                                                                                                                                                                                                                                                                                                                                                                                                                                                                                                                                                                                                                                                                                                                                                                                                                                                                                                                                                                                                                                                                                                                                                                                                                                                                                                                                                                                                                                                                                                                                                                                                                                                                                                                                                                                                                                                                                                                                                                                                                                                                                                                                                                                                                                                                                                                                                                                                                                                                                                                                                                                                                                                                                                                                                                                                                                                                                                                                                                                                                                                      | -11.83 | 24.07 | 7.36 | P | OUT |
| QLO1301 | Octan-2-yl heptafluorobutanoate                                 | 560-01-0     | CCCCCCC(C)OC(=O)C(F)(F)C(F)(F)C(F)(F)F                                                                                                                                                                                                                                                                                                                                                                                                                                                                                                                                                                                                                                                                                                                                                                                                                                                                                                                                                                                                                                                                                                                                                                                                                                                                                                                                                                                                                                                                                                                                                                                                                                                                                                                                                                                                                                                                                                                                                                                                                                                                                                                                                                                                                                                                                                                                                                                                                                                                                                                                                                                                                                                                                                                                                                                                                                                                                                                                                                                                                                                                                                                                                                                                                                                                                                                                                                                                                                                                                                                                                                                                                                                                                                                                                                                                                                                                                                                                                                                                                                                                                                                                                                                                                                                                                                                                                                                                                                                                                                                                                                                                                                                                                                                                                                                                                                                              | -7.62  | 18.42 | 5.45 | P | OUT |
| QLO1302 | 1-bromo-1,1,2,2-tetrafluorooctane                               | 231630-92-5  | CCCCCCC(F)(F)C(F)(F)Br                                                                                                                                                                                                                                                                                                                                                                                                                                                                                                                                                                                                                                                                                                                                                                                                                                                                                                                                                                                                                                                                                                                                                                                                                                                                                                                                                                                                                                                                                                                                                                                                                                                                                                                                                                                                                                                                                                                                                                                                                                                                                                                                                                                                                                                                                                                                                                                                                                                                                                                                                                                                                                                                                                                                                                                                                                                                                                                                                                                                                                                                                                                                                                                                                                                                                                                                                                                                                                                                                                                                                                                                                                                                                                                                                                                                                                                                                                                                                                                                                                                                                                                                                                                                                                                                                                                                                                                                                                                                                                                                                                                                                                                                                                                                                                                                                                                                              | -5.67  | 19.23 | 4.52 | P | OUT |
| QLO1303 | 1,1,1,2,2,3,3,4,4,5,5,6,6,7,7,8,8,9,9,10,10,11,11,12,12-Pentaco | 89109-70-6   | CCCCCCCC(F)(F)C(F)(F)C(F)(F)C(F)(F)C(F)(F)C(F)(F)C(F)(F)C(F)(F)F                                                                                                                                                                                                                                                                                                                                                                                                                                                                                                                                                                                                                                                                                                                                                                                                                                                                                                                                                                                                                                                                                                                                                                                                                                                                                                                                                                                                                                                                                                                                                                                                                                                                                                                                                                                                                                                                                                                                                                                                                                                                                                                                                                                                                                                                                                                                                                                                                                                                                                                                                                                                                                                                                                                                                                                                                                                                                                                                                                                                                                                                                                                                                                                                                                                                                                                                                                                                                                                                                                                                                                                                                                                                                                                                                                                                                                                                                                                                                                                                                                                                                                                                                                                                                                                                                                                                                                                                                                                                                                                                                                                                                                                                                                                                                                                                                                    | -11.17 | 44.64 | 6.85 | P | OUT |
| QLO1304 | 1,1,1,2,2,3,3,4,4,5,5,6,6,7,7,8,8,9,9,10,10-Henicosafluorohexa  | 116177-54-9  | CCCCCCCC(F)(F)C(F)(F)C(F)(F)C(F)(F)C(F)(F)C(F)(F)C(F)(F)C(F)(F)F                                                                                                                                                                                                                                                                                                                                                                                                                                                                                                                                                                                                                                                                                                                                                                                                                                                                                                                                                                                                                                                                                                                                                                                                                                                                                                                                                                                                                                                                                                                                                                                                                                                                                                                                                                                                                                                                                                                                                                                                                                                                                                                                                                                                                                                                                                                                                                                                                                                                                                                                                                                                                                                                                                                                                                                                                                                                                                                                                                                                                                                                                                                                                                                                                                                                                                                                                                                                                                                                                                                                                                                                                                                                                                                                                                                                                                                                                                                                                                                                                                                                                                                                                                                                                                                                                                                                                                                                                                                                                                                                                                                                                                                                                                                                                                                                                                    | -10.49 | 42.00 | 6.56 | P | IN  |
| QLO1305 | 1,1,1,2,2,3,3,4,4,5,5,6,6,7,7,8,8-Heptadecafluorotetradecane    | 182130-14-9  | CCCCCCCC(F)(F)C(F)(F)C(F)(F)C(F)(F)C(F)(F)C(F)(F)C(F)(F)F                                                                                                                                                                                                                                                                                                                                                                                                                                                                                                                                                                                                                                                                                                                                                                                                                                                                                                                                                                                                                                                                                                                                                                                                                                                                                                                                                                                                                                                                                                                                                                                                                                                                                                                                                                                                                                                                                                                                                                                                                                                                                                                                                                                                                                                                                                                                                                                                                                                                                                                                                                                                                                                                                                                                                                                                                                                                                                                                                                                                                                                                                                                                                                                                                                                                                                                                                                                                                                                                                                                                                                                                                                                                                                                                                                                                                                                                                                                                                                                                                                                                                                                                                                                                                                                                                                                                                                                                                                                                                                                                                                                                                                                                                                                                                                                                                                           | -9.67  | 38.64 | 6.21 | P | IN  |
| QLO1306 | 1,1,1,2,2,3,3,4,4,5,5,6,6,7,7-Pentadecafluorotridecane          | 169331-74-2  | CCCCCCCC(F)(F)C(F)(F)C(F)(F)C(F)(F)C(F)(F)C(F)(F)F                                                                                                                                                                                                                                                                                                                                                                                                                                                                                                                                                                                                                                                                                                                                                                                                                                                                                                                                                                                                                                                                                                                                                                                                                                                                                                                                                                                                                                                                                                                                                                                                                                                                                                                                                                                                                                                                                                                                                                                                                                                                                                                                                                                                                                                                                                                                                                                                                                                                                                                                                                                                                                                                                                                                                                                                                                                                                                                                                                                                                                                                                                                                                                                                                                                                                                                                                                                                                                                                                                                                                                                                                                                                                                                                                                                                                                                                                                                                                                                                                                                                                                                                                                                                                                                                                                                                                                                                                                                                                                                                                                                                                                                                                                                                                                                                                                                  | -9.20  | 36.59 | 6.01 | P | IN  |
| QLO1307 | 1,1,1,2,2,3,3,4,4,5,5,6,6-Tridecafluorododecane                 | 69125-50-0   | CCCCCCCC(F)(F)C(F)(F)C(F)(F)C(F)(F)C(F)(F)F                                                                                                                                                                                                                                                                                                                                                                                                                                                                                                                                                                                                                                                                                                                                                                                                                                                                                                                                                                                                                                                                                                                                                                                                                                                                                                                                                                                                                                                                                                                                                                                                                                                                                                                                                                                                                                                                                                                                                                                                                                                                                                                                                                                                                                                                                                                                                                                                                                                                                                                                                                                                                                                                                                                                                                                                                                                                                                                                                                                                                                                                                                                                                                                                                                                                                                                                                                                                                                                                                                                                                                                                                                                                                                                                                                                                                                                                                                                                                                                                                                                                                                                                                                                                                                                                                                                                                                                                                                                                                                                                                                                                                                                                                                                                                                                                                                                         | -8.68  | 34.21 | 5.79 | P | IN  |
| QLO1308 | 1,1,1,2,2,3,3,4,4,5,5-Undecafluoroundecane                      | 1287702-80-4 | CCCCCCC(F)(F)C(F)(F)C(F)(F)C(F)(F)C(F)(F)F                                                                                                                                                                                                                                                                                                                                                                                                                                                                                                                                                                                                                                                                                                                                                                                                                                                                                                                                                                                                                                                                                                                                                                                                                                                                                                                                                                                                                                                                                                                                                                                                                                                                                                                                                                                                                                                                                                                                                                                                                                                                                                                                                                                                                                                                                                                                                                                                                                                                                                                                                                                                                                                                                                                                                                                                                                                                                                                                                                                                                                                                                                                                                                                                                                                                                                                                                                                                                                                                                                                                                                                                                                                                                                                                                                                                                                                                                                                                                                                                                                                                                                                                                                                                                                                                                                                                                                                                                                                                                                                                                                                                                                                                                                                                                                                                                                                          | -8.09  | 31.43 | 5.54 | P | OUT |
| QLO1309 | 1,1,1,2,2,3,3,4,4-Nonafluorodecane                              | 1190430-19-3 | CCCCCCC(F)(F)C(F)(F)C(F)(F)C(F)(F)F                                                                                                                                                                                                                                                                                                                                                                                                                                                                                                                                                                                                                                                                                                                                                                                                                                                                                                                                                                                                                                                                                                                                                                                                                                                                                                                                                                                                                                                                                                                                                                                                                                                                                                                                                                                                                                                                                                                                                                                                                                                                                                                                                                                                                                                                                                                                                                                                                                                                                                                                                                                                                                                                                                                                                                                                                                                                                                                                                                                                                                                                                                                                                                                                                                                                                                                                                                                                                                                                                                                                                                                                                                                                                                                                                                                                                                                                                                                                                                                                                                                                                                                                                                                                                                                                                                                                                                                                                                                                                                                                                                                                                                                                                                                                                                                                                                                                 | -7.41  | 28.13 | 5.25 | P | OUT |
| QLO1310 | 1,1,1,2,2,3,3-Heptafluorononane                                 | 755-89-5     | CCCCCCC(F)(F)C(F)(F)C(F)(F)F                                                                                                                                                                                                                                                                                                                                                                                                                                                                                                                                                                                                                                                                                                                                                                                                                                                                                                                                                                                                                                                                                                                                                                                                                                                                                                                                                                                                                                                                                                                                                                                                                                                                                                                                                                                                                                                                                                                                                                                                                                                                                                                                                                                                                                                                                                                                                                                                                                                                                                                                                                                                                                                                                                                                                                                                                                                                                                                                                                                                                                                                                                                                                                                                                                                                                                                                                                                                                                                                                                                                                                                                                                                                                                                                                                                                                                                                                                                                                                                                                                                                                                                                                                                                                                                                                                                                                                                                                                                                                                                                                                                                                                                                                                                                                                                                                                                                        | -6.62  | 24.14 | 4.92 | P | OUT |
| QLO1311 | (5E)-1,1,1,2,2,3,3,4,4-Nonafluoro-6-iodododec-5-ene             | 109574-88-1  | CCCCCCC(I)=C(F)(F)C(F)(F)C(F)(F)C(F)(F)F                                                                                                                                                                                                                                                                                                                                                                                                                                                                                                                                                                                                                                                                                                                                                                                                                                                                                                                                                                                                                                                                                                                                                                                                                                                                                                                                                                                                                                                                                                                                                                                                                                                                                                                                                                                                                                                                                                                                                                                                                                                                                                                                                                                                                                                                                                                                                                                                                                                                                                                                                                                                                                                                                                                                                                                                                                                                                                                                                                                                                                                                                                                                                                                                                                                                                                                                                                                                                                                                                                                                                                                                                                                                                                                                                                                                                                                                                                                                                                                                                                                                                                                                                                                                                                                                                                                                                                                                                                                                                                                                                                                                                                                                                                                                                                                                                                                            | -8.01  | 27.78 | 5.54 | P | OUT |
| QLO1312 | 1,1,1,2,2,3,3,4,4,5,5,6,6,7,7,8,8,9,9,10,10,11,11,12,12-Pentaco | 93454-69-4   | CCCCCCCC(I)CC(F)(F)C(F)(F)C(F)(F)C(F)(F)C(F)(F)C(F)(F)C(F)(F)C(F)(F)F                                                                                                                                                                                                                                                                                                                                                                                                                                                                                                                                                                                                                                                                                                                                                                                                                                                                                                                                                                                                                                                                                                                                                                                                                                                                                                                                                                                                                                                                                                                                                                                                                                                                                                                                                                                                                                                                                                                                                                                                                                                                                                                                                                                                                                                                                                                                                                                                                                                                                                                                                                                                                                                                                                                                                                                                                                                                                                                                                                                                                                                                                                                                                                                                                                                                                                                                                                                                                                                                                                                                                                                                                                                                                                                                                                                                                                                                                                                                                                                                                                                                                                                                                                                                                                                                                                                                                                                                                                                                                                                                                                                                                                                                                                                                                                                                                               | -11.40 | 41.94 | 6.99 | P | OUT |
| QLO1313 | 1,1,1,2,2,3,3,4,4,5,5,6,6,7,7,8,8,9,9,10,10-Henicosafluoro-12-i | 129838-40-0  | CCCCCCCC(I)CC(F)(F)C(F)(F)C(F)(F)C(F)(F)C(F)(F)C(F)(F)C(F)(F)C(F)(F)F                                                                                                                                                                                                                                                                                                                                                                                                                                                                                                                                                                                                                                                                                                                                                                                                                                                                                                                                                                                                                                                                                                                                                                                                                                                                                                                                                                                                                                                                                                                                                                                                                                                                                                                                                                                                                                                                                                                                                                                                                                                                                                                                                                                                                                                                                                                                                                                                                                                                                                                                                                                                                                                                                                                                                                                                                                                                                                                                                                                                                                                                                                                                                                                                                                                                                                                                                                                                                                                                                                                                                                                                                                                                                                                                                                                                                                                                                                                                                                                                                                                                                                                                                                                                                                                                                                                                                                                                                                                                                                                                                                                                                                                                                                                                                                                                                               | -10.76 | 39.29 | 6.71 | P | OUT |
| QLO1314 | 1,1,1,2,2,3,3,4,4,5,5,6,6,7,7,8,8-Heptadecafluoro-10-iodohexa   | 96791-81-0   | CCCCCCCC(I)CC(F)(F)C(F)(F)C(F)(F)C(F)(F)C(F)(F)C(F)(F)F                                                                                                                                                                                                                                                                                                                                                                                                                                                                                                                                                                                                                                                                                                                                                                                                                                                                                                                                                                                                                                                                                                                                                                                                                                                                                                                                                                                                                                                                                                                                                                                                                                                                                                                                                                                                                                                                                                                                                                                                                                                                                                                                                                                                                                                                                                                                                                                                                                                                                                                                                                                                                                                                                                                                                                                                                                                                                                                                                                                                                                                                                                                                                                                                                                                                                                                                                                                                                                                                                                                                                                                                                                                                                                                                                                                                                                                                                                                                                                                                                                                                                                                                                                                                                                                                                                                                                                                                                                                                                                                                                                                                                                                                                                                                                                                                                                             | -10.00 | 36.00 | 6.39 | P | OUT |
| QLO1315 | 1,1,1,2,2,3,3,4,4,5,5,6,6,7,7-Pentadecafluoro-9-iodopentadec    | 918-32-1     | CCCCCCCC(I)CC(F)(F)C(F)(F)C(F)(F)C(F)(F)C(F)(F)C(F)(F)F                                                                                                                                                                                                                                                                                                                                                                                                                                                                                                                                                                                                                                                                                                                                                                                                                                                                                                                                                                                                                                                                                                                                                                                                                                                                                                                                                                                                                                                                                                                                                                                                                                                                                                                                                                                                                                                                                                                                                                                                                                                                                                                                                                                                                                                                                                                                                                                                                                                                                                                                                                                                                                                                                                                                                                                                                                                                                                                                                                                                                                                                                                                                                                                                                                                                                                                                                                                                                                                                                                                                                                                                                                                                                                                                                                                                                                                                                                                                                                                                                                                                                                                                                                                                                                                                                                                                                                                                                                                                                                                                                                                                                                                                                                                                                                                                                                             | -9.58  | 34.04 | 6.21 | P | OUT |
| QLO1316 | 1,1,1,2,2,3,3,4,4,5,5,6,6-Tridecafluoro-8-iodotetradecane       | 109574-84-7  | CCCCCCCC(I)CC(F)(F)C(F)(F)C(F)(F)C(F)(F)C(F)(F)F                                                                                                                                                                                                                                                                                                                                                                                                                                                                                                                                                                                                                                                                                                                                                                                                                                                                                                                                                                                                                                                                                                                                                                                                                                                                                                                                                                                                                                                                                                                                                                                                                                                                                                                                                                                                                                                                                                                                                                                                                                                                                                                                                                                                                                                                                                                                                                                                                                                                                                                                                                                                                                                                                                                                                                                                                                                                                                                                                                                                                                                                                                                                                                                                                                                                                                                                                                                                                                                                                                                                                                                                                                                                                                                                                                                                                                                                                                                                                                                                                                                                                                                                                                                                                                                                                                                                                                                                                                                                                                                                                                                                                                                                                                                                                                                                                                                    | -9.10  | 31.82 | 6.01 | P | OUT |
| QLO1317 | Dodecane, 1,1,1,2,2,3,3,4,4-nonafluoro-6-iodo-                  | 109603-73-8  | CCCCCCCC(I)CC(F)(F)C(F)(F)C(F)(F)C(F)(F)F                                                                                                                                                                                                                                                                                                                                                                                                                                                                                                                                                                                                                                                                                                                                                                                                                                                                                                                                                                                                                                                                                                                                                                                                                                                                                                                                                                                                                                                                                                                                                                                                                                                                                                                                                                                                                                                                                                                                                                                                                                                                                                                                                                                                                                                                                                                                                                                                                                                                                                                                                                                                                                                                                                                                                                                                                                                                                                                                                                                                                                                                                                                                                                                                                                                                                                                                                                                                                                                                                                                                                                                                                                                                                                                                                                                                                                                                                                                                                                                                                                                                                                                                                                                                                                                                                                                                                                                                                                                                                                                                                                                                                                                                                                                                                                                                                                                           | -7.98  | 26.32 | 5.54 | P | OUT |
| QLO1318 | 1,1,1,2,2,3,3-Heptafluoro-5-iodoundecane                        | 23885-16-7   | CCCCCCC(I)CC(F)(F)C(F)(F)C(F)(F)F                                                                                                                                                                                                                                                                                                                                                                                                                                                                                                                                                                                                                                                                                                                                                                                                                                                                                                                                                                                                                                                                                                                                                                                                                                                                                                                                                                                                                                                                                                                                                                                                                                                                                                                                                                                                                                                                                                                                                                                                                                                                                                                                                                                                                                                                                                                                                                                                                                                                                                                                                                                                                                                                                                                                                                                                                                                                                                                                                                                                                                                                                                                                                                                                                                                                                                                                                                                                                                                                                                                                                                                                                                                                                                                                                                                                                                                                                                                                                                                                                                                                                                                                                                                                                                                                                                                                                                                                                                                                                                                                                                                                                                                                                                                                                                                                                                                                   | -7.30  | 22.86 | 5.25 | P | OUT |
| QLO1319 | (7E)-9,9,10,10,11,11,12,12,13,13,14,14,15,15,16,16,16-Hepta     | 84201-60-5   | CCCCCCC=CC(F)(F)C(F)(F)C(F)(F)C(F)(F)C(F)(F)C(F)(F)C(F)(F)F                                                                                                                                                                                                                                                                                                                                                                                                                                                                                                                                                                                                                                                                                                                                                                                                                                                                                                                                                                                                                                                                                                                                                                                                                                                                                                                                                                                                                                                                                                                                                                                                                                                                                                                                                                                                                                                                                                                                                                                                                                                                                                                                                                                                                                                                                                                                                                                                                                                                                                                                                                                                                                                                                                                                                                                                                                                                                                                                                                                                                                                                                                                                                                                                                                                                                                                                                                                                                                                                                                                                                                                                                                                                                                                                                                                                                                                                                                                                                                                                                                                                                                                                                                                                                                                                                                                                                                                                                                                                                                                                                                                                                                                                                                                                                                                                                                         | -9.87  | 35.42 | 6.33 | P | OUT |
| QLO1320 | 1,1,1,2,2,3,3,4,4,5,5,6,6-Tridecafluorotetradec-7-ene           | 120464-26-8  | CCCCCCC=CC(F)(F)C(F)(F)C(F)(F)C(F)(F)C(F)(F)C(F)(F)F                                                                                                                                                                                                                                                                                                                                                                                                                                                                                                                                                                                                                                                                                                                                                                                                                                                                                                                                                                                                                                                                                                                                                                                                                                                                                                                                                                                                                                                                                                                                                                                                                                                                                                                                                                                                                                                                                                                                                                                                                                                                                                                                                                                                                                                                                                                                                                                                                                                                                                                                                                                                                                                                                                                                                                                                                                                                                                                                                                                                                                                                                                                                                                                                                                                                                                                                                                                                                                                                                                                                                                                                                                                                                                                                                                                                                                                                                                                                                                                                                                                                                                                                                                                                                                                                                                                                                                                                                                                                                                                                                                                                                                                                                                                                                                                                                                                | -8.93  | 30.95 | 5.94 | P | OUT |
| QLO1321 | (5E)-1,1,1,2,2,3,3,4,4-Nonafluorododec-5-ene                    | 113999-54-5  | CCCCCCC=CC(F)(F)C(F)(F)C(F)(F)C(F)(F)F                                                                                                                                                                                                                                                                                                                                                                                                                                                                                                                                                                                                                                                                                                                                                                                                                                                                                                                                                                                                                                                                                                                                                                                                                                                                                                                                                                                                                                                                                                                                                                                                                                                                                                                                                                                                                                                                                                                                                                                                                                                                                                                                                                                                                                                                                                                                                                                                                                                                                                                                                                                                                                                                                                                                                                                                                                                                                                                                                                                                                                                                                                                                                                                                                                                                                                                                                                                                                                                                                                                                                                                                                                                                                                                                                                                                                                                                                                                                                                                                                                                                                                                                                                                                                                                                                                                                                                                                                                                                                                                                                                                                                                                                                                                                                                                                                                                              | -7.76  | 25.00 | 5.45 | P | OUT |
| QLO1322 | 1,1,1,2,2,3,3,4,4,5,5,6,6,7,7,8,8,9,9,10,10-Henicosafluorohepti | 200817-54-5  | CCCCCCCCC(F)(F)C(F)(F)C(F)(F)C(F)(F)C(F)(F)C(F)(F)C(F)(F)C(F)(F)F                                                                                                                                                                                                                                                                                                                                                                                                                                                                                                                                                                                                                                                                                                                                                                                                                                                                                                                                                                                                                                                                                                                                                                                                                                                                                                                                                                                                                                                                                                                                                                                                                                                                                                                                                                                                                                                                                                                                                                                                                                                                                                                                                                                                                                                                                                                                                                                                                                                                                                                                                                                                                                                                                                                                                                                                                                                                                                                                                                                                                                                                                                                                                                                                                                                                                                                                                                                                                                                                                                                                                                                                                                                                                                                                                                                                                                                                                                                                                                                                                                                                                                                                                                                                                                                                                                                                                                                                                                                                                                                                                                                                                                                                                                                                                                                                                                   | -10.55 | 39.62 | 6.61 | P | OUT |
| QLO1323 | 1,1,1,2,2,3,3,4,4,5,5,6,6,7,7,8,8-Heptadecafluoropentadecane    | 182130-15-0  | CCCCCCCCC(F)(F)C(F)(F)C(F)(F)C(F)(F)C(F)(F)C(F)(F)C(F)(F)F                                                                                                                                                                                                                                                                                                                                                                                                                                                                                                                                                                                                                                                                                                                                                                                                                                                                                                                                                                                                                                                                                                                                                                                                                                                                                                                                                                                                                                                                                                                                                                                                                                                                                                                                                                                                                                                                                                                                                                                                                                                                                                                                                                                                                                                                                                                                                                                                                                                                                                                                                                                                                                                                                                                                                                                                                                                                                                                                                                                                                                                                                                                                                                                                                                                                                                                                                                                                                                                                                                                                                                                                                                                                                                                                                                                                                                                                                                                                                                                                                                                                                                                                                                                                                                                                                                                                                                                                                                                                                                                                                                                                                                                                                                                                                                                                                                          | -9.75  | 36.17 | 6.27 | P | OUT |
| QLO1324 | 1,1,1,2,2,3,3,4,4,5,5,6,6,7,7-Pentadecafluorotetradecane        | 38787-57-4   | CCCCCCCCC(F)(F)C(F)(F)C(F)(F)C(F)(F)C(F)(F)C(F)(F)C(F)(F)F                                                                                                                                                                                                                                                                                                                                                                                                                                                                                                                                                                                                                                                                                                                                                                                                                                                                                                                                                                                                                                                                                                                                                                                                                                                                                                                                                                                                                                                                                                                                                                                                                                                                                                                                                                                                                                                                                                                                                                                                                                                                                                                                                                                                                                                                                                                                                                                                                                                                                                                                                                                                                                                                                                                                                                                                                                                                                                                                                                                                                                                                                                                                                                                                                                                                                                                                                                                                                                                                                                                                                                                                                                                                                                                                                                                                                                                                                                                                                                                                                                                                                                                                                                                                                                                                                                                                                                                                                                                                                                                                                                                                                                                                                                                                                                                                                                          | -9.30  | 34.09 | 6.08 | P | OUT |
| QLO1325 | 1,1,1,2,2,3,3,4,4,5,5,6,6-Tridecafluorotridecane                | 1835249-87-0 | CCCCCCCCC(F)(F)C(F)(F)C(F)(F)C(F)(F)C(F)(F)F                                                                                                                                                                                                                                                                                                                                                                                                                                                                                                                                                                                                                                                                                                                                                                                                                                                                                                                                                                                                                                                                                                                                                                                                                                                                                                                                                                                                                                                                                                                                                                                                                                                                                                                                                                                                                                                                                                                                                                                                                                                                                                                                                                                                                                                                                                                                                                                                                                                                                                                                                                                                                                                                                                                                                                                                                                                                                                                                                                                                                                                                                                                                                                                                                                                                                                                                                                                                                                                                                                                                                                                                                                                                                                                                                                                                                                                                                                                                                                                                                                                                                                                                                                                                                                                                                                                                                                                                                                                                                                                                                                                                                                                                                                                                                                                                                                                        | -8.79  | 31.71 | 5.86 | P | OUT |
| QLO1326 | 1,1,1,2,2,3,3,4,4-Nonafluoroundecane                            | 1190430-22-8 | CCCCCCCCC(F)(F)C(F)(F)C(F)(F)C(F)(F)F                                                                                                                                                                                                                                                                                                                                                                                                                                                                                                                                                                                                                                                                                                                                                                                                                                                                                                                                                                                                                                                                                                                                                                                                                                                                                                                                                                                                                                                                                                                                                                                                                                                                                                                                                                                                                                                                                                                                                                                                                                                                                                                                                                                                                                                                                                                                                                                                                                                                                                                                                                                                                                                                                                                                                                                                                                                                                                                                                                                                                                                                                                                                                                                                                                                                                                                                                                                                                                                                                                                                                                                                                                                                                                                                                                                                                                                                                                                                                                                                                                                                                                                                                                                                                                                                                                                                                                                                                                                                                                                                                                                                                                                                                                                                                                                                                                                               | -7.57  | 25.71 | 5.35 | P | OUT |
| QLO1327 | 1,1,1,2,2,3,3,4,4,5,5,6,6,7,7,8,8,9,9,10,10-Henicosafluoro-12-i | 129838-41-1  | CCCCCCCCC(I)CC(F)(F)C(F)(F)C(F)(F)C(F)(F)C(F)(F)C(F)(F)C(F)(F)F                                                                                                                                                                                                                                                                                                                                                                                                                                                                                                                                                                                                                                                                                                                                                                                                                                                                                                                                                                                                                                                                                                                                                                                                                                                                                                                                                                                                                                                                                                                                                                                                                                                                                                                                                                                                                                                                                                                                                                                                                                                                                                                                                                                                                                                                                                                                                                                                                                                                                                                                                                                                                                                                                                                                                                                                                                                                                                                                                                                                                                                                                                                                                                                                                                                                                                                                                                                                                                                                                                                                                                                                                                                                                                                                                                                                                                                                                                                                                                                                                                                                                                                                                                                                                                                                                                                                                                                                                                                                                                                                                                                                                                                                                                                                                                                                                                     | -10.82 | 37.29 | 6.76 | P | OUT |
| QLO1328 | 1,1,1,2,2,3,3,4,4-Nonafluorododecan-5-ol                        | 311294-52-5  | CCCCCCCCC(O)C(F)(F)C(F)(F)C(F)(F)C(F)(F)F                                                                                                                                                                                                                                                                                                                                                                                                                                                                                                                                                                                                                                                                                                                                                                                                                                                                                                                                                                                                                                                                                                                                                                                                                                                                                                                                                                                                                                                                                                                                                                                                                                                                                                                                                                                                                                                                                                                                                                                                                                                                                                                                                                                                                                                                                                                                                                                                                                                                                                                                                                                                                                                                                                                                                                                                                                                                                                                                                                                                                                                                                                                                                                                                                                                                                                                                                                                                                                                                                                                                                                                                                                                                                                                                                                                                                                                                                                                                                                                                                                                                                                                                                                                                                                                                                                                                                                                                                                                                                                                                                                                                                                                                                                                                                                                                                                                           | -7.91  | 23.08 | 5.54 | P | OUT |
| QLO1329 | N,N,N-Trimethylcyan-1-aminium pentadecafluorooctanoate          | 927835-01-6  | CCCCCCCCC[N+](C)(C)C.[O-][C-]=O(C(F)(F)C(F)(F)C(F)(F)C(F)(F)C(F)(F)C(F)(F)F                                                                                                                                                                                                                                                                                                                                                                                                                                                                                                                                                                                                                                                                                                                                                                                                                                                                                                                                                                                                                                                                                                                                                                                                                                                                                                                                                                                                                                                                                                                                                                                                                                                                                                                                                                                                                                                                                                                                                                                                                                                                                                                                                                                                                                                                                                                                                                                                                                                                                                                                                                                                                                                                                                                                                                                                                                                                                                                                                                                                                                                                                                                                                                                                                                                                                                                                                                                                                                                                                                                                                                                                                                                                                                                                                                                                                                                                                                                                                                                                                                                                                                                                                                                                                                                                                                                                                                                                                                                                                                                                                                                                                                                                                                                                                                                                                         | -8.92  | 23.81 | 6.00 | P | OUT |
| QLO1330 | 1,1,1,2,2,3,3,4,4,5,5,6,6-Tridecafluoropentadec-7-ene           | 1980786-99-9 | CCCCCCCC=CC(F)(F)C(F)(F)C(F)(F)C(F)(F)C(F)(F)F                                                                                                                                                                                                                                                                                                                                                                                                                                                                                                                                                                                                                                                                                                                                                                                                                                                                                                                                                                                                                                                                                                                                                                                                                                                                                                                                                                                                                                                                                                                                                                                                                                                                                                                                                                                                                                                                                                                                                                                                                                                                                                                                                                                                                                                                                                                                                                                                                                                                                                                                                                                                                                                                                                                                                                                                                                                                                                                                                                                                                                                                                                                                                                                                                                                                                                                                                                                                                                                                                                                                                                                                                                                                                                                                                                                                                                                                                                                                                                                                                                                                                                                                                                                                                                                                                                                                                                                                                                                                                                                                                                                                                                                                                                                                                                                                                                                      | -9.04  | 28.89 | 6.01 | P | OUT |
| QLO1331 | 1,1,1,2,2,3,3,4,4,5,5,6,6,7,7,8,8,9,9,10,10,11,11,12,12-Pentaco | 90499-71-3   | CCCCCCCCC(F)(F)C(F)(F)C(F)(F)C(F)(F)C(F)(F)C(F)(F)C(F)(F)C(F)(F)F                                                                                                                                                                                                                                                                                                                                                                                                                                                                                                                                                                                                                                                                                                                                                                                                                                                                                                                                                                                                                                                                                                                                                                                                                                                                                                                                                                                                                                                                                                                                                                                                                                                                                                                                                                                                                                                                                                                                                                                                                                                                                                                                                                                                                                                                                                                                                                                                                                                                                                                                                                                                                                                                                                                                                                                                                                                                                                                                                                                                                                                                                                                                                                                                                                                                                                                                                                                                                                                                                                                                                                                                                                                                                                                                                                                                                                                                                                                                                                                                                                                                                                                                                                                                                                                                                                                                                                                                                                                                                                                                                                                                                                                                                                                                                                                                                                   | -11.28 | 40.32 | 6.94 | P | OUT |
| QLO1332 | 1,1,1,2,2,3,3,4,4,5,5,6,6,7,7,8,8,9,9,10,10-Henicosafluoroocta  | 93454-30-7   | CCCCCCCCC(F)(F)C(F)(F)C(F)(F)C(F)(F)C(F)(F)C(F)(F)C(F)(F)C(F)(F)F                                                                                                                                                                                                                                                                                                                                                                                                                                                                                                                                                                                                                                                                                                                                                                                                                                                                                                                                                                                                                                                                                                                                                                                                                                                                                                                                                                                                                                                                                                                                                                                                                                                                                                                                                                                                                                                                                                                                                                                                                                                                                                                                                                                                                                                                                                                                                                                                                                                                                                                                                                                                                                                                                                                                                                                                                                                                                                                                                                                                                                                                                                                                                                                                                                                                                                                                                                                                                                                                                                                                                                                                                                                                                                                                                                                                                                                                                                                                                                                                                                                                                                                                                                                                                                                                                                                                                                                                                                                                                                                                                                                                                                                                                                                                                                                                                                   | -10.61 | 37.50 | 6.66 | P | OUT |
| QLO1333 | 1,1,1,2,2,3,3,4,4-Nonafluorododecane                            | 69125-79-7   | CCCCCCCCC(F)(F)C(F)(F)C(F)(F)C(F)(F)F                                                                                                                                                                                                                                                                                                                                                                                                                                                                                                                                                                                                                                                                                                                                                                                                                                                                                                                                                                                                                                                                                                                                                                                                                                                                                                                                                                                                                                                                                                                                                                                                                                                                                                                                                                                                                                                                                                                                                                                                                                                                                                                                                                                                                                                                                                                                                                                                                                                                                                                                                                                                                                                                                                                                                                                                                                                                                                                                                                                                                                                                                                                                                                                                                                                                                                                                                                                                                                                                                                                                                                                                                                                                                                                                                                                                                                                                                                                                                                                                                                                                                                                                                                                                                                                                                                                                                                                                                                                                                                                                                                                                                                                                                                                                                                                                                                                               | -7.73  | 23.68 | 5.45 | P | OUT |
| QLO1334 | 1,1,1,2,2,3,3-Heptafluoroundecane                               | 1190430-20-6 | CCCCCCCCC(F)(F)C(F)(F)C(F)(F)F                                                                                                                                                                                                                                                                                                                                                                                                                                                                                                                                                                                                                                                                                                                                                                                                                                                                                                                                                                                                                                                                                                                                                                                                                                                                                                                                                                                                                                                                                                                                                                                                                                                                                                                                                                                                                                                                                                                                                                                                                                                                                                                                                                                                                                                                                                                                                                                                                                                                                                                                                                                                                                                                                                                                                                                                                                                                                                                                                                                                                                                                                                                                                                                                                                                                                                                                                                                                                                                                                                                                                                                                                                                                                                                                                                                                                                                                                                                                                                                                                                                                                                                                                                                                                                                                                                                                                                                                                                                                                                                                                                                                                                                                                                                                                                                                                                                                      | -7.02  | 20.00 | 5.15 | P | OUT |
| QLO1335 | 1,1,1,2,2,3,3,4,4,5,5,6,6,7,7,8,8,9,9,10,10-Henicosafluoro-12-i | 121633-31-6  | CCCCCCCCC(I)CC(F)(F)C(F)(F)C(F)(F)C(F)(F)C(F)(F)C(F)(F)C(F)(F)F                                                                                                                                                                                                                                                                                                                                                                                                                                                                                                                                                                                                                                                                                                                                                                                                                                                                                                                                                                                                                                                                                                                                                                                                                                                                                                                                                                                                                                                                                                                                                                                                                                                                                                                                                                                                                                                                                                                                                                                                                                                                                                                                                                                                                                                                                                                                                                                                                                                                                                                                                                                                                                                                                                                                                                                                                                                                                                                                                                                                                                                                                                                                                                                                                                                                                                                                                                                                                                                                                                                                                                                                                                                                                                                                                                                                                                                                                                                                                                                                                                                                                                                                                                                                                                                                                                                                                                                                                                                                                                                                                                                                                                                                                                                                                                                                                                     | -10.88 | 35.48 | 6.81 | P | OUT |
| QLO1336 | 1,1,1,2,2,3,3,4,4,5,5,6,6,7,7,8,8-Heptadecafluoro-10-iodoocta   | 176979-17-2  | CCCCCCCCC(I)CC(F)(F)C(F)(F)C(F)(F)C(F)(F)C(F)(F)C(F)(F)F                                                                                                                                                                                                                                                                                                                                                                                                                                                                                                                                                                                                                                                                                                                                                                                                                                                                                                                                                                                                                                                                                                                                                                                                                                                                                                                                                                                                                                                                                                                                                                                                                                                                                                                                                                                                                                                                                                                                                                                                                                                                                                                                                                                                                                                                                                                                                                                                                                                                                                                                                                                                                                                                                                                                                                                                                                                                                                                                                                                                                                                                                                                                                                                                                                                                                                                                                                                                                                                                                                                                                                                                                                                                                                                                                                                                                                                                                                                                                                                                                                                                                                                                                                                                                                                                                                                                                                                                                                                                                                                                                                                                                                                                                                                                                                                                                                            | -10.16 | 32.14 | 6.50 | P | OUT |
| QLO1337 | 1,1,1,2,2,3,3,4,4,5,5,6,6-Tridecafluoro-8-iodohexadecane        | 207122-00-7  | CCCCCCCCC(I)CC(F)(F)C(F)(F)C(F)(F)C(F)(F)C(F)(F)F                                                                                                                                                                                                                                                                                                                                                                                                                                                                                                                                                                                                                                                                                                                                                                                                                                                                                                                                                                                                                                                                                                                                                                                                                                                                                                                                                                                                                                                                                                                                                                                                                                                                                                                                                                                                                                                                                                                                                                                                                                                                                                                                                                                                                                                                                                                                                                                                                                                                                                                                                                                                                                                                                                                                                                                                                                                                                                                                                                                                                                                                                                                                                                                                                                                                                                                                                                                                                                                                                                                                                                                                                                                                                                                                                                                                                                                                                                                                                                                                                                                                                                                                                                                                                                                                                                                                                                                                                                                                                                                                                                                                                                                                                                                                                                                                                                                   | -9.31  | 28.00 | 6.14 | P | OUT |
| QLO1338 | (Z)-Octadec-9-enyl 5-(((2-(((perfluorooctyl)sulphonyl)methyla   | 94313-84-5   | CCCCCCCCC=C/C/C(C)(F)(F)C(F)(F)C(F)(F)C(F)(F)C(F)(F)C(F)(F)C(F)(F)C(F)(F)C(F)(F)C(F)(F)C(F)(F)C(F)(F)C(F)(F)C(F)(F)C(F)(F)C(F)(F)C(F)(F)C(F)(F)C(F)(F)C(F)(F)C(F)(F)C(F)(F)C(F)(F)C(F)(F)C(F)(F)C(F)(F)C(F)(F)C(F)(F)C(F)(F)C(F)(F)C(F)(F)C(F)(F)C(F)(F)C(F)(F)C(F)(F)C(F)(F)C(F)(F)C(F)(F)C(F)(F)C(F)(F)C(F)(F)C(F)(F)C(F)(F)C(F)(F)C(F)(F)C(F)(F)C(F)(F)C(F)(F)C(F)(F)C(F)(F)C(F)(F)C(F)(F)C(F)(F)C(F)(F)C(F)(F)C(F)(F)C(F)(F)C(F)(F)C(F)(F)C(F)(F)C(F)(F)C(F)(F)C(F)(F)C(F)(F)C(F)(F)C(F)(F)C(F)(F)C(F)(F)C(F)(F)C(F)(F)C(F)(F)C(F)(F)C(F)(F)C(F)(F)C(F)(F)C(F)(F)C(F)(F)C(F)(F)C(F)(F)C(F)(F)C(F)(F)C(F)(F)C(F)(F)C(F)(F)C(F)(F)C(F)(F)C(F)(F)C(F)(F)C(F)(F)C(F)(F)C(F)(F)C(F)(F)C(F)(F)C(F)(F)C(F)(F)C(F)(F)C(F)(F)C(F)(F)C(F)(F)C(F)(F)C(F)(F)C(F)(F)C(F)(F)C(F)(F)C(F)(F)C(F)(F)C(F)(F)C(F)(F)C(F)(F)C(F)(F)C(F)(F)C(F)(F)C(F)(F)C(F)(F)C(F)(F)C(F)(F)C(F)(F)C(F)(F)C(F)(F)C(F)(F)C(F)(F)C(F)(F)C(F)(F)C(F)(F)C(F)(F)C(F)(F)C(F)(F)C(F)(F)C(F)(F)C(F)(F)C(F)(F)C(F)(F)C(F)(F)C(F)(F)C(F)(F)C(F)(F)C(F)(F)C(F)(F)C(F)(F)C(F)(F)C(F)(F)C(F)(F)C(F)(F)C(F)(F)C(F)(F)C(F)(F)C(F)(F)C(F)(F)C(F)(F)C(F)(F)C(F)(F)C(F)(F)C(F)(F)C(F)(F)C(F)(F)C(F)(F)C(F)(F)C(F)(F)C(F)(F)C(F)(F)C(F)(F)C(F)(F)C(F)(F)C(F)(F)C(F)(F)C(F)(F)C(F)(F)C(F)(F)C(F)(F)C(F)(F)C(F)(F)C(F)(F)C(F)(F)C(F)(F)C(F)(F)C(F)(F)C(F)(F)C(F)(F)C(F)(F)C(F)(F)C(F)(F)C(F)(F)C(F)(F)C(F)(F)C(F)(F)C(F)(F)C(F)(F)C(F)(F)C(F)(F)C(F)(F)C(F)(F)C(F)(F)C(F)(F)C(F)(F)C(F)(F)C(F)(F)C(F)(F)C(F)(F)C(F)(F)C(F)(F)C(F)(F)C(F)(F)C(F)(F)C(F)(F)C(F)(F)C(F)(F)C(F)(F)C(F)(F)C(F)(F)C(F)(F)C(F)(F)C(F)(F)C(F)(F)C(F)(F)C(F)(F)C(F)(F)C(F)(F)C(F)(F)C(F)(F)C(F)(F)C(F)(F)C(F)(F)C(F)(F)C(F)(F)C(F)(F)C(F)(F)C(F)(F)C(F)(F)C(F)(F)C(F)(F)C(F)(F)C(F)(F)C(F)(F)C(F)(F)C(F)(F)C(F)(F)C(F)(F)C(F)(F)C(F)(F)C(F)(F)C(F)(F)C(F)(F)C(F)(F)C(F)(F)C(F)(F)C(F)(F)C(F)(F)C(F)(F)C(F)(F)C(F)(F)C(F)(F)C(F)(F)C(F)(F)C(F)(F)C(F)(F)C(F)(F)C(F)(F)C(F)(F)C(F)(F)C(F)(F)C(F)(F)C(F)(F)C(F)(F)C(F)(F)C(F)(F)C(F)(F)C(F)(F)C(F)(F)C(F)(F)C(F)(F)C(F)(F)C(F)(F)C(F)(F)C(F)(F)C(F)(F)C(F)(F)C(F)(F)C(F)(F)C(F)(F)C(F)(F)C(F)(F)C(F)(F)C(F)(F)C(F)(F)C(F)(F)C(F)(F)C(F)(F)C(F)(F)C(F)(F)C(F)(F)C(F)(F)C(F)(F)C(F)(F)C(F)(F)C(F)(F)C(F)(F)C(F)(F)C(F)(F)C(F)(F)C(F)(F)C(F)(F)C(F)(F)C(F)(F)C(F)(F)C(F)(F)C(F)(F)C(F)(F)C(F)(F)C(F)(F)C(F)(F)C(F)(F)C(F)(F)C(F)(F)C(F)(F)C(F)(F)C(F)(F)C(F)(F)C(F)(F)C(F)(F)C(F)(F)C(F)(F)C(F)(F)C(F)(F)C(F)(F)C(F)(F)C(F)(F)C(F)(F)C(F)(F)C(F)(F)C(F)(F)C(F)(F)C(F)(F)C(F)(F)C(F)(F)C(F)(F)C(F)(F)C(F)(F)C(F)(F)C(F)(F)C(F)(F)C(F)(F)C(F)(F)C(F)(F)C(F)(F)C(F)(F)C(F)(F)C(F)(F)C(F)(F)C(F)(F)C(F)(F)C(F)(F)C(F)(F)C(F)(F)C(F)(F)C(F)(F)C(F)(F)C(F)(F)C(F)(F)C(F)(F)C(F)(F)C(F)(F)C(F)(F)C(F)(F)C(F)(F)C(F)(F)C(F)(F)C(F)(F)C(F)(F)C(F)(F)C(F)(F)C(F)(F)C(F)(F)C(F)(F)C(F)(F)C(F)(F)C(F)(F)C(F)(F)C(F)(F)C(F)(F)C(F)(F)C(F)(F)C(F)(F)C(F)(F)C(F)(F)C(F)(F)C(F)(F)C(F)(F)C(F)(F)C(F)(F)C(F)(F)C(F)(F)C(F)(F)C(F)(F)C(F)(F)C(F)(F)C(F)(F)C(F)(F)C(F)(F)C(F)(F)C(F)(F)C(F)(F)C(F)(F)C(F)(F)C(F)(F)C(F)(F)C(F)(F)C(F)(F)C(F)(F)C(F)(F)C(F)(F)C(F)(F)C(F)(F)C(F)(F)C(F)(F)C(F)(F)C(F)(F)C(F)(F)C(F)(F)C(F)(F)C(F)(F)C(F)(F)C(F)(F)C(F)(F)C(F)(F)C(F)(F)C(F)(F)C(F)(F)C(F)(F)C(F)(F)C(F)(F)C(F)(F)C(F)(F)C(F)(F)C(F)(F)C(F)(F)C(F)(F)C(F)(F)C(F)(F)C(F)(F)C(F)(F)C(F)(F)C(F)(F)C(F)(F)C(F)(F)C(F)(F)C(F)(F)C(F)(F)C(F)(F)C(F)(F)C(F)(F)C(F)(F)C(F)(F)C(F)(F)C(F)(F)C(F)(F)C(F)(F)C(F)(F)C(F)(F)C(F)(F)C(F)(F)C(F)(F)C(F)(F)C(F)(F)C(F)(F)C(F)(F)C(F)(F)C(F)(F)C(F)(F)C(F)(F)C(F)(F)C(F)(F)C(F)(F)C(F)(F)C(F)(F)C(F)(F)C(F)(F)C(F)(F)C(F)(F)C(F)(F)C(F)(F)C(F)(F)C(F)(F)C(F)(F)C(F)(F)C(F)(F)C(F)(F)C(F)(F)C(F)(F)C(F)(F)C(F)(F)C(F)(F)C(F)(F)C(F)(F)C(F)(F)C(F)(F)C(F)(F)C(F)(F)C(F)(F)C(F)(F)C(F)(F)C(F)(F)C(F)(F)C(F)(F)C(F)(F)C(F)(F)C(F)(F)C(F)(F)C(F)(F)C(F)(F)C(F)(F)C(F)(F)C(F)(F)C(F)(F)C(F)(F)C(F)(F)C(F)(F)C(F)(F)C(F)(F)C(F)(F)C(F)(F)C(F)(F)C(F)(F)C(F)(F)C(F)(F)C(F)(F)C(F)(F)C(F)(F)C(F)(F)C(F)(F)C(F)(F)C(F)(F)C(F)(F)C(F)(F)C(F)(F)C(F)(F)C(F)(F)C(F)(F)C(F)(F)C(F)(F)C(F)(F)C(F)(F)C(F)(F)C(F)(F)C(F)(F)C(F)(F)C(F)(F)C(F)(F)C(F)(F)C(F)(F)C(F)(F)C(F)(F)C(F)(F)C(F)(F)C(F)(F)C(F)(F)C(F)(F)C(F)(F)C(F)(F)C(F)(F)C(F)(F)C(F)(F)C(F)(F)C(F)(F)C(F)(F)C(F)(F)C(F)(F)C(F)(F)C(F)(F)C(F)(F)C(F)(F)C(F)(F)C(F)(F)C(F)(F)C(F)(F)C(F)(F)C(F)(F)C(F)(F)C(F)(F)C(F)(F)C(F)(F)C(F)(F)C(F)(F)C(F)(F)C(F)(F)C(F)(F)C(F)(F)C(F)(F)C(F)(F)C(F)(F)C(F)(F)C(F)(F)C(F)(F)C(F)(F)C(F)(F)C(F)(F)C(F)(F)C(F)(F)C(F)(F)C(F)(F)C(F)(F)C(F)(F)C(F)(F)C(F)(F)C(F)(F)C(F)(F)C(F)(F)C(F)(F)C(F)(F)C(F)(F)C(F)(F)C(F)(F)C(F)(F)C(F)(F)C(F)(F)C(F)(F)C(F)(F)C(F)(F)C(F)(F)C(F)(F)C(F)(F)C(F)(F)C(F)(F)C(F)(F)C(F)(F)C(F)(F)C(F)(F)C(F)(F)C(F)(F)C(F)(F)C(F)(F)C(F)(F)C(F)(F)C(F)(F)C(F)(F)C(F)(F)C(F)(F)C(F)(F)C(F)(F)C(F)(F)C(F)(F)C(F)(F)C(F)(F)C(F)(F)C(F)(F)C(F)(F)C(F)(F)C(F)(F)C(F)(F)C(F)(F)C(F)(F)C(F)(F)C(F)(F)C(F)(F)C(F)(F)C(F)(F)C(F)(F)C(F)(F)C(F)(F)C(F)(F)C(F)(F)C(F)(F)C(F)(F)C(F)(F)C(F)(F)C(F)(F)C(F)(F)C(F)(F)C(F)(F)C(F)(F)C(F)(F) |        |       |      |   |     |



[illegible]



|         |                                                                |              |                                                                                       |        |  |       |      |   |       |
|---------|----------------------------------------------------------------|--------------|---------------------------------------------------------------------------------------|--------|--|-------|------|---|-------|
| QL01424 | 1,1,1,2,2,3,3,4,4,5,5,6,7,8,9,9,10,10,11,11,12,12-Pentaco      | 677324-32-2  | C C C C C C C C C C C C C F(F)C(F)F(C)(F)C(F)F(C)(F)C(F)F(C)(F)C(F)F(C)(F)C(F)F(C)(F) | -11.79 |  | 28.09 | 7.30 | P | OUT   |
| QL01425 | 1,1,1,2,2,3,3,4,4,5,5,6,6,7,7,8,8,9,10,10-Henicosafluorohept-  | 250738-44-4  | C C C C C C C C C C C C C C C C F(F)C(F)F(C)(F)C(F)F(C)(F)C(F)F(C)(F)C(F)F(C)(F)F     | -11.23 |  | 25.30 | 7.07 | P | OUT   |
| QL01426 | 1,1,1,2,2,3,3,4,4,5,5,6,6,7,7,8,8-Heptaecafluoropentacosane    | 871311-25-0  | C C C C C C C C C C C C C C C C F(F)C(F)F(C)(F)F(C)(F)C(F)F(C)(F)C(F)F(C)(F)F         | -10.60 |  | 22.08 | 6.81 | P | OUT   |
| QL01427 | 1,1,1,2,2,3,3,4,4,5,5,6,6-Tridecafluorotricosane               | 863126-43-6  | C C C C C C C C C C C C C C C C F(F)C(F)F(C)(F)C(F)F(C)(F)F                           | -9.88  |  | 18.31 | 6.50 | P | OUT   |
| QL01428 | 1,1,1,2,2,3,3,4,4,5,5,6,6,7,7,8,8,9,10,10,11,11,12,12-Pentaco  | 934545-75-2  | C C C C C C C C C C C C C C C C F(F)C(F)F(C)(F)C(F)F(C)(F)C(F)F(C)(F)C(F)F(C)(F)C(F)F | -11.85 |  | 27.17 | 7.34 | P | OUT   |
| QL01429 | 1,1,1,2,2,3,3,4,4,5,5,6,6,7,7,8,8,9,10,10-Henicosafluorooctac  | 250738-45-5  | C C C C C C C C C C C C C C C C F(F)C(F)F(C)(F)C(F)F(C)(F)C(F)F(C)(F)C(F)F(C)(F)F     | -11.30 |  | 24.42 | 7.11 | P | OUT   |
| QL01430 | 1,1,1,2,2,3,3,4,4,5,5,6,6,7,7,8,8,9,9-Nonadecafluoroheptacosan | 117948-74-0  | C C C C C C C C C C C C C C C C F(F)C(F)F(C)(F)F(C)(F)C(F)F(C)(F)C(F)F(C)(F)F         | -11.00 |  | 22.89 | 6.99 | P | OUT   |
| QL01431 | 1,1,1,2,2,3,3,4,4,5,5,6,6,7,7,8,8-Heptaecafluorohexacosane     | 133310-73-3  | C C C C C C C C C C C C C C C C F(F)C(F)F(C)(F)C(F)F(C)(F)C(F)F(C)(F)F                | -10.69 |  | 21.25 | 6.85 | P | OUT   |
| QL01432 | 1,1,1,2,2,3,3,4,4,5,5,6,6-Tridecafluorotetracosane             | 154628-01-0  | C C C C C C C C C C C C C C C C F(F)C(F)F(C)(F)C(F)F(C)(F)F                           | -9.98  |  | 17.57 | 6.56 | P | OUT   |
| QL01433 | 1,1,1,2,2,3,3,4,4-Nonafluorodocosane                           | 133310-70-0  | C C C C C C C C C C C C C C C C F(F)C(F)F(C)(F)C(F)F                                  | -9.14  |  | 13.24 | 6.21 | P | OUT   |
| QL01434 | 1,1,1,2,2,3,3,4,4,5,5,6,6,7,7,8,8,9,10,10-Henicosafluoro-12-ic | 1257261-89-4 | C C C C C C C C C C C C C C C C F(F)C(F)F(C)(F)C(F)F(C)(F)C(F)F(C)(F)F                | -11.54 |  | 23.91 | 7.23 | P | OUT   |
| QL01435 | 1,1,1,2,2,3,3,4,4,5,5,6,6,7,7,8,8-Heptaecafluoro-10-iodoactai  | 1257261-95-2 | C C C C C C C C C C C C C C C C F(F)C(F)F(C)(F)C(F)F(C)(F)C(F)F(C)(F)F                | -10.96 |  | 20.93 | 6.99 | P | OUT   |
| QL01436 | 1,1,1,2,2,3,3,4,4,5,5,6,6,7,7,8,8,9,10,10,11,11,12,12-Pentaco  | 264229-79-0  | C C C C C C C C C C C C C C C C F(F)C(F)F(C)(F)C(F)F(C)(F)C(F)F(C)(F)F                | -11.91 |  | 26.32 | 7.38 | P | OUT   |
| QL01437 | 1,1,1,2,2,3,3,4,4,5,5,6,6,7,7,8,8,9,10,10-Henicosafluoronona   | 250738-46-6  | C C C C C C C C C C C C C C C C F(F)C(F)F(C)(F)C(F)F(C)(F)C(F)F(C)(F)C(F)F(C)(F)F     | -11.37 |  | 23.60 | 7.15 | P | OUT   |
| QL01438 | 1,1,1,2,2,3,3,4,4,5,5,6,6,7,7,8,8-Heptaecafluoroheptacosane    | 871311-26-1  | C C C C C C C C C C C C C C C C F(F)C(F)F(C)(F)C(F)F(C)(F)C(F)F(C)(F)F                | -10.77 |  | 20.48 | 6.90 | P | OUT   |
| QL01439 | 1,1,1,2,2,3,3,4,4,5,5,6,6-Tridecafluoropentacosane             | 863126-44-7  | C C C C C C C C C C C C C C C C F(F)C(F)F(C)(F)C(F)F(C)(F)F                           | -10.07 |  | 16.88 | 6.61 | P | OUT   |
| QL01440 | 1,1,1,2,2,3,3,4,4,5,5,6,6,7,7,8,8,9,10,10,11,11,12,12-Pentaco  | 89109-72-8   | C C C C C C C C C C C C C C C C F(F)C(F)F(C)(F)C(F)F(C)(F)C(F)F(C)(F)F                | -11.97 |  | 25.51 | 7.41 | P | OUT   |
| QL01441 | 1,1,1,2,2,3,3,4,4,5,5,6,6,7,7,8,8,9,10,10-Henicosafluorotriacc | 766529-12-8  | C C C C C C C C C C C C C C C C F(F)C(F)F(C)(F)C(F)F(C)(F)C(F)F(C)(F)F                | -11.44 |  | 22.83 | 7.19 | P | OUT   |
| QL01442 | 1,1,1,2,2,3,3,4,4,5,5,6,6,7,7,8,8,9,9-Nonadecafluorononacosar  | 117948-75-1  | C C C C C C C C C C C C C C C C F(F)C(F)F(C)(F)C(F)F(C)(F)C(F)F(C)(F)F                | -11.15 |  | 21.35 | 7.07 | P | OUT   |
| QL01443 | 1,1,1,2,2,3,3,4,4,5,5,6,6,7,7,8,8-Heptaecafluoroottacosane     | 137338-39-7  | C C C C C C C C C C C C C C C C F(F)C(F)F(C)(F)C(F)F(C)(F)C(F)F                       | -10.85 |  | 19.77 | 6.94 | P | OUT   |
| QL01444 | 1,1,1,2,2,3,3,4,4,5,5,6,6-Tridecafluorohexacosane              | 825651-73-8  | C C C C C C C C C C C C C C C C F(F)C(F)F(C)(F)C(F)F(C)(F)F                           | -10.17 |  | 16.25 | 6.66 | P | OUT   |
| QL01445 | 1,1,1,2,2,3,3,4,4-Nonafluortetrasocane                         | 808578-67-0  | C C C C C C C C C C C C C C C C F(F)C(F)F(C)(F)F                                      | -9.38  |  | 12.16 | 6.33 | P | OUT   |
| QL01446 | 1,1,1,2,2,3,3,4,4,5,5,6,6,7,7,8,8-Heptaecafluorotriacontane    | 137338-40-0  | C C C C C C C C C C C C C C C C F(F)C(F)F(C)(F)C(F)F(C)(F)C(F)F                       | -11.00 |  | 18.48 | 7.03 | P | OUT   |
| QL01447 | 1,1,1,2,2,3,3,4,4,5,5,6,6,7,7,8,8-Heptaecafluordotrictantani   | 137338-41-1  | C C C C C C C C C C C C C C C C F(F)C(F)F(C)(F)C(F)F(C)(F)F                           | -11.16 |  | 17.35 | 7.11 | P | OUT</ |



[illegible]



[illegible]



|         |                                                                    |              |                                                                                                                                                                                                                                                                                                                                                                                                                                                                                                                                                                                                                                                                                                                                                                                                                                                                                                                                                                                                                                                                                                                                                                                                                                                                                                                                                                                                                                                                                                                                                                                                                                                                                                                                                                                                                                                                                                                                                                                                                                                                                                                                                                                                                                                                                                                                                                                                                                                                                                                                                                                                                                                                                                                                                                                                                                                                                                                                                                                                                                                                                                                                                                                                                                                                                                                                                                                                                                                                                                                                                                                                                                                                                                                                                                                                                                                                                                                                                                                                                                                                                                                                                                                                                                                                                                                                                                                                                                                                                                                                                                                                                                                                                                                                                                                                                                                                                                                                                                                                                                                                                                                                                                                                                                                                                                                                                                                                                                                                                        |        |  |       |      |   |  |     |
|---------|--------------------------------------------------------------------|--------------|----------------------------------------------------------------------------------------------------------------------------------------------------------------------------------------------------------------------------------------------------------------------------------------------------------------------------------------------------------------------------------------------------------------------------------------------------------------------------------------------------------------------------------------------------------------------------------------------------------------------------------------------------------------------------------------------------------------------------------------------------------------------------------------------------------------------------------------------------------------------------------------------------------------------------------------------------------------------------------------------------------------------------------------------------------------------------------------------------------------------------------------------------------------------------------------------------------------------------------------------------------------------------------------------------------------------------------------------------------------------------------------------------------------------------------------------------------------------------------------------------------------------------------------------------------------------------------------------------------------------------------------------------------------------------------------------------------------------------------------------------------------------------------------------------------------------------------------------------------------------------------------------------------------------------------------------------------------------------------------------------------------------------------------------------------------------------------------------------------------------------------------------------------------------------------------------------------------------------------------------------------------------------------------------------------------------------------------------------------------------------------------------------------------------------------------------------------------------------------------------------------------------------------------------------------------------------------------------------------------------------------------------------------------------------------------------------------------------------------------------------------------------------------------------------------------------------------------------------------------------------------------------------------------------------------------------------------------------------------------------------------------------------------------------------------------------------------------------------------------------------------------------------------------------------------------------------------------------------------------------------------------------------------------------------------------------------------------------------------------------------------------------------------------------------------------------------------------------------------------------------------------------------------------------------------------------------------------------------------------------------------------------------------------------------------------------------------------------------------------------------------------------------------------------------------------------------------------------------------------------------------------------------------------------------------------------------------------------------------------------------------------------------------------------------------------------------------------------------------------------------------------------------------------------------------------------------------------------------------------------------------------------------------------------------------------------------------------------------------------------------------------------------------------------------------------------------------------------------------------------------------------------------------------------------------------------------------------------------------------------------------------------------------------------------------------------------------------------------------------------------------------------------------------------------------------------------------------------------------------------------------------------------------------------------------------------------------------------------------------------------------------------------------------------------------------------------------------------------------------------------------------------------------------------------------------------------------------------------------------------------------------------------------------------------------------------------------------------------------------------------------------------------------------------------------------------------------------------------------------|--------|--|-------|------|---|--|-----|
| QL01630 | 1-Ethoxy-1,1,2,2,3,3,4,4,5,5,5-undecafluoropentane                 | 181214-75-5  | CCOC(F)(F)C(F)(F)C(F)(F)C(F)(F)F                                                                                                                                                                                                                                                                                                                                                                                                                                                                                                                                                                                                                                                                                                                                                                                                                                                                                                                                                                                                                                                                                                                                                                                                                                                                                                                                                                                                                                                                                                                                                                                                                                                                                                                                                                                                                                                                                                                                                                                                                                                                                                                                                                                                                                                                                                                                                                                                                                                                                                                                                                                                                                                                                                                                                                                                                                                                                                                                                                                                                                                                                                                                                                                                                                                                                                                                                                                                                                                                                                                                                                                                                                                                                                                                                                                                                                                                                                                                                                                                                                                                                                                                                                                                                                                                                                                                                                                                                                                                                                                                                                                                                                                                                                                                                                                                                                                                                                                                                                                                                                                                                                                                                                                                                                                                                                                                                                                                                                                       | -7.78  |  | 45.83 | 5.25 | P |  | IN  |
| QL01631 | 1-Ethoxy-1,1,2,2,3,3,3-hexafluoro-2-(trifluoromethyl)propane--:    | 813458-04-7  | CCOC(F)(F)C(F)(F)C(F)(F)C(F)F.F.CCOC(F)(F)C(F)(F)C(F)(F)C(F)(F)F                                                                                                                                                                                                                                                                                                                                                                                                                                                                                                                                                                                                                                                                                                                                                                                                                                                                                                                                                                                                                                                                                                                                                                                                                                                                                                                                                                                                                                                                                                                                                                                                                                                                                                                                                                                                                                                                                                                                                                                                                                                                                                                                                                                                                                                                                                                                                                                                                                                                                                                                                                                                                                                                                                                                                                                                                                                                                                                                                                                                                                                                                                                                                                                                                                                                                                                                                                                                                                                                                                                                                                                                                                                                                                                                                                                                                                                                                                                                                                                                                                                                                                                                                                                                                                                                                                                                                                                                                                                                                                                                                                                                                                                                                                                                                                                                                                                                                                                                                                                                                                                                                                                                                                                                                                                                                                                                                                                                                       | -8.48  |  | 42.86 | 5.61 | P |  | OUT |
| QL01632 | Diethoxymethyl(1H,1H,2H,2H-perfluoroheptyl)silane                  | 83038-83-9   | CCOC(OCC)[SiH2]CCC(F)(F)C(F)C(F)C(F)C(F)C(F)F                                                                                                                                                                                                                                                                                                                                                                                                                                                                                                                                                                                                                                                                                                                                                                                                                                                                                                                                                                                                                                                                                                                                                                                                                                                                                                                                                                                                                                                                                                                                                                                                                                                                                                                                                                                                                                                                                                                                                                                                                                                                                                                                                                                                                                                                                                                                                                                                                                                                                                                                                                                                                                                                                                                                                                                                                                                                                                                                                                                                                                                                                                                                                                                                                                                                                                                                                                                                                                                                                                                                                                                                                                                                                                                                                                                                                                                                                                                                                                                                                                                                                                                                                                                                                                                                                                                                                                                                                                                                                                                                                                                                                                                                                                                                                                                                                                                                                                                                                                                                                                                                                                                                                                                                                                                                                                                                                                                                                                          | -8.09  |  | 22.50 | 5.62 | P |  | OUT |
| QL01634 | 1-Ethoxy-4,4,5,5,6,6,6-heptafluorohex-1-en-3-one                   | 184783-37-7  | CCOC=CC(=O)C(F)(F)C(F)(F)C(F)F                                                                                                                                                                                                                                                                                                                                                                                                                                                                                                                                                                                                                                                                                                                                                                                                                                                                                                                                                                                                                                                                                                                                                                                                                                                                                                                                                                                                                                                                                                                                                                                                                                                                                                                                                                                                                                                                                                                                                                                                                                                                                                                                                                                                                                                                                                                                                                                                                                                                                                                                                                                                                                                                                                                                                                                                                                                                                                                                                                                                                                                                                                                                                                                                                                                                                                                                                                                                                                                                                                                                                                                                                                                                                                                                                                                                                                                                                                                                                                                                                                                                                                                                                                                                                                                                                                                                                                                                                                                                                                                                                                                                                                                                                                                                                                                                                                                                                                                                                                                                                                                                                                                                                                                                                                                                                                                                                                                                                                                         | -6.97  |  | 29.17 | 5.04 | P |  | OUT |
| QL01635 | 1-Ethoxy-3,3,4,4,5,5,6,6,6-nonafluorohexan-2-ol                    | 89807-88-5   | CCOCC(O)C(F)(F)C(F)(F)C(F)C(F)F                                                                                                                                                                                                                                                                                                                                                                                                                                                                                                                                                                                                                                                                                                                                                                                                                                                                                                                                                                                                                                                                                                                                                                                                                                                                                                                                                                                                                                                                                                                                                                                                                                                                                                                                                                                                                                                                                                                                                                                                                                                                                                                                                                                                                                                                                                                                                                                                                                                                                                                                                                                                                                                                                                                                                                                                                                                                                                                                                                                                                                                                                                                                                                                                                                                                                                                                                                                                                                                                                                                                                                                                                                                                                                                                                                                                                                                                                                                                                                                                                                                                                                                                                                                                                                                                                                                                                                                                                                                                                                                                                                                                                                                                                                                                                                                                                                                                                                                                                                                                                                                                                                                                                                                                                                                                                                                                                                                                                                                        | -7.49  |  | 32.14 | 5.25 | P |  | IN  |
| QL01636 | 1-Ethoxy-2-(1,1,2,2-tetrafluoroethoxy)ethane                       | 85567-23-3   | CCOCCOC(F)(F)C(F)F                                                                                                                                                                                                                                                                                                                                                                                                                                                                                                                                                                                                                                                                                                                                                                                                                                                                                                                                                                                                                                                                                                                                                                                                                                                                                                                                                                                                                                                                                                                                                                                                                                                                                                                                                                                                                                                                                                                                                                                                                                                                                                                                                                                                                                                                                                                                                                                                                                                                                                                                                                                                                                                                                                                                                                                                                                                                                                                                                                                                                                                                                                                                                                                                                                                                                                                                                                                                                                                                                                                                                                                                                                                                                                                                                                                                                                                                                                                                                                                                                                                                                                                                                                                                                                                                                                                                                                                                                                                                                                                                                                                                                                                                                                                                                                                                                                                                                                                                                                                                                                                                                                                                                                                                                                                                                                                                                                                                                                                                     | -5.32  |  | 18.18 | 4.37 | P |  | OUT |
| QL01637 | Diethyl(3,3,4,4,5,5,6,6,7,7,8,8,9,9,10,10,11,11,12,12-henico       | 854095-13-9  | CCOP(=O)(CCC(F)(F)C(F)C(F)(F)C(F)C(F)C(F)C(F)C(F)C(F)C(F)C(F)F)OCC                                                                                                                                                                                                                                                                                                                                                                                                                                                                                                                                                                                                                                                                                                                                                                                                                                                                                                                                                                                                                                                                                                                                                                                                                                                                                                                                                                                                                                                                                                                                                                                                                                                                                                                                                                                                                                                                                                                                                                                                                                                                                                                                                                                                                                                                                                                                                                                                                                                                                                                                                                                                                                                                                                                                                                                                                                                                                                                                                                                                                                                                                                                                                                                                                                                                                                                                                                                                                                                                                                                                                                                                                                                                                                                                                                                                                                                                                                                                                                                                                                                                                                                                                                                                                                                                                                                                                                                                                                                                                                                                                                                                                                                                                                                                                                                                                                                                                                                                                                                                                                                                                                                                                                                                                                                                                                                                                                                                                     | -10.84 |  | 38.18 | 6.76 | P |  | OUT |
| QL01638 | diethyl 3,3,4,4,5,5,6,6,7,7,8,8,9,9,10,10,10-heptadecafuoride      | 90146-96-6   | CCOP(=O)(CCC(F)(F)C(F)C(F)C(F)C(F)C(F)C(F)C(F)C(F)C(F)C(F)C(F)F)OCC                                                                                                                                                                                                                                                                                                                                                                                                                                                                                                                                                                                                                                                                                                                                                                                                                                                                                                                                                                                                                                                                                                                                                                                                                                                                                                                                                                                                                                                                                                                                                                                                                                                                                                                                                                                                                                                                                                                                                                                                                                                                                                                                                                                                                                                                                                                                                                                                                                                                                                                                                                                                                                                                                                                                                                                                                                                                                                                                                                                                                                                                                                                                                                                                                                                                                                                                                                                                                                                                                                                                                                                                                                                                                                                                                                                                                                                                                                                                                                                                                                                                                                                                                                                                                                                                                                                                                                                                                                                                                                                                                                                                                                                                                                                                                                                                                                                                                                                                                                                                                                                                                                                                                                                                                                                                                                                                                                                                                    | -10.10 |  | 34.69 | 6.45 | P |  | OUT |
| QL01639 | (3,3,4,4,5,5,6,6,7,7,8,8,8-Tridecafluoroctyl)phosphonic acid       | 350608-55-8  | CCOP(=O)(CCC(F)(F)C(F)C(F)C(F)C(F)C(F)C(F)C(F)C(F)F)OCC                                                                                                                                                                                                                                                                                                                                                                                                                                                                                                                                                                                                                                                                                                                                                                                                                                                                                                                                                                                                                                                                                                                                                                                                                                                                                                                                                                                                                                                                                                                                                                                                                                                                                                                                                                                                                                                                                                                                                                                                                                                                                                                                                                                                                                                                                                                                                                                                                                                                                                                                                                                                                                                                                                                                                                                                                                                                                                                                                                                                                                                                                                                                                                                                                                                                                                                                                                                                                                                                                                                                                                                                                                                                                                                                                                                                                                                                                                                                                                                                                                                                                                                                                                                                                                                                                                                                                                                                                                                                                                                                                                                                                                                                                                                                                                                                                                                                                                                                                                                                                                                                                                                                                                                                                                                                                                                                                                                                                                | -9.22  |  | 30.23 | 6.08 | P |  | OUT |
| QL01640 | Diethyl(3,3,4,4,5,5,6,6,6-nonafluoroheptyl)phosphate               | 627909-24-4  | CCOP(=O)(CCC(F)(F)C(F)C(F)C(F)C(F)C(F)F)OCC                                                                                                                                                                                                                                                                                                                                                                                                                                                                                                                                                                                                                                                                                                                                                                                                                                                                                                                                                                                                                                                                                                                                                                                                                                                                                                                                                                                                                                                                                                                                                                                                                                                                                                                                                                                                                                                                                                                                                                                                                                                                                                                                                                                                                                                                                                                                                                                                                                                                                                                                                                                                                                                                                                                                                                                                                                                                                                                                                                                                                                                                                                                                                                                                                                                                                                                                                                                                                                                                                                                                                                                                                                                                                                                                                                                                                                                                                                                                                                                                                                                                                                                                                                                                                                                                                                                                                                                                                                                                                                                                                                                                                                                                                                                                                                                                                                                                                                                                                                                                                                                                                                                                                                                                                                                                                                                                                                                                                                            | -8.13  |  | 24.32 | 5.62 | P |  | OUT |
| QL01641 | Phosphonous acid, ethyl-, diethyl ester, compd. with 1,1,1,2,2,    | 72220-37-2   | CCOP(CC)OCC.F.C(F)(F)C(F)C(F)F                                                                                                                                                                                                                                                                                                                                                                                                                                                                                                                                                                                                                                                                                                                                                                                                                                                                                                                                                                                                                                                                                                                                                                                                                                                                                                                                                                                                                                                                                                                                                                                                                                                                                                                                                                                                                                                                                                                                                                                                                                                                                                                                                                                                                                                                                                                                                                                                                                                                                                                                                                                                                                                                                                                                                                                                                                                                                                                                                                                                                                                                                                                                                                                                                                                                                                                                                                                                                                                                                                                                                                                                                                                                                                                                                                                                                                                                                                                                                                                                                                                                                                                                                                                                                                                                                                                                                                                                                                                                                                                                                                                                                                                                                                                                                                                                                                                                                                                                                                                                                                                                                                                                                                                                                                                                                                                                                                                                                                                         | -6.16  |  | 22.86 | 4.72 | P |  | OUT |
| QL01642 | Phosphonous acid, ethyl-, diethyl ether, compd. with 1,1,1,2,2,    | 72220-43-0   | CCOP(CC)OCC.F.C(F)(F)C(F)C(F)F                                                                                                                                                                                                                                                                                                                                                                                                                                                                                                                                                                                                                                                                                                                                                                                                                                                                                                                                                                                                                                                                                                                                                                                                                                                                                                                                                                                                                                                                                                                                                                                                                                                                                                                                                                                                                                                                                                                                                                                                                                                                                                                                                                                                                                                                                                                                                                                                                                                                                                                                                                                                                                                                                                                                                                                                                                                                                                                                                                                                                                                                                                                                                                                                                                                                                                                                                                                                                                                                                                                                                                                                                                                                                                                                                                                                                                                                                                                                                                                                                                                                                                                                                                                                                                                                                                                                                                                                                                                                                                                                                                                                                                                                                                                                                                                                                                                                                                                                                                                                                                                                                                                                                                                                                                                                                                                                                                                                                                                         | -6.16  |  | 22.86 | 4.72 | P |  | OUT |
| QL01643 | Ethyl hydrogen (3,3,4,4,5,5,6,6,7,7,8,8,8-tridecafluoroctyl)ph     | 1189052-97-8 | CCOP(O)=O(CCC(F)(F)C(F)C(F)C(F)C(F)C(F)C(F)C(F)C(F)F                                                                                                                                                                                                                                                                                                                                                                                                                                                                                                                                                                                                                                                                                                                                                                                                                                                                                                                                                                                                                                                                                                                                                                                                                                                                                                                                                                                                                                                                                                                                                                                                                                                                                                                                                                                                                                                                                                                                                                                                                                                                                                                                                                                                                                                                                                                                                                                                                                                                                                                                                                                                                                                                                                                                                                                                                                                                                                                                                                                                                                                                                                                                                                                                                                                                                                                                                                                                                                                                                                                                                                                                                                                                                                                                                                                                                                                                                                                                                                                                                                                                                                                                                                                                                                                                                                                                                                                                                                                                                                                                                                                                                                                                                                                                                                                                                                                                                                                                                                                                                                                                                                                                                                                                                                                                                                                                                                                                                                   | -9.02  |  | 35.14 | 5.94 | P |  | IN  |
| QL01644 | Ethyl 5,5,6,6,7,7,8,8,8-nonafluorooctane-1-sulfonate               | 1604816-68-3 | CCOS(=O)(=O)CCCC(F)(F)C(F)C(F)C(F)C(F)F                                                                                                                                                                                                                                                                                                                                                                                                                                                                                                                                                                                                                                                                                                                                                                                                                                                                                                                                                                                                                                                                                                                                                                                                                                                                                                                                                                                                                                                                                                                                                                                                                                                                                                                                                                                                                                                                                                                                                                                                                                                                                                                                                                                                                                                                                                                                                                                                                                                                                                                                                                                                                                                                                                                                                                                                                                                                                                                                                                                                                                                                                                                                                                                                                                                                                                                                                                                                                                                                                                                                                                                                                                                                                                                                                                                                                                                                                                                                                                                                                                                                                                                                                                                                                                                                                                                                                                                                                                                                                                                                                                                                                                                                                                                                                                                                                                                                                                                                                                                                                                                                                                                                                                                                                                                                                                                                                                                                                                                | -8.14  |  | 25.00 | 6.62 | P |  | OUT |
| QL01645 | Silver, (6,6,7,7,8,8,8-heptafluoro-2,2-dimethyl-3,5-octanedio      | 165461-74-5  | CCP(Cl)(Cl)Ag[10C](CCO1)C(F)(F)C(F)C(F)C(F)C(F)C(C)C                                                                                                                                                                                                                                                                                                                                                                                                                                                                                                                                                                                                                                                                                                                                                                                                                                                                                                                                                                                                                                                                                                                                                                                                                                                                                                                                                                                                                                                                                                                                                                                                                                                                                                                                                                                                                                                                                                                                                                                                                                                                                                                                                                                                                                                                                                                                                                                                                                                                                                                                                                                                                                                                                                                                                                                                                                                                                                                                                                                                                                                                                                                                                                                                                                                                                                                                                                                                                                                                                                                                                                                                                                                                                                                                                                                                                                                                                                                                                                                                                                                                                                                                                                                                                                                                                                                                                                                                                                                                                                                                                                                                                                                                                                                                                                                                                                                                                                                                                                                                                                                                                                                                                                                                                                                                                                                                                                                                                                   | -9.66  |  | 12.50 | 5.46 | P |  | OUT |
| QL01646 | 3-[Ethanesulfonyl]-4-{1,1,1,2,2,3,3,3-heptafluoropropan-2-yl}-2-   | 1355554-44-7 | CCS(=O)(=O)c1c2C(c)ccc1C(F)(C(F)F)C(F)C(F)C(F)C(O)=O                                                                                                                                                                                                                                                                                                                                                                                                                                                                                                                                                                                                                                                                                                                                                                                                                                                                                                                                                                                                                                                                                                                                                                                                                                                                                                                                                                                                                                                                                                                                                                                                                                                                                                                                                                                                                                                                                                                                                                                                                                                                                                                                                                                                                                                                                                                                                                                                                                                                                                                                                                                                                                                                                                                                                                                                                                                                                                                                                                                                                                                                                                                                                                                                                                                                                                                                                                                                                                                                                                                                                                                                                                                                                                                                                                                                                                                                                                                                                                                                                                                                                                                                                                                                                                                                                                                                                                                                                                                                                                                                                                                                                                                                                                                                                                                                                                                                                                                                                                                                                                                                                                                                                                                                                                                                                                                                                                                                                                   | -9.48  |  | 19.44 | 6.31 | P |  | OUT |
| QL01647 | 3-[Ethanesulfonyl]-4-{1,1,1,2,2,3,3,3-heptafluoropropan-2-yl)-2-i  | 1355554-21-0 | CCS(=O)(=O)c1c2C(c)ccc1C(F)(C(F)F)C(F)C(F)C(F)C(O)=O                                                                                                                                                                                                                                                                                                                                                                                                                                                                                                                                                                                                                                                                                                                                                                                                                                                                                                                                                                                                                                                                                                                                                                                                                                                                                                                                                                                                                                                                                                                                                                                                                                                                                                                                                                                                                                                                                                                                                                                                                                                                                                                                                                                                                                                                                                                                                                                                                                                                                                                                                                                                                                                                                                                                                                                                                                                                                                                                                                                                                                                                                                                                                                                                                                                                                                                                                                                                                                                                                                                                                                                                                                                                                                                                                                                                                                                                                                                                                                                                                                                                                                                                                                                                                                                                                                                                                                                                                                                                                                                                                                                                                                                                                                                                                                                                                                                                                                                                                                                                                                                                                                                                                                                                                                                                                                                                                                                                                                   | -9.32  |  | 20.00 | 6.22 | P |  | OUT |
| QL01648 | S-Ethyl 3,3,4,4,5,5,5-heptafluoro-2-(2-oxopropyl)pentanethioi      | 1392881-17-2 | CCSC(=O)C(CC(C)=O)C(F)(F)C(F)C(F)C(F)F                                                                                                                                                                                                                                                                                                                                                                                                                                                                                                                                                                                                                                                                                                                                                                                                                                                                                                                                                                                                                                                                                                                                                                                                                                                                                                                                                                                                                                                                                                                                                                                                                                                                                                                                                                                                                                                                                                                                                                                                                                                                                                                                                                                                                                                                                                                                                                                                                                                                                                                                                                                                                                                                                                                                                                                                                                                                                                                                                                                                                                                                                                                                                                                                                                                                                                                                                                                                                                                                                                                                                                                                                                                                                                                                                                                                                                                                                                                                                                                                                                                                                                                                                                                                                                                                                                                                                                                                                                                                                                                                                                                                                                                                                                                                                                                                                                                                                                                                                                                                                                                                                                                                                                                                                                                                                                                                                                                                                                                 | -7.51  |  | 22.58 | 5.35 | P |  | OUT |
| QL01649 | 4,4-Bis(ethylsulfonyl)-1,1,1,2,2,3,3-heptafluorobutane             | 145327-73-7  | CCSC(SCC)C(F)(F)C(F)C(F)F                                                                                                                                                                                                                                                                                                                                                                                                                                                                                                                                                                                                                                                                                                                                                                                                                                                                                                                                                                                                                                                                                                                                                                                                                                                                                                                                                                                                                                                                                                                                                                                                                                                                                                                                                                                                                                                                                                                                                                                                                                                                                                                                                                                                                                                                                                                                                                                                                                                                                                                                                                                                                                                                                                                                                                                                                                                                                                                                                                                                                                                                                                                                                                                                                                                                                                                                                                                                                                                                                                                                                                                                                                                                                                                                                                                                                                                                                                                                                                                                                                                                                                                                                                                                                                                                                                                                                                                                                                                                                                                                                                                                                                                                                                                                                                                                                                                                                                                                                                                                                                                                                                                                                                                                                                                                                                                                                                                                                                                              | -6.89  |  | 25.00 | 5.04 | P |  | OUT |
| QL01650 | 3-[Ethyldisulfonyl]-4-{1,1,1,2,2,3,3,3-heptafluoropropan-2-yl)-2-m | 1355553-99-9 | CCSc1c(C)ccc1C(F)(C(F)F)C(F)C(F)C(F)C(O)=O                                                                                                                                                                                                                                                                                                                                                                                                                                                                                                                                                                                                                                                                                                                                                                                                                                                                                                                                                                                                                                                                                                                                                                                                                                                                                                                                                                                                                                                                                                                                                                                                                                                                                                                                                                                                                                                                                                                                                                                                                                                                                                                                                                                                                                                                                                                                                                                                                                                                                                                                                                                                                                                                                                                                                                                                                                                                                                                                                                                                                                                                                                                                                                                                                                                                                                                                                                                                                                                                                                                                                                                                                                                                                                                                                                                                                                                                                                                                                                                                                                                                                                                                                                                                                                                                                                                                                                                                                                                                                                                                                                                                                                                                                                                                                                                                                                                                                                                                                                                                                                                                                                                                                                                                                                                                                                                                                                                                                                             | -9.14  |  | 20.59 | 6.14 | P |  | OUT |
| QL01651 | 2-Ethyl-3-[ethylsulfonyl]-4-{1,1,1,2,2,3,3,3-heptafluoropropan-2-  | 1355554-66-3 | CCSc1c(C)ccc1C(F)(C(F)F)C(F)C(F)C(F)C(O)=O                                                                                                                                                                                                                                                                                                                                                                                                                                                                                                                                                                                                                                                                                                                                                                                                                                                                                                                                                                                                                                                                                                                                                                                                                                                                                                                                                                                                                                                                                                                                                                                                                                                                                                                                                                                                                                                                                                                                                                                                                                                                                                                                                                                                                                                                                                                                                                                                                                                                                                                                                                                                                                                                                                                                                                                                                                                                                                                                                                                                                                                                                                                                                                                                                                                                                                                                                                                                                                                                                                                                                                                                                                                                                                                                                                                                                                                                                                                                                                                                                                                                                                                                                                                                                                                                                                                                                                                                                                                                                                                                                                                                                                                                                                                                                                                                                                                                                                                                                                                                                                                                                                                                                                                                                                                                                                                                                                                                                                             | -9.30  |  | 18.92 | 6.23 | P |  | OUT |
| QL01652 | 2-Ethyl-3,3,4,4,5,5,5-heptafluoropentane-1-amine--hydrogen c       | 308-38-3     | CL.CCC(CN)C(F)(F)C(F)C(F)F                                                                                                                                                                                                                                                                                                                                                                                                                                                                                                                                                                                                                                                                                                                                                                                                                                                                                                                                                                                                                                                                                                                                                                                                                                                                                                                                                                                                                                                                                                                                                                                                                                                                                                                                                                                                                                                                                                                                                                                                                                                                                                                                                                                                                                                                                                                                                                                                                                                                                                                                                                                                                                                                                                                                                                                                                                                                                                                                                                                                                                                                                                                                                                                                                                                                                                                                                                                                                                                                                                                                                                                                                                                                                                                                                                                                                                                                                                                                                                                                                                                                                                                                                                                                                                                                                                                                                                                                                                                                                                                                                                                                                                                                                                                                                                                                                                                                                                                                                                                                                                                                                                                                                                                                                                                                                                                                                                                                                                                             | -6.49  |  | 29.63 | 4.80 | P |  | OUT |
| QL01653 | 5-Amino -1,1,2,2,3,3-heptafluoroheptan-4-ol--hydrogen chlo         | 308-37-2     | CL.CCC(N)C(O)C(F)(F)C(F)C(F)F                                                                                                                                                                                                                                                                                                                                                                                                                                                                                                                                                                                                                                                                                                                                                                                                                                                                                                                                                                                                                                                                                                                                                                                                                                                                                                                                                                                                                                                                                                                                                                                                                                                                                                                                                                                                                                                                                                                                                                                                                                                                                                                                                                                                                                                                                                                                                                                                                                                                                                                                                                                                                                                                                                                                                                                                                                                                                                                                                                                                                                                                                                                                                                                                                                                                                                                                                                                                                                                                                                                                                                                                                                                                                                                                                                                                                                                                                                                                                                                                                                                                                                                                                                                                                                                                                                                                                                                                                                                                                                                                                                                                                                                                                                                                                                                                                                                                                                                                                                                                                                                                                                                                                                                                                                                                                                                                                                                                                                                          | -6.73  |  | 29.57 | 4.93 | P |  | OUT |
| QL01654 | 5,5,6,6,7,7,7-Heptrafluoroheptan-3-amine--hydrogen chloride        | 2263-70-9    | CL.CCC(N)CC(F)(F)C(F)C(F)C(F)F                                                                                                                                                                                                                                                                                                                                                                                                                                                                                                                                                                                                                                                                                                                                                                                                                                                                                                                                                                                                                                                                                                                                                                                                                                                                                                                                                                                                                                                                                                                                                                                                                                                                                                                                                                                                                                                                                                                                                                                                                                                                                                                                                                                                                                                                                                                                                                                                                                                                                                                                                                                                                                                                                                                                                                                                                                                                                                                                                                                                                                                                                                                                                                                                                                                                                                                                                                                                                                                                                                                                                                                                                                                                                                                                                                                                                                                                                                                                                                                                                                                                                                                                                                                                                                                                                                                                                                                                                                                                                                                                                                                                                                                                                                                                                                                                                                                                                                                                                                                                                                                                                                                                                                                                                                                                                                                                                                                                                                                         | -6.49  |  | 29.63 | 4.80 | P |  | OUT |
| QL01655 | N-[3-(dimethylamino)propyl]heptadecafuorooctanesulphonha           | 67939-88-2   | CL.CN(C)CCCCNS(=O)(=O)C(F)C(F)C(F)C(F)C(F)C(F)C(F)C(F)C(F)F                                                                                                                                                                                                                                                                                                                                                                                                                                                                                                                                                                                                                                                                                                                                                                                                                                                                                                                                                                                                                                                                                                                                                                                                                                                                                                                                                                                                                                                                                                                                                                                                                                                                                                                                                                                                                                                                                                                                                                                                                                                                                                                                                                                                                                                                                                                                                                                                                                                                                                                                                                                                                                                                                                                                                                                                                                                                                                                                                                                                                                                                                                                                                                                                                                                                                                                                                                                                                                                                                                                                                                                                                                                                                                                                                                                                                                                                                                                                                                                                                                                                                                                                                                                                                                                                                                                                                                                                                                                                                                                                                                                                                                                                                                                                                                                                                                                                                                                                                                                                                                                                                                                                                                                                                                                                                                                                                                                                                            | -10.13 |  | 36.00 | 6.45 | P |  | OUT |
| QL01656 | N-[3-(dimethylamino)propyl]-1,1,2,2,3,3,4,4,5,5,6,6,7,7-pent       | 67940-02-7   | CL.CN(C)CCCCNS(=O)(=O)C(F)C(F)C(F)C(F)C(F)C(F)C(F)C(F)F                                                                                                                                                                                                                                                                                                                                                                                                                                                                                                                                                                                                                                                                                                                                                                                                                                                                                                                                                                                                                                                                                                                                                                                                                                                                                                                                                                                                                                                                                                                                                                                                                                                                                                                                                                                                                                                                                                                                                                                                                                                                                                                                                                                                                                                                                                                                                                                                                                                                                                                                                                                                                                                                                                                                                                                                                                                                                                                                                                                                                                                                                                                                                                                                                                                                                                                                                                                                                                                                                                                                                                                                                                                                                                                                                                                                                                                                                                                                                                                                                                                                                                                                                                                                                                                                                                                                                                                                                                                                                                                                                                                                                                                                                                                                                                                                                                                                                                                                                                                                                                                                                                                                                                                                                                                                                                                                                                                                                                | -9.71  |  | 34.04 | 6.27 | P |  | OUT |
| QL01657 | N-[3-(dimethylamino)propyl]tridecafluorohexanesulphonamic          | 68957-61-9   | CL.CN(C)CCCCNS(=O)(=O)C(F)C(F)C(F)C(F)C(F)C(F)C(F)C(F)F                                                                                                                                                                                                                                                                                                                                                                                                                                                                                                                                                                                                                                                                                                                                                                                                                                                                                                                                                                                                                                                                                                                                                                                                                                                                                                                                                                                                                                                                                                                                                                                                                                                                                                                                                                                                                                                                                                                                                                                                                                                                                                                                                                                                                                                                                                                                                                                                                                                                                                                                                                                                                                                                                                                                                                                                                                                                                                                                                                                                                                                                                                                                                                                                                                                                                                                                                                                                                                                                                                                                                                                                                                                                                                                                                                                                                                                                                                                                                                                                                                                                                                                                                                                                                                                                                                                                                                                                                                                                                                                                                                                                                                                                                                                                                                                                                                                                                                                                                                                                                                                                                                                                                                                                                                                                                                                                                                                                                                | -9.26  |  | 31.82 | 6.08 | P |  | OUT |
| QL01658 | N-[3-(dimethylamino)propyl]-1,1,2,2,3,3,4,4,5,5,5-undecafluor      | 68957-60-8   | CL.CN(C)CCCCNS(=O)(=O)C(F)C(F)C(F)C(F)C(F)C(F)C(F)F                                                                                                                                                                                                                                                                                                                                                                                                                                                                                                                                                                                                                                                                                                                                                                                                                                                                                                                                                                                                                                                                                                                                                                                                                                                                                                                                                                                                                                                                                                                                                                                                                                                                                                                                                                                                                                                                                                                                                                                                                                                                                                                                                                                                                                                                                                                                                                                                                                                                                                                                                                                                                                                                                                                                                                                                                                                                                                                                                                                                                                                                                                                                                                                                                                                                                                                                                                                                                                                                                                                                                                                                                                                                                                                                                                                                                                                                                                                                                                                                                                                                                                                                                                                                                                                                                                                                                                                                                                                                                                                                                                                                                                                                                                                                                                                                                                                                                                                                                                                                                                                                                                                                                                                                                                                                                                                                                                                                                                    | -8.75  |  | 29.27 | 5.87 | P |  | OUT |
| QL01659 | N-[3-(dimethylamino)propyl]-1,1,2,2,3,3,4,4,4-nonafluorobut        | 68957-59-5   | CL.CN(C)CCCCNS(=O)(=O)C(F)C(F)C(F)C(F)C(F)F                                                                                                                                                                                                                                                                                                                                                                                                                                                                                                                                                                                                                                                                                                                                                                                                                                                                                                                                                                                                                                                                                                                                                                                                                                                                                                                                                                                                                                                                                                                                                                                                                                                                                                                                                                                                                                                                                                                                                                                                                                                                                                                                                                                                                                                                                                                                                                                                                                                                                                                                                                                                                                                                                                                                                                                                                                                                                                                                                                                                                                                                                                                                                                                                                                                                                                                                                                                                                                                                                                                                                                                                                                                                                                                                                                                                                                                                                                                                                                                                                                                                                                                                                                                                                                                                                                                                                                                                                                                                                                                                                                                                                                                                                                                                                                                                                                                                                                                                                                                                                                                                                                                                                                                                                                                                                                                                                                                                                                            | -8.17  |  | 26.32 | 5.63 | P |  | OUT |
| QL01660 | N-[4-(Nonafluorobutoxy)phenyl]pyridine-3-carboxamide--hyd          | 62315-22-4   | CL.FC(F)(F)C(F)C(F)C(F)C(F)F)Oc1cccc(NC(=O)c2ccncc2)c1                                                                                                                                                                                                                                                                                                                                                                                                                                                                                                                                                                                                                                                                                                                                                                                                                                                                                                                                                                                                                                                                                                                                                                                                                                                                                                                                                                                                                                                                                                                                                                                                                                                                                                                                                                                                                                                                                                                                                                                                                                                                                                                                                                                                                                                                                                                                                                                                                                                                                                                                                                                                                                                                                                                                                                                                                                                                                                                                                                                                                                                                                                                                                                                                                                                                                                                                                                                                                                                                                                                                                                                                                                                                                                                                                                                                                                                                                                                                                                                                                                                                                                                                                                                                                                                                                                                                                                                                                                                                                                                                                                                                                                                                                                                                                                                                                                                                                                                                                                                                                                                                                                                                                                                                                                                                                                                                                                                                                                 | -10.70 |  | 25.00 | 6.82 | P |  | OUT |
| QL01661 | N-[4-(Nonafluorobutoxy)phenyl]pyridine-4-carboxamide--hyd          | 62315-29-1   | CL.FC(F)(F)C(F)C(F)C(F)C(F)C(F)F)Oc1cccc(NC(=O)c2ccncc2)c1                                                                                                                                                                                                                                                                                                                                                                                                                                                                                                                                                                                                                                                                                                                                                                                                                                                                                                                                                                                                                                                                                                                                                                                                                                                                                                                                                                                                                                                                                                                                                                                                                                                                                                                                                                                                                                                                                                                                                                                                                                                                                                                                                                                                                                                                                                                                                                                                                                                                                                                                                                                                                                                                                                                                                                                                                                                                                                                                                                                                                                                                                                                                                                                                                                                                                                                                                                                                                                                                                                                                                                                                                                                                                                                                                                                                                                                                                                                                                                                                                                                                                                                                                                                                                                                                                                                                                                                                                                                                                                                                                                                                                                                                                                                                                                                                                                                                                                                                                                                                                                                                                                                                                                                                                                                                                                                                                                                                                             | -10.70 |  | 25.00 | 6.82 | P |  | OUT |
| QL01662 | 3,3,4,4-Tetrafluoropyridoline Hydrochloride                        | 1810-13-5    | CL.FC1(F)CNCC1(F)F                                                                                                                                                                                                                                                                                                                                                                                                                                                                                                                                                                                                                                                                                                                                                                                                                                                                                                                                                                                                                                                                                                                                                                                                                                                                                                                                                                                                                                                                                                                                                                                                                                                                                                                                                                                                                                                                                                                                                                                                                                                                                                                                                                                                                                                                                                                                                                                                                                                                                                                                                                                                                                                                                                                                                                                                                                                                                                                                                                                                                                                                                                                                                                                                                                                                                                                                                                                                                                                                                                                                                                                                                                                                                                                                                                                                                                                                                                                                                                                                                                                                                                                                                                                                                                                                                                                                                                                                                                                                                                                                                                                                                                                                                                                                                                                                                                                                                                                                                                                                                                                                                                                                                                                                                                                                                                                                                                                                                                                                     | -5.54  |  | 31.25 | 4.34 | P |  | IN  |
| QL01663 | 2,2,3,3,4,4,4-Heptrafluorobutanimidamide--hydrogen chloride        | 2358-53-4    | CL.NC(=N)C(F)(F)C(F)C(F)F                                                                                                                                                                                                                                                                                                                                                                                                                                                                                                                                                                                                                                                                                                                                                                                                                                                                                                                                                                                                                                                                                                                                                                                                                                                                                                                                                                                                                                                                                                                                                                                                                                                                                                                                                                                                                                                                                                                                                                                                                                                                                                                                                                                                                                                                                                                                                                                                                                                                                                                                                                                                                                                                                                                                                                                                                                                                                                                                                                                                                                                                                                                                                                                                                                                                                                                                                                                                                                                                                                                                                                                                                                                                                                                                                                                                                                                                                                                                                                                                                                                                                                                                                                                                                                                                                                                                                                                                                                                                                                                                                                                                                                                                                                                                                                                                                                                                                                                                                                                                                                                                                                                                                                                                                                                                                                                                                                                                                                                              | -6.21  |  | 44.44 | 4.53 | P |  | IN  |
| QL01664 | 2,2,3,3,4,4,5,5,6,6,7,7,8,8,8-Pentadecafuorooctan-1-amine--h       | 5678-75-1    | CL.NCC(F)(F)C(F)C(F)C(F)C(F)C(F)C(F)C(F)C(F)C(F)C(F)F                                                                                                                                                                                                                                                                                                                                                                                                                                                                                                                                                                                                                                                                                                                                                                                                                                                                                                                                                                                                                                                                                                                                                                                                                                                                                                                                                                                                                                                                                                                                                                                                                                                                                                                                                                                                                                                                                                                                                                                                                                                                                                                                                                                                                                                                                                                                                                                                                                                                                                                                                                                                                                                                                                                                                                                                                                                                                                                                                                                                                                                                                                                                                                                                                                                                                                                                                                                                                                                                                                                                                                                                                                                                                                                                                                                                                                                                                                                                                                                                                                                                                                                                                                                                                                                                                                                                                                                                                                                                                                                                                                                                                                                                                                                                                                                                                                                                                                                                                                                                                                                                                                                                                                                                                                                                                                                                                                                                                                  | -8.91  |  | 53.33 | 5.71 | P |  | IN  |
| QL01665 | 2,2,3,3,4,4,4-Heptrafluorobutan-1-amine--hydrogen chloride (I      | 2794-75-4    | CL.NCC(F)(F)C(F)C(F)C(F)F                                                                                                                                                                                                                                                                                                                                                                                                                                                                                                                                                                                                                                                                                                                                                                                                                                                                                                                                                                                                                                                                                                                                                                                                                                                                                                                                                                                                                                                                                                                                                                                                                                                                                                                                                                                                                                                                                                                                                                                                                                                                                                                                                                                                                                                                                                                                                                                                                                                                                                                                                                                                                                                                                                                                                                                                                                                                                                                                                                                                                                                                                                                                                                                                                                                                                                                                                                                                                                                                                                                                                                                                                                                                                                                                                                                                                                                                                                                                                                                                                                                                                                                                                                                                                                                                                                                                                                                                                                                                                                                                                                                                                                                                                                                                                                                                                                                                                                                                                                                                                                                                                                                                                                                                                                                                                                                                                                                                                                                              | -5.89  |  | 44.44 | 4.38 | P |  | IN  |
| QL01666 | O-4,4,5,5,6,6,7,7,8,8,9,9,10,10,11,11-Heptrafluoround              | 1228693-32-0 | CL.NOCCCC(F)(F)C(F)C(F)C(F)C(F)C(F)C(F)C(F)C(F)C(F)F                                                                                                                                                                                                                                                                                                                                                                                                                                                                                                                                                                                                                                                                                                                                                                                                                                                                                                                                                                                                                                                                                                                                                                                                                                                                                                                                                                                                                                                                                                                                                                                                                                                                                                                                                                                                                                                                                                                                                                                                                                                                                                                                                                                                                                                                                                                                                                                                                                                                                                                                                                                                                                                                                                                                                                                                                                                                                                                                                                                                                                                                                                                                                                                                                                                                                                                                                                                                                                                                                                                                                                                                                                                                                                                                                                                                                                                                                                                                                                                                                                                                                                                                                                                                                                                                                                                                                                                                                                                                                                                                                                                                                                                                                                                                                                                                                                                                                                                                                                                                                                                                                                                                                                                                                                                                                                                                                                                                                                   | -9.67  |  | 45.00 | 6.15 | P |  | IN  |
| QL01667 | 2,2,3,3,4,4,5,5,6,6,7,7,7-Tridecafluoro-1-1,4-(2-hydroxyethyl)3    | 95851-62-0   | CL.OCCNC1CCN(CC1)C(=O)C(F)(F)C(F)C(F)C(F)C(F)C(F)C(F)C(F)F                                                                                                                                                                                                                                                                                                                                                                                                                                                                                                                                                                                                                                                                                                                                                                                                                                                                                                                                                                                                                                                                                                                                                                                                                                                                                                                                                                                                                                                                                                                                                                                                                                                                                                                                                                                                                                                                                                                                                                                                                                                                                                                                                                                                                                                                                                                                                                                                                                                                                                                                                                                                                                                                                                                                                                                                                                                                                                                                                                                                                                                                                                                                                                                                                                                                                                                                                                                                                                                                                                                                                                                                                                                                                                                                                                                                                                                                                                                                                                                                                                                                                                                                                                                                                                                                                                                                                                                                                                                                                                                                                                                                                                                                                                                                                                                                                                                                                                                                                                                                                                                                                                                                                                                                                                                                                                                                                                                                                             | -10.14 |  | 31.11 | 6.50 | P |  | OUT |
|         |                                                                    |              | CL[Pd]Cl.FC(F)(F)C(F)(F)C(F)(F)C(F)(F)C(F)(F)C(F)(F)C(F)(F)C(F)(F)C(F)(F)C(F)(F)C(F)(F)C(F)(F)C(F)(F)C(F)(F)C(F)(F)C(F)(F)C(F)(F)C(F)(F)C(F)(F)C(F)(F)C(F)(F)C(F)(F)C(F)(F)C(F)(F)C(F)(F)C(F)(F)C(F)(F)C(F)(F)C(F)(F)C(F)(F)C(F)(F)C(F)(F)C(F)(F)C(F)(F)C(F)(F)C(F)(F)C(F)(F)C(F)(F)C(F)(F)C(F)(F)C(F)(F)C(F)(F)C(F)(F)C(F)(F)C(F)(F)C(F)(F)C(F)(F)C(F)(F)C(F)(F)C(F)(F)C(F)(F)C(F)(F)C(F)(F)C(F)(F)C(F)(F)C(F)(F)C(F)(F)C(F)(F)C(F)(F)C(F)(F)C(F)(F)C(F)(F)C(F)(F)C(F)(F)C(F)(F)C(F)(F)C(F)(F)C(F)(F)C(F)(F)C(F)(F)C(F)(F)C(F)(F)C(F)(F)C(F)(F)C(F)(F)C(F)(F)C(F)(F)C(F)(F)C(F)(F)C(F)(F)C(F)(F)C(F)(F)C(F)(F)C(F)(F)C(F)(F)C(F)(F)C(F)(F)C(F)(F)C(F)(F)C(F)(F)C(F)(F)C(F)(F)C(F)(F)C(F)(F)C(F)(F)C(F)(F)C(F)(F)C(F)(F)C(F)(F)C(F)(F)C(F)(F)C(F)(F)C(F)(F)C(F)(F)C(F)(F)C(F)(F)C(F)(F)C(F)(F)C(F)(F)C(F)(F)C(F)(F)C(F)(F)C(F)(F)C(F)(F)C(F)(F)C(F)(F)C(F)(F)C(F)(F)C(F)(F)C(F)(F)C(F)(F)C(F)(F)C(F)(F)C(F)(F)C(F)(F)C(F)(F)C(F)(F)C(F)(F)C(F)(F)C(F)(F)C(F)(F)C(F)(F)C(F)(F)C(F)(F)C(F)(F)C(F)(F)C(F)(F)C(F)(F)C(F)(F)C(F)(F)C(F)(F)C(F)(F)C(F)(F)C(F)(F)C(F)(F)C(F)(F)C(F)(F)C(F)(F)C(F)(F)C(F)(F)C(F)(F)C(F)(F)C(F)(F)C(F)(F)C(F)(F)C(F)(F)C(F)(F)C(F)(F)C(F)(F)C(F)(F)C(F)(F)C(F)(F)C(F)(F)C(F)(F)C(F)(F)C(F)(F)C(F)(F)C(F)(F)C(F)(F)C(F)(F)C(F)(F)C(F)(F)C(F)(F)C(F)(F)C(F)(F)C(F)(F)C(F)(F)C(F)(F)C(F)(F)C(F)(F)C(F)(F)C(F)(F)C(F)(F)C(F)(F)C(F)(F)C(F)(F)C(F)(F)C(F)(F)C(F)(F)C(F)(F)C(F)(F)C(F)(F)C(F)(F)C(F)(F)C(F)(F)C(F)(F)C(F)(F)C(F)(F)C(F)(F)C(F)(F)C(F)(F)C(F)(F)C(F)(F)C(F)(F)C(F)(F)C(F)(F)C(F)(F)C(F)(F)C(F)(F)C(F)(F)C(F)(F)C(F)(F)C(F)(F)C(F)(F)C(F)(F)C(F)(F)C(F)(F)C(F)(F)C(F)(F)C(F)(F)C(F)(F)C(F)(F)C(F)(F)C(F)(F)C(F)(F)C(F)(F)C(F)(F)C(F)(F)C(F)(F)C(F)(F)C(F)(F)C(F)(F)C(F)(F)C(F)(F)C(F)(F)C(F)(F)C(F)(F)C(F)(F)C(F)(F)C(F)(F)C(F)(F)C(F)(F)C(F)(F)C(F)(F)C(F)(F)C(F)(F)C(F)(F)C(F)(F)C(F)(F)C(F)(F)C(F)(F)C(F)(F)C(F)(F)C(F)(F)C(F)(F)C(F)(F)C(F)(F)C(F)(F)C(F)(F)C(F)(F)C(F)(F)C(F)(F)C(F)(F)C(F)(F)C(F)(F)C(F)(F)C(F)(F)C(F)(F)C(F)(F)C(F)(F)C(F)(F)C(F)(F)C(F)(F)C(F)(F)C(F)(F)C(F)(F)C(F)(F)C(F)(F)C(F)(F)C(F)(F)C(F)(F)C(F)(F)C(F)(F)C(F)(F)C(F)(F)C(F)(F)C(F)(F)C(F)(F)C(F)(F)C(F)(F)C(F)(F)C(F)(F)C(F)(F)C(F)(F)C(F)(F)C(F)(F)C(F)(F)C(F)(F)C(F)(F)C(F)(F)C(F)(F)C(F)(F)C(F)(F)C(F)(F)C(F)(F)C(F)(F)C(F)(F)C(F)(F)C(F)(F)C(F)(F)C(F)(F)C(F)(F)C(F)(F)C(F)(F)C(F)(F)C(F)(F)C(F)(F)C(F)(F)C(F)(F)C(F)(F)C(F)(F)C(F)(F)C(F)(F)C(F)(F)C(F)(F)C(F)(F)C(F)(F)C(F)(F)C(F)(F)C(F)(F)C(F)(F)C(F)(F)C(F)(F)C(F)(F)C(F)(F)C(F)(F)C(F)(F)C(F)(F)C(F)(F)C(F)(F)C(F)(F)C(F)(F)C(F)(F)C(F)(F)C(F)(F)C(F)(F)C(F)(F)C(F)(F)C(F)(F)C(F)(F)C(F)(F)C(F)(F)C(F)(F)C(F)(F)C(F)(F)C(F)(F)C(F)(F)C(F)(F)C(F)(F)C(F)(F)C(F)(F)C(F)(F)C(F)(F)C(F)(F)C(F)(F)C(F)(F)C(F)(F)C(F)(F)C(F)(F)C(F)(F)C(F)(F)C(F)(F)C(F)(F)C(F)(F)C(F)(F)C(F)(F)C(F)(F)C(F)(F)C(F)(F)C(F)(F)C(F)(F)C(F)(F)C(F)(F)C(F)(F)C(F)(F)C(F)(F)C(F)(F)C(F)(F)C(F)(F)C(F)(F)C(F)(F)C(F)(F)C(F)(F)C(F)(F)C(F)(F)C(F)(F)C(F)(F)C(F)(F)C(F)(F)C(F)(F)C(F)(F)C(F)(F)C(F)(F)C(F)(F)C(F)(F)C(F)(F)C(F)(F)C(F)(F)C(F)(F)C(F)(F)C(F)(F)C(F)(F)C(F)(F)C(F)(F)C(F)(F)C(F)(F)C(F)(F)C(F)(F)C(F)(F)C(F)(F)C(F)(F)C(F)(F)C(F)(F)C(F)(F)C(F)(F)C(F)(F)C(F)(F)C(F)(F)C(F)(F)C(F)(F)C(F)(F)C(F)(F)C(F)(F)C(F)(F)C(F)(F)C(F)(F)C(F)(F)C(F)(F)C(F)(F)C(F)(F)C(F)(F)C(F)(F)C(F)(F)C(F)(F)C(F)(F)C(F)(F)C(F)(F)C(F)(F)C(F)(F)C(F)(F)C(F)(F)C(F)(F)C(F)(F)C(F)(F)C(F)(F)C(F)(F)C(F)(F)C(F)(F)C(F)(F)C(F)(F)C(F)(F)C(F)(F)C(F)(F)C(F)(F)C(F)(F)C(F)(F)C(F)(F)C(F)(F)C(F)(F)C(F)(F)C(F)(F)C(F)(F)C(F)(F)C(F)(F)C(F)(F)C(F)(F)C(F)(F)C(F)(F)C(F)(F)C(F)(F)C(F)(F)C(F)(F)C(F)(F)C(F)(F)C(F)(F)C(F)(F)C(F)(F)C(F)(F)C(F)(F)C(F)(F)C(F)(F)C(F)(F)C(F)(F)C(F)(F)C(F)(F)C(F)(F)C(F)(F)C(F)(F)C(F)(F)C(F)(F)C(F)(F)C(F)(F)C(F)(F)C(F)(F)C(F)(F)C(F)(F)C(F)(F)C(F)(F)C(F)(F)C(F)(F)C(F)(F)C(F)(F)C(F)(F)C(F)(F)C(F)(F)C(F)(F)C(F)(F)C(F)(F)C(F)(F)C(F)(F)C(F)(F)C(F)(F)C(F)(F)C(F)(F)C(F)(F)C(F)(F)C(F)(F)C(F)(F)C(F)(F)C(F)(F)C(F)(F)C(F)(F)C(F)(F)C(F)(F)C(F)(F)C(F)(F)C(F)(F)C(F)(F)C(F)(F)C(F)(F)C(F)(F)C(F)(F)C(F)(F)C(F)(F)C(F)(F)C(F)(F)C(F)(F)C(F)(F)C(F)(F)C(F)(F)C(F)(F)C(F)(F)C(F)(F)C(F)(F)C(F)(F)C(F)(F)C(F)(F)C(F)(F)C(F)(F)C(F)(F)C(F)(F)C(F)(F)C(F)(F)C(F)(F)C(F)(F)C(F)(F)C(F)(F)C(F)(F)C(F)(F)C(F)(F)C(F)(F)C(F)(F)C(F)(F)C(F)(F)C(F)(F)C(F)(F)C(F)(F)C(F)(F)C(F)(F)C(F)(F)C(F)(F)C(F)(F)C(F)(F)C(F)(F)C(F)(F)C(F)(F)C(F)(F)C(F)(F)C(F)(F)C(F)(F)C(F)(F)C(F)(F)C(F)(F)C(F)(F)C(F)(F)C(F)(F)C(F)(F)C(F)(F)C(F)(F)C(F)(F)C(F)(F)C(F)(F)C(F)(F)C(F)(F)C(F)(F)C(F)(F)C(F)(F)C(F)(F)C(F)(F)C(F)(F)C(F)(F)C(F)(F)C(F)(F)C(F)(F)C(F)(F)C(F)(F)C(F)(F)C(F)(F)C(F)(F)C(F)(F)C(F)(F)C(F)(F)C(F)(F)C(F)(F)C(F)(F)C(F)(F)C(F)(F)C(F)(F)C(F)(F)C(F)(F)C(F)(F)C(F)(F)C(F)(F)C(F)(F)C(F)(F)C(F)(F)C(F)(F)C(F)(F)C(F)(F)C(F)(F)C(F)(F)C(F)(F)C(F)(F)C(F)(F)C(F)(F)C(F)(F)C(F)(F)C(F)(F)C(F)(F)C(F)(F)C(F)(F)C(F)(F)C(F)(F)C(F)(F)C(F)(F)C(F)(F)C(F)(F)C(F)(F)C(F)(F)C(F)(F)C(F)(F)C(F)(F)C(F)(F)C(F)(F)C(F)(F)C(F)(F)C(F)(F)C(F)(F)C(F)(F)C(F)(F)C(F)(F)C(F)(F)C(F)(F)C(F)(F)C(F)(F)C(F)(F)C(F)(F)C(F)(F)C(F)(F)C(F)(F)C(F)(F)C(F)(F)C(F)(F)C(F)(F)C(F)(F)C(F)(F)C(F)(F)C(F)(F)C(F)(F)C(F)(F)C(F)(F)C(F)(F)C(F)(F)C(F)(F)C(F)(F)C(F)(F)C(F)(F)C(F)(F)C(F)(F)C(F)(F)C(F)(F)C(F)(F)C(F)(F)C(F)(F)C(F)(F)C(F)(F)C(F)(F)C(F)(F)C(F)(F)C(F)(F)C(F)(F)C(F)(F)C(F)(F)C(F)(F)C(F)(F)C(F)(F)C(F)(F)C(F)(F)C(F)(F)C(F)(F)C(F)(F)C(F)(F)C(F)(F)C(F)(F)C(F)(F)C(F)(F)C(F)(F)C(F)(F)C(F)(F)C(F)(F)C(F)(F)C(F)(F)C(F)(F)C(F)(F)C(F)(F)C(F)(F)C(F)(F)C(F)(F)C(F)(F)C(F)(F)C(F)(F)C(F)(F)C(F)(F)C(F)(F)C(F)(F)C(F)(F)C(F)(F)C(F)(F)C(F)(F)C(F)(F)C(F)(F)C(F |        |  |       |      |   |  |     |



[illegible]



|         |                                                                               |              |                                                                                                                                                                                                                                                                                                                                                                                                                                                                                                                                                                                                                                                                                                                                                                                                                                                                                                                                                                                                                                                                                                                                                                                                                                                                                                                                                                                                                                                                                                                                                                                                                                                                                                                                                                                                                                                                                                                                                                                                                                                                                                                                                                                                                                                                                                                                                                                                                                                                                                                                                                                                                                                                                                                                                                                                                                                                                                                                                                                                                                                                                                                                                                                                                                                                                                                                                                                                                                                                                                                                                                                                                                                                                                                                                                                                                                                                                                                                                                                                                                                                                                                                                                                                                                                                                                                                                                                                                                                                                                                                                                                                                                                                                                                                                                                                                                                                                                                                                                                                                                                                                                                                                                                                                                                                                                                                                                                                                               |        |       |      |   |     |
|---------|-------------------------------------------------------------------------------|--------------|-------------------------------------------------------------------------------------------------------------------------------------------------------------------------------------------------------------------------------------------------------------------------------------------------------------------------------------------------------------------------------------------------------------------------------------------------------------------------------------------------------------------------------------------------------------------------------------------------------------------------------------------------------------------------------------------------------------------------------------------------------------------------------------------------------------------------------------------------------------------------------------------------------------------------------------------------------------------------------------------------------------------------------------------------------------------------------------------------------------------------------------------------------------------------------------------------------------------------------------------------------------------------------------------------------------------------------------------------------------------------------------------------------------------------------------------------------------------------------------------------------------------------------------------------------------------------------------------------------------------------------------------------------------------------------------------------------------------------------------------------------------------------------------------------------------------------------------------------------------------------------------------------------------------------------------------------------------------------------------------------------------------------------------------------------------------------------------------------------------------------------------------------------------------------------------------------------------------------------------------------------------------------------------------------------------------------------------------------------------------------------------------------------------------------------------------------------------------------------------------------------------------------------------------------------------------------------------------------------------------------------------------------------------------------------------------------------------------------------------------------------------------------------------------------------------------------------------------------------------------------------------------------------------------------------------------------------------------------------------------------------------------------------------------------------------------------------------------------------------------------------------------------------------------------------------------------------------------------------------------------------------------------------------------------------------------------------------------------------------------------------------------------------------------------------------------------------------------------------------------------------------------------------------------------------------------------------------------------------------------------------------------------------------------------------------------------------------------------------------------------------------------------------------------------------------------------------------------------------------------------------------------------------------------------------------------------------------------------------------------------------------------------------------------------------------------------------------------------------------------------------------------------------------------------------------------------------------------------------------------------------------------------------------------------------------------------------------------------------------------------------------------------------------------------------------------------------------------------------------------------------------------------------------------------------------------------------------------------------------------------------------------------------------------------------------------------------------------------------------------------------------------------------------------------------------------------------------------------------------------------------------------------------------------------------------------------------------------------------------------------------------------------------------------------------------------------------------------------------------------------------------------------------------------------------------------------------------------------------------------------------------------------------------------------------------------------------------------------------------------------------------------------------------------------------|--------|-------|------|---|-----|
| QLO1767 | Methyl perfluoroheptanoate                                                    | 14312-89-1   | COC(=O)C(F)C(F)C(F)C(F)C(F)C(F)C(F)F                                                                                                                                                                                                                                                                                                                                                                                                                                                                                                                                                                                                                                                                                                                                                                                                                                                                                                                                                                                                                                                                                                                                                                                                                                                                                                                                                                                                                                                                                                                                                                                                                                                                                                                                                                                                                                                                                                                                                                                                                                                                                                                                                                                                                                                                                                                                                                                                                                                                                                                                                                                                                                                                                                                                                                                                                                                                                                                                                                                                                                                                                                                                                                                                                                                                                                                                                                                                                                                                                                                                                                                                                                                                                                                                                                                                                                                                                                                                                                                                                                                                                                                                                                                                                                                                                                                                                                                                                                                                                                                                                                                                                                                                                                                                                                                                                                                                                                                                                                                                                                                                                                                                                                                                                                                                                                                                                                                          | -8.66  | 50.00 | 5.62 | P | IN  |
| QLO1768 | Methyl perfluorohexanoate                                                     | 424-18-0     | COC(=O)C(F)C(F)C(F)C(F)C(F)C(F)F                                                                                                                                                                                                                                                                                                                                                                                                                                                                                                                                                                                                                                                                                                                                                                                                                                                                                                                                                                                                                                                                                                                                                                                                                                                                                                                                                                                                                                                                                                                                                                                                                                                                                                                                                                                                                                                                                                                                                                                                                                                                                                                                                                                                                                                                                                                                                                                                                                                                                                                                                                                                                                                                                                                                                                                                                                                                                                                                                                                                                                                                                                                                                                                                                                                                                                                                                                                                                                                                                                                                                                                                                                                                                                                                                                                                                                                                                                                                                                                                                                                                                                                                                                                                                                                                                                                                                                                                                                                                                                                                                                                                                                                                                                                                                                                                                                                                                                                                                                                                                                                                                                                                                                                                                                                                                                                                                                                              | -8.03  | 47.83 | 5.35 | P | IN  |
| QLO1769 | Methyl nonafluorovalerate                                                     | 13038-26-1   | COC(=O)C(F)C(F)C(F)C(F)C(F)C(F)F                                                                                                                                                                                                                                                                                                                                                                                                                                                                                                                                                                                                                                                                                                                                                                                                                                                                                                                                                                                                                                                                                                                                                                                                                                                                                                                                                                                                                                                                                                                                                                                                                                                                                                                                                                                                                                                                                                                                                                                                                                                                                                                                                                                                                                                                                                                                                                                                                                                                                                                                                                                                                                                                                                                                                                                                                                                                                                                                                                                                                                                                                                                                                                                                                                                                                                                                                                                                                                                                                                                                                                                                                                                                                                                                                                                                                                                                                                                                                                                                                                                                                                                                                                                                                                                                                                                                                                                                                                                                                                                                                                                                                                                                                                                                                                                                                                                                                                                                                                                                                                                                                                                                                                                                                                                                                                                                                                                              | -7.30  | 45.00 | 5.04 | P | IN  |
| QLO1770 | Methyl heptafluorobutyrate                                                    | 356-24-1     | COC(=O)C(F)C(F)C(F)C(F)F                                                                                                                                                                                                                                                                                                                                                                                                                                                                                                                                                                                                                                                                                                                                                                                                                                                                                                                                                                                                                                                                                                                                                                                                                                                                                                                                                                                                                                                                                                                                                                                                                                                                                                                                                                                                                                                                                                                                                                                                                                                                                                                                                                                                                                                                                                                                                                                                                                                                                                                                                                                                                                                                                                                                                                                                                                                                                                                                                                                                                                                                                                                                                                                                                                                                                                                                                                                                                                                                                                                                                                                                                                                                                                                                                                                                                                                                                                                                                                                                                                                                                                                                                                                                                                                                                                                                                                                                                                                                                                                                                                                                                                                                                                                                                                                                                                                                                                                                                                                                                                                                                                                                                                                                                                                                                                                                                                                                      | -6.43  | 41.18 | 4.66 | P | IN  |
| QLO1771 | Methyl 4-trifluoroethenoxy-2,2,3,3,4,4-hexafluorobutanoate                    | 19190-61-5   | COC(=O)C(F)C(F)C(F)C(F)C(F)OC(F)=C(F)F                                                                                                                                                                                                                                                                                                                                                                                                                                                                                                                                                                                                                                                                                                                                                                                                                                                                                                                                                                                                                                                                                                                                                                                                                                                                                                                                                                                                                                                                                                                                                                                                                                                                                                                                                                                                                                                                                                                                                                                                                                                                                                                                                                                                                                                                                                                                                                                                                                                                                                                                                                                                                                                                                                                                                                                                                                                                                                                                                                                                                                                                                                                                                                                                                                                                                                                                                                                                                                                                                                                                                                                                                                                                                                                                                                                                                                                                                                                                                                                                                                                                                                                                                                                                                                                                                                                                                                                                                                                                                                                                                                                                                                                                                                                                                                                                                                                                                                                                                                                                                                                                                                                                                                                                                                                                                                                                                                                        | -7.68  | 40.91 | 5.25 | P | IN  |
| QLO1772 | Methyl 3-chloroperfluoropropanoate                                            | 127589-63-3  | COC(=O)C(F)C(F)C(F)Cl                                                                                                                                                                                                                                                                                                                                                                                                                                                                                                                                                                                                                                                                                                                                                                                                                                                                                                                                                                                                                                                                                                                                                                                                                                                                                                                                                                                                                                                                                                                                                                                                                                                                                                                                                                                                                                                                                                                                                                                                                                                                                                                                                                                                                                                                                                                                                                                                                                                                                                                                                                                                                                                                                                                                                                                                                                                                                                                                                                                                                                                                                                                                                                                                                                                                                                                                                                                                                                                                                                                                                                                                                                                                                                                                                                                                                                                                                                                                                                                                                                                                                                                                                                                                                                                                                                                                                                                                                                                                                                                                                                                                                                                                                                                                                                                                                                                                                                                                                                                                                                                                                                                                                                                                                                                                                                                                                                                                         | -5.33  | 35.71 | 4.20 | P | IN  |
| QLO1773 | Methyl pentafluoropropionate                                                  | 378-75-6     | COC(=O)C(F)C(F)C(F)F                                                                                                                                                                                                                                                                                                                                                                                                                                                                                                                                                                                                                                                                                                                                                                                                                                                                                                                                                                                                                                                                                                                                                                                                                                                                                                                                                                                                                                                                                                                                                                                                                                                                                                                                                                                                                                                                                                                                                                                                                                                                                                                                                                                                                                                                                                                                                                                                                                                                                                                                                                                                                                                                                                                                                                                                                                                                                                                                                                                                                                                                                                                                                                                                                                                                                                                                                                                                                                                                                                                                                                                                                                                                                                                                                                                                                                                                                                                                                                                                                                                                                                                                                                                                                                                                                                                                                                                                                                                                                                                                                                                                                                                                                                                                                                                                                                                                                                                                                                                                                                                                                                                                                                                                                                                                                                                                                                                                          | -5.33  | 35.71 | 4.20 | P | IN  |
| QLO1774 | Methyl 2,2,3,3-tetrafluoro-3-[(1,1,1,2,3,3,3-heptafluoropropyl)oxy]propanoate | 51502-43-3   | COC(=O)C(F)C(F)C(F)C(F)OC(F)C(F)C(F)C(F)F                                                                                                                                                                                                                                                                                                                                                                                                                                                                                                                                                                                                                                                                                                                                                                                                                                                                                                                                                                                                                                                                                                                                                                                                                                                                                                                                                                                                                                                                                                                                                                                                                                                                                                                                                                                                                                                                                                                                                                                                                                                                                                                                                                                                                                                                                                                                                                                                                                                                                                                                                                                                                                                                                                                                                                                                                                                                                                                                                                                                                                                                                                                                                                                                                                                                                                                                                                                                                                                                                                                                                                                                                                                                                                                                                                                                                                                                                                                                                                                                                                                                                                                                                                                                                                                                                                                                                                                                                                                                                                                                                                                                                                                                                                                                                                                                                                                                                                                                                                                                                                                                                                                                                                                                                                                                                                                                                                                     | -8.20  | 45.83 | 5.45 | P | IN  |
| QLO1775 | Methyl perfluoro(8-(fluoroformyl)-5-methyl-4,7-dioxanono-                     | 69116-73-0   | COC(=O)C(F)C(F)C(F)C(F)OC(F)C(F)C(F)OC(F)C(F)=O(C(F)F)F                                                                                                                                                                                                                                                                                                                                                                                                                                                                                                                                                                                                                                                                                                                                                                                                                                                                                                                                                                                                                                                                                                                                                                                                                                                                                                                                                                                                                                                                                                                                                                                                                                                                                                                                                                                                                                                                                                                                                                                                                                                                                                                                                                                                                                                                                                                                                                                                                                                                                                                                                                                                                                                                                                                                                                                                                                                                                                                                                                                                                                                                                                                                                                                                                                                                                                                                                                                                                                                                                                                                                                                                                                                                                                                                                                                                                                                                                                                                                                                                                                                                                                                                                                                                                                                                                                                                                                                                                                                                                                                                                                                                                                                                                                                                                                                                                                                                                                                                                                                                                                                                                                                                                                                                                                                                                                                                                                       | -9.68  | 45.45 | 6.14 | P | IN  |
| QLO1776 | Methyl perfluoro(3-[1-ethenoxypropan-2-yloxy]propanoate)                      | 63863-43-4   | COC(=O)C(F)C(F)C(F)C(F)OC(F)C(F)C(F)C(F)OC(F)=C(F)F                                                                                                                                                                                                                                                                                                                                                                                                                                                                                                                                                                                                                                                                                                                                                                                                                                                                                                                                                                                                                                                                                                                                                                                                                                                                                                                                                                                                                                                                                                                                                                                                                                                                                                                                                                                                                                                                                                                                                                                                                                                                                                                                                                                                                                                                                                                                                                                                                                                                                                                                                                                                                                                                                                                                                                                                                                                                                                                                                                                                                                                                                                                                                                                                                                                                                                                                                                                                                                                                                                                                                                                                                                                                                                                                                                                                                                                                                                                                                                                                                                                                                                                                                                                                                                                                                                                                                                                                                                                                                                                                                                                                                                                                                                                                                                                                                                                                                                                                                                                                                                                                                                                                                                                                                                                                                                                                                                           | -9.06  | 44.83 | 5.86 | P | IN  |
| QLO1777 | Perfluoromethoxypropionic acid methyl ester                                   | 356-69-4     | COC(=O)C(F)C(F)C(F)OC(F)F                                                                                                                                                                                                                                                                                                                                                                                                                                                                                                                                                                                                                                                                                                                                                                                                                                                                                                                                                                                                                                                                                                                                                                                                                                                                                                                                                                                                                                                                                                                                                                                                                                                                                                                                                                                                                                                                                                                                                                                                                                                                                                                                                                                                                                                                                                                                                                                                                                                                                                                                                                                                                                                                                                                                                                                                                                                                                                                                                                                                                                                                                                                                                                                                                                                                                                                                                                                                                                                                                                                                                                                                                                                                                                                                                                                                                                                                                                                                                                                                                                                                                                                                                                                                                                                                                                                                                                                                                                                                                                                                                                                                                                                                                                                                                                                                                                                                                                                                                                                                                                                                                                                                                                                                                                                                                                                                                                                                     | -6.66  | 38.89 | 4.80 | P | IN  |
| QLO1778 | Methyl perfluoro-3-[3-methoxypropoxy]-3H-propanoate                           | 958445-54-0  | COC(=O)C(F)C(F)C(F)OC(F)C(F)C(F)C(F)OC(F)F                                                                                                                                                                                                                                                                                                                                                                                                                                                                                                                                                                                                                                                                                                                                                                                                                                                                                                                                                                                                                                                                                                                                                                                                                                                                                                                                                                                                                                                                                                                                                                                                                                                                                                                                                                                                                                                                                                                                                                                                                                                                                                                                                                                                                                                                                                                                                                                                                                                                                                                                                                                                                                                                                                                                                                                                                                                                                                                                                                                                                                                                                                                                                                                                                                                                                                                                                                                                                                                                                                                                                                                                                                                                                                                                                                                                                                                                                                                                                                                                                                                                                                                                                                                                                                                                                                                                                                                                                                                                                                                                                                                                                                                                                                                                                                                                                                                                                                                                                                                                                                                                                                                                                                                                                                                                                                                                                                                    | -8.69  | 42.86 | 5.71 | P | IN  |
| QLO1779 | Methyl difluoro[1,1,2,2-tetrafluoro-2-(nonafluorobutoxy)etho                  | 129301-40-2  | COC(=O)C(F)C(F)OC(F)C(F)C(F)C(F)C(F)C(F)C(F)C(F)F                                                                                                                                                                                                                                                                                                                                                                                                                                                                                                                                                                                                                                                                                                                                                                                                                                                                                                                                                                                                                                                                                                                                                                                                                                                                                                                                                                                                                                                                                                                                                                                                                                                                                                                                                                                                                                                                                                                                                                                                                                                                                                                                                                                                                                                                                                                                                                                                                                                                                                                                                                                                                                                                                                                                                                                                                                                                                                                                                                                                                                                                                                                                                                                                                                                                                                                                                                                                                                                                                                                                                                                                                                                                                                                                                                                                                                                                                                                                                                                                                                                                                                                                                                                                                                                                                                                                                                                                                                                                                                                                                                                                                                                                                                                                                                                                                                                                                                                                                                                                                                                                                                                                                                                                                                                                                                                                                                             | -9.45  | 48.39 | 6.01 | P | IN  |
| QLO1780 | Methyl perfluoro-3,6,9-trioxatridecanoate                                     | 330562-42-0  | COC(=O)C(F)C(F)OC(F)C(F)C(F)C(F)C(F)C(F)C(F)C(F)C(F)F                                                                                                                                                                                                                                                                                                                                                                                                                                                                                                                                                                                                                                                                                                                                                                                                                                                                                                                                                                                                                                                                                                                                                                                                                                                                                                                                                                                                                                                                                                                                                                                                                                                                                                                                                                                                                                                                                                                                                                                                                                                                                                                                                                                                                                                                                                                                                                                                                                                                                                                                                                                                                                                                                                                                                                                                                                                                                                                                                                                                                                                                                                                                                                                                                                                                                                                                                                                                                                                                                                                                                                                                                                                                                                                                                                                                                                                                                                                                                                                                                                                                                                                                                                                                                                                                                                                                                                                                                                                                                                                                                                                                                                                                                                                                                                                                                                                                                                                                                                                                                                                                                                                                                                                                                                                                                                                                                                         | -10.42 | 50.00 | 6.45 | P | IN  |
| QLO1781 | Methyl difluoro[1,1,2,2-tetrafluoro-2-[1,1,2,2-tetrafluoro-2-(tr              | 169289-58-1  | COC(=O)C(F)C(F)OC(F)C(F)C(F)C(F)OC(F)C(F)C(F)OC(F)F                                                                                                                                                                                                                                                                                                                                                                                                                                                                                                                                                                                                                                                                                                                                                                                                                                                                                                                                                                                                                                                                                                                                                                                                                                                                                                                                                                                                                                                                                                                                                                                                                                                                                                                                                                                                                                                                                                                                                                                                                                                                                                                                                                                                                                                                                                                                                                                                                                                                                                                                                                                                                                                                                                                                                                                                                                                                                                                                                                                                                                                                                                                                                                                                                                                                                                                                                                                                                                                                                                                                                                                                                                                                                                                                                                                                                                                                                                                                                                                                                                                                                                                                                                                                                                                                                                                                                                                                                                                                                                                                                                                                                                                                                                                                                                                                                                                                                                                                                                                                                                                                                                                                                                                                                                                                                                                                                                           | -9.06  | 44.83 | 5.86 | P | IN  |
| QLO1782 | Methyl perfluoro-3,6-dioxahexanoate                                           | 39187-41-2   | COC(=O)C(F)C(F)OC(F)C(F)C(F)C(F)OC(F)F                                                                                                                                                                                                                                                                                                                                                                                                                                                                                                                                                                                                                                                                                                                                                                                                                                                                                                                                                                                                                                                                                                                                                                                                                                                                                                                                                                                                                                                                                                                                                                                                                                                                                                                                                                                                                                                                                                                                                                                                                                                                                                                                                                                                                                                                                                                                                                                                                                                                                                                                                                                                                                                                                                                                                                                                                                                                                                                                                                                                                                                                                                                                                                                                                                                                                                                                                                                                                                                                                                                                                                                                                                                                                                                                                                                                                                                                                                                                                                                                                                                                                                                                                                                                                                                                                                                                                                                                                                                                                                                                                                                                                                                                                                                                                                                                                                                                                                                                                                                                                                                                                                                                                                                                                                                                                                                                                                                        | -7.68  | 40.91 | 5.25 | P | IN  |
| QLO1783 | Methyl 2,3,3,3-tetrafluoro-2-[undecafluoropentyl]oxy]propar                   | 220369-95-9  | COC(=O)C(F)C(F)OC(F)C(F)C(F)C(F)C(F)C(F)C(F)C(F)F                                                                                                                                                                                                                                                                                                                                                                                                                                                                                                                                                                                                                                                                                                                                                                                                                                                                                                                                                                                                                                                                                                                                                                                                                                                                                                                                                                                                                                                                                                                                                                                                                                                                                                                                                                                                                                                                                                                                                                                                                                                                                                                                                                                                                                                                                                                                                                                                                                                                                                                                                                                                                                                                                                                                                                                                                                                                                                                                                                                                                                                                                                                                                                                                                                                                                                                                                                                                                                                                                                                                                                                                                                                                                                                                                                                                                                                                                                                                                                                                                                                                                                                                                                                                                                                                                                                                                                                                                                                                                                                                                                                                                                                                                                                                                                                                                                                                                                                                                                                                                                                                                                                                                                                                                                                                                                                                                                             | -9.33  | 50.00 | 5.94 | P | IN  |
| QLO1784 | Methyl perfluoro(2-propoxypropanoate)                                         | 13140-34-6   | COC(=O)C(F)C(F)C(F)C(F)C(F)C(F)F                                                                                                                                                                                                                                                                                                                                                                                                                                                                                                                                                                                                                                                                                                                                                                                                                                                                                                                                                                                                                                                                                                                                                                                                                                                                                                                                                                                                                                                                                                                                                                                                                                                                                                                                                                                                                                                                                                                                                                                                                                                                                                                                                                                                                                                                                                                                                                                                                                                                                                                                                                                                                                                                                                                                                                                                                                                                                                                                                                                                                                                                                                                                                                                                                                                                                                                                                                                                                                                                                                                                                                                                                                                                                                                                                                                                                                                                                                                                                                                                                                                                                                                                                                                                                                                                                                                                                                                                                                                                                                                                                                                                                                                                                                                                                                                                                                                                                                                                                                                                                                                                                                                                                                                                                                                                                                                                                                                              | -8.20  | 45.83 | 5.45 | P | IN  |
| QLO1785 | Methyl 2,3,3,3-tetrafluoro-2-(pentafluoroethoxy)propanoate                    | 117516-09-3  | COC(=O)C(F)C(F)C(F)C(F)C(F)F                                                                                                                                                                                                                                                                                                                                                                                                                                                                                                                                                                                                                                                                                                                                                                                                                                                                                                                                                                                                                                                                                                                                                                                                                                                                                                                                                                                                                                                                                                                                                                                                                                                                                                                                                                                                                                                                                                                                                                                                                                                                                                                                                                                                                                                                                                                                                                                                                                                                                                                                                                                                                                                                                                                                                                                                                                                                                                                                                                                                                                                                                                                                                                                                                                                                                                                                                                                                                                                                                                                                                                                                                                                                                                                                                                                                                                                                                                                                                                                                                                                                                                                                                                                                                                                                                                                                                                                                                                                                                                                                                                                                                                                                                                                                                                                                                                                                                                                                                                                                                                                                                                                                                                                                                                                                                                                                                                                                  | -7.49  | 42.86 | 5.15 | P | IN  |
| QLO1786 | Methyl 2,3,3,3-tetrafluoro-2-[1,1,2,3,3,3-hexafluoro-2-(hepta                 | 26131-32-8   | COC(=O)C(F)C(F)C(F)C(F)C(F)C(F)C(F)C(F)C(F)C(F)F                                                                                                                                                                                                                                                                                                                                                                                                                                                                                                                                                                                                                                                                                                                                                                                                                                                                                                                                                                                                                                                                                                                                                                                                                                                                                                                                                                                                                                                                                                                                                                                                                                                                                                                                                                                                                                                                                                                                                                                                                                                                                                                                                                                                                                                                                                                                                                                                                                                                                                                                                                                                                                                                                                                                                                                                                                                                                                                                                                                                                                                                                                                                                                                                                                                                                                                                                                                                                                                                                                                                                                                                                                                                                                                                                                                                                                                                                                                                                                                                                                                                                                                                                                                                                                                                                                                                                                                                                                                                                                                                                                                                                                                                                                                                                                                                                                                                                                                                                                                                                                                                                                                                                                                                                                                                                                                                                                              | -9.91  | 50.00 | 6.21 | P | IN  |
| QLO1787 | Methylperfluoro-2,5,8-trimethyl-3,6,9-trioxadodecanoic acid                   | 39187-47-8   | COC(=O)C(F)C(F)C(F)C(F)C(F)C(F)C(F)C(F)C(F)C(F)C(F)F                                                                                                                                                                                                                                                                                                                                                                                                                                                                                                                                                                                                                                                                                                                                                                                                                                                                                                                                                                                                                                                                                                                                                                                                                                                                                                                                                                                                                                                                                                                                                                                                                                                                                                                                                                                                                                                                                                                                                                                                                                                                                                                                                                                                                                                                                                                                                                                                                                                                                                                                                                                                                                                                                                                                                                                                                                                                                                                                                                                                                                                                                                                                                                                                                                                                                                                                                                                                                                                                                                                                                                                                                                                                                                                                                                                                                                                                                                                                                                                                                                                                                                                                                                                                                                                                                                                                                                                                                                                                                                                                                                                                                                                                                                                                                                                                                                                                                                                                                                                                                                                                                                                                                                                                                                                                                                                                                                          | -11.13 | 52.27 | 6.76 | P | OUT |
| QLO1788 | Perfluorotetramethyltetraoxapentadecanoicacidme                               | 133609-46-8  | COC(=O)C(F)C(F)C(F)C(F)C(F)C(F)C(F)C(F)C(F)C(F)C(F)C(F)C(F)C(F)F                                                                                                                                                                                                                                                                                                                                                                                                                                                                                                                                                                                                                                                                                                                                                                                                                                                                                                                                                                                                                                                                                                                                                                                                                                                                                                                                                                                                                                                                                                                                                                                                                                                                                                                                                                                                                                                                                                                                                                                                                                                                                                                                                                                                                                                                                                                                                                                                                                                                                                                                                                                                                                                                                                                                                                                                                                                                                                                                                                                                                                                                                                                                                                                                                                                                                                                                                                                                                                                                                                                                                                                                                                                                                                                                                                                                                                                                                                                                                                                                                                                                                                                                                                                                                                                                                                                                                                                                                                                                                                                                                                                                                                                                                                                                                                                                                                                                                                                                                                                                                                                                                                                                                                                                                                                                                                                                                              | -12.08 | 53.70 | 7.19 | P | OUT |
| QLO1789 | Methyl 2,4,4,5,7,7,8,10,10,11,13,13,14,16,16,17,17,18,18-i                    | 1005033-64-6 | COC(=O)C(F)C(F)C(F)C(F)C(F)C(F)C(F)C(F)C(F)C(F)C(F)C(F)C(F)F                                                                                                                                                                                                                                                                                                                                                                                                                                                                                                                                                                                                                                                                                                                                                                                                                                                                                                                                                                                                                                                                                                                                                                                                                                                                                                                                                                                                                                                                                                                                                                                                                                                                                                                                                                                                                                                                                                                                                                                                                                                                                                                                                                                                                                                                                                                                                                                                                                                                                                                                                                                                                                                                                                                                                                                                                                                                                                                                                                                                                                                                                                                                                                                                                                                                                                                                                                                                                                                                                                                                                                                                                                                                                                                                                                                                                                                                                                                                                                                                                                                                                                                                                                                                                                                                                                                                                                                                                                                                                                                                                                                                                                                                                                                                                                                                                                                                                                                                                                                                                                                                                                                                                                                                                                                                                                                                                                  | -12.86 | 54.69 | 7.55 | P | OUT |
| QLO1790 | Methyl 2,3,4,4,5,5,6,6,6-nonafluorohex-2-enoate                               | 88022-46-2   | COC(=O)C(F)=C(F)C(F)C(F)C(F)C(F)F                                                                                                                                                                                                                                                                                                                                                                                                                                                                                                                                                                                                                                                                                                                                                                                                                                                                                                                                                                                                                                                                                                                                                                                                                                                                                                                                                                                                                                                                                                                                                                                                                                                                                                                                                                                                                                                                                                                                                                                                                                                                                                                                                                                                                                                                                                                                                                                                                                                                                                                                                                                                                                                                                                                                                                                                                                                                                                                                                                                                                                                                                                                                                                                                                                                                                                                                                                                                                                                                                                                                                                                                                                                                                                                                                                                                                                                                                                                                                                                                                                                                                                                                                                                                                                                                                                                                                                                                                                                                                                                                                                                                                                                                                                                                                                                                                                                                                                                                                                                                                                                                                                                                                                                                                                                                                                                                                                                             | -7.49  | 42.86 | 5.15 | P | IN  |
| QLO1791 | Methyl 1,3-amino-4,4,5,5,6,6,6-heptafluorohex-2-enoate                        | 106203-17-2  | COC(=O)C=C(N)C(F)C(F)C(F)C(F)F                                                                                                                                                                                                                                                                                                                                                                                                                                                                                                                                                                                                                                                                                                                                                                                                                                                                                                                                                                                                                                                                                                                                                                                                                                                                                                                                                                                                                                                                                                                                                                                                                                                                                                                                                                                                                                                                                                                                                                                                                                                                                                                                                                                                                                                                                                                                                                                                                                                                                                                                                                                                                                                                                                                                                                                                                                                                                                                                                                                                                                                                                                                                                                                                                                                                                                                                                                                                                                                                                                                                                                                                                                                                                                                                                                                                                                                                                                                                                                                                                                                                                                                                                                                                                                                                                                                                                                                                                                                                                                                                                                                                                                                                                                                                                                                                                                                                                                                                                                                                                                                                                                                                                                                                                                                                                                                                                                                                | -7.00  | 30.43 | 5.04 | P | OUT |
| QLO1792 | Methyl 4,4,5,5,6,6,6-heptafluorohex-2-enoate                                  | 813-06-9     | COC(=O)C=C(C)C(F)C(F)C(F)C(F)F                                                                                                                                                                                                                                                                                                                                                                                                                                                                                                                                                                                                                                                                                                                                                                                                                                                                                                                                                                                                                                                                                                                                                                                                                                                                                                                                                                                                                                                                                                                                                                                                                                                                                                                                                                                                                                                                                                                                                                                                                                                                                                                                                                                                                                                                                                                                                                                                                                                                                                                                                                                                                                                                                                                                                                                                                                                                                                                                                                                                                                                                                                                                                                                                                                                                                                                                                                                                                                                                                                                                                                                                                                                                                                                                                                                                                                                                                                                                                                                                                                                                                                                                                                                                                                                                                                                                                                                                                                                                                                                                                                                                                                                                                                                                                                                                                                                                                                                                                                                                                                                                                                                                                                                                                                                                                                                                                                                                | -6.81  | 33.33 | 4.92 | P | IN  |
| QLO1793 | Methyl 3-(heptafluorooctyl)benzoate                                           | 80791-111-3  | COC(=O)C1=CC=C(C=C1)C(F)C(F)C(F)C(F)C(F)C(F)C(F)C(F)F                                                                                                                                                                                                                                                                                                                                                                                                                                                                                                                                                                                                                                                                                                                                                                                                                                                                                                                                                                                                                                                                                                                                                                                                                                                                                                                                                                                                                                                                                                                                                                                                                                                                                                                                                                                                                                                                                                                                                                                                                                                                                                                                                                                                                                                                                                                                                                                                                                                                                                                                                                                                                                                                                                                                                                                                                                                                                                                                                                                                                                                                                                                                                                                                                                                                                                                                                                                                                                                                                                                                                                                                                                                                                                                                                                                                                                                                                                                                                                                                                                                                                                                                                                                                                                                                                                                                                                                                                                                                                                                                                                                                                                                                                                                                                                                                                                                                                                                                                                                                                                                                                                                                                                                                                                                                                                                                                                         | -10.96 | 40.48 | 6.79 | P | IN  |
| QLO1794 | Methyl 4-(heptafluorooctyl)benzoate                                           | 80791-12-4   | COC(=O)C1=CC=C(C=C1)C(F)C(F)C(F)C(F)C(F)C(F)C(F)C(F)F                                                                                                                                                                                                                                                                                                                                                                                                                                                                                                                                                                                                                                                                                                                                                                                                                                                                                                                                                                                                                                                                                                                                                                                                                                                                                                                                                                                                                                                                                                                                                                                                                                                                                                                                                                                                                                                                                                                                                                                                                                                                                                                                                                                                                                                                                                                                                                                                                                                                                                                                                                                                                                                                                                                                                                                                                                                                                                                                                                                                                                                                                                                                                                                                                                                                                                                                                                                                                                                                                                                                                                                                                                                                                                                                                                                                                                                                                                                                                                                                                                                                                                                                                                                                                                                                                                                                                                                                                                                                                                                                                                                                                                                                                                                                                                                                                                                                                                                                                                                                                                                                                                                                                                                                                                                                                                                                                                         | -10.96 | 40.48 | 6.79 | P | OUT |
| QLO1795 | Methyl 4-(nonafluorobutyl)benzoate                                            | 88951-00-2   | COC(=O)C1=CC=C(C=C1)C(F)C(F)C(F)C(F)F                                                                                                                                                                                                                                                                                                                                                                                                                                                                                                                                                                                                                                                                                                                                                                                                                                                                                                                                                                                                                                                                                                                                                                                                                                                                                                                                                                                                                                                                                                                                                                                                                                                                                                                                                                                                                                                                                                                                                                                                                                                                                                                                                                                                                                                                                                                                                                                                                                                                                                                                                                                                                                                                                                                                                                                                                                                                                                                                                                                                                                                                                                                                                                                                                                                                                                                                                                                                                                                                                                                                                                                                                                                                                                                                                                                                                                                                                                                                                                                                                                                                                                                                                                                                                                                                                                                                                                                                                                                                                                                                                                                                                                                                                                                                                                                                                                                                                                                                                                                                                                                                                                                                                                                                                                                                                                                                                                                         | -9.18  | 30.00 | 6.06 | P | OUT |
| QLO1796 | Methyl 4-(heptafluoropropyl)benzoate                                          | 64299-47-4   | COC(=O)C1=CC=C(C=C1)C(F)C(F)C(F)C(F)F                                                                                                                                                                                                                                                                                                                                                                                                                                                                                                                                                                                                                                                                                                                                                                                                                                                                                                                                                                                                                                                                                                                                                                                                                                                                                                                                                                                                                                                                                                                                                                                                                                                                                                                                                                                                                                                                                                                                                                                                                                                                                                                                                                                                                                                                                                                                                                                                                                                                                                                                                                                                                                                                                                                                                                                                                                                                                                                                                                                                                                                                                                                                                                                                                                                                                                                                                                                                                                                                                                                                                                                                                                                                                                                                                                                                                                                                                                                                                                                                                                                                                                                                                                                                                                                                                                                                                                                                                                                                                                                                                                                                                                                                                                                                                                                                                                                                                                                                                                                                                                                                                                                                                                                                                                                                                                                                                                                         | -8.57  | 25.93 | 5.82 | P | OUT |
| QLO1797 | Methyl 5-(heptafluoropropyl)furan-2-carboxylate                               | 104939-25-5  | COC(=O)C1=CC=C(C=C1)C(F)C(F)C(F)F                                                                                                                                                                                                                                                                                                                                                                                                                                                                                                                                                                                                                                                                                                                                                                                                                                                                                                                                                                                                                                                                                                                                                                                                                                                                                                                                                                                                                                                                                                                                                                                                                                                                                                                                                                                                                                                                                                                                                                                                                                                                                                                                                                                                                                                                                                                                                                                                                                                                                                                                                                                                                                                                                                                                                                                                                                                                                                                                                                                                                                                                                                                                                                                                                                                                                                                                                                                                                                                                                                                                                                                                                                                                                                                                                                                                                                                                                                                                                                                                                                                                                                                                                                                                                                                                                                                                                                                                                                                                                                                                                                                                                                                                                                                                                                                                                                                                                                                                                                                                                                                                                                                                                                                                                                                                                                                                                                                             | -8.38  | 29.17 | 5.69 | P | OUT |
| QLO1798 | Methyl 2-(heptafluoropropyl)-6-methoxybenzoate                                | 109296-89-1  | COC(=O)c1c(O)cccc1C(F)C(F)C(F)C(F)F                                                                                                                                                                                                                                                                                                                                                                                                                                                                                                                                                                                                                                                                                                                                                                                                                                                                                                                                                                                                                                                                                                                                                                                                                                                                                                                                                                                                                                                                                                                                                                                                                                                                                                                                                                                                                                                                                                                                                                                                                                                                                                                                                                                                                                                                                                                                                                                                                                                                                                                                                                                                                                                                                                                                                                                                                                                                                                                                                                                                                                                                                                                                                                                                                                                                                                                                                                                                                                                                                                                                                                                                                                                                                                                                                                                                                                                                                                                                                                                                                                                                                                                                                                                                                                                                                                                                                                                                                                                                                                                                                                                                                                                                                                                                                                                                                                                                                                                                                                                                                                                                                                                                                                                                                                                                                                                                                                                           | -8.96  | 22.58 | 6.03 | P | OUT |
| QLO1799 | Methyl 2-methoxy-6-[(1,1,2,2,3,3,4,4,4-nonafluorobutane-1-s                   | 475630-76-3  | COC(=O)c1c(O)cccc1OS(=O)=O(C)C(F)C(F)C(F)C(F)C(F)F                                                                                                                                                                                                                                                                                                                                                                                                                                                                                                                                                                                                                                                                                                                                                                                                                                                                                                                                                                                                                                                                                                                                                                                                                                                                                                                                                                                                                                                                                                                                                                                                                                                                                                                                                                                                                                                                                                                                                                                                                                                                                                                                                                                                                                                                                                                                                                                                                                                                                                                                                                                                                                                                                                                                                                                                                                                                                                                                                                                                                                                                                                                                                                                                                                                                                                                                                                                                                                                                                                                                                                                                                                                                                                                                                                                                                                                                                                                                                                                                                                                                                                                                                                                                                                                                                                                                                                                                                                                                                                                                                                                                                                                                                                                                                                                                                                                                                                                                                                                                                                                                                                                                                                                                                                                                                                                                                                            | -10.02 | 23.68 | 6.52 | P | OUT |
| QLO1800 | Methyl 3,4,5-tris[1,1,2-trifluoro-2-(heptafluoropropoxy)ethox                 | 1233312-86-1 | COC(=O)c1cc(O)C(F)C(F)C(F)C(F)C(F)C(F)C(F)C(F)C(F)C(F)C(F)C(F)C(F)C(F)C(F)C(F)C(F)C(F)C(F)C(F)C(F)C(F)C(F)C(F)C(F)C(F)C(F)C(F)C(F)C(F)C(F)C(F)C(F)C(F)C(F)C(F)C(F)C(F)C(F)C(F)C(F)C(F)C(F)C(F)C(F)C(F)C(F)C(F)C(F)C(F)C(F)C(F)C(F)C(F)C(F)C(F)C(F)C(F)C(F)C(F)C(F)C(F)C(F)C(F)C(F)C(F)C(F)C(F)C(F)C(F)C(F)C(F)C(F)C(F)C(F)C(F)C(F)C(F)C(F)C(F)C(F)C(F)C(F)C(F)C(F)C(F)C(F)C(F)C(F)C(F)C(F)C(F)C(F)C(F)C(F)C(F)C(F)C(F)C(F)C(F)C(F)C(F)C(F)C(F)C(F)C(F)C(F)C(F)C(F)C(F)C(F)C(F)C(F)C(F)C(F)C(F)C(F)C(F)C(F)C(F)C(F)C(F)C(F)C(F)C(F)C(F)C(F)C(F)C(F)C(F)C(F)C(F)C(F)C(F)C(F)C(F)C(F)C(F)C(F)C(F)C(F)C(F)C(F)C(F)C(F)C(F)C(F)C(F)C(F)C(F)C(F)C(F)C(F)C(F)C(F)C(F)C(F)C(F)C(F)C(F)C(F)C(F)C(F)C(F)C(F)C(F)C(F)C(F)C(F)C(F)C(F)C(F)C(F)C(F)C(F)C(F)C(F)C(F)C(F)C(F)C(F)C(F)C(F)C(F)C(F)C(F)C(F)C(F)C(F)C(F)C(F)C(F)C(F)C(F)C(F)C(F)C(F)C(F)C(F)C(F)C(F)C(F)C(F)C(F)C(F)C(F)C(F)C(F)C(F)C(F)C(F)C(F)C(F)C(F)C(F)C(F)C(F)C(F)C(F)C(F)C(F)C(F)C(F)C(F)C(F)C(F)C(F)C(F)C(F)C(F)C(F)C(F)C(F)C(F)C(F)C(F)C(F)C(F)C(F)C(F)C(F)C(F)C(F)C(F)C(F)C(F)C(F)C(F)C(F)C(F)C(F)C(F)C(F)C(F)C(F)C(F)C(F)C(F)C(F)C(F)C(F)C(F)C(F)C(F)C(F)C(F)C(F)C(F)C(F)C(F)C(F)C(F)C(F)C(F)C(F)C(F)C(F)C(F)C(F)C(F)C(F)C(F)C(F)C(F)C(F)C(F)C(F)C(F)C(F)C(F)C(F)C(F)C(F)C(F)C(F)C(F)C(F)C(F)C(F)C(F)C(F)C(F)C(F)C(F)C(F)C(F)C(F)C(F)C(F)C(F)C(F)C(F)C(F)C(F)C(F)C(F)C(F)C(F)C(F)C(F)C(F)C(F)C(F)C(F)C(F)C(F)C(F)C(F)C(F)C(F)C(F)C(F)C(F)C(F)C(F)C(F)C(F)C(F)C(F)C(F)C(F)C(F)C(F)C(F)C(F)C(F)C(F)C(F)C(F)C(F)C(F)C(F)C(F)C(F)C(F)C(F)C(F)C(F)C(F)C(F)C(F)C(F)C(F)C(F)C(F)C(F)C(F)C(F)C(F)C(F)C(F)C(F)C(F)C(F)C(F)C(F)C(F)C(F)C(F)C(F)C(F)C(F)C(F)C(F)C(F)C(F)C(F)C(F)C(F)C(F)C(F)C(F)C(F)C(F)C(F)C(F)C(F)C(F)C(F)C(F)C(F)C(F)C(F)C(F)C(F)C(F)C(F)C(F)C(F)C(F)C(F)C(F)C(F)C(F)C(F)C(F)C(F)C(F)C(F)C(F)C(F)C(F)C(F)C(F)C(F)C(F)C(F)C(F)C(F)C(F)C(F)C(F)C(F)C(F)C(F)C(F)C(F)C(F)C(F)C(F)C(F)C(F)C(F)C(F)C(F)C(F)C(F)C(F)C(F)C(F)C(F)C(F)C(F)C(F)C(F)C(F)C(F)C(F)C(F)C(F)C(F)C(F)C(F)C(F)C(F)C(F)C(F)C(F)C(F)C(F)C(F)C(F)C(F)C(F)C(F)C(F)C(F)C(F)C(F)C(F)C(F)C(F)C(F)C(F)C(F)C(F)C(F)C(F)C(F)C(F)C(F)C(F)C(F)C(F)C(F)C(F)C(F)C(F)C(F)C(F)C(F)C(F)C(F)C(F)C(F)C(F)C(F)C(F)C(F)C(F)C(F)C(F)C(F)C(F)C(F)C(F)C(F)C(F)C(F)C(F)C(F)C(F)C(F)C(F)C(F)C(F)C(F)C(F)C(F)C(F)C(F)C(F)C(F)C(F)C(F)C(F)C(F)C(F)C(F)C(F)C(F)C(F)C(F)C(F)C(F)C(F)C(F)C(F)C(F)C(F)C(F)C(F)C(F)C(F)C(F)C(F)C(F)C(F)C(F)C(F)C(F)C(F)C(F)C(F)C(F)C(F)C(F)C(F)C(F)C(F)C(F)C(F)C(F)C(F)C(F)C(F)C(F)C(F)C(F)C(F)C(F)C(F)C(F)C(F)C(F)C(F)C(F)C(F)C(F)C(F)C(F)C(F)C(F)C(F)C(F)C(F)C(F)C(F)C(F)C(F)C(F)C(F)C(F)C(F)C(F)C(F)C(F)C(F)C(F)C(F)C(F)C(F)C(F)C(F)C(F)C(F)C(F)C(F)C(F)C(F)C(F)C(F)C(F)C(F)C(F)C(F)C(F)C(F)C(F)C(F)C(F)C(F)C(F)C(F)C(F)C(F)C(F)C(F)C(F)C(F)C(F)C(F)C(F)C(F)C(F)C(F)C(F)C(F)C(F)C(F)C(F)C(F)C(F)C(F)C(F)C(F)C(F)C(F)C(F)C(F)C(F)C(F)C(F)C(F)C(F)C(F)C(F)C(F)C(F)C(F)C(F)C(F)C(F)C(F)C(F)C(F)C(F)C(F)C(F)C(F)C(F)C(F)C(F)C(F)C(F)C(F)C(F)C(F)C(F)C(F)C(F)C(F)C(F)C(F)C(F)C(F)C(F)C(F)C(F)C(F)C(F)C(F)C(F)C(F)C(F)C(F)C(F)C(F)C(F)C(F)C(F)C(F)C(F)C(F)C(F)C(F)C(F)C(F)C(F)C(F)C(F)C(F)C(F)C(F)C(F)C(F)C(F)C(F)C(F)C(F)C(F)C(F)C(F)C(F)C(F)C(F)C(F)C(F)C(F)C(F)C(F)C(F)C(F)C(F)C(F)C(F)C(F)C(F)C(F)C(F)C(F)C(F)C(F)C(F)C(F)C(F)C(F)C(F)C(F)C(F)C(F)C(F)C(F)C(F)C(F)C(F)C(F)C(F)C(F)C(F)C(F)C(F)C(F)C(F)C(F)C(F)C(F)C(F)C(F)C(F)C(F)C(F)C(F)C(F)C(F)C(F)C(F)C(F)C(F)C(F)C(F)C(F)C(F)C(F)C(F)C(F)C(F)C(F)C(F)C(F)C(F)C(F)C(F)C(F)C(F)C(F)C(F)C(F)C(F)C(F)C(F)C(F)C(F)C(F)C(F)C(F)C(F)C(F)C(F)C(F)C(F)C(F)C(F)C(F)C(F)C(F)C(F)C(F)C(F)C(F)C(F)C(F)C(F)C(F)C(F)C(F)C(F)C(F)C(F)C(F)C(F)C(F)C(F)C(F)C(F)C(F)C(F)C(F)C(F)C(F)C(F)C(F)C(F)C(F)C(F)C(F)C(F)C(F)C(F)C(F)C(F)C(F)C(F)C(F)C(F)C(F)C(F)C(F)C(F)C(F)C(F)C(F)C(F)C(F)C(F)C(F)C(F)C(F)C(F)C(F)C(F)C(F)C(F)C(F)C(F)C(F)C(F)C(F)C(F)C(F)C(F)C(F)C(F)C(F)C(F)C(F)C(F)C(F)C(F)C(F)C(F)C(F)C(F)C(F)C(F)C(F)C(F)C(F)C(F)C(F)C(F)C(F)C(F)C(F)C(F)C(F)C(F)C(F)C(F)C(F)C(F)C(F)C(F)C(F)C(F)C(F)C(F)C(F)C(F)C(F)C(F)C(F)C(F)C(F)C(F)C(F)C(F)C(F)C(F)C(F)C(F)C(F)C(F)C(F)C(F)C(F)C(F)C(F)C(F)C(F)C(F)C(F)C(F)C(F)C(F)C(F)C(F)C(F)C(F)C(F)C(F)C(F)C(F)C(F)C(F)C(F)C(F)C(F)C(F)C(F)C(F)C(F)C(F)C(F)C(F)C(F)C(F)C(F)C(F)C(F)C(F)C(F)C(F)C(F)C(F)C(F)C(F)C(F)C(F)C(F)C(F)C(F)C(F)C(F)C(F)C(F)C(F)C(F)C(F)C(F)C(F)C(F)C(F)C(F)C(F)C(F)C(F)C(F)C(F)C(F)C(F)C(F)C(F)C(F)C(F)C(F)C(F)C(F)C(F)C(F)C(F)C(F)C(F)C(F)C(F)C(F)C(F)C(F)C(F)C(F)C(F)C(F)C(F)C(F)C(F)C(F)C(F)C(F)C(F)C(F)C(F)C(F)C(F)C(F)C(F)C(F)C(F)C(F)C(F)C(F)C(F)C(F)C(F)C(F)C(F)C(F)C(F)C(F)C(F)C(F)C(F)C(F)C(F)C(F)C(F)C(F)C(F)C(F)C(F)C(F)C(F)C(F)C(F)C(F)C(F)C(F)C(F)C(F)C(F)C(F)C(F)C(F)C(F)C(F)C(F)C(F)C(F)C(F)C(F)C(F)C(F)C(F)C(F)C(F)C(F)C(F)C(F)C(F)C(F)C(F)C(F)C(F)C(F)C(F)C(F)C(F)C(F)C(F)C(F)C(F)C(F)C(F)C(F)C(F)C(F)C(F)C(F)C(F)C(F)C(F)C(F)C(F)C(F)C(F)C(F)C(F)C(F)C(F)C(F)C(F)C(F)C(F)C(F)C(F)C(F)C(F)C(F)C(F)C(F)C(F)C(F)C(F)C(F)C(F)C(F)C(F)C(F)C(F)C(F)C(F)C(F)C(F)C(F)C(F)C(F)C(F)C(F)C(F)C(F)C(F)C(F)C(F)C(F)C(F)C(F)C(F)C(F)C(F)C(F)C(F)C(F)C(F)C(F)C(F)C(F)C(F)C(F)C(F)C(F)C(F)C(F)C(F)C(F)C(F)C(F)C(F)C(F)C(F)C(F)C(F)C(F)C(F)C(F)C(F)C(F)C(F)C(F)C(F)C(F)C(F)C(F)C(F)C(F)C(F)C(F)C(F)C(F)C(F)C(F)C(F)C(F)C(F)C(F)C(F)C(F)C(F)C(F)C(F)C(F)C(F)C(F)C(F)C(F)C(F)C(F)C(F)C(F)C(F)C(F)C(F)C(F)C(F)C(F)C(F)C(F)C(F)C(F)C(F)C(F)C(F)C(F)C(F)C(F)C(F)C(F)C(F)C(F)C(F)C(F)C(F)C(F)C(F)C(F)C(F)C(F)C(F)C(F)C(F)C(F)C(F)C(F)C(F)C(F)C(F)C(F)C(F)C(F)C(F)C(F)C(F)C(F)C(F)C(F)C(F)C(F)C(F)C(F)C(F)C(F)C(F)C(F)C(F)C(F)C(F)C(F)C(F)C(F)C(F)C(F)C(F)C(F)C(F)C(F)C(F)C(F)C(F)C(F)C(F)C(F)C(F |        |       |      |   |     |



[illegible]



[illegible]







[illegible]



|         |                                                                                |              |                                                                                                                                                                                                                                                         |        |       |      |   |  |     |
|---------|--------------------------------------------------------------------------------|--------------|---------------------------------------------------------------------------------------------------------------------------------------------------------------------------------------------------------------------------------------------------------|--------|-------|------|---|--|-----|
| QL02111 | 1,1,2,2,3,3,4,4,5,5,5-undecafluoropentane-1-sulfonamide                        | 8765-76-2    | F(C)(F)(C)(F)(C)(F)(C)(F)(F)(C)(F)(F)(S)=O)(N)=O                                                                                                                                                                                                        | -8.08  | 50.00 | 5.35 | P |  | IN  |
| QL02112 | N-ethyl-1,1,2,2,3,3,4,4,5,5,5-undecafluoropentane-1-sulfonan                   | 162682-16-8  | F(C)(F)(C)(F)(C)(F)(C)(F)(F)(C)(F)(F)(S)=O)(NCC)=O                                                                                                                                                                                                      | -8.25  | 39.29 | 5.54 | P |  | IN  |
| QL02113 | 3-(Perfluorobutyl)propanoic acid                                               | 80705-13-1   | F(C)(F)(C)(F)(C)(F)(C)(F)(F)(F)CCCC=O(O)                                                                                                                                                                                                                | -7.42  | 39.13 | 5.15 | P |  | IN  |
| QL02114 | 1-(Perfluoroheptyl)octane                                                      | 133331-77-8  | F(C)(F)(C)(F)(C)(F)(F)(F)(C)(F)(F)(C)(F)(F)CCCCCCCC                                                                                                                                                                                                     | -8.90  | 29.55 | 5.94 | P |  | OUT |
| QL02115 | Perfluorobutylsulphonamide                                                     | 30334-69-1   | F(C)(F)(C)(F)(C)(F)(C)(F)(F)(F)(S)=O)(N)=O                                                                                                                                                                                                              | -7.35  | 47.37 | 5.04 | P |  | IN  |
| QL02116 | di Ci-substituted perfluoroalkyl (linear) sulfonic acids, C8                   |              | F(C)(F)(C)(F)(C(S=O)=O)=O(F)(F)OC(F)(C)(F)(C)(F)(C)(F)(F)(F)F                                                                                                                                                                                           | -9.77  | 56.67 | 6.08 | P |  | IN  |
| QL02117 | Perfluro-1,2-bis(perfluorocyclohexyl)ethane                                    | 306-99-0     | F(C)(F)(C)(F)C1(F)(C)(F)(C)(F)(F)(C)(F)(F)C1(F)(C)(F)(C)(F)(C)F                                                                                                                                                                                         | -13.17 | 65.00 | 7.59 | P |  | OUT |
| QL02118 | 82 Fluorotelomer aldehyde                                                      | 135984-68-8  | F(C)(C)(F)(F)CC=O(C)(F)(C)(F)(C)(F)(F)(C)(F)(F)(F)F                                                                                                                                                                                                     | -9.58  | 54.84 | 6.01 | P |  | IN  |
| QL02119 | 42 Fluorotelomer aldehyde                                                      | 135984-67-7  | F(C)(C)(F)(F)CC=O(C)(F)(C)(F)F                                                                                                                                                                                                                          | -7.10  | 47.37 | 4.92 | P |  | IN  |
| QL02121 | double bond-, di-ether substituted perfluoroalkyl (linear) sulfonic acids, C7  |              | F(C)(F)(C(S=O)(O)=O)=O(F)(F)OC(F)(C)(F)(F)(C)(F)(F)=C(F)                                                                                                                                                                                                | -9.13  | 48.15 | 5.86 | P |  | IN  |
| QL02122 | H-substituted, di-ether-substituted perfluoroalkyl (linear) sulfonic acids, C7 |              | F(C)(F)(C(S=O)(O)=O)=O(F)(F)OC(F)(C)(F)(F)(F)OC(F)(C)([H])F                                                                                                                                                                                             | -9.29  | 48.28 | 5.94 | P |  | IN  |
| QL02123 | 1,8-Divinyperfluorooctane                                                      | 35192-44-0   | F(C)(F)=C=C(C)(F)(F)(C)(F)(F)(C)(F)(F)(C)(F)(F)(C)F<C                                                                                                                                                                                                   | -9.42  | 47.06 | 6.01 | P |  | IN  |
| QL02124 | 1,6-Divinylperfluorohexane                                                     | 1800-91-5    | F(C)(F)=C=C(C)(F)(F)(C)(F)(F)(C)(F)(F)(C)(F)<C                                                                                                                                                                                                          | -8.33  | 42.86 | 5.54 | P |  | IN  |
| QL02125 | 1,4-Divinyperfluorobutane                                                      | 678-65-9     | F(C)(F)=C=C(C)(F)(F)(C)(F)F<C                                                                                                                                                                                                                           | -6.87  | 36.36 | 4.92 | P |  | IN  |
| QL02126 | Perfluoro(4a-(cyclohexymethyl)decahydronaphthalene)                            | 125061-94-1  | F(C)(F)C1(F)(C)(F)(C)(F)(F)(C)(F)(F)C1(F)F1(C)(F)(C)(F)(F)(C2(F)(C)(F)(F)(C)(F)(F)J(C)(F)C12F                                                                                                                                                           | -14.97 | 63.83 | 8.45 | P |  | OUT |
| QL02127 | Perfluoroperhydrobenzyl tetralin                                               | 116265-66-8  | F(C)(F)C1(F)(C)(F)(C)(F)(F)(C)(F)(F)C1(F)F1(C)(F)(C)(F)(F)C2(F)(C)(F)(F)(C)(F)(C)(F)J(C2)C1(F)F                                                                                                                                                         | -14.97 | 63.83 | 8.45 | P |  | OUT |
| QL02128 | [1,1,1,2,2,3,3,4,4,14,14,15,15,16,16,17,17-Octadecaefluoro-                    | 217805-03-3  | F(C)(F)CCCC([SnH]C)=C(CCCC(F)(C)(F)(C)(F)(C)(F)F)CCCC(F)(C)(F)(C)(F)(C)(F)(F)(F)(F)C(I)(F)(C)(F)F]^1:7                                                                                                                                                  | -11.82 | 36.99 | 7.23 | P |  | OUT |
| QL02129 | Decane, 3,3,4,4,5,5,6,6,7,7,8,8-dodecafuoro-1,10-diiodo-                       | 1813-83-8    | F(C)(F)CCCI(C)(F)(C)(F)(C)(F)(C)(F)(C)(F)(C)CI<br>F(C)(F)CCOP(=O)(OCCC(F)(F)(F)(C)(F)(F)(C)(F)(F)(C)(F)(F)(F)O(C)(F)(C)(F)(C)(F)J(F)(C)(F)(F)(C)(F)(F)(F)F<br>F(C)(F)CCOP(=O)(OCCC(F)(F)(F)(C)(F)(F)(C)(F)(F)O(C)(F)(C)(F)(F)(C)(F)(F)(C)(F)(C)(F)J(F)F | -8.71  | 43.75 | 5.71 | P |  | IN  |
| QL02130 | 82 Fluorotelomer phosphate diester                                             | 678-41-1     | F(C)(F)CCOP(=O)(OCCC(F)(F)(F)(C)(F)(F)(C)(F)(F)O(C)(F)(C)(F)(F)(C)(F)(F)(C)(F)(C)(F)J(F)F                                                                                                                                                               | -12.62 | 50.00 | 7.48 | P |  | OUT |
| QL02131 | 62 Fluorotelomer phosphate diester                                             | 4004-51-7    | F(C)(F)CCOP(=O)(OCCC(F)(F)(F)(C)(F)(F)(C)(F)(F)O(C)(F)(C)(F)(F)(C)(F)(F)(C)(F)(C)(F)J(F)F                                                                                                                                                               | -11.59 | 46.43 | 7.03 | P |  | OUT |
| QL02133 | Bis(3,5,6-trichloro-2,2,3,4,4,5,6,6-octafluoro-1-oxohexyl)pero                 | 28285-49-6   | F(C)(F)(Cl)(C)(F)(Cl)(C)(F)(C)(F)(Cl)(C)(F)(Cl)(C)(F)(F)Cl                                                                                                                                                                                              | -10.93 | 57.89 | 6.61 | P |  | OUT |
| QL02134 | 3,5,6-Trichloro-2,2,3,4,4,5,6,6-octafluorohexanoyl chloride                    | 1422-98-6    | F(C)(F)(Cl)(C)(F)(Cl)(C)(F)(C)(F)(Cl)(C)(F)(Cl)(C)(F)(Cl)=O                                                                                                                                                                                             | -8.14  | 63.16 | 5.25 | P |  | IN  |
| QL02135 | 4,5-Dichloroperfluoro-3-oxapantanesulfonyl fluoride                            | 144728-59-6  | F(Cl)(F)(Cl)(C)(F)(Cl)OC(F)(F)(F)(F)(S)=O=O                                                                                                                                                                                                             | -7.76  | 55.56 | 5.15 | P |  | IN  |
| QL02136 | 1,1,3-trichloro-1,2,2,3,3-pentafluoropropane                                   | 1652-81-9    | F(Cl)(F)(Cl)(F)(C)(F)(Cl)(F)                                                                                                                                                                                                                            | -6.10  | 72.73 | 4.20 | P |  | OUT |
| QL02137 | 1,8-Dichloroperfluorooctane                                                    | 647-25-6     | F(Cl)(F)(Cl)(C)(F)(F)(C)(F)(F)(C)(F)(F)(C)(F)(F)(C)(F)(F)Cl                                                                                                                                                                                             | -9.57  | 69.23 | 5.86 | P |  | OUT |
| QL02138 | 1-Chloro-8-iodoperfluorooctane                                                 | 16486-98-9   | F(C)(F)(Cl)(C)(F)(F)(C)(F)(F)(C)(F)(F)(C)(F)(F)(C)(F)(F)I                                                                                                                                                                                               | -9.57  | 69.23 | 5.86 | P |  | OUT |
| QL02139 | 11-chloroperfluoro-3-oxaundecanesulfonyl fluoride                              | 73606-15-2   | F(C)(F)(Cl)(C)(F)(F)(C)(F)(F)(C)(F)(F)(C)(F)(F)(C)(F)(F)OC(F)(F)(F)(F)(S)=O=O                                                                                                                                                                           | -10.77 | 61.11 | 6.50 | P |  | OUT |
| QL02140 | 1-Chloro-6-iodoperfluorohexane                                                 | 16486-97-8   | F(C)(F)(Cl)(C)(F)(F)(C)(F)(F)(C)(F)(F)(C)(F)I                                                                                                                                                                                                           | -8.50  | 70.00 | 5.35 | P |  | OUT |
| QL02142 | 1,4-Dichloro-1,1,2,2,3,3,4,4-octafluorobutane                                  | 355-24-8     | F(C)(F)(Cl)(C)(F)(F)(C)(F)(F)(Cl)                                                                                                                                                                                                                       | -7.06  | 71.43 | 4.66 | P |  | OUT |
| QL02143 | 1,3-Dichloro-1,1,2,2,3,3,4,4-hexafluoropropane                                 | 662-01-1     | F(C)(F)(Cl)(C)(F)(F)(C)(F)(Cl)                                                                                                                                                                                                                          | -6.10  | 72.73 | 4.20 | P |  | OUT |
| QL02144 | 1H,1H,6H,6H-Perfluorohexane-1,6-diol diacrylate                                | 2264-01-9    | F(C)(F)COC(=O)=C=C(F)(C)(F)(F)(F)(F)COC(=O)C=C                                                                                                                                                                                                          | -8.29  | 23.53 | 5.71 | P |  | OUT |
| QL02145 | 1H,1H,5H,5H-Perfluoro-1,5-pentadiol diacrylate                                 | 678-95-5     | F(C)(F)COC(=O)=C=C(F)(C)(F)(F)(F)COC(=O)C=C                                                                                                                                                                                                             | -7.64  | 19.35 | 5.45 | P |  | OUT |
| QL02146 | 1,5-bis(2,3-epoxypropoxyl)-2,2,3,3,4,4-hexafluoropentane                       | 4798-39-4    | F(C)(F)COC(C1OC1)(C)(F)(F)(F)COC(C2OC2                                                                                                                                                                                                                  | -8.24  | 17.14 | 5.75 | P |  | OUT |
| QL02147 | cis-Perfluoro-2,4-dimethylcyclobutane                                          | 1583-97-7    | F(C)(F)F[C@H](F)(C)(F)F[C@H](F)(C)(F)(F)C@H](F)(C)(F)(F)C1(F)F                                                                                                                                                                                          | -9.10  | 66.67 | 5.67 | P |  | IN  |
| QL02148 | (2R,4R)-1,1,2,3,3,4-Hexafluoro-2,4-bis(trifluoromethyl)cyclobu                 | 1583-98-8    | F(C)(F)F[C@H](F)(C)(F)F[C@H](F)(C)(F)(F)C1(F)F                                                                                                                                                                                                          | -9.10  | 66.67 | 5.67 | P |  | IN  |
| QL02149 | double bond-, ether-substituted perfluoroalkyl (linear) carboxylic acids, n=4  |              | F(C)(F)(F)/C(F)=C(F)/C(F)(F)(C)(F)(F)(C)(F)(F)OC(F)(F)(C)(F)=O                                                                                                                                                                                          | -9.40  | 53.57 | 5.94 | P |  | IN  |
| QL02150 | double bond-, ether-substituted perfluoroalkyl (linear) carboxylic acids, n=3  |              | F(C)(F)(F)/C(F)=C(F)/C(F)(F)(C)(F)(F)(F)OC(F)(F)(C)(F)=O                                                                                                                                                                                                | -8.88  | 52.00 | 5.71 | P |  | IN  |
| QL02151 | double bond-, ether-substituted perfluoroalkyl (linear) carboxylic acids, n=1  |              | F(C)(F)(F)/C(F)=C(F)/C(F)(F)(F)OC(F)(F)(C)(F)=O                                                                                                                                                                                                         | -8.28  | 50.00 | 5.45 | P |  | IN  |
| QL02152 | double bond-, ether-substituted perfluoroalkyl (linear) carboxylic acids, n=2  |              | F(C)(F)(F)/C(F)=C(F)/C(F)(F)OC(F)(F)(C)(F)=O                                                                                                                                                                                                            | -7.59  | 47.37 | 5.15 | P |  | IN  |
| QL02153 | double bond-, ether-substituted perfluoroalkyl (linear) carboxylic acids, n=0  |              | F(C)(F)(F)/C(F)=C(OC(F)(F)(C)(F)=O)=OF                                                                                                                                                                                                                  | -6.76  | 43.75 | 4.80 | P |  | IN  |
| QL02154 | H-substituted perfluoroalkyl (linear) sulfonic acids, ii, n=8                  |              | F(C)(F)(F)(C)(H))F(C)(F)(F)(C)(F)(F)(C)(F)(F)(C)(F)(F)(F)(F)(F)(S)=O)(O)=O                                                                                                                                                                              | -10.41 | 55.56 | 6.39 | P |  | IN  |
| QL02155 | H-substituted perfluoroalkyl (linear) sulfonic acids, ii, n=7                  |              | F(C)(F)(F)(C)(H))F(C)(F)(F)(C)(F)(F)(C)(F)(F)(C)(F)(F)(F)(F)(F)(S)=O)(O)=O                                                                                                                                                                              | -10.00 | 54.55 | 6.21 | P |  | IN  |
| QL02156 | H-substituted perfluoroalkyl (linear) sulfonic acids, ii, n=6                  |              | F(C)(F)(F)(C)(H))F(C)(F)(F)(C)(F)(F)(C)(F)(F)(C)(F)(F)(F)(F)(F)(S)=O)(O)=O                                                                                                                                                                              | -9.55  | 53.33 | 6.01 | P |  | IN  |
| QL02157 | H-substituted perfluoroalkyl (linear) sulfonic acids, ii, n=5                  |              | F(C)(F)(F)(C)(H))F(C)(F)(F)(C)(F)(F)(F)(F)(F)(C)(F)(F)(S)=O)(O)=O                                                                                                                                                                                       | -9.05  | 51.85 | 5.79 | P |  | IN  |
| QL02158 | H-substituted perfluoroalkyl (linear) sulfonic acids, ii, n=4                  |              | F(C)(F)(F)(C)(H))F(C)(F)(F)(C)(F)(F)(F)(F)F(C)(F)(F)(S)=O)(O)=O                                                                                                                                                                                         | -8.48  | 50.00 | 5.54 | P |  | IN  |
| QL02159 | H-substituted perfluoroalkyl (linear) sulfonic acids, ii, n=3                  |              | F(C)(F)(F)(C)(H))F(C)(F)(F)(C)(F)(F)F(S)=O)(O)=O                                                                                                                                                                                                        | -7.82  | 47.62 | 5.25 | P |  | IN  |
| QL02160 | H-substituted perfluoroalkyl (linear) sulfonic acids, ii, n=2                  |              | F(C)(F)(F)(C)(H))F(C)(F)(F)(F)(F)F(S)=O)(O)=O                                                                                                                                                                                                           | -7.04  | 44.44 | 4.92 | P |  | IN  |
| QL02161 | H-substituted perfluoroalkyl (linear) sulfonic acids, ii, n=1                  |              | F(C)(F)(F)(C)(H))F(C)(F)(F)(F)F(S)=O)(O)=O                                                                                                                                                                                                              | -6.10  | 40.00 | 4.52 | P |  | IN  |
| QL02162 | Perfluoro-3-ethyl-2,4-dimethyl-2-pentene                                       | 30320-26-4   | F(C)(F)(F)C=C(C(F)(F)(F)(C)(F)(F)(C)(F)(F)F)C(F)(F)(C)(F)(F)F                                                                                                                                                                                           | -9.68  | 66.67 | 5.94 | P |  | IN  |
| QL02163 | 1,1-Bis(trifluoromethyl)ethylene                                               | 382-10-5     | F(C)(F)F(C)=C(C)(F)F                                                                                                                                                                                                                                    | -5.25  | 50.00 | 4.03 | P |  | IN  |
| QL02164 | 5-Fluoro-5,7,7-tris(trifluoromethyl)-6-(2,2,2-trifluoro-1-(trifluo             | 94333-56-9   | F(C)(F)(F)C=C1(C)(F)(OCCOC1(C)(F)(F)(F)(F)(F)(F)(F)(F)F                                                                                                                                                                                                 | -10.74 | 48.48 | 6.61 | P |  | OUT |
| QL02165 | 3-Trifluoromethylperfluoro-2-pentanone                                         | 93830-92-3   | F(C)(F)(F)C=O(C)(F)(C)(F)(F)(C)(F)F                                                                                                                                                                                                                     | -8.14  | 63.16 | 5.25 | P |  | IN  |
| QL02166 | 1,1,1,3,4,4,4-Heptafluoro-3-(trifluoromethyl)butan-2-one                       | 756-12-7     | F(C)(F)(F)C=O(C)(F)(C)(F)(F)(C)(F)F                                                                                                                                                                                                                     | -7.42  | 62.50 | 4.92 | P |  | IN  |
| QL02167 | 1,1,1,3,3,4,4,5,5-Nonafluoro-4-(trifluoromethyl)pentan-2-one                   | 73041-05-1   | F(C)(F)(F)C=O(C)(F)(C)(F)(C)(F)(F)(C)(F)F                                                                                                                                                                                                               | -8.14  | 63.16 | 5.25 | P |  | IN  |
| QL02168 | ketone perfluoroalkyl (linear) carboxylic acids, n=8                           |              | F(C)(F)(F)C=O(C)(F)(F)(C)(F)(F)(C)(F)(F)(C)(F)(F)(C)(F)(F)(F)(F)(F)(F)F(S)=O)(O)=O                                                                                                                                                                      | -10.39 | 54.29 | 6.39 | P |  | IN  |
| QL02169 | ketone perfluoroalkyl (linear) carboxylic acids, n=7                           |              | F(C)(F)(F)C=O(C)(F)(F)(C)(F)(F)(C)(F)(F)(C)(F)(F)(C)(F)(F)(F)(F)(F)(F)F(S)=O)(O)=O                                                                                                                                                                      | -9.97  | 53.13 | 6.21 | P |  | IN  |
| QL02170 | ketone perfluoroalkyl (linear) carboxylic acids, n=5                           |              | F(C)(F)(F)C=O(C)(F)(F)(C)(F)(F)(C)(F)(F)(C)(F)(F)(F)(F)(F)(F)(F)F(S)=O)(O)=O                                                                                                                                                                            | -9.01  | 50.00 | 5.79 | P |  | IN  |
| QL02171 | ketone perfluoroalkyl (linear) carboxylic acids, n=4                           |              | F(C)(F)(F)C=O(C)(F)(F)(C)(F)(F)(C)(F)(F)(C)(F)(F)(F)(F)(F)(F)F(S)=O)(O)=O                                                                                                                                                                               | -8.43  | 47.83 | 5.54 | P |  | IN  |
| QL02172 | ketone perfluoroalkyl (linear) carboxylic acids, n=3                           |              | F(C)(F)(F)C=O(C)(F)(F)(C)(F)(F)(F)(F)F(S)=O)(O)=O                                                                                                                                                                                                       | -7.76  | 45.00 | 5.25 | P |  | IN  |
| QL02173 | 2,2,2-Trifluoro-1-[4-(tridecafluorohexyl)phenyl]ethan-1-one                    | 171183-94-1  | F(C)(F)(F)C(=O)C1ccc(cc1)(F)(F)(C)(F)(F)(C)(F)(F)(C)(F)(F)(F)(F)(F)(F)(F)F                                                                                                                                                                              | -10.70 | 45.71 | 6.62 | P |  | OUT |
| QL02174 | 1,1,1,5,5,6,6,7,7,8,8,9,9,10,10,10-hexadecafluorodecane-2,4-c                  | 147874-76-8  | F(C)(F)(F)C(=O)CC(=O)C(F)(F)(C)(F)(F)(C)(F)(F)(F)(F)(F)(F)(F)F                                                                                                                                                                                          | -9.55  | 53.33 | 6.01 | P |  | IN  |
| QL02175 | 1,1,1,5,5,6,6,7,7,8,8-dodecafluorooctane-2,4-dione                             | 261503-40-6  | F(C)(F)(F)C(=O)CC(=O)C(F)(F)(C)(F)(F)(C)(F)(F)(F)(F)F                                                                                                                                                                                                   | -8.48  | 50.00 | 5.54 | P |  | IN  |
| QL02176 | 3H,3H-Perfluorooheptane-2,4-dione                                              | 20583-66-8   | F(C)(F)(F)C(=O)CC(=O)C(F)(F)(C)(F)(F)(F)F                                                                                                                                                                                                               | -7.82  | 47.62 | 5.25 | P |  | IN  |
| QL02177 | 3H,3H-Perfluoro-2,4-hexanedione                                                | 20825-07-4   | F(C)(F)(F)C(=O)CC(=O)C(F)(F)(F)F                                                                                                                                                                                                                        | -7.04  | 44.44 | 4.92 | P |  | IN  |
| QL02178 | 3-(Perfluorohexyl)-1-(trifluoroacetyl)-5-(trifluoromethyl)-1H-p                | 261778-38-5  | F(C)(F)(F)C(=O)N1N=C(C=C1C(F)(F)(F)(F)(F)(F)(F)(F)(F)(F)(F)(F)(F)(F)(F)(F)F                                                                                                                                                                             | -11.35 | 54.29 | 6.84 | P |  | OUT |
| QL02179 | 2,2,3,3,4,4,4-Heptafluorobutyl trifluoroacetate                                | 1365808-09-8 | F(C)(F)(F)C(=O)OCC(F)(F)(F)(F)(F)(F)F                                                                                                                                                                                                                   | -7.64  | 50.00 | 5.15 | P |  | IN  |
| QL02180 | 2,2,3,3,4,4,4-Heptafluoro-N-[(trifluoroacetyl)oxy]butanamide                   | 88326-80-1   | F(C)(F)(F)C(=O)ONC(=O)C(F)(F)(C)(F)(F)(F)F                                                                                                                                                                                                              | -8.03  | 47.62 | 5.35 | P |  | IN  |
| QL02181 | 1,1,1,3,3,5,5-Octafluoro-2,2,4,4-tetrakis(trifluoromethyl)pen                  | 62375-54-6   | F(C)(F)(F)C(C)(F)(F)(C)(F)(F)(C)(F)(F)(C)(F)(F)(F)(F)(F)(F)(F)F                                                                                                                                                                                         | -10.02 | 68.97 | 6.08 | P |  | IN  |
| QL02182 | Perfluoro-2,2,5,5-tetramethylhexane                                            | 71076-47-6   | F(C)(F)(F)C(C)(F)(F)(C)(F)(F)(C)(F)(F)(C)(F)(F)(C)(F)(F)(C)(F)(F)F                                                                                                                                                                                      | -10.43 | 68.75 | 6.27 | P |  | IN  |
| QL02183 | 2,2-bis(Trifluoromethyl)perfluoropropane                                       | 374-51-6     | F(C)(F)(F)C(C)(F)(F)(C)(F)(F)(C)(F)F                                                                                                                                                                                                                    | -7.84  | 70.59 | 5.04 | P |  | OUT |
| QL02184 | Perfluoro tert-butylcyclohexane                                                | 84808-64-0   | F(C)(F)(C)(C)(F)(F)(C)(F)(F)C1(C)(F)(C)(F)(F)(C)(F)(F)(C)(F)(F)C1(F)F                                                                                                                                                                                   | -11.22 | 66.67 | 6.66 | P |  | OUT |



[illegible]



[illegible]







|         |                                                                |             |                                                                                                                                                                                                                                                                                                                                                                                                                                                                                                                                                                                                                                                                                                                                                                                                                                                                                                                                                                                                                                                                                                                                                                                                                                                                                                                                                                                                                                                                                                                                                                                                                                                                                                                                                                                                                                                                                                                                                                                                                                                                                                                                                                                                                                                                                                                                                                                                                                                                                                                                                                                                                                                                                                                                                                                                                                                                                                                                                                                                                                                                                                                                                                                                                                                                                                                                                                                                                                                                                                                                                                                                                                                                                                                                                                                                                                                                                                                                                                                                                                                                                                                                                                                                                                                                                                                                                                                                                                                                                                                                                                                                                                                                                                                                                                                                                                                                                                                                                                                                                                                                                                                                                                                                                                                                                                                                                                                                                                                                                                                                                                                                                                                                                                                                                                                                                                                                                                                                                                                                                                                                                                                                                                                                                                                                                                                                                                                                                                                                                                                                                                                                                                                                                                                                                                                                                                                                                                                                                                                                                                                                                                                                                                                                                                                                                                                                                                                                                                                                                                                                                                                                                                                                                                                                                                                                                                                                                                                                                                                                                                                                                                                                                                                                                                                                                                                                                                                                                                                                                                                                                                                                                                                                                                                                                                                                                                                                                                                                                                                                                                                                                                                                                                                                                                                                                                                                                                                                                                                                                                                                                                                                                                                                                                                                                                                                                                                                                                                                                                                                                                                                                                                                                                                                                                                                                                                                                                                                                                                                                                                                                                                                                                                                                                                                                                                                                                                                                                                                                                                                                                                                                                                                                                                                                                                                                                                                                                                                                                                                                                                                                                                                                                  |       |       |      |   |  |     |
|---------|----------------------------------------------------------------|-------------|----------------------------------------------------------------------------------------------------------------------------------------------------------------------------------------------------------------------------------------------------------------------------------------------------------------------------------------------------------------------------------------------------------------------------------------------------------------------------------------------------------------------------------------------------------------------------------------------------------------------------------------------------------------------------------------------------------------------------------------------------------------------------------------------------------------------------------------------------------------------------------------------------------------------------------------------------------------------------------------------------------------------------------------------------------------------------------------------------------------------------------------------------------------------------------------------------------------------------------------------------------------------------------------------------------------------------------------------------------------------------------------------------------------------------------------------------------------------------------------------------------------------------------------------------------------------------------------------------------------------------------------------------------------------------------------------------------------------------------------------------------------------------------------------------------------------------------------------------------------------------------------------------------------------------------------------------------------------------------------------------------------------------------------------------------------------------------------------------------------------------------------------------------------------------------------------------------------------------------------------------------------------------------------------------------------------------------------------------------------------------------------------------------------------------------------------------------------------------------------------------------------------------------------------------------------------------------------------------------------------------------------------------------------------------------------------------------------------------------------------------------------------------------------------------------------------------------------------------------------------------------------------------------------------------------------------------------------------------------------------------------------------------------------------------------------------------------------------------------------------------------------------------------------------------------------------------------------------------------------------------------------------------------------------------------------------------------------------------------------------------------------------------------------------------------------------------------------------------------------------------------------------------------------------------------------------------------------------------------------------------------------------------------------------------------------------------------------------------------------------------------------------------------------------------------------------------------------------------------------------------------------------------------------------------------------------------------------------------------------------------------------------------------------------------------------------------------------------------------------------------------------------------------------------------------------------------------------------------------------------------------------------------------------------------------------------------------------------------------------------------------------------------------------------------------------------------------------------------------------------------------------------------------------------------------------------------------------------------------------------------------------------------------------------------------------------------------------------------------------------------------------------------------------------------------------------------------------------------------------------------------------------------------------------------------------------------------------------------------------------------------------------------------------------------------------------------------------------------------------------------------------------------------------------------------------------------------------------------------------------------------------------------------------------------------------------------------------------------------------------------------------------------------------------------------------------------------------------------------------------------------------------------------------------------------------------------------------------------------------------------------------------------------------------------------------------------------------------------------------------------------------------------------------------------------------------------------------------------------------------------------------------------------------------------------------------------------------------------------------------------------------------------------------------------------------------------------------------------------------------------------------------------------------------------------------------------------------------------------------------------------------------------------------------------------------------------------------------------------------------------------------------------------------------------------------------------------------------------------------------------------------------------------------------------------------------------------------------------------------------------------------------------------------------------------------------------------------------------------------------------------------------------------------------------------------------------------------------------------------------------------------------------------------------------------------------------------------------------------------------------------------------------------------------------------------------------------------------------------------------------------------------------------------------------------------------------------------------------------------------------------------------------------------------------------------------------------------------------------------------------------------------------------------------------------------------------------------------------------------------------------------------------------------------------------------------------------------------------------------------------------------------------------------------------------------------------------------------------------------------------------------------------------------------------------------------------------------------------------------------------------------------------------------------------------------------------------------------------------------------------------------------------------------------------------------------------------------------------------------------------------------------------------------------------------------------------------------------------------------------------------------------------------------------------------------------------------------------------------------------------------------------------------------------------------------------------------------------------------------------------------------------------------------------------------------------------------------------------------------------------------------------------------------------------------------------------------------------------------------------------------------------------------------------------------------------------------------------------------------------------------------------------------------------------------------------------------------------------------------------------------------------------------------------------------------------------------------------------------------------------------------------------------------------------------------------------------------------------------------------------------------------------------------------------------------------------------------------------------------------------------------------------------------------------------------------------------------------------------------------------------------------------------------------------------------------------------------------------------------------------------------------------------------------------------------------------------------------------------------------------------------------------------------------------------------------------------------------------------------------------------------------------------------------------------------------------------------------------------------------------------------------------------------------------------------------------------------------------------------------------------------------------------------------------------------------------------------------------------------------------------------------------------------------------------------------------------------------------------------------------------------------------------------------------------------------------------------------------------------------------------------------------------------------------------------------------------------------------------------------------------------------------------------------------------------------------------------------------------------------------------------------------------------------------------------------------------------------------------------------------------------------------------------------------------------------------------------------------------------------------------------------------------------------------------------------------------------------------------------------------------------------------------------------------------------------------------------------------------------------------------------------------------------------------------------------------------------------------------------------------------------------------------------------------------------------------------------------------------------------------------------------------------------------------------------------------------------------------------------------------------|-------|-------|------|---|--|-----|
| QL02403 | 2-Chloro-3,4,4,5,5,6,6,6-nonafluorohex-1-ene                   | 110927-72-5 | FC(F)F(C)F(F)C(F)F(C)F(C)C)=C                                                                                                                                                                                                                                                                                                                                                                                                                                                                                                                                                                                                                                                                                                                                                                                                                                                                                                                                                                                                                                                                                                                                                                                                                                                                                                                                                                                                                                                                                                                                                                                                                                                                                                                                                                                                                                                                                                                                                                                                                                                                                                                                                                                                                                                                                                                                                                                                                                                                                                                                                                                                                                                                                                                                                                                                                                                                                                                                                                                                                                                                                                                                                                                                                                                                                                                                                                                                                                                                                                                                                                                                                                                                                                                                                                                                                                                                                                                                                                                                                                                                                                                                                                                                                                                                                                                                                                                                                                                                                                                                                                                                                                                                                                                                                                                                                                                                                                                                                                                                                                                                                                                                                                                                                                                                                                                                                                                                                                                                                                                                                                                                                                                                                                                                                                                                                                                                                                                                                                                                                                                                                                                                                                                                                                                                                                                                                                                                                                                                                                                                                                                                                                                                                                                                                                                                                                                                                                                                                                                                                                                                                                                                                                                                                                                                                                                                                                                                                                                                                                                                                                                                                                                                                                                                                                                                                                                                                                                                                                                                                                                                                                                                                                                                                                                                                                                                                                                                                                                                                                                                                                                                                                                                                                                                                                                                                                                                                                                                                                                                                                                                                                                                                                                                                                                                                                                                                                                                                                                                                                                                                                                                                                                                                                                                                                                                                                                                                                                                                                                                                                                                                                                                                                                                                                                                                                                                                                                                                                                                                                                                                                                                                                                                                                                                                                                                                                                                                                                                                                                                                                                                                                                                                                                                                                                                                                                                                                                                                                                                                                                                                                                                    | -7.27 | 55.56 | 4.92 | P |  | IN  |
| QL02404 | Nonafluoropentanoyl chloride                                   | 375-60-0    | FC(F)F(C)F(F)C(F)F(C)F(C)F(C)Cl=O                                                                                                                                                                                                                                                                                                                                                                                                                                                                                                                                                                                                                                                                                                                                                                                                                                                                                                                                                                                                                                                                                                                                                                                                                                                                                                                                                                                                                                                                                                                                                                                                                                                                                                                                                                                                                                                                                                                                                                                                                                                                                                                                                                                                                                                                                                                                                                                                                                                                                                                                                                                                                                                                                                                                                                                                                                                                                                                                                                                                                                                                                                                                                                                                                                                                                                                                                                                                                                                                                                                                                                                                                                                                                                                                                                                                                                                                                                                                                                                                                                                                                                                                                                                                                                                                                                                                                                                                                                                                                                                                                                                                                                                                                                                                                                                                                                                                                                                                                                                                                                                                                                                                                                                                                                                                                                                                                                                                                                                                                                                                                                                                                                                                                                                                                                                                                                                                                                                                                                                                                                                                                                                                                                                                                                                                                                                                                                                                                                                                                                                                                                                                                                                                                                                                                                                                                                                                                                                                                                                                                                                                                                                                                                                                                                                                                                                                                                                                                                                                                                                                                                                                                                                                                                                                                                                                                                                                                                                                                                                                                                                                                                                                                                                                                                                                                                                                                                                                                                                                                                                                                                                                                                                                                                                                                                                                                                                                                                                                                                                                                                                                                                                                                                                                                                                                                                                                                                                                                                                                                                                                                                                                                                                                                                                                                                                                                                                                                                                                                                                                                                                                                                                                                                                                                                                                                                                                                                                                                                                                                                                                                                                                                                                                                                                                                                                                                                                                                                                                                                                                                                                                                                                                                                                                                                                                                                                                                                                                                                                                                                                                                                                                | -7.42 | 62.50 | 4.92 | P |  | IN  |
| QL02405 | 5,6-Dichloro-1,1,1,2,2,3,3,4,4-nonafluorohexane                | 136483-77-7 | FC(F)F(C)F(F)C(F)F(C)F(C)F(C)CCl                                                                                                                                                                                                                                                                                                                                                                                                                                                                                                                                                                                                                                                                                                                                                                                                                                                                                                                                                                                                                                                                                                                                                                                                                                                                                                                                                                                                                                                                                                                                                                                                                                                                                                                                                                                                                                                                                                                                                                                                                                                                                                                                                                                                                                                                                                                                                                                                                                                                                                                                                                                                                                                                                                                                                                                                                                                                                                                                                                                                                                                                                                                                                                                                                                                                                                                                                                                                                                                                                                                                                                                                                                                                                                                                                                                                                                                                                                                                                                                                                                                                                                                                                                                                                                                                                                                                                                                                                                                                                                                                                                                                                                                                                                                                                                                                                                                                                                                                                                                                                                                                                                                                                                                                                                                                                                                                                                                                                                                                                                                                                                                                                                                                                                                                                                                                                                                                                                                                                                                                                                                                                                                                                                                                                                                                                                                                                                                                                                                                                                                                                                                                                                                                                                                                                                                                                                                                                                                                                                                                                                                                                                                                                                                                                                                                                                                                                                                                                                                                                                                                                                                                                                                                                                                                                                                                                                                                                                                                                                                                                                                                                                                                                                                                                                                                                                                                                                                                                                                                                                                                                                                                                                                                                                                                                                                                                                                                                                                                                                                                                                                                                                                                                                                                                                                                                                                                                                                                                                                                                                                                                                                                                                                                                                                                                                                                                                                                                                                                                                                                                                                                                                                                                                                                                                                                                                                                                                                                                                                                                                                                                                                                                                                                                                                                                                                                                                                                                                                                                                                                                                                                                                                                                                                                                                                                                                                                                                                                                                                                                                                                                                                                 | -7.51 | 55.00 | 5.04 | P |  | IN  |
| QL02406 | Perfluoro-3-methylheptane                                      | 153273-33-5 | FC(F)F(C)F(F)C(F)F(C)F(C)F(C)F(F)F                                                                                                                                                                                                                                                                                                                                                                                                                                                                                                                                                                                                                                                                                                                                                                                                                                                                                                                                                                                                                                                                                                                                                                                                                                                                                                                                                                                                                                                                                                                                                                                                                                                                                                                                                                                                                                                                                                                                                                                                                                                                                                                                                                                                                                                                                                                                                                                                                                                                                                                                                                                                                                                                                                                                                                                                                                                                                                                                                                                                                                                                                                                                                                                                                                                                                                                                                                                                                                                                                                                                                                                                                                                                                                                                                                                                                                                                                                                                                                                                                                                                                                                                                                                                                                                                                                                                                                                                                                                                                                                                                                                                                                                                                                                                                                                                                                                                                                                                                                                                                                                                                                                                                                                                                                                                                                                                                                                                                                                                                                                                                                                                                                                                                                                                                                                                                                                                                                                                                                                                                                                                                                                                                                                                                                                                                                                                                                                                                                                                                                                                                                                                                                                                                                                                                                                                                                                                                                                                                                                                                                                                                                                                                                                                                                                                                                                                                                                                                                                                                                                                                                                                                                                                                                                                                                                                                                                                                                                                                                                                                                                                                                                                                                                                                                                                                                                                                                                                                                                                                                                                                                                                                                                                                                                                                                                                                                                                                                                                                                                                                                                                                                                                                                                                                                                                                                                                                                                                                                                                                                                                                                                                                                                                                                                                                                                                                                                                                                                                                                                                                                                                                                                                                                                                                                                                                                                                                                                                                                                                                                                                                                                                                                                                                                                                                                                                                                                                                                                                                                                                                                                                                                                                                                                                                                                                                                                                                                                                                                                                                                                                                                                               | -9.57 | 69.23 | 5.86 | P |  | OUT |
| QL02407 | 2,2,3,3,4,4,5,5,6,6,6-Undecafluoro-N-(2-phenylethyl)hexanamide | 70414-01-6  | FC(F)F(C)F(F)C(F)F(C)F(C)F(C)F(C)C(=O)Nc1ccccc1                                                                                                                                                                                                                                                                                                                                                                                                                                                                                                                                                                                                                                                                                                                                                                                                                                                                                                                                                                                                                                                                                                                                                                                                                                                                                                                                                                                                                                                                                                                                                                                                                                                                                                                                                                                                                                                                                                                                                                                                                                                                                                                                                                                                                                                                                                                                                                                                                                                                                                                                                                                                                                                                                                                                                                                                                                                                                                                                                                                                                                                                                                                                                                                                                                                                                                                                                                                                                                                                                                                                                                                                                                                                                                                                                                                                                                                                                                                                                                                                                                                                                                                                                                                                                                                                                                                                                                                                                                                                                                                                                                                                                                                                                                                                                                                                                                                                                                                                                                                                                                                                                                                                                                                                                                                                                                                                                                                                                                                                                                                                                                                                                                                                                                                                                                                                                                                                                                                                                                                                                                                                                                                                                                                                                                                                                                                                                                                                                                                                                                                                                                                                                                                                                                                                                                                                                                                                                                                                                                                                                                                                                                                                                                                                                                                                                                                                                                                                                                                                                                                                                                                                                                                                                                                                                                                                                                                                                                                                                                                                                                                                                                                                                                                                                                                                                                                                                                                                                                                                                                                                                                                                                                                                                                                                                                                                                                                                                                                                                                                                                                                                                                                                                                                                                                                                                                                                                                                                                                                                                                                                                                                                                                                                                                                                                                                                                                                                                                                                                                                                                                                                                                                                                                                                                                                                                                                                                                                                                                                                                                                                                                                                                                                                                                                                                                                                                                                                                                                                                                                                                                                                                                                                                                                                                                                                                                                                                                                                                                                                                                                                                                                  | -9.49 | 29.73 | 6.21 | P |  | OUT |
| QL02408 | Perfluorohexanoic anhydride                                    | 308-13-4    | FC(F)F(C)F(F)C(F)F(C)F(C)F(C)F(C)F(C)F(C)F(C)F(C)F(C)F(C)F(C)F(C)F(C)F(C)F(C)F(C)F(C)F(C)F(C)F(C)F(C)F(C)F(C)F(C)F(C)F(C)F(C)F(C)F(C)F(C)F(C)F(C)F(C)F(C)F(C)F(C)F(C)F(C)F(C)F(C)F(C)F(C)F(C)F(C)F(C)F(C)F(C)F(C)F(C)F(C)F(C)F(C)F(C)F(C)F(C)F(C)F(C)F(C)F(C)F(C)F(C)F(C)F(C)F(C)F(C)F(C)F(C)F(C)F(C)F(C)F(C)F(C)F(C)F(C)F(C)F(C)F(C)F(C)F(C)F(C)F(C)F(C)F(C)F(C)F(C)F(C)F(C)F(C)F(C)F(C)F(C)F(C)F(C)F(C)F(C)F(C)F(C)F(C)F(C)F(C)F(C)F(C)F(C)F(C)F(C)F(C)F(C)F(C)F(C)F(C)F(C)F(C)F(C)F(C)F(C)F(C)F(C)F(C)F(C)F(C)F(C)F(C)F(C)F(C)F(C)F(C)F(C)F(C)F(C)F(C)F(C)F(C)F(C)F(C)F(C)F(C)F(C)F(C)F(C)F(C)F(C)F(C)F(C)F(C)F(C)F(C)F(C)F(C)F(C)F(C)F(C)F(C)F(C)F(C)F(C)F(C)F(C)F(C)F(C)F(C)F(C)F(C)F(C)F(C)F(C)F(C)F(C)F(C)F(C)F(C)F(C)F(C)F(C)F(C)F(C)F(C)F(C)F(C)F(C)F(C)F(C)F(C)F(C)F(C)F(C)F(C)F(C)F(C)F(C)F(C)F(C)F(C)F(C)F(C)F(C)F(C)F(C)F(C)F(C)F(C)F(C)F(C)F(C)F(C)F(C)F(C)F(C)F(C)F(C)F(C)F(C)F(C)F(C)F(C)F(C)F(C)F(C)F(C)F(C)F(C)F(C)F(C)F(C)F(C)F(C)F(C)F(C)F(C)F(C)F(C)F(C)F(C)F(C)F(C)F(C)F(C)F(C)F(C)F(C)F(C)F(C)F(C)F(C)F(C)F(C)F(C)F(C)F(C)F(C)F(C)F(C)F(C)F(C)F(C)F(C)F(C)F(C)F(C)F(C)F(C)F(C)F(C)F(C)F(C)F(C)F(C)F(C)F(C)F(C)F(C)F(C)F(C)F(C)F(C)F(C)F(C)F(C)F(C)F(C)F(C)F(C)F(C)F(C)F(C)F(C)F(C)F(C)F(C)F(C)F(C)F(C)F(C)F(C)F(C)F(C)F(C)F(C)F(C)F(C)F(C)F(C)F(C)F(C)F(C)F(C)F(C)F(C)F(C)F(C)F(C)F(C)F(C)F(C)F(C)F(C)F(C)F(C)F(C)F(C)F(C)F(C)F(C)F(C)F(C)F(C)F(C)F(C)F(C)F(C)F(C)F(C)F(C)F(C)F(C)F(C)F(C)F(C)F(C)F(C)F(C)F(C)F(C)F(C)F(C)F(C)F(C)F(C)F(C)F(C)F(C)F(C)F(C)F(C)F(C)F(C)F(C)F(C)F(C)F(C)F(C)F(C)F(C)F(C)F(C)F(C)F(C)F(C)F(C)F(C)F(C)F(C)F(C)F(C)F(C)F(C)F(C)F(C)F(C)F(C)F(C)F(C)F(C)F(C)F(C)F(C)F(C)F(C)F(C)F(C)F(C)F(C)F(C)F(C)F(C)F(C)F(C)F(C)F(C)F(C)F(C)F(C)F(C)F(C)F(C)F(C)F(C)F(C)F(C)F(C)F(C)F(C)F(C)F(C)F(C)F(C)F(C)F(C)F(C)F(C)F(C)F(C)F(C)F(C)F(C)F(C)F(C)F(C)F(C)F(C)F(C)F(C)F(C)F(C)F(C)F(C)F(C)F(C)F(C)F(C)F(C)F(C)F(C)F(C)F(C)F(C)F(C)F(C)F(C)F(C)F(C)F(C)F(C)F(C)F(C)F(C)F(C)F(C)F(C)F(C)F(C)F(C)F(C)F(C)F(C)F(C)F(C)F(C)F(C)F(C)F(C)F(C)F(C)F(C)F(C)F(C)F(C)F(C)F(C)F(C)F(C)F(C)F(C)F(C)F(C)F(C)F(C)F(C)F(C)F(C)F(C)F(C)F(C)F(C)F(C)F(C)F(C)F(C)F(C)F(C)F(C)F(C)F(C)F(C)F(C)F(C)F(C)F(C)F(C)F(C)F(C)F(C)F(C)F(C)F(C)F(C)F(C)F(C)F(C)F(C)F(C)F(C)F(C)F(C)F(C)F(C)F(C)F(C)F(C)F(C)F(C)F(C)F(C)F(C)F(C)F(C)F(C)F(C)F(C)F(C)F(C)F(C)F(C)F(C)F(C)F(C)F(C)F(C)F(C)F(C)F(C)F(C)F(C)F(C)F(C)F(C)F(C)F(C)F(C)F(C)F(C)F(C)F(C)F(C)F(C)F(C)F(C)F(C)F(C)F(C)F(C)F(C)F(C)F(C)F(C)F(C)F(C)F(C)F(C)F(C)F(C)F(C)F(C)F(C)F(C)F(C)F(C)F(C)F(C)F(C)F(C)F(C)F(C)F(C)F(C)F(C)F(C)F(C)F(C)F(C)F(C)F(C)F(C)F(C)F(C)F(C)F(C)F(C)F(C)F(C)F(C)F(C)F(C)F(C)F(C)F(C)F(C)F(C)F(C)F(C)F(C)F(C)F(C)F(C)F(C)F(C)F(C)F(C)F(C)F(C)F(C)F(C)F(C)F(C)F(C)F(C)F(C)F(C)F(C)F(C)F(C)F(C)F(C)F(C)F(C)F(C)F(C)F(C)F(C)F(C)F(C)F(C)F(C)F(C)F(C)F(C)F(C)F(C)F(C)F(C)F(C)F(C)F(C)F(C)F(C)F(C)F(C)F(C)F(C)F(C)F(C)F(C)F(C)F(C)F(C)F(C)F(C)F(C)F(C)F(C)F(C)F(C)F(C)F(C)F(C)F(C)F(C)F(C)F(C)F(C)F(C)F(C)F(C)F(C)F(C)F(C)F(C)F(C)F(C)F(C)F(C)F(C)F(C)F(C)F(C)F(C)F(C)F(C)F(C)F(C)F(C)F(C)F(C)F(C)F(C)F(C)F(C)F(C)F(C)F(C)F(C)F(C)F(C)F(C)F(C)F(C)F(C)F(C)F(C)F(C)F(C)F(C)F(C)F(C)F(C)F(C)F(C)F(C)F(C)F(C)F(C)F(C)F(C)F(C)F(C)F(C)F(C)F(C)F(C)F(C)F(C)F(C)F(C)F(C)F(C)F(C)F(C)F(C)F(C)F(C)F(C)F(C)F(C)F(C)F(C)F(C)F(C)F(C)F(C)F(C)F(C)F(C)F(C)F(C)F(C)F(C)F(C)F(C)F(C)F(C)F(C)F(C)F(C)F(C)F(C)F(C)F(C)F(C)F(C)F(C)F(C)F(C)F(C)F(C)F(C)F(C)F(C)F(C)F(C)F(C)F(C)F(C)F(C)F(C)F(C)F(C)F(C)F(C)F(C)F(C)F(C)F(C)F(C)F(C)F(C)F(C)F(C)F(C)F(C)F(C)F(C)F(C)F(C)F(C)F(C)F(C)F(C)F(C)F(C)F(C)F(C)F(C)F(C)F(C)F(C)F(C)F(C)F(C)F(C)F(C)F(C)F(C)F(C)F(C)F(C)F(C)F(C)F(C)F(C)F(C)F(C)F(C)F(C)F(C)F(C)F(C)F(C)F(C)F(C)F(C)F(C)F(C)F(C)F(C)F(C)F(C)F(C)F(C)F(C)F(C)F(C)F(C)F(C)F(C)F(C)F(C)F(C)F(C)F(C)F(C)F(C)F(C)F(C)F(C)F(C)F(C)F(C)F(C)F(C)F(C)F(C)F(C)F(C)F(C)F(C)F(C)F(C)F(C)F(C)F(C)F(C)F(C)F(C)F(C)F(C)F(C)F(C)F(C)F(C)F(C)F(C)F(C)F(C)F(C)F(C)F(C)F(C)F(C)F(C)F(C)F(C)F(C)F(C)F(C)F(C)F(C)F(C)F(C)F(C)F(C)F(C)F(C)F(C)F(C)F(C)F(C)F(C)F(C)F(C)F(C)F(C)F(C)F(C)F(C)F(C)F(C)F(C)F(C)F(C)F(C)F(C)F(C)F(C)F(C)F(C)F(C)F(C)F(C)F(C)F(C)F(C)F(C)F(C)F(C)F(C)F(C)F(C)F(C)F(C)F(C)F(C)F(C)F(C)F(C)F(C)F(C)F(C)F(C)F(C)F(C)F(C)F(C)F(C)F(C)F(C)F(C)F(C)F(C)F(C)F(C)F(C)F(C)F(C)F(C)F(C)F(C)F(C)F(C)F(C)F(C)F(C)F(C)F(C)F(C)F(C)F(C)F(C)F(C)F(C)F(C)F(C)F(C)F(C)F(C)F(C)F(C)F(C)F(C)F(C)F(C)F(C)F(C)F(C)F(C)F(C)F(C)F(C)F(C)F(C)F(C)F(C)F(C)F(C)F(C)F(C)F(C)F(C)F(C)F(C)F(C)F(C)F(C)F(C)F(C)F(C)F(C)F(C)F(C)F(C)F(C)F(C)F(C)F(C)F(C)F(C)F(C)F(C)F(C)F(C)F(C)F(C)F(C)F(C)F(C)F(C)F(C)F(C)F(C)F(C)F(C)F(C)F(C)F(C)F(C)F(C)F(C)F(C)F(C)F(C)F(C)F(C)F(C)F(C)F(C)F(C)F(C)F(C)F(C)F(C)F(C)F(C)F(C)F(C)F(C)F(C)F(C)F(C)F(C)F(C)F(C)F(C)F(C)F(C)F(C)F(C)F(C)F(C)F(C)F(C)F(C)F(C)F(C)F(C)F(C)F(C)F(C)F(C)F(C)F(C)F(C)F(C)F(C)F(C)F(C)F(C)F(C)F(C)F(C)F(C)F(C)F(C)F(C)F(C)F(C)F(C)F(C)F(C)F(C)F(C)F(C)F(C)F(C)F(C)F(C)F(C)F(C)F(C)F(C)F(C)F(C)F(C)F(C)F(C)F(C)F(C)F(C)F(C)F(C)F(C)F(C)F(C)F(C)F(C)F(C)F(C)F(C)F(C)F(C)F(C)F(C)F(C)F(C)F(C)F(C)F(C)F(C)F(C)F(C)F(C)F(C)F(C)F(C)F(C)F(C)F(C)F(C)F(C)F(C)F(C)F(C)F(C)F(C)F(C)F(C)F(C)F(C)F(C)F(C)F(C)F(C)F(C)F(C)F(C)F(C)F(C)F(C)F(C)F(C)F(C)F(C)F(C)F(C)F(C)F(C)F(C)F(C)F(C)F(C)F(C)F(C)F(C)F(C)F(C)F(C)F(C)F(C)F(C)F(C)F(C)F(C)F(C)F(C)F(C)F(C)F(C)F(C)F(C)F(C)F(C)F(C)F(C)F(C)F(C)F(C)F(C)F(C)F(C)F(C)F(C)F(C)F(C)F(C)F(C)F(C)F(C)F(C)F(C)F(C)F(C)F(C)F(C)F(C)F(C)F(C)F(C)F(C)F(C)F(C)F(C)F(C)F(C)F(C)F(C)F(C)F(C)F(C)F(C)F(C)F(C)F(C)F(C)F(C)F(C)F(C)F(C)F(C)F(C)F(C)F(C)F(C)F(C)F(C)F(C)F(C)F(C)F(C)F(C)F(C)F(C)F(C)F(C)F(C)F(C)F(C)F(C)F(C)F(C)F(C)F(C)F(C)F(C)F(C)F(C)F(C)F(C)F(C)F(C)F(C)F(C)F(C)F(C)F(C)F(C)F(C)F(C)F(C)F(C)F(C)F(C)F(C)F(C)F(C)F(C)F(C)F(C)F(C)F(C)F(C)F(C)F(C)F(C)F(C)F(C)F(C)F(C)F(C)F(C)F(C)F(C)F(C)F(C)F(C)F(C)F(C)F(C)F(C)F(C)F(C)F(C)F(C)F(C)F(C)F(C)F(C)F(C)F(C)F(C)F(C)F(C)F(C)F(C)F(C)F(C)F(C)F(C)F(C)F(C)F(C)F(C)F(C)F(C)F(C)F(C)F(C)F(C)F(C)F(C)F(C)F(C)F(C)F(C)F(C)F(C)F(C)F(C)F(C)F(C)F(C)F(C)F(C)F(C)F(C)F(C)F(C)F(C)F(C)F(C)F(C)F(C)F(C)F(C)F(C)F(C)F(C)F(C)F(C)F(C)F(C)F(C)F(C)F(C)F(C)F(C)F(C)F(C)F(C)F(C)F(C)F(C)F(C)F(C)F(C)F(C)F(C)F(C)F(C)F(C)F(C)F(C)F(C)F(C)F(C)F(C)F(C)F(C)F(C)F(C)F(C)F(C)F(C)F(C)F(C)F(C)F(C)F(C)F(C)F(C)F(C)F(C)F(C)F(C)F(C)F(C)F(C)F(C)F(C)F(C)F(C)F(C)F(C)F(C)F(C)F(C)F(C)F(C)F(C)F(C)F(C)F(C)F(C)F(C)F(C)F(C)F(C)F(C)F(C)F(C)F(C)F(C)F(C)F(C)F(C)F(C)F(C)F(C)F(C)F(C)F(C)F(C)F(C)F(C)F(C)F(C)F(C)F(C)F(C)F(C)F(C)F(C)F(C)F(C)F(C)F(C)F(C)F(C)F(C)F(C)F(C)F(C)F(C)F(C)F(C)F(C)F(C)F(C)F(C)F(C)F(C)F(C)F(C)F(C)F(C)F(C)F(C)F(C)F(C)F(C)F(C)F(C)F(C)F(C)F(C)F(C)F(C)F(C)F(C)F(C)F(C)F(C)F(C)F(C)F(C)F(C)F(C)F(C)F(C)F(C)F(C)F(C)F(C)F(C)F(C)F(C)F(C)F(C)F(C)F(C)F(C)F(C)F(C)F(C)F(C)F(C)F(C)F(C)F(C)F(C)F(C)F(C)F(C)F(C)F(C)F(C)F(C)F(C)F(C)F(C)F(C)F(C)F(C)F(C)F(C)F(C)F(C)F(C)F(C)F(C)F(C)F(C)F(C)F(C)F(C)F(C)F(C)F(C)F(C)F(C)F(C)F(C)F(C)F(C)F(C)F(C)F(C)F(C)F(C)F(C)F(C)F(C)F(C)F(C)F(C)F(C)F(C)F(C)F(C)F(C)F(C)F(C)F(C)F(C)F(C)F(C)F(C)F(C)F(C)F(C)F(C)F(C)F(C)F(C)F(C)F(C)F(C)F(C)F(C)F(C)F(C)F(C)F(C)F(C)F(C)F(C)F(C)F(C)F(C)F(C)F(C)F(C)F(C)F(C)F(C)F(C)F(C)F(C)F(C)F(C)F(C)F(C)F(C)F(C)F(C)F(C)F(C)F(C)F(C)F(C)F(C)F(C)F(C)F(C)F(C)F(C)F(C)F(C)F(C)F(C)F(C)F(C)F(C)F(C)F(C)F(C)F(C)F(C)F(C)F(C)F(C)F(C)F(C)F(C)F(C)F(C)F(C)F(C)F(C)F(C)F(C)F(C)F(C)F(C)F(C)F(C)F(C)F(C)F(C)F(C)F(C)F(C)F(C)F(C)F(C)F(C)F(C)F(C)F(C)F(C)F(C)F(C)F(C)F(C)F(C)F(C)F(C)F(C)F(C)F(C)F(C)F(C)F(C)F(C)F(C)F(C)F(C)F(C)F(C)F(C)F(C)F(C)F(C)F(C)F(C)F(C)F(C)F(C)F(C)F(C)F(C)F(C)F(C)F(C)F(C)F(C)F(C)F(C)F(C)F(C)F(C)F(C)F(C)F(C)F(C)F(C)F(C)F(C)F(C)F(C)F(C)F(C)F(C)F(C)F(C)F(C)F(C)F(C)F(C)F(C)F(C)F(C)F(C)F(C)F(C)F(C)F(C)F(C)F(C)F(C)F(C)F(C)F(C)F(C)F(C)F(C)F(C)F(C)F(C)F(C)F(C)F(C)F(C)F(C)F(C)F(C)F(C)F(C)F(C)F(C)F(C)F(C)F(C)F(C)F(C)F(C)F(C)F(C)F(C)F(C)F(C)F(C)F(C)F(C)F(C)F(C)F(C)F(C)F(C)F(C)F(C)F(C)F(C)F(C)F(C)F(C)F(C)F(C)F(C)F(C)F(C)F(C)F(C)F(C)F(C)F(C)F(C)F(C)F(C)F(C)F(C)F(C)F(C)F(C)F(C)F(C)F(C)F(C)F(C)F(C)F(C)F(C)F(C)F(C)F(C)F(C)F(C)F(C)F(C)F(C)F(C)F(C)F(C)F(C)F(C)F(C)F(C)F(C)F(C)F(C)F(C)F(C)F(C)F(C)F(C)F(C)F(C)F(C)F(C)F(C)F(C)F(C)F(C)F(C)F(C)F(C)F(C)F(C)F(C)F(C)F(C)F(C)F(C)F(C)F(C)F(C)F(C)F(C)F(C)F(C)F(C)F(C)F(C)F(C)F(C)F(C)F(C)F(C)F(C)F(C)F(C)F(C)F(C)F(C)F(C)F(C)F(C)F(C)F(C)F(C)F(C)F(C)F(C)F(C)F(C)F(C)F(C)F(C)F(C)F(C)F(C)F(C)F(C)F(C)F(C)F(C)F(C)F(C)F(C)F(C)F(C)F(C)F(C)F(C)F(C)F(C)F(C)F(C)F(C)F(C)F(C)F(C)F(C)F(C)F(C)F(C)F(C)F(C)F(C)F(C)F(C)F(C)F(C)F(C)F(C)F(C)F(C)F(C)F(C)F(C)F(C)F(C)F(C)F(C)F(C)F(C)F(C)F(C)F(C)F(C)F(C)F(C)F(C)F(C)F(C)F(C)F(C)F(C)F(C)F(C)F(C)F(C)F(C)F(C)F(C)F(C)F(C)F(C)F(C)F(C)F(C)F(C)F(C)F(C)F(C)F(C)F(C)F(C)F(C)F(C)F(C)F(C)F(C)F(C)F(C)F(C)F(C)F(C)F(C)F(C)F(C)F(C)F(C)F(C)F(C)F(C)F(C)F(C)F(C)F(C)F(C)F(C)F(C)F(C)F(C)F(C)F(C)F(C)F(C)F(C)F(C)F(C)F(C)F(C)F(C)F(C)F(C)F(C)F(C)F(C)F(C)F(C)F(C)F(C)F(C)F(C)F(C)F(C)F(C)F(C)F(C)F(C)F(C)F(C)F(C)F(C)F(C)F(C)F(C)F(C)F(C)F(C)F(C)F(C)F(C)F(C)F(C)F(C)F(C)F(C)F(C)F(C)F(C)F(C)F(C)F(C)F(C)F(C)F(C)F(C)F(C)F(C)F(C)F(C)F(C)F(C)F(C)F(C)F(C)F(C)F(C)F(C)F(C)F(C)F(C)F(C)F(C)F(C)F(C)F(C)F(C)F(C)F(C)F(C)F(C)F(C)F(C)F(C)F(C)F(C)F(C)F(C)F(C)F(C)F(C)F(C)F(C)F(C)F(C)F(C)F(C)F(C)F(C)F(C)F(C)F(C)F(C)F(C)F(C)F(C)F(C)F(C)F(C)F(C)F(C)F(C)F(C)F(C)F(C)F(C)F(C)F(C)F(C)F(C)F(C)F(C)F(C)F(C)F(C)F(C)F(C)F(C)F(C)F(C)F(C)F(C)F(C)F(C)F(C)F(C)F(C)F(C)F(C)F(C)F(C)F(C)F(C)F(C)F(C)F(C)F(C)F(C)F(C)F(C)F(C)F(C)F(C)F(C)F(C)F(C)F(C)F(C)F(C)F(C)F(C)F(C)F(C)F(C)F(C)F(C)F(C)F(C)F(C)F(C)F(C)F(C)F(C)F(C)F(C)F(C)F(C)F(C)F(C)F(C)F(C)F(C)F(C)F(C)F(C)F(C)F(C)F(C)F(C)F(C)F(C)F(C)F(C)F(C)F(C)F(C)F(C)F(C)F(C)F(C)F(C)F(C)F(C)F(C)F(C)F(C)F(C)F(C)F(C)F(C)F(C)F(C)F(C)F(C)F(C)F(C)F(C)F(C)F(C)F(C)F(C)F(C)F(C)F(C)F(C)F(C)F(C)F(C)F(C)F(C)F(C)F(C)F(C)F(C)F(C)F(C)F(C)F(C)F(C)F(C)F(C)F(C)F(C)F(C)F(C)F(C)F(C)F(C)F(C)F(C)F(C)F(C)F(C)F(C)F(C)F(C)F(C)F(C)F(C)F(C)F(C)F(C)F(C)F(C)F(C)F(C)F(C)F(C)F(C)F(C)F(C)F(C)F(C)F(C)F(C)F(C)F(C)F(C)F(C)F(C)F(C)F(C)F(C)F(C)F(C)F(C)F(C)F(C)F(C)F(C)F(C)F(C)F(C)F(C)F(C)F(C)F(C)F(C)F(C)F(C)F(C)F(C)F(C)F(C)F(C)F(C)F(C)F(C)F(C)F(C)F(C)F(C)F(C)F(C)F(C)F(C)F(C)F(C)F(C)F(C)F(C)F(C)F(C)F(C)F(C)F(C)F(C)F(C)F(C)F(C)F(C)F(C)F(C)F(C)F(C)F(C)F(C)F(C)F(C)F(C)F(C)F(C)F(C)F(C)F(C)F(C)F(C)F(C)F(C)F(C)F(C)F(C)F(C)F(C)F(C)F(C)F(C)F(C)F(C)F(C)F(C)F(C)F(C)F(C)F(C)F(C)F(C)F(C)F(C)F(C)F(C)F(C)F(C)F(C)F(C)F(C)F(C)F(C)F(C)F(C)F(C)F(C)F(C)F(C)F(C)F(C)F(C)F(C)F(C)F(C)F(C)F(C)F(C)F(C)F(C)F(C)F(C)F(C)F(C)F(C)F(C)F(C)F(C)F(C)F(C)F(C)F(C)F(C)F(C)F(C)F(C)F(C)F(C)F(C)F(C)F(C)F(C)F(C)F(C)F(C)F(C)F(C)F(C)F(C)F(C)F(C)F(C)F(C)F(C)F(C)F(C)F(C)F(C)F(C)F(C)F(C)F(C)F(C)F(C)F(C)F(C)F(C)F(C)F(C)F(C)F(C)F(C)F(C)F(C)F(C)F(C)F(C)F(C)F(C)F(C)F(C)F(C)F(C)F(C)F(C)F(C)F(C)F(C)F(C)F(C)F(C)F(C)F(C)F(C)F(C)F(C)F(C)F(C)F(C)F(C)F(C)F(C)F(C)F(C)F(C)F(C)F(C)F(C)F(C)F(C)F(C)F(C)F(C)F(C)F(C)F(C)F(C)F(C)F(C)F(C)F(C)F(C)F(C)F(C)F(C)F(C)F(C)F(C)F(C)F(C)F(C)F(C)F(C)F(C)F(C)F(C)F(C)F(C)F(C)F(C)F(C)F(C)F(C)F(C)F(C)F(C)F(C)F(C)F(C)F(C)F(C)F(C)F(C)F(C)F(C)F(C)F(C)F(C)F(C)F(C)F(C)F(C)F(C)F(C)F(C)F(C)F(C)F(C)F(C)F(C)F(C)F(C)F(C)F(C)F(C)F(C)F(C)F(C)F(C)F(C)F(C)F(C)F(C)F(C)F(C)F(C)F(C)F(C)F(C)F(C)F(C)F(C)F(C)F(C)F(C)F(C)F(C)F(C)F(C)F(C)F(C)F(C)F(C)F(C)F(C)F(C)F(C)F(C)F(C)F(C)F(C)F(C)F(C)F(C)F(C)F(C)F(C)F(C)F(C)F(C)F(C)F(C)F(C)F(C)F(C)F(C)F(C)F(C)F(C)F(C)F(C)F(C)F(C)F(C)F(C)F(C)F(C)F(C)F(C)F(C)F(C)F(C)F(C)F(C)F(C)F(C)F(C)F(C)F(C)F(C)F(C)F(C)F(C)F(C)F(C)F(C)F(C)F(C)F(C)F(C)F(C)F(C)F(C)F(C)F(C)F(C)F(C)F(C)F(C)F(C)F(C)F(C)F(C)F(C)F(C)F(C)F(C)F(C)F(C)F(C)F(C)F(C)F(C)F(C)F(C)F(C)F(C)F(C)F(C)F(C)F(C)F(C)F(C)F(C)F(C)F(C)F(C)F(C)F(C)F(C)F(C)F(C)F(C)F(C)F(C)F(C)F(C)F(C)F(C)F(C)F(C)F(C)F(C)F(C)F(C)F(C)F(C)F(C)F(C)F(C)F(C)F(C)F(C)F(C)F(C)F(C)F(C)F(C)F(C)F(C)F(C)F(C)F(C)F(C)F(C)F(C)F(C)F(C)F(C)F(C)F(C)F(C)F(C)F(C)F(C)F(C)F(C)F(C)F(C)F(C)F(C)F(C)F(C)F(C)F(C)F(C)F(C)F(C)F(C)F(C)F(C)F(C)F(C |       |       |      |   |  |     |



[illegible]



[illegible]







[illegible]



[illegible]



[illegible]



[illegible]



[illegible]



[illegible]



|         |                                                                |              |                                                                                                                                                                                                                                                                                                                                                                                                                                                                                                                                                                                                                                                                                                                                                                                                                                                                                                                                                                                                                                                                                                                                                                                                                                                                                                                                                                                                                                                                                                                                                                                                                                                                                                                                                                                                                                                                                                                                                                                                                                                                                                                                                                                                                                                                                                                                                                                                                                                                                                                                                                                                                                                                                                                                                                                                                                                                                                                                                                                                                                                                                                                                                                                                                                                                                                                                                                                                                                                                                                                                                                                                                                                                                                                                                                                                                                                                                                                                                                                                                                                                                                                                                                                                                                                                                                                                                                                                                                                                                                                                                                                                                                                                                                                                                                                                                                                                                                                                                                                                                                                                                                                                                                                                                                                                                                                                                                                                                                                                                                                                                                                                                                                                                                                                                                                                                                                                                                                                  |        |       |      |   |     |
|---------|----------------------------------------------------------------|--------------|----------------------------------------------------------------------------------------------------------------------------------------------------------------------------------------------------------------------------------------------------------------------------------------------------------------------------------------------------------------------------------------------------------------------------------------------------------------------------------------------------------------------------------------------------------------------------------------------------------------------------------------------------------------------------------------------------------------------------------------------------------------------------------------------------------------------------------------------------------------------------------------------------------------------------------------------------------------------------------------------------------------------------------------------------------------------------------------------------------------------------------------------------------------------------------------------------------------------------------------------------------------------------------------------------------------------------------------------------------------------------------------------------------------------------------------------------------------------------------------------------------------------------------------------------------------------------------------------------------------------------------------------------------------------------------------------------------------------------------------------------------------------------------------------------------------------------------------------------------------------------------------------------------------------------------------------------------------------------------------------------------------------------------------------------------------------------------------------------------------------------------------------------------------------------------------------------------------------------------------------------------------------------------------------------------------------------------------------------------------------------------------------------------------------------------------------------------------------------------------------------------------------------------------------------------------------------------------------------------------------------------------------------------------------------------------------------------------------------------------------------------------------------------------------------------------------------------------------------------------------------------------------------------------------------------------------------------------------------------------------------------------------------------------------------------------------------------------------------------------------------------------------------------------------------------------------------------------------------------------------------------------------------------------------------------------------------------------------------------------------------------------------------------------------------------------------------------------------------------------------------------------------------------------------------------------------------------------------------------------------------------------------------------------------------------------------------------------------------------------------------------------------------------------------------------------------------------------------------------------------------------------------------------------------------------------------------------------------------------------------------------------------------------------------------------------------------------------------------------------------------------------------------------------------------------------------------------------------------------------------------------------------------------------------------------------------------------------------------------------------------------------------------------------------------------------------------------------------------------------------------------------------------------------------------------------------------------------------------------------------------------------------------------------------------------------------------------------------------------------------------------------------------------------------------------------------------------------------------------------------------------------------------------------------------------------------------------------------------------------------------------------------------------------------------------------------------------------------------------------------------------------------------------------------------------------------------------------------------------------------------------------------------------------------------------------------------------------------------------------------------------------------------------------------------------------------------------------------------------------------------------------------------------------------------------------------------------------------------------------------------------------------------------------------------------------------------------------------------------------------------------------------------------------------------------------------------------------------------------------------------------------------------------------------------------|--------|-------|------|---|-----|
| QL02930 | 2-(Nonafluorobutyl)-4H-1-benzopyran-4-one                      | 304877-96-1  | F(C(F)(F)(C(F)(F)(C(F)(F)(C(F)(F)C1=CC(=O)c2ccccc2O1                                                                                                                                                                                                                                                                                                                                                                                                                                                                                                                                                                                                                                                                                                                                                                                                                                                                                                                                                                                                                                                                                                                                                                                                                                                                                                                                                                                                                                                                                                                                                                                                                                                                                                                                                                                                                                                                                                                                                                                                                                                                                                                                                                                                                                                                                                                                                                                                                                                                                                                                                                                                                                                                                                                                                                                                                                                                                                                                                                                                                                                                                                                                                                                                                                                                                                                                                                                                                                                                                                                                                                                                                                                                                                                                                                                                                                                                                                                                                                                                                                                                                                                                                                                                                                                                                                                                                                                                                                                                                                                                                                                                                                                                                                                                                                                                                                                                                                                                                                                                                                                                                                                                                                                                                                                                                                                                                                                                                                                                                                                                                                                                                                                                                                                                                                                                                                                                             | -10.37 | 31.03 | 6.61 | P | OUT |
| QL02931 | 6-(Nonafluorobutyl)-2-phenylpyrimidin-4(3H)-one                | 180748-44-1  | F(C(F)(F)(C(F)(F)(C(F)(F)(C(F)(F)C1=Cc1ccccc1C1cccc1                                                                                                                                                                                                                                                                                                                                                                                                                                                                                                                                                                                                                                                                                                                                                                                                                                                                                                                                                                                                                                                                                                                                                                                                                                                                                                                                                                                                                                                                                                                                                                                                                                                                                                                                                                                                                                                                                                                                                                                                                                                                                                                                                                                                                                                                                                                                                                                                                                                                                                                                                                                                                                                                                                                                                                                                                                                                                                                                                                                                                                                                                                                                                                                                                                                                                                                                                                                                                                                                                                                                                                                                                                                                                                                                                                                                                                                                                                                                                                                                                                                                                                                                                                                                                                                                                                                                                                                                                                                                                                                                                                                                                                                                                                                                                                                                                                                                                                                                                                                                                                                                                                                                                                                                                                                                                                                                                                                                                                                                                                                                                                                                                                                                                                                                                                                                                                                                             | -10.38 | 27.27 | 6.65 | P | OUT |
| QL02932 | 6-(Nonafluorobutyl)-2-sulfanylidene-2,3-dihdropyrimidin-4(1    | 1426894-99-6 | F(C(F)(F)(C(F)(F)(C(F)(F)(C(F)(F)C1=CC(=O)NC(=S)N1                                                                                                                                                                                                                                                                                                                                                                                                                                                                                                                                                                                                                                                                                                                                                                                                                                                                                                                                                                                                                                                                                                                                                                                                                                                                                                                                                                                                                                                                                                                                                                                                                                                                                                                                                                                                                                                                                                                                                                                                                                                                                                                                                                                                                                                                                                                                                                                                                                                                                                                                                                                                                                                                                                                                                                                                                                                                                                                                                                                                                                                                                                                                                                                                                                                                                                                                                                                                                                                                                                                                                                                                                                                                                                                                                                                                                                                                                                                                                                                                                                                                                                                                                                                                                                                                                                                                                                                                                                                                                                                                                                                                                                                                                                                                                                                                                                                                                                                                                                                                                                                                                                                                                                                                                                                                                                                                                                                                                                                                                                                                                                                                                                                                                                                                                                                                                                                                               | -8.89  | 37.50 | 5.86 | P | IN  |
| QL02933 | 9-(Nonafluorobutyl)-2,3,6,7-tetrahydro-1H,5H,11H-pyrano[2,     | 355822-08-1  | F(C(F)(F)(C(F)(F)(C(F)(F)(C(F)(F)C1=CC(=O)Oc2c3CCCC4CCC(cc12)c34                                                                                                                                                                                                                                                                                                                                                                                                                                                                                                                                                                                                                                                                                                                                                                                                                                                                                                                                                                                                                                                                                                                                                                                                                                                                                                                                                                                                                                                                                                                                                                                                                                                                                                                                                                                                                                                                                                                                                                                                                                                                                                                                                                                                                                                                                                                                                                                                                                                                                                                                                                                                                                                                                                                                                                                                                                                                                                                                                                                                                                                                                                                                                                                                                                                                                                                                                                                                                                                                                                                                                                                                                                                                                                                                                                                                                                                                                                                                                                                                                                                                                                                                                                                                                                                                                                                                                                                                                                                                                                                                                                                                                                                                                                                                                                                                                                                                                                                                                                                                                                                                                                                                                                                                                                                                                                                                                                                                                                                                                                                                                                                                                                                                                                                                                                                                                                                                 | -13.66 | 20.00 | 8.26 | P | OUT |
| QL02934 | Benzene, (nonafluorobutyl)-                                    | 2398-75-6    | F(C(F)(F)(C(F)(F)(C(F)(F)(C(F)(F)C1=CC=CC=C1                                                                                                                                                                                                                                                                                                                                                                                                                                                                                                                                                                                                                                                                                                                                                                                                                                                                                                                                                                                                                                                                                                                                                                                                                                                                                                                                                                                                                                                                                                                                                                                                                                                                                                                                                                                                                                                                                                                                                                                                                                                                                                                                                                                                                                                                                                                                                                                                                                                                                                                                                                                                                                                                                                                                                                                                                                                                                                                                                                                                                                                                                                                                                                                                                                                                                                                                                                                                                                                                                                                                                                                                                                                                                                                                                                                                                                                                                                                                                                                                                                                                                                                                                                                                                                                                                                                                                                                                                                                                                                                                                                                                                                                                                                                                                                                                                                                                                                                                                                                                                                                                                                                                                                                                                                                                                                                                                                                                                                                                                                                                                                                                                                                                                                                                                                                                                                                                                     | -8.35  | 37.50 | 5.60 | P | IN  |
| QL02935 | 2-(Nonafluorobutyl)-1H-indene                                  | 1608112-37-3 | F(C(F)(F)(C(F)(F)(C(F)(F)(C(F)(F)C1=Cc2ccccc2C1                                                                                                                                                                                                                                                                                                                                                                                                                                                                                                                                                                                                                                                                                                                                                                                                                                                                                                                                                                                                                                                                                                                                                                                                                                                                                                                                                                                                                                                                                                                                                                                                                                                                                                                                                                                                                                                                                                                                                                                                                                                                                                                                                                                                                                                                                                                                                                                                                                                                                                                                                                                                                                                                                                                                                                                                                                                                                                                                                                                                                                                                                                                                                                                                                                                                                                                                                                                                                                                                                                                                                                                                                                                                                                                                                                                                                                                                                                                                                                                                                                                                                                                                                                                                                                                                                                                                                                                                                                                                                                                                                                                                                                                                                                                                                                                                                                                                                                                                                                                                                                                                                                                                                                                                                                                                                                                                                                                                                                                                                                                                                                                                                                                                                                                                                                                                                                                                                  | -9.91  | 31.03 | 6.39 | P | OUT |
| QL02936 | SCHMBL1270621                                                  | 58671-28-6   | F(C(F)(F)(C(F)(F)(C(F)(F)(C(F)(F)C1=CN(C(=O)NC1=O                                                                                                                                                                                                                                                                                                                                                                                                                                                                                                                                                                                                                                                                                                                                                                                                                                                                                                                                                                                                                                                                                                                                                                                                                                                                                                                                                                                                                                                                                                                                                                                                                                                                                                                                                                                                                                                                                                                                                                                                                                                                                                                                                                                                                                                                                                                                                                                                                                                                                                                                                                                                                                                                                                                                                                                                                                                                                                                                                                                                                                                                                                                                                                                                                                                                                                                                                                                                                                                                                                                                                                                                                                                                                                                                                                                                                                                                                                                                                                                                                                                                                                                                                                                                                                                                                                                                                                                                                                                                                                                                                                                                                                                                                                                                                                                                                                                                                                                                                                                                                                                                                                                                                                                                                                                                                                                                                                                                                                                                                                                                                                                                                                                                                                                                                                                                                                                                                | -8.89  | 37.50 | 5.86 | P | IN  |
| QL02937 | 4-(Nonafluorobutyl)-1,3-dihydro-2H-1,5-benzodiazepin-2-one     | 96146-12-2   | F(C(F)(F)(C(F)(F)(C(F)(F)(C(F)(F)C1=Nc2ccccc2NC(=O)C1                                                                                                                                                                                                                                                                                                                                                                                                                                                                                                                                                                                                                                                                                                                                                                                                                                                                                                                                                                                                                                                                                                                                                                                                                                                                                                                                                                                                                                                                                                                                                                                                                                                                                                                                                                                                                                                                                                                                                                                                                                                                                                                                                                                                                                                                                                                                                                                                                                                                                                                                                                                                                                                                                                                                                                                                                                                                                                                                                                                                                                                                                                                                                                                                                                                                                                                                                                                                                                                                                                                                                                                                                                                                                                                                                                                                                                                                                                                                                                                                                                                                                                                                                                                                                                                                                                                                                                                                                                                                                                                                                                                                                                                                                                                                                                                                                                                                                                                                                                                                                                                                                                                                                                                                                                                                                                                                                                                                                                                                                                                                                                                                                                                                                                                                                                                                                                                                            | -10.52 | 28.13 | 6.71 | P | OUT |
| QL02938 | 2-(Nonafluorobutyl)-1-benzofuran                               | 1608112-36-2 | F(C(F)(F)(C(F)(F)(C(F)(F)(C(F)(F)F1c1cc2ccccc2O1                                                                                                                                                                                                                                                                                                                                                                                                                                                                                                                                                                                                                                                                                                                                                                                                                                                                                                                                                                                                                                                                                                                                                                                                                                                                                                                                                                                                                                                                                                                                                                                                                                                                                                                                                                                                                                                                                                                                                                                                                                                                                                                                                                                                                                                                                                                                                                                                                                                                                                                                                                                                                                                                                                                                                                                                                                                                                                                                                                                                                                                                                                                                                                                                                                                                                                                                                                                                                                                                                                                                                                                                                                                                                                                                                                                                                                                                                                                                                                                                                                                                                                                                                                                                                                                                                                                                                                                                                                                                                                                                                                                                                                                                                                                                                                                                                                                                                                                                                                                                                                                                                                                                                                                                                                                                                                                                                                                                                                                                                                                                                                                                                                                                                                                                                                                                                                                                                 | -9.96  | 33.33 | 6.39 | P | OUT |
| QL02939 | 2-(Nonafluorobutyl)-1-benzothiophene                           | 1608112-38-4 | F(C(F)(F)(C(F)(F)(C(F)(F)(C(F)(F)F1c1cc2ccccc2S1                                                                                                                                                                                                                                                                                                                                                                                                                                                                                                                                                                                                                                                                                                                                                                                                                                                                                                                                                                                                                                                                                                                                                                                                                                                                                                                                                                                                                                                                                                                                                                                                                                                                                                                                                                                                                                                                                                                                                                                                                                                                                                                                                                                                                                                                                                                                                                                                                                                                                                                                                                                                                                                                                                                                                                                                                                                                                                                                                                                                                                                                                                                                                                                                                                                                                                                                                                                                                                                                                                                                                                                                                                                                                                                                                                                                                                                                                                                                                                                                                                                                                                                                                                                                                                                                                                                                                                                                                                                                                                                                                                                                                                                                                                                                                                                                                                                                                                                                                                                                                                                                                                                                                                                                                                                                                                                                                                                                                                                                                                                                                                                                                                                                                                                                                                                                                                                                                 | -9.96  | 33.33 | 6.39 | P | OUT |
| QL02940 | 4-(Nonafluorobutyl)benzene-1,2-dicarbonitrile                  | 1207299-71-5 | F(C(F)(F)(C(F)(F)(C(F)(F)(C(F)(F)F1c1ccc(#[N]c(c1)C#N                                                                                                                                                                                                                                                                                                                                                                                                                                                                                                                                                                                                                                                                                                                                                                                                                                                                                                                                                                                                                                                                                                                                                                                                                                                                                                                                                                                                                                                                                                                                                                                                                                                                                                                                                                                                                                                                                                                                                                                                                                                                                                                                                                                                                                                                                                                                                                                                                                                                                                                                                                                                                                                                                                                                                                                                                                                                                                                                                                                                                                                                                                                                                                                                                                                                                                                                                                                                                                                                                                                                                                                                                                                                                                                                                                                                                                                                                                                                                                                                                                                                                                                                                                                                                                                                                                                                                                                                                                                                                                                                                                                                                                                                                                                                                                                                                                                                                                                                                                                                                                                                                                                                                                                                                                                                                                                                                                                                                                                                                                                                                                                                                                                                                                                                                                                                                                                                            | -9.29  | 34.62 | 6.07 | P | OUT |
| QL02941 | 1-Ethenyl-4-(nonafluorobutyl)benzene                           | 159241-92-6  | F(C(F)(F)(C(F)(F)(C(F)(F)(C(F)(F)F1c1ccc(C=C)cc1                                                                                                                                                                                                                                                                                                                                                                                                                                                                                                                                                                                                                                                                                                                                                                                                                                                                                                                                                                                                                                                                                                                                                                                                                                                                                                                                                                                                                                                                                                                                                                                                                                                                                                                                                                                                                                                                                                                                                                                                                                                                                                                                                                                                                                                                                                                                                                                                                                                                                                                                                                                                                                                                                                                                                                                                                                                                                                                                                                                                                                                                                                                                                                                                                                                                                                                                                                                                                                                                                                                                                                                                                                                                                                                                                                                                                                                                                                                                                                                                                                                                                                                                                                                                                                                                                                                                                                                                                                                                                                                                                                                                                                                                                                                                                                                                                                                                                                                                                                                                                                                                                                                                                                                                                                                                                                                                                                                                                                                                                                                                                                                                                                                                                                                                                                                                                                                                                 | -8.78  | 32.14 | 5.85 | P | OUT |
| QL02942 | 4-(Nonafluorobutyl)benzonitrile                                | 137052-16-5  | F(C(F)(F)(C(F)(F)(C(F)(F)(C(F)(F)F1c1ccc(c1)C#N                                                                                                                                                                                                                                                                                                                                                                                                                                                                                                                                                                                                                                                                                                                                                                                                                                                                                                                                                                                                                                                                                                                                                                                                                                                                                                                                                                                                                                                                                                                                                                                                                                                                                                                                                                                                                                                                                                                                                                                                                                                                                                                                                                                                                                                                                                                                                                                                                                                                                                                                                                                                                                                                                                                                                                                                                                                                                                                                                                                                                                                                                                                                                                                                                                                                                                                                                                                                                                                                                                                                                                                                                                                                                                                                                                                                                                                                                                                                                                                                                                                                                                                                                                                                                                                                                                                                                                                                                                                                                                                                                                                                                                                                                                                                                                                                                                                                                                                                                                                                                                                                                                                                                                                                                                                                                                                                                                                                                                                                                                                                                                                                                                                                                                                                                                                                                                                                                  | -8.86  | 36.00 | 5.85 | P | IN  |
| QL02943 | 7-(Nonafluorobutyl)-1-benzothiophene                           | 1608112-40-8 | F(C(F)(F)(C(F)(F)(C(F)(F)(C(F)(F)F1c1cccc2ccsc12                                                                                                                                                                                                                                                                                                                                                                                                                                                                                                                                                                                                                                                                                                                                                                                                                                                                                                                                                                                                                                                                                                                                                                                                                                                                                                                                                                                                                                                                                                                                                                                                                                                                                                                                                                                                                                                                                                                                                                                                                                                                                                                                                                                                                                                                                                                                                                                                                                                                                                                                                                                                                                                                                                                                                                                                                                                                                                                                                                                                                                                                                                                                                                                                                                                                                                                                                                                                                                                                                                                                                                                                                                                                                                                                                                                                                                                                                                                                                                                                                                                                                                                                                                                                                                                                                                                                                                                                                                                                                                                                                                                                                                                                                                                                                                                                                                                                                                                                                                                                                                                                                                                                                                                                                                                                                                                                                                                                                                                                                                                                                                                                                                                                                                                                                                                                                                                                                 | -9.91  | 33.33 | 6.37 | P | OUT |
| QL02944 | Tetrahydro(perfluorobutyl)furan                                | 26446-99-3   | F(C(F)(F)(C(F)(F)(C(F)(F)(C(F)(F)C1CCCCO1                                                                                                                                                                                                                                                                                                                                                                                                                                                                                                                                                                                                                                                                                                                                                                                                                                                                                                                                                                                                                                                                                                                                                                                                                                                                                                                                                                                                                                                                                                                                                                                                                                                                                                                                                                                                                                                                                                                                                                                                                                                                                                                                                                                                                                                                                                                                                                                                                                                                                                                                                                                                                                                                                                                                                                                                                                                                                                                                                                                                                                                                                                                                                                                                                                                                                                                                                                                                                                                                                                                                                                                                                                                                                                                                                                                                                                                                                                                                                                                                                                                                                                                                                                                                                                                                                                                                                                                                                                                                                                                                                                                                                                                                                                                                                                                                                                                                                                                                                                                                                                                                                                                                                                                                                                                                                                                                                                                                                                                                                                                                                                                                                                                                                                                                                                                                                                                                                        | -8.01  | 36.00 | 5.46 | P | IN  |
| QL02945 | 2-(Nonafluorobutyl)thiophene                                   | 96721-81-2   | F(C(F)(F)(C(F)(F)(C(F)(F)(C(F)(F)F1cccc1                                                                                                                                                                                                                                                                                                                                                                                                                                                                                                                                                                                                                                                                                                                                                                                                                                                                                                                                                                                                                                                                                                                                                                                                                                                                                                                                                                                                                                                                                                                                                                                                                                                                                                                                                                                                                                                                                                                                                                                                                                                                                                                                                                                                                                                                                                                                                                                                                                                                                                                                                                                                                                                                                                                                                                                                                                                                                                                                                                                                                                                                                                                                                                                                                                                                                                                                                                                                                                                                                                                                                                                                                                                                                                                                                                                                                                                                                                                                                                                                                                                                                                                                                                                                                                                                                                                                                                                                                                                                                                                                                                                                                                                                                                                                                                                                                                                                                                                                                                                                                                                                                                                                                                                                                                                                                                                                                                                                                                                                                                                                                                                                                                                                                                                                                                                                                                                                                         | -8.15  | 42.86 | 5.46 | P | IN  |
| QL02946 | 3-(Nonafluorobutyl)-1H-indole                                  | 1608112-33-9 | F(C(F)(F)(C(F)(F)(C(F)(F)(C(F)(F)F1c1nc2ccccc12                                                                                                                                                                                                                                                                                                                                                                                                                                                                                                                                                                                                                                                                                                                                                                                                                                                                                                                                                                                                                                                                                                                                                                                                                                                                                                                                                                                                                                                                                                                                                                                                                                                                                                                                                                                                                                                                                                                                                                                                                                                                                                                                                                                                                                                                                                                                                                                                                                                                                                                                                                                                                                                                                                                                                                                                                                                                                                                                                                                                                                                                                                                                                                                                                                                                                                                                                                                                                                                                                                                                                                                                                                                                                                                                                                                                                                                                                                                                                                                                                                                                                                                                                                                                                                                                                                                                                                                                                                                                                                                                                                                                                                                                                                                                                                                                                                                                                                                                                                                                                                                                                                                                                                                                                                                                                                                                                                                                                                                                                                                                                                                                                                                                                                                                                                                                                                                                                  | -9.93  | 32.14 | 6.39 | P | OUT |
| QL02947 | Nonafluorobutylepoxide                                         | 89807-87-4   | F(C(F)(F)(C(F)(F)(C(F)(F)(C(F)(F)C1CO1                                                                                                                                                                                                                                                                                                                                                                                                                                                                                                                                                                                                                                                                                                                                                                                                                                                                                                                                                                                                                                                                                                                                                                                                                                                                                                                                                                                                                                                                                                                                                                                                                                                                                                                                                                                                                                                                                                                                                                                                                                                                                                                                                                                                                                                                                                                                                                                                                                                                                                                                                                                                                                                                                                                                                                                                                                                                                                                                                                                                                                                                                                                                                                                                                                                                                                                                                                                                                                                                                                                                                                                                                                                                                                                                                                                                                                                                                                                                                                                                                                                                                                                                                                                                                                                                                                                                                                                                                                                                                                                                                                                                                                                                                                                                                                                                                                                                                                                                                                                                                                                                                                                                                                                                                                                                                                                                                                                                                                                                                                                                                                                                                                                                                                                                                                                                                                                                                           | -7.51  | 47.37 | 5.11 | P | IN  |
| QL02948 | 4-(Nonafluorobutyl)-1,3-dioxolan-2-one                         | 1469980-27-5 | F(C(F)(F)(C(F)(F)(C(F)(F)(C(F)(F)C1COC(=O)O1                                                                                                                                                                                                                                                                                                                                                                                                                                                                                                                                                                                                                                                                                                                                                                                                                                                                                                                                                                                                                                                                                                                                                                                                                                                                                                                                                                                                                                                                                                                                                                                                                                                                                                                                                                                                                                                                                                                                                                                                                                                                                                                                                                                                                                                                                                                                                                                                                                                                                                                                                                                                                                                                                                                                                                                                                                                                                                                                                                                                                                                                                                                                                                                                                                                                                                                                                                                                                                                                                                                                                                                                                                                                                                                                                                                                                                                                                                                                                                                                                                                                                                                                                                                                                                                                                                                                                                                                                                                                                                                                                                                                                                                                                                                                                                                                                                                                                                                                                                                                                                                                                                                                                                                                                                                                                                                                                                                                                                                                                                                                                                                                                                                                                                                                                                                                                                                                                     | -8.42  | 40.91 | 5.60 | P | IN  |
| QL02949 | 3-(Nonafluorobutyl)-1-benzothiophene                           | 1608112-39-5 | F(C(F)(F)(C(F)(F)(C(F)(F)(C(F)(F)F1c1cs2ccccc2S1                                                                                                                                                                                                                                                                                                                                                                                                                                                                                                                                                                                                                                                                                                                                                                                                                                                                                                                                                                                                                                                                                                                                                                                                                                                                                                                                                                                                                                                                                                                                                                                                                                                                                                                                                                                                                                                                                                                                                                                                                                                                                                                                                                                                                                                                                                                                                                                                                                                                                                                                                                                                                                                                                                                                                                                                                                                                                                                                                                                                                                                                                                                                                                                                                                                                                                                                                                                                                                                                                                                                                                                                                                                                                                                                                                                                                                                                                                                                                                                                                                                                                                                                                                                                                                                                                                                                                                                                                                                                                                                                                                                                                                                                                                                                                                                                                                                                                                                                                                                                                                                                                                                                                                                                                                                                                                                                                                                                                                                                                                                                                                                                                                                                                                                                                                                                                                                                                 | -9.96  | 33.33 | 6.39 | P | OUT |
| QL02950 | 2-(Nonafluorobutyl)-1H-indole                                  | 1608112-34-0 | F(C(F)(F)(C(F)(F)(C(F)(F)(C(F)(F)F1c1Nc2ccccc2C1                                                                                                                                                                                                                                                                                                                                                                                                                                                                                                                                                                                                                                                                                                                                                                                                                                                                                                                                                                                                                                                                                                                                                                                                                                                                                                                                                                                                                                                                                                                                                                                                                                                                                                                                                                                                                                                                                                                                                                                                                                                                                                                                                                                                                                                                                                                                                                                                                                                                                                                                                                                                                                                                                                                                                                                                                                                                                                                                                                                                                                                                                                                                                                                                                                                                                                                                                                                                                                                                                                                                                                                                                                                                                                                                                                                                                                                                                                                                                                                                                                                                                                                                                                                                                                                                                                                                                                                                                                                                                                                                                                                                                                                                                                                                                                                                                                                                                                                                                                                                                                                                                                                                                                                                                                                                                                                                                                                                                                                                                                                                                                                                                                                                                                                                                                                                                                                                                 | -9.93  | 32.14 | 6.39 | P | OUT |
| QL02951 | 3-(Nonafluorobutyl)-5-phenyl-1H-pyrazole                       | 204130-95-0  | F(C(F)(F)(C(F)(F)(C(F)(F)(C(F)(F)F1c1nnc(c1)c1ccccc1                                                                                                                                                                                                                                                                                                                                                                                                                                                                                                                                                                                                                                                                                                                                                                                                                                                                                                                                                                                                                                                                                                                                                                                                                                                                                                                                                                                                                                                                                                                                                                                                                                                                                                                                                                                                                                                                                                                                                                                                                                                                                                                                                                                                                                                                                                                                                                                                                                                                                                                                                                                                                                                                                                                                                                                                                                                                                                                                                                                                                                                                                                                                                                                                                                                                                                                                                                                                                                                                                                                                                                                                                                                                                                                                                                                                                                                                                                                                                                                                                                                                                                                                                                                                                                                                                                                                                                                                                                                                                                                                                                                                                                                                                                                                                                                                                                                                                                                                                                                                                                                                                                                                                                                                                                                                                                                                                                                                                                                                                                                                                                                                                                                                                                                                                                                                                                                                             | -10.06 | 29.03 | 6.48 | P | OUT |
| QL02952 | 11-(Nonafluorobutyl)-9,10-dihydro-9,10-(epithiomethano)ant     | 267648-90-8  | F(C(F)(F)(C(F)(F)(C(F)(F)(C(F)(F)F1C1SC2C3CCCC3C1c1cccc2C1                                                                                                                                                                                                                                                                                                                                                                                                                                                                                                                                                                                                                                                                                                                                                                                                                                                                                                                                                                                                                                                                                                                                                                                                                                                                                                                                                                                                                                                                                                                                                                                                                                                                                                                                                                                                                                                                                                                                                                                                                                                                                                                                                                                                                                                                                                                                                                                                                                                                                                                                                                                                                                                                                                                                                                                                                                                                                                                                                                                                                                                                                                                                                                                                                                                                                                                                                                                                                                                                                                                                                                                                                                                                                                                                                                                                                                                                                                                                                                                                                                                                                                                                                                                                                                                                                                                                                                                                                                                                                                                                                                                                                                                                                                                                                                                                                                                                                                                                                                                                                                                                                                                                                                                                                                                                                                                                                                                                                                                                                                                                                                                                                                                                                                                                                                                                                                                                       | -13.27 | 22.50 | 8.05 | P | OUT |
| QL02953 | 3,3,4,4,5,5,6,6-Nonafluorohekanoyl chloride                    | 64018-24-2   | F(C(F)(F)(C(F)(F)(C(F)(F)(C(F)(F)F1CCCCl)=O                                                                                                                                                                                                                                                                                                                                                                                                                                                                                                                                                                                                                                                                                                                                                                                                                                                                                                                                                                                                                                                                                                                                                                                                                                                                                                                                                                                                                                                                                                                                                                                                                                                                                                                                                                                                                                                                                                                                                                                                                                                                                                                                                                                                                                                                                                                                                                                                                                                                                                                                                                                                                                                                                                                                                                                                                                                                                                                                                                                                                                                                                                                                                                                                                                                                                                                                                                                                                                                                                                                                                                                                                                                                                                                                                                                                                                                                                                                                                                                                                                                                                                                                                                                                                                                                                                                                                                                                                                                                                                                                                                                                                                                                                                                                                                                                                                                                                                                                                                                                                                                                                                                                                                                                                                                                                                                                                                                                                                                                                                                                                                                                                                                                                                                                                                                                                                                                                      | -7.46  | 52.63 | 5.04 | P | IN  |
| QL02954 | Thiols, C10-20, gamma.-omega.-perfluoro (Perfluoroalkyl)C8     | 68140-21-6   | F(C(F)(F)(C(F)(F)(C(F)(F)(C(F)(F)F1CCCC(F)(F)(F)CCS                                                                                                                                                                                                                                                                                                                                                                                                                                                                                                                                                                                                                                                                                                                                                                                                                                                                                                                                                                                                                                                                                                                                                                                                                                                                                                                                                                                                                                                                                                                                                                                                                                                                                                                                                                                                                                                                                                                                                                                                                                                                                                                                                                                                                                                                                                                                                                                                                                                                                                                                                                                                                                                                                                                                                                                                                                                                                                                                                                                                                                                                                                                                                                                                                                                                                                                                                                                                                                                                                                                                                                                                                                                                                                                                                                                                                                                                                                                                                                                                                                                                                                                                                                                                                                                                                                                                                                                                                                                                                                                                                                                                                                                                                                                                                                                                                                                                                                                                                                                                                                                                                                                                                                                                                                                                                                                                                                                                                                                                                                                                                                                                                                                                                                                                                                                                                                                                              | -9.08  | 45.45 | 5.86 | P | IN  |
| QL02955 | 1,1,1,2,2,3,3,4,4,6,6,8,8-Tridecafluoro-10-iododecane          | 272451-64-6  | F(C(F)(F)(C(F)(F)(C(F)(F)(C(F)(F)F1CCCC(F)(F)(F)CCI                                                                                                                                                                                                                                                                                                                                                                                                                                                                                                                                                                                                                                                                                                                                                                                                                                                                                                                                                                                                                                                                                                                                                                                                                                                                                                                                                                                                                                                                                                                                                                                                                                                                                                                                                                                                                                                                                                                                                                                                                                                                                                                                                                                                                                                                                                                                                                                                                                                                                                                                                                                                                                                                                                                                                                                                                                                                                                                                                                                                                                                                                                                                                                                                                                                                                                                                                                                                                                                                                                                                                                                                                                                                                                                                                                                                                                                                                                                                                                                                                                                                                                                                                                                                                                                                                                                                                                                                                                                                                                                                                                                                                                                                                                                                                                                                                                                                                                                                                                                                                                                                                                                                                                                                                                                                                                                                                                                                                                                                                                                                                                                                                                                                                                                                                                                                                                                                              | -8.71  | 43.75 | 5.71 | P | IN  |
| QL02956 | 1,1,1,2,2,3,3,4,4,6,6,8,8-Tridecafluoro-8-iodooctane           | 99325-17-4   | F(C(F)(F)(C(F)(F)(C(F)(F)(C(F)(F)F1CCCC(F)(F)(F)CI                                                                                                                                                                                                                                                                                                                                                                                                                                                                                                                                                                                                                                                                                                                                                                                                                                                                                                                                                                                                                                                                                                                                                                                                                                                                                                                                                                                                                                                                                                                                                                                                                                                                                                                                                                                                                                                                                                                                                                                                                                                                                                                                                                                                                                                                                                                                                                                                                                                                                                                                                                                                                                                                                                                                                                                                                                                                                                                                                                                                                                                                                                                                                                                                                                                                                                                                                                                                                                                                                                                                                                                                                                                                                                                                                                                                                                                                                                                                                                                                                                                                                                                                                                                                                                                                                                                                                                                                                                                                                                                                                                                                                                                                                                                                                                                                                                                                                                                                                                                                                                                                                                                                                                                                                                                                                                                                                                                                                                                                                                                                                                                                                                                                                                                                                                                                                                                                               | -8.56  | 53.85 | 5.54 | P | IN  |
| QL02957 | 1,1,1,2,2,3,3,4,4,6,6-Undecafluoro-8-iodooctane                | 53626-95-2   | F(C(F)(F)(C(F)(F)(C(F)(F)(C(F)(F)F1CCCC(F)(F)(F)CI                                                                                                                                                                                                                                                                                                                                                                                                                                                                                                                                                                                                                                                                                                                                                                                                                                                                                                                                                                                                                                                                                                                                                                                                                                                                                                                                                                                                                                                                                                                                                                                                                                                                                                                                                                                                                                                                                                                                                                                                                                                                                                                                                                                                                                                                                                                                                                                                                                                                                                                                                                                                                                                                                                                                                                                                                                                                                                                                                                                                                                                                                                                                                                                                                                                                                                                                                                                                                                                                                                                                                                                                                                                                                                                                                                                                                                                                                                                                                                                                                                                                                                                                                                                                                                                                                                                                                                                                                                                                                                                                                                                                                                                                                                                                                                                                                                                                                                                                                                                                                                                                                                                                                                                                                                                                                                                                                                                                                                                                                                                                                                                                                                                                                                                                                                                                                                                                               | -8.00  | 46.15 | 5.35 | P | IN  |
| QL02958 | 4-(Perfluorobutyl)-3,3-difluorobutanedisulfonyl chloride       | 1225375-54-1 | F(C(F)(F)(C(F)(F)(C(F)(F)(C(F)(F)F1CCCC(F)(F)(F)CS(=O)(=O)O                                                                                                                                                                                                                                                                                                                                                                                                                                                                                                                                                                                                                                                                                                                                                                                                                                                                                                                                                                                                                                                                                                                                                                                                                                                                                                                                                                                                                                                                                                                                                                                                                                                                                                                                                                                                                                                                                                                                                                                                                                                                                                                                                                                                                                                                                                                                                                                                                                                                                                                                                                                                                                                                                                                                                                                                                                                                                                                                                                                                                                                                                                                                                                                                                                                                                                                                                                                                                                                                                                                                                                                                                                                                                                                                                                                                                                                                                                                                                                                                                                                                                                                                                                                                                                                                                                                                                                                                                                                                                                                                                                                                                                                                                                                                                                                                                                                                                                                                                                                                                                                                                                                                                                                                                                                                                                                                                                                                                                                                                                                                                                                                                                                                                                                                                                                                                                                                      | -8.48  | 41.38 | 5.62 | P | IN  |
| QL02959 | 1-(3,3,4,4,5,5,6,6-Nonafluoro-1-iodohexyl)-2,8,9-trioxa-5-az   | 135587-13-2  | F(C(F)(F)(C(F)(F)(C(F)(F)(C(F)(F)F1CCCC(F)(F)(F)COC(=O)COC(=O)C                                                                                                                                                                                                                                                                                                                                                                                                                                                                                                                                                                                                                                                                                                                                                                                                                                                                                                                                                                                                                                                                                                                                                                                                                                                                                                                                                                                                                                                                                                                                                                                                                                                                                                                                                                                                                                                                                                                                                                                                                                                                                                                                                                                                                                                                                                                                                                                                                                                                                                                                                                                                                                                                                                                                                                                                                                                                                                                                                                                                                                                                                                                                                                                                                                                                                                                                                                                                                                                                                                                                                                                                                                                                                                                                                                                                                                                                                                                                                                                                                                                                                                                                                                                                                                                                                                                                                                                                                                                                                                                                                                                                                                                                                                                                                                                                                                                                                                                                                                                                                                                                                                                                                                                                                                                                                                                                                                                                                                                                                                                                                                                                                                                                                                                                                                                                                                                                  | -10.47 | 23.81 | 6.73 | P | OUT |
| QL02960 | 1,1,1,2,2,3,3,4,4,5,5,6,6,7,7,8,8,11,11,12,12,13,13,14,14,14-H | 53638-10-1   | F(C(F)(F)(C(F)(F)(C(F)(F)(C(F)(F)F1CCCC(F)(F)(F)C(F)(F)(F)(F)(F)(F)(F)(F)(F)(F)(F)(F)(F)(F)(F)(F)(F)(F)(F)(F)(F)(F)(F)(F)(F)(F)(F)(F)(F)(F)(F)(F)(F)(F)(F)(F)(F)(F)(F)(F)(F)(F)(F)(F)(F)(F)(F)(F)(F)(F)(F)(F)(F)(F)(F)(F)(F)(F)(F)(F)(F)(F)(F)(F)(F)(F)(F)(F)(F)(F)(F)(F)(F)(F)(F)(F)(F)(F)(F)(F)(F)(F)(F)(F)(F)(F)(F)(F)(F)(F)(F)(F)(F)(F)(F)(F)(F)(F)(F)(F)(F)(F)(F)(F)(F)(F)(F)(F)(F)(F)(F)(F)(F)(F)(F)(F)(F)(F)(F)(F)(F)(F)(F)(F)(F)(F)(F)(F)(F)(F)(F)(F)(F)(F)(F)(F)(F)(F)(F)(F)(F)(F)(F)(F)(F)(F)(F)(F)(F)(F)(F)(F)(F)(F)(F)(F)(F)(F)(F)(F)(F)(F)(F)(F)(F)(F)(F)(F)(F)(F)(F)(F)(F)(F)(F)(F)(F)(F)(F)(F)(F)(F)(F)(F)(F)(F)(F)(F)(F)(F)(F)(F)(F)(F)(F)(F)(F)(F)(F)(F)(F)(F)(F)(F)(F)(F)(F)(F)(F)(F)(F)(F)(F)(F)(F)(F)(F)(F)(F)(F)(F)(F)(F)(F)(F)(F)(F)(F)(F)(F)(F)(F)(F)(F)(F)(F)(F)(F)(F)(F)(F)(F)(F)(F)(F)(F)(F)(F)(F)(F)(F)(F)(F)(F)(F)(F)(F)(F)(F)(F)(F)(F)(F)(F)(F)(F)(F)(F)(F)(F)(F)(F)(F)(F)(F)(F)(F)(F)(F)(F)(F)(F)(F)(F)(F)(F)(F)(F)(F)(F)(F)(F)(F)(F)(F)(F)(F)(F)(F)(F)(F)(F)(F)(F)(F)(F)(F)(F)(F)(F)(F)(F)(F)(F)(F)(F)(F)(F)(F)(F)(F)(F)(F)(F)(F)(F)(F)(F)(F)(F)(F)(F)(F)(F)(F)(F)(F)(F)(F)(F)(F)(F)(F)(F)(F)(F)(F)(F)(F)(F)(F)(F)(F)(F)(F)(F)(F)(F)(F)(F)(F)(F)(F)(F)(F)(F)(F)(F)(F)(F)(F)(F)(F)(F)(F)(F)(F)(F)(F)(F)(F)(F)(F)(F)(F)(F)(F)(F)(F)(F)(F)(F)(F)(F)(F)(F)(F)(F)(F)(F)(F)(F)(F)(F)(F)(F)(F)(F)(F)(F)(F)(F)(F)(F)(F)(F)(F)(F)(F)(F)(F)(F)(F)(F)(F)(F)(F)(F)(F)(F)(F)(F)(F)(F)(F)(F)(F)(F)(F)(F)(F)(F)(F)(F)(F)(F)(F)(F)(F)(F)(F)(F)(F)(F)(F)(F)(F)(F)(F)(F)(F)(F)(F)(F)(F)(F)(F)(F)(F)(F)(F)(F)(F)(F)(F)(F)(F)(F)(F)(F)(F)(F)(F)(F)(F)(F)(F)(F)(F)(F)(F)(F)(F)(F)(F)(F)(F)(F)(F)(F)(F)(F)(F)(F)(F)(F)(F)(F)(F)(F)(F)(F)(F)(F)(F)(F)(F)(F)(F)(F)(F)(F)(F)(F)(F)(F)(F)(F)(F)(F)(F)(F)(F)(F)(F)(F)(F)(F)(F)(F)(F)(F)(F)(F)(F)(F)(F)(F)(F)(F)(F)(F)(F)(F)(F)(F)(F)(F)(F)(F)(F)(F)(F)(F)(F)(F)(F)(F)(F)(F)(F)(F)(F)(F)(F)(F)(F)(F)(F)(F)(F)(F)(F)(F)(F)(F)(F)(F)(F)(F)(F)(F)(F)(F)(F)(F)(F)(F)(F)(F)(F)(F)(F)(F)(F)(F)(F)(F)(F)(F)(F)(F)(F)(F)(F)(F)(F)(F)(F)(F)(F)(F)(F)(F)(F)(F)(F)(F)(F)(F)(F)(F)(F)(F)(F)(F)(F)(F)(F)(F)(F)(F)(F)(F)(F)(F)(F)(F)(F)(F)(F)(F)(F)(F)(F)(F)(F)(F)(F)(F)(F)(F)(F)(F)(F)(F)(F)(F)(F)(F)(F)(F)(F)(F)(F)(F)(F)(F)(F)(F)(F)(F)(F)(F)(F)(F)(F)(F)(F)(F)(F)(F)(F)(F)(F)(F)(F)(F)(F)(F)(F)(F)(F)(F)(F)(F)(F)(F)(F)(F)(F)(F)(F)(F)(F)(F)(F)(F)(F)(F)(F)(F)(F)(F)(F)(F)(F)(F)(F)(F)(F)(F)(F)(F)(F)(F)(F)(F)(F)(F)(F)(F)(F)(F)(F)(F)(F)(F)(F)(F)(F)(F)(F)(F)(F)(F)(F)(F)(F)(F)(F)(F)(F)(F)(F)(F)(F)(F)(F)(F)(F)(F)(F)(F)(F)(F)(F)(F)(F)(F)(F)(F)(F)(F)(F)(F)(F)(F)(F)(F)(F)(F)(F)(F)(F)(F)(F)(F)(F)(F)(F)(F)(F)(F)(F)(F)(F)(F)(F)(F)(F)(F)(F)(F)(F)(F)(F)(F)(F)(F)(F)(F)(F)(F)(F)(F)(F)(F)(F)(F)(F)(F)(F)(F)(F)(F)(F)(F)(F)(F)(F)(F)(F)(F)(F)(F)(F)(F)(F)(F)(F)(F)(F)(F)(F)(F)(F)(F)(F)(F)(F)(F)(F)(F)(F)(F)(F)(F)(F)(F)(F)(F)(F)(F)(F)(F)(F)(F)(F)(F)(F)(F)(F)(F)(F)(F)(F)(F)(F)(F)(F)(F)(F)(F)(F)(F)(F)(F)(F)(F)(F)(F)(F)(F)(F)(F)(F)(F)(F)(F)(F)(F)(F)(F)(F)(F)(F)(F)(F)(F)(F)(F)(F)(F)(F)(F)(F)(F)(F)(F)(F)(F)(F)(F)(F)(F)(F)(F)(F)(F)(F)(F)(F)(F)(F)(F)(F)(F)(F)(F)(F)(F)(F)(F)(F)(F)(F)(F)(F)(F)(F)(F)(F)(F)(F)(F)(F)(F)(F)(F)(F)(F)(F)(F)(F)(F)(F)(F)(F)(F)(F)(F)(F)(F)(F)(F)(F)(F)(F)(F)(F)(F)(F)(F)(F)(F)(F)(F)(F)(F)(F)(F)(F)(F)(F)(F)(F)(F)(F)(F)(F)(F)(F)(F)(F)(F)(F)(F)(F)(F)(F)(F)(F)(F)(F)(F)(F)(F)(F)(F)(F)(F)(F)(F)(F)(F)(F)(F)(F)(F)(F)(F)(F)(F)(F)(F)(F)(F)(F)(F)(F)(F)(F)(F)(F)(F)(F)(F)(F)(F)(F)(F)(F)(F)(F)(F)(F)(F)(F)(F)(F)(F)(F)(F)(F)(F)(F)(F)(F)(F)(F)(F)(F)(F)(F)(F)(F)(F)(F)(F)(F)(F)(F)(F)(F)(F)(F)(F)(F)(F)(F)(F)(F)(F)(F)(F)(F)(F)(F)(F)(F)(F)(F)(F)(F)(F)(F)(F)(F)(F)(F)(F)(F)(F)(F)(F)(F)(F)(F)(F)(F)(F)(F)(F)(F)(F)(F)(F)(F)(F)(F)(F)(F)(F)(F)(F)(F)(F)(F)(F)(F)(F)(F)(F)(F)(F)(F)(F)(F)(F)(F)(F)(F)(F)(F)(F)(F)(F)(F)(F)(F)(F)(F)(F)(F)(F)(F)(F)(F)(F)(F)(F)(F)(F)(F)(F)(F)(F)(F)(F)(F)(F)(F)(F)(F)(F)(F)(F)(F)(F)(F)(F)(F)(F)(F)(F)(F)(F)(F)(F)(F)(F)(F)(F)(F)(F)(F)(F)(F)(F)(F)(F)(F)(F)(F)(F)(F)(F)(F)(F)(F)(F)(F)(F)(F)(F)(F)(F)(F)(F)(F)(F)(F)(F)(F)(F)(F)(F)(F)(F)(F)(F)(F)(F)(F)(F)(F)(F)(F)(F)(F)(F)(F)(F)(F)(F)(F)(F)(F)(F)(F)(F)(F)(F)(F)(F)(F)(F)(F)(F)(F)(F)(F)(F)(F)(F)(F)(F)(F)(F)(F)(F)(F)(F)(F)(F)(F)(F)(F)(F)(F)(F)(F)(F)(F)(F)(F)(F)(F)(F)(F)(F)(F)(F)(F)(F)(F)(F)(F)(F)(F)(F)(F)(F)(F)(F)(F)(F)(F)(F)(F)(F)(F)(F)(F)(F)(F)(F)(F)(F)(F)(F)(F)(F)(F)(F)(F)(F)(F)(F)(F)(F)(F)(F)(F)(F)(F)(F)(F)(F)(F)(F)(F)(F)(F)(F)(F)(F)(F)(F)(F)(F)(F)(F)(F)(F)(F)(F)(F)(F)(F)(F)(F)(F)(F)(F)(F)(F)(F)(F)(F)(F)(F)(F)(F)(F)(F)(F)(F)(F)(F)(F)(F)(F)(F)(F)(F)(F)(F)(F)(F)(F)(F)(F)(F)(F)(F)(F)(F)(F)(F)(F)(F)(F)(F)(F)(F)(F)(F)(F)(F)(F)(F)(F)(F)(F)(F)(F)(F)(F)(F)(F)(F)(F)(F)(F)(F)(F)(F)(F)(F)(F)(F)(F)(F)(F)(F)(F)(F)(F)(F)(F)(F)(F)(F)(F)(F)(F)(F)(F)(F)(F)(F)(F)(F)(F)(F)(F)(F)(F)(F)(F)(F)(F)(F)(F)(F)(F)(F)(F)(F)(F)(F)(F)(F)(F)(F)(F)(F)(F)(F)(F)(F)(F)(F)(F)(F)(F)(F)(F)(F)(F)(F)(F)(F)(F)(F)(F)(F)(F)(F)(F)(F)(F)(F)(F)(F)(F)(F)(F)(F)(F)(F)(F)(F)(F)(F)(F)(F)(F)(F)(F)(F)(F)(F)(F)(F)(F)(F)(F)(F)(F)(F)(F)(F)(F)(F)(F)(F)(F)(F)(F)(F)(F)(F)(F)(F)(F)(F)(F)(F)(F)(F)(F)(F)(F)(F)(F)(F)(F)(F)(F)(F)(F)(F)(F)(F)(F)(F)(F)(F)(F)(F)(F)(F)(F)(F)(F)(F)(F)(F)(F)(F)(F)(F)(F)(F)(F)(F)(F)(F)(F)(F)(F)(F)(F)(F)(F)(F)(F)(F)(F)(F)(F)(F)(F)(F)(F)(F)(F)(F)(F)(F)(F)(F)(F)(F)(F)(F)(F)(F)(F)(F)(F)(F)(F)(F)(F)(F)(F)(F)(F)(F)(F)(F)(F)(F)(F)(F)(F)(F)(F)(F)(F)(F)(F)(F)(F)(F)(F)(F)(F)(F)(F)(F)(F)(F)(F)(F)(F)(F)(F)(F)(F)(F)(F)(F)(F)(F)(F)(F)(F)(F)(F)(F)(F)(F)(F)(F)(F)(F)(F)(F)(F)(F)(F)(F)(F)(F)(F)(F)(F)(F)(F)(F)(F)(F)(F)(F)(F)(F)(F)(F)(F)(F)(F)(F)(F)(F)(F)(F)(F)(F)(F)(F)(F)(F)(F)(F)(F)(F)(F)(F)(F)(F)(F)(F)(F)(F)(F)(F)(F)(F)(F)(F)(F)(F)(F)(F)(F)(F)(F)(F)(F)(F)(F)(F)(F)(F)(F)(F)(F)(F)(F)(F)(F)(F)(F)(F)(F)(F)(F)(F)(F)(F)(F)(F)(F)(F)(F)(F)(F)(F)(F)(F)(F)(F)(F)(F)(F)(F)(F)(F)(F)(F)(F)(F)(F)(F)(F)(F)(F)(F)(F)(F)(F)(F)(F)(F)(F)(F)(F)(F)(F)(F)(F)(F)(F)(F)(F)(F)(F)(F)(F)(F)(F)(F)(F)(F)(F)(F)(F)(F)(F)(F)(F)(F)(F)(F)(F)(F)(F)(F)(F)(F)(F)(F)(F)(F)(F)(F)(F)(F)(F)(F)(F)(F)(F)(F)(F)(F)(F)(F)(F)(F)(F)(F)(F)(F)(F)(F)(F)( |        |       |      |   |     |



[illegible]



|         |                                                                         |              |                                                                    |        |       |      |   |     |
|---------|-------------------------------------------------------------------------|--------------|--------------------------------------------------------------------|--------|-------|------|---|-----|
| QL03073 | 3-(2,2,3,3,4,4,4-Heptafluorobutylidene)oxolan-2-one                     | 89608-45-7   | F(C(F)(F)(C(F)(F)(F))C=C1CCOC1=O                                   | -7.82  | 31.82 | 5.41 | P | OUT |
| QL03074 | 4,4,5,5,6,6-Heptafluoro-1-phenylhex-2-en-1-one                          | 110960-47-9  | F(C(F)(F)(C(F)(F)(F))C=C1C=O)c1ccccc1                              | -8.30  | 25.93 | 5.69 | P | OUT |
| QL03075 | 1,1,1,2,2,3,3,6,6,7,7,8,8,9,10,10,11,11,11-tcosafluoroundec-1-ene       | 100603-63-2  | F(C(F)(F)(C(F)(C(F)(F))C=C(C(F)(F)(F)(F)(C(F)(F)(C(F)(F)(F)(F)(F   | -10.13 | 60.61 | 6.21 | P | IN  |
| QL03076 | 1,1,1,2,2,3,3,6,6,7,7,8,8,9,10,10,10-Octadecafluorodec-4-ene            | 935477-16-0  | F(C(F)(F)(C(F)(C(F)(F))C=C(C(F)(F)(F)(F)(C(F)(F)(C(F)(F)(F)(F)(F   | -9.69  | 60.00 | 6.01 | P | IN  |
| QL03077 | 1,1,1,2,2,3,3,6,6,7,7,8,8,9,9-Hexadecafluoronon-4-ene                   | 935477-07-9  | F(C(F)(F)(C(F)(C(F)(F))C=C(C(F)(F)(F)(F)(C(F)(F)(C(F)(F)(F)(F)(F   | -9.20  | 59.26 | 5.79 | P | IN  |
| QL03078 | 1,1,1,2,2,3,3,6,6,7,7,8,8,8-Tetradecafluorooct-4-ene                    | 3910-82-5    | F(C(F)(F)(C(F)(C(F)(F))C=C(C(F)(F)(F)(F)(C(F)(F)(F)(F)(F           | -8.65  | 58.33 | 5.54 | P | IN  |
| QL03080 | 3,3,4,4,5,5,5-Heptafluoro-1-iodo-1-pentene                              | 376-97-6     | F(C(F)(F)(C(F)(C(F)(F))C=C1                                        | -6.38  | 53.33 | 4.52 | P | IN  |
| QL03082 | (1E)-2,2,3,3,4,4,4-Heptafluoro-N-phenylbutan-1-imine                    | 62765-24-6   | F(C(F)(F)(C(F)(C(F)(F))C=N1C=CC=CC=C1                              | -7.98  | 29.17 | 5.51 | P | OUT |
| QL03083 | (1E)-2,2,3,3,4,4,4-Heptafluoro-N-[2-phenylethyl]butan-1-imini           | 29723-32-8   | F(C(F)(F)(C(F)(C(F)(F))C=NCCCC1=CC=CC=C1                           | -8.25  | 23.33 | 5.69 | P | OUT |
| QL03084 | Perfluorobutyraldehyde                                                  | 375-02-0     | F(C(F)(F)(C(F)(C(F)(F))C=O                                         | -6.06  | 53.85 | 4.37 | P | IN  |
| QL03085 | Undecafluoro(haftafluoropropyl)cyclohexane                              | 374-59-4     | F(C(F)(F)(C(F)(C(F)(F))C1(F)(C(F)(F)(C(F)(F)(C(F)(F)(C(F)(F)F      | -10.83 | 66.67 | 6.48 | P | OUT |
| QL03086 | 2,2,3,3,4,4,5,6,6-Nonafluoro-5-(heptafluoropropyl)oxane                 | 801-26-3     | F(C(F)(F)(C(F)(C(F)(F))C1(F)(C(F)(F)OC1(F)(C(F)(F)(C(F)(F)C1(F)F   | -10.41 | 64.00 | 6.31 | P | IN  |
| QL03087 | 3,4,4-Trifluoro-3-(heptafluoropropyl)-1,2-lambda <sup>6</sup> -oxathiet | 156465-44-0  | F(C(F)(F)(C(F)(C(F)(F))C(F)(C1(F)(F)(F)OS1(F)=O)=O                 | -8.81  | 52.63 | 5.67 | P | IN  |
| QL03088 | 2,2,3,3,4,4,5,5,6-Nonafluoro-6-(heptafluoropropyl)tetrahydro            | 335-35-3     | F(C(F)(F)(C(F)(C(F)(F))C1(F)OC(F)(F)(C(F)(F)(C(F)(F)C1(F)F         | -10.41 | 64.00 | 6.31 | P | IN  |
| QL03089 | 2,2,3,3,4,4,5-Heptafluoro-5-(heptafluoropropyl)oxolane                  | 423-22-3     | F(C(F)(F)(C(F)(C(F)(F))C1(F)OC(F)(F)C1(F)(C(F)(F)C1(F)F            | -9.78  | 63.64 | 6.02 | P | IN  |
| QL03090 | 2,2,3-Trifluoro-3-(heptafluoropropyl)oxirane                            | 74942-19-1   | F(C(F)(F)(C(F)(C(F)(F))C1(F)OC1(F)F                                | -8.09  | 62.50 | 5.24 | P | IN  |
| QL03091 | 1,4-Bis(chloromethyl)-2-(heptafluoropropyl)benzene                      | 139263-35-7  | F(C(F)(F)(C(F)(C(F)(F))C1=C(Cl)C(Cl)=CC(Cl)=C1                     | -8.75  | 33.33 | 5.83 | P | OUT |
| QL03092 | 5-(Heptafluoropropyl)-3-phenyl-1H-pyrazole                              | 54864-78-7   | F(C(F)(F)(C(F)(C(F)(F))C1=C(C)=NN1C1=CC=CC=C1                      | -9.51  | 25.00 | 6.27 | P | OUT |
| QL03093 | 6-(Heptafluoropropyl)-2-sulfanylidene-2,3-dihydropyrimidin-4            | 88191-88-2   | F(C(F)(F)(C(F)(C(F)(F))C1=CC(=O)NC(=S)N1                           | -8.24  | 33.33 | 5.59 | P | IN  |
| QL03094 | 1-Bromo-3-(heptafluoropropyl)benzene                                    | 53104-06-6   | F(C(F)(F)(C(F)(C(F)(F))C1=CC(Br)=CC=C1                             | -8.05  | 38.10 | 5.46 | P | IN  |
| QL03095 | 2-[[4-(Heptafluoropropyl)phenyl]methyl]oxirane                          | 144006-68-8  | F(C(F)(F)(C(F)(C(F)(F))C1=CC=C(CC2CO2)C=C1                         | -8.92  | 24.14 | 6.00 | P | OUT |
| QL03096 | N-[6-(Heptafluoropropyl)-2-oxo-2H-pyran-3-yl]benzamide                  | 860454-18-8  | F(C(F)(F)(C(F)(C(F)(F))C1=CC=C(NC(=O)c2cccc2)C(=O)O1               | -10.23 | 20.59 | 6.65 | P | OUT |
| QL03097 | Quinoline, 4-(heptafluoropropyl)-                                       | 181059-73-4  | F(C(F)(F)(C(F)(C(F)(F))C1=CC=NC2=C(C=CC=C12                        | -9.59  | 26.92 | 6.29 | P | OUT |
| QL03098 | AC1LC6EI                                                                | 60007-37-6   | F(C(F)(F)(C(F)(C(F)(F))C1=CNC(=O)NC1=O                             | -8.24  | 33.33 | 5.59 | P | IN  |
| QL03099 | 5-(Heptafluoropropyl)-2-sulfanylidene-2,3-dihydropyrimidin-4            | 145663-11-2  | F(C(F)(F)(C(F)(C(F)(F))C1=CNC(=S)NC1=O                             | -8.24  | 33.33 | 5.59 | P | IN  |
| QL03100 | (4S)-4-Benzyl-2-(heptafluoropropyl)-4,5-dihydro-1,3-oxazole             | 1366341-52-7 | F(C(F)(F)(C(F)(C(F)(F))C1=N[C@@H](Cc2cccc2)CO1                     | -9.60  | 21.88 | 6.34 | P | OUT |
| QL03101 | 2,4,6-Tris(heptafluoropropyl)-1,3,5-triazine                            | 915-76-4     | F(C(F)(F)(C(F)(C(F)(F))C1=NC(=NC(=N1)C(F)(C(F)(F)(C(F)(F)(C(F)(F)F | -11.84 | 58.33 | 7.03 | P | OUT |
| QL03102 | MLS0026948Z                                                             | 4314-49-2    | F(C(F)(F)(C(F)(C(F)(F))C1=NC(=O)ON1                                | -7.79  | 41.18 | 5.30 | P | IN  |
| QL03103 | Benzimidazole, 5(or 6)-chloro-2-(heptafluoropropyl)-                    | 6866-58-6    | F(C(F)(F)(C(F)(C(F)(F))C1=NC2=C(N1)C=C(Cl)C=C2                     | -9.75  | 33.33 | 6.30 | P | OUT |
| QL03104 | 2-(Heptafluoropropyl)-1H-benzimidazole                                  | 559-37-5     | F(C(F)(F)(C(F)(C(F)(F))C1=NC2=CC=CC=C2N1                           | -9.38  | 29.17 | 6.16 | P | OUT |
| QL03105 | 2-(Perfluoropropyl)benzoxazole                                          | 2008-06-2    | F(C(F)(F)(C(F)(C(F)(F))C1=NC2=CC=CC=C2O1                           | -9.40  | 30.43 | 6.16 | P | OUT |
| QL03106 | 4-(Heptafluoropropyl)-1,3-dihydro-2H-1,5-benzodiazepin-2-ol             | 96146-10-0   | F(C(F)(F)(C(F)(C(F)(F))C1=NC2cccc2NC(=O)C1                         | -10.00 | 24.14 | 6.50 | P | OUT |
| QL03107 | 2-(heptafluoropropyl)-4,5-dihydro-1H-imidazole                          | 4472-70-2    | F(C(F)(F)(C(F)(C(F)(F))C1=NCNC1                                    | -7.32  | 35.00 | 5.14 | P | IN  |
| QL03108 | 2-(Heptafluoropropyl)-1-phenyl-4,5-dihydro-1H-imidazole                 | 1069085-53-5 | F(C(F)(F)(C(F)(C(F)(F))C1=NCNC1c1ccccc1                            | -9.47  | 23.33 | 6.27 | P | OUT |
| QL03109 | 1-Benzyl-2-(heptafluoropropyl)-4,5-dihydro-1H-imidazole                 | 1069085-51-3 | F(C(F)(F)(C(F)(C(F)(F))C1=NCNC1Cc1ccccc1                           | -9.47  | 21.21 | 6.34 | P | OUT |
| QL03110 | 2-Perfluoropropyl-5-phenyl-1,3,4-oxadiazole                             | 5756-67-2    | F(C(F)(F)(C(F)(C(F)(F))C1=NN=C(O1)C1=CC=CC=C1                      | -9.55  | 26.92 | 6.27 | P | OUT |
| QL03111 | 5-(heptafluoropropyl)-1-phenyl-1H-tetrazole                             | 2712-85-8    | F(C(F)(F)(C(F)(C(F)(F))C1=NN=NN1C1=CC=CC=C1                        | -9.55  | 26.92 | 6.27 | P | OUT |
| QL03112 | 4-Bromo-2-(heptafluoropropyl)pyridine                                   | 1816283-37-0 | F(C(F)(F)(C(F)(C(F)(F))C1=cc(Br)ccn1                               | -8.09  | 40.00 | 5.46 | P | IN  |
| QL03113 | 4-Chloro-2-(heptafluoropropyl)pyridine                                  | 1816283-32-5 | F(C(F)(F)(C(F)(C(F)(F))C1=cc(Cl)ccn1                               | -8.09  | 40.00 | 5.46 | P | IN  |
| QL03114 | 1-Bromo-4-(heptafluoropropyl)benzene                                    | 117874-91-6  | F(C(F)(F)(C(F)(C(F)(F))C1=ccc(Br)cc1                               | -8.05  | 38.10 | 5.46 | P | IN  |
| QL03115 | 5-Bromo-2-(heptafluoropropyl)pyridine                                   | 1816282-96-8 | F(C(F)(F)(C(F)(C(F)(F))C1=ccc(Br)cn1                               | -8.09  | 40.00 | 5.46 | P | IN  |
| QL03116 | 1-(Heptafluoropropyl)-4-iodobenzene                                     | 1417885-93-8 | F(C(F)(F)(C(F)(C(F)(F))C1=ccc(I)cc1                                | -8.05  | 38.10 | 5.46 | P | IN  |
| QL03117 | N-[5-(Heptafluoropropyl)](1,1'-biphenyl)-2-yl]benzamide                 | 748785-00-4  | F(C(F)(F)(C(F)(C(F)(F))C1=ccc(NC(=O)c2cccc2)c(c1)c1ccccc1          | -11.40 | 15.56 | 7.24 | P | OUT |
| QL03118 | 2-(Heptafluoropropyl)quinoline                                          | 57702-79-1   | F(C(F)(F)(C(F)(C(F)(F))C1=ccc2cccc2n1                              | -9.59  | 26.92 | 6.29 | P | OUT |
| QL03119 | 5-(Heptafluoropropyl)isoquinoline-1-carbaldehyde                        | 31181-32-5   | F(C(F)(F)(C(F)(C(F)(F))C1=ccc2c(C=O)nc1c2                          | -10.07 | 25.00 | 6.53 | P | OUT |
| QL03120 | (Heptafluoropropyl)benzene                                              | 378-98-3     | F(C(F)(F)(C(F)(C(F)(F))C1=cccc1                                    | -7.64  | 33.33 | 5.31 | P | IN  |
| QL03121 | 2-(Heptafluoropropyl)cyclohexan-1-one                                   | 61282-91-5   | F(C(F)(F)(C(F)(C(F)(F))C1=CCCCC1=O                                 | -7.82  | 26.92 | 5.46 | P | OUT |
| QL03122 | 1-(heptafluoropropyl)-2-iodocyclohexane                                 | 2728-75-8    | F(C(F)(F)(C(F)(C(F)(F))C1=CCCCC1I                                  | -7.88  | 29.63 | 5.46 | P | OUT |
| QL03123 | 3-(Heptafluoropropyl)oxolane                                            | 143837-48-3  | F(C(F)(F)(C(F)(C(F)(F))C1=CCOC1                                    | -7.25  | 31.82 | 5.14 | P | IN  |
| QL03124 | 5-(Heptafluoropropyl)dihydropyrimidine-2,4(1H,3H)-dione                 | 90715-84-7   | F(C(F)(F)(C(F)(C(F)(F))C1=CN(C=O)NC1=O                             | -8.18  | 30.43 | 5.59 | P | OUT |
| QL03125 | 5-(Heptafluoropropyl)pyrimidine                                         | 1354703-21-1 | F(C(F)(F)(C(F)(C(F)(F))C1=cnnc1                                    | -7.71  | 36.84 | 5.31 | P | IN  |
| QL03126 | 2-(Heptafluoropropyl)oxirane                                            | 51035-20-2   | F(C(F)(F)(C(F)(C(F)(F))C1CO1                                       | -6.65  | 43.75 | 4.74 | P | IN  |
| QL03127 | 5-(Heptafluoropropyl)-1H-pyrrole-2-carbaldehyde                         | 123825-52-5  | F(C(F)(F)(C(F)(C(F)(F))C1=NC(C=O)C=O                               | -7.93  | 33.33 | 5.45 | P | IN  |
| QL03128 | 4,6-Dichloro-2-(heptafluoropropyl)pyrimidine                            | 1023815-55-1 | F(C(F)(F)(C(F)(C(F)(F))C1=nc(Cl)cc(Cl)n1                           | -8.54  | 47.37 | 5.59 | P | IN  |
| QL03129 | 2-(Heptafluoropropyl)-1H-indole                                         | 123825-50-3  | F(C(F)(F)(C(F)(C(F)(F))C1=NC2=cccc2c1                              | -9.35  | 28.00 | 6.16 | P | OUT |
| QL03130 | 2-(Heptafluoropropyl)-3-phenylquinoxaline                               | 69492-70-2   | F(C(F)(F)(C(F)(C(F)(F))C1=NC2=cccc2nc1c1ccccc1                     | -11.26 | 20.00 | 7.13 | P | OUT |
| QL03131 | 4-Chloro-2-(heptafluoropropyl)pyrimidine                                | 937676-00-1  | F(C(F)(F)(C(F)(C(F)(F))C1=ccc(Cl)n1                                | -8.14  | 42.11 | 5.46 | P | IN  |
| QL03132 | 2-(Heptafluoropropyl)-1H-pyrrole                                        | 118425-75-5  | F(C(F)(F)(C(F)(C(F)(F))C1=NCc1                                     | -7.36  | 36.84 | 5.14 | P | IN  |
| QL03133 | 1-(Heptafluoropropyl)isoquinoline                                       | 70414-12-9   | F(C(F)(F)(C(F)(C(F)(F))C1=ccc2cccc12                               | -9.59  | 26.92 | 6.29 | P | OUT |
| QL03134 | 2-(Heptafluoropropyl)pyrimidine                                         | 133391-64-7  | F(C(F)(F)(C(F)(C(F)(F))C1=cnccn1                                   | -7.71  | 36.84 | 5.31 | P | IN  |
| QL03135 | Imidazolidine, 2-heptafluoropropyl-                                     | 31185-53-2   | F(C(F)(F)(C(F)(C(F)(F))C1=NCNC1                                    | -7.25  | 31.82 | 5.14 | P | IN  |
| QL03136 | 2-(Heptafluoropropyl)-1H-imidazole                                      | 81769-47-3   | F(C(F)(F)(C(F)(C(F)(F))C1=NCcn1                                    | -7.40  | 38.89 | 5.14 | P | IN  |
| QL03138 | 4-Bromo-3-(heptafluoropropyl)-5-phenyl-1H-pyrazole                      | 82633-52-1   | F(C(F)(F)(C(F)(C(F)(F))C1=Nn(C18r)c1ccccc1                         | -9.78  | 28.57 | 6.36 | P | OUT |
| QL03139 | 5-(Heptafluoropropyl)-3-phenyl-1H-1,2,4-triazole                        | 2195-67-7    | F(C(F)(F)(C(F)(C(F)(F))C1=Nncc(n1)c1ccccc1                         | -9.53  | 25.93 | 6.27 | P | OUT |
| QL03140 | 3-(Heptafluoropropyl)-6-(morpholin-4-yl)[1,2,4]triazolo[4,3-b]          | 296886-61-8  | F(C(F)(F)(C(F)(C(F)(F))C1=nn2cccc(nn12)N1CCOC1                     | -11.27 | 20.00 | 7.14 | P | OUT |
| QL03141 | 3-(Heptafluoropropyl)-1H-pyrazole                                       | 158148-63-1  | F(C(F)(F)(C(F)(C(F)(F))C1=nnCc1                                    | -7.40  | 36.89 | 5.14 | P | IN  |
| QL03142 | 2(SH)-Furanone, 5-(heptafluoropropyl)-                                  | 143469-51-6  | F(C(F)(F)(C(F)(C(F)(F))C1OC(=O)C=C1                                | -7.70  | 36.84 | 5.30 | P | IN  |
| QL03143 | 2-(Heptafluoropropyl)-1,3-dioxolane                                     | 109799-66-8  | F(C(F)(F)(C(F)(C(F)(F))C1=OCCO1                                    | -7.32  | 35.00 | 5.14 | P | IN  |
| QL03144 | Allyl heptafluorobutyrate                                               | 17165-55-8   | F(C(F)(F)(C(F)(C(F)(F))CC(=O)OC=C                                  | -6.81  | 33.33 | 4.92 | P | IN  |
| QL03145 | 1,1,1,2,2,3,3,10,10,11,11,12,12,12-Tetradecafluoro-5,8-diiodo           | 2357-30-4    | F(C(F)(F)(C(F)(C(F)(F))C1=CC(C1)CC(C1)C(F)(C(F)(F)(F)F             | -9.32  | 42.11 | 6.01 | P | IN  |
| QL03146 | 1,1,1,2,2,3,3,11,11,12,12,13,13,13-Tetradecafluoro-5,9-diiodo           | 1644-06-0    | F(C(F)(F)(C(F)(C(F)(F))C1=CC(C1)CC(C1)C(F)(C(F)(F)(F)F             | -9.40  | 39.02 | 6.08 | P | IN  |
| QL03147 | Trichloro(3,3,4,4,5,5-heptafluoropentyl)silane                          | 866-24-0     | F(C(F)(F)(C(F)(C(F)(F))CC(Si)(Cl)(Cl)Cl                            | -7.16  | 50.00 | 4.92 | P | IN  |
| QL03148 | 3,3,4,4,5,5,5-heptafluoropentanal                                       | 126015-32-5  | F(C(F)(F)(C(F)(C(F)(F))CC=O                                        | -6.18  | 43.75 | 4.52 | P | IN  |
| QL03149 | (2,2,3,3,4,4,4-Heptafluorobutyl)benzene                                 | 81664-99-5   | F(C(F)(F)(C(F)(C(F)(F))C1=cccc1                                    | -7.77  | 29.17 | 5.41 | P | OUT |
| QL03150 | 1H,1H-Heptafluorobutyl epoxide                                          | 1765-92-0    | F(C(F)(F)(C(F)(C(F)(F))C1C1CO1                                     | -6.79  | 36.84 | 4.88 | P | IN  |
| QL03151 | 2-(2,3,3,4,4,4-Heptafluorobutyl)-1,3-dioxolane                          | 175607-87-1  | F(C(F)(F)(C(F)(C(F)(F))C1=OCCO1                                    | -7.46  | 30.43 | 5.25 | P | OUT |



|         |                                                                  |              |                                                                                                                                                                                                                                                                                                                                                                                                                                                                                                                                                                                                                                                                                                                                                                                                                                                                                                                                                                                                                                                                                                                                                                                                                                                                                                                                                                                                                                                                                                                                                                                                                                                                                                                                                                                                                                                                                                                                                                                                                                                                                                                                                                                                                                                                                                                                                                                                                                                                                                                                                                                                                                                                                                                                                                                                                                                                                                                                                                                                                                                                                                                                                                                                                                                                                                                                                                                                                                                                                                                                                                                                                                                                                                                                                                                                                                                                                                                                                                                                                                                                                                                                                                                                                                                                                                                                                                                                                                                                                                                                                                                                                                                                                                                                                                                                                                                                                                                                                                                                                                                                                                                                                                                           |        |       |      |   |  |     |
|---------|------------------------------------------------------------------|--------------|-------------------------------------------------------------------------------------------------------------------------------------------------------------------------------------------------------------------------------------------------------------------------------------------------------------------------------------------------------------------------------------------------------------------------------------------------------------------------------------------------------------------------------------------------------------------------------------------------------------------------------------------------------------------------------------------------------------------------------------------------------------------------------------------------------------------------------------------------------------------------------------------------------------------------------------------------------------------------------------------------------------------------------------------------------------------------------------------------------------------------------------------------------------------------------------------------------------------------------------------------------------------------------------------------------------------------------------------------------------------------------------------------------------------------------------------------------------------------------------------------------------------------------------------------------------------------------------------------------------------------------------------------------------------------------------------------------------------------------------------------------------------------------------------------------------------------------------------------------------------------------------------------------------------------------------------------------------------------------------------------------------------------------------------------------------------------------------------------------------------------------------------------------------------------------------------------------------------------------------------------------------------------------------------------------------------------------------------------------------------------------------------------------------------------------------------------------------------------------------------------------------------------------------------------------------------------------------------------------------------------------------------------------------------------------------------------------------------------------------------------------------------------------------------------------------------------------------------------------------------------------------------------------------------------------------------------------------------------------------------------------------------------------------------------------------------------------------------------------------------------------------------------------------------------------------------------------------------------------------------------------------------------------------------------------------------------------------------------------------------------------------------------------------------------------------------------------------------------------------------------------------------------------------------------------------------------------------------------------------------------------------------------------------------------------------------------------------------------------------------------------------------------------------------------------------------------------------------------------------------------------------------------------------------------------------------------------------------------------------------------------------------------------------------------------------------------------------------------------------------------------------------------------------------------------------------------------------------------------------------------------------------------------------------------------------------------------------------------------------------------------------------------------------------------------------------------------------------------------------------------------------------------------------------------------------------------------------------------------------------------------------------------------------------------------------------------------------------------------------------------------------------------------------------------------------------------------------------------------------------------------------------------------------------------------------------------------------------------------------------------------------------------------------------------------------------------------------------------------------------------------------------------------------------------------------------|--------|-------|------|---|--|-----|
| QLO3152 | 5-Bromo-1,1,2,2,3,3-heptafluoropentane                           | 355-94-1     | FC(F)(F)C(F)(F)C(F)FCBr                                                                                                                                                                                                                                                                                                                                                                                                                                                                                                                                                                                                                                                                                                                                                                                                                                                                                                                                                                                                                                                                                                                                                                                                                                                                                                                                                                                                                                                                                                                                                                                                                                                                                                                                                                                                                                                                                                                                                                                                                                                                                                                                                                                                                                                                                                                                                                                                                                                                                                                                                                                                                                                                                                                                                                                                                                                                                                                                                                                                                                                                                                                                                                                                                                                                                                                                                                                                                                                                                                                                                                                                                                                                                                                                                                                                                                                                                                                                                                                                                                                                                                                                                                                                                                                                                                                                                                                                                                                                                                                                                                                                                                                                                                                                                                                                                                                                                                                                                                                                                                                                                                                                                                   | -6.25  | 47.06 | 4.52 | P |  | IN  |
| QLO3153 | 1,1,1,2,2,3,4,4,5,5,6,6,9,10,10,11,11-icosafluoroundeca-         | 777931-73-4  | FC(F)(F)C(F)(F)C(F)FC(CCC(F)(F)C(F)C(F)C(F)C(F)C(F)F)                                                                                                                                                                                                                                                                                                                                                                                                                                                                                                                                                                                                                                                                                                                                                                                                                                                                                                                                                                                                                                                                                                                                                                                                                                                                                                                                                                                                                                                                                                                                                                                                                                                                                                                                                                                                                                                                                                                                                                                                                                                                                                                                                                                                                                                                                                                                                                                                                                                                                                                                                                                                                                                                                                                                                                                                                                                                                                                                                                                                                                                                                                                                                                                                                                                                                                                                                                                                                                                                                                                                                                                                                                                                                                                                                                                                                                                                                                                                                                                                                                                                                                                                                                                                                                                                                                                                                                                                                                                                                                                                                                                                                                                                                                                                                                                                                                                                                                                                                                                                                                                                                                                                     | -8.06  | 57.14 | 6.21 | P |  | IN  |
| QLO3154 | 1,1,1,2,2,3,3,6,6,7,7,8,8,8-Tetradecafluoroctane                 | 1835251-92-7 | FC(F)(F)C(F)C(F)C(F)C(CCF)(F)C(F)C(F)C(F)F                                                                                                                                                                                                                                                                                                                                                                                                                                                                                                                                                                                                                                                                                                                                                                                                                                                                                                                                                                                                                                                                                                                                                                                                                                                                                                                                                                                                                                                                                                                                                                                                                                                                                                                                                                                                                                                                                                                                                                                                                                                                                                                                                                                                                                                                                                                                                                                                                                                                                                                                                                                                                                                                                                                                                                                                                                                                                                                                                                                                                                                                                                                                                                                                                                                                                                                                                                                                                                                                                                                                                                                                                                                                                                                                                                                                                                                                                                                                                                                                                                                                                                                                                                                                                                                                                                                                                                                                                                                                                                                                                                                                                                                                                                                                                                                                                                                                                                                                                                                                                                                                                                                                                | -10.66 | 53.85 | 5.54 | P |  | IN  |
| QLO3155 | 7-Bromo-1,1,1,2,2,3,3-heptafluoroheptane                         | 1391033-22-9 | FC(F)(F)C(F)C(F)C(F)CCCCBr                                                                                                                                                                                                                                                                                                                                                                                                                                                                                                                                                                                                                                                                                                                                                                                                                                                                                                                                                                                                                                                                                                                                                                                                                                                                                                                                                                                                                                                                                                                                                                                                                                                                                                                                                                                                                                                                                                                                                                                                                                                                                                                                                                                                                                                                                                                                                                                                                                                                                                                                                                                                                                                                                                                                                                                                                                                                                                                                                                                                                                                                                                                                                                                                                                                                                                                                                                                                                                                                                                                                                                                                                                                                                                                                                                                                                                                                                                                                                                                                                                                                                                                                                                                                                                                                                                                                                                                                                                                                                                                                                                                                                                                                                                                                                                                                                                                                                                                                                                                                                                                                                                                                                                | -6.58  | 34.78 | 4.80 | P |  | IN  |
| QLO3156 | 1,1,1,2,2,3,3,10,10,11,11,12,12,12-Tetradecafluorododecane       | 69125-82-2   | FC(F)(F)C(F)C(F)C(F)C(CCCCCCCC(F)(F)C(F)C(F)C(F)F)                                                                                                                                                                                                                                                                                                                                                                                                                                                                                                                                                                                                                                                                                                                                                                                                                                                                                                                                                                                                                                                                                                                                                                                                                                                                                                                                                                                                                                                                                                                                                                                                                                                                                                                                                                                                                                                                                                                                                                                                                                                                                                                                                                                                                                                                                                                                                                                                                                                                                                                                                                                                                                                                                                                                                                                                                                                                                                                                                                                                                                                                                                                                                                                                                                                                                                                                                                                                                                                                                                                                                                                                                                                                                                                                                                                                                                                                                                                                                                                                                                                                                                                                                                                                                                                                                                                                                                                                                                                                                                                                                                                                                                                                                                                                                                                                                                                                                                                                                                                                                                                                                                                                        | -8.90  | 36.84 | 5.86 | P |  | IN  |
| QLO3157 | 1,1,1,2,2,3,3,12,12,13,13,14,14,14-Tetradecafluorotetradecan     | 1835251-91-6 | FC(F)(F)C(F)C(F)C(F)CCCCCCCCC(F)C(F)C(F)C(F)F                                                                                                                                                                                                                                                                                                                                                                                                                                                                                                                                                                                                                                                                                                                                                                                                                                                                                                                                                                                                                                                                                                                                                                                                                                                                                                                                                                                                                                                                                                                                                                                                                                                                                                                                                                                                                                                                                                                                                                                                                                                                                                                                                                                                                                                                                                                                                                                                                                                                                                                                                                                                                                                                                                                                                                                                                                                                                                                                                                                                                                                                                                                                                                                                                                                                                                                                                                                                                                                                                                                                                                                                                                                                                                                                                                                                                                                                                                                                                                                                                                                                                                                                                                                                                                                                                                                                                                                                                                                                                                                                                                                                                                                                                                                                                                                                                                                                                                                                                                                                                                                                                                                                             | -9.10  | 31.82 | 6.01 | P |  | OUT |
| QLO3158 | 1,1,1,2,2,3,3,14,14,15,15,16,16,16-Tetradecafluorohexadecan      | 168169-26-4  | FC(F)(F)C(F)C(F)C(F)CCCCCCCCC(F)C(F)C(F)C(F)F                                                                                                                                                                                                                                                                                                                                                                                                                                                                                                                                                                                                                                                                                                                                                                                                                                                                                                                                                                                                                                                                                                                                                                                                                                                                                                                                                                                                                                                                                                                                                                                                                                                                                                                                                                                                                                                                                                                                                                                                                                                                                                                                                                                                                                                                                                                                                                                                                                                                                                                                                                                                                                                                                                                                                                                                                                                                                                                                                                                                                                                                                                                                                                                                                                                                                                                                                                                                                                                                                                                                                                                                                                                                                                                                                                                                                                                                                                                                                                                                                                                                                                                                                                                                                                                                                                                                                                                                                                                                                                                                                                                                                                                                                                                                                                                                                                                                                                                                                                                                                                                                                                                                             | -9.31  | 28.00 | 6.14 | P |  | OUT |
| QLO3159 | 1,1,1,2,2,3,3-Heptafluoro-7-iodoheptane                          | 2967-60-4    | FC(F)(F)C(F)C(F)C(F)CCCCI                                                                                                                                                                                                                                                                                                                                                                                                                                                                                                                                                                                                                                                                                                                                                                                                                                                                                                                                                                                                                                                                                                                                                                                                                                                                                                                                                                                                                                                                                                                                                                                                                                                                                                                                                                                                                                                                                                                                                                                                                                                                                                                                                                                                                                                                                                                                                                                                                                                                                                                                                                                                                                                                                                                                                                                                                                                                                                                                                                                                                                                                                                                                                                                                                                                                                                                                                                                                                                                                                                                                                                                                                                                                                                                                                                                                                                                                                                                                                                                                                                                                                                                                                                                                                                                                                                                                                                                                                                                                                                                                                                                                                                                                                                                                                                                                                                                                                                                                                                                                                                                                                                                                                                 | -6.58  | 34.78 | 4.80 | P |  | IN  |
| QLO3160 | 1,1,1,2,2,3,3-Heptafluoro-5-iodopentane                          | 68188-12-5   | FC(F)(F)C(F)C(F)C(F)CCI                                                                                                                                                                                                                                                                                                                                                                                                                                                                                                                                                                                                                                                                                                                                                                                                                                                                                                                                                                                                                                                                                                                                                                                                                                                                                                                                                                                                                                                                                                                                                                                                                                                                                                                                                                                                                                                                                                                                                                                                                                                                                                                                                                                                                                                                                                                                                                                                                                                                                                                                                                                                                                                                                                                                                                                                                                                                                                                                                                                                                                                                                                                                                                                                                                                                                                                                                                                                                                                                                                                                                                                                                                                                                                                                                                                                                                                                                                                                                                                                                                                                                                                                                                                                                                                                                                                                                                                                                                                                                                                                                                                                                                                                                                                                                                                                                                                                                                                                                                                                                                                                                                                                                                   | -6.25  | 47.06 | 4.52 | P |  | IN  |
| QLO3161 | 1,1,1,2,2,3,3-Heptafluoro-4-chlorobutane                         | 374-97-0     | FC(F)(F)C(F)C(F)C(F)Cl                                                                                                                                                                                                                                                                                                                                                                                                                                                                                                                                                                                                                                                                                                                                                                                                                                                                                                                                                                                                                                                                                                                                                                                                                                                                                                                                                                                                                                                                                                                                                                                                                                                                                                                                                                                                                                                                                                                                                                                                                                                                                                                                                                                                                                                                                                                                                                                                                                                                                                                                                                                                                                                                                                                                                                                                                                                                                                                                                                                                                                                                                                                                                                                                                                                                                                                                                                                                                                                                                                                                                                                                                                                                                                                                                                                                                                                                                                                                                                                                                                                                                                                                                                                                                                                                                                                                                                                                                                                                                                                                                                                                                                                                                                                                                                                                                                                                                                                                                                                                                                                                                                                                                                    | -6.13  | 57.14 | 4.37 | P |  | IN  |
| QLO3162 | Heptafluorobutyl iodide                                          | 374-98-1     | FC(F)(F)C(F)C(F)C(F)CI                                                                                                                                                                                                                                                                                                                                                                                                                                                                                                                                                                                                                                                                                                                                                                                                                                                                                                                                                                                                                                                                                                                                                                                                                                                                                                                                                                                                                                                                                                                                                                                                                                                                                                                                                                                                                                                                                                                                                                                                                                                                                                                                                                                                                                                                                                                                                                                                                                                                                                                                                                                                                                                                                                                                                                                                                                                                                                                                                                                                                                                                                                                                                                                                                                                                                                                                                                                                                                                                                                                                                                                                                                                                                                                                                                                                                                                                                                                                                                                                                                                                                                                                                                                                                                                                                                                                                                                                                                                                                                                                                                                                                                                                                                                                                                                                                                                                                                                                                                                                                                                                                                                                                                    | -6.13  | 57.14 | 4.37 | P |  | IN  |
| QLO3163 | 1-chloro-1,1,2,2,3,3,3-heptafluoropropane                        | 422-86-6     | FC(F)(F)C(F)C(F)C(F)Cl                                                                                                                                                                                                                                                                                                                                                                                                                                                                                                                                                                                                                                                                                                                                                                                                                                                                                                                                                                                                                                                                                                                                                                                                                                                                                                                                                                                                                                                                                                                                                                                                                                                                                                                                                                                                                                                                                                                                                                                                                                                                                                                                                                                                                                                                                                                                                                                                                                                                                                                                                                                                                                                                                                                                                                                                                                                                                                                                                                                                                                                                                                                                                                                                                                                                                                                                                                                                                                                                                                                                                                                                                                                                                                                                                                                                                                                                                                                                                                                                                                                                                                                                                                                                                                                                                                                                                                                                                                                                                                                                                                                                                                                                                                                                                                                                                                                                                                                                                                                                                                                                                                                                                                    | -6.10  | 72.73 | 4.20 | P |  | OUT |
| QLO3164 | N-Nitrosobis(2,2,3,3,4,4,4-heptafluorobutyl)amine                | 83329-16-2   | FC(F)(F)C(F)C(F)C(F)CN(CC(F)(F)C(F)C(F)C(F)F)N=O                                                                                                                                                                                                                                                                                                                                                                                                                                                                                                                                                                                                                                                                                                                                                                                                                                                                                                                                                                                                                                                                                                                                                                                                                                                                                                                                                                                                                                                                                                                                                                                                                                                                                                                                                                                                                                                                                                                                                                                                                                                                                                                                                                                                                                                                                                                                                                                                                                                                                                                                                                                                                                                                                                                                                                                                                                                                                                                                                                                                                                                                                                                                                                                                                                                                                                                                                                                                                                                                                                                                                                                                                                                                                                                                                                                                                                                                                                                                                                                                                                                                                                                                                                                                                                                                                                                                                                                                                                                                                                                                                                                                                                                                                                                                                                                                                                                                                                                                                                                                                                                                                                                                          | -8.97  | 48.28 | 5.79 | P |  | IN  |
| QLO3165 | Isocyanic acid, 2,2,3,3,4,4,4-heptafluorobutyl ester             | 377-00-4     | FC(F)(F)C(F)C(F)C(F)CN=C=O                                                                                                                                                                                                                                                                                                                                                                                                                                                                                                                                                                                                                                                                                                                                                                                                                                                                                                                                                                                                                                                                                                                                                                                                                                                                                                                                                                                                                                                                                                                                                                                                                                                                                                                                                                                                                                                                                                                                                                                                                                                                                                                                                                                                                                                                                                                                                                                                                                                                                                                                                                                                                                                                                                                                                                                                                                                                                                                                                                                                                                                                                                                                                                                                                                                                                                                                                                                                                                                                                                                                                                                                                                                                                                                                                                                                                                                                                                                                                                                                                                                                                                                                                                                                                                                                                                                                                                                                                                                                                                                                                                                                                                                                                                                                                                                                                                                                                                                                                                                                                                                                                                                                                                | -6.48  | 43.75 | 4.66 | P |  | IN  |
| QLO3166 | N-(2,2,3,3,4,4-Heptafluorobutyl)prop-2-enamide                   | 1422-65-7    | FC(F)(F)C(F)C(F)C(F)CNC(=O)C=C                                                                                                                                                                                                                                                                                                                                                                                                                                                                                                                                                                                                                                                                                                                                                                                                                                                                                                                                                                                                                                                                                                                                                                                                                                                                                                                                                                                                                                                                                                                                                                                                                                                                                                                                                                                                                                                                                                                                                                                                                                                                                                                                                                                                                                                                                                                                                                                                                                                                                                                                                                                                                                                                                                                                                                                                                                                                                                                                                                                                                                                                                                                                                                                                                                                                                                                                                                                                                                                                                                                                                                                                                                                                                                                                                                                                                                                                                                                                                                                                                                                                                                                                                                                                                                                                                                                                                                                                                                                                                                                                                                                                                                                                                                                                                                                                                                                                                                                                                                                                                                                                                                                                                            | -6.78  | 31.82 | 4.92 | P |  | IN  |
| QLO3167 | 3-Benzamido-N-(2,2,3,3,4,4,4-heptafluorobutyl)benzamide          | 917920-92-4  | FC(F)(F)C(F)C(F)C(F)CNC(=O)C1=CC(NC(=O)C2=CC=CC=C2)=CC=C1                                                                                                                                                                                                                                                                                                                                                                                                                                                                                                                                                                                                                                                                                                                                                                                                                                                                                                                                                                                                                                                                                                                                                                                                                                                                                                                                                                                                                                                                                                                                                                                                                                                                                                                                                                                                                                                                                                                                                                                                                                                                                                                                                                                                                                                                                                                                                                                                                                                                                                                                                                                                                                                                                                                                                                                                                                                                                                                                                                                                                                                                                                                                                                                                                                                                                                                                                                                                                                                                                                                                                                                                                                                                                                                                                                                                                                                                                                                                                                                                                                                                                                                                                                                                                                                                                                                                                                                                                                                                                                                                                                                                                                                                                                                                                                                                                                                                                                                                                                                                                                                                                                                                 | -10.52 | 16.67 | 6.82 | P |  | OUT |
| QLO3168 | N-(2,2,3,3,4,4,4-Heptafluorobutyl)benzamide                      | 304458-19-3  | FC(F)(F)C(F)C(F)C(F)CNC(=O)c1ccccc1                                                                                                                                                                                                                                                                                                                                                                                                                                                                                                                                                                                                                                                                                                                                                                                                                                                                                                                                                                                                                                                                                                                                                                                                                                                                                                                                                                                                                                                                                                                                                                                                                                                                                                                                                                                                                                                                                                                                                                                                                                                                                                                                                                                                                                                                                                                                                                                                                                                                                                                                                                                                                                                                                                                                                                                                                                                                                                                                                                                                                                                                                                                                                                                                                                                                                                                                                                                                                                                                                                                                                                                                                                                                                                                                                                                                                                                                                                                                                                                                                                                                                                                                                                                                                                                                                                                                                                                                                                                                                                                                                                                                                                                                                                                                                                                                                                                                                                                                                                                                                                                                                                                                                       | -8.28  | 25.00 | 5.69 | P |  | OUT |
| QLO3169 | 2,2,3,3,4,4,4-Heptafluoro-N-(2,2,3,3,4,4,4-heptafluorobutyl)bi   | 356-08-1     | FC(F)(F)C(F)C(F)C(F)CNC(C(F)(F)C(F)C(F)C(F)F)                                                                                                                                                                                                                                                                                                                                                                                                                                                                                                                                                                                                                                                                                                                                                                                                                                                                                                                                                                                                                                                                                                                                                                                                                                                                                                                                                                                                                                                                                                                                                                                                                                                                                                                                                                                                                                                                                                                                                                                                                                                                                                                                                                                                                                                                                                                                                                                                                                                                                                                                                                                                                                                                                                                                                                                                                                                                                                                                                                                                                                                                                                                                                                                                                                                                                                                                                                                                                                                                                                                                                                                                                                                                                                                                                                                                                                                                                                                                                                                                                                                                                                                                                                                                                                                                                                                                                                                                                                                                                                                                                                                                                                                                                                                                                                                                                                                                                                                                                                                                                                                                                                                                             | -8.66  | 50.00 | 5.62 | P |  | IN  |
| QLO3170 | Tris[1H,1H-heptafluorobutyl]phosphate                            | 563-09-7     | FC(F)(F)C(F)C(F)C(F)CO([P](=O)(OC(F)(F)C(F)C(F)C(F)FOCC(F)(F)C(F)C(F)C(F)F)                                                                                                                                                                                                                                                                                                                                                                                                                                                                                                                                                                                                                                                                                                                                                                                                                                                                                                                                                                                                                                                                                                                                                                                                                                                                                                                                                                                                                                                                                                                                                                                                                                                                                                                                                                                                                                                                                                                                                                                                                                                                                                                                                                                                                                                                                                                                                                                                                                                                                                                                                                                                                                                                                                                                                                                                                                                                                                                                                                                                                                                                                                                                                                                                                                                                                                                                                                                                                                                                                                                                                                                                                                                                                                                                                                                                                                                                                                                                                                                                                                                                                                                                                                                                                                                                                                                                                                                                                                                                                                                                                                                                                                                                                                                                                                                                                                                                                                                                                                                                                                                                                                               | -10.72 | 47.73 | 6.61 | P |  | IN  |
| QLO3171 | Chlorotris(2,2,3,3,4,4,4-heptafluorobutoxy)silane                | 757-72-2     | FC(F)(F)C(F)C(F)C(F)CO[Si](Cl)(OC(F)(F)C(F)C(F)C(F)FOCC(F)(F)C(F)C(F)C(F)F                                                                                                                                                                                                                                                                                                                                                                                                                                                                                                                                                                                                                                                                                                                                                                                                                                                                                                                                                                                                                                                                                                                                                                                                                                                                                                                                                                                                                                                                                                                                                                                                                                                                                                                                                                                                                                                                                                                                                                                                                                                                                                                                                                                                                                                                                                                                                                                                                                                                                                                                                                                                                                                                                                                                                                                                                                                                                                                                                                                                                                                                                                                                                                                                                                                                                                                                                                                                                                                                                                                                                                                                                                                                                                                                                                                                                                                                                                                                                                                                                                                                                                                                                                                                                                                                                                                                                                                                                                                                                                                                                                                                                                                                                                                                                                                                                                                                                                                                                                                                                                                                                                                | -10.76 | 50.00 | 6.61 | P |  | OUT |
| QLO3172 | tris(perfluoropropyl)methyl borate                               | 755-53-3     | FC(F)(F)C(F)C(F)C(F)COB(OC(F)(F)C(F)C(F)FOCC(F)(F)C(F)C(F)C(F)F                                                                                                                                                                                                                                                                                                                                                                                                                                                                                                                                                                                                                                                                                                                                                                                                                                                                                                                                                                                                                                                                                                                                                                                                                                                                                                                                                                                                                                                                                                                                                                                                                                                                                                                                                                                                                                                                                                                                                                                                                                                                                                                                                                                                                                                                                                                                                                                                                                                                                                                                                                                                                                                                                                                                                                                                                                                                                                                                                                                                                                                                                                                                                                                                                                                                                                                                                                                                                                                                                                                                                                                                                                                                                                                                                                                                                                                                                                                                                                                                                                                                                                                                                                                                                                                                                                                                                                                                                                                                                                                                                                                                                                                                                                                                                                                                                                                                                                                                                                                                                                                                                                                           | -10.63 | 48.84 | 6.56 | P |  | OUT |
| QLO3173 | 2,2,3,3,4,4,4-Heptafluorobutyl-2-cyanoprop-2-enoate              | 130192-28-8  | FC(F)(F)C(F)C(F)C(F)COC(=O)C=C#N                                                                                                                                                                                                                                                                                                                                                                                                                                                                                                                                                                                                                                                                                                                                                                                                                                                                                                                                                                                                                                                                                                                                                                                                                                                                                                                                                                                                                                                                                                                                                                                                                                                                                                                                                                                                                                                                                                                                                                                                                                                                                                                                                                                                                                                                                                                                                                                                                                                                                                                                                                                                                                                                                                                                                                                                                                                                                                                                                                                                                                                                                                                                                                                                                                                                                                                                                                                                                                                                                                                                                                                                                                                                                                                                                                                                                                                                                                                                                                                                                                                                                                                                                                                                                                                                                                                                                                                                                                                                                                                                                                                                                                                                                                                                                                                                                                                                                                                                                                                                                                                                                                                                                          | -7.26  | 31.82 | 5.15 | P |  | IN  |
| QLO3174 | 2,2,3,3,4,4,4-Heptafluorobutyl-2-chloroprop-2-enoate             | 74359-14-1   | FC(F)(F)C(F)C(F)C(F)COC(=O)C(Cl)=C                                                                                                                                                                                                                                                                                                                                                                                                                                                                                                                                                                                                                                                                                                                                                                                                                                                                                                                                                                                                                                                                                                                                                                                                                                                                                                                                                                                                                                                                                                                                                                                                                                                                                                                                                                                                                                                                                                                                                                                                                                                                                                                                                                                                                                                                                                                                                                                                                                                                                                                                                                                                                                                                                                                                                                                                                                                                                                                                                                                                                                                                                                                                                                                                                                                                                                                                                                                                                                                                                                                                                                                                                                                                                                                                                                                                                                                                                                                                                                                                                                                                                                                                                                                                                                                                                                                                                                                                                                                                                                                                                                                                                                                                                                                                                                                                                                                                                                                                                                                                                                                                                                                                                        | -7.16  | 38.10 | 5.04 | P |  | IN  |
| QLO3175 | 2,2,3,3,4,4,4-Heptafluorobutyl-2-chloroprop-2-enoate             | 308-45-2     | FC(F)(F)C(F)C(F)C(F)COC(=O)C(F)C(F)C(F)C(F)F                                                                                                                                                                                                                                                                                                                                                                                                                                                                                                                                                                                                                                                                                                                                                                                                                                                                                                                                                                                                                                                                                                                                                                                                                                                                                                                                                                                                                                                                                                                                                                                                                                                                                                                                                                                                                                                                                                                                                                                                                                                                                                                                                                                                                                                                                                                                                                                                                                                                                                                                                                                                                                                                                                                                                                                                                                                                                                                                                                                                                                                                                                                                                                                                                                                                                                                                                                                                                                                                                                                                                                                                                                                                                                                                                                                                                                                                                                                                                                                                                                                                                                                                                                                                                                                                                                                                                                                                                                                                                                                                                                                                                                                                                                                                                                                                                                                                                                                                                                                                                                                                                                                                              | -8.92  | 53.85 | 5.71 | P |  | IN  |
| QLO3176 | 1H,1H-Perfluorobutyl acrylate                                    | 424-64-6     | FC(F)(F)C(F)C(F)C(F)COC(=O)C=C                                                                                                                                                                                                                                                                                                                                                                                                                                                                                                                                                                                                                                                                                                                                                                                                                                                                                                                                                                                                                                                                                                                                                                                                                                                                                                                                                                                                                                                                                                                                                                                                                                                                                                                                                                                                                                                                                                                                                                                                                                                                                                                                                                                                                                                                                                                                                                                                                                                                                                                                                                                                                                                                                                                                                                                                                                                                                                                                                                                                                                                                                                                                                                                                                                                                                                                                                                                                                                                                                                                                                                                                                                                                                                                                                                                                                                                                                                                                                                                                                                                                                                                                                                                                                                                                                                                                                                                                                                                                                                                                                                                                                                                                                                                                                                                                                                                                                                                                                                                                                                                                                                                                                            | -6.81  | 33.33 | 4.92 | P |  | IN  |
| QLO3177 | Bis(1H,1H-perfluorobutyl)fumarate                                | 24120-17-0   | FC(F)(F)C(F)C(F)C(F)COC(=O)C=CC(=O)OC(F)(F)C(F)C(F)C(F)F                                                                                                                                                                                                                                                                                                                                                                                                                                                                                                                                                                                                                                                                                                                                                                                                                                                                                                                                                                                                                                                                                                                                                                                                                                                                                                                                                                                                                                                                                                                                                                                                                                                                                                                                                                                                                                                                                                                                                                                                                                                                                                                                                                                                                                                                                                                                                                                                                                                                                                                                                                                                                                                                                                                                                                                                                                                                                                                                                                                                                                                                                                                                                                                                                                                                                                                                                                                                                                                                                                                                                                                                                                                                                                                                                                                                                                                                                                                                                                                                                                                                                                                                                                                                                                                                                                                                                                                                                                                                                                                                                                                                                                                                                                                                                                                                                                                                                                                                                                                                                                                                                                                                  | -9.54  | 38.89 | 6.14 | P |  | IN  |
| QLO3178 | 2,2,3,3,4,4,4-Heptafluorobutyl 1,2,3-benzothiadiazole-7-carbo    | 1384278-50-5 | FC(F)(F)C(F)C(F)C(F)COC(=O)c1cccc2nncs12                                                                                                                                                                                                                                                                                                                                                                                                                                                                                                                                                                                                                                                                                                                                                                                                                                                                                                                                                                                                                                                                                                                                                                                                                                                                                                                                                                                                                                                                                                                                                                                                                                                                                                                                                                                                                                                                                                                                                                                                                                                                                                                                                                                                                                                                                                                                                                                                                                                                                                                                                                                                                                                                                                                                                                                                                                                                                                                                                                                                                                                                                                                                                                                                                                                                                                                                                                                                                                                                                                                                                                                                                                                                                                                                                                                                                                                                                                                                                                                                                                                                                                                                                                                                                                                                                                                                                                                                                                                                                                                                                                                                                                                                                                                                                                                                                                                                                                                                                                                                                                                                                                                                                  | -9.88  | 25.00 | 6.44 | P |  | OUT |
| QLO3179 | 2,2,3,3,4,4,4-Heptafluorobutyl but-3-enoate                      | 17165-56-9   | FC(F)(F)C(F)C(F)C(F)COC(=O)C=CC=C                                                                                                                                                                                                                                                                                                                                                                                                                                                                                                                                                                                                                                                                                                                                                                                                                                                                                                                                                                                                                                                                                                                                                                                                                                                                                                                                                                                                                                                                                                                                                                                                                                                                                                                                                                                                                                                                                                                                                                                                                                                                                                                                                                                                                                                                                                                                                                                                                                                                                                                                                                                                                                                                                                                                                                                                                                                                                                                                                                                                                                                                                                                                                                                                                                                                                                                                                                                                                                                                                                                                                                                                                                                                                                                                                                                                                                                                                                                                                                                                                                                                                                                                                                                                                                                                                                                                                                                                                                                                                                                                                                                                                                                                                                                                                                                                                                                                                                                                                                                                                                                                                                                                                         | -6.97  | 29.17 | 5.04 | P |  | OUT |
| QLO3180 | 1-Aziridinepropionic acid, 2,2,3,3,4,4,4-heptafluorobutyl ester  | 24160-20-1   | FC(F)(F)C(F)C(F)C(F)COC(=O)CCN1CC1                                                                                                                                                                                                                                                                                                                                                                                                                                                                                                                                                                                                                                                                                                                                                                                                                                                                                                                                                                                                                                                                                                                                                                                                                                                                                                                                                                                                                                                                                                                                                                                                                                                                                                                                                                                                                                                                                                                                                                                                                                                                                                                                                                                                                                                                                                                                                                                                                                                                                                                                                                                                                                                                                                                                                                                                                                                                                                                                                                                                                                                                                                                                                                                                                                                                                                                                                                                                                                                                                                                                                                                                                                                                                                                                                                                                                                                                                                                                                                                                                                                                                                                                                                                                                                                                                                                                                                                                                                                                                                                                                                                                                                                                                                                                                                                                                                                                                                                                                                                                                                                                                                                                                        | -7.69  | 24.14 | 5.42 | P |  | OUT |
| QLO3181 | Bis(2,2,3,3,4,4,4-heptafluorobutyl) carbonate                    | 1026739-75-2 | FC(F)(F)C(F)C(F)C(F)COC(=O)OC(F)(F)C(F)C(F)C(F)F                                                                                                                                                                                                                                                                                                                                                                                                                                                                                                                                                                                                                                                                                                                                                                                                                                                                                                                                                                                                                                                                                                                                                                                                                                                                                                                                                                                                                                                                                                                                                                                                                                                                                                                                                                                                                                                                                                                                                                                                                                                                                                                                                                                                                                                                                                                                                                                                                                                                                                                                                                                                                                                                                                                                                                                                                                                                                                                                                                                                                                                                                                                                                                                                                                                                                                                                                                                                                                                                                                                                                                                                                                                                                                                                                                                                                                                                                                                                                                                                                                                                                                                                                                                                                                                                                                                                                                                                                                                                                                                                                                                                                                                                                                                                                                                                                                                                                                                                                                                                                                                                                                                                          | -9.10  | 46.67 | 5.86 | P |  | IN  |
| QLO3182 | 2,2,3,3,4,4,4-Heptafluorobutyl carbonochloridate                 | 108156-21-4  | FC(F)(F)C(F)C(F)C(F)COC(Cl)=O                                                                                                                                                                                                                                                                                                                                                                                                                                                                                                                                                                                                                                                                                                                                                                                                                                                                                                                                                                                                                                                                                                                                                                                                                                                                                                                                                                                                                                                                                                                                                                                                                                                                                                                                                                                                                                                                                                                                                                                                                                                                                                                                                                                                                                                                                                                                                                                                                                                                                                                                                                                                                                                                                                                                                                                                                                                                                                                                                                                                                                                                                                                                                                                                                                                                                                                                                                                                                                                                                                                                                                                                                                                                                                                                                                                                                                                                                                                                                                                                                                                                                                                                                                                                                                                                                                                                                                                                                                                                                                                                                                                                                                                                                                                                                                                                                                                                                                                                                                                                                                                                                                                                                             | -6.83  | 47.06 | 4.80 | P |  | IN  |
| QLO3183 | 4-(Ethenyloxy)-1,1,2,2,3,3-heptafluorobutane                     | 356-00-3     | FC(F)(F)C(F)C(F)C(F)COC=C                                                                                                                                                                                                                                                                                                                                                                                                                                                                                                                                                                                                                                                                                                                                                                                                                                                                                                                                                                                                                                                                                                                                                                                                                                                                                                                                                                                                                                                                                                                                                                                                                                                                                                                                                                                                                                                                                                                                                                                                                                                                                                                                                                                                                                                                                                                                                                                                                                                                                                                                                                                                                                                                                                                                                                                                                                                                                                                                                                                                                                                                                                                                                                                                                                                                                                                                                                                                                                                                                                                                                                                                                                                                                                                                                                                                                                                                                                                                                                                                                                                                                                                                                                                                                                                                                                                                                                                                                                                                                                                                                                                                                                                                                                                                                                                                                                                                                                                                                                                                                                                                                                                                                                 | -6.34  | 36.84 | 4.66 | P |  | IN  |
| QLO3184 | 1-Ethenyl-4-(2,2,3,3,4,4,4-heptafluorobutoxy)benzene             | 111144-99-1  | FC(F)(F)C(F)C(F)C(F)COC1=CC=C(C=C)C=C1                                                                                                                                                                                                                                                                                                                                                                                                                                                                                                                                                                                                                                                                                                                                                                                                                                                                                                                                                                                                                                                                                                                                                                                                                                                                                                                                                                                                                                                                                                                                                                                                                                                                                                                                                                                                                                                                                                                                                                                                                                                                                                                                                                                                                                                                                                                                                                                                                                                                                                                                                                                                                                                                                                                                                                                                                                                                                                                                                                                                                                                                                                                                                                                                                                                                                                                                                                                                                                                                                                                                                                                                                                                                                                                                                                                                                                                                                                                                                                                                                                                                                                                                                                                                                                                                                                                                                                                                                                                                                                                                                                                                                                                                                                                                                                                                                                                                                                                                                                                                                                                                                                                                                    | -8.43  | 24.14 | 5.72 | P |  | OUT |
| QLO3185 | 2-[(4-(Perfluorobutoxy)pyridin-2-yl)methanesulfinyl]-1H-thien    | NOCAS_869668 | FC(F)(F)C(F)C(F)C(F)COC1=C=C(NC(=O)C2=CC=CC=C3N2)=C1                                                                                                                                                                                                                                                                                                                                                                                                                                                                                                                                                                                                                                                                                                                                                                                                                                                                                                                                                                                                                                                                                                                                                                                                                                                                                                                                                                                                                                                                                                                                                                                                                                                                                                                                                                                                                                                                                                                                                                                                                                                                                                                                                                                                                                                                                                                                                                                                                                                                                                                                                                                                                                                                                                                                                                                                                                                                                                                                                                                                                                                                                                                                                                                                                                                                                                                                                                                                                                                                                                                                                                                                                                                                                                                                                                                                                                                                                                                                                                                                                                                                                                                                                                                                                                                                                                                                                                                                                                                                                                                                                                                                                                                                                                                                                                                                                                                                                                                                                                                                                                                                                                                                      | -11.47 | 17.95 | 7.25 | P |  | OUT |
| QLO3186 | 4-(2,2,3,3,4,4,4-Heptafluorobutoxy)benzaldehyde                  | 943767-44-0  | FC(F)(F)C(F)C(F)C(F)COC1cccc(C=O)cc1                                                                                                                                                                                                                                                                                                                                                                                                                                                                                                                                                                                                                                                                                                                                                                                                                                                                                                                                                                                                                                                                                                                                                                                                                                                                                                                                                                                                                                                                                                                                                                                                                                                                                                                                                                                                                                                                                                                                                                                                                                                                                                                                                                                                                                                                                                                                                                                                                                                                                                                                                                                                                                                                                                                                                                                                                                                                                                                                                                                                                                                                                                                                                                                                                                                                                                                                                                                                                                                                                                                                                                                                                                                                                                                                                                                                                                                                                                                                                                                                                                                                                                                                                                                                                                                                                                                                                                                                                                                                                                                                                                                                                                                                                                                                                                                                                                                                                                                                                                                                                                                                                                                                                      | -8.47  | 25.93 | 5.77 | P |  | OUT |
| QLO3187 | 4-(2,2,3,3,4,4,4-Heptafluorobutoxy)benzonitrile                  | 96308-32-6   | FC(F)(F)C(F)C(F)C(F)COC1cccc(cc#N)CN                                                                                                                                                                                                                                                                                                                                                                                                                                                                                                                                                                                                                                                                                                                                                                                                                                                                                                                                                                                                                                                                                                                                                                                                                                                                                                                                                                                                                                                                                                                                                                                                                                                                                                                                                                                                                                                                                                                                                                                                                                                                                                                                                                                                                                                                                                                                                                                                                                                                                                                                                                                                                                                                                                                                                                                                                                                                                                                                                                                                                                                                                                                                                                                                                                                                                                                                                                                                                                                                                                                                                                                                                                                                                                                                                                                                                                                                                                                                                                                                                                                                                                                                                                                                                                                                                                                                                                                                                                                                                                                                                                                                                                                                                                                                                                                                                                                                                                                                                                                                                                                                                                                                                      | -8.49  | 26.92 | 5.77 | P |  | OUT |
| QLO3188 | 1,1,1,2,2,3,3-Heptafluoro-4-(2,2,3,3,4,4,4-heptafluorobutoxy)    | 647-91-6     | FC(F)(F)C(F)C(F)C(F)COC(C(F)(F)C(F)C(F)C(F)F)                                                                                                                                                                                                                                                                                                                                                                                                                                                                                                                                                                                                                                                                                                                                                                                                                                                                                                                                                                                                                                                                                                                                                                                                                                                                                                                                                                                                                                                                                                                                                                                                                                                                                                                                                                                                                                                                                                                                                                                                                                                                                                                                                                                                                                                                                                                                                                                                                                                                                                                                                                                                                                                                                                                                                                                                                                                                                                                                                                                                                                                                                                                                                                                                                                                                                                                                                                                                                                                                                                                                                                                                                                                                                                                                                                                                                                                                                                                                                                                                                                                                                                                                                                                                                                                                                                                                                                                                                                                                                                                                                                                                                                                                                                                                                                                                                                                                                                                                                                                                                                                                                                                                             | -8.70  | 51.85 | 5.62 | P |  | IN  |
| QLO3189 | Allyl 1H,1H-heptafluorobutyl ether                               | 648-42-0     | FC(F)(F)C(F)C(F)C(F)COC=C                                                                                                                                                                                                                                                                                                                                                                                                                                                                                                                                                                                                                                                                                                                                                                                                                                                                                                                                                                                                                                                                                                                                                                                                                                                                                                                                                                                                                                                                                                                                                                                                                                                                                                                                                                                                                                                                                                                                                                                                                                                                                                                                                                                                                                                                                                                                                                                                                                                                                                                                                                                                                                                                                                                                                                                                                                                                                                                                                                                                                                                                                                                                                                                                                                                                                                                                                                                                                                                                                                                                                                                                                                                                                                                                                                                                                                                                                                                                                                                                                                                                                                                                                                                                                                                                                                                                                                                                                                                                                                                                                                                                                                                                                                                                                                                                                                                                                                                                                                                                                                                                                                                                                                 | -6.51  | 31.82 | 4.80 | P |  | IN  |
| QLO3190 | NSC221106                                                        | 59727-25-2   | FC(F)(F)C(F)C(F)C(F)COC(C1=CNC(=O)N1)=O                                                                                                                                                                                                                                                                                                                                                                                                                                                                                                                                                                                                                                                                                                                                                                                                                                                                                                                                                                                                                                                                                                                                                                                                                                                                                                                                                                                                                                                                                                                                                                                                                                                                                                                                                                                                                                                                                                                                                                                                                                                                                                                                                                                                                                                                                                                                                                                                                                                                                                                                                                                                                                                                                                                                                                                                                                                                                                                                                                                                                                                                                                                                                                                                                                                                                                                                                                                                                                                                                                                                                                                                                                                                                                                                                                                                                                                                                                                                                                                                                                                                                                                                                                                                                                                                                                                                                                                                                                                                                                                                                                                                                                                                                                                                                                                                                                                                                                                                                                                                                                                                                                                                                   | -8.63  | 25.00 | 5.86 | P |  | OUT |
| QLO3191 | 2-[(2,2,3,3,4,4,4-Heptafluorobutoxy)methyl]oxirane               | 648-43-1     | FC(F)(F)C(F)C(F)C(F)COC(C1CO1)                                                                                                                                                                                                                                                                                                                                                                                                                                                                                                                                                                                                                                                                                                                                                                                                                                                                                                                                                                                                                                                                                                                                                                                                                                                                                                                                                                                                                                                                                                                                                                                                                                                                                                                                                                                                                                                                                                                                                                                                                                                                                                                                                                                                                                                                                                                                                                                                                                                                                                                                                                                                                                                                                                                                                                                                                                                                                                                                                                                                                                                                                                                                                                                                                                                                                                                                                                                                                                                                                                                                                                                                                                                                                                                                                                                                                                                                                                                                                                                                                                                                                                                                                                                                                                                                                                                                                                                                                                                                                                                                                                                                                                                                                                                                                                                                                                                                                                                                                                                                                                                                                                                                                            | -7.16  | 30.43 | 5.11 | P |  | OUT |
| QLO3192 | 4-[(2,2,3,3,4,4,4-Heptafluorobutoxy)methyl]-1,3-dioxolan-2-o     | 181044-06-4  | FC(F)(F)C(F)C(F)C(F)COC(C1COC(=O)O1)                                                                                                                                                                                                                                                                                                                                                                                                                                                                                                                                                                                                                                                                                                                                                                                                                                                                                                                                                                                                                                                                                                                                                                                                                                                                                                                                                                                                                                                                                                                                                                                                                                                                                                                                                                                                                                                                                                                                                                                                                                                                                                                                                                                                                                                                                                                                                                                                                                                                                                                                                                                                                                                                                                                                                                                                                                                                                                                                                                                                                                                                                                                                                                                                                                                                                                                                                                                                                                                                                                                                                                                                                                                                                                                                                                                                                                                                                                                                                                                                                                                                                                                                                                                                                                                                                                                                                                                                                                                                                                                                                                                                                                                                                                                                                                                                                                                                                                                                                                                                                                                                                                                                                      | -8.12  | 26.92 | 5.60 | P |  | OUT |
| QLO3193 | 4-(2-Chloroethoxy)-1,1,1,2,2,3,3-heptafluorobutane               | 679-53-8     | FC(F)(F)C(F)C(F)C(F)COC(Cl)                                                                                                                                                                                                                                                                                                                                                                                                                                                                                                                                                                                                                                                                                                                                                                                                                                                                                                                                                                                                                                                                                                                                                                                                                                                                                                                                                                                                                                                                                                                                                                                                                                                                                                                                                                                                                                                                                                                                                                                                                                                                                                                                                                                                                                                                                                                                                                                                                                                                                                                                                                                                                                                                                                                                                                                                                                                                                                                                                                                                                                                                                                                                                                                                                                                                                                                                                                                                                                                                                                                                                                                                                                                                                                                                                                                                                                                                                                                                                                                                                                                                                                                                                                                                                                                                                                                                                                                                                                                                                                                                                                                                                                                                                                                                                                                                                                                                                                                                                                                                                                                                                                                                                               | -6.64  | 38.10 | 4.80 | P |  | IN  |
| QLO3194 | 2,2,3,3,4,4,4-Heptafluorobutyl diphenylphosphinate               | 55776-72-2   | FC(F)(F)C(F)C(F)C(F)COP(=O)(c1ccccc1)c1ccccc1                                                                                                                                                                                                                                                                                                                                                                                                                                                                                                                                                                                                                                                                                                                                                                                                                                                                                                                                                                                                                                                                                                                                                                                                                                                                                                                                                                                                                                                                                                                                                                                                                                                                                                                                                                                                                                                                                                                                                                                                                                                                                                                                                                                                                                                                                                                                                                                                                                                                                                                                                                                                                                                                                                                                                                                                                                                                                                                                                                                                                                                                                                                                                                                                                                                                                                                                                                                                                                                                                                                                                                                                                                                                                                                                                                                                                                                                                                                                                                                                                                                                                                                                                                                                                                                                                                                                                                                                                                                                                                                                                                                                                                                                                                                                                                                                                                                                                                                                                                                                                                                                                                                                             | -9.68  | 18.42 | 6.41 | P |  | OUT |
| QLO3195 | Bis(2,2,3,3,4,4,4-heptafluorobutyl) phenylphosphonate            | 31430-72-5   | FC(F)(F)C(F)C(F)C(F)COP(=O)(OC(F)(F)C(F)C(F)C(F)F)c1ccccc1                                                                                                                                                                                                                                                                                                                                                                                                                                                                                                                                                                                                                                                                                                                                                                                                                                                                                                                                                                                                                                                                                                                                                                                                                                                                                                                                                                                                                                                                                                                                                                                                                                                                                                                                                                                                                                                                                                                                                                                                                                                                                                                                                                                                                                                                                                                                                                                                                                                                                                                                                                                                                                                                                                                                                                                                                                                                                                                                                                                                                                                                                                                                                                                                                                                                                                                                                                                                                                                                                                                                                                                                                                                                                                                                                                                                                                                                                                                                                                                                                                                                                                                                                                                                                                                                                                                                                                                                                                                                                                                                                                                                                                                                                                                                                                                                                                                                                                                                                                                                                                                                                                                                | -10.23 | 34.15 | 6.51 | P |  | OUT |
| QLO3196 | bis(perfluoropropyl)methyl phosphorochloridoate                  | 6780-81-0    | FC(F)(F)C(F)C(F)C(F)COP(Cl)=OOC(F)(F)C(F)C(F)C(F)F                                                                                                                                                                                                                                                                                                                                                                                                                                                                                                                                                                                                                                                                                                                                                                                                                                                                                                                                                                                                                                                                                                                                                                                                                                                                                                                                                                                                                                                                                                                                                                                                                                                                                                                                                                                                                                                                                                                                                                                                                                                                                                                                                                                                                                                                                                                                                                                                                                                                                                                                                                                                                                                                                                                                                                                                                                                                                                                                                                                                                                                                                                                                                                                                                                                                                                                                                                                                                                                                                                                                                                                                                                                                                                                                                                                                                                                                                                                                                                                                                                                                                                                                                                                                                                                                                                                                                                                                                                                                                                                                                                                                                                                                                                                                                                                                                                                                                                                                                                                                                                                                                                                                        | -9.30  | 48.39 | 5.94 | P |  | IN  |
|         |                                                                  |              | FC(F)(F)C(F)C(F)C(F)COP1(OC(F)(F)C(F)C(F)C(F)F)=NP(OC(F)(F)C(F)C(F)C(F)FOCC(F)(F)C(F)C(F)C(F)F)OC(F)(F)C(F)C(F)C(F)F                                                                                                                                                                                                                                                                                                                                                                                                                                                                                                                                                                                                                                                                                                                                                                                                                                                                                                                                                                                                                                                                                                                                                                                                                                                                                                                                                                                                                                                                                                                                                                                                                                                                                                                                                                                                                                                                                                                                                                                                                                                                                                                                                                                                                                                                                                                                                                                                                                                                                                                                                                                                                                                                                                                                                                                                                                                                                                                                                                                                                                                                                                                                                                                                                                                                                                                                                                                                                                                                                                                                                                                                                                                                                                                                                                                                                                                                                                                                                                                                                                                                                                                                                                                                                                                                                                                                                                                                                                                                                                                                                                                                                                                                                                                                                                                                                                                                                                                                                                                                                                                                      | -14.85 | 46.67 | 8.55 | P |  | OUT |
| QLO3197 | 1,3,5,2,4,6-Triazatriphosphorine, 2,2,4,4,6,6-hexakis(2,2,3,3,4, | 470-73-5     | FC(F)(F)C(F)C(F)C(F)COP(=O)(OC(F)(F)C(F)C(F)C(F)F)=NP(OC(F)(F)C(F)C(F)C(F)FOCC(F)(F)C(F)C(F)C(F)F)OC(F)(F)C(F)C(F)C(F)F                                                                                                                                                                                                                                                                                                                                                                                                                                                                                                                                                                                                                                                                                                                                                                                                                                                                                                                                                                                                                                                                                                                                                                                                                                                                                                                                                                                                                                                                                                                                                                                                                                                                                                                                                                                                                                                                                                                                                                                                                                                                                                                                                                                                                                                                                                                                                                                                                                                                                                                                                                                                                                                                                                                                                                                                                                                                                                                                                                                                                                                                                                                                                                                                                                                                                                                                                                                                                                                                                                                                                                                                                                                                                                                                                                                                                                                                                                                                                                                                                                                                                                                                                                                                                                                                                                                                                                                                                                                                                                                                                                                                                                                                                                                                                                                                                                                                                                                                                                                                                                                                   | -9.55  | 53.33 | 6.01 | P |  | IN  |
| QLO3198 | 1H,1H-Perfluorobutyl perfluorobutanesulfonate                    | 883499-32-9  | FC(F)(F)C(F)C(F)C(F)COS(=O)(=O)C(F)(F)C(F)C(F)C(F)F                                                                                                                                                                                                                                                                                                                                                                                                                                                                                                                                                                                                                                                                                                                                                                                                                                                                                                                                                                                                                                                                                                                                                                                                                                                                                                                                                                                                                                                                                                                                                                                                                                                                                                                                                                                                                                                                                                                                                                                                                                                                                                                                                                                                                                                                                                                                                                                                                                                                                                                                                                                                                                                                                                                                                                                                                                                                                                                                                                                                                                                                                                                                                                                                                                                                                                                                                                                                                                                                                                                                                                                                                                                                                                                                                                                                                                                                                                                                                                                                                                                                                                                                                                                                                                                                                                                                                                                                                                                                                                                                                                                                                                                                                                                                                                                                                                                                                                                                                                                                                                                                                                                                       | -7.82  | 47.62 | 5.25 | P |  | IN  |
| QLO3199 | 1H,1H-Heptafluorobutyl triflate                                  | 6401-01-0    | FC(F)(F)C(F)C(F)C(F)COS(=O)(=O)C(F)F                                                                                                                                                                                                                                                                                                                                                                                                                                                                                                                                                                                                                                                                                                                                                                                                                                                                                                                                                                                                                                                                                                                                                                                                                                                                                                                                                                                                                                                                                                                                                                                                                                                                                                                                                                                                                                                                                                                                                                                                                                                                                                                                                                                                                                                                                                                                                                                                                                                                                                                                                                                                                                                                                                                                                                                                                                                                                                                                                                                                                                                                                                                                                                                                                                                                                                                                                                                                                                                                                                                                                                                                                                                                                                                                                                                                                                                                                                                                                                                                                                                                                                                                                                                                                                                                                                                                                                                                                                                                                                                                                                                                                                                                                                                                                                                                                                                                                                                                                                                                                                                                                                                                                      | -9.55  | 25.00 | 5.60 | P |  | OUT |
| QLO3200 | [(2,2,3,3,4,4-Heptafluorobutyl)sulfanyl]methyl]benzene           | 200337-06-0  | FC(F)(F)C(F)C(F)C(F)CSC1ccccc1                                                                                                                                                                                                                                                                                                                                                                                                                                                                                                                                                                                                                                                                                                                                                                                                                                                                                                                                                                                                                                                                                                                                                                                                                                                                                                                                                                                                                                                                                                                                                                                                                                                                                                                                                                                                                                                                                                                                                                                                                                                                                                                                                                                                                                                                                                                                                                                                                                                                                                                                                                                                                                                                                                                                                                                                                                                                                                                                                                                                                                                                                                                                                                                                                                                                                                                                                                                                                                                                                                                                                                                                                                                                                                                                                                                                                                                                                                                                                                                                                                                                                                                                                                                                                                                                                                                                                                                                                                                                                                                                                                                                                                                                                                                                                                                                                                                                                                                                                                                                                                                                                                                                                            | -8.09  | 72.73 | 4.20 | P |  | OUT |
| QLO3201 | Perflutren                                                       | 76-19-7      | FC(F)(F)C(F)C(F)C(F)F                                                                                                                                                                                                                                                                                                                                                                                                                                                                                                                                                                                                                                                                                                                                                                                                                                                                                                                                                                                                                                                                                                                                                                                                                                                                                                                                                                                                                                                                                                                                                                                                                                                                                                                                                                                                                                                                                                                                                                                                                                                                                                                                                                                                                                                                                                                                                                                                                                                                                                                                                                                                                                                                                                                                                                                                                                                                                                                                                                                                                                                                                                                                                                                                                                                                                                                                                                                                                                                                                                                                                                                                                                                                                                                                                                                                                                                                                                                                                                                                                                                                                                                                                                                                                                                                                                                                                                                                                                                                                                                                                                                                                                                                                                                                                                                                                                                                                                                                                                                                                                                                                                                                                                     | -6.10  | 72.73 | 4.20 | P |  | OUT |
| QLO3202 | Heptafluoropropyl iodide                                         | 754-34-7     | FC(F)(F)C(F)C(F)C(F)I                                                                                                                                                                                                                                                                                                                                                                                                                                                                                                                                                                                                                                                                                                                                                                                                                                                                                                                                                                                                                                                                                                                                                                                                                                                                                                                                                                                                                                                                                                                                                                                                                                                                                                                                                                                                                                                                                                                                                                                                                                                                                                                                                                                                                                                                                                                                                                                                                                                                                                                                                                                                                                                                                                                                                                                                                                                                                                                                                                                                                                                                                                                                                                                                                                                                                                                                                                                                                                                                                                                                                                                                                                                                                                                                                                                                                                                                                                                                                                                                                                                                                                                                                                                                                                                                                                                                                                                                                                                                                                                                                                                                                                                                                                                                                                                                                                                                                                                                                                                                                                                                                                                                                                     | -6.10  | 72.73 | 4.20 | P |  | OUT |
|         |                                                                  |              | FC(F)(F)C(F)C(F)C(F)C(F)C(F)C(F)C(F)C(F)C(F)C(F)C(F)C(F)C(F)C(F)C(F)C(F)C(F)C(F)C(F)C(F)C(F)C(F)C(F)C(F)C(F)C(F)C(F)C(F)C(F)C(F)C(F)C(F)C(F)C(F)C(F)C(F)C(F)C(F)C(F)C(F)C(F)C(F)C(F)C(F)C(F)C(F)C(F)C(F)C(F)C(F)C(F)C(F)C(F)C(F)C(F)C(F)C(F)C(F)C(F)C(F)C(F)C(F)C(F)C(F)C(F)C(F)C(F)C(F)C(F)C(F)C(F)C(F)C(F)C(F)C(F)C(F)C(F)C(F)C(F)C(F)C(F)C(F)C(F)C(F)C(F)C(F)C(F)C(F)C(F)C(F)C(F)C(F)C(F)C(F)C(F)C(F)C(F)C(F)C(F)C(F)C(F)C(F)C(F)C(F)C(F)C(F)C(F)C(F)C(F)C(F)C(F)C(F)C(F)C(F)C(F)C(F)C(F)C(F)C(F)C(F)C(F)C(F)C(F)C(F)C(F)C(F)C(F)C(F)C(F)C(F)C(F)C(F)C(F)C(F)C(F)C(F)C(F)C(F)C(F)C(F)C(F)C(F)C(F)C(F)C(F)C(F)C(F)C(F)C(F)C(F)C(F)C(F)C(F)C(F)C(F)C(F)C(F)C(F)C(F)C(F)C(F)C(F)C(F)C(F)C(F)C(F)C(F)C(F)C(F)C(F)C(F)C(F)C(F)C(F)C(F)C(F)C(F)C(F)C(F)C(F)C(F)C(F)C(F)C(F)C(F)C(F)C(F)C(F)C(F)C(F)C(F)C(F)C(F)C(F)C(F)C(F)C(F)C(F)C(F)C(F)C(F)C(F)C(F)C(F)C(F)C(F)C(F)C(F)C(F)C(F)C(F)C(F)C(F)C(F)C(F)C(F)C(F)C(F)C(F)C(F)C(F)C(F)C(F)C(F)C(F)C(F)C(F)C(F)C(F)C(F)C(F)C(F)C(F)C(F)C(F)C(F)C(F)C(F)C(F)C(F)C(F)C(F)C(F)C(F)C(F)C(F)C(F)C(F)C(F)C(F)C(F)C(F)C(F)C(F)C(F)C(F)C(F)C(F)C(F)C(F)C(F)C(F)C(F)C(F)C(F)C(F)C(F)C(F)C(F)C(F)C(F)C(F)C(F)C(F)C(F)C(F)C(F)C(F)C(F)C(F)C(F)C(F)C(F)C(F)C(F)C(F)C(F)C(F)C(F)C(F)C(F)C(F)C(F)C(F)C(F)C(F)C(F)C(F)C(F)C(F)C(F)C(F)C(F)C(F)C(F)C(F)C(F)C(F)C(F)C(F)C(F)C(F)C(F)C(F)C(F)C(F)C(F)C(F)C(F)C(F)C(F)C(F)C(F)C(F)C(F)C(F)C(F)C(F)C(F)C(F)C(F)C(F)C(F)C(F)C(F)C(F)C(F)C(F)C(F)C(F)C(F)C(F)C(F)C(F)C(F)C(F)C(F)C(F)C(F)C(F)C(F)C(F)C(F)C(F)C(F)C(F)C(F)C(F)C(F)C(F)C(F)C(F)C(F)C(F)C(F)C(F)C(F)C(F)C(F)C(F)C(F)C(F)C(F)C(F)C(F)C(F)C(F)C(F)C(F)C(F)C(F)C(F)C(F)C(F)C(F)C(F)C(F)C(F)C(F)C(F)C(F)C(F)C(F)C(F)C(F)C(F)C(F)C(F)C(F)C(F)C(F)C(F)C(F)C(F)C(F)C(F)C(F)C(F)C(F)C(F)C(F)C(F)C(F)C(F)C(F)C(F)C(F)C(F)C(F)C(F)C(F)C(F)C(F)C(F)C(F)C(F)C(F)C(F)C(F)C(F)C(F)C(F)C(F)C(F)C(F)C(F)C(F)C(F)C(F)C(F)C(F)C(F)C(F)C(F)C(F)C(F)C(F)C(F)C(F)C(F)C(F)C(F)C(F)C(F)C(F)C(F)C(F)C(F)C(F)C(F)C(F)C(F)C(F)C(F)C(F)C(F)C(F)C(F)C(F)C(F)C(F)C(F)C(F)C(F)C(F)C(F)C(F)C(F)C(F)C(F)C(F)C(F)C(F)C(F)C(F)C(F)C(F)C(F)C(F)C(F)C(F)C(F)C(F)C(F)C(F)C(F)C(F)C(F)C(F)C(F)C(F)C(F)C(F)C(F)C(F)C(F)C(F)C(F)C(F)C(F)C(F)C(F)C(F)C(F)C(F)C(F)C(F)C(F)C(F)C(F)C(F)C(F)C(F)C(F)C(F)C(F)C(F)C(F)C(F)C(F)C(F)C(F)C(F)C(F)C(F)C(F)C(F)C(F)C(F)C(F)C(F)C(F)C(F)C(F)C(F)C(F)C(F)C(F)C(F)C(F)C(F)C(F)C(F)C(F)C(F)C(F)C(F)C(F)C(F)C(F)C(F)C(F)C(F)C(F)C(F)C(F)C(F)C(F)C(F)C(F)C(F)C(F)C(F)C(F)C(F)C(F)C(F)C(F)C(F)C(F)C(F)C(F)C(F)C(F)C(F)C(F)C(F)C(F)C(F)C(F)C(F)C(F)C(F)C(F)C(F)C(F)C(F)C(F)C(F)C(F)C(F)C(F)C(F)C(F)C(F)C(F)C(F)C(F)C(F)C(F)C(F)C(F)C(F)C(F)C(F)C(F)C(F)C(F)C(F)C(F)C(F)C(F)C(F)C(F)C(F)C(F)C(F)C(F)C(F)C(F)C(F)C(F)C(F)C(F)C(F)C(F)C(F)C(F)C(F)C(F)C(F)C(F)C(F)C(F)C(F)C(F)C(F)C(F)C(F)C(F)C(F)C(F)C(F)C(F)C(F)C(F)C(F)C(F)C(F)C(F)C(F)C(F)C(F)C(F)C(F)C(F)C(F)C(F)C(F)C(F)C(F)C(F)C(F)C(F)C(F)C(F)C(F)C(F)C(F)C(F)C(F)C(F)C(F)C(F)C(F)C(F)C(F)C(F)C(F)C(F)C(F)C(F)C(F)C(F)C(F)C(F)C(F)C(F)C(F)C(F)C(F)C(F)C(F)C(F)C(F)C(F)C(F)C(F)C(F)C(F)C(F)C(F)C(F)C(F)C(F)C(F)C(F)C(F)C(F)C(F)C(F)C(F)C(F)C(F)C(F)C(F)C(F)C(F)C(F)C(F)C(F)C(F)C(F)C(F)C(F)C(F)C(F)C(F)C(F)C(F)C(F)C(F)C(F)C(F)C(F)C(F)C(F)C(F)C(F)C(F)C(F)C(F)C(F)C(F)C(F)C(F)C(F)C(F)C(F)C(F)C(F)C(F)C(F)C(F)C(F)C(F)C(F)C(F)C(F)C(F)C(F)C(F)C(F)C(F)C(F)C(F)C(F)C(F)C(F)C(F)C(F)C(F)C(F)C(F)C(F)C(F)C(F)C(F)C(F)C(F)C(F)C(F)C(F)C(F)C(F)C(F)C(F)C(F)C(F)C(F)C(F)C(F)C(F)C(F)C(F)C(F)C(F)C(F)C(F)C(F)C(F)C(F)C(F)C(F)C(F)C(F)C(F)C(F)C(F)C(F)C(F)C(F)C(F)C(F)C(F)C(F)C(F)C(F)C(F)C(F)C(F)C(F)C(F)C(F)C(F)C(F)C(F)C(F)C(F)C(F)C(F)C(F)C(F)C(F)C(F)C(F)C(F)C(F)C(F)C(F)C(F)C(F)C(F)C(F)C(F)C(F)C(F)C(F)C(F)C(F)C(F)C(F)C(F)C(F)C(F)C(F)C(F)C(F)C(F)C(F)C(F)C(F)C(F)C(F)C(F)C(F)C(F)C(F)C(F)C(F)C(F)C(F)C(F)C(F)C(F)C(F)C(F)C(F)C(F)C(F)C(F)C(F)C(F)C(F)C(F)C(F)C(F)C(F)C(F)C(F)C(F)C(F)C(F)C(F)C(F)C(F)C(F)C(F)C(F)C(F)C(F)C(F)C(F)C(F)C(F)C(F)C(F)C(F)C(F)C(F)C(F)C(F)C(F)C(F)C(F)C(F)C(F)C(F)C(F)C(F)C(F)C(F)C(F)C(F)C(F)C(F)C(F)C(F)C(F)C(F)C(F)C(F)C(F)C(F)C(F)C(F)C(F)C(F)C(F)C(F)C(F)C(F)C(F)C(F)C(F)C(F)C(F)C(F)C(F)C(F)C(F)C(F)C(F)C(F)C(F)C(F)C(F)C(F)C(F)C(F)C(F)C(F)C(F)C(F)C(F)C(F)C(F)C(F)C(F)C(F)C(F)C(F)C(F)C(F)C(F)C(F)C(F)C(F)C(F)C(F)C(F)C(F)C(F)C(F)C(F)C(F)C(F)C(F)C(F)C(F)C(F)C(F)C(F)C(F)C(F)C(F)C(F)C(F)C(F)C(F)C(F)C(F)C(F)C(F)C(F)C(F)C(F)C(F)C(F)C(F)C(F)C(F)C(F)C(F)C(F)C(F)C(F)C(F)C(F)C(F)C(F)C(F)C(F)C(F)C(F)C(F)C(F)C(F)C(F)C(F)C(F)C(F)C(F)C(F)C(F)C(F)C(F)C(F)C(F)C(F)C(F)C(F)C(F)C(F)C(F)C(F)C(F)C(F)C(F)C(F)C(F)C(F)C(F)C(F)C(F)C(F)C(F)C(F)C(F)C(F)C(F)C(F)C(F)C(F)C(F)C(F)C(F)C(F)C(F)C(F)C(F)C(F)C(F)C(F)C(F)C(F)C(F)C(F)C(F)C(F)C(F)C(F)C(F)C(F)C(F)C(F)C(F)C(F)C(F)C(F)C(F)C(F)C(F)C(F)C(F)C(F)C(F)C(F)C(F)C(F)C(F)C(F)C(F)C(F)C(F)C(F)C(F)C(F)C(F)C(F)C(F)C(F)C(F)C(F)C(F)C(F)C(F)C(F)C(F)C(F)C(F)C(F)C(F)C(F)C(F)C(F)C(F)C(F)C(F)C(F)C(F)C(F)C(F)C(F)C(F)C(F)C(F)C(F)C(F)C(F)C(F)C(F)C(F)C(F)C(F)C(F)C(F)C(F)C(F)C(F)C(F)C(F)C(F)C(F)C(F)C(F)C(F)C(F)C(F)C(F)C(F)C(F)C(F)C(F)C(F)C(F)C(F)C(F)C(F)C(F)C(F)C(F)C(F)C(F)C(F)C(F)C(F)C(F)C(F)C(F)C(F)C(F)C(F)C(F)C(F)C(F)C(F)C(F)C(F)C(F)C(F)C(F)C(F)C(F)C(F)C(F)C(F)C(F)C(F)C(F)C(F)C(F)C(F)C(F)C(F)C(F)C(F)C(F)C(F)C(F)C(F)C(F)C(F)C(F)C(F)C(F)C(F)C(F)C(F)C(F)C(F)C(F)C(F)C(F)C(F)C(F)C(F)C(F)C(F)C(F)C(F)C(F)C(F)C(F)C |        |       |      |   |  |     |



[illegible]



[illegible]



[illegible]



[illegible]



[illegible]



[illegible]



|         |                                                                |              |                                                                                                                                                                                                                                                                                                                                                                                                                                                                                                                                                                                                                                                                                                                                                                                                                                                                                                                                                                                                                                                                                                                                                                                                                                                                                                                                                                                                                                                                                                                                                                                                                                                                                                                                                                                                                                                                                                                                                                                                                                                                                                                                                                                                                                                                                                                                                                                                                                                                                                                                                                                                                                                                                                                                                                                                                                                                                                                                                                                                                                                                                                                                                                                                                                                                                                                                                                                                                                                                                                                                                                                                                                                                                                                                                                                                                                                                                                                                                                                                                                                                                                                                                                                                                                                                                                                                                                                                                                                                                                                                                                                                                                                                                                                                                                                                                                                                                                                                                                                                                                                                                                                                                                                                                                                                                                                                                                                                                                                                                                                                                                                                                                                                                                                                                                                                                                                                                                                                                                                                                                                                                                                                                                                                                                                                                                                                                                                            |        |       |      |   |  |     |
|---------|----------------------------------------------------------------|--------------|--------------------------------------------------------------------------------------------------------------------------------------------------------------------------------------------------------------------------------------------------------------------------------------------------------------------------------------------------------------------------------------------------------------------------------------------------------------------------------------------------------------------------------------------------------------------------------------------------------------------------------------------------------------------------------------------------------------------------------------------------------------------------------------------------------------------------------------------------------------------------------------------------------------------------------------------------------------------------------------------------------------------------------------------------------------------------------------------------------------------------------------------------------------------------------------------------------------------------------------------------------------------------------------------------------------------------------------------------------------------------------------------------------------------------------------------------------------------------------------------------------------------------------------------------------------------------------------------------------------------------------------------------------------------------------------------------------------------------------------------------------------------------------------------------------------------------------------------------------------------------------------------------------------------------------------------------------------------------------------------------------------------------------------------------------------------------------------------------------------------------------------------------------------------------------------------------------------------------------------------------------------------------------------------------------------------------------------------------------------------------------------------------------------------------------------------------------------------------------------------------------------------------------------------------------------------------------------------------------------------------------------------------------------------------------------------------------------------------------------------------------------------------------------------------------------------------------------------------------------------------------------------------------------------------------------------------------------------------------------------------------------------------------------------------------------------------------------------------------------------------------------------------------------------------------------------------------------------------------------------------------------------------------------------------------------------------------------------------------------------------------------------------------------------------------------------------------------------------------------------------------------------------------------------------------------------------------------------------------------------------------------------------------------------------------------------------------------------------------------------------------------------------------------------------------------------------------------------------------------------------------------------------------------------------------------------------------------------------------------------------------------------------------------------------------------------------------------------------------------------------------------------------------------------------------------------------------------------------------------------------------------------------------------------------------------------------------------------------------------------------------------------------------------------------------------------------------------------------------------------------------------------------------------------------------------------------------------------------------------------------------------------------------------------------------------------------------------------------------------------------------------------------------------------------------------------------------------------------------------------------------------------------------------------------------------------------------------------------------------------------------------------------------------------------------------------------------------------------------------------------------------------------------------------------------------------------------------------------------------------------------------------------------------------------------------------------------------------------------------------------------------------------------------------------------------------------------------------------------------------------------------------------------------------------------------------------------------------------------------------------------------------------------------------------------------------------------------------------------------------------------------------------------------------------------------------------------------------------------------------------------------------------------------------------------------------------------------------------------------------------------------------------------------------------------------------------------------------------------------------------------------------------------------------------------------------------------------------------------------------------------------------------------------------------------------------------------------------------------------------------------------------|--------|-------|------|---|--|-----|
| QLO3649 | 2,2,3,3,4,4,5,5,6,6-Decafluoro-6-[(1,1,1,2,3,3,3-heptafluoropr | 29952-92-9   | NC(=O)C(F)C(F)C(F)C(F)C(F)C(F)C(F)OC(C)(F)C(F)C(F)C(F)F                                                                                                                                                                                                                                                                                                                                                                                                                                                                                                                                                                                                                                                                                                                                                                                                                                                                                                                                                                                                                                                                                                                                                                                                                                                                                                                                                                                                                                                                                                                                                                                                                                                                                                                                                                                                                                                                                                                                                                                                                                                                                                                                                                                                                                                                                                                                                                                                                                                                                                                                                                                                                                                                                                                                                                                                                                                                                                                                                                                                                                                                                                                                                                                                                                                                                                                                                                                                                                                                                                                                                                                                                                                                                                                                                                                                                                                                                                                                                                                                                                                                                                                                                                                                                                                                                                                                                                                                                                                                                                                                                                                                                                                                                                                                                                                                                                                                                                                                                                                                                                                                                                                                                                                                                                                                                                                                                                                                                                                                                                                                                                                                                                                                                                                                                                                                                                                                                                                                                                                                                                                                                                                                                                                                                                                                                                                                    | -9.73  | 54.84 | 6.08 | P |  | IN  |
| QL03640 | Octafluoroadipamide                                            | 355-66-8     | NC(=O)[C](F)(F)C(F)C(F)C(F)C(F)C(F)C(F)N=O                                                                                                                                                                                                                                                                                                                                                                                                                                                                                                                                                                                                                                                                                                                                                                                                                                                                                                                                                                                                                                                                                                                                                                                                                                                                                                                                                                                                                                                                                                                                                                                                                                                                                                                                                                                                                                                                                                                                                                                                                                                                                                                                                                                                                                                                                                                                                                                                                                                                                                                                                                                                                                                                                                                                                                                                                                                                                                                                                                                                                                                                                                                                                                                                                                                                                                                                                                                                                                                                                                                                                                                                                                                                                                                                                                                                                                                                                                                                                                                                                                                                                                                                                                                                                                                                                                                                                                                                                                                                                                                                                                                                                                                                                                                                                                                                                                                                                                                                                                                                                                                                                                                                                                                                                                                                                                                                                                                                                                                                                                                                                                                                                                                                                                                                                                                                                                                                                                                                                                                                                                                                                                                                                                                                                                                                                                                                                 | -7.36  | 36.36 | 5.15 | P |  | IN  |
| QL03641 | Nonafluoropentanamide                                          | 13485-61-5   | NC(=O)C(F)C(F)C(F)C(F)C(F)C(F)F                                                                                                                                                                                                                                                                                                                                                                                                                                                                                                                                                                                                                                                                                                                                                                                                                                                                                                                                                                                                                                                                                                                                                                                                                                                                                                                                                                                                                                                                                                                                                                                                                                                                                                                                                                                                                                                                                                                                                                                                                                                                                                                                                                                                                                                                                                                                                                                                                                                                                                                                                                                                                                                                                                                                                                                                                                                                                                                                                                                                                                                                                                                                                                                                                                                                                                                                                                                                                                                                                                                                                                                                                                                                                                                                                                                                                                                                                                                                                                                                                                                                                                                                                                                                                                                                                                                                                                                                                                                                                                                                                                                                                                                                                                                                                                                                                                                                                                                                                                                                                                                                                                                                                                                                                                                                                                                                                                                                                                                                                                                                                                                                                                                                                                                                                                                                                                                                                                                                                                                                                                                                                                                                                                                                                                                                                                                                                            | -7.16  | 50.00 | 4.92 | P |  | IN  |
| QL03642 | Perfluoropentanamide                                           | 355-81-7     | NC(=O)C(F)C(F)C(F)C(F)C(F)F                                                                                                                                                                                                                                                                                                                                                                                                                                                                                                                                                                                                                                                                                                                                                                                                                                                                                                                                                                                                                                                                                                                                                                                                                                                                                                                                                                                                                                                                                                                                                                                                                                                                                                                                                                                                                                                                                                                                                                                                                                                                                                                                                                                                                                                                                                                                                                                                                                                                                                                                                                                                                                                                                                                                                                                                                                                                                                                                                                                                                                                                                                                                                                                                                                                                                                                                                                                                                                                                                                                                                                                                                                                                                                                                                                                                                                                                                                                                                                                                                                                                                                                                                                                                                                                                                                                                                                                                                                                                                                                                                                                                                                                                                                                                                                                                                                                                                                                                                                                                                                                                                                                                                                                                                                                                                                                                                                                                                                                                                                                                                                                                                                                                                                                                                                                                                                                                                                                                                                                                                                                                                                                                                                                                                                                                                                                                                                | -6.78  | 44.44 | 4.80 | P |  | IN  |
| QL03643 | Heptafluorobutyramide                                          | 662-50-0     | NC(=O)C(F)C(F)C(F)C(F)F                                                                                                                                                                                                                                                                                                                                                                                                                                                                                                                                                                                                                                                                                                                                                                                                                                                                                                                                                                                                                                                                                                                                                                                                                                                                                                                                                                                                                                                                                                                                                                                                                                                                                                                                                                                                                                                                                                                                                                                                                                                                                                                                                                                                                                                                                                                                                                                                                                                                                                                                                                                                                                                                                                                                                                                                                                                                                                                                                                                                                                                                                                                                                                                                                                                                                                                                                                                                                                                                                                                                                                                                                                                                                                                                                                                                                                                                                                                                                                                                                                                                                                                                                                                                                                                                                                                                                                                                                                                                                                                                                                                                                                                                                                                                                                                                                                                                                                                                                                                                                                                                                                                                                                                                                                                                                                                                                                                                                                                                                                                                                                                                                                                                                                                                                                                                                                                                                                                                                                                                                                                                                                                                                                                                                                                                                                                                                                    | -6.24  | 46.67 | 4.52 | P |  | IN  |
| QL03644 | Pentafluoropropanamide                                         | 354-76-7     | NC(=O)C(F)C(F)C(F)F                                                                                                                                                                                                                                                                                                                                                                                                                                                                                                                                                                                                                                                                                                                                                                                                                                                                                                                                                                                                                                                                                                                                                                                                                                                                                                                                                                                                                                                                                                                                                                                                                                                                                                                                                                                                                                                                                                                                                                                                                                                                                                                                                                                                                                                                                                                                                                                                                                                                                                                                                                                                                                                                                                                                                                                                                                                                                                                                                                                                                                                                                                                                                                                                                                                                                                                                                                                                                                                                                                                                                                                                                                                                                                                                                                                                                                                                                                                                                                                                                                                                                                                                                                                                                                                                                                                                                                                                                                                                                                                                                                                                                                                                                                                                                                                                                                                                                                                                                                                                                                                                                                                                                                                                                                                                                                                                                                                                                                                                                                                                                                                                                                                                                                                                                                                                                                                                                                                                                                                                                                                                                                                                                                                                                                                                                                                                                                        | -5.07  | 41.67 | 4.03 | P |  | IN  |
| QL03645 | Propanamide, 3-[1-(difluoro[1,[2,2-trifluoroethenyl]oxy)meth   | 69804-18-8   | NC(=O)C(F)C(F)C(F)C(F)OC(F)C(F)C(F)C(F)C(F)C(F)OC(F)=C(F)F                                                                                                                                                                                                                                                                                                                                                                                                                                                                                                                                                                                                                                                                                                                                                                                                                                                                                                                                                                                                                                                                                                                                                                                                                                                                                                                                                                                                                                                                                                                                                                                                                                                                                                                                                                                                                                                                                                                                                                                                                                                                                                                                                                                                                                                                                                                                                                                                                                                                                                                                                                                                                                                                                                                                                                                                                                                                                                                                                                                                                                                                                                                                                                                                                                                                                                                                                                                                                                                                                                                                                                                                                                                                                                                                                                                                                                                                                                                                                                                                                                                                                                                                                                                                                                                                                                                                                                                                                                                                                                                                                                                                                                                                                                                                                                                                                                                                                                                                                                                                                                                                                                                                                                                                                                                                                                                                                                                                                                                                                                                                                                                                                                                                                                                                                                                                                                                                                                                                                                                                                                                                                                                                                                                                                                                                                                                                 | -8.97  | 48.15 | 5.79 | P |  | IN  |
| QL03646 | 2,2,3,3-Tetrafluoropropanamide                                 | 2069-86-5    | NC(=O)C(F)C(F)C(F)F                                                                                                                                                                                                                                                                                                                                                                                                                                                                                                                                                                                                                                                                                                                                                                                                                                                                                                                                                                                                                                                                                                                                                                                                                                                                                                                                                                                                                                                                                                                                                                                                                                                                                                                                                                                                                                                                                                                                                                                                                                                                                                                                                                                                                                                                                                                                                                                                                                                                                                                                                                                                                                                                                                                                                                                                                                                                                                                                                                                                                                                                                                                                                                                                                                                                                                                                                                                                                                                                                                                                                                                                                                                                                                                                                                                                                                                                                                                                                                                                                                                                                                                                                                                                                                                                                                                                                                                                                                                                                                                                                                                                                                                                                                                                                                                                                                                                                                                                                                                                                                                                                                                                                                                                                                                                                                                                                                                                                                                                                                                                                                                                                                                                                                                                                                                                                                                                                                                                                                                                                                                                                                                                                                                                                                                                                                                                                                        | -4.48  | 33.33 | 3.83 | P |  | OUT |
| QL03647 | Perfluoro-2(1-propoxyl)perfluoropropanamide                    | 13140-35-7   | NC(=O)C(F)C(F)C(F)C(F)C(F)C(F)C(F)F                                                                                                                                                                                                                                                                                                                                                                                                                                                                                                                                                                                                                                                                                                                                                                                                                                                                                                                                                                                                                                                                                                                                                                                                                                                                                                                                                                                                                                                                                                                                                                                                                                                                                                                                                                                                                                                                                                                                                                                                                                                                                                                                                                                                                                                                                                                                                                                                                                                                                                                                                                                                                                                                                                                                                                                                                                                                                                                                                                                                                                                                                                                                                                                                                                                                                                                                                                                                                                                                                                                                                                                                                                                                                                                                                                                                                                                                                                                                                                                                                                                                                                                                                                                                                                                                                                                                                                                                                                                                                                                                                                                                                                                                                                                                                                                                                                                                                                                                                                                                                                                                                                                                                                                                                                                                                                                                                                                                                                                                                                                                                                                                                                                                                                                                                                                                                                                                                                                                                                                                                                                                                                                                                                                                                                                                                                                                                        | -8.08  | 50.00 | 5.35 | P |  | IN  |
| QL03648 | 2,3,3,3-Tetrafluoro-2-[1,1,2,3,3,3-hexafluoro-2-(heptafluoro   | 60308-67-0   | NC(=O)C(F)C(F)C(F)C(F)C(F)C(F)C(F)C(F)C(F)C(F)C(F)C(F)F                                                                                                                                                                                                                                                                                                                                                                                                                                                                                                                                                                                                                                                                                                                                                                                                                                                                                                                                                                                                                                                                                                                                                                                                                                                                                                                                                                                                                                                                                                                                                                                                                                                                                                                                                                                                                                                                                                                                                                                                                                                                                                                                                                                                                                                                                                                                                                                                                                                                                                                                                                                                                                                                                                                                                                                                                                                                                                                                                                                                                                                                                                                                                                                                                                                                                                                                                                                                                                                                                                                                                                                                                                                                                                                                                                                                                                                                                                                                                                                                                                                                                                                                                                                                                                                                                                                                                                                                                                                                                                                                                                                                                                                                                                                                                                                                                                                                                                                                                                                                                                                                                                                                                                                                                                                                                                                                                                                                                                                                                                                                                                                                                                                                                                                                                                                                                                                                                                                                                                                                                                                                                                                                                                                                                                                                                                                                    | -9.84  | 53.13 | 6.14 | P |  | IN  |
| QL03649 | 2,3,3,3-Tetrafluoro-2-[1,1,2,3,3,3-hexafluoro-2-[1,1,2,3,3-he  | 51445-02-4   | NC(=O)C(F)C(F)C(F)C(F)C(F)C(F)C(F)C(F)C(F)C(F)C(F)C(F)C(F)F                                                                                                                                                                                                                                                                                                                                                                                                                                                                                                                                                                                                                                                                                                                                                                                                                                                                                                                                                                                                                                                                                                                                                                                                                                                                                                                                                                                                                                                                                                                                                                                                                                                                                                                                                                                                                                                                                                                                                                                                                                                                                                                                                                                                                                                                                                                                                                                                                                                                                                                                                                                                                                                                                                                                                                                                                                                                                                                                                                                                                                                                                                                                                                                                                                                                                                                                                                                                                                                                                                                                                                                                                                                                                                                                                                                                                                                                                                                                                                                                                                                                                                                                                                                                                                                                                                                                                                                                                                                                                                                                                                                                                                                                                                                                                                                                                                                                                                                                                                                                                                                                                                                                                                                                                                                                                                                                                                                                                                                                                                                                                                                                                                                                                                                                                                                                                                                                                                                                                                                                                                                                                                                                                                                                                                                                                                                                | -11.08 | 54.76 | 6.71 | P |  | OUT |
| QL03650 | 2,3,3,3-Tetrafluoro-2-(trifluoromethoxy)propanamide            | 67710-48-9   | NC(=O)C(F)C(F)C(F)C(F)F                                                                                                                                                                                                                                                                                                                                                                                                                                                                                                                                                                                                                                                                                                                                                                                                                                                                                                                                                                                                                                                                                                                                                                                                                                                                                                                                                                                                                                                                                                                                                                                                                                                                                                                                                                                                                                                                                                                                                                                                                                                                                                                                                                                                                                                                                                                                                                                                                                                                                                                                                                                                                                                                                                                                                                                                                                                                                                                                                                                                                                                                                                                                                                                                                                                                                                                                                                                                                                                                                                                                                                                                                                                                                                                                                                                                                                                                                                                                                                                                                                                                                                                                                                                                                                                                                                                                                                                                                                                                                                                                                                                                                                                                                                                                                                                                                                                                                                                                                                                                                                                                                                                                                                                                                                                                                                                                                                                                                                                                                                                                                                                                                                                                                                                                                                                                                                                                                                                                                                                                                                                                                                                                                                                                                                                                                                                                                                    | -6.48  | 43.75 | 4.66 | P |  | IN  |
| QL03651 | Flupoxam                                                       | 119126-15-7  | NC(=O)c1nc(-c2ccccc2)n(n1)-c1ccc(c)c(COCC(F)C(F)C(F)F)c1                                                                                                                                                                                                                                                                                                                                                                                                                                                                                                                                                                                                                                                                                                                                                                                                                                                                                                                                                                                                                                                                                                                                                                                                                                                                                                                                                                                                                                                                                                                                                                                                                                                                                                                                                                                                                                                                                                                                                                                                                                                                                                                                                                                                                                                                                                                                                                                                                                                                                                                                                                                                                                                                                                                                                                                                                                                                                                                                                                                                                                                                                                                                                                                                                                                                                                                                                                                                                                                                                                                                                                                                                                                                                                                                                                                                                                                                                                                                                                                                                                                                                                                                                                                                                                                                                                                                                                                                                                                                                                                                                                                                                                                                                                                                                                                                                                                                                                                                                                                                                                                                                                                                                                                                                                                                                                                                                                                                                                                                                                                                                                                                                                                                                                                                                                                                                                                                                                                                                                                                                                                                                                                                                                                                                                                                                                                                   | -11.79 | 13.33 | 7.45 | P |  | OUT |
| QL03652 | 1,1,1,2,3,3,4,4,5,5,6,6,7,7,8,8-Heptadecafluorooctan-2-yl ca   | 92681-65-7   | NC(=O)OC(F)C(F)C(F)C(F)C(F)C(F)C(F)C(F)C(F)C(F)C(F)C(F)F                                                                                                                                                                                                                                                                                                                                                                                                                                                                                                                                                                                                                                                                                                                                                                                                                                                                                                                                                                                                                                                                                                                                                                                                                                                                                                                                                                                                                                                                                                                                                                                                                                                                                                                                                                                                                                                                                                                                                                                                                                                                                                                                                                                                                                                                                                                                                                                                                                                                                                                                                                                                                                                                                                                                                                                                                                                                                                                                                                                                                                                                                                                                                                                                                                                                                                                                                                                                                                                                                                                                                                                                                                                                                                                                                                                                                                                                                                                                                                                                                                                                                                                                                                                                                                                                                                                                                                                                                                                                                                                                                                                                                                                                                                                                                                                                                                                                                                                                                                                                                                                                                                                                                                                                                                                                                                                                                                                                                                                                                                                                                                                                                                                                                                                                                                                                                                                                                                                                                                                                                                                                                                                                                                                                                                                                                                                                   | -9.73  | 54.84 | 6.08 | P |  | IN  |
| QL03653 | 2,2,3,3,4,4,4-Hepatafluorobutanethioamide                      | 375-20-2     | NC(=S)C(F)C(F)C(F)C(F)F                                                                                                                                                                                                                                                                                                                                                                                                                                                                                                                                                                                                                                                                                                                                                                                                                                                                                                                                                                                                                                                                                                                                                                                                                                                                                                                                                                                                                                                                                                                                                                                                                                                                                                                                                                                                                                                                                                                                                                                                                                                                                                                                                                                                                                                                                                                                                                                                                                                                                                                                                                                                                                                                                                                                                                                                                                                                                                                                                                                                                                                                                                                                                                                                                                                                                                                                                                                                                                                                                                                                                                                                                                                                                                                                                                                                                                                                                                                                                                                                                                                                                                                                                                                                                                                                                                                                                                                                                                                                                                                                                                                                                                                                                                                                                                                                                                                                                                                                                                                                                                                                                                                                                                                                                                                                                                                                                                                                                                                                                                                                                                                                                                                                                                                                                                                                                                                                                                                                                                                                                                                                                                                                                                                                                                                                                                                                                                    | -6.24  | 46.67 | 4.52 | P |  | IN  |
| QL03654 | 2-(Perfluoropropyl)glycine                                     | 26208-02-6   | NC(C)(O)=O)C(F)C(F)C(F)C(F)F                                                                                                                                                                                                                                                                                                                                                                                                                                                                                                                                                                                                                                                                                                                                                                                                                                                                                                                                                                                                                                                                                                                                                                                                                                                                                                                                                                                                                                                                                                                                                                                                                                                                                                                                                                                                                                                                                                                                                                                                                                                                                                                                                                                                                                                                                                                                                                                                                                                                                                                                                                                                                                                                                                                                                                                                                                                                                                                                                                                                                                                                                                                                                                                                                                                                                                                                                                                                                                                                                                                                                                                                                                                                                                                                                                                                                                                                                                                                                                                                                                                                                                                                                                                                                                                                                                                                                                                                                                                                                                                                                                                                                                                                                                                                                                                                                                                                                                                                                                                                                                                                                                                                                                                                                                                                                                                                                                                                                                                                                                                                                                                                                                                                                                                                                                                                                                                                                                                                                                                                                                                                                                                                                                                                                                                                                                                                                               | -6.62  | 36.84 | 4.80 | P |  | IN  |
| QL03655 | 4,4,5,5,6,6,6-Hepatafluoronoreucine                            | 15960-01-7   | NC(CC(F)C(F)C(F)C(F)F)C(O)=O                                                                                                                                                                                                                                                                                                                                                                                                                                                                                                                                                                                                                                                                                                                                                                                                                                                                                                                                                                                                                                                                                                                                                                                                                                                                                                                                                                                                                                                                                                                                                                                                                                                                                                                                                                                                                                                                                                                                                                                                                                                                                                                                                                                                                                                                                                                                                                                                                                                                                                                                                                                                                                                                                                                                                                                                                                                                                                                                                                                                                                                                                                                                                                                                                                                                                                                                                                                                                                                                                                                                                                                                                                                                                                                                                                                                                                                                                                                                                                                                                                                                                                                                                                                                                                                                                                                                                                                                                                                                                                                                                                                                                                                                                                                                                                                                                                                                                                                                                                                                                                                                                                                                                                                                                                                                                                                                                                                                                                                                                                                                                                                                                                                                                                                                                                                                                                                                                                                                                                                                                                                                                                                                                                                                                                                                                                                                                               | -6.78  | 31.82 | 4.92 | P |  | IN  |
| QL03656 | 3-Amino-4,4,5,5,6,6,6-heptafluorohexanoic acid                 | 150618-42-1  | NC(CC(O)=O)C(F)C(F)C(F)C(F)F                                                                                                                                                                                                                                                                                                                                                                                                                                                                                                                                                                                                                                                                                                                                                                                                                                                                                                                                                                                                                                                                                                                                                                                                                                                                                                                                                                                                                                                                                                                                                                                                                                                                                                                                                                                                                                                                                                                                                                                                                                                                                                                                                                                                                                                                                                                                                                                                                                                                                                                                                                                                                                                                                                                                                                                                                                                                                                                                                                                                                                                                                                                                                                                                                                                                                                                                                                                                                                                                                                                                                                                                                                                                                                                                                                                                                                                                                                                                                                                                                                                                                                                                                                                                                                                                                                                                                                                                                                                                                                                                                                                                                                                                                                                                                                                                                                                                                                                                                                                                                                                                                                                                                                                                                                                                                                                                                                                                                                                                                                                                                                                                                                                                                                                                                                                                                                                                                                                                                                                                                                                                                                                                                                                                                                                                                                                                                               | -6.78  | 31.82 | 4.92 | P |  | IN  |
| QL03657 | 2-Amino-3-(perfluoropropyl)-1-phenyl-3-propanol                | 322392-46-1  | N(C(C=C-C-C=C=C1)C(O)C(F)C(F)C(F)C(F)F                                                                                                                                                                                                                                                                                                                                                                                                                                                                                                                                                                                                                                                                                                                                                                                                                                                                                                                                                                                                                                                                                                                                                                                                                                                                                                                                                                                                                                                                                                                                                                                                                                                                                                                                                                                                                                                                                                                                                                                                                                                                                                                                                                                                                                                                                                                                                                                                                                                                                                                                                                                                                                                                                                                                                                                                                                                                                                                                                                                                                                                                                                                                                                                                                                                                                                                                                                                                                                                                                                                                                                                                                                                                                                                                                                                                                                                                                                                                                                                                                                                                                                                                                                                                                                                                                                                                                                                                                                                                                                                                                                                                                                                                                                                                                                                                                                                                                                                                                                                                                                                                                                                                                                                                                                                                                                                                                                                                                                                                                                                                                                                                                                                                                                                                                                                                                                                                                                                                                                                                                                                                                                                                                                                                                                                                                                                                                     | -8.38  | 21.21 | 5.77 | P |  | OUT |
| QL03658 | 2-Amino-5,5,6,6,7,7,8,8,8-nonafluorooctanoic acid              | 125162-63-2  | NC(CCC(F)C(F)C(F)C(F)C(F)C(F)C(F)C(F)C(F)O)=O                                                                                                                                                                                                                                                                                                                                                                                                                                                                                                                                                                                                                                                                                                                                                                                                                                                                                                                                                                                                                                                                                                                                                                                                                                                                                                                                                                                                                                                                                                                                                                                                                                                                                                                                                                                                                                                                                                                                                                                                                                                                                                                                                                                                                                                                                                                                                                                                                                                                                                                                                                                                                                                                                                                                                                                                                                                                                                                                                                                                                                                                                                                                                                                                                                                                                                                                                                                                                                                                                                                                                                                                                                                                                                                                                                                                                                                                                                                                                                                                                                                                                                                                                                                                                                                                                                                                                                                                                                                                                                                                                                                                                                                                                                                                                                                                                                                                                                                                                                                                                                                                                                                                                                                                                                                                                                                                                                                                                                                                                                                                                                                                                                                                                                                                                                                                                                                                                                                                                                                                                                                                                                                                                                                                                                                                                                                                              | -7.71  | 32.14 | 5.35 | P |  | IN  |
| QL03659 | 2-Amino-5,5,6,6,7,7,7,8-heptafluoroheptanoic acid              | 10325-10-7   | NC(CCC(F)C(F)C(F)C(F)C(F)C(F)C(F)O)=O                                                                                                                                                                                                                                                                                                                                                                                                                                                                                                                                                                                                                                                                                                                                                                                                                                                                                                                                                                                                                                                                                                                                                                                                                                                                                                                                                                                                                                                                                                                                                                                                                                                                                                                                                                                                                                                                                                                                                                                                                                                                                                                                                                                                                                                                                                                                                                                                                                                                                                                                                                                                                                                                                                                                                                                                                                                                                                                                                                                                                                                                                                                                                                                                                                                                                                                                                                                                                                                                                                                                                                                                                                                                                                                                                                                                                                                                                                                                                                                                                                                                                                                                                                                                                                                                                                                                                                                                                                                                                                                                                                                                                                                                                                                                                                                                                                                                                                                                                                                                                                                                                                                                                                                                                                                                                                                                                                                                                                                                                                                                                                                                                                                                                                                                                                                                                                                                                                                                                                                                                                                                                                                                                                                                                                                                                                                                                      | -6.95  | 28.00 | 5.04 | P |  | OUT |
| QL03660 | 2-Amino-6,6,7,7,8,8,8-heptafluorooctanoic acid                 | 10325-14-1   | NC(CCCC(F)C(F)C(F)C(F)C(F)C(F)C(F)O)=O                                                                                                                                                                                                                                                                                                                                                                                                                                                                                                                                                                                                                                                                                                                                                                                                                                                                                                                                                                                                                                                                                                                                                                                                                                                                                                                                                                                                                                                                                                                                                                                                                                                                                                                                                                                                                                                                                                                                                                                                                                                                                                                                                                                                                                                                                                                                                                                                                                                                                                                                                                                                                                                                                                                                                                                                                                                                                                                                                                                                                                                                                                                                                                                                                                                                                                                                                                                                                                                                                                                                                                                                                                                                                                                                                                                                                                                                                                                                                                                                                                                                                                                                                                                                                                                                                                                                                                                                                                                                                                                                                                                                                                                                                                                                                                                                                                                                                                                                                                                                                                                                                                                                                                                                                                                                                                                                                                                                                                                                                                                                                                                                                                                                                                                                                                                                                                                                                                                                                                                                                                                                                                                                                                                                                                                                                                                                                     | -7.12  | 25.00 | 5.15 | P |  | OUT |
| QL03661 | Undecafluoropentan-1-amine                                     | 134380-80-6  | NC(F)C(F)C(F)C(F)C(F)C(F)C(F)F                                                                                                                                                                                                                                                                                                                                                                                                                                                                                                                                                                                                                                                                                                                                                                                                                                                                                                                                                                                                                                                                                                                                                                                                                                                                                                                                                                                                                                                                                                                                                                                                                                                                                                                                                                                                                                                                                                                                                                                                                                                                                                                                                                                                                                                                                                                                                                                                                                                                                                                                                                                                                                                                                                                                                                                                                                                                                                                                                                                                                                                                                                                                                                                                                                                                                                                                                                                                                                                                                                                                                                                                                                                                                                                                                                                                                                                                                                                                                                                                                                                                                                                                                                                                                                                                                                                                                                                                                                                                                                                                                                                                                                                                                                                                                                                                                                                                                                                                                                                                                                                                                                                                                                                                                                                                                                                                                                                                                                                                                                                                                                                                                                                                                                                                                                                                                                                                                                                                                                                                                                                                                                                                                                                                                                                                                                                                                             | -7.57  | 57.89 | 5.04 | P |  | IN  |
| QL03662 | 6-Bromo-8-{1,1,2,3,3,3-heptafluoropropan-2-yl}quinolin-5-a     | 917923-88-7  | NC1C(Br)C=C(C2=C1C=C-C=N2)C(F)C(F)C(F)C(F)C(F)F                                                                                                                                                                                                                                                                                                                                                                                                                                                                                                                                                                                                                                                                                                                                                                                                                                                                                                                                                                                                                                                                                                                                                                                                                                                                                                                                                                                                                                                                                                                                                                                                                                                                                                                                                                                                                                                                                                                                                                                                                                                                                                                                                                                                                                                                                                                                                                                                                                                                                                                                                                                                                                                                                                                                                                                                                                                                                                                                                                                                                                                                                                                                                                                                                                                                                                                                                                                                                                                                                                                                                                                                                                                                                                                                                                                                                                                                                                                                                                                                                                                                                                                                                                                                                                                                                                                                                                                                                                                                                                                                                                                                                                                                                                                                                                                                                                                                                                                                                                                                                                                                                                                                                                                                                                                                                                                                                                                                                                                                                                                                                                                                                                                                                                                                                                                                                                                                                                                                                                                                                                                                                                                                                                                                                                                                                                                                            | -10.09 | 28.57 | 6.50 | P |  | OUT |
| QL03663 | 3-(Tridecafluorohexyl)pyridin-4-amine                          | 143094-26-2  | NC1=C(C=N=C=C1)C(F)C(F)C(F)C(F)C(F)C(F)C(F)C(F)F                                                                                                                                                                                                                                                                                                                                                                                                                                                                                                                                                                                                                                                                                                                                                                                                                                                                                                                                                                                                                                                                                                                                                                                                                                                                                                                                                                                                                                                                                                                                                                                                                                                                                                                                                                                                                                                                                                                                                                                                                                                                                                                                                                                                                                                                                                                                                                                                                                                                                                                                                                                                                                                                                                                                                                                                                                                                                                                                                                                                                                                                                                                                                                                                                                                                                                                                                                                                                                                                                                                                                                                                                                                                                                                                                                                                                                                                                                                                                                                                                                                                                                                                                                                                                                                                                                                                                                                                                                                                                                                                                                                                                                                                                                                                                                                                                                                                                                                                                                                                                                                                                                                                                                                                                                                                                                                                                                                                                                                                                                                                                                                                                                                                                                                                                                                                                                                                                                                                                                                                                                                                                                                                                                                                                                                                                                                                           | -9.69  | 41.94 | 6.19 | P |  | IN  |
| QL03664 | 2-Fluoro-4-(nonafluorobutyl)aniline                            | 821791-47-3  | NC1=C(F)C=C(C=C1)C(F)C(F)C(F)C(F)C(F)C(F)F                                                                                                                                                                                                                                                                                                                                                                                                                                                                                                                                                                                                                                                                                                                                                                                                                                                                                                                                                                                                                                                                                                                                                                                                                                                                                                                                                                                                                                                                                                                                                                                                                                                                                                                                                                                                                                                                                                                                                                                                                                                                                                                                                                                                                                                                                                                                                                                                                                                                                                                                                                                                                                                                                                                                                                                                                                                                                                                                                                                                                                                                                                                                                                                                                                                                                                                                                                                                                                                                                                                                                                                                                                                                                                                                                                                                                                                                                                                                                                                                                                                                                                                                                                                                                                                                                                                                                                                                                                                                                                                                                                                                                                                                                                                                                                                                                                                                                                                                                                                                                                                                                                                                                                                                                                                                                                                                                                                                                                                                                                                                                                                                                                                                                                                                                                                                                                                                                                                                                                                                                                                                                                                                                                                                                                                                                                                                                 | -8.91  | 38.46 | 5.86 | P |  | IN  |
| QL03665 | Phenol, 2-amino-4-(heptafluoropropyl)-                         | 61324-30-9   | NC1=C(C)C=C(C=C1)C(F)C(F)C(F)C(F)C(F)F                                                                                                                                                                                                                                                                                                                                                                                                                                                                                                                                                                                                                                                                                                                                                                                                                                                                                                                                                                                                                                                                                                                                                                                                                                                                                                                                                                                                                                                                                                                                                                                                                                                                                                                                                                                                                                                                                                                                                                                                                                                                                                                                                                                                                                                                                                                                                                                                                                                                                                                                                                                                                                                                                                                                                                                                                                                                                                                                                                                                                                                                                                                                                                                                                                                                                                                                                                                                                                                                                                                                                                                                                                                                                                                                                                                                                                                                                                                                                                                                                                                                                                                                                                                                                                                                                                                                                                                                                                                                                                                                                                                                                                                                                                                                                                                                                                                                                                                                                                                                                                                                                                                                                                                                                                                                                                                                                                                                                                                                                                                                                                                                                                                                                                                                                                                                                                                                                                                                                                                                                                                                                                                                                                                                                                                                                                                                                     | -8.16  | 29.17 | 5.59 | P |  | OUT |
| QL03666 | 5-(1,1,2,2,3,3,3-heptafluoropropyl)benzene-1,3-diamine         | 5141-88-8    | NC1=CC=C(C(N)=C1)C(F)C(F)C(F)C(F)C(F)F                                                                                                                                                                                                                                                                                                                                                                                                                                                                                                                                                                                                                                                                                                                                                                                                                                                                                                                                                                                                                                                                                                                                                                                                                                                                                                                                                                                                                                                                                                                                                                                                                                                                                                                                                                                                                                                                                                                                                                                                                                                                                                                                                                                                                                                                                                                                                                                                                                                                                                                                                                                                                                                                                                                                                                                                                                                                                                                                                                                                                                                                                                                                                                                                                                                                                                                                                                                                                                                                                                                                                                                                                                                                                                                                                                                                                                                                                                                                                                                                                                                                                                                                                                                                                                                                                                                                                                                                                                                                                                                                                                                                                                                                                                                                                                                                                                                                                                                                                                                                                                                                                                                                                                                                                                                                                                                                                                                                                                                                                                                                                                                                                                                                                                                                                                                                                                                                                                                                                                                                                                                                                                                                                                                                                                                                                                                                                     | -8.13  | 28.00 | 5.59 | P |  | OUT |
| QL03667 | 2,5-Dichloro-4-(1,1,2,3,3,3-hexafluoropropoxy)aniline          | 103015-84-5  | NC1=CC(Cl)=C(Cl)OC(F)C(F)C(F)C(F)C(F)C=C1Cl                                                                                                                                                                                                                                                                                                                                                                                                                                                                                                                                                                                                                                                                                                                                                                                                                                                                                                                                                                                                                                                                                                                                                                                                                                                                                                                                                                                                                                                                                                                                                                                                                                                                                                                                                                                                                                                                                                                                                                                                                                                                                                                                                                                                                                                                                                                                                                                                                                                                                                                                                                                                                                                                                                                                                                                                                                                                                                                                                                                                                                                                                                                                                                                                                                                                                                                                                                                                                                                                                                                                                                                                                                                                                                                                                                                                                                                                                                                                                                                                                                                                                                                                                                                                                                                                                                                                                                                                                                                                                                                                                                                                                                                                                                                                                                                                                                                                                                                                                                                                                                                                                                                                                                                                                                                                                                                                                                                                                                                                                                                                                                                                                                                                                                                                                                                                                                                                                                                                                                                                                                                                                                                                                                                                                                                                                                                                                | -8.51  | 33.33 | 5.72 | P |  | IN  |
| QL03668 | 4-(1,1,1,2,3,3,3-Hepatafluoropropan-2-yl)benzene-1,3-diamine   | 58524-63-3   | NC1=CC(N)=C(C=C1)C(F)C(F)C(F)C(F)F                                                                                                                                                                                                                                                                                                                                                                                                                                                                                                                                                                                                                                                                                                                                                                                                                                                                                                                                                                                                                                                                                                                                                                                                                                                                                                                                                                                                                                                                                                                                                                                                                                                                                                                                                                                                                                                                                                                                                                                                                                                                                                                                                                                                                                                                                                                                                                                                                                                                                                                                                                                                                                                                                                                                                                                                                                                                                                                                                                                                                                                                                                                                                                                                                                                                                                                                                                                                                                                                                                                                                                                                                                                                                                                                                                                                                                                                                                                                                                                                                                                                                                                                                                                                                                                                                                                                                                                                                                                                                                                                                                                                                                                                                                                                                                                                                                                                                                                                                                                                                                                                                                                                                                                                                                                                                                                                                                                                                                                                                                                                                                                                                                                                                                                                                                                                                                                                                                                                                                                                                                                                                                                                                                                                                                                                                                                                                         | -8.13  | 28.00 | 5.59 | P |  | OUT |
| QL03669 | 4-[Hepatecafluoroocetyl]oxy]benzene-1,3-diamine                | 96573-73-8   | NC1=CC(N)=C(C)OC(F)C(F)C(F)C(F)C(F)C(F)C(F)C(F)C(F)C(F)C=C1                                                                                                                                                                                                                                                                                                                                                                                                                                                                                                                                                                                                                                                                                                                                                                                                                                                                                                                                                                                                                                                                                                                                                                                                                                                                                                                                                                                                                                                                                                                                                                                                                                                                                                                                                                                                                                                                                                                                                                                                                                                                                                                                                                                                                                                                                                                                                                                                                                                                                                                                                                                                                                                                                                                                                                                                                                                                                                                                                                                                                                                                                                                                                                                                                                                                                                                                                                                                                                                                                                                                                                                                                                                                                                                                                                                                                                                                                                                                                                                                                                                                                                                                                                                                                                                                                                                                                                                                                                                                                                                                                                                                                                                                                                                                                                                                                                                                                                                                                                                                                                                                                                                                                                                                                                                                                                                                                                                                                                                                                                                                                                                                                                                                                                                                                                                                                                                                                                                                                                                                                                                                                                                                                                                                                                                                                                                                | -10.76 | 41.46 | 6.69 | P |  | OUT |
| QL03670 | 4-perfluoroisopropylaniline                                    | 2396-17-0    | NC1=CC=C(C=C1)C(F)C(F)C(F)C(F)F                                                                                                                                                                                                                                                                                                                                                                                                                                                                                                                                                                                                                                                                                                                                                                                                                                                                                                                                                                                                                                                                                                                                                                                                                                                                                                                                                                                                                                                                                                                                                                                                                                                                                                                                                                                                                                                                                                                                                                                                                                                                                                                                                                                                                                                                                                                                                                                                                                                                                                                                                                                                                                                                                                                                                                                                                                                                                                                                                                                                                                                                                                                                                                                                                                                                                                                                                                                                                                                                                                                                                                                                                                                                                                                                                                                                                                                                                                                                                                                                                                                                                                                                                                                                                                                                                                                                                                                                                                                                                                                                                                                                                                                                                                                                                                                                                                                                                                                                                                                                                                                                                                                                                                                                                                                                                                                                                                                                                                                                                                                                                                                                                                                                                                                                                                                                                                                                                                                                                                                                                                                                                                                                                                                                                                                                                                                                                            | -7.89  | 30.43 | 5.46 | P |  | OUT |
| QL03671 | 4-(Perfluoroocetyl)aniline                                     | 83766-52-3   | NC1=CC=C(C=C1)C(F)C(F)C(F)C(F)C(F)C(F)C(F)C(F)C(F)F                                                                                                                                                                                                                                                                                                                                                                                                                                                                                                                                                                                                                                                                                                                                                                                                                                                                                                                                                                                                                                                                                                                                                                                                                                                                                                                                                                                                                                                                                                                                                                                                                                                                                                                                                                                                                                                                                                                                                                                                                                                                                                                                                                                                                                                                                                                                                                                                                                                                                                                                                                                                                                                                                                                                                                                                                                                                                                                                                                                                                                                                                                                                                                                                                                                                                                                                                                                                                                                                                                                                                                                                                                                                                                                                                                                                                                                                                                                                                                                                                                                                                                                                                                                                                                                                                                                                                                                                                                                                                                                                                                                                                                                                                                                                                                                                                                                                                                                                                                                                                                                                                                                                                                                                                                                                                                                                                                                                                                                                                                                                                                                                                                                                                                                                                                                                                                                                                                                                                                                                                                                                                                                                                                                                                                                                                                                                        | -10.53 | 44.74 | 6.55 | P |  | OUT |
| QL03672 | 4-(Tridecafluorohexyl)aniline                                  | 139613-90-4  | NC1=CC=C(C=C1)C(F)C(F)C(F)C(F)C(F)C(F)C(F)C(F)C(F)F                                                                                                                                                                                                                                                                                                                                                                                                                                                                                                                                                                                                                                                                                                                                                                                                                                                                                                                                                                                                                                                                                                                                                                                                                                                                                                                                                                                                                                                                                                                                                                                                                                                                                                                                                                                                                                                                                                                                                                                                                                                                                                                                                                                                                                                                                                                                                                                                                                                                                                                                                                                                                                                                                                                                                                                                                                                                                                                                                                                                                                                                                                                                                                                                                                                                                                                                                                                                                                                                                                                                                                                                                                                                                                                                                                                                                                                                                                                                                                                                                                                                                                                                                                                                                                                                                                                                                                                                                                                                                                                                                                                                                                                                                                                                                                                                                                                                                                                                                                                                                                                                                                                                                                                                                                                                                                                                                                                                                                                                                                                                                                                                                                                                                                                                                                                                                                                                                                                                                                                                                                                                                                                                                                                                                                                                                                                                        | -9.67  | 40.63 | 6.19 | P |  | IN  |
| QL03673 | Benzenamine, 4-(nonafluorobutyl)-                              | 114262-65-6  | NC1=CC=C(C=C1)C(F)C(F)C(F)C(F)C(F)C(F)F                                                                                                                                                                                                                                                                                                                                                                                                                                                                                                                                                                                                                                                                                                                                                                                                                                                                                                                                                                                                                                                                                                                                                                                                                                                                                                                                                                                                                                                                                                                                                                                                                                                                                                                                                                                                                                                                                                                                                                                                                                                                                                                                                                                                                                                                                                                                                                                                                                                                                                                                                                                                                                                                                                                                                                                                                                                                                                                                                                                                                                                                                                                                                                                                                                                                                                                                                                                                                                                                                                                                                                                                                                                                                                                                                                                                                                                                                                                                                                                                                                                                                                                                                                                                                                                                                                                                                                                                                                                                                                                                                                                                                                                                                                                                                                                                                                                                                                                                                                                                                                                                                                                                                                                                                                                                                                                                                                                                                                                                                                                                                                                                                                                                                                                                                                                                                                                                                                                                                                                                                                                                                                                                                                                                                                                                                                                                                    | -8.57  | 34.62 | 5.73 | P |  | IN  |
| QL03674 | 4-(3,3,4,4,5,5,6,6,6-Nonafluorohexyl)aniline                   | 919289-98-8  | NC1=CC=C(CCC(F)C(F)C(F)C(F)C(F)C(F)C(F)C=C1                                                                                                                                                                                                                                                                                                                                                                                                                                                                                                                                                                                                                                                                                                                                                                                                                                                                                                                                                                                                                                                                                                                                                                                                                                                                                                                                                                                                                                                                                                                                                                                                                                                                                                                                                                                                                                                                                                                                                                                                                                                                                                                                                                                                                                                                                                                                                                                                                                                                                                                                                                                                                                                                                                                                                                                                                                                                                                                                                                                                                                                                                                                                                                                                                                                                                                                                                                                                                                                                                                                                                                                                                                                                                                                                                                                                                                                                                                                                                                                                                                                                                                                                                                                                                                                                                                                                                                                                                                                                                                                                                                                                                                                                                                                                                                                                                                                                                                                                                                                                                                                                                                                                                                                                                                                                                                                                                                                                                                                                                                                                                                                                                                                                                                                                                                                                                                                                                                                                                                                                                                                                                                                                                                                                                                                                                                                                                | -8.79  | 28.13 | 5.90 | P |  | OUT |
| QL03675 | 4-(Nonafluorobutoxy)aniline                                    | 62315-18-8   | NC1=CC=C(OC(F)C(F)C(F)C(F)C(F)C(F)C(F)C=C1                                                                                                                                                                                                                                                                                                                                                                                                                                                                                                                                                                                                                                                                                                                                                                                                                                                                                                                                                                                                                                                                                                                                                                                                                                                                                                                                                                                                                                                                                                                                                                                                                                                                                                                                                                                                                                                                                                                                                                                                                                                                                                                                                                                                                                                                                                                                                                                                                                                                                                                                                                                                                                                                                                                                                                                                                                                                                                                                                                                                                                                                                                                                                                                                                                                                                                                                                                                                                                                                                                                                                                                                                                                                                                                                                                                                                                                                                                                                                                                                                                                                                                                                                                                                                                                                                                                                                                                                                                                                                                                                                                                                                                                                                                                                                                                                                                                                                                                                                                                                                                                                                                                                                                                                                                                                                                                                                                                                                                                                                                                                                                                                                                                                                                                                                                                                                                                                                                                                                                                                                                                                                                                                                                                                                                                                                                                                                 | -8.73  | 33.33 | 5.82 | P |  | OUT |
| QL03676 | 3-(Heptadecafluoroocetyl)aniline                               | 119489-67-7  | NC1=CC=C(C=C1)C(F)C(F)C(F)C(F)C(F)C(F)C(F)C(F)C(F)C(F)C(F)F                                                                                                                                                                                                                                                                                                                                                                                                                                                                                                                                                                                                                                                                                                                                                                                                                                                                                                                                                                                                                                                                                                                                                                                                                                                                                                                                                                                                                                                                                                                                                                                                                                                                                                                                                                                                                                                                                                                                                                                                                                                                                                                                                                                                                                                                                                                                                                                                                                                                                                                                                                                                                                                                                                                                                                                                                                                                                                                                                                                                                                                                                                                                                                                                                                                                                                                                                                                                                                                                                                                                                                                                                                                                                                                                                                                                                                                                                                                                                                                                                                                                                                                                                                                                                                                                                                                                                                                                                                                                                                                                                                                                                                                                                                                                                                                                                                                                                                                                                                                                                                                                                                                                                                                                                                                                                                                                                                                                                                                                                                                                                                                                                                                                                                                                                                                                                                                                                                                                                                                                                                                                                                                                                                                                                                                                                                                                | -10.53 | 44.74 | 6.55 | P |  | OUT |
| QL03677 | ST50977988                                                     | 299937-37-4  | NC1=NN=C(S1)C(F)C(F)C(F)C(F)C(F)F                                                                                                                                                                                                                                                                                                                                                                                                                                                                                                                                                                                                                                                                                                                                                                                                                                                                                                                                                                                                                                                                                                                                                                                                                                                                                                                                                                                                                                                                                                                                                                                                                                                                                                                                                                                                                                                                                                                                                                                                                                                                                                                                                                                                                                                                                                                                                                                                                                                                                                                                                                                                                                                                                                                                                                                                                                                                                                                                                                                                                                                                                                                                                                                                                                                                                                                                                                                                                                                                                                                                                                                                                                                                                                                                                                                                                                                                                                                                                                                                                                                                                                                                                                                                                                                                                                                                                                                                                                                                                                                                                                                                                                                                                                                                                                                                                                                                                                                                                                                                                                                                                                                                                                                                                                                                                                                                                                                                                                                                                                                                                                                                                                                                                                                                                                                                                                                                                                                                                                                                                                                                                                                                                                                                                                                                                                                                                          | -7.74  | 38.89 | 5.30 | P |  | IN  |
| QL03678 | 2-Bromo-6-(difluoromethoxy)-4-(1,1,1,2,3,3,3-heptafluoro       | 1262665-49-5 | NC1c(Br)ccc(cc1OC(F)F)C(F)C(F)C(F)C(F)F                                                                                                                                                                                                                                                                                                                                                                                                                                                                                                                                                                                                                                                                                                                                                                                                                                                                                                                                                                                                                                                                                                                                                                                                                                                                                                                                                                                                                                                                                                                                                                                                                                                                                                                                                                                                                                                                                                                                                                                                                                                                                                                                                                                                                                                                                                                                                                                                                                                                                                                                                                                                                                                                                                                                                                                                                                                                                                                                                                                                                                                                                                                                                                                                                                                                                                                                                                                                                                                                                                                                                                                                                                                                                                                                                                                                                                                                                                                                                                                                                                                                                                                                                                                                                                                                                                                                                                                                                                                                                                                                                                                                                                                                                                                                                                                                                                                                                                                                                                                                                                                                                                                                                                                                                                                                                                                                                                                                                                                                                                                                                                                                                                                                                                                                                                                                                                                                                                                                                                                                                                                                                                                                                                                                                                                                                                                                                    | -9.27  | 37.04 | 6.04 | P |  | IN  |
| QL03679 | 2-Chloro-6-(difluoromethoxy)-4-(1,1,1,2,3,3,3-heptafluoro      | 1262665-50-8 | NC1c(Cl)ccc(cc1OC(F)F)C(F)C(F)C(F)C(F)F                                                                                                                                                                                                                                                                                                                                                                                                                                                                                                                                                                                                                                                                                                                                                                                                                                                                                                                                                                                                                                                                                                                                                                                                                                                                                                                                                                                                                                                                                                                                                                                                                                                                                                                                                                                                                                                                                                                                                                                                                                                                                                                                                                                                                                                                                                                                                                                                                                                                                                                                                                                                                                                                                                                                                                                                                                                                                                                                                                                                                                                                                                                                                                                                                                                                                                                                                                                                                                                                                                                                                                                                                                                                                                                                                                                                                                                                                                                                                                                                                                                                                                                                                                                                                                                                                                                                                                                                                                                                                                                                                                                                                                                                                                                                                                                                                                                                                                                                                                                                                                                                                                                                                                                                                                                                                                                                                                                                                                                                                                                                                                                                                                                                                                                                                                                                                                                                                                                                                                                                                                                                                                                                                                                                                                                                                                                                                    | -9.27  | 37.04 | 6.04 | P |  | IN  |
| QL03680 | 4-(1,1,1,2,3,3,3-Hepatafluoropropan-2-yl)-2-iodo-6-(trifluorom | 1207315-39-6 | NC1c(I)ccc(cc1C(F)C(F)C(F)C(F)C(F)C(F)F                                                                                                                                                                                                                                                                                                                                                                                                                                                                                                                                                                                                                                                                                                                                                                                                                                                                                                                                                                                                                                                                                                                                                                                                                                                                                                                                                                                                                                                                                                                                                                                                                                                                                                                                                                                                                                                                                                                                                                                                                                                                                                                                                                                                                                                                                                                                                                                                                                                                                                                                                                                                                                                                                                                                                                                                                                                                                                                                                                                                                                                                                                                                                                                                                                                                                                                                                                                                                                                                                                                                                                                                                                                                                                                                                                                                                                                                                                                                                                                                                                                                                                                                                                                                                                                                                                                                                                                                                                                                                                                                                                                                                                                                                                                                                                                                                                                                                                                                                                                                                                                                                                                                                                                                                                                                                                                                                                                                                                                                                                                                                                                                                                                                                                                                                                                                                                                                                                                                                                                                                                                                                                                                                                                                                                                                                                                                                    | -9.38  | 42.31 | 6.04 | P |  | IN  |
| QL03681 | N-[2-Amino-3-nitro-5-(trifluoromethyl)phenyl]-2,2,3,3,4,4,4-h  | 57450-70-1   | NC1c(NC(=O)C(F)C(F)C(F)C(F)C(F)C(F)C(F)C(F)C(F)C(F)F                                                                                                                                                                                                                                                                                                                                                                                                                                                                                                                                                                                                                                                                                                                                                                                                                                                                                                                                                                                                                                                                                                                                                                                                                                                                                                                                                                                                                                                                                                                                                                                                                                                                                                                                                                                                                                                                                                                                                                                                                                                                                                                                                                                                                                                                                                                                                                                                                                                                                                                                                                                                                                                                                                                                                                                                                                                                                                                                                                                                                                                                                                                                                                                                                                                                                                                                                                                                                                                                                                                                                                                                                                                                                                                                                                                                                                                                                                                                                                                                                                                                                                                                                                                                                                                                                                                                                                                                                                                                                                                                                                                                                                                                                                                                                                                                                                                                                                                                                                                                                                                                                                                                                                                                                                                                                                                                                                                                                                                                                                                                                                                                                                                                                                                                                                                                                                                                                                                                                                                                                                                                                                                                                                                                                                                                                                                                       | -10.00 | 31.25 | 6.43 | P |  | OUT |
| QL03682 | 5-[1,1,1,4,5,5,5-Hepatafluoro-3-(1,1,1,2,3,3,3-heptafluoropr   | 138781-42-7  | NC1ccc(Nccc(OC=C(C(F)C(F)C(F)C(F)C(F)C(F)C(F)C(F)C(F)C(F)F)c1                                                                                                                                                                                                                                                                                                                                                                                                                                                                                                                                                                                                                                                                                                                                                                                                                                                                                                                                                                                                                                                                                                                                                                                                                                                                                                                                                                                                                                                                                                                                                                                                                                                                                                                                                                                                                                                                                                                                                                                                                                                                                                                                                                                                                                                                                                                                                                                                                                                                                                                                                                                                                                                                                                                                                                                                                                                                                                                                                                                                                                                                                                                                                                                                                                                                                                                                                                                                                                                                                                                                                                                                                                                                                                                                                                                                                                                                                                                                                                                                                                                                                                                                                                                                                                                                                                                                                                                                                                                                                                                                                                                                                                                                                                                                                                                                                                                                                                                                                                                                                                                                                                                                                                                                                                                                                                                                                                                                                                                                                                                                                                                                                                                                                                                                                                                                                                                                                                                                                                                                                                                                                                                                                                                                                                                                                                                              | -10.85 | 40.48 | 6.74 | P |  | OUT |
| QL03683 | 4-Amino-2-(1,1,1,2,3,3,3-heptafluoropropan-2-yl)benzonitrile   | 1463530-23-5 | NC1ccc(C#N)c(c1C(F)C(F)C(F)C(F)C(F)F                                                                                                                                                                                                                                                                                                                                                                                                                                                                                                                                                                                                                                                                                                                                                                                                                                                                                                                                                                                                                                                                                                                                                                                                                                                                                                                                                                                                                                                                                                                                                                                                                                                                                                                                                                                                                                                                                                                                                                                                                                                                                                                                                                                                                                                                                                                                                                                                                                                                                                                                                                                                                                                                                                                                                                                                                                                                                                                                                                                                                                                                                                                                                                                                                                                                                                                                                                                                                                                                                                                                                                                                                                                                                                                                                                                                                                                                                                                                                                                                                                                                                                                                                                                                                                                                                                                                                                                                                                                                                                                                                                                                                                                                                                                                                                                                                                                                                                                                                                                                                                                                                                                                                                                                                                                                                                                                                                                                                                                                                                                                                                                                                                                                                                                                                                                                                                                                                                                                                                                                                                                                                                                                                                                                                                                                                                                                                       | -8.42  | 29.17 | 5.71 | P |  | OUT |
| QL03684 | 4-Amino-2-(undecafluoropentyl)benzonitrile                     | 1463530-19-9 | NC1ccc(C#N)c(c1C(F)C(F)C(F)C(F)C(F)C(F)C(F)F                                                                                                                                                                                                                                                                                                                                                                                                                                                                                                                                                                                                                                                                                                                                                                                                                                                                                                                                                                                                                                                                                                                                                                                                                                                                                                                                                                                                                                                                                                                                                                                                                                                                                                                                                                                                                                                                                                                                                                                                                                                                                                                                                                                                                                                                                                                                                                                                                                                                                                                                                                                                                                                                                                                                                                                                                                                                                                                                                                                                                                                                                                                                                                                                                                                                                                                                                                                                                                                                                                                                                                                                                                                                                                                                                                                                                                                                                                                                                                                                                                                                                                                                                                                                                                                                                                                                                                                                                                                                                                                                                                                                                                                                                                                                                                                                                                                                                                                                                                                                                                                                                                                                                                                                                                                                                                                                                                                                                                                                                                                                                                                                                                                                                                                                                                                                                                                                                                                                                                                                                                                                                                                                                                                                                                                                                                                                               | -9.58  | 36.67 | 6.19 | P |  | IN  |
| QL03685 | 4-[5-(Hepatafluoropropyl)-1H-1,2,4-triazol-3-yl]aniline        | 1692915-43-7 | NC1ccc(cc1-c1nnNc(n1)C(F)C(F)C(F)C(F)F                                                                                                                                                                                                                                                                                                                                                                                                                                                                                                                                                                                                                                                                                                                                                                                                                                                                                                                                                                                                                                                                                                                                                                                                                                                                                                                                                                                                                                                                                                                                                                                                                                                                                                                                                                                                                                                                                                                                                                                                                                                                                                                                                                                                                                                                                                                                                                                                                                                                                                                                                                                                                                                                                                                                                                                                                                                                                                                                                                                                                                                                                                                                                                                                                                                                                                                                                                                                                                                                                                                                                                                                                                                                                                                                                                                                                                                                                                                                                                                                                                                                                                                                                                                                                                                                                                                                                                                                                                                                                                                                                                                                                                                                                                                                                                                                                                                                                                                                                                                                                                                                                                                                                                                                                                                                                                                                                                                                                                                                                                                                                                                                                                                                                                                                                                                                                                                                                                                                                                                                                                                                                                                                                                                                                                                                                                                                                     | -9.76  | 24.14 | 6.39 | P |  | OUT |
| QL03686 | Butanamide, N-(4-amino-2-hydroxyphenyl)-2,2,3,3,4,4,4-hept     | 847-51-8     | NC1ccc(NC(=O)C(F)C(F)C(F)C(F)C(F)C(F)C(F)C(F)C(F)C(F)C(F)C(F)C(F)C(F)C(F)C(F)C(F)C(F)C(F)C(F)C(F)C(F)C(F)C(F)C(F)C(F)C(F)C(F)C(F)C(F)C(F)C(F)C(F)C(F)C(F)C(F)C(F)C(F)C(F)C(F)C(F)C(F)C(F)C(F)C(F)C(F)C(F)C(F)C(F)C(F)C(F)C(F)C(F)C(F)C(F)C(F)C(F)C(F)C(F)C(F)C(F)C(F)C(F)C(F)C(F)C(F)C(F)C(F)C(F)C(F)C(F)C(F)C(F)C(F)C(F)C(F)C(F)C(F)C(F)C(F)C(F)C(F)C(F)C(F)C(F)C(F)C(F)C(F)C(F)C(F)C(F)C(F)C(F)C(F)C(F)C(F)C(F)C(F)C(F)C(F)C(F)C(F)C(F)C(F)C(F)C(F)C(F)C(F)C(F)C(F)C(F)C(F)C(F)C(F)C(F)C(F)C(F)C(F)C(F)C(F)C(F)C(F)C(F)C(F)C(F)C(F)C(F)C(F)C(F)C(F)C(F)C(F)C(F)C(F)C(F)C(F)C(F)C(F)C(F)C(F)C(F)C(F)C(F)C(F)C(F)C(F)C(F)C(F)C(F)C(F)C(F)C(F)C(F)C(F)C(F)C(F)C(F)C(F)C(F)C(F)C(F)C(F)C(F)C(F)C(F)C(F)C(F)C(F)C(F)C(F)C(F)C(F)C(F)C(F)C(F)C(F)C(F)C(F)C(F)C(F)C(F)C(F)C(F)C(F)C(F)C(F)C(F)C(F)C(F)C(F)C(F)C(F)C(F)C(F)C(F)C(F)C(F)C(F)C(F)C(F)C(F)C(F)C(F)C(F)C(F)C(F)C(F)C(F)C(F)C(F)C(F)C(F)C(F)C(F)C(F)C(F)C(F)C(F)C(F)C(F)C(F)C(F)C(F)C(F)C(F)C(F)C(F)C(F)C(F)C(F)C(F)C(F)C(F)C(F)C(F)C(F)C(F)C(F)C(F)C(F)C(F)C(F)C(F)C(F)C(F)C(F)C(F)C(F)C(F)C(F)C(F)C(F)C(F)C(F)C(F)C(F)C(F)C(F)C(F)C(F)C(F)C(F)C(F)C(F)C(F)C(F)C(F)C(F)C(F)C(F)C(F)C(F)C(F)C(F)C(F)C(F)C(F)C(F)C(F)C(F)C(F)C(F)C(F)C(F)C(F)C(F)C(F)C(F)C(F)C(F)C(F)C(F)C(F)C(F)C(F)C(F)C(F)C(F)C(F)C(F)C(F)C(F)C(F)C(F)C(F)C(F)C(F)C(F)C(F)C(F)C(F)C(F)C(F)C(F)C(F)C(F)C(F)C(F)C(F)C(F)C(F)C(F)C(F)C(F)C(F)C(F)C(F)C(F)C(F)C(F)C(F)C(F)C(F)C(F)C(F)C(F)C(F)C(F)C(F)C(F)C(F)C(F)C(F)C(F)C(F)C(F)C(F)C(F)C(F)C(F)C(F)C(F)C(F)C(F)C(F)C(F)C(F)C(F)C(F)C(F)C(F)C(F)C(F)C(F)C(F)C(F)C(F)C(F)C(F)C(F)C(F)C(F)C(F)C(F)C(F)C(F)C(F)C(F)C(F)C(F)C(F)C(F)C(F)C(F)C(F)C(F)C(F)C(F)C(F)C(F)C(F)C(F)C(F)C(F)C(F)C(F)C(F)C(F)C(F)C(F)C(F)C(F)C(F)C(F)C(F)C(F)C(F)C(F)C(F)C(F)C(F)C(F)C(F)C(F)C(F)C(F)C(F)C(F)C(F)C(F)C(F)C(F)C(F)C(F)C(F)C(F)C(F)C(F)C(F)C(F)C(F)C(F)C(F)C(F)C(F)C(F)C(F)C(F)C(F)C(F)C(F)C(F)C(F)C(F)C(F)C(F)C(F)C(F)C(F)C(F)C(F)C(F)C(F)C(F)C(F)C(F)C(F)C(F)C(F)C(F)C(F)C(F)C(F)C(F)C(F)C(F)C(F)C(F)C(F)C(F)C(F)C(F)C(F)C(F)C(F)C(F)C(F)C(F)C(F)C(F)C(F)C(F)C(F)C(F)C(F)C(F)C(F)C(F)C(F)C(F)C(F)C(F)C(F)C(F)C(F)C(F)C(F)C(F)C(F)C(F)C(F)C(F)C(F)C(F)C(F)C(F)C(F)C(F)C(F)C(F)C(F)C(F)C(F)C(F)C(F)C(F)C(F)C(F)C(F)C(F)C(F)C(F)C(F)C(F)C(F)C(F)C(F)C(F)C(F)C(F)C(F)C(F)C(F)C(F)C(F)C(F)C(F)C(F)C(F)C(F)C(F)C(F)C(F)C(F)C(F)C(F)C(F)C(F)C(F)C(F)C(F)C(F)C(F)C(F)C(F)C(F)C(F)C(F)C(F)C(F)C(F)C(F)C(F)C(F)C(F)C(F)C(F)C(F)C(F)C(F)C(F)C(F)C(F)C(F)C(F)C(F)C(F)C(F)C(F)C(F)C(F)C(F)C(F)C(F)C(F)C(F)C(F)C(F)C(F)C(F)C(F)C(F)C(F)C(F)C(F)C(F)C(F)C(F)C(F)C(F)C(F)C(F)C(F)C(F)C(F)C(F)C(F)C(F)C(F)C(F)C(F)C(F)C(F)C(F)C(F)C(F)C(F)C(F)C(F)C(F)C(F)C(F)C(F)C(F)C(F)C(F)C(F)C(F)C(F)C(F)C(F)C(F)C(F)C(F)C(F)C(F)C(F)C(F)C(F)C(F)C(F)C(F)C(F)C(F)C(F)C(F)C(F)C(F)C(F)C(F)C(F)C(F)C(F)C(F)C(F)C(F)C(F)C(F)C(F)C(F)C(F)C(F)C(F)C(F)C(F)C(F)C(F)C(F)C(F)C(F)C(F)C(F)C(F)C(F)C(F)C(F)C(F)C(F)C(F)C(F)C(F)C(F)C(F)C(F)C(F)C(F)C(F)C(F)C(F)C(F)C(F)C(F)C(F)C(F)C(F)C(F)C(F)C(F)C(F)C(F)C(F)C(F)C(F)C(F)C(F)C(F)C(F)C(F)C(F)C(F)C(F)C(F)C(F)C(F)C(F)C(F)C(F)C(F)C(F)C(F)C(F)C(F)C(F)C(F)C(F)C(F)C(F)C(F)C(F)C(F)C(F)C(F)C(F)C(F)C(F)C(F)C(F)C(F)C(F)C(F)C(F)C(F)C(F)C(F)C(F)C(F)C(F)C(F)C(F)C(F)C(F)C(F)C(F)C(F)C(F)C(F)C(F)C(F)C(F)C(F)C(F)C(F)C(F)C(F)C(F)C(F)C(F)C(F)C(F)C(F)C(F)C(F)C(F)C(F)C(F)C(F)C(F)C(F)C(F)C(F)C(F)C(F)C(F)C(F)C(F)C(F)C(F)C(F)C(F)C(F)C(F)C(F)C(F)C(F)C(F)C(F)C(F)C(F)C(F)C(F)C(F)C(F)C(F)C(F)C(F)C(F)C(F)C(F)C(F)C(F)C(F)C(F)C(F)C(F)C(F)C(F)C(F)C(F)C(F)C(F)C(F)C(F)C(F)C(F)C(F)C(F)C(F)C(F)C(F)C(F)C(F)C(F)C(F)C(F)C(F)C(F)C(F)C(F)C(F)C(F)C(F)C(F)C(F)C(F)C(F)C(F)C(F)C(F)C(F)C(F)C(F)C(F)C(F)C(F)C(F)C(F)C(F)C(F)C(F)C(F)C(F)C(F)C(F)C(F)C(F)C(F)C(F)C(F)C(F)C(F)C(F)C(F)C(F)C(F)C(F)C(F)C(F)C(F)C(F)C(F)C(F)C(F)C(F)C(F)C(F)C(F)C(F)C(F)C(F)C(F)C(F)C(F)C(F)C(F)C(F)C(F)C(F)C(F)C(F)C(F)C(F)C(F)C(F)C(F)C(F)C(F)C(F)C(F)C(F)C(F)C(F)C(F)C(F)C(F)C(F)C(F)C(F)C(F)C(F)C(F)C(F)C(F)C(F)C(F)C(F)C(F)C(F)C(F)C(F)C(F)C(F)C(F)C(F)C(F)C(F)C(F)C(F)C(F)C(F)C(F)C(F)C(F)C(F)C(F)C(F)C(F)C(F)C(F)C(F)C(F)C(F)C(F)C(F)C(F)C(F)C(F)C(F)C(F)C(F)C(F)C(F)C(F)C(F)C(F)C(F)C(F)C(F)C(F)C(F)C(F)C(F)C(F)C(F)C(F)C(F)C(F)C(F)C(F)C(F)C(F)C(F)C(F)C(F)C(F)C(F)C(F)C(F)C(F)C(F)C(F)C(F)C(F)C(F)C(F)C(F)C(F)C(F)C(F)C(F)C(F)C(F)C(F)C(F)C(F)C(F)C(F)C(F)C(F)C(F)C(F)C(F)C(F)C(F)C(F)C(F)C(F)C(F)C(F)C(F)C(F)C(F)C(F)C(F)C(F)C(F)C(F)C(F)C(F)C(F)C(F)C(F)C(F)C(F)C(F)C(F)C(F)C(F)C(F)C(F)C(F)C(F)C(F)C(F)C(F)C(F)C(F)C(F)C(F)C(F)C(F)C(F)C(F)C(F)C(F)C(F)C(F)C(F)C(F)C(F)C(F)C(F)C(F)C(F)C(F)C(F)C(F)C(F)C(F)C(F)C(F)C(F)C(F)C(F)C(F)C(F)C(F)C(F)C(F)C(F)C(F)C(F)C(F)C(F)C(F)C(F)C(F)C(F)C(F)C(F)C(F)C(F)C(F)C(F)C(F)C(F)C(F)C(F)C(F)C(F)C(F)C(F)C(F)C(F)C(F)C(F)C(F)C(F)C(F)C(F)C(F)C(F)C(F)C(F)C(F)C(F)C(F)C(F)C(F)C(F)C(F)C(F)C(F)C(F)C(F)C(F)C(F)C(F)C(F)C(F)C(F)C(F)C(F)C(F)C(F)C(F)C(F)C(F)C(F)C(F)C(F)C(F)C(F)C(F)C(F)C(F)C(F)C(F)C(F)C(F)C(F)C(F)C(F)C(F)C(F)C(F)C(F)C(F)C(F)C(F)C(F)C(F)C(F)C(F)C(F)C(F)C(F)C(F)C(F)C(F)C(F)C(F)C(F)C(F)C(F)C(F)C(F)C(F)C(F)C(F)C(F)C(F)C(F)C(F)C(F)C(F)C(F)C(F)C(F)C(F)C(F)C(F)C(F)C(F)C(F)C(F)C(F)C(F)C(F)C(F)C(F)C(F)C(F)C(F)C(F)C(F)C(F)C(F)C(F)C(F)C(F)C(F)C(F)C(F)C(F)C(F)C(F)C(F)C(F)C(F)C(F)C(F)C(F)C(F)C(F)C(F)C(F)C(F)C(F)C(F)C(F)C(F)C(F)C(F)C(F)C(F)C(F)C(F)C(F)C(F)C(F)C(F)C(F)C(F)C(F)C(F)C(F)C(F)C(F)C(F)C(F)C(F)C(F)C(F)C(F)C(F)C(F)C(F)C(F)C(F)C(F)C(F)C(F)C(F)C(F)C(F)C(F)C(F)C(F)C(F)C(F)C(F)C(F)C(F)C(F)C(F)C(F)C(F)C(F)C(F)C(F)C(F)C(F)C(F)C(F)C(F)C(F)C(F)C(F)C(F)C(F)C(F)C(F)C(F)C(F)C(F)C(F)C(F)C(F)C(F)C(F)C(F)C(F)C(F)C(F)C(F)C(F)C(F)C(F)C(F)C(F)C(F)C(F)C(F)C(F)C(F)C(F)C(F)C(F)C(F)C(F)C(F)C(F)C(F)C(F)C(F)C(F)C(F)C(F)C(F)C(F)C(F)C(F)C(F)C(F)C(F)C(F)C(F)C(F)C(F)C(F)C(F)C(F)C(F)C(F)C(F)C(F)C(F)C(F)C(F)C(F)C(F)C(F)C(F)C(F)C(F)C(F)C(F)C(F)C(F)C(F)C(F)C(F)C(F)C(F)C(F)C(F)C(F)C(F)C(F)C(F)C(F)C(F)C(F)C(F)C(F)C(F)C(F)C(F)C(F)C(F)C(F)C(F)C(F)C(F)C(F)C(F)C(F)C(F)C(F)C(F)C(F)C(F)C(F)C(F)C(F)C(F)C(F)C(F)C(F)C(F)C(F)C(F)C(F)C(F)C(F)C(F)C(F)C(F)C(F)C(F)C(F)C(F)C(F)C(F)C(F)C(F)C(F)C(F)C(F)C(F)C(F)C(F)C(F)C(F)C(F)C(F)C(F)C(F)C(F)C(F)C(F)C(F)C(F)C(F)C(F)C(F)C(F)C(F)C(F)C(F)C(F)C(F)C(F)C(F)C(F)C(F)C(F)C(F)C(F)C(F)C(F)C(F)C(F)C(F)C(F)C(F)C(F)C(F)C(F)C(F)C(F)C(F)C(F)C(F)C(F)C(F)C(F)C(F)C(F)C(F)C(F)C(F)C(F)C(F)C(F)C(F)C(F)C(F)C(F)C(F)C(F)C(F)C(F)C(F)C(F)C(F)C(F)C(F)C(F)C(F)C(F)C(F)C(F)C(F)C(F)C(F)C(F)C(F)C(F)C(F)C(F)C(F)C(F)C(F)C(F)C(F)C(F)C(F)C(F)C(F)C(F)C(F)C(F)C(F)C(F)C(F)C(F)C(F)C(F)C(F)C(F)C(F)C(F)C(F)C(F)C(F)C(F)C(F)C(F)C(F)C(F)C |        |       |      |   |  |     |



[illegible]



[illegible]



[illegible]



|         |                                                                                                                |             |                                                                                                                                                                                                                                                                                                                                                                                                                                                                                                                                                                                                                                                                                                                                                                                                                                                                                                                                                                                                                                                                                                                                                                                                                                                                                                                                                                                                                                                                                                                                                                                                                                                                                                                                                                                                                                                                                                                                                                                                                                                                                                                                                                                                                                                                                                                                                                                                                                                                                                                                                                                                                                                                                                                                                                                                                                                                                                                                                                                                                                                                                                                                                                                                                                                                                                                                                                                                                                                                                                                                                                                                                                                                                                                                                                                                                                                                                                                                                                                                                                                                                                                                                                                                                                                                                                                                                                                                                                                                                                                                                                                                                                                                                                                                                                                                                                                                                                                                                                                                                                                                                                                                                                                                                                                                                                                                                                          |        |       |  |      |   |  |     |
|---------|----------------------------------------------------------------------------------------------------------------|-------------|--------------------------------------------------------------------------------------------------------------------------------------------------------------------------------------------------------------------------------------------------------------------------------------------------------------------------------------------------------------------------------------------------------------------------------------------------------------------------------------------------------------------------------------------------------------------------------------------------------------------------------------------------------------------------------------------------------------------------------------------------------------------------------------------------------------------------------------------------------------------------------------------------------------------------------------------------------------------------------------------------------------------------------------------------------------------------------------------------------------------------------------------------------------------------------------------------------------------------------------------------------------------------------------------------------------------------------------------------------------------------------------------------------------------------------------------------------------------------------------------------------------------------------------------------------------------------------------------------------------------------------------------------------------------------------------------------------------------------------------------------------------------------------------------------------------------------------------------------------------------------------------------------------------------------------------------------------------------------------------------------------------------------------------------------------------------------------------------------------------------------------------------------------------------------------------------------------------------------------------------------------------------------------------------------------------------------------------------------------------------------------------------------------------------------------------------------------------------------------------------------------------------------------------------------------------------------------------------------------------------------------------------------------------------------------------------------------------------------------------------------------------------------------------------------------------------------------------------------------------------------------------------------------------------------------------------------------------------------------------------------------------------------------------------------------------------------------------------------------------------------------------------------------------------------------------------------------------------------------------------------------------------------------------------------------------------------------------------------------------------------------------------------------------------------------------------------------------------------------------------------------------------------------------------------------------------------------------------------------------------------------------------------------------------------------------------------------------------------------------------------------------------------------------------------------------------------------------------------------------------------------------------------------------------------------------------------------------------------------------------------------------------------------------------------------------------------------------------------------------------------------------------------------------------------------------------------------------------------------------------------------------------------------------------------------------------------------------------------------------------------------------------------------------------------------------------------------------------------------------------------------------------------------------------------------------------------------------------------------------------------------------------------------------------------------------------------------------------------------------------------------------------------------------------------------------------------------------------------------------------------------------------------------------------------------------------------------------------------------------------------------------------------------------------------------------------------------------------------------------------------------------------------------------------------------------------------------------------------------------------------------------------------------------------------------------------------------------------------------------------------|--------|-------|--|------|---|--|-----|
| QL03931 | Perfluoro-4-isopropoxybutanoic acid                                                                            | 801212-59-9 | OC(=O)C(F)(F)C(F)(F)C(F)C(F)OC(F)(C)F(F)C(F)C(F)F                                                                                                                                                                                                                                                                                                                                                                                                                                                                                                                                                                                                                                                                                                                                                                                                                                                                                                                                                                                                                                                                                                                                                                                                                                                                                                                                                                                                                                                                                                                                                                                                                                                                                                                                                                                                                                                                                                                                                                                                                                                                                                                                                                                                                                                                                                                                                                                                                                                                                                                                                                                                                                                                                                                                                                                                                                                                                                                                                                                                                                                                                                                                                                                                                                                                                                                                                                                                                                                                                                                                                                                                                                                                                                                                                                                                                                                                                                                                                                                                                                                                                                                                                                                                                                                                                                                                                                                                                                                                                                                                                                                                                                                                                                                                                                                                                                                                                                                                                                                                                                                                                                                                                                                                                                                                                                                        | -8.75  | 54.17 |  | 5.62 | P |  | IN  |
| QL03932 | 4-(1,2-Dichloro-1,2,2-trifluoroethoxy)-2,2,3,3,4,4-hexafluorobutanoic acid                                     | 86556-81-2  | OC(=O)C(F)(F)C(F)(F)C(F)C(F)C(F)OC(Cl)C(Cl)C(F)F                                                                                                                                                                                                                                                                                                                                                                                                                                                                                                                                                                                                                                                                                                                                                                                                                                                                                                                                                                                                                                                                                                                                                                                                                                                                                                                                                                                                                                                                                                                                                                                                                                                                                                                                                                                                                                                                                                                                                                                                                                                                                                                                                                                                                                                                                                                                                                                                                                                                                                                                                                                                                                                                                                                                                                                                                                                                                                                                                                                                                                                                                                                                                                                                                                                                                                                                                                                                                                                                                                                                                                                                                                                                                                                                                                                                                                                                                                                                                                                                                                                                                                                                                                                                                                                                                                                                                                                                                                                                                                                                                                                                                                                                                                                                                                                                                                                                                                                                                                                                                                                                                                                                                                                                                                                                                                                         | -8.13  | 52.38 |  | 5.35 | P |  | IN  |
| QL03933 | Perfluoro(4-methoxybutanoic acid)                                                                              | 863090-89-5 | OC(=O)C(F)(F)C(F)(F)C(F)C(F)OC(F)F                                                                                                                                                                                                                                                                                                                                                                                                                                                                                                                                                                                                                                                                                                                                                                                                                                                                                                                                                                                                                                                                                                                                                                                                                                                                                                                                                                                                                                                                                                                                                                                                                                                                                                                                                                                                                                                                                                                                                                                                                                                                                                                                                                                                                                                                                                                                                                                                                                                                                                                                                                                                                                                                                                                                                                                                                                                                                                                                                                                                                                                                                                                                                                                                                                                                                                                                                                                                                                                                                                                                                                                                                                                                                                                                                                                                                                                                                                                                                                                                                                                                                                                                                                                                                                                                                                                                                                                                                                                                                                                                                                                                                                                                                                                                                                                                                                                                                                                                                                                                                                                                                                                                                                                                                                                                                                                                       | -7.43  | 50.00 |  | 5.04 | P |  | IN  |
| QL03934 | Tetrafluorosuccinic acid                                                                                       | 377-38-8    | OC(=O)C(F)(F)C(F)(F)C(F)C(F)=O                                                                                                                                                                                                                                                                                                                                                                                                                                                                                                                                                                                                                                                                                                                                                                                                                                                                                                                                                                                                                                                                                                                                                                                                                                                                                                                                                                                                                                                                                                                                                                                                                                                                                                                                                                                                                                                                                                                                                                                                                                                                                                                                                                                                                                                                                                                                                                                                                                                                                                                                                                                                                                                                                                                                                                                                                                                                                                                                                                                                                                                                                                                                                                                                                                                                                                                                                                                                                                                                                                                                                                                                                                                                                                                                                                                                                                                                                                                                                                                                                                                                                                                                                                                                                                                                                                                                                                                                                                                                                                                                                                                                                                                                                                                                                                                                                                                                                                                                                                                                                                                                                                                                                                                                                                                                                                                                           | -5.54  | 28.57 |  | 4.37 | P |  | OUT |
| QL03936 | Perfluoro[3,3'-(piperazine-1,4-diyl)dipropanoic acid]                                                          | 948014-40-2 | OC(=O)C(F)(F)C(F)F)N1CC(F)(F)C(F)(F)N(C(F)(F)C(F)C(F)F)C(F)C(F)C(F)F                                                                                                                                                                                                                                                                                                                                                                                                                                                                                                                                                                                                                                                                                                                                                                                                                                                                                                                                                                                                                                                                                                                                                                                                                                                                                                                                                                                                                                                                                                                                                                                                                                                                                                                                                                                                                                                                                                                                                                                                                                                                                                                                                                                                                                                                                                                                                                                                                                                                                                                                                                                                                                                                                                                                                                                                                                                                                                                                                                                                                                                                                                                                                                                                                                                                                                                                                                                                                                                                                                                                                                                                                                                                                                                                                                                                                                                                                                                                                                                                                                                                                                                                                                                                                                                                                                                                                                                                                                                                                                                                                                                                                                                                                                                                                                                                                                                                                                                                                                                                                                                                                                                                                                                                                                                                                                     | -11.17 | 47.06 |  | 6.83 | P |  | OUT |
| QL03937 | Perfluoro-3-[1-(ethenylloxy)propan-2-yl]oxy]propanoic acid                                                     | 69087-46-3  | OC(=O)C(F)(F)C(F)C(F)OC(F)(C(F)(F)F)C(F)C(F)OC(F)=C(F)F                                                                                                                                                                                                                                                                                                                                                                                                                                                                                                                                                                                                                                                                                                                                                                                                                                                                                                                                                                                                                                                                                                                                                                                                                                                                                                                                                                                                                                                                                                                                                                                                                                                                                                                                                                                                                                                                                                                                                                                                                                                                                                                                                                                                                                                                                                                                                                                                                                                                                                                                                                                                                                                                                                                                                                                                                                                                                                                                                                                                                                                                                                                                                                                                                                                                                                                                                                                                                                                                                                                                                                                                                                                                                                                                                                                                                                                                                                                                                                                                                                                                                                                                                                                                                                                                                                                                                                                                                                                                                                                                                                                                                                                                                                                                                                                                                                                                                                                                                                                                                                                                                                                                                                                                                                                                                                                  | -9.01  | 50.00 |  | 5.79 | P |  | IN  |
| QL03938 | Perfluoro-3-ethoxypropanoic acid                                                                               | 377-76-4    | OC(=O)C(F)(F)C(F)C(F)OC(F)(C(F)F)F                                                                                                                                                                                                                                                                                                                                                                                                                                                                                                                                                                                                                                                                                                                                                                                                                                                                                                                                                                                                                                                                                                                                                                                                                                                                                                                                                                                                                                                                                                                                                                                                                                                                                                                                                                                                                                                                                                                                                                                                                                                                                                                                                                                                                                                                                                                                                                                                                                                                                                                                                                                                                                                                                                                                                                                                                                                                                                                                                                                                                                                                                                                                                                                                                                                                                                                                                                                                                                                                                                                                                                                                                                                                                                                                                                                                                                                                                                                                                                                                                                                                                                                                                                                                                                                                                                                                                                                                                                                                                                                                                                                                                                                                                                                                                                                                                                                                                                                                                                                                                                                                                                                                                                                                                                                                                                                                       | -7.41  | 50.00 |  | 5.04 | P |  | IN  |
| QL03939 | Perfluoro-3-methoxypropanoic acid                                                                              | 377-73-1    | OC(=O)C(F)(F)C(F)C(F)OC(F)F                                                                                                                                                                                                                                                                                                                                                                                                                                                                                                                                                                                                                                                                                                                                                                                                                                                                                                                                                                                                                                                                                                                                                                                                                                                                                                                                                                                                                                                                                                                                                                                                                                                                                                                                                                                                                                                                                                                                                                                                                                                                                                                                                                                                                                                                                                                                                                                                                                                                                                                                                                                                                                                                                                                                                                                                                                                                                                                                                                                                                                                                                                                                                                                                                                                                                                                                                                                                                                                                                                                                                                                                                                                                                                                                                                                                                                                                                                                                                                                                                                                                                                                                                                                                                                                                                                                                                                                                                                                                                                                                                                                                                                                                                                                                                                                                                                                                                                                                                                                                                                                                                                                                                                                                                                                                                                                                              | -6.54  | 46.67 |  | 4.66 | P |  | IN  |
| QL03940 | Flupropanate                                                                                                   | 756-09-2    | OC(=O)C(F)(F)C(F)F                                                                                                                                                                                                                                                                                                                                                                                                                                                                                                                                                                                                                                                                                                                                                                                                                                                                                                                                                                                                                                                                                                                                                                                                                                                                                                                                                                                                                                                                                                                                                                                                                                                                                                                                                                                                                                                                                                                                                                                                                                                                                                                                                                                                                                                                                                                                                                                                                                                                                                                                                                                                                                                                                                                                                                                                                                                                                                                                                                                                                                                                                                                                                                                                                                                                                                                                                                                                                                                                                                                                                                                                                                                                                                                                                                                                                                                                                                                                                                                                                                                                                                                                                                                                                                                                                                                                                                                                                                                                                                                                                                                                                                                                                                                                                                                                                                                                                                                                                                                                                                                                                                                                                                                                                                                                                                                                                       | -4.54  | 36.36 |  | 3.83 | P |  | IN  |
| QL03941 | 2,2-Difluoro-3-(nonafluorobutoxy)propanoic acid                                                                | 824393-39-7 | OC(=O)C(F)(F)COC(F)(F)C(F)(F)C(F)(F)C(F)F                                                                                                                                                                                                                                                                                                                                                                                                                                                                                                                                                                                                                                                                                                                                                                                                                                                                                                                                                                                                                                                                                                                                                                                                                                                                                                                                                                                                                                                                                                                                                                                                                                                                                                                                                                                                                                                                                                                                                                                                                                                                                                                                                                                                                                                                                                                                                                                                                                                                                                                                                                                                                                                                                                                                                                                                                                                                                                                                                                                                                                                                                                                                                                                                                                                                                                                                                                                                                                                                                                                                                                                                                                                                                                                                                                                                                                                                                                                                                                                                                                                                                                                                                                                                                                                                                                                                                                                                                                                                                                                                                                                                                                                                                                                                                                                                                                                                                                                                                                                                                                                                                                                                                                                                                                                                                                                                | -8.20  | 45.83 |  | 5.45 | P |  | IN  |
| QL03942 | [(1-Chloro-1,1,2,2,3,3-hexafluoropropan-2-yl)oxy][difluoroacetic acid]                                         | 903523-21-7 | OC(=O)C(F)(F)OC(F)(C(F)F)C(F)C(F)F                                                                                                                                                                                                                                                                                                                                                                                                                                                                                                                                                                                                                                                                                                                                                                                                                                                                                                                                                                                                                                                                                                                                                                                                                                                                                                                                                                                                                                                                                                                                                                                                                                                                                                                                                                                                                                                                                                                                                                                                                                                                                                                                                                                                                                                                                                                                                                                                                                                                                                                                                                                                                                                                                                                                                                                                                                                                                                                                                                                                                                                                                                                                                                                                                                                                                                                                                                                                                                                                                                                                                                                                                                                                                                                                                                                                                                                                                                                                                                                                                                                                                                                                                                                                                                                                                                                                                                                                                                                                                                                                                                                                                                                                                                                                                                                                                                                                                                                                                                                                                                                                                                                                                                                                                                                                                                                                       | -7.41  | 50.00 |  | 5.04 | P |  | IN  |
| QL03943 | Perfluoro-3,6-dioxadecanoic acid                                                                               | 137780-69-9 | OC(=O)C(F)(F)OC(F)C(F)(F)OC(F)(F)C(F)(F)C(F)(F)C(F)F                                                                                                                                                                                                                                                                                                                                                                                                                                                                                                                                                                                                                                                                                                                                                                                                                                                                                                                                                                                                                                                                                                                                                                                                                                                                                                                                                                                                                                                                                                                                                                                                                                                                                                                                                                                                                                                                                                                                                                                                                                                                                                                                                                                                                                                                                                                                                                                                                                                                                                                                                                                                                                                                                                                                                                                                                                                                                                                                                                                                                                                                                                                                                                                                                                                                                                                                                                                                                                                                                                                                                                                                                                                                                                                                                                                                                                                                                                                                                                                                                                                                                                                                                                                                                                                                                                                                                                                                                                                                                                                                                                                                                                                                                                                                                                                                                                                                                                                                                                                                                                                                                                                                                                                                                                                                                                                     | -9.40  | 53.57 |  | 5.94 | P |  | IN  |
| QL03944 | Perfluoro-3,6-dioxadecanoic acid                                                                               | 80153-82-8  | OC(=O)C(F)(F)OC(F)C(F)(F)OC(F)(C(F)F)C(F)F                                                                                                                                                                                                                                                                                                                                                                                                                                                                                                                                                                                                                                                                                                                                                                                                                                                                                                                                                                                                                                                                                                                                                                                                                                                                                                                                                                                                                                                                                                                                                                                                                                                                                                                                                                                                                                                                                                                                                                                                                                                                                                                                                                                                                                                                                                                                                                                                                                                                                                                                                                                                                                                                                                                                                                                                                                                                                                                                                                                                                                                                                                                                                                                                                                                                                                                                                                                                                                                                                                                                                                                                                                                                                                                                                                                                                                                                                                                                                                                                                                                                                                                                                                                                                                                                                                                                                                                                                                                                                                                                                                                                                                                                                                                                                                                                                                                                                                                                                                                                                                                                                                                                                                                                                                                                                                                               | -8.28  | 50.00 |  | 5.45 | P |  | IN  |
| QL03945 | Perfluoro-3,6,9-trioxadecanoic acid                                                                            | 330562-41-9 | OC(=O)C(F)(F)OC(F)C(F)(F)OC(F)(C(F)F)C(F)C(F)C(F)C(F)F                                                                                                                                                                                                                                                                                                                                                                                                                                                                                                                                                                                                                                                                                                                                                                                                                                                                                                                                                                                                                                                                                                                                                                                                                                                                                                                                                                                                                                                                                                                                                                                                                                                                                                                                                                                                                                                                                                                                                                                                                                                                                                                                                                                                                                                                                                                                                                                                                                                                                                                                                                                                                                                                                                                                                                                                                                                                                                                                                                                                                                                                                                                                                                                                                                                                                                                                                                                                                                                                                                                                                                                                                                                                                                                                                                                                                                                                                                                                                                                                                                                                                                                                                                                                                                                                                                                                                                                                                                                                                                                                                                                                                                                                                                                                                                                                                                                                                                                                                                                                                                                                                                                                                                                                                                                                                                                   | -10.39 | 54.29 |  | 6.39 | P |  | IN  |
| QL03946 | Perfluoro-3,6,9-trioxadecane-1,11-dioic acid                                                                   | 55621-18-6  | OC(=O)C(F)(F)OC(F)C(F)(F)OC(F)(C(F)F)C(F)C(F)C(F)C(O)=O                                                                                                                                                                                                                                                                                                                                                                                                                                                                                                                                                                                                                                                                                                                                                                                                                                                                                                                                                                                                                                                                                                                                                                                                                                                                                                                                                                                                                                                                                                                                                                                                                                                                                                                                                                                                                                                                                                                                                                                                                                                                                                                                                                                                                                                                                                                                                                                                                                                                                                                                                                                                                                                                                                                                                                                                                                                                                                                                                                                                                                                                                                                                                                                                                                                                                                                                                                                                                                                                                                                                                                                                                                                                                                                                                                                                                                                                                                                                                                                                                                                                                                                                                                                                                                                                                                                                                                                                                                                                                                                                                                                                                                                                                                                                                                                                                                                                                                                                                                                                                                                                                                                                                                                                                                                                                                                  | -9.15  | 41.38 |  | 5.94 | P |  | IN  |
| QL03947 | Perfluoro-3,6,9-trioxadecanoic acid                                                                            | 151772-59-7 | OC(=O)C(F)(F)OC(F)C(F)(F)OC(F)(C(F)F)C(F)C(F)C(F)C(F)F                                                                                                                                                                                                                                                                                                                                                                                                                                                                                                                                                                                                                                                                                                                                                                                                                                                                                                                                                                                                                                                                                                                                                                                                                                                                                                                                                                                                                                                                                                                                                                                                                                                                                                                                                                                                                                                                                                                                                                                                                                                                                                                                                                                                                                                                                                                                                                                                                                                                                                                                                                                                                                                                                                                                                                                                                                                                                                                                                                                                                                                                                                                                                                                                                                                                                                                                                                                                                                                                                                                                                                                                                                                                                                                                                                                                                                                                                                                                                                                                                                                                                                                                                                                                                                                                                                                                                                                                                                                                                                                                                                                                                                                                                                                                                                                                                                                                                                                                                                                                                                                                                                                                                                                                                                                                                                                   | -9.01  | 50.00 |  | 5.79 | P |  | IN  |
| QL03948 | Perfluoro-3,6-dioxaoctane-1,8-dioic acid                                                                       | 55621-21-1  | OC(=O)C(F)(F)OC(F)C(F)(F)OC(F)(C(F)F)C(F)C(F)C(O)=O                                                                                                                                                                                                                                                                                                                                                                                                                                                                                                                                                                                                                                                                                                                                                                                                                                                                                                                                                                                                                                                                                                                                                                                                                                                                                                                                                                                                                                                                                                                                                                                                                                                                                                                                                                                                                                                                                                                                                                                                                                                                                                                                                                                                                                                                                                                                                                                                                                                                                                                                                                                                                                                                                                                                                                                                                                                                                                                                                                                                                                                                                                                                                                                                                                                                                                                                                                                                                                                                                                                                                                                                                                                                                                                                                                                                                                                                                                                                                                                                                                                                                                                                                                                                                                                                                                                                                                                                                                                                                                                                                                                                                                                                                                                                                                                                                                                                                                                                                                                                                                                                                                                                                                                                                                                                                                                      | -7.80  | 36.36 |  | 5.35 | P |  | IN  |
| QL03949 | Perfluoro-3,6-dioxahепtanoic acid                                                                              | 151772-58-6 | OC(=O)C(F)(F)OC(F)C(F)(F)OC(F)F                                                                                                                                                                                                                                                                                                                                                                                                                                                                                                                                                                                                                                                                                                                                                                                                                                                                                                                                                                                                                                                                                                                                                                                                                                                                                                                                                                                                                                                                                                                                                                                                                                                                                                                                                                                                                                                                                                                                                                                                                                                                                                                                                                                                                                                                                                                                                                                                                                                                                                                                                                                                                                                                                                                                                                                                                                                                                                                                                                                                                                                                                                                                                                                                                                                                                                                                                                                                                                                                                                                                                                                                                                                                                                                                                                                                                                                                                                                                                                                                                                                                                                                                                                                                                                                                                                                                                                                                                                                                                                                                                                                                                                                                                                                                                                                                                                                                                                                                                                                                                                                                                                                                                                                                                                                                                                                                          | -7.59  | 47.37 |  | 5.15 | P |  | IN  |
| QL03950 | 3-Azido-2,3,3-trifluoro-2-(heptafluoropropoxy)propanoic acid                                                   | 95906-13-1  | OC(=O)C(F)OC(F)(F)C(F)(F)C(F)(F)C(F)C(F)N=[N+]=[N-]                                                                                                                                                                                                                                                                                                                                                                                                                                                                                                                                                                                                                                                                                                                                                                                                                                                                                                                                                                                                                                                                                                                                                                                                                                                                                                                                                                                                                                                                                                                                                                                                                                                                                                                                                                                                                                                                                                                                                                                                                                                                                                                                                                                                                                                                                                                                                                                                                                                                                                                                                                                                                                                                                                                                                                                                                                                                                                                                                                                                                                                                                                                                                                                                                                                                                                                                                                                                                                                                                                                                                                                                                                                                                                                                                                                                                                                                                                                                                                                                                                                                                                                                                                                                                                                                                                                                                                                                                                                                                                                                                                                                                                                                                                                                                                                                                                                                                                                                                                                                                                                                                                                                                                                                                                                                                                                      | -8.34  | 43.48 |  | 5.54 | P |  | IN  |
| QL03951 | Perfluoro-2,5-dimethyl-3,6-dioxanonanonic acid                                                                 | 13252-14-7  | OC(=O)C(F)OC(F)(F)C(F)C(F)OC(F)(C(F)F)C(F)C(F)C(F)C(F)F                                                                                                                                                                                                                                                                                                                                                                                                                                                                                                                                                                                                                                                                                                                                                                                                                                                                                                                                                                                                                                                                                                                                                                                                                                                                                                                                                                                                                                                                                                                                                                                                                                                                                                                                                                                                                                                                                                                                                                                                                                                                                                                                                                                                                                                                                                                                                                                                                                                                                                                                                                                                                                                                                                                                                                                                                                                                                                                                                                                                                                                                                                                                                                                                                                                                                                                                                                                                                                                                                                                                                                                                                                                                                                                                                                                                                                                                                                                                                                                                                                                                                                                                                                                                                                                                                                                                                                                                                                                                                                                                                                                                                                                                                                                                                                                                                                                                                                                                                                                                                                                                                                                                                                                                                                                                                                                  | -9.87  | 54.84 |  | 6.14 | P |  | IN  |
| QL03952 | Perfluoro-(2,5,8-trimethyl-3,6,9-trioxadodecanoic)acid                                                         | 65294-16-8  | OC(=O)C(F)OC(F)(F)C(F)C(F)OC(F)(C(F)F)C(F)C(F)C(F)C(F)C(F)C(F)F                                                                                                                                                                                                                                                                                                                                                                                                                                                                                                                                                                                                                                                                                                                                                                                                                                                                                                                                                                                                                                                                                                                                                                                                                                                                                                                                                                                                                                                                                                                                                                                                                                                                                                                                                                                                                                                                                                                                                                                                                                                                                                                                                                                                                                                                                                                                                                                                                                                                                                                                                                                                                                                                                                                                                                                                                                                                                                                                                                                                                                                                                                                                                                                                                                                                                                                                                                                                                                                                                                                                                                                                                                                                                                                                                                                                                                                                                                                                                                                                                                                                                                                                                                                                                                                                                                                                                                                                                                                                                                                                                                                                                                                                                                                                                                                                                                                                                                                                                                                                                                                                                                                                                                                                                                                                                                          | -11.11 | 56.10 |  | 6.71 | P |  | OUT |
| QL03953 | 2,4,4,5,7,7,8,10,11,13,13,14,14,15,15-Heptadecafluoro-                                                         | 65150-95-0  | OC(=O)C(F)OC(F)(F)C(F)C(F)OC(F)(C(F)F)C(F)C(F)C(F)C(F)C(F)C(F)C(F)F                                                                                                                                                                                                                                                                                                                                                                                                                                                                                                                                                                                                                                                                                                                                                                                                                                                                                                                                                                                                                                                                                                                                                                                                                                                                                                                                                                                                                                                                                                                                                                                                                                                                                                                                                                                                                                                                                                                                                                                                                                                                                                                                                                                                                                                                                                                                                                                                                                                                                                                                                                                                                                                                                                                                                                                                                                                                                                                                                                                                                                                                                                                                                                                                                                                                                                                                                                                                                                                                                                                                                                                                                                                                                                                                                                                                                                                                                                                                                                                                                                                                                                                                                                                                                                                                                                                                                                                                                                                                                                                                                                                                                                                                                                                                                                                                                                                                                                                                                                                                                                                                                                                                                                                                                                                                                                      | -12.06 | 56.86 |  | 7.15 | P |  | OUT |
| QL03954 | Perfluoro(2,5,8,11,14-pentamethyl-3,6,9,12,15-pentaooxaocta-3-(perfluoroisopropyl)-(2E)-difluoropropenoic acid | 52481-85-3  | F)C(F)C(F)C(F)C(F)C(F)C(F)C(F)C(F)F                                                                                                                                                                                                                                                                                                                                                                                                                                                                                                                                                                                                                                                                                                                                                                                                                                                                                                                                                                                                                                                                                                                                                                                                                                                                                                                                                                                                                                                                                                                                                                                                                                                                                                                                                                                                                                                                                                                                                                                                                                                                                                                                                                                                                                                                                                                                                                                                                                                                                                                                                                                                                                                                                                                                                                                                                                                                                                                                                                                                                                                                                                                                                                                                                                                                                                                                                                                                                                                                                                                                                                                                                                                                                                                                                                                                                                                                                                                                                                                                                                                                                                                                                                                                                                                                                                                                                                                                                                                                                                                                                                                                                                                                                                                                                                                                                                                                                                                                                                                                                                                                                                                                                                                                                                                                                                                                      | -12.85 | 57.38 |  | 7.51 | P |  | OUT |
| QL03955 | 3-(Perfluoroisopropyl)-(2E)-difluoropropenoic acid                                                             | 103229-89-6 | OC(=O)C(F)=C(F)C(F)C(F)C(F)C(F)F                                                                                                                                                                                                                                                                                                                                                                                                                                                                                                                                                                                                                                                                                                                                                                                                                                                                                                                                                                                                                                                                                                                                                                                                                                                                                                                                                                                                                                                                                                                                                                                                                                                                                                                                                                                                                                                                                                                                                                                                                                                                                                                                                                                                                                                                                                                                                                                                                                                                                                                                                                                                                                                                                                                                                                                                                                                                                                                                                                                                                                                                                                                                                                                                                                                                                                                                                                                                                                                                                                                                                                                                                                                                                                                                                                                                                                                                                                                                                                                                                                                                                                                                                                                                                                                                                                                                                                                                                                                                                                                                                                                                                                                                                                                                                                                                                                                                                                                                                                                                                                                                                                                                                                                                                                                                                                                                         | -7.41  | 50.00 |  | 5.04 | P |  | IN  |
| QL03956 | 2,3,4,4,4-Pentafluoro-3-(trifluoromethyl)butanoic acid                                                         | 917951-62-3 | OC(=O)C(F)C(F)C(F)C(F)C(F)F                                                                                                                                                                                                                                                                                                                                                                                                                                                                                                                                                                                                                                                                                                                                                                                                                                                                                                                                                                                                                                                                                                                                                                                                                                                                                                                                                                                                                                                                                                                                                                                                                                                                                                                                                                                                                                                                                                                                                                                                                                                                                                                                                                                                                                                                                                                                                                                                                                                                                                                                                                                                                                                                                                                                                                                                                                                                                                                                                                                                                                                                                                                                                                                                                                                                                                                                                                                                                                                                                                                                                                                                                                                                                                                                                                                                                                                                                                                                                                                                                                                                                                                                                                                                                                                                                                                                                                                                                                                                                                                                                                                                                                                                                                                                                                                                                                                                                                                                                                                                                                                                                                                                                                                                                                                                                                                                              | -6.83  | 47.06 |  | 4.80 | P |  | IN  |
| QL03957 | (2Z)-4,4,5,5,6,6,6-Heptafluoro-3-phenylhex-2-enoic acid                                                        | 154375-43-6 | OC(=O)C=C(c1ccccc1)C(F)(F)C(F)C(F)F                                                                                                                                                                                                                                                                                                                                                                                                                                                                                                                                                                                                                                                                                                                                                                                                                                                                                                                                                                                                                                                                                                                                                                                                                                                                                                                                                                                                                                                                                                                                                                                                                                                                                                                                                                                                                                                                                                                                                                                                                                                                                                                                                                                                                                                                                                                                                                                                                                                                                                                                                                                                                                                                                                                                                                                                                                                                                                                                                                                                                                                                                                                                                                                                                                                                                                                                                                                                                                                                                                                                                                                                                                                                                                                                                                                                                                                                                                                                                                                                                                                                                                                                                                                                                                                                                                                                                                                                                                                                                                                                                                                                                                                                                                                                                                                                                                                                                                                                                                                                                                                                                                                                                                                                                                                                                                                                      | -8.46  | 25.00 |  | 5.77 | P |  | OUT |
| QL03959 | (3,3,4,4,5,5,6,6,7,7,8,8,9,9,10,10,10-heptadecafluorodecyl) hydroxide                                          | 54950-04-8  | OC(=O)C=C(C)C(=O)CCCC(F)C(F)C(F)C(F)C(F)C(F)C(F)C(F)C(F)F                                                                                                                                                                                                                                                                                                                                                                                                                                                                                                                                                                                                                                                                                                                                                                                                                                                                                                                                                                                                                                                                                                                                                                                                                                                                                                                                                                                                                                                                                                                                                                                                                                                                                                                                                                                                                                                                                                                                                                                                                                                                                                                                                                                                                                                                                                                                                                                                                                                                                                                                                                                                                                                                                                                                                                                                                                                                                                                                                                                                                                                                                                                                                                                                                                                                                                                                                                                                                                                                                                                                                                                                                                                                                                                                                                                                                                                                                                                                                                                                                                                                                                                                                                                                                                                                                                                                                                                                                                                                                                                                                                                                                                                                                                                                                                                                                                                                                                                                                                                                                                                                                                                                                                                                                                                                                                                | -10.22 | 40.48 |  | 6.45 | P |  | IN  |
| QL03960 | 4-[[Heptadecafluoro(octyl)]oxy]-4-oxobut-2-enoic acid                                                          | 152682-85-4 | OC(=O)C=C(C)C(=O)OC(F)C(F)C(F)C(F)C(F)C(F)C(F)C(F)C(F)F                                                                                                                                                                                                                                                                                                                                                                                                                                                                                                                                                                                                                                                                                                                                                                                                                                                                                                                                                                                                                                                                                                                                                                                                                                                                                                                                                                                                                                                                                                                                                                                                                                                                                                                                                                                                                                                                                                                                                                                                                                                                                                                                                                                                                                                                                                                                                                                                                                                                                                                                                                                                                                                                                                                                                                                                                                                                                                                                                                                                                                                                                                                                                                                                                                                                                                                                                                                                                                                                                                                                                                                                                                                                                                                                                                                                                                                                                                                                                                                                                                                                                                                                                                                                                                                                                                                                                                                                                                                                                                                                                                                                                                                                                                                                                                                                                                                                                                                                                                                                                                                                                                                                                                                                                                                                                                                  | -10.11 | 47.22 |  | 6.33 | P |  | IN  |
| QL03961 | (Perfluoro-octyl)ethyl hydrogen fumarate                                                                       | 86130-60-1  | OC(=O)C=C(C)C(=O)CCCC(F)C(F)C(F)C(F)C(F)C(F)C(F)C(F)C(F)F                                                                                                                                                                                                                                                                                                                                                                                                                                                                                                                                                                                                                                                                                                                                                                                                                                                                                                                                                                                                                                                                                                                                                                                                                                                                                                                                                                                                                                                                                                                                                                                                                                                                                                                                                                                                                                                                                                                                                                                                                                                                                                                                                                                                                                                                                                                                                                                                                                                                                                                                                                                                                                                                                                                                                                                                                                                                                                                                                                                                                                                                                                                                                                                                                                                                                                                                                                                                                                                                                                                                                                                                                                                                                                                                                                                                                                                                                                                                                                                                                                                                                                                                                                                                                                                                                                                                                                                                                                                                                                                                                                                                                                                                                                                                                                                                                                                                                                                                                                                                                                                                                                                                                                                                                                                                                                                | -10.22 | 40.48 |  | 6.45 | P |  | IN  |
| QL03962 | 4,4,5,5,6,6,6-Heptafluorohex-2-enoic acid                                                                      | 356-03-6    | OC(=O)C=C(C)C(F)C(F)C(F)C(F)F                                                                                                                                                                                                                                                                                                                                                                                                                                                                                                                                                                                                                                                                                                                                                                                                                                                                                                                                                                                                                                                                                                                                                                                                                                                                                                                                                                                                                                                                                                                                                                                                                                                                                                                                                                                                                                                                                                                                                                                                                                                                                                                                                                                                                                                                                                                                                                                                                                                                                                                                                                                                                                                                                                                                                                                                                                                                                                                                                                                                                                                                                                                                                                                                                                                                                                                                                                                                                                                                                                                                                                                                                                                                                                                                                                                                                                                                                                                                                                                                                                                                                                                                                                                                                                                                                                                                                                                                                                                                                                                                                                                                                                                                                                                                                                                                                                                                                                                                                                                                                                                                                                                                                                                                                                                                                                                                            | -6.66  | 38.89 |  | 4.80 | P |  | IN  |
| QL03964 | 5-[[Heptadecafluorononenyloxy]-1,3-benzenedicarboxylic acid                                                    | 96210-37-6  | OC(=O)C1=CC=CC(OC(F)=C(F)C(F)C(F)C(F)C(F)C(F)C(F)C(F)C(F)C(F)C(F)C(F)C(F)C(F)C(F)C(F)C(F)C(F)C(F)C(F)C(F)C(F)C(F)C(F)C(F)C(F)C(F)C(F)C(F)C(F)C(F)C(F)C(F)C(F)C(F)C(F)C(F)C(F)C(F)C(F)C(F)C(F)C(F)C(F)C(F)C(F)C(F)C(F)C(F)C(F)C(F)C(F)C(F)C(F)C(F)C(F)C(F)C(F)C(F)C(F)C(F)C(F)C(F)C(F)C(F)C(F)C(F)C(F)C(F)C(F)C(F)C(F)C(F)C(F)C(F)C(F)C(F)C(F)C(F)C(F)C(F)C(F)C(F)C(F)C(F)C(F)C(F)C(F)C(F)C(F)C(F)C(F)C(F)C(F)C(F)C(F)C(F)C(F)C(F)C(F)C(F)C(F)C(F)C(F)C(F)C(F)C(F)C(F)C(F)C(F)C(F)C(F)C(F)C(F)C(F)C(F)C(F)C(F)C(F)C(F)C(F)C(F)C(F)C(F)C(F)C(F)C(F)C(F)C(F)C(F)C(F)C(F)C(F)C(F)C(F)C(F)C(F)C(F)C(F)C(F)C(F)C(F)C(F)C(F)C(F)C(F)C(F)C(F)C(F)C(F)C(F)C(F)C(F)C(F)C(F)C(F)C(F)C(F)C(F)C(F)C(F)C(F)C(F)C(F)C(F)C(F)C(F)C(F)C(F)C(F)C(F)C(F)C(F)C(F)C(F)C(F)C(F)C(F)C(F)C(F)C(F)C(F)C(F)C(F)C(F)C(F)C(F)C(F)C(F)C(F)C(F)C(F)C(F)C(F)C(F)C(F)C(F)C(F)C(F)C(F)C(F)C(F)C(F)C(F)C(F)C(F)C(F)C(F)C(F)C(F)C(F)C(F)C(F)C(F)C(F)C(F)C(F)C(F)C(F)C(F)C(F)C(F)C(F)C(F)C(F)C(F)C(F)C(F)C(F)C(F)C(F)C(F)C(F)C(F)C(F)C(F)C(F)C(F)C(F)C(F)C(F)C(F)C(F)C(F)C(F)C(F)C(F)C(F)C(F)C(F)C(F)C(F)C(F)C(F)C(F)C(F)C(F)C(F)C(F)C(F)C(F)C(F)C(F)C(F)C(F)C(F)C(F)C(F)C(F)C(F)C(F)C(F)C(F)C(F)C(F)C(F)C(F)C(F)C(F)C(F)C(F)C(F)C(F)C(F)C(F)C(F)C(F)C(F)C(F)C(F)C(F)C(F)C(F)C(F)C(F)C(F)C(F)C(F)C(F)C(F)C(F)C(F)C(F)C(F)C(F)C(F)C(F)C(F)C(F)C(F)C(F)C(F)C(F)C(F)C(F)C(F)C(F)C(F)C(F)C(F)C(F)C(F)C(F)C(F)C(F)C(F)C(F)C(F)C(F)C(F)C(F)C(F)C(F)C(F)C(F)C(F)C(F)C(F)C(F)C(F)C(F)C(F)C(F)C(F)C(F)C(F)C(F)C(F)C(F)C(F)C(F)C(F)C(F)C(F)C(F)C(F)C(F)C(F)C(F)C(F)C(F)C(F)C(F)C(F)C(F)C(F)C(F)C(F)C(F)C(F)C(F)C(F)C(F)C(F)C(F)C(F)C(F)C(F)C(F)C(F)C(F)C(F)C(F)C(F)C(F)C(F)C(F)C(F)C(F)C(F)C(F)C(F)C(F)C(F)C(F)C(F)C(F)C(F)C(F)C(F)C(F)C(F)C(F)C(F)C(F)C(F)C(F)C(F)C(F)C(F)C(F)C(F)C(F)C(F)C(F)C(F)C(F)C(F)C(F)C(F)C(F)C(F)C(F)C(F)C(F)C(F)C(F)C(F)C(F)C(F)C(F)C(F)C(F)C(F)C(F)C(F)C(F)C(F)C(F)C(F)C(F)C(F)C(F)C(F)C(F)C(F)C(F)C(F)C(F)C(F)C(F)C(F)C(F)C(F)C(F)C(F)C(F)C(F)C(F)C(F)C(F)C(F)C(F)C(F)C(F)C(F)C(F)C(F)C(F)C(F)C(F)C(F)C(F)C(F)C(F)C(F)C(F)C(F)C(F)C(F)C(F)C(F)C(F)C(F)C(F)C(F)C(F)C(F)C(F)C(F)C(F)C(F)C(F)C(F)C(F)C(F)C(F)C(F)C(F)C(F)C(F)C(F)C(F)C(F)C(F)C(F)C(F)C(F)C(F)C(F)C(F)C(F)C(F)C(F)C(F)C(F)C(F)C(F)C(F)C(F)C(F)C(F)C(F)C(F)C(F)C(F)C(F)C(F)C(F)C(F)C(F)C(F)C(F)C(F)C(F)C(F)C(F)C(F)C(F)C(F)C(F)C(F)C(F)C(F)C(F)C(F)C(F)C(F)C(F)C(F)C(F)C(F)C(F)C(F)C(F)C(F)C(F)C(F)C(F)C(F)C(F)C(F)C(F)C(F)C(F)C(F)C(F)C(F)C(F)C(F)C(F)C(F)C(F)C(F)C(F)C(F)C(F)C(F)C(F)C(F)C(F)C(F)C(F)C(F)C(F)C(F)C(F)C(F)C(F)C(F)C(F)C(F)C(F)C(F)C(F)C(F)C(F)C(F)C(F)C(F)C(F)C(F)C(F)C(F)C(F)C(F)C(F)C(F)C(F)C(F)C(F)C(F)C(F)C(F)C(F)C(F)C(F)C(F)C(F)C(F)C(F)C(F)C(F)C(F)C(F)C(F)C(F)C(F)C(F)C(F)C(F)C(F)C(F)C(F)C(F)C(F)C(F)C(F)C(F)C(F)C(F)C(F)C(F)C(F)C(F)C(F)C(F)C(F)C(F)C(F)C(F)C(F)C(F)C(F)C(F)C(F)C(F)C(F)C(F)C(F)C(F)C(F)C(F)C(F)C(F)C(F)C(F)C(F)C(F)C(F)C(F)C(F)C(F)C(F)C(F)C(F)C(F)C(F)C(F)C(F)C(F)C(F)C(F)C(F)C(F)C(F)C(F)C(F)C(F)C(F)C(F)C(F)C(F)C(F)C(F)C(F)C(F)C(F)C(F)C(F)C(F)C(F)C(F)C(F)C(F)C(F)C(F)C(F)C(F)C(F)C(F)C(F)C(F)C(F)C(F)C(F)C(F)C(F)C(F)C(F)C(F)C(F)C(F)C(F)C(F)C(F)C(F)C(F)C(F)C(F)C(F)C(F)C(F)C(F)C(F)C(F)C(F)C(F)C(F)C(F)C(F)C(F)C(F)C(F)C(F)C(F)C(F)C(F)C(F)C(F)C(F)C(F)C(F)C(F)C(F)C(F)C(F)C(F)C(F)C(F)C(F)C(F)C(F)C(F)C(F)C(F)C(F)C(F)C(F)C(F)C(F)C(F)C(F)C(F)C(F)C(F)C(F)C(F)C(F)C(F)C(F)C(F)C(F)C(F)C(F)C(F)C(F)C(F)C(F)C(F)C(F)C(F)C(F)C(F)C(F)C(F)C(F)C(F)C(F)C(F)C(F)C(F)C(F)C(F)C(F)C(F)C(F)C(F)C(F)C(F)C(F)C(F)C(F)C(F)C(F)C(F)C(F)C(F)C(F)C(F)C(F)C(F)C(F)C(F)C(F)C(F)C(F)C(F)C(F)C(F)C(F)C(F)C(F)C(F)C(F)C(F)C(F)C(F)C(F)C(F)C(F)C(F)C(F)C(F)C(F)C(F)C(F)C(F)C(F)C(F)C(F)C(F)C(F)C(F)C(F)C(F)C(F)C(F)C(F)C(F)C(F)C(F)C(F)C(F)C(F)C(F)C(F)C(F)C(F)C(F)C(F)C(F)C(F)C(F)C(F)C(F)C(F)C(F)C(F)C(F)C(F)C(F)C(F)C(F)C(F)C(F)C(F)C(F)C(F)C(F)C(F)C(F)C(F)C(F)C(F)C(F)C(F)C(F)C(F)C(F)C(F)C(F)C(F)C(F)C(F)C(F)C(F)C(F)C(F)C(F)C(F)C(F)C(F)C(F)C(F)C(F)C(F)C(F)C(F)C(F)C(F)C(F)C(F)C(F)C(F)C(F)C(F)C(F)C(F)C(F)C(F)C(F)C(F)C(F)C(F)C(F)C(F)C(F)C(F)C(F)C(F)C(F)C(F)C(F)C(F)C(F)C(F)C(F)C(F)C(F)C(F)C(F)C(F)C(F)C(F)C(F)C(F)C(F)C(F)C(F)C(F)C(F)C(F)C(F)C(F)C(F)C(F)C(F)C(F)C(F)C(F)C(F)C(F)C(F)C(F)C(F)C(F)C(F)C(F)C(F)C(F)C(F)C(F)C(F)C(F)C(F)C(F)C(F)C(F)C(F)C(F)C(F)C(F)C(F)C(F)C(F)C(F)C(F)C(F)C(F)C(F)C(F)C(F)C(F)C(F)C(F)C(F)C(F)C(F)C(F)C(F)C(F)C(F)C(F)C(F)C(F)C(F)C(F)C(F)C(F)C(F)C(F)C(F)C(F)C(F)C(F)C(F)C(F)C(F)C(F)C(F)C(F)C(F)C(F)C(F)C(F)C(F)C(F)C(F)C(F)C(F)C(F)C(F)C(F)C(F)C(F)C(F)C(F)C(F)C(F)C(F)C(F)C(F)C(F)C(F)C(F)C(F)C(F)C(F)C(F)C(F)C(F)C(F)C(F)C(F)C(F)C(F)C(F)C(F)C(F)C(F)C(F)C(F)C(F)C(F)C(F)C(F)C(F)C(F)C(F)C(F)C(F)C(F)C(F)C(F)C(F)C(F)C(F)C(F)C(F)C(F)C(F)C(F)C(F)C(F)C(F)C(F)C(F)C(F)C(F)C(F)C(F)C(F)C(F)C(F)C(F)C(F)C(F)C(F)C(F)C(F)C(F)C(F)C(F)C(F)C(F)C(F)C(F)C(F)C(F)C(F)C(F)C(F)C(F)C(F)C(F)C(F)C(F)C(F)C(F)C(F)C(F)C(F)C(F)C(F)C(F)C(F)C(F)C(F)C(F)C(F)C(F)C(F)C(F)C(F)C(F)C(F)C(F)C(F)C(F)C(F)C(F)C(F)C(F)C(F)C(F)C(F)C(F)C(F)C(F)C(F)C(F)C(F)C(F)C(F)C(F)C(F)C(F)C(F)C(F)C(F)C(F)C(F)C(F)C(F)C(F)C(F)C(F)C(F)C(F)C(F)C(F)C(F)C(F)C(F)C(F)C(F)C(F)C(F)C(F)C(F)C(F)C(F)C(F)C(F)C(F)C(F)C(F)C(F)C(F)C(F)C(F)C(F)C(F)C(F)C(F)C(F)C(F)C(F)C(F)C(F)C(F)C(F)C(F)C(F)C(F)C(F)C(F)C(F)C(F)C(F)C(F)C(F)C(F)C(F)C(F)C(F)C(F)C(F)C(F)C(F)C(F)C(F)C(F)C(F)C(F)C(F)C(F)C(F)C(F)C(F)C(F)C(F)C(F)C(F)C(F)C(F)C(F)C(F)C(F)C(F)C(F)C(F)C(F)C(F)C(F)C(F)C(F)C(F)C(F)C(F)C(F)C(F)C(F)C(F)C(F)C(F)C(F)C(F)C(F)C(F)C(F)C(F)C(F)C(F)C(F)C(F)C(F)C(F)C(F)C(F)C(F)C(F)C(F)C(F |        |       |  |      |   |  |     |



[illegible]



[illegible]















[illegible]



|         |                                                                               |                                                                                                   |        |       |      |   |     |
|---------|-------------------------------------------------------------------------------|---------------------------------------------------------------------------------------------------|--------|-------|------|---|-----|
| QL04400 | N-methyl perfluoroalkanesulfonamido quaternary ammonium, n=6                  | S(N(C)CCC[N+](C)(C)C(=O)=O)C(F)(F)C(F)(F)C(F)(F)C(F)(F)C(F)(F)F                                   | -9.42  | 26.53 | 6.21 | P | OUT |
| QL04401 | N-methyl perfluoroalkanesulfonamido quaternary ammonium, n=5                  | S(N(C)CCC[N+](C)(C)C(=O)=O)C(F)(F)C(F)(F)C(F)(F)C(F)(F)F                                          | -8.94  | 23.91 | 6.01 | P | OUT |
| QL04402 | N-methyl perfluoroalkanesulfonamido quaternary ammonium, n=4                  | S(N(C)CCC[N+](C)(C)C(=O)=O)C(F)(F)C(F)(F)C(F)(F)C(F)(F)F                                          | -8.40  | 20.93 | 5.79 | P | OUT |
| QL04403 | N-methyl perfluoroalkanesulfonamido quaternary ammonium, n=3                  | S(N(C)CCC[N+](C)(C)C(=O)=O)C(F)(F)C(F)(F)C(F)(F)F                                                 | -7.80  | 17.50 | 5.54 | P | OUT |
| QL04404 | N-methyl perfluoroalkanesulfonamido quaternary ammonium, n=2                  | S(N(C)CCC[N+](C)(C)C(=O)=O)C(F)(F)C(F)(F)F                                                        | -7.11  | 13.51 | 5.25 | P | OUT |
| QL04405 | perfluoroalkanesulfonamido sulfonate betaine D, n=6                           | S(N(C)CCC[N+](CCCS(=O)O)(O)C(C)C(=O)=O)C(F)(F)C(F)(F)C(F)(F)C(F)(F)C(F)(F)F                       | -10.07 | 22.03 | 6.56 | P | OUT |
| QL04406 | perfluoroalkanesulfonamido sulfonate betaine D, n=5                           | S(N(C)CCC[N+](CCCS(=O)O)(O)C(C)C(=O)=O)C(F)(F)C(F)(F)C(F)(F)C(F)(F)F                              | -9.66  | 19.64 | 6.39 | P | OUT |
| QL04407 | perfluoroalkanesulfonamido sulfonate betaine D, n=4                           | S(N(C)CCC[N+](CCCS(=O)O)(O)C(C)C(=O)=O)C(F)(F)C(F)(F)C(F)(F)F                                     | -9.22  | 16.98 | 6.21 | P | OUT |
| QL04408 | perfluoroalkanesulfonamido sulfonate betaine D, n=3                           | S(N(C)CCC[N+](CCCS(=O)O)(O)C(C)C(=O)=O)C(F)(F)C(F)(F)F                                            | -8.73  | 14.00 | 6.01 | P | OUT |
| QL04409 | perfluoroalkanesulfonamido quaternary ammonium dicarboxylate A, n=6           | S(N(CC(O)=O)CCC[N+](CC(O)=O)C(C)C(=O)=O)C(F)(F)C(F)(F)C(F)(F)C(F)(F)C(F)(F)F                      | -10.10 | 23.64 | 6.56 | P | OUT |
| QL04410 | perfluoroalkanesulfonamido quaternary ammonium dicarboxylate A, n=5           | S(N(CC(O)=O)CCC[N+](CC(O)=O)C(C)C(=O)=O)C(F)(F)C(F)(F)C(F)(F)C(F)(F)F                             | -9.70  | 21.15 | 6.39 | P | OUT |
| QL04411 | perfluoroalkanesulfonamido quaternary ammonium dicarboxylate A, n=4           | S(N(CC(O)=O)CCC[N+](CC(O)=O)C(C)C(=O)=O)C(F)(F)C(F)(F)C(F)(F)F                                    | -9.25  | 18.37 | 6.21 | P | OUT |
| QL04412 | perfluoroalkanesulfonamido quaternary ammonium dicarboxylate A, n=3           | S(N(CC(O)=O)CCC[N+](CC(O)=O)C(C)C(=O)=O)C(F)(F)C(F)(F)F                                           | -8.76  | 15.22 | 6.01 | P | OUT |
| QL04413 | perfluoroalkanesulfonamido quaternary ammonium sulfonate carboxylate B, n F)F | S(N(CC(O)=O)CCC[N+](CC(O)CS(=O)O)(O)C(C)C(=O)=O)C(F)(F)C(F)(F)C(F)(F)C(F)(F)C(F)(F)C(F)(F)F       | -10.47 | 20.63 | 6.76 | P | OUT |
| QL04414 | perfluoroalkanesulfonamido quaternary ammonium sulfonate carboxylate B, n     | S(N(CC(O)=O)CCC[N+](CC(O)CS(=O)O)(O)C(C)C(=O)=O)C(F)(F)C(F)(F)C(F)(F)C(F)(F)F                     | -10.10 | 18.33 | 6.61 | P | OUT |
| QL04415 | perfluoroalkanesulfonamido quaternary ammonium sulfonate carboxylate B, n     | S(N(CC(O)=O)CCC[N+](CC(O)CS(=O)O)(O)C(C)C(=O)=O)C(F)(F)C(F)(F)C(F)(F)C(F)(F)F                     | -9.71  | 15.79 | 6.45 | P | OUT |
| QL04416 | perfluoroalkanesulfonamido quaternary ammonium sulfonate carboxylate B, n     | S(N(CC(O)=O)CCC[N+](CC(O)CS(=O)O)(O)C(C)C(=O)=O)C(F)(F)C(F)(F)C(F)(F)F                            | -9.27  | 12.96 | 6.27 | P | OUT |
| QL04417 | perfluoroalkanesulfonamido quaternary ammonium sulfonate carboxylate A, n     | S(N(CC(O)=O)CCC[N+](CCCS(=O)O)(O)C(C)C(=O)=O)C(F)(F)C(F)(F)C(F)(F)C(F)(F)C(F)(F)F                 | -10.38 | 20.97 | 6.71 | P | OUT |
| QL04418 | perfluoroalkanesulfonamido quaternary ammonium sulfonate carboxylate A, n     | S(N(CC(O)=O)CCC[N+](CCCS(=O)O)(O)C(C)C(=O)=O)C(F)(F)C(F)(F)C(F)(F)C(F)(F)F                        | -10.00 | 18.64 | 6.56 | P | OUT |
| QL04419 | perfluoroalkanesulfonamido quaternary ammonium sulfonate carboxylate A, n     | S(N(CC(O)=O)CCC[N+](CCCS(=O)O)(O)C(C)C(=O)=O)C(F)(F)C(F)(F)C(F)(F)F                               | -9.59  | 16.07 | 6.39 | P | OUT |
| QL04420 | perfluoroalkanesulfonamido quaternary ammonium sulfonate carboxylate A, n     | S(N(CC(O)=O)CCC[N+](CCCS(=O)O)(O)C(C)C(=O)=O)C(F)(F)C(F)(F)F                                      | -9.14  | 13.21 | 6.21 | P | OUT |
| QL04421 | perfluoroalkanesulfonamido quaternary ammonium disulfonate B, n=6             | S(N(CC(O)CS(=O)O)(O)C(C)C(=O)=O)C(C)C(=O)=O)C(F)(F)C(F)(F)C(F)(F)C(F)(F)C(F)(F)F                  | -10.82 | 18.31 | 6.94 | P | OUT |
| QL04422 | perfluoroalkanesulfonamido quaternary ammonium disulfonate B, n=5             | S(N(CC(O)CS(=O)O)(O)C(C)C(=O)=O)C(C)C(=O)=O)C(F)(F)C(F)(F)C(F)(F)C(F)(F)F                         | -10.48 | 16.18 | 6.81 | P | OUT |
| QL04423 | perfluoroalkanesulfonamido quaternary ammonium disulfonate B, n=4             | S(N(CC(O)CS(=O)O)(O)C(C)C(=O)=O)C(C)C(=O)=O)C(F)(F)C(F)(F)C(F)(F)F                                | -10.12 | 13.85 | 6.66 | P | OUT |
| QL04424 | perfluoroalkanesulfonamido quaternary ammonium disulfonate B, n=3             | S(N(CC(O)CS(=O)O)(O)C(C)C(=O)=O)C(C)C(=O)=O)C(F)(F)C(F)(F)F                                       | -9.73  | 11.29 | 6.50 | P | OUT |
| QL04425 | perfluoroalkanesulfonamido quaternary ammonium disulfonate B, n=2             | S(N(CC(O)CS(=O)O)(O)C(C)C(=O)=O)C(C)C(=O)=O)C(F)(F)F                                              | -9.31  | 8.47  | 6.33 | P | OUT |
| QL04426 | perfluoroalkanesulfonamido quaternary diol sulfonic acid, n=6                 | S(N(CC(O)CS(O)(=O)=O)CCC[N+](CCO)(C)C(=O)=O)C(F)(F)C(F)(F)C(F)(F)C(F)(F)C(F)(F)F                  | -10.36 | 20.31 | 6.71 | P | OUT |
| QL04427 | perfluoroalkanesulfonamido quaternary diol sulfonic acid, n=5                 | S(N(CC(O)CS(O)(=O)=O)CCC[N+](CCO)(C)C(=O)=O)C(F)(F)C(F)(F)C(F)(F)C(F)(F)F                         | -9.99  | 18.03 | 6.56 | P | OUT |
| QL04428 | perfluoroalkanesulfonamido quaternary diol sulfonic acid, n=4                 | S(N(CC(O)CS(O)(=O)=O)CCC[N+](CCO)(C)C(=O)=O)C(F)(F)C(F)(F)C(F)(F)F                                | -9.58  | 15.52 | 6.39 | P | OUT |
| QL04429 | perfluoroalkanesulfonamido quaternary diol sulfonic acid, n=3                 | S(N(CC(O)CS(O)(=O)=O)CCC[N+](CCO)(C)C(=O)=O)C(F)(F)C(F)(F)F                                       | -9.13  | 12.73 | 6.21 | P | OUT |
| QL04430 | N-ethyl perfluorodecane sulfonamido acetic acid, n=10                         | S(N(C)CC(C)C(=O)=O)(=O)C(F)(F)C(F)(F)C(F)(F)C(F)(F)C(F)(F)C(F)(F)C(F)(F)C(F)(F)F                  | -10.94 | 42.86 | 6.76 | P | OUT |
| QL04431 | N-ethyl perfluorononane sulfonamido acetic acid, n=9                          | S(N(C)CC(C)C(=O)=O)(=O)C(F)(F)C(F)(F)C(F)(F)C(F)(F)C(F)(F)C(F)(F)C(F)(F)F                         | -10.58 | 41.30 | 6.61 | P | OUT |
| QL04432 | N-ethyl perfluoropropane sulfonamido acetic acid, n=3                         | S(N(C)CC(C)C(=O)=O)(=O)C(F)(F)C(F)(F)F                                                            | -7.56  | 25.00 | 5.35 | P | OUT |
| QL04433 | N-ethyl perfluoroethane sulfonamido acetic acid, n=2                          | S(N(C)CC(C)C(=O)=O)(=O)C(F)(F)F                                                                   | -6.78  | 20.00 | 5.04 | P | OUT |
| QL04434 | perfluoroalkanesulfonamido betaine C, n =6                                    | S(N(C)CCC[N+](CCC(O)=O)C(C)C(=O)=O)C(F)(F)C(F)(F)C(F)(F)C(F)(F)F                                  | -9.96  | 22.41 | 6.50 | P | OUT |
| QL04435 | perfluoroalkanesulfonamido betaine C, n =5                                    | S(N(C)CCC[N+](CCC(O)=O)C(C)C(=O)=O)C(F)(F)C(F)(F)C(F)(F)F                                         | -9.55  | 20.00 | 6.33 | P | OUT |
| QL04436 | perfluoroalkanesulfonamido quaternary ammonium carboxylic acid, n=6           | S(N(CCC(=O)O)CCC[N+](C)C(C)C(=O)=O)C(F)(F)C(F)(F)C(F)(F)C(F)(F)F                                  | -9.87  | 23.64 | 6.45 | P | OUT |
| QL04437 | perfluoroalkanesulfonamido quaternary ammonium carboxylic acid, n=5           | S(N(CCC(=O)O)CCC[N+](C)C(C)C(=O)=O)C(F)(F)C(F)(F)C(F)(F)F                                         | -9.44  | 21.15 | 6.27 | P | OUT |
| QL04438 | perfluoroalkanesulfonamido quaternary ammonium carboxylic acid, n=4           | S(N(CCC(=O)O)CCC[N+](C)C(C)C(=O)=O)C(F)(F)C(F)(F)F                                                | -8.97  | 18.37 | 6.08 | P | OUT |
| QL04439 | perfluoroalkanesulfonamido quaternary ammonium carboxylic acid, n=3           | S(N(CCC(=O)O)CCC[N+](C)C(C)C(=O)=O)C(F)(F)F                                                       | -8.45  | 15.22 | 5.86 | P | OUT |
| QL04440 | perfluoroalkanesulfonamido quaternary ammonium dicarboxylate B, n=6           | S(N(CCC(O)=O)CCC[N+](CC(O)=O)C(C)C(=O)=O)C(F)(F)C(F)(F)C(F)(F)C(F)(F)F                            | -10.19 | 22.41 | 6.61 | P | OUT |
| QL04441 | perfluoroalkanesulfonamido quaternary ammonium dicarboxylate B, n=5           | S(N(CCC(O)=O)CCC[N+](CC(O)=O)C(C)C(=O)=O)C(F)(F)C(F)(F)C(F)(F)F                                   | -9.79  | 20.00 | 6.45 | P | OUT |
| QL04442 | perfluoroalkanesulfonamido quaternary ammonium dicarboxylate B, n=4           | S(N(CCC(O)=O)CCC[N+](CC(O)=O)C(C)C(=O)=O)C(F)(F)C(F)(F)F                                          | -9.36  | 17.31 | 6.27 | P | OUT |
| QL04443 | perfluoroalkanesulfonamido quaternary ammonium dicarboxylate C, n=5           | S(N(CCC(O)=O)CCC[N+](CCC(O)=O)C(C)C(=O)=O)C(F)(F)C(F)(F)F                                         | -10.28 | 21.31 | 6.66 | P | OUT |
| QL04444 | perfluoroalkanesulfonamido quaternary ammonium dicarboxylate C, n=5           | S(N(CCC(O)=O)CCC[N+](CCC(O)=O)C(C)C(=O)=O)C(F)(F)C(F)(F)F                                         | -9.89  | 18.97 | 6.50 | P | OUT |
| QL04445 | perfluoroalkanesulfonamido quaternary ammonium dicarboxylate C, n=4           | S(N(CCC(O)=O)CCC[N+](CCC(O)=O)C(C)C(=O)=O)C(F)(F)C(F)(F)F                                         | -9.47  | 16.36 | 6.33 | P | OUT |
| QL04446 | perfluoroalkanesulfonamido quaternary ammonium dicarboxylate C, n=3           | S(N(CCC(O)=O)CCC[N+](CCC(O)=O)C(C)C(=O)=O)C(F)(F)F                                                | -9.01  | 13.46 | 6.14 | P | OUT |
| QL04447 | perfluorooctanesulfonamido amine carboxylic acid B, n=8                       | S(N(CCC(O)=O)CCCN(C)C(=O)=O)C(F)(F)C(F)(F)C(F)(F)C(F)(F)C(F)(F)C(F)(F)F                           | -10.56 | 29.82 | 6.71 | P | OUT |
| QL04448 | perfluoroheptanesulfonamido amine carboxylic acid B, n=7                      | S(N(CCC(O)=O)CCCN(C)C(=O)=O)C(F)(F)C(F)(F)C(F)(F)C(F)(F)C(F)(F)F                                  | -10.19 | 27.78 | 6.56 | P | OUT |
| QL04449 | perfluorohexanesulfonamido amine carboxylic acid B, n=6                       | S(N(CCC(O)=O)CCCN(C)C(=O)=O)C(F)(F)C(F)(F)C(F)(F)C(F)(F)F                                         | -9.79  | 25.49 | 6.39 | P | OUT |
| QL04450 | perfluoropentanesulfonamido amine carboxylic acid B, n=5                      | S(N(CCC(O)=O)CCCN(C)C(=O)=O)C(F)(F)C(F)(F)C(F)(F)F                                                | -9.34  | 22.92 | 6.21 | P | OUT |
| QL04451 | perfluorobutanesulfonamido amine carboxylic acid B, n=4                       | S(N(CCC(O)=O)CCCN(C)C(=O)=O)C(F)(F)C(F)(F)F                                                       | -8.86  | 20.00 | 6.01 | P | OUT |
| QL04452 | perfluoropropanesulfonamido amine carboxylic acid B, n=3                      | S(N(CCC(O)=O)CCCN(C)C(=O)=O)C(F)(F)F                                                              | -8.31  | 16.67 | 5.79 | P | OUT |
| QL04453 | perfluorohexanesulfonamido amine sulfonic acid, n=6                           | S(N(CCCS(=O)O)(O)C(CO)CCN(C)C(=O)=O)C(F)(F)C(F)(F)C(F)(F)C(F)(F)F                                 | -10.18 | 22.03 | 6.61 | P | OUT |
| QL04454 | perfluoropentanesulfonamido amine sulfonic acid, n=5                          | S(N(CCCS(=O)O)(O)C(CO)CCN(C)C(=O)=O)C(F)(F)C(F)(F)C(F)(F)F                                        | -9.79  | 19.64 | 6.45 | P | OUT |
| QL04455 | perfluoroalkanesulfonamido quaternary ammonium disulfonate A, n=8             | S(N(CCCS(=O)O)(O)C(CO)CC[N+](CCCS(=O)O)(O)C(C)C(=O)=O)C(F)(F)C(F)(F)C(F)(F)C(F)(F)C(F)(F)C(F)(F)F | -11.27 | 22.67 | 7.11 | P | OUT |
| QL04456 | perfluoroalkanesulfonamido quaternary ammonium disulfonate A, n=7             | S(N(CCCS(=O)O)(O)C(CO)CC[N+](CCCS(=O)O)(O)C(C)C(=O)=O)C(F)(F)C(F)(F)C(F)(F)C(F)(F)C(F)(F)F        | -10.96 | 20.83 | 6.99 | P | OUT |
| QL04457 | perfluoroalkanesulfonamido quaternary ammonium disulfonate A, n=6             | S(N(CCCS(=O)O)(O)C(CO)CC[N+](CCCS(=O)O)(O)C(C)C(=O)=O)C(F)(F)C(F)(F)C(F)(F)C(F)(F)F               | -10.64 | 18.84 | 6.85 | P | OUT |
| QL04458 | perfluoroalkanesulfonamido quaternary ammonium disulfonate A, n=5             | S(N(CCCS(=O)O)(O)C(CO)CC[N+](CCCS(=O)O)(O)C(C)C(=O)=O)C(F)(F)C(F)(F)C(F)(F)F                      | -10.29 | 16.67 | 6.71 | P | OUT |
| QL04459 | perfluoroalkanesulfonamido quaternary ammonium disulfonate A, n=4             | S(N(CCCS(=O)O)(O)C(CO)CC[N+](CCCS(=O)O)(O)C(C)C(=O)=O)C(F)(F)C(F)(F)F                             | -9.91  | 14.29 | 6.56 | P | OUT |
| QL04460 | perfluoroalkanesulfonamido quaternary ammonium disulfonate A, n=3             | S(N(CCCS(=O)O)(O)C(CO)CC[N+](CCCS(=O)O)(O)C(C)C(=O)=O)C(F)(F)C(F)(F)F                             | -9.50  | 11.67 | 6.39 | P | OUT |
| QL04461 | perfluoroalkanesulfonamido quaternary ammonium triol sulfonic acid, n=6       | S(N(CCCS(O)=O)C(O)C(CO)CC[N+](CC(CO)O)C(C)C(=O)=O)C(F)(F)C(F)(F)C(F)(F)C(F)(F)C(F)(F)F            | -10.62 | 18.31 | 6.85 | P | OUT |



|         |                                                                          |                                                                                 |        |       |      |   |     |
|---------|--------------------------------------------------------------------------|---------------------------------------------------------------------------------|--------|-------|------|---|-----|
| QL04462 | perfluoroalkanesulfonamid quaternary ammonium triol sulfonic acid, n=5   | S(N(CCCS(O)(=O)=O)C(CO)CC[N+](CC(CO)O)(C)C(=O)(=O)C(F)F(C)F(C)F(C)F(C)F)F       | -10.28 | 16.18 | 6.71 | P | OUT |
| QL04463 | perfluoroalkanesulfonamid quaternary ammonium triol sulfonic acid, n=4   | S(N(CCCS(O)(=O)=O)C(CO)CC[N+](CC(CO)O)(C)C(=O)(=O)C(F)F(C)F(C)F(C)F)F           | -9.90  | 13.85 | 6.56 | P | OUT |
| QL04464 | perfluoroalkanesulfonamid quaternary ammonium triol sulfonic acid, n=3   | S(N(CCCS(O)(=O)=O)C(CO)CC[N+](CC(CO)O)(C)C(=O)(=O)C(F)F(C)F(C)F)F               | -9.49  | 11.29 | 6.39 | P | OUT |
| QL04465 | perfluoroalkanesulfonamid quaternary ammonium triol sulfonic acid, n=2   | S(N(CCCS(O)(=O)=O)C(CO)CC[N+](CC(CO)O)(C)C(=O)(=O)C(F)F(C)F)F                   | -9.04  | 8.47  | 6.21 | P | OUT |
| QL04466 | perfluoroalkanesulfonamid quaternary ammonium alcohol sulfonic acid, n=8 | S(N(CCCS(O)(=O)=O)CCCC[N+](CCO)(C)C(=O)(=O)C(F)F(C)F(C)F(C)F(C)F(C)F(C)F)F      | -10.95 | 24.64 | 6.94 | P | OUT |
| QL04467 | perfluoroalkanesulfonamid quaternary ammonium alcohol sulfonic acid, n=7 | S(N(CCCS(O)(=O)=O)CCCC[N+](CCO)(C)C(=O)(=O)C(F)F(C)F(C)F(C)F(C)F(C)F)F          | -10.62 | 22.73 | 6.81 | P | OUT |
| QL04468 | perfluoroalkanesulfonamid quaternary ammonium alcohol sulfonic acid, n=6 | S(N(CCCS(O)(=O)=O)CCCC[N+](CCO)(C)C(=O)(=O)C(F)F(C)F(C)F(C)F(C)F)F              | -10.26 | 20.63 | 6.66 | P | OUT |
| QL04469 | perfluoroalkanesulfonamid quaternary ammonium alcohol sulfonic acid, n=5 | S(N(CCCS(O)(=O)=O)CCCC[N+](CCO)(C)C(=O)(=O)C(F)F(C)F(C)F(C)F)F                  | -9.88  | 18.33 | 6.50 | P | OUT |
| QL04470 | perfluoroalkanesulfonamid quaternary ammonium alcohol sulfonic acid, n=4 | S(N(CCCS(O)(=O)=O)CCCC[N+](CCO)(C)C(=O)(=O)C(F)F(C)F(C)F)F                      | -9.46  | 15.79 | 6.33 | P | OUT |
| QL04471 | perfluoroalkanesulfonamid quaternary ammonium alcohol sulfonic acid, n=3 | S(N(CCCS(O)(=O)=O)CCCC[N+](CCO)(C)C(=O)(=O)C(F)F(C)F)F                          | -9.00  | 12.96 | 6.14 | P | OUT |
| QL04472 | perfluoroalkanesulfonamid quaternary ammonium alcohol sulfonic acid, n=2 | S(N(CCCS(O)(=O)=O)CCCC[N+](CCO)(C)C(=O)(=O)C(F)F)F                              | -8.49  | 9.80  | 5.94 | P | OUT |
| QL04473 | perfluoroalkanesulfonamid sulfonate betaine E, n=6                       | S(N(CCO)CCC[N+](CC(O)CS(=O)(O)=O)(O)C(=O)C(F)F(C)F(C)F(C)F(C)F)F                | -10.36 | 20.31 | 6.71 | P | OUT |
| QL04474 | perfluoroalkanesulfonamid sulfonate betaine E, n=5                       | S(N(CCO)CCC[N+](CC(O)CS(=O)(O)=O)(O)C(=O)C(F)F(C)F(C)F(C)F)F                    | -9.99  | 18.03 | 6.56 | P | OUT |
| QL04475 | perfluoroalkanesulfonamid sulfonate betaine E, n=4                       | S(N(CCO)CCC[N+](CC(O)CS(=O)(O)=O)(O)C(=O)C(F)F(C)F(C)F)F                        | -9.58  | 15.52 | 6.39 | P | OUT |
| QL04476 | perfluoroalkanesulfonamid sulfonate betaine E, n=3                       | S(N(CCO)CCC[N+](CC(O)CS(=O)(O)=O)(O)C(=O)C(F)F(C)F)F                            | -9.13  | 12.73 | 6.21 | P | OUT |
| QL04477 | perfluoroalkanesulfonamid quaternary ammonium diol B, n=8                | S(N(CCO)CCC[N+](CCO)(C)C(=O)(=O)C(F)F(C)F(C)F(C)F(C)F(C)F(C)F)F                 | -10.60 | 26.98 | 6.76 | P | OUT |
| QL04478 | perfluoroalkanesulfonamid quaternary ammonium diol B, n=7                | S(N(CCO)CCC[N+](CCO)(C)C(=O)(=O)C(F)F(C)F(C)F(C)F(C)F(C)F)F                     | -10.24 | 25.00 | 6.61 | P | OUT |
| QL04479 | perfluoroalkanesulfonamid quaternary ammonium diol B, n=6                | S(N(CCO)CCC[N+](CCO)(C)C(=O)(=O)C(F)F(C)F(C)F(C)F(C)F)F                         | -9.85  | 22.81 | 6.45 | P | OUT |
| QL04480 | perfluoroalkanesulfonamid quaternary ammonium diol B, n=5                | S(N(CCO)CCC[N+](CCO)(C)C(=O)(=O)C(F)F(C)F(C)F(C)F)F                             | -9.42  | 20.37 | 6.27 | P | OUT |
| QL04481 | perfluoroalkanesulfonamid quaternary ammonium diol B, n=4                | S(N(CCO)CCC[N+](CCO)(C)C(=O)(=O)C(F)F(C)F(C)F)F                                 | -8.95  | 17.65 | 6.08 | P | OUT |
| QL04482 | perfluoroalkanesulfonamid quaternary ammonium diol B, n=3                | S(N(CCO)CCC[N+](CCO)(C)C(=O)(=O)C(F)F(C)F)F                                     | -8.43  | 14.58 | 5.86 | P | OUT |
| QL04483 | perfluoroalkanesulfonamid quaternary ammonium diol B, n=2                | S(N(CCO)CCC[N+](CCO)(C)C(=O)(=O)C(F)F)F                                         | -7.85  | 11.11 | 5.62 | P | OUT |
| QL04484 | perfluorohexanesulfonamid amine carboxylic acid A, n=6                   | S(N(C(CO)=O)CCN(C)C(=O)(=O)C(F)F(C)F(C)F(C)F(C)F)F                              | -9.60  | 28.89 | 6.27 | P | OUT |
| QL04485 | perfluoropentanesulfonamid amine carboxylic acid A, n=5                  | S(N(C(CO)=O)CCN(C)C(=O)(=O)C(F)F(C)F(C)F(C)F)F                                  | -9.13  | 26.19 | 6.08 | P | OUT |
| QL04486 | perfluorobutanesulfonamid amine carboxylic acid A, n=4                   | S(N(C(CO)=O)CCN(C)C(=O)(=O)C(F)F(C)F(C)F)F                                      | -8.61  | 23.08 | 5.86 | P | OUT |
| QL04487 | perfluoroalkanesulfonamid quaternary ammonium triol, n=6                 | S(N(C(CO)CC[N+](CC(O)CO)(C)C(=O)(=O)C(F)F(C)F(C)F(C)F(C)F)F                     | -9.96  | 22.41 | 6.50 | P | OUT |
| QL04488 | perfluoroalkanesulfonamid quaternary ammonium triol, n=5                 | S(N(C(CO)CC[N+](CC(O)CO)(C)C(=O)(=O)C(F)F(C)F(C)F(C)F)F                         | -9.55  | 20.00 | 6.33 | P | OUT |
| QL04489 | perfluoroalkanesulfonamid quaternary ammonium triol, n=4                 | S(N(C(CO)CC[N+](CC(O)CO)(C)C(=O)(=O)C(F)F(C)F(C)F)F                             | -9.09  | 17.31 | 6.14 | P | OUT |
| QL04490 | perfluoroalkanesulfonamid quaternary ammonium triol, n=3                 | S(N(C(CO)CC[N+](CC(O)CO)(C)C(=O)(=O)C(F)F(C)F)F                                 | -8.59  | 14.29 | 5.94 | P | OUT |
| QL04491 | perfluoroalkanesulfonamid quaternary ammonium diol A, n=6                | S(N(C(CO)CC[N+](CC(O)CO)(C)C(=O)(=O)C(F)F(C)F(C)F(C)F)F                         | -9.66  | 25.49 | 6.33 | P | OUT |
| QL04492 | perfluoroalkanesulfonamid quaternary ammonium diol A, n=5                | S(N(C(CO)CC[N+](CC(O)CO)(C)C(=O)(=O)C(F)F(C)F(C)F)F                             | -9.21  | 22.92 | 6.14 | P | OUT |
| QL04493 | perfluoroalkanesulfonamid quaternary ammonium diol A, n=4                | S(N(C(CO)CC[N+](CC(O)CO)(C)C(=O)(=O)C(F)F(C)F)F                                 | -8.70  | 20.00 | 5.94 | P | OUT |
| QL04494 | perfluoroalkanesulfonamid quaternary ammonium oxide, n=9                 | S(N(CCC[N+](O-))(O-))(O-)=O)C(F)F(C)F(C)F(C)F(C)F(C)F(C)F)F                     | -10.59 | 36.54 | 6.66 | P | OUT |
| QL04495 | perfluoroalkanesulfonamid quaternary ammonium oxide, n=7                 | S(N(CCC[N+](O-))(O-))(O-)=O)C(F)F(C)F(C)F(C)F(C)F(C)F)F                         | -9.81  | 32.61 | 6.33 | P | OUT |
| QL04496 | perfluoroalkanesulfonamid quaternary ammonium oxide, n= 30295-56-8       | S(N(CCC[N+](O-))(O-))(O-)=O)C(F)F(C)F(C)F(C)F(C)F)F                             | -9.36  | 30.23 | 6.14 | P | OUT |
| QL04497 | perfluoroalkanesulfonamid quaternary ammonium oxide, n=5                 | S(N(CCC[N+](O-))(O-))(O-)=O)C(F)F(C)F(C)F(C)F)F                                 | -8.86  | 27.50 | 5.94 | P | OUT |
| QL04498 | perfluoroalkanesulfonamid quaternary ammonium oxide, n=4                 | S(N(CCC[N+](O-))(O-))(O-)=O)C(F)F(C)F(C)F)F                                     | -8.30  | 24.32 | 5.71 | P | OUT |
| QL04499 | perfluoroalkanesulfonamid quaternary ammonium, n=3                       | S(N(CCC[N+](O-))(O-))(O-)=O)C(F)F(C)F)F                                         | -7.63  | 18.92 | 5.45 | P | OUT |
| QL04500 | perfluoroalkanesulfonamid betaine A, n= 6                                | S(N(CCC[N+](O-))(O-))(O-)=O)C(F)F(C)F(C)F(C)F(C)F)F                             | -9.68  | 26.53 | 6.33 | P | OUT |
| QL04501 | perfluoroalkanesulfonamid betaine A, n= 5                                | S(N(CCC[N+](O-))(O-))(O-)=O)C(F)F(C)F(C)F(C)F)F                                 | -9.23  | 23.91 | 6.14 | P | OUT |
| QL04502 | perfluoroalkanesulfonamid betaine A, n= 4                                | S(N(CCC[N+](O-))(O-))(O-)=O)C(F)F(C)F(C)F)F                                     | -8.72  | 20.93 | 5.94 | P | OUT |
| QL04503 | perfluoroalkanesulfonamid betaine A, n= 3                                | S(N(CCC[N+](O-))(O-))(O-)=O)C(F)F(C)F)F                                         | -8.16  | 17.50 | 5.71 | P | OUT |
| QL04504 | perfluoroalkanesulfonamid sulfonate betaine B, n=9                       | S(N(CCC[N+](O-))(O-))(O-)=O)C(F)F(C)F(C)F(C)F(C)F(C)F(C)F(C)F(C)F(C)F(C)F(C)F)F | -11.13 | 28.79 | 6.99 | P | OUT |
| QL04505 | perfluoroalkanesulfonamid sulfonate betaine B, n=8                       | S(N(CCC[N+](O-))(O-))(O-)=O)C(F)F(C)F(C)F(C)F(C)F(C)F(C)F(C)F(C)F(C)F(C)F(C)F)F | -10.81 | 26.98 | 6.85 | P | OUT |
| QL04506 | perfluoroalkanesulfonamid sulfonate betaine B, n=7                       | S(N(CCC[N+](O-))(O-))(O-)=O)C(F)F(C)F(C)F(C)F(C)F(C)F(C)F(C)F(C)F(C)F(C)F(C)F)F | -10.46 | 25.00 | 6.71 | P | OUT |
| QL04507 | perfluoroalkanesulfonamid sulfonate betaine B, n=6                       | S(N(CCC[N+](O-))(O-))(O-)=O)C(F)F(C)F(C)F(C)F(C)F(C)F(C)F(C)F(C)F(C)F(C)F(C)F)F | -10.09 | 22.81 | 6.56 | P | OUT |
| QL04508 | perfluoroalkanesulfonamid sulfonate betaine B, n=5                       | S(N(CCC[N+](O-))(O-))(O-)=O)C(F)F(C)F(C)F(C)F(C)F(C)F(C)F(C)F(C)F(C)F(C)F(C)F)F | -9.68  | 20.37 | 6.39 | P | OUT |
| QL04509 | perfluoroalkanesulfonamid sulfonate betaine B, n=4                       | S(N(CCC[N+](O-))(O-))(O-)=O)C(F)F(C)F(C)F(C)F(C)F(C)F(C)F(C)F(C)F(C)F(C)F(C)F)F | -9.23  | 17.65 | 6.21 | P | OUT |
| QL04510 | perfluoroalkanesulfonamid sulfonate betaine B, n=3                       | S(N(CCC[N+](O-))(O-))(O-)=O)C(F)F(C)F(C)F(C)F(C)F(C)F(C)F(C)F(C)F(C)F(C)F(C)F)F | -8.74  | 14.58 | 6.01 | P | OUT |
| QL04511 | perfluoroalkanesulfonamid betaine B, n=6                                 | S(N(CCC[N+](O-))(O-))(O-)=O)C(F)F(C)F(C)F(C)F(C)F(C)F(C)F(C)F(C)F(C)F(C)F(C)F)F | -9.78  | 25.00 | 6.39 | P | OUT |
| QL04512 | perfluoroalkanesulfonamid betaine B, n=5                                 | S(N(CCC[N+](O-))(O-))(O-)=O)C(F)F(C)F(C)F(C)F(C)F(C)F(C)F(C)F(C)F(C)F(C)F(C)F)F | -9.33  | 22.45 | 6.21 | P | OUT |
| QL04513 | perfluoroalkanesulfonamid betaine B, n=4                                 | S(N(CCC[N+](O-))(O-))(O-)=O)C(F)F(C)F(C)F(C)F(C)F(C)F(C)F(C)F(C)F(C)F(C)F(C)F)F | -8.85  | 19.57 | 6.01 | P | OUT |
| QL04514 | perfluoroalkanesulfonamid betaine B, n=3                                 | S(N(CCC[N+](O-))(O-))(O-)=O)C(F)F(C)F(C)F(C)F(C)F(C)F(C)F(C)F(C)F(C)F(C)F(C)F)F | -8.31  | 16.28 | 5.79 | P | OUT |
| QL04515 | perfluoroalkanesulfonamid quaternary ammonium diol C, n=6                | S(N(CCC[N+](O-))(O-))(O-)=O)C(F)F(C)F(C)F(C)F(C)F(C)F(C)F(C)F(C)F(C)F(C)F(C)F)F | -9.85  | 22.81 | 6.45 | P | OUT |
| QL04516 | perfluoroalkanesulfonamid quaternary ammonium diol C, n=5                | S(N(CCC[N+](O-))(O-))(O-)=O)C(F)F(C)F(C)F(C)F(C)F(C)F(C)F(C)F(C)F(C)F(C)F(C)F)F | -9.42  | 20.37 | 6.27 | P | OUT |
| QL04517 | perfluoroalkanesulfonamid quaternary ammonium diol C, n=4                | S(N(CCC[N+](O-))(O-))(O-)=O)C(F)F(C)F(C)F(C)F(C)F(C)F(C)F(C)F(C)F(C)F(C)F(C)F)F | -8.95  | 17.65 | 6.08 | P | OUT |
| QL04518 | perfluoroalkanesulfonamid sulfonate betaine A, n=8                       | S(N(CCC[N+](O-))(O-))(O-)=O)C(F)F(C)F(C)F(C)F(C)F(C)F(C)F(C)F(C)F(C)F(C)F(C)F)F | -10.72 | 27.42 | 6.81 | P | OUT |
| QL04519 | perfluoroalkanesulfonamid sulfonate betaine A, n=7                       | S(N(CCC[N+](O-))(O-))(O-)=O)C(F)F(C)F(C)F(C)F(C)F(C)F(C)F(C)F(C)F(C)F(C)F(C)F)F | -10.36 | 25.42 | 6.66 | P | OUT |
| QL04520 | perfluoroalkanesulfonamid sulfonate betaine A, n=6                       | S(N(CCC[N+](O-))(O-))(O-)=O)C(F)F(C)F(C)F(C)F(C)F(C)F(C)F(C)F(C)F(C)F(C)F(C)F)F | -9.98  | 23.21 | 6.50 | P | OUT |
| QL04521 | perfluoroalkanesulfonamid sulfonate betaine A, n=5                       | S(N(CCC[N+](O-))(O-))(O-)=O)C(F)F(C)F(C)F(C)F(C)F(C)F(C)F(C)F(C)F(C)F(C)F(C)F)F | -9.56  | 20.75 | 6.33 | P | OUT |
| QL04522 | perfluoroalkanesulfonamid sulfonate betaine A, n=4                       | S(N(CCC[N+](O-))(O-))(O-)=O)C(F)F(C)F(C)F(C)F(C)F(C)F(C)F(C)F(C)F(C)F(C)F(C)F)F | -9.10  | 18.00 | 6.14 | P | OUT |
| QL04523 | perfluoroalkanesulfonamid sulfonate betaine A, n=3                       | S(N(CCC[N+](O-))(O-))(O-)=O)C(F)F(C)F(C)F(C)F(C)F(C)F(C)F(C)F(C)F(C)F(C)F(C)F)F | -8.60  | 14.89 | 5.94 | P | OUT |
| QL04524 | perfluoroalkanesulfonamid sulfonate betaine C, n=6                       | S(N(CCC[N+](O-))(O-))(O-)=O)C(F)F(C)F(C)F(C)F(C)F(C)F(C)F(C)F(C)F(C)F(C)F(C)F)F | -10.17 | 21.67 | 6.61 | P | OUT |
| QL04525 | perfluoroalkanesulfonamid sulfonate betaine C, n=5                       | S(N(CCC[N+](O-))(O-))(O-)=O)C(F)F(C)F(C)F(C)F(C)F(C)F(C)F(C)F(C)F(C)F(C)F(C)F)F | -9.78  | 19.30 | 6.45 | P | OUT |
| QL04526 | perfluoroalkanesulfonamid sulfonate betaine C, n=4                       | S(N(CCC[N+](O-))(O-))(O-)=O)C(F)F(C)F(C)F(C)F(C)F(C)F(C)F(C)F(C)F(C)F(C)F(C)F)F | -9.35  | 16.67 | 6.27 | P | OUT |
| QL04527 | perfluoroalkanesulfonamid quaternary ammonium alcohol, n=8               | S(N(CCC[N+](O-))(O-))(O-)=O)C(F)F(C)F(C)F(C)F(C)F(C)F(C)F(C)F(C)F(C)F(C)F(C)F)F | -10.35 | 30.36 | 6.61 | P | OUT |



|         |                                                             |                                                                         |       |       |      |   |     |
|---------|-------------------------------------------------------------|-------------------------------------------------------------------------|-------|-------|------|---|-----|
| QL04528 | perfluoroalkanesulfonamido quaternary ammonium alcohol, n=7 | S(NCCC[N+](CCO)(C)C)(=O)(=O)C(F)(F)C(F)(F)C(F)(F)C(F)(F)C(F)(F)C(F)(F)F | -9.97 | 28.30 | 6.45 | P | OUT |
| QL04529 | perfluoroalkanesulfonamido quaternary ammonium alcohol, n=6 | S(NCCC[N+](CCO)(C)C)(=O)(=O)C(F)(F)C(F)(F)C(F)(F)C(F)(F)C(F)(F)C(F)(F)F | -9.54 | 26.00 | 6.27 | P | OUT |
| QL04530 | perfluoroalkanesulfonamido quaternary ammonium alcohol, n=5 | S(NCCC[N+](CCO)(C)C)(=O)(=O)C(F)(F)C(F)(F)C(F)(F)C(F)(F)C(F)(F)C(F)(F)F | -9.07 | 23.40 | 6.08 | P | OUT |
| QL04531 | perfluoroalkanesulfonamido quaternary ammonium alcohol, n=4 | S(NCCC[N+](CCO)(C)C)(=O)(=O)C(F)(F)C(F)(F)C(F)(F)C(F)(F)C(F)(F)F        | -8.56 | 20.45 | 5.86 | P | OUT |
| QL04532 | perfluoroalkanesulfonamido quaternary ammonium alcohol, n=3 | S(NCCC[N+](CCO)(C)C)(=O)(=O)C(F)(F)C(F)(F)C(F)(F)C(F)(F)F               | -7.97 | 17.07 | 5.62 | P | OUT |
| QL04533 | perfluoroalkanesulfonamido quaternary ammonium alcohol, n=2 | S(NCCC[N+](CCO)(C)C)(=O)(=O)C(F)(F)C(F)(F)C(F)(F)F                      | -7.31 | 13.16 | 5.35 | P | OUT |
| QL04534 | perfluoropropanesulfonamido amine, n =3                     | S(NCCC[N+](CCO)(C)C)(=O)(=O)C(F)(F)C(F)(F)C(F)(F)F                      | -7.48 | 21.21 | 5.35 | P | OUT |
| QL04535 | perfluoropropanesulfonamido sulfonic acid, n=6              | S(NCCCN(C)C)(=O)(=O)C(F)(F)C(F)(F)C(F)(F)C(F)(F)F                       | -9.44 | 34.21 | 6.14 | P | OUT |
| QL04536 | perfluoropropanesulfonamido sulfonic acid, n=5              | S(NCCCS(=O)(O)=O)(=O)(=O)C(F)(F)C(F)(F)C(F)(F)C(F)(F)C(F)(F)F           | -8.94 | 31.43 | 5.94 | P | OUT |
| QL04537 | perfluoropropanesulfonamido sulfonic acid, n=4              | S(NCCCS(=O)(O)=O)(=O)(=O)C(F)(F)C(F)(F)C(F)(F)C(F)(F)C(F)(F)F           | -8.38 | 28.13 | 5.71 | P | OUT |
| QL04538 | perfluoropropanesulfonamido sulfonic acid, n=3              | S(NCCCS(=O)(O)=O)(=O)(=O)C(F)(F)C(F)(F)C(F)(F)C(F)(F)F                  | -7.74 | 24.14 | 5.45 | P | OUT |
