# Supplementary material for: How the Structure of Per- and Polyfluoroalkyl Substances (PFAS) Influences Their Binding Potency to the Peroxisome Proliferator-Activated and Thyroid Hormone Receptors—An In Silico Screening Study
Source: MDPI journal article supplement (doi:10.3390/molecules28020479), 2023-01-04
Supplement: s1 [file s1]

| Model information       |                                                                                                                             |
|-------------------------|-----------------------------------------------------------------------------------------------------------------------------|
| Type of model           | MLR                                                                                                                         |
| Data split              | 3:1                                                                                                                         |
| Descriptors             | ICR,X%                                                                                                                      |
| Descriptors correlation | 0.26                                                                                                                        |
| Preprocessing           | Standard scaler - Standardize features by removing the mean and scaling to unit variance.                                   |
| Model equation          | $\text{PPAR}\beta \text{ BS} = -8,248(\pm 0,069) - 1,059(\pm 0,071) \times \text{ICR} - 0,409(\pm 0,071) \times \text{X\%}$ |

| Model statistics           |       |
|----------------------------|-------|
| $R^2$                      | 0.924 |
| $\text{RMSE}_C$            | 0.352 |
| $\text{MAE}_C$             | 0.272 |
| $Q^2_{\text{LOO}}$         | 0.903 |
| $R^2 - Q^2_{\text{LOO}}$   | 0.021 |
| $\text{RMSE}_{CV}$         | 0.398 |
| $\text{MAE}_{CV}$          | 0.304 |
| $\text{CCC}_{CV}$          | 0.950 |
| $Q^2_{F1}$                 | 0.917 |
| $Q^2_{F2}$                 | 0.916 |
| $Q^2_{F3}$                 | 0.922 |
| $\text{RMSE}_{\text{EXT}}$ | 0.359 |
| $\text{MAE}_{\text{EXT}}$  | 0.279 |
| $\text{CCC}_{\text{EXT}}$  | 0.952 |
| $R^2_{Y_{\text{SCR}}}$     | 0.068 |

|                           |       |
|---------------------------|-------|
| MIN binding score (pred.) | -9.88 |
| MAX binding score (pred.) | -4.45 |
| HAT kryt.                 | 0.31  |

| ID | NAME          | CAS         | SMILES                                                                       | binding score<br>(calc.)<br>[kcal/mol] | binding score<br>(pred.)<br>[kcal/mol] | X%    | ICR  | split (t/v) | AD (IN/OUT) |
|----|---------------|-------------|------------------------------------------------------------------------------|----------------------------------------|----------------------------------------|-------|------|-------------|-------------|
| 1  | 10:2FTOH      | 865-86-1    | C(CO)C(C(C(C(C(C(C(C(C(F)(F)F)(F)F)(F)F)(F)F)(F)F)(F)F)(F)F)(F)F)(F)F        | -9.6                                   | -9.61                                  | 53.85 | 2.73 | V           | IN          |
| 2  | 10:2FTUCA     | 70887-94-4  | C(=C(C(C(C(C(C(C(C(C(C(F)(F)F)(F)F)(F)F)(F)F)(F)F)(F)F)(F)F)(F)F)C(=O)O      | -10                                    | -9.73                                  | 55.56 | 2.74 | T           | IN          |
| 3  | 4:2diPAPs     | 135098-69-0 | C(COP(=O)(O)OCCC(C(C(C(C(C(C(C(C(C(F)(F)F)(F)F)(F)F)(F)F)(F)F)(F)F)(F)F)(F)F | -9.8                                   | -9.31                                  | 40.91 | 2.96 | V           | IN          |
| 4  | 4:2FTOH       | 2043-47-2   | C(CO)C(C(C(C(C(F)(F)F)(F)F)(F)F)(F)F                                         | -7.4                                   | -7.09                                  | 42.86 | 1.91 | T           | IN          |
| 5  | 4:2FTS        | 757124-72-4 | C(CS(=O)(=O)O)C(C(C(C(C(F)(F)F)(F)F)(F)F)(F)F                                | -7.5                                   | -7.35                                  | 37.50 | 2.17 | T           | IN          |
| 6  | 5:3FTCA       | 914637-49-3 | C(CC(C(C(C(C(F)(F)F)(F)F)(F)F)(F)F)C(=O)O                                    | -8                                     | -7.81                                  | 42.31 | 2.24 | T           | IN          |
| 7  | 6:2 Cl-PFESA  | 756426-58-1 | C(C(C(C(F)Cl)(F)F)(F)F)(C(C(OC(C(F)(F)S(=O)(=O)O)(F)F)(F)F)(F)F)(F)F         | -9.3                                   | -9.16                                  | 54.84 | 2.51 | T           | IN          |
| 8  | 6:2FTOH       | 647-42-7    | C(CO)C(C(C(C(C(C(F)(F)F)(F)F)(F)F)(F)F)(F)F                                  | -7.6                                   | -8.14                                  | 48.15 | 2.23 | T           | IN          |
| 9  | 6:2FTS        | 27619-97-2  | C(CS(=O)(=O)O)C(C(C(C(C(C(F)(F)F)(F)F)(F)F)(F)F)(F)F)(F)F                    | -8                                     | -8.32                                  | 43.33 | 2.44 | T           | IN          |
| 10 | 6:2FTUCA      | 70887-88-6  | C(=C(C(C(C(C(C(F)(F)F)(F)F)(F)F)(F)F)(F)F)C(=O)O                             | -7.7                                   | -8.29                                  | 50.00 | 2.24 | V           | IN          |
| 11 | 6:2PAPs       | 57678-01-0  | C(COP(=O)(O)O)C(C(C(C(C(C(F)(F)F)(F)F)(F)F)(F)F)(F)F)(F)F                    | -8.4                                   | -8.29                                  | 40.63 | 2.51 | T           | IN          |
| 12 | 8:2FTOH       | 678-39-7    | C(CO)C(C(C(C(C(C(C(C(F)(F)F)(F)F)(F)F)(F)F)(F)F)(F)F)(F)F                    | -8.8                                   | -8.95                                  | 51.52 | 2.50 | T           | IN          |
| 13 | 8:2FTS        | 39108-34-4  | C(CS(=O)(=O)O)C(C(C(C(C(C(C(C(F)(F)F)(F)F)(F)F)(F)F)(F)F)(F)F)(F)F           | -9.1                                   | -9.08                                  | 47.22 | 2.68 | T           | IN          |
| 14 | 8:2FTUCA      | 70887-84-2  | C(=C(C(C(C(C(C(C(C(C(F)(F)F)(F)F)(F)F)(F)F)(F)F)(F)F)C(=O)O                  | -9                                     | -9.09                                  | 53.33 | 2.51 | T           | IN          |
| 15 | EtFOSA        | 4151-50-2   | CCNS(=O)(=O)C(C(C(C(C(C(C(C(F)(F)F)(F)F)(F)F)(F)F)(F)F)(F)F)(F)F             | -8.9                                   | -9.00                                  | 45.95 | 2.68 | V           | IN          |
| 16 | EtFOSE        | 1691-99-2   | CCN(CCO)S(=O)(=O)C(C(C(C(C(C(C(C(F)(F)F)(F)F)(F)F)(F)F)(F)F)(F)F)(F)F        | -9.5                                   | -8.69                                  | 38.64 | 2.74 | T           | IN          |
| 17 | FOSA          | 754-91-6    | C(C(C(C(C(F)S(=O)(=O)N)(F)F)(F)F)(F)F)(C(C(C(C(F)(F)F)(F)F)(F)F)(F)F         | -9.2                                   | -9.03                                  | 54.84 | 2.44 | T           | IN          |
| 18 | MeFOSA        | 31506-32-8  | CNS(=O)(=O)C(C(C(C(C(C(C(C(F)(F)F)(F)F)(F)F)(F)F)(F)F)(F)F)(F)F              | -9                                     | -8.87                                  | 50.00 | 2.51 | V           | IN          |
| 19 | MeFOSE        | 24448-09-7  | CN(CCO)S(=O)(=O)C(C(C(C(C(C(C(C(F)(F)F)(F)F)(F)F)(F)F)(F)F)(F)F)(F)F         | -9                                     | -8.85                                  | 41.46 | 2.74 | T           | IN          |
| 20 | Mhopflica n=6 | -           | C(C(=O)O)OCC(C(C(C(C(C(F)(F)F)(F)F)(F)F)(F)F)(F)F)(F)F                       | -7.8                                   | -8.48                                  | 43.33 | 2.52 | T           | IN          |
| 21 | Mhopflica n=7 | -           | C(C(=O)O)OCC(C(C(C(C(C(C(C(F)(F)F)(F)F)(F)F)(F)F)(F)F)(F)F)(F)F              | -8.4                                   | -9.01                                  | 45.45 | 2.70 | T           | IN          |
| 22 | Mhopflica n=8 | -           | C(C(=O)O)OCC(C(C(C(C(C(C(C(C(F)(F)F)(F)F)(F)F)(F)F)(F)F)(F)F)(F)F            | -9                                     | -9.22                                  | 47.22 | 2.74 | T           | IN          |
| 23 | PFBA          | 375-22-4    | C(=O)(C(C(C(F)(F)F)(F)F)F)O                                                  | -6.1                                   | -6.55                                  | 50.00 | 1.46 | T           | IN          |
| 24 | PFBS          | 375-73-5    | C(C(C(F)S(=O)(=O)O)(F)F)(C(F)(F)F)(F)F                                       | -7.2                                   | -7.28                                  | 50.00 | 1.79 | T           | IN          |
| 25 | PFCHS         | 2106-55-0   | C1(C(C(C(C(C1(F)F)(F)F)S(=O)(=O)O)(F)F)(F)F)(F)F                             | -7.3                                   | -6.58                                  | 50.00 | 1.47 | T           | IN          |
| 26 | PFDA          | 335-76-2    | C(=O)(C(C(C(C(C(C(C(C(C(F)(F)F)(F)F)(F)F)(F)F)(F)F)(F)F)(F)F)F)O             | -9.9                                   | -9.46                                  | 59.38 | 2.51 | T           | IN          |
| 27 | PFETs         | 354-88-1    | C(C(F)F)S(=O)(=O)O)(F)F                                                      | -5.7                                   | -5.72                                  | 41.67 | 1.32 | T           | IN          |
| 28 | PFHpA         | 375-85-9    | C(=O)(C(C(C(C(C(C(F)(F)F)(F)F)(F)F)(F)F)(F)F)O                               | -8.2                                   | -8.50                                  | 56.52 | 2.16 | V           | IN          |
| 29 | PFHpS         | 375-92-8    | C(C(C(C(F)F)(F)F)(F)F)(C(C(C(F)F)S(=O)(=O)O)(F)F)(F)F)(F)F                   | -8.5                                   | -8.61                                  | 55.56 | 2.24 | T           | IN          |
| 30 | PFHxA         | 307-24-4    | C(=O)(C(C(C(C(C(F)F)(F)F)(F)F)(F)F)(F)F)O                                    | -7.3                                   | -7.83                                  | 55.00 | 1.90 | V           | IN          |
| 31 | PFHxPA        | 40143-76-8  | C(C(C(C(F)F)P(=O)(O)O)(F)F)(C(C(C(F)F)(F)F)(F)F                              | -7.9                                   | -8.21                                  | 52.00 | 2.15 | V           | IN          |
| 32 | PFHxS         | 355-46-4    | C(C(C(C(F)F)S(=O)(=O)O)(F)F)(F)F)(C(C(C(F)F)F)(F)F)(F)F                      | -7.9                                   | -8.34                                  | 54.17 | 2.15 | T           | IN          |
| 33 | PFNA          | 375-95-1    | C(=O)(C(C(C(C(C(C(C(C(C(F)(F)F)(F)F)(F)F)(F)F)(F)F)(F)F)(F)F)O               | -9.1                                   | -9.26                                  | 58.62 | 2.45 | V           | IN          |
| 34 | PFNS          | 68259-12-1  | C(C(C(C(C(F)F)(F)F)(F)F)(F)F)(C(C(C(C(F)F)S(=O)(=O)O)(F)F)(F)F)(F)F)(F)F     | -9.7                                   | -9.35                                  | 57.58 | 2.51 | T           | IN          |
| 35 | PFOA          | 335-67-1    | C(=O)(C(C(C(C(C(C(C(F)F)(F)F)(F)F)(F)F)(F)F)(F)F)O                           | -8.4                                   | -8.75                                  | 57.69 | 2.24 | V           | IN          |
| 36 | PFOPA         | 40143-78-0  | C(C(C(C(C(F)F)P(=O)(O)O)(F)F)(F)F)(C(C(C(F)F)(F)F)(F)F)(F)F                  | -9.1                                   | -9.03                                  | 54.84 | 2.44 | T           | IN          |
| 37 | PFOS          | 1763-23-1   | C(C(C(C(C(F)F)S(=O)(=O)O)(F)F)(F)F)(C(C(C(C(F)F)(F)F)(F)F)(F)F               | -9.2                                   | -9.14                                  | 56.67 | 2.44 | V           | IN          |
| 38 | PFPeA         | 2706-90-3   | C(=O)(C(C(C(C(F)F)(F)F)(F)F)(F)F)O                                           | -7.5                                   | -7.49                                  | 52.94 | 1.81 | V           | IN          |
| 39 | PFPeS         | 2706-91-4   | C(C(C(F)F)(F)F)(C(C(C(F)F)S(=O)(=O)O)(F)F)(F)F                               | -7.7                                   | -7.66                                  | 52.38 | 1.90 | T           | IN          |
| 40 | PFPPrA        | 422-64-0    | C(=O)(C(C(C(F)F)(F)F)O                                                       | -5.3                                   | -6.04                                  | 45.45 | 1.36 | V           | IN          |
| 41 | PFPPrS        | 110676-15-8 | C(C(F)F)(F)F)(C(F)F)S(=O)(=O)O)(F)F                                          | -6.2                                   | -6.31                                  | 46.67 | 1.45 | V           | IN          |
| 42 | PFUDA         | 2058-94-8   | C(=O)(C(C(C(C(C(C(C(C(C(C(F)F)(F)F)(F)F)(F)F)(F)F)(F)F)(F)F)(F)F)O           | -9.7                                   | -9.88                                  | 60.00 | 2.69 | T           | IN          |
| 43 | TFA           | 76-05-1     | C(=O)(C(F)F)F)O                                                              | -4.4                                   | -4.45                                  | 37.50 | 0.86 | T           | OUT         |



[illegible]

[illegible]



[illegible]

[illegible]

















|         |                                                                                       |             |                                                                                                        |        |       |      |   |     |
|---------|---------------------------------------------------------------------------------------|-------------|--------------------------------------------------------------------------------------------------------|--------|-------|------|---|-----|
|         | Bis(2,2,3,3,4,4,5,5,6,6,7,7-dodecafluoroheptyl)sulfosuccinate sodium salt             | 60131-27-3  | [Na+].[O-]S(=O)(=O)C(CC(=O)OC(F)F(C)F(F)C(F)F(C)F(C)F(C)=O)CC(F)F(C)F(C)F(C)F(C)F(C)F                  | -10.23 | 40.00 | 3.40 | P | OUT |
| QL00246 | Bis(1H,1H,6H-perfluorohexyl)-2-sulfobutanedioate sodium salt                          | 98151-22-5  | [Na+].[O-]S(=O)(=O)C(CC(=O)OC(F)F(C)F(F)C(F)F(C)F(C)F)C(=O)OCC(F)F(C)F(C)F(C)F(C)F(C)F                 | -9.74  | 37.04 | 3.26 | P | OUT |
| QL00247 | Sodium 1,4-bis(3,3,4,4,5,5,6,6,7,7,8,8-tridecafluorooctylsulphonatosuccinate)         | 54950-05-9  | [Na+].[O-]S(=O)(=O)C(CC(=O)OCCCC(F)F(C)F(F)C(F)F(C)F(C)F(C)F(C)=O)OCCC(F)F(C)F(C)F(C)F(C)F(C)F(C)F(C)F | -10.42 | 39.39 | 3.50 | P | OUT |
| QL00248 | Sodium perfluorodecanesulfonate                                                       | 2806-15-7   | [Na+].[O-]S(=O)(=O)C(F)F(C)F(F)C(F)F(C)F(F)C(F)F(C)F(F)C(F)F(C)F(F)C(F)F                               | -10.02 | 58.33 | 2.79 | P | OUT |
| QL00249 | Sodium Perfluorononanenesulfonate                                                     | 98789-57-2  | [Na+].[O-]S(=O)(=O)C(F)F(C)F(F)C(F)F(C)F(F)C(F)F(C)F(F)C(F)F(C)F(F)F                                   | -9.62  | 57.58 | 2.63 | P | IN  |
| QL00250 | Sodium perfluorooctanesulfonate                                                       | 4021-47-0   | [Na+].[O-]S(=O)(=O)C(F)F(C)F(F)C(F)F(C)F(F)C(F)F(C)F(F)C(F)F(C)F(F)F                                   | -9.43  | 56.67 | 2.57 | P | IN  |
| QL00251 | Sodium perfluorohexanesulfonate                                                       | 82382-12-5  | [Na+].[O-]S(=O)(=O)C(F)F(C)F(F)C(F)F(C)F(F)C(F)F(C)F(F)F                                               | -8.70  | 54.17 | 2.31 | P | IN  |
| QL00252 | Sodium nonafluorobutane-1-sulfonate                                                   | 60453-92-1  | [Na+].[O-]S(=O)(=O)C(F)F(C)F(F)C(F)F(C)F(F)F                                                           | -7.75  | 50.00 | 2.00 | P | IN  |
| QL00253 | Sodium 1,1,2,2-tetrafluoro-(1,1,2,2-pentafluoroethoxy)ethanesulfonate                 | 113507-87-2 | [Na+].[O-]S(=O)(=O)C(F)F(C)F(F)OC(F)F(C)F(F)F                                                          | -7.78  | 47.37 | 2.09 | P | IN  |
| QL00254 | Sodium 2â€¦[[perfluorooctyl(oxy)]benzeneâ€¦trisulfonate                               | 41674-07-1  | [Na+].[O-]S(=O)(=O)C1=C(C(OC(F)F(C)F(F)C(F)F(C)F(F)C(F)F(C)F(F)C(F)F(C)F(F))C=CC=C1                    | -9.07  | 41.46 | 2.84 | P | IN  |
| QL00255 | Heptadecafluorooctanesulfonamidobenzenesulfonic acid sodium salt                      | 172398-80-0 | [Na+].[O-]S(=O)(=O)C1=CC=C(NS(=O)(=O)C(F)F(C)F(F)C(F)F(C)F(F)C(F)F(C)F(F)C(F)F(C)F(F))C=C1             | -9.58  | 37.78 | 3.17 | P | IN  |
| QL00256 | Sodium 4-(perfluoro(2-methylpent-2-en-3-yloxy)benzene-1-sulfonate                     | 85284-17-9  | [Na+].[O-]S(=O)(=O)C1=CC=C(OC(=C(C(F)F)C(F)F(F)C(F)F(C)F(F)C(F)F)C=C1                                  | -7.49  | 33.33 | 2.35 | P | IN  |
| QL00257 | Sodium 4-(perfluoro(3,4-dimethylhex-3-en-2-yloxy))benzene-1-sulfonate                 | 94042-94-1  | [Na+].[O-]S(=O)(=O)C1=CC=C(OC(F)(C(=C(C(F)F)C(F)F(C)F(F)C(F)F(C)F(F)C(F)F)C=C1                         | -8.65  | 38.46 | 2.73 | P | IN  |
| QL00258 | Sodium 4-(((4E)-4,6-dimethylhept-4-en-3-yloxy)benzene-1-sulfonate                     | 85284-15-7  | [Na+].[O-]S(=O)(=O)C1=CC=C(OC(F)(C(=C(F)C(F)(C(F)F)C(F)F(C)F(F)C(F)F(C)F(F)C(F)F)C=C1                  | -8.62  | 40.48 | 2.66 | P | IN  |
| QL00259 | Sodium 4-perfluorononyloxym benzenesulpho nate                                        | 59536-17-3  | [Na+].[O-]S(=O)(=O)C1=CC=C(OC(F)F(C)F(F)C(F)F(C)F(C)F(C)F(C)F(C)F(C)F(C)F)C=C1                         | -9.91  | 43.18 | 3.17 | P | OUT |
| QL00260 | Sodium 4-(perfluoro-2-(butan-2-yl)-3-ethyl-3-methylpent-1-en-1-yloxy)benzenesulfonate | 94042-95-2  | [Na+].[O-]S(=O)(=O)C1=CC=C(OC(F)=C(C(F)(C(F)F)C(F)F(C)F(F)C(C(F)F)F)(C(F)F)C(F)F(C)F(F)C(F)F)C=C1      | -8.50  | 45.10 | 2.48 | P | IN  |
| QL00261 | Sodium 4-perflurohexenyloxybenzenesulfo nate                                          | 59493-84-4  | [Na+].[O-]S(=O)(=O)C1=CC=C(OC(F)=C(F)C(F)F(C)F(C)F(F)C(F)F)C=C1                                        | -8.63  | 33.33 | 2.86 | P | OUT |
| QL00262 | Sodium 1-{[2,2,3,3,4,4,5,5,6,6,7,7-dodecafluoroheptyl]-2-sulphonatobenzoate           | 29811-19-6  | [Na+].[O-]S(=O)(=O)C1=CC=CC=C1C(=O)OCC(F)F(C)F(F)C(F)F(C)F(F)C(F)F(C)F                                 | -8.41  | 30.00 | 2.86 | P | OUT |
| QL00263 | Sodium [[[(hepta-decafluorooctyl)sulphony l]amino)methyl]benzenesulphonate            | 51032-47-4  | [Na+].[O-]S(=O)(=O)c1cccc1NS(=O)(=O)C(F)F(C)F(F)C(F)F(C)F(F)C(F)F(C)F(F)C(F)F                          | -9.11  | 35.42 | 3.02 | P | IN  |
| QL00264 | Sodium [[[(tridecafluorohexyl)sulfonyl]ami no[methyl]benzenesulphonate                | 68299-21-8  | [Na+].[O-]S(=O)(=O)c1ccccc1NS(=O)(=O)C(F)F(C)F(F)C(F)F(C)F(F)C(F)F(C)F(F)F                             | -8.42  | 30.95 | 2.84 | P | OUT |
| QL00265 |                                                                                       |             |                                                                                                        |        |       |      |   |     |



|         |                                                                                      |              |                                                                                                 |        |       |      |   |     |
|---------|--------------------------------------------------------------------------------------|--------------|-------------------------------------------------------------------------------------------------|--------|-------|------|---|-----|
| QL00266 | Sodium<br>[[[(undecafluoropentyl)sulphonyl]<br>amino]methyl]benzenesulphonate        | 68299-20-7   | [Na+].[O-]S(=O)(=O)c1ccccc1CNS(=O)(=O)C(F)(F)C(F)(F)C(F)(F)C(F)(F)C(F)(F)F                      | -8.15  | 28.21 | 2.79 | P | OUT |
| QL00267 | Sodium 3,3,4,4,5,5,6,6,7,7,8,8,8-tridecafluorooctane-1-sulfonate                     | 27619-94-9   | [Na+].[O-]S(=O)(=O)CCCC(F)(F)C(F)(F)C(F)(F)C(F)(F)C(F)(F)C(F)(F)F                               | -8.63  | 43.33 | 2.58 | P | IN  |
| QL00268 | Sodium 5,5,6,6,7,7,8,8,8-nonafluorooctane-1-sulfonate                                | 65345-91-7   | [Na+].[O-]S(=O)(=O)CCCC(F)(F)C(F)(F)C(F)(F)C(F)(F)F                                             | -7.78  | 30.00 | 2.57 | P | OUT |
| QL00269 | 1,3-Bis[(6H-perfluorohexyl)methoxy]-2-propanol hydrogen sulfate sodium               | 61119-62-8   | [Na+].[O-]S(=O)OC(COCC(F)(F)C(F)(F)C(F)(F)C(F)(F)C(F)(F)COCC(F)(F)C(F)(F)C(F)(F)C(F)(F)C(F)(F)F | -10.23 | 40.00 | 3.40 | P | OUT |
| QL00270 | Sodium 2-(((perfluorohexyl)ethyloxy)carbon<br>ylamino)ethylsulfanylsulfonate         | 82199-07-3   | [Na+].[O-]S(=O)(=O)SCCNC(=O)OCCC(F)(F)C(F)(F)C(F)(F)C(F)(F)C(F)(F)C(F)(F)F                      | -9.08  | 30.95 | 3.13 | P | OUT |
| QL00271 | Sodium<br>heptadecafluorooctanesulphinate                                            | 68555-67-9   | [Na+].[O-]S(=O)C(F)(F)C(F)(F)C(F)(F)C(F)(F)C(F)(F)C(F)(F)C(F)(F)C(F)(F)F                        | -9.56  | 58.62 | 2.58 | P | IN  |
| QL00272 | Sodium<br>1,1,2,2,3,3,4,4,5,5,6,6,7,7-pentadecafluoroheptane-1-sulphinate            | 68555-66-8   | [Na+].[O-]S(=O)C(F)(F)C(F)(F)C(F)(F)C(F)(F)C(F)(F)C(F)(F)C(F)(F)C(F)(F)F                        | -9.08  | 57.69 | 2.39 | P | IN  |
| QL00273 | Sodium undecafluoropentane-1-sulfinate                                               | 1997344-07-6 | [Na+].[O-]S(=O)C(F)(F)C(F)(F)C(F)(F)C(F)(F)C(F)(F)F                                             | -8.25  | 55.00 | 2.09 | P | IN  |
| QL00274 | Sodium 1,1,2,2,3,3,4,4,4-nonafluoro1-butanesulfinate                                 | 102061-82-5  | [Na+].[O-]S(=O)C(F)(F)C(F)(F)C(F)(F)C(F)(F)F                                                    | -7.97  | 52.94 | 2.02 | P | IN  |
| QL00275 | Lodyne S 103A                                                                        | 62880-93-7   | [Na+].CC(C)(CS([O-])(=O)=O)NC(=O)CCSCCC(F)(F)C(F)(F)C(F)(F)C(F)(F)C(F)(F)C(F)(F)F               | -8.73  | 24.53 | 3.15 | P | OUT |
| QL00276 | 1-(Perfluorooctyl)nonanol sulfate sodium                                             | 799267-73-5  | [Na+].CCCCCCCCC(OS([O-])(=O)=O)C(F)(F)C(F)(F)C(F)(F)C(F)(F)C(F)(F)C(F)(F)C(F)(F)C(F)(F)F        | -9.13  | 29.31 | 3.20 | P | OUT |
| QL00277 | (1H,1H,7H-perfluoroheptyl)-2-sulfohexadecanoate sodium salt                          | 75032-94-9   | [Na+].CCCCCCCCCCCCC(C(=O)OCC(F)(F)C(F)(F)C(F)(F)C(F)(F)C(F)(F)C(F)(F)S([O-])(=O)=O              | -9.32  | 16.00 | 3.65 | P | OUT |
| QL00278 | N-Ethyl-N-(perfluoro-1-oxoheptyl)-glycine sodium salt                                | 116537-74-7  | [Na+].CCN(CC([O-])=O)C(=O)C(F)(F)C(F)(F)C(F)(F)C(F)(F)C(F)(F)C(F)(F)F                           | -8.34  | 36.11 | 2.65 | P | IN  |
| QL00279 | Sodium N-ethyl-N-((heptadecafluorooctyl)sulphonyl)glycinate                          | 3871-50-9    | [Na+].CCN(CC(=O)[O-])S(=O)(=O)C(F)(F)C(F)(F)C(F)(F)C(F)(F)C(F)(F)C(F)(F)C(F)(F)F                | -8.99  | 39.53 | 2.85 | P | IN  |
| QL00280 | Sodium N-ethyl-N-((pentadecafluoroheptyl)sulphonyl)glycinate                         | 68555-71-5   | [Na+].CCN(CC(=O)[O-])S(=O)(=O)C(F)(F)C(F)(F)C(F)(F)C(F)(F)C(F)(F)C(F)(F)C(F)(F)F                | -8.76  | 37.50 | 2.81 | P | IN  |
| QL00281 | Sodium N-ethyl-N-((tridecafluorohexyl)sulphonyl)glycinate                            | 68555-70-4   | [Na+].CCN(CC(=O)[O-])S(=O)(=O)C(F)(F)C(F)(F)C(F)(F)C(F)(F)C(F)(F)C(F)(F)F                       | -8.26  | 35.14 | 2.65 | P | IN  |
| QL00282 | Sodium N-ethyl-N-((undecafluoropentyl)sulphonyl)glycinate                            | 68555-69-1   | [Na+].CCN(CC(=O)[O-])S(=O)(=O)C(F)(F)C(F)(F)C(F)(F)C(F)(F)C(F)(F)C(F)(F)F                       | -7.97  | 32.35 | 2.59 | P | IN  |
| QL00283 | Sodium N-ethyl-N-((nonafluorobutyl)sulphonyl)glycinate                               | 68555-68-0   | [Na+].CCN(CC(=O)[O-])S(=O)(=O)C(F)(F)C(F)(F)C(F)(F)C(F)(F)F                                     | -7.35  | 29.03 | 2.40 | P | OUT |
| QL00284 | 3-[Ethyl(perfluoro-1-oxooctyl)amino]-1-propanesulfonic acid sodium salt              | 89685-61-0   | [Na+].CCN(CCCS([O-])(=O)=O)C(=O)C(F)(F)C(F)(F)C(F)(F)C(F)(F)C(F)(F)C(F)(F)F                     | -8.90  | 32.61 | 3.01 | P | OUT |
| QL00285 | 1-Propanesulfonic acid, 3-[ethyl((heptadecafluorooctyl)sulfonyl)amino]-, sodium salt | 75032-81-4   | [Na+].CCN(CCCS([O-])(=O)=O)S(=O)(=O)C(F)(F)C(F)(F)C(F)(F)C(F)(F)C(F)(F)C(F)(F)C(F)(F)F          | -9.05  | 34.00 | 3.04 | P | OUT |





|         |                                                                                                                                                                      |            |                                                                                                                           |
|---------|----------------------------------------------------------------------------------------------------------------------------------------------------------------------|------------|---------------------------------------------------------------------------------------------------------------------------|
| QL00312 | Diammonium 2-[ethyl[(pentadecafluoroheptyl)sulphonyl]amino]ethyl phosphate                                                                                           | 67939-98-4 | [NH4+].[NH4+].CCN(CCOP(=O)([O-])[O-])S(=O)(=O)C(F)(F)C(F)(F)C(F)(F)C(F)(F)C(F)(F)C(F)(F)F                                 |
| QL00313 | Diammonium 4,4,5,5,6,6,7,7,8,8,9,9,10,11,11,11-hexadecafluoro-2-hydroxy-10-(trifluoromethyl)undecyl phosphate                                                        | 63295-18-1 | [NH4+].[NH4+].OC(COP(=O)([O-])[O-])CC(F)(F)C(F)(F)C(F)(F)C(F)(F)C(F)(F)C(F)(F)C(F)(F)C(F)(F)F                             |
| QL00314 | Diammonium 4,4,5,5,6,6,7,7,8,8,9,9,10,10,11,11,12,13,13,13-icosafuoro-2-hydroxy-12-(trifluoromethyl)tridecyl phosphate                                               | 94200-50-7 | [NH4+].[NH4+].OC(COP(=O)([O-])[O-])CC(F)(F)C(F)(F)C(F)(F)C(F)(F)C(F)(F)C(F)(F)C(F)(F)C(F)(F)C(F)(F)F                      |
| QL00315 | Diammonium 4,4,5,5,6,6,7,7,8,8,9,9,10,10,11,11,12,12,13,13,14,15,15,15-tetracosafuoro-2-hydroxy-14-(trifluoromethyl)pentadecyl phosphate                             | 94200-51-8 | [NH4+].[NH4+].OC(COP(=O)([O-])[O-])CC(F)(F)C(F)(F)C(F)(F)C(F)(F)C(F)(F)C(F)(F)C(F)(F)C(F)(F)C(F)(F)C(F)(F)F               |
| QL00316 | Diammonium 4,4,5,5,6,6,7,7,8,8,9,9,10,10,11,11,12,12,13,13,14,14,15,15,16,17,17,17-octacosafuoro-2-hydroxy-16-(trifluoromethyl)heptadecyl phosphate                  | 94200-52-9 | [NH4+].[NH4+].OC(COP(=O)([O-])[O-])CC(F)(F)C(F)(F)C(F)(F)C(F)(F)C(F)(F)C(F)(F)C(F)(F)C(F)(F)C(F)(F)C(F)(F)C(F)(F)F        |
| QL00317 | Diammonium 4,4,5,5,6,6,7,7,8,8,9,9,10,10,11,11,12,12,13,13,14,14,15,15,16,16,17,17,18,18,19,19,19-dotriacontafuoro-2-hydroxy-18-(trifluoromethyl)nonadecyl phosphate | 94200-53-0 | [NH4+].[NH4+].OC(COP(=O)([O-])[O-])CC(F)(F)C(F)(F)C(F)(F)C(F)(F)C(F)(F)C(F)(F)C(F)(F)C(F)(F)C(F)(F)C(F)(F)C(F)(F)C(F)(F)F |
| QL00318 | Diammonium 4,4,5,5,6,6,7,7,8,8,9,9,10,10,11,11,12,12,13,13,14,14,15,15,16,16,17,17,18,18,19,19,19-tritriacontafuoro-2-hydroxynonadecyl phosphate                     | 94200-49-4 | [NH4+].[NH4+].OC(COP(=O)([O-])[O-])CC(F)(F)C(F)(F)C(F)(F)C(F)(F)C(F)(F)C(F)(F)C(F)(F)C(F)(F)C(F)(F)C(F)(F)C(F)(F)C(F)(F)F |
| QL00319 | Diammonium 4,4,5,5,6,6,7,7,8,8,9,9,10,10,11,11,12,12,13,13,14,14,15,15,16,16,17,17,17-nonacosafuoro-2-hydroxyheptadecyl phosphate                                    | 94200-48-3 | [NH4+].[NH4+].OC(COP(=O)([O-])[O-])CC(F)(F)C(F)(F)C(F)(F)C(F)(F)C(F)(F)C(F)(F)C(F)(F)C(F)(F)C(F)(F)C(F)(F)C(F)(F)F        |
| QL00320 | Diammonium 4,4,5,5,6,6,7,7,8,8,9,9,10,10,11,11,12,12,13,13,14,14,15,15,15-pentacosafuoro-2-hydroxypentadecyl phosphate                                               | 94200-47-2 | [NH4+].[NH4+].OC(COP(=O)([O-])[O-])CC(F)(F)C(F)(F)C(F)(F)C(F)(F)C(F)(F)C(F)(F)C(F)(F)C(F)(F)C(F)(F)C(F)(F)F               |
| QL00321 | Diammonium 4,4,5,5,6,6,7,7,8,8,9,9,10,10,11,11,12,12,13,13,13-henicosafuoro-2-hydroxytridecyl phosphate                                                              | 94200-46-1 | [NH4+].[NH4+].OC(COP(=O)([O-])[O-])CC(F)(F)C(F)(F)C(F)(F)C(F)(F)C(F)(F)C(F)(F)C(F)(F)C(F)(F)C(F)(F)C(F)(F)F               |
| QL00322 | Diammonium 4,4,5,5,6,6,7,7,8,8,9,9,10,10,11,11,11-heptadecafluoro-2-hydroxyundecyl phosphate                                                                         | 94200-45-0 | [NH4+].[NH4+].OC(COP(=O)([O-])[O-])CC(F)(F)C(F)(F)C(F)(F)C(F)(F)C(F)(F)C(F)(F)C(F)(F)C(F)(F)F                             |
| QL00323 | Ammonium 2,3,3,4,4,5,5,6,6,6-decafluoro-2-(pentafluoroethyl)hexanoate                                                                                                | 13058-06-5 | [NH4+].[O-]C(=O)C(F)(F)C(F)(F)C(F)(F)C(F)(F)C(F)(F)C(F)(F)C(F)(F)F                                                        |

|        |       |      |   |     |
|--------|-------|------|---|-----|
| -8.68  | 27.78 | 3.04 | P | OUT |
| -9.06  | 35.85 | 2.99 | P | IN  |
| -9.63  | 38.98 | 3.15 | P | IN  |
| -10.12 | 41.54 | 3.31 | P | OUT |
| -10.56 | 43.66 | 3.44 | P | OUT |
| -10.95 | 45.45 | 3.57 | P | OUT |
| -10.95 | 44.59 | 3.60 | P | OUT |
| -10.56 | 42.65 | 3.47 | P | OUT |
| -10.13 | 40.32 | 3.34 | P | OUT |
| -9.63  | 37.50 | 3.20 | P | OUT |
| -9.07  | 34.00 | 3.04 | P | OUT |
| -8.36  | 50.00 | 2.28 | P | IN  |





|         |                                                                                                                 |             |                                                                                                                                          |        |       |      |   |     |
|---------|-----------------------------------------------------------------------------------------------------------------|-------------|------------------------------------------------------------------------------------------------------------------------------------------|--------|-------|------|---|-----|
| QL00358 | Ammonium 1,1,2,2,3,3,4,4,4-nonafluorobutane-1-sulphonate                                                        | 68259-10-9  | [NH4+].[O-]S(=O)(=O)C(F)(F)C(F)(F)C(F)(F)C(F)(F)F                                                                                        | -7.19  | 40.91 | 2.00 | P | IN  |
| QL00359 | Ammonium 1,1,2,2-tetrafluoro-2-({1,1,1,2,3,3-hexafluoro-3-(pentafluoroethoxy)propan-2-yl}oxy)ethane-1-sulfonate | 93644-65-6  | [NH4+].[O-]S(=O)(=O)C(F)(F)C(F)(F)OC(F)(F)C(F)(F)C(F)(F)OC(F)(F)C(F)(F)F                                                                 | -8.70  | 45.45 | 2.56 | P | IN  |
| QL00360 | 82 Fluorotelomer sulfonate ammonium salt                                                                        | 149724-40-3 | [NH4+].[O-]S(=O)(=O)CCC(F)(F)C(F)(F)C(F)(F)C(F)(F)C(F)(F)C(F)(F)C(F)(F)C(F)(F)F                                                          | -9.05  | 42.50 | 2.80 | P | IN  |
| QL00361 | 62 Fluorotelomer sulphonate ammonium                                                                            | 59587-39-2  | [NH4+].[O-]S(=O)(=O)CCC(F)(F)C(F)(F)C(F)(F)C(F)(F)C(F)(F)C(F)(F)F                                                                        | -8.31  | 38.24 | 2.58 | P | IN  |
| QL00362 | 4-(Nonafluorobutoxy)butanesulfonic acid ammonium salt                                                           | 484023-69-0 | [NH4+].[O-]S(=O)(=O)CCCCOC(F)(F)C(F)(F)C(F)(F)C(F)(F)F                                                                                   | -7.65  | 25.71 | 2.63 | P | OUT |
| QL00363 | 1H,1H,2H,2H-Perfluorotetradecanol sulfate ammonium salt                                                         | 63225-59-2  | [NH4+].[O-]S(=O)(=O)OCCCC(F)(F)C(F)(F)C(F)(F)C(F)(F)C(F)(F)C(F)(F)C(F)(F)C(F)(F)C(F)(F)C(F)(F)F                                          | -10.21 | 47.17 | 3.19 | P | OUT |
| QL00364 | 1H,1H,2H,2H-Perfluorododecanol sulfate ammonium salt                                                            | 63225-58-1  | [NH4+].[O-]S(=O)(=O)OCCCC(F)(F)C(F)(F)C(F)(F)C(F)(F)C(F)(F)C(F)(F)C(F)(F)C(F)(F)C(F)(F)F                                                 | -9.70  | 44.68 | 3.03 | P | IN  |
| QL00365 | 1H,1H,2H,2H-Perfluorodecanol sulfate ammonium salt                                                              | 63225-57-0  | [NH4+].[O-]S(=O)(=O)OCCCC(F)(F)C(F)(F)C(F)(F)C(F)(F)C(F)(F)C(F)(F)C(F)(F)C(F)(F)F                                                        | -9.10  | 41.46 | 2.85 | P | IN  |
| QL00366 | 1H,1H,2H,2H-Perfluorooctanol sulfate ammonium salt                                                              | 63225-56-9  | [NH4+].[O-]S(=O)(=O)OCCCC(F)(F)C(F)(F)C(F)(F)C(F)(F)C(F)(F)C(F)(F)C(F)(F)F                                                               | -8.38  | 37.14 | 2.64 | P | IN  |
| QL00367 | Ammonium N-ethyl-N-[(heptadecafluorooctyl)sulphonyl]glycinate                                                   | 2991-52-8   | [NH4+].CCN(CC(=O)[O-])S(=O)(=O)C(F)(F)C(F)(F)C(F)(F)C(F)(F)C(F)(F)C(F)(F)C(F)(F)C(F)(F)F                                                 | -8.79  | 36.17 | 2.85 | P | IN  |
| QL00368 | 2-Hydroxy-3-[ethyl[(nonafluorobutyl)sulfonyl]amino]propanesulfonic acid monoammonium salt                       | 484023-83-8 | [NH4+].CCN(CC(O)CS([O-])(=O)=O)S(=O)(=O)C(F)(F)C(F)(F)C(F)(F)C(F)(F)F                                                                    | -7.40  | 20.93 | 2.65 | P | OUT |
| QL00369 | Ammonium bis[2-[ethyl[(pentadecafluoroheptyl)sulphonyl]amino]ethyl] phosphate                                   | 67939-97-3  | [NH4+].CCN(CCOP(=O)([O-])OCCN(CC)S(=O)(=O)C(F)(F)C(F)(F)C(F)(F)C(F)(F)C(F)(F)C(F)(F)C(F)(F)S(=O)(=O)C(F)(F)C(F)(F)C(F)(F)C(F)(F)C(F)(F)F | -10.54 | 34.09 | 3.70 | P | OUT |
| QL00370 | Ammonium N,N-bis(perfluorobutanesulfonyl)amide                                                                  | 129318-48-5 | [NH4+].FC(F)(F)C(F)(F)C(F)(F)C(F)(F)S(=O)(=O)[N-]S(=O)(=O)C(F)(F)C(F)(F)C(F)(F)C(F)(F)F                                                  | -9.24  | 47.37 | 2.75 | P | IN  |
| QL00371 | 2-Hydroxy-3-[(2-hydroxyethyl)][(nonafluorobutyl)sulfonyl]amino]propanesulfonic acid monoammonium salt           | 484023-82-7 | [NH4+].OCCN(CC(O)CS([O-])(=O)=O)S(=O)(=O)C(F)(F)C(F)(F)C(F)(F)C(F)(F)F                                                                   | -7.35  | 20.45 | 2.64 | P | OUT |
| QL00372 | 3,3,4,4,5,5,6,6,6-nonafluoro-1-nitrohex-1-ene                                                                   | 306935-66-0 | [O-][N+](=O)C=CC(F)(F)C(F)(F)C(F)(F)C(F)(F)F                                                                                             | -7.86  | 45.00 | 2.19 | P | IN  |
| QL00373 | 1H,2H,2H-perfluorooctanal (2,4-dinitrophenyl)hydrazone                                                          | 128917-19-1 | [O-][N+](=O)C1=CC(=C(NN=CCC(F)(F)C(F)(F)C(F)(F)C(F)(F)C(F)(F)C(F)(F)C=C1)[N+](=[O-])=O                                                   | -8.81  | 30.95 | 3.01 | P | OUT |
| QL00374 | 1-(1,1,1,2,3,3,3-Heptafluoropropan-2-yl)-3,5-dinitrobenzene                                                     | 24813-57-8  | [O-][N+](=O)C1=CC(=CC(=C1)[N+](=[O-])=O)C(F)(F)C(F)(F)C(F)(F)F                                                                           | -5.76  | 28.00 | 1.72 | P | OUT |
| QL00375 | Butanamide, N-(2-bromo-4-nitrophenyl)-2,2,3,3,4,4,4-heptafluoro-                                                | 111189-67-4 | [O-][N+](=O)C1=CC(Br)=C(NC(=O)C(F)(F)C(F)(F)C(F)(F)C(F)(F)C=C1                                                                           | -7.65  | 29.63 | 2.52 | P | OUT |
| QL00376 | 3-Nitrophenyl heptafluorobutanoate                                                                              | 52512-15-9  | [O-][N+](=O)C1=CC(OC(=O)C(F)(F)C(F)(F)C(F)(F)F)=CC=C1                                                                                    | -7.25  | 26.92 | 2.42 | P | OUT |
| QL00377 | N-(4-Nitrophenyl)perfluorobutanamide                                                                            | 3869-06-5   | [O-][N+](=O)C1=CC=C(NC(=O)C(F)(F)C(F)(F)C(F)(F)F)C=C1                                                                                    | -7.44  | 25.93 | 2.53 | P | OUT |
| QL00378 | 4-Nitrophenyl heptafluorobutanoate                                                                              | 1799-92-4   | [O-][N+](=O)C1=CC=C(OC(=O)C(F)(F)C(F)(F)C(F)(F)F)C=C1                                                                                    | -7.50  | 26.92 | 2.53 | P | OUT |
| QL00379 | 6-Nitro-2-(pentafluoroethyl)-1H-benzimidazole                                                                   | 4229-01-0   | [O-][N+](=O)C1=CC2=C(C=C1)N=C(N2)C(F)(F)C(F)(F)F                                                                                         | -6.65  | 21.74 | 2.29 | P | OUT |

|         |                                                                                            |              |                                                                                                                                                            |
|---------|--------------------------------------------------------------------------------------------|--------------|------------------------------------------------------------------------------------------------------------------------------------------------------------|
| QL00380 | 1,2,4-Trifluoro-3,5-bis(1,1,1,2,3,3,3-heptafluoropropan-2-yl)-6-nitrobenzene               | 20017-51-0   | [O-][N+](=O)c1c(F)c(F)c(F)c1C(F)(C(F)(F)F)C(F)(F)F)C(F)(C(F)(F)F)C(F)(F)F                                                                                  |
| QL00381 | 1,2,4,5-Tetrafluoro-3-(1,1,1,2,3,3,3-heptafluoropropan-2-yl)-6-nitrobenzene                | 20017-50-9   | [O-][N+](=O)c1c(F)c(F)c(F)c1F)C(F)(C(F)(F)F)C(F)(F)F                                                                                                       |
| QL00382 | 1,4-Dichloro-2-(1,1,2,3,3,3-hexafluoropropoxy)-5-nitrobenzene                              | 130841-23-5  | [O-][N+](=O)c1cc(Cl)c(OC(F)(F)C(F)(F)F)C(F)(F)cc1Cl                                                                                                        |
| QL00383 | 2,2,3,3,4,4,5,5-Nonafluoropentyl 2,5,7-trinitro-9-oxo-9H-fluorene-4-carboxylate            | 253605-71-9  | [O-][N+](=O)c1cc2C(=O)c3cc(cc(c3-c2c(c1)C(=O)OCC(F)(F)C(F)(F)C(F)(F)F)[N+](O-)=O)[N+](O-)=O                                                                |
| QL00384 | 2,2,3,3,4,4,4-Heptafluoro-1-(4-nitrophenyl)butan-1-one                                     | 144459-62-1  | [O-][N+](=O)c1ccc(cc1)C(=O)C(F)(F)C(F)(F)C(F)(F)F                                                                                                          |
| QL00385 | 1-(1,1,1,2,3,3,3-Heptafluoropropan-2-yl)-4-nitrobenzene                                    | 2396-14-7    | [O-][N+](=O)c1ccc(cc1)C(F)(C(F)(F)F)C(F)(F)F                                                                                                               |
| QL00386 | 1-Nitro-4-(nonafluorobutyl)benzene                                                         | 196932-95-3  | [O-][N+](=O)c1ccc(cc1)C(F)(F)C(F)(F)C(F)(F)C(F)(F)F                                                                                                        |
| QL00387 | 1-(Heptafluoropropyl)-4-nitrobenzene                                                       | 1300746-85-3 | [O-][N+](=O)c1ccc(cc1)C(F)(F)C(F)(F)C(F)(F)F                                                                                                               |
| QL00388 | 2,2,3,3,4,4,5,5,6,6,7,7,8,8,9,9-Heptadecafluoro-N-(4-nitrophenyl)nonanamide                | 164796-46-7  | [O-][N+](=O)c1ccc(NC(=O)C(F)(F)C(F)(F)C(F)(F)C(F)(F)C(F)(F)C(F)(F)C(F)(F)F)cc1                                                                             |
| QL00389 | 2,2,3,3,4,4,5,5,6,6,7,7-Tridecafluoro-N-(4-nitrophenyl)heptanamide                         | 164796-44-5  | [O-][N+](=O)c1ccc(NC(=O)C(F)(F)C(F)(F)C(F)(F)C(F)(F)C(F)(F)C(F)(F)F)cc1                                                                                    |
| QL00390 | 2,2,3,3,4,4,5,5-Nonafluoro-N-(4-nitrophenyl)pentanamide                                    | 150333-62-3  | [O-][N+](=O)c1ccc(NC(=O)C(F)(F)C(F)(F)C(F)(F)C(F)(F)F)cc1                                                                                                  |
| QL00391 | N-(2,4-Dinitrophenyl)-2,3,3,3-tetrafluoro-2-(heptafluoropropoxy)propanamide                | 105936-30-9  | [O-][N+](=O)c1ccc(NC(=O)C(F)(OC(F)(F)C(F)(F)C(F)(F)C(F)(F)F)c(c1)[N+](O-)=O                                                                                |
| QL00392 | 1-Nitro-4-({2,2,3,3,4,4,5,5,6,6,6-undecafluorohexyl)oxy}benzene                            | 183997-46-8  | [O-][N+](=O)c1ccc(OCC(F)(F)C(F)(F)C(F)(F)C(F)(F)C(F)(F)F)cc1                                                                                               |
| QL00393 | 1-(2,2,3,3,4,4,4-Heptafluorobutoxy)-4-nitrobenzene                                         | 109230-68-4  | [O-][N+](=O)c1ccc(OCC(F)(F)C(F)(F)C(F)(F)F)cc1                                                                                                             |
| QL00394 | 2-(Heptafluoropropyl)-6-nitro-1H-benzimidazole                                             | 6826-38-6    | [O-][N+](=O)c1ccc2nc(Nc2c1)C(F)(F)C(F)(F)C(F)(F)F                                                                                                          |
| QL00395 | 1-Nitro-3-(undecafluorooctyl)benzene                                                       | 1463530-16-6 | [O-][N+](=O)c1cccc(c1)C(F)(F)C(F)(F)C(F)(F)C(F)(F)C(F)(F)F                                                                                                 |
| QL00396 | 1-Nitro-3-(nonafluorobutyl)benzene                                                         | 2398-76-7    | [O-][N+](=O)c1cccc(c1)C(F)(F)C(F)(F)C(F)(F)C(F)(F)F                                                                                                        |
| QL00397 | 1,1,1,2,2,3,3-heptafluoro-5-nitro-4-(nitromethyl)pentane                                   | 355-91-9     | [O-][N+](=O)CC(C[N+](O-)=O)C(F)(F)C(F)(F)C(F)(F)F                                                                                                          |
| QL00398 | 3,3,4,4,5,5,6,6-Nonafluorohexyl nitrate                                                    | 34839-44-6   | [O-][N+](=O)OCCC(F)(F)C(F)(F)C(F)(F)C(F)(F)F                                                                                                               |
| QL00399 | Perfluorooctanoate ion(1-)                                                                 | 45285-51-6   | [O-]C(=O)C(F)(F)C(F)(F)C(F)(F)C(F)(F)C(F)(F)C(F)(F)C(F)(F)F                                                                                                |
| QL00400 | Perfluoroheptanoate                                                                        | 120885-29-2  | [O-]C(=O)C(F)(F)C(F)(F)C(F)(F)C(F)(F)C(F)(F)F                                                                                                              |
| QL00401 | 1-Propanaminium, 3-[[[heptadecafluorooctyl)sulfonyl]amino]-N,N,N-trimethyl-, sulfate (2:1) | 70225-26-2   | [O-]S([O-])(=O)=O.O.[N+](C)(C)CCCNS(=O)(=O)C(F)(F)C(F)(F)C(F)(F)C(F)(F)C(F)(F)C(F)(F)C(F)(F)F.NS(=O)(=O)C(F)(F)C(F)(F)C(F)(F)C(F)(F)C(F)(F)C(F)(F)C(F)(F)F |
| QL00402 | Perfluorooctanesulfonate                                                                   | 45298-90-6   | [O-]S(=O)(=O)C(F)(F)C(F)(F)C(F)(F)C(F)(F)C(F)(F)C(F)(F)C(F)(F)F                                                                                            |
| QL00403 | Perfluorohexanesulfonate                                                                   | 108427-53-8  | [O-]S(=O)(=O)C(F)(F)C(F)(F)C(F)(F)C(F)(F)C(F)(F)F                                                                                                          |

|       |       |      |   |     |
|-------|-------|------|---|-----|
| -7.87 | 53.13 | 1.97 | P | IN  |
| -8.04 | 47.83 | 2.19 | P | IN  |
| -7.72 | 33.33 | 2.45 | P | IN  |
| -7.85 | 19.57 | 2.89 | P | OUT |
| -7.43 | 28.00 | 2.47 | P | OUT |
| -6.76 | 30.43 | 2.10 | P | IN  |
| -7.82 | 34.62 | 2.46 | P | IN  |
| -7.19 | 30.43 | 2.29 | P | IN  |
| -9.57 | 40.48 | 3.09 | P | IN  |
| -8.89 | 36.11 | 2.90 | P | IN  |
| -8.01 | 30.00 | 2.68 | P | OUT |
| -8.13 | 30.56 | 2.71 | P | OUT |
| -8.32 | 33.33 | 2.72 | P | IN  |
| -7.43 | 25.93 | 2.53 | P | OUT |
| -7.34 | 26.92 | 2.46 | P | OUT |
| -8.03 | 37.93 | 2.47 | P | IN  |
| -7.37 | 34.62 | 2.26 | P | IN  |
| -6.20 | 29.17 | 1.89 | P | IN  |
| -7.67 | 39.13 | 2.27 | P | IN  |
| -8.89 | 60.00 | 2.24 | P | IN  |
| -8.66 | 59.09 | 2.16 | P | IN  |
| -9.10 | 31.19 | 3.14 | P | OUT |
| -9.26 | 58.62 | 2.44 | P | IN  |
| -8.49 | 56.52 | 2.15 | P | IN  |





[illegible]

[illegible]







[illegible]













|         |                                                                                                      |            |                                                                                                      |        |       |      |   |     |
|---------|------------------------------------------------------------------------------------------------------|------------|------------------------------------------------------------------------------------------------------|--------|-------|------|---|-----|
| QL00680 | (2-Carboxyethyl)-3-(((perfluoro-7-methyloctyl)2-hydroxypropyl)amino)propyldimethylammonium hydroxide | 73353-25-0 | C(NCCCN[+](CCC(O)=O)(C)C)C(O)CC(F)(F)C(F)(F)C(F)(F)C(F)(F)C(F)(F)C(F)(F)C(F)(F)C(F)(F)C(F)(F)F.[OH-] | -9.43  | 27.14 | 3.40 | P | OUT |
| QL00681 | perfluoroalkylamido ammonium, n=14                                                                   |            | C(NCCCN(C)C)(=O)C(F)(F)C(F)(F)C(F)(F)C(F)(F)C(F)(F)C(F)(F)C(F)(F)C(F)(F)C(F)(F)C(F)(F)F              | -10.53 | 44.62 | 3.41 | P | OUT |
| QL00682 | perfluoroalkylamido ammonium, n=12                                                                   |            | C(NCCCN(C)C)(=O)C(F)(F)C(F)(F)C(F)(F)C(F)(F)C(F)(F)C(F)(F)C(F)(F)C(F)(F)C(F)(F)F                     | -10.09 | 42.37 | 3.27 | P | OUT |
| QL00683 | perfluoroalkylamido ammonium, n=11                                                                   |            | C(NCCCN(C)C)(=O)C(F)(F)C(F)(F)C(F)(F)C(F)(F)C(F)(F)C(F)(F)C(F)(F)C(F)(F)F                            | -9.93  | 41.07 | 3.23 | P | OUT |
| QL00684 | perfluoroalkylamido ammonium, n=10                                                                   |            | C(NCCCN(C)C)(=O)C(F)(F)C(F)(F)C(F)(F)C(F)(F)C(F)(F)C(F)(F)C(F)(F)F                                   | -9.58  | 39.62 | 3.12 | P | IN  |
| QL00685 | perfluoroalkylamido ammonium, n=9                                                                    |            | C(NCCCN(C)C)(=O)C(F)(F)C(F)(F)C(F)(F)C(F)(F)C(F)(F)C(F)(F)F                                          | -9.40  | 38.00 | 3.08 | P | IN  |
| QL00686 | perfluoroalkylamido ammonium, n=8                                                                    |            | C(NCCCN(C)C)(=O)C(F)(F)C(F)(F)C(F)(F)C(F)(F)C(F)(F)C(F)(F)F                                          | -8.99  | 36.17 | 2.95 | P | IN  |
| QL00687 | perfluoroalkylamido ammonium, n=7                                                                    |            | C(NCCCN(C)C)(=O)C(F)(F)C(F)(F)C(F)(F)C(F)(F)C(F)(F)F                                                 | -8.79  | 34.09 | 2.91 | P | IN  |
| QL00688 | perfluoroalkylamido ammonium, n=6                                                                    |            | C(NCCCN(C)C)(=O)C(F)(F)C(F)(F)C(F)(F)C(F)(F)F                                                        | -8.31  | 31.71 | 2.76 | P | OUT |
| QL00689 | perfluoroalkylamido ammonium, n=5                                                                    |            | C(NCCCN(C)C)(=O)C(F)(F)C(F)(F)C(F)(F)F                                                               | -8.02  | 28.95 | 2.71 | P | OUT |
| QL00690 | perfluoroalkylamido ammonium, n=4                                                                    |            | C(NCCCN(C)C)(=O)C(F)(F)C(F)(F)F                                                                      | -7.43  | 25.71 | 2.53 | P | OUT |
| QL00691 | perfluoroalkylamido ammonium, n=3                                                                    |            | C(NCCCN(C)C)(=O)C(F)(F)C(F)(F)F                                                                      | -6.98  | 21.88 | 2.44 | P | OUT |
| QL00692 | 1-((3-(Dimethylamino)propyl)amino)-3-(perfluoro-7-methyloctyl)propan-2-ol                            | 73353-26-1 | C(NCCCN(C)C)C(O)CC(F)(F)C(F)(F)C(F)(F)C(F)(F)C(F)(F)C(F)(F)C(F)(F)C(F)(F)F                           | -9.10  | 32.76 | 3.09 | P | OUT |
| QL00693 | 1-((3-(Dimethylamino)propyl)amino)-3-(perfluoro-11-methyldodecyl)propan-2-ol                         | 94159-82-7 | C(NCCCN(C)C)C(O)CC(F)(F)C(F)(F)C(F)(F)C(F)(F)C(F)(F)C(F)(F)C(F)(F)C(F)(F)C(F)(F)C(F)(F)F             | -10.11 | 38.57 | 3.39 | P | OUT |
| QL00694 | 1-((3-(Dimethylamino)propyl)amino)-3-(perfluorododecyl)propan-2-ol                                   | 94159-79-2 | C(NCCCN(C)C)C(O)CC(F)(F)C(F)(F)C(F)(F)C(F)(F)C(F)(F)C(F)(F)C(F)(F)C(F)(F)F                           | -10.10 | 37.31 | 3.41 | P | OUT |
| QL00695 | 1-((3-(Dimethylamino)propyl)amino)-3-(perfluorodecyl)propan-2-ol                                     | 94159-80-5 | C(NCCCN(C)C)C(O)CC(F)(F)C(F)(F)C(F)(F)C(F)(F)C(F)(F)C(F)(F)C(F)(F)F                                  | -9.62  | 34.43 | 3.28 | P | OUT |
| QL00696 | H-substituted Perfluoroalkyl (linear) carboxylic acids_i, n=15                                       |            | C(O)(=O)C(F)C(F)(F)C(F)(F)C(F)(F)C(F)(F)C(F)(F)C(F)(F)C(F)(F)C(F)(F)C(F)(F)C(F)(F)C(F)(F)F           | -11.13 | 60.38 | 3.24 | P | OUT |
| QL00697 | H-substituted Perfluoroalkyl (linear) carboxylic acids_i, n=14                                       |            | C(O)(=O)C(F)C(F)(F)C(F)(F)C(F)(F)C(F)(F)C(F)(F)C(F)(F)C(F)(F)C(F)(F)C(F)(F)F                         | -10.85 | 60.00 | 3.12 | P | OUT |
| QL00698 | H-substituted Perfluoroalkyl (linear) carboxylic acids_i, n=13                                       |            | C(O)(=O)C(F)C(F)(F)C(F)(F)C(F)(F)C(F)(F)C(F)(F)C(F)(F)C(F)(F)C(F)(F)F                                | -10.72 | 59.57 | 3.07 | P | OUT |
| QL00699 | H-substituted Perfluoroalkyl (linear) carboxylic acids_i, n=12                                       |            | C(O)(=O)C(F)C(F)(F)C(F)(F)C(F)(F)C(F)(F)C(F)(F)C(F)(F)C(F)(F)F                                       | -10.40 | 59.09 | 2.95 | P | OUT |
| QL00700 | H-substituted Perfluoroalkyl (linear) carboxylic acids_i, n=11                                       |            | C(O)(=O)C(F)C(F)(F)C(F)(F)C(F)(F)C(F)(F)C(F)(F)C(F)(F)F                                              | -10.26 | 58.54 | 2.89 | P | OUT |
| QL00701 | H-substituted Perfluoroalkyl (linear) carboxylic acids_i, n=10                                       |            | C(O)(=O)C(F)C(F)(F)C(F)(F)C(F)(F)C(F)(F)C(F)(F)F                                                     | -9.89  | 57.89 | 2.75 | P | OUT |
| QL00702 | H-substituted Perfluoroalkyl (linear) carboxylic acids_i, n=9                                        |            | C(O)(=O)C(F)C(F)(F)C(F)(F)C(F)(F)C(F)(F)F                                                            | -9.71  | 57.14 | 2.69 | P | IN  |
| QL00703 | H-substituted Perfluoroalkyl (linear) carboxylic acids_i, n=8                                        |            | C(O)(=O)C(F)C(F)(F)C(F)(F)C(F)(F)C(F)(F)F                                                            | -9.27  | 56.25 | 2.52 | P | IN  |
| QL00704 | H-substituted Perfluoroalkyl (linear) carboxylic acids_i, n=7                                        |            | C(O)(=O)C(F)C(F)(F)C(F)(F)C(F)(F)F                                                                   | -9.06  | 55.17 | 2.45 | P | IN  |
| QL00705 | H-substituted Perfluoroalkyl (linear) carboxylic acids_i, n=6                                        |            | C(O)(=O)C(F)C(F)(F)C(F)(F)C(F)(F)F                                                                   | -8.52  | 53.85 | 2.24 | P | IN  |



[illegible]













|         |                                                                                                                          |            |                                                                             |       |       |      |   |     |
|---------|--------------------------------------------------------------------------------------------------------------------------|------------|-----------------------------------------------------------------------------|-------|-------|------|---|-----|
| QL00858 | 2,2,3,3,4,4,5,5,6,6,7,7,8,8,9,9-Heptadecafluorononyl methacrylate (Perfluorohexyl)methyl                                 | 48077-33-4 | CC(=C)C(=O)OCC(F)(F)C(F)(F)C(F)(F)C(F)(F)C(F)(F)C(F)(F)F                    | -9.00 | 43.59 | 2.74 | P | IN  |
| QL00859 | methacrylate (6H-Perfluorohexyl)methyl                                                                                   | 48076-44-4 | CC(=C)C(=O)OCC(F)(F)C(F)(F)C(F)(F)C(F)(F)C(F)(F)F                           | -8.24 | 39.39 | 2.52 | P | IN  |
| QL00860 | methacrylate 2,2,3,3,4,4,5,5,6,6,6-Undecafluorohexyl 2-methylprop-2-enoate                                               | 2261-99-6  | CC(=C)C(=O)OCC(F)(F)C(F)(F)C(F)(F)C(F)(F)C(F)F                              | -8.05 | 36.36 | 2.52 | P | IN  |
| QL00861 | 2,2,3,3,4,4,5,5,5-Nonafluoropentyl methacrylate                                                                          | 13173-36-9 | CC(=C)C(=O)OCC(F)(F)C(F)(F)C(F)(F)C(F)(F)F                                  | -7.96 | 36.67 | 2.47 | P | IN  |
| QL00862 | 1H,1H,5H-Perfluoropentyl methacrylate                                                                                    | 59006-65-4 | CC(=C)C(=O)OCC(F)(F)C(F)(F)C(F)(F)C(F)F                                     | -7.29 | 33.33 | 2.26 | P | IN  |
| QL00863 | 1H,1H-Perfluorobutyl methacrylate                                                                                        | 355-93-1   | CC(=C)C(=O)OCC(F)(F)C(F)(F)C(F)C(F)F                                        | -7.08 | 29.63 | 2.27 | P | IN  |
| QL00864 | 1H,1H-Perfluoropropyl methacrylate                                                                                       | 13695-31-3 | CC(=C)C(=O)OCC(F)(F)C(F)(F)C(F)C(F)F                                        | -6.75 | 29.17 | 2.13 | P | IN  |
| QL00865 | 1H,1H-Perfluoropropyl methacrylate                                                                                       | 45115-53-5 | CC(=C)C(=O)OCC(F)(F)C(F)(F)F                                                | -5.82 | 23.81 | 1.86 | P | OUT |
| QL00866 | 1H,1H,3H-Perfluorobutyl 2-methylacrylate                                                                                 | 36405-47-7 | CC(=C)C(=O)OCC(F)(F)C(F)C(F)(F)F                                            | -6.53 | 25.00 | 2.15 | P | OUT |
| QL00867 | 4,4,5,5,6,7,7,7-Octafluoro-2-hydroxy-6-(trifluoromethyl)heptyl 2-methylprop-2-enoate                                     | 16083-79-7 | CC(=C)C(=O)OCC(O)CC(F)(F)C(F)(F)C(F)(F)C(F)(F)C(F)F                         | -7.50 | 29.73 | 2.46 | P | OUT |
| QL00868 | 3-(Perfluoro-5-methylhexyl)-2-hydroxypropyl methacrylate (Perfluoro-7-methyloctyl)-2-hydroxypropyl 2-methylprop-2-enoate | 16083-81-1 | CC(=C)C(=O)OCC(O)CC(F)(F)C(F)(F)C(F)(F)C(F)(F)C(F)(F)C(F)(F)F               | -8.39 | 34.88 | 2.71 | P | IN  |
| QL00869 | 4,4,5,5,6,6,7,7,8,8,9,10,10,11,11-Heptadecafluoro-2-hydroxyundecyl 2-methylprop-2-enoate                                 | 88752-37-8 | CC(=C)C(=O)OCC(O)CC(F)(F)C(F)(F)C(F)(F)C(F)(F)C(F)(F)C(F)(F)C(F)(F)C(F)(F)F | -9.08 | 38.78 | 2.91 | P | IN  |
| QL00870 | 4,4,5,5,6,6,7,7,8,8,9,9,9-Tridecafluoro-2-hydroxynonyl 2-methylprop-2-enoate                                             | 93706-76-4 | CC(=C)C(=O)OCC(O)CC(F)(F)C(F)(F)C(F)(F)C(F)(F)C(F)(F)C(F)(F)C(F)F           | -9.04 | 36.96 | 2.95 | P | IN  |
| QL00871 | 4,4,5,5,6,6,7,7,7-Nonafluoro-2-hydroxyheptyl 2-methylprop-2-enoate                                                       | 86994-47-0 | CC(=C)C(=O)OCC(O)CC(F)(F)C(F)(F)C(F)(F)C(F)(F)C(F)(F)C(F)F                  | -8.35 | 32.50 | 2.76 | P | IN  |
| QL00872 | (Perfluorocyclohexyl)methyl methacrylate                                                                                 | 36915-03-4 | CC(=C)C(=O)OCC(O)CC(F)(F)C(F)(F)C(F)(F)C(F)(F)F                             | -7.46 | 26.47 | 2.52 | P | OUT |
| QL00873 | 2-(Perfluoro-3-methylbutyl)ethyl methacrylate                                                                            | 25965-83-7 | CC(=C)C(=O)OCC1(F)C(F)(F)C(F)(F)C(F)(F)C(F)C1(F)F                           | -7.28 | 35.48 | 2.20 | P | IN  |
| QL00874 | 3,3,4,4,5,5,6,6,7,7-Decafluorooctyl 2-methylprop-2-enoate                                                                | 65195-44-0 | CC(=C)C(=O)OCCC(F)(F)C(F)(F)C(F)(F)C(F)(F)C(F)(F)F                          | -7.49 | 33.33 | 2.35 | P | IN  |
| QL00875 | (Perfluoro-5-methylhexyl)ethyl 2-methylprop-2-enoate                                                                     | 61915-92-2 | CC(=C)C(=O)OCCC(F)(F)C(F)(F)C(F)(F)C(F)(F)C(F)C(F)F                         | -7.56 | 27.78 | 2.53 | P | OUT |
| QL00876 | 102 Fluorotelomer methacrylate                                                                                           | 50836-66-3 | CC(=C)C(=O)OCCC(F)(F)C(F)(F)C(F)(F)C(F)(F)C(F)(F)C(F)(F)C(F)(F)F            | -8.48 | 38.46 | 2.65 | P | IN  |
| QL00877 | 82 Fluorotelomer methacrylate                                                                                            | 2144-54-9  | CC(=C)C(=O)OCCC(F)(F)C(F)(F)C(F)(F)C(F)(F)C(F)(F)C(F)(F)C(F)(F)C(F)(F)F     | -9.74 | 43.75 | 3.07 | P | IN  |
| QL00878 | 3,3,4,4,5,5,5-Heptafluoropentyl 2-methylprop-2-enoate                                                                    | 1996-88-9  | CC(=C)C(=O)OCCC(F)(F)C(F)(F)C(F)(F)C(F)(F)C(F)(F)C(F)F                      | -9.16 | 40.48 | 2.90 | P | IN  |
| QL00879 |                                                                                                                          | 2145-81-5  | CC(=C)C(=O)OCCC(F)(F)C(F)(F)C(F)F                                           | -6.73 | 25.93 | 2.21 | P | OUT |









|         |                                                                                                                                                                                                                                                                                                                                                                                                                                                                                                                                                                                                                                                                                                                                                                                                                                                             |                                                                                                                                                                                   |                                                                                            |
|---------|-------------------------------------------------------------------------------------------------------------------------------------------------------------------------------------------------------------------------------------------------------------------------------------------------------------------------------------------------------------------------------------------------------------------------------------------------------------------------------------------------------------------------------------------------------------------------------------------------------------------------------------------------------------------------------------------------------------------------------------------------------------------------------------------------------------------------------------------------------------|-----------------------------------------------------------------------------------------------------------------------------------------------------------------------------------|--------------------------------------------------------------------------------------------|
| QL00943 | 2-Methyl-2-trifluoromethylperfluoropentane 3,3,4,4,5,5,6,6,7,7,8,8,9,9,10,10-Heptafluoro-2-methyldecanoic acid                                                                                                                                                                                                                                                                                                                                                                                                                                                                                                                                                                                                                                                                                                                                              | 100645-99-6                                                                                                                                                                       | CC(C(F)(F)F)(C(F)(F)F)C(F)(F)C(F)(F)C(F)(F)F                                               |
| QL00944 | 1,1,1,2,2,3,3,4,4,5,5,6,6-Tridecafluoro-7-methyl-7-nitrooctane                                                                                                                                                                                                                                                                                                                                                                                                                                                                                                                                                                                                                                                                                                                                                                                              | 136022-86-1                                                                                                                                                                       | CC(C(O)=O)C(F)(F)C(F)(F)C(F)(F)C(F)(F)C(F)(F)C(F)(F)F                                      |
| QL00945 | heptafluoro-2,2-dimethyl-5-oxooct-3-en-3-olate (3Z)-6,6,7,7,8,8,8-heptafluoro-2,2-dimethyl-5-oxooct-3-en-3-olate (1/1/1) 1,1,1,2,2,3,3-heptafluoro-6-hydroxy-7,7-dimethyloct-5-en-4-one Silver, (6,6,7,7,8,8,8-heptafluoro-2,2-dimethyl-3,5-octanedionato- $\beta$ O3, $\beta$ O5)- 1,1,1,2,2,3,3-Heptafluoro-6-hydroxy-7,7-dimethyloct-5-en-4-one--copper (2/1) Lead, bis(6,6,7,7,8,8,8-heptafluoro-2,2-dimethyl-3,5-octanedionato- $\beta$ O, $\beta$ O)-, (T-4)- (9Cl) Europium, tris(6,6,7,7,8,8,8-heptafluoro-2,2-dimethyl-3,5-octanedionato- $\beta$ O3, $\beta$ O5)- Erbium, tris(6,6,7,7,8,8,8-heptafluoro-2,2-dimethyl-3,5-octanedionato- $\beta$ O3, $\beta$ O5)- Neodymium, tris(6,6,7,7,8,8,8-heptafluoro-2,2-dimethyl-3,5-octanedionato- $\beta$ O3, $\beta$ O5)- Praseodymium, tris(6,6,7,7,8,8,8-heptafluoro-2,2-dimethyl-3,5-octanedionato- | 84108-41-8                                                                                                                                                                        | CC(C)([N+](=[O-])=O)C(F)(F)C(F)(F)C(F)(F)C(F)(F)C(F)(F)F                                   |
| QL00946 | N-{1-[3,5-Bis({[tert-butyl(dimethyl)silyl]oxy)methyl}phenyl]-2,2,3,3,4,4,5,5,6,6,7,7,7-tridecafluoroheptylidene}hydroxylamine                                                                                                                                                                                                                                                                                                                                                                                                                                                                                                                                                                                                                                                                                                                               | 124053-49-2 62773-05-1 76121-99-8 38926-19-8 21600-78-1 17631-68-4 17978-75-5 17978-76-6 17978-77-7 18323-96-7 18323-97-1 18323-98-2 172424-98-3 19106-89-9 19186-73-3 80289-21-0 | CC(C)/C(O)=C/C(C(F)(C(F)(F)F)F)=O)C                                                        |
| QL00947 | 1-[3,5-Bis({[tert-butyl(dimethyl)silyl]oxy)methyl}phenyl]-2,2,3,3,4,4,5,5,6,6,7,7,7-tridecafluoroheptylidene}hydroxylamine                                                                                                                                                                                                                                                                                                                                                                                                                                                                                                                                                                                                                                                                                                                                  | 1335496-61-1                                                                                                                                                                      | CC(C)(C)[Si](C)(C)OCc1cc(CO[Si](C)(C)C(C)C)cc(c1C(=NO)C(F)(F)C(F)(F)C(F)(F)C(F)(F)C(F)(F)F |
| QL00948 | 1-[3,5-Bis({[tert-butyl(dimethyl)silyl]oxy)methyl}phenyl]-2,2,3,3,4,4,5,5,6,6,7,7,7-tridecafluoroheptan-1-one                                                                                                                                                                                                                                                                                                                                                                                                                                                                                                                                                                                                                                                                                                                                               | 1335496-60-0                                                                                                                                                                      | CC(C)(C)[Si](C)(C)OCc1cc(CO[Si](C)(C)C(C)C)cc(c1C(=O)C(F)(F)C(F)(F)C(F)(F)C(F)(F)C(F)(F)F  |
| QL00949 | 6,6,7,7,8,8,8-Heptafluoro-2,2-dimethyl-3,4,5-octanetrione 4-(4-nitrophenyl)hydrazone                                                                                                                                                                                                                                                                                                                                                                                                                                                                                                                                                                                                                                                                                                                                                                        | 80284-51-1                                                                                                                                                                        | CC(C)(C)C(=O)C(=NNC1=CC=C(C=C1)[N+](=[O-])=O)C(F)(F)C(F)(F)C(F)(F)F                        |
| QL00950 | 6,6,7,7,8,8,9,9-Nonafluoro-2,2-dimethylnon-4-en-3-one                                                                                                                                                                                                                                                                                                                                                                                                                                                                                                                                                                                                                                                                                                                                                                                                       | 105602-69-5                                                                                                                                                                       | CC(C)(C)C(=O)C=CC(F)(F)C(F)(F)C(F)(F)F                                                     |
| QL00951 | (Heptafluorobutanoyl)pivaloylmetane                                                                                                                                                                                                                                                                                                                                                                                                                                                                                                                                                                                                                                                                                                                                                                                                                         | 17587-22-3                                                                                                                                                                        | CC(C)(C)C(=O)CC(=O)C(F)(F)C(F)(F)F                                                         |
| QL00952 | 4H,4H-Perfluoro-6,6-dimethylheptane-3,5-dione                                                                                                                                                                                                                                                                                                                                                                                                                                                                                                                                                                                                                                                                                                                                                                                                               | 2145-68-8                                                                                                                                                                         | CC(C)(C)C(=O)CC(=O)C(F)(F)C(F)(F)F                                                         |
| QL00953 | 1,1-Difluoro-5,5-dimethyl-1-(trifluoromethoxy)hexane-2,4-dione                                                                                                                                                                                                                                                                                                                                                                                                                                                                                                                                                                                                                                                                                                                                                                                              | 61894-06-2                                                                                                                                                                        | CC(C)(C)C(=O)CC(=O)C(F)(F)OC(F)(F)F                                                        |
| QL00954 | 1,1,1,2,2,3,3,4,4-Nonafluoro-6-iodo-7,7-dimethyloctane                                                                                                                                                                                                                                                                                                                                                                                                                                                                                                                                                                                                                                                                                                                                                                                                      | 1464148-69-3                                                                                                                                                                      | CC(C)(C)C(I)CC(F)(F)C(F)(F)C(F)(F)C(F)(F)F                                                 |
| QL00955 | 6-Amino-1,1,1,2,2,3,3-heptafluoro-7,7-dimethyloct-5-en-4-one                                                                                                                                                                                                                                                                                                                                                                                                                                                                                                                                                                                                                                                                                                                                                                                                | 188838-46-2                                                                                                                                                                       | CC(C)(C)C(N)=CC(=O)C(F)(F)C(F)(F)C(F)(F)F                                                  |

|       |       |      |   |     |
|-------|-------|------|---|-----|
| -7.52 | 56.52 | 1.72 | P | IN  |
| -8.80 | 48.57 | 2.52 | P | IN  |
| -7.77 | 41.94 | 2.24 | P | IN  |
| -6.43 | 23.33 | 2.15 | P | OUT |
| -7.58 | 15.48 | 2.89 | P | OUT |
| -7.60 | 15.85 | 2.88 | P | OUT |
| -7.15 | 15.91 | 2.68 | P | OUT |
| -6.93 | 28.13 | 2.24 | P | OUT |
| -6.43 | 23.33 | 2.15 | P | OUT |
| -5.54 | 18.52 | 1.88 | P | OUT |
| -6.08 | 17.86 | 2.15 | P | OUT |
| -6.95 | 31.25 | 2.17 | P | IN  |
| -6.38 | 22.58 | 2.15 | P | OUT |



|         |                                                                                                                                                                         |              |                                                                                         |       |       |      |   |     |
|---------|-------------------------------------------------------------------------------------------------------------------------------------------------------------------------|--------------|-----------------------------------------------------------------------------------------|-------|-------|------|---|-----|
| QL00979 | N-[(2S)-2-Amino-3-methylbutyl]-1,1,2,2,3,3,4,4,4-nonafluorobutane-1-sulfonamide N,N-Dimethyl-N-(propan-2-yl)propan-2-aminium                                            | 1417316-15-4 | CC(C)[C@H](N)CNS(=O)(=O)C(F)(F)C(F)(F)C(F)(F)F                                          | -7.24 | 25.00 | 2.47 | P | OUT |
| QL00980 | nonafluorobutane-1-sulfonate (3,3,4,4,5,5,6,6,7,7,8,8,9,9,10,10,11,11,12,12,12-Henicosafluorododecyl)di(propan-2-yl)silane ((Perfluorooctyl)ethyl)di(propan-2-yl)silane | 374571-81-0  | CC(C)[N+](C)(C)C(C)C.[O-]S(=O)(=O)C(F)(F)C(F)(F)C(F)(F)C(F)(F)F                         | -6.17 | 19.57 | 2.14 | P | OUT |
| QL00981 | Di(propan-2-yl)(3,3,4,4,5,5,6,6,7,7,8,8,8-tridecafluorooctyl)silane                                                                                                     | 356056-16-1  | CC(C)[SiH](CCC(F)(F)C(F)(F)C(F)(F)C(F)(F)C(F)(F)C(F)(F)C(F)(F)C(F)(F)C(C)C              | -8.91 | 35.59 | 2.93 | P | IN  |
| QL00982 | Di(propan-2-yl)(3,3,4,4,5,5,6,6,7,7,8,8,8-tridecafluorooctyl)silane                                                                                                     | 356056-15-0  | CC(C)[SiH](CCC(F)(F)C(F)(F)C(F)(F)C(F)(F)C(F)(F)C(F)(F)C(F)(F)C(C)C                     | -8.25 | 32.08 | 2.73 | P | OUT |
| QL00983 | Nonafluorohexyl)di(propan-2-yl)silane                                                                                                                                   | 356056-14-9  | CC(C)[SiH](CCC(F)(F)C(F)(F)C(F)(F)C(F)(F)C(F)(F)C(C)C                                   | -7.46 | 27.66 | 2.49 | P | OUT |
| QL00984 | 6-(1-Methylethylidene)-5-(triphenylphosphoranlydene)-(perfluoro)-nonan-4-one                                                                                            | 356056-13-8  | CC(C)[SiH](CCC(F)(F)C(F)(F)C(F)(F)C(F)(F)C(C)C                                          | -6.50 | 21.95 | 2.22 | P | OUT |
| QL00985 | 7,7,8,8,9,9-Heptafluoro-2-methylnon-2-ene-4,6-dione                                                                                                                     | 139225-92-6  | CC(C)=C(C(C(=O)C(F)(F)C(F)C(F)F)=P(C1=CC=CC=C1)(C1=CC=CC=C1)C1=CC=CC=C1)C(F)(F)C(F)(F)F | -6.56 | 20.90 | 2.28 | P | OUT |
| QL00986 | 5,6,6,7,7,8,8-Octafluoro-2-methylocta-2,4-diene                                                                                                                         | 559-99-9     | CC(C)=CC(=O)CC(=O)C(F)(F)C(F)(F)C(F)(F)F                                                | -6.75 | 25.00 | 2.25 | P | OUT |
| QL00987 | 5,5,6,6,7,7,8,8-Nonafluoro-2-methyloct-2-ene                                                                                                                            | 90292-28-7   | CC(C)=CC=C(C(F)(F)C(F)(F)C(F)(F)F                                                       | -7.04 | 32.00 | 2.18 | P | IN  |
| QL00988 | 2-Methylprop-1-en-1-yl                                                                                                                                                  | 97294-02-5   | CC(C)=CCC(F)(F)C(F)(F)C(F)(F)F                                                          | -7.14 | 33.33 | 2.19 | P | IN  |
| QL00989 | nonafluorobutane-1-sulfonate 1,1,1,2-Tetrafluoro-4-methyl-2-(trifluoromethyl)pentan-3-one                                                                               | 84224-48-6   | CC(C)=COS(=O)(=O)C(F)(F)C(F)(F)C(F)(F)C(F)(F)F                                          | -7.18 | 32.14 | 2.24 | P | IN  |
| QL00990 | 3,3,4,4,5,5,6,6,7,7,8,8,8-tridecafluorooctyl 2-methylpropanoate                                                                                                         | 62656-72-8   | CC(C)C(=O)C(F)(C(F)(F)C(F)(F)F                                                          | -5.29 | 31.82 | 1.40 | P | IN  |
| QL00991 | 3,3,4,4,5,5,6,6-Nonafluorohexyl 2,2-difluoro-3-hydroxy-4-methylpentanoate                                                                                               | 242812-05-1  | CC(C)C(=O)OCCC(F)(F)C(F)(F)C(F)(F)C(F)(F)C(F)(F)F                                       | -8.34 | 34.21 | 2.71 | P | IN  |
| QL00992 | 1-(1,3-Dimethylbutoxy)-2-(perfluorohexyl)ethane                                                                                                                         | 1370345-78-0 | CC(C)C(O)C(F)(F)C(=O)OCCC(F)(F)C(F)(F)C(F)(F)C(F)(F)F                                   | -7.75 | 28.21 | 2.61 | P | OUT |
| QL00993 | 3-Methylbutyl heptadecafluorononanoate                                                                                                                                  | 210896-25-6  | CC(C)CC(C)OCCC(F)(F)C(F)(F)C(F)(F)C(F)(F)C(F)(F)F                                       | -8.14 | 28.89 | 2.76 | P | OUT |
| QL00994 | 3-Methylbutyl 2,3,3,3-tetrafluoro-2-(heptafluoropropoxy)propanoate                                                                                                      | 117374-32-0  | CC(C)CCOC(=O)C(F)(F)C(F)(F)C(F)(F)C(F)(F)C(F)(F)F                                       | -9.04 | 38.64 | 2.90 | P | IN  |
| QL00995 | Diisopentyl 2-[(2,2,3,3,4,4-heptafluorobutanoyl)amino]succinate                                                                                                         | 183873-56-5  | CC(C)CCOC(=O)C(F)(OC(F)(F)C(F)(F)C(F)(F)C(F)(F)F                                        | -7.72 | 30.56 | 2.53 | P | OUT |
| QL00996 | 2,2,3,3,4,4,4-Heptafluoro-N-bis(2-methylpropyl)butanamide                                                                                                               | 75743-06-5   | CC(C)CCOC(=O)CC(NC(=O)C(F)(F)C(F)(F)C(F)(F)F)C(=O)OCCC(C)C                              | -7.01 | 12.28 | 2.72 | P | OUT |
| QL00997 | 2,2,3,3,4,4,4-Heptafluoro-N-(2-methylpropyl)butanamide                                                                                                                  | 336-30-1     | CC(C)CN(CC(C)C)C(=O)C(F)(F)C(F)(F)C(F)(F)F                                              | -6.04 | 17.95 | 2.12 | P | OUT |
| QL00998 | Tris(2-methylpropyl) 3-(2,2,3,3,4,4-heptafluorobutanamido)propane-1,1,3-tricarboxylate                                                                                  | 75668-25-6   | CC(C)CNC(=O)C(F)(F)C(F)(F)C(F)(F)F                                                      | -6.66 | 25.93 | 2.18 | P | OUT |
| QL00999 | 2-Methylpropyl 2,3,3,3-tetrafluoro-2-(heptafluoropropoxy)propanoate                                                                                                     | 95654-14-1   | CC(C)COC(=O)C(C(C(=O)OCC(C)C)C(=O)OCC(C)C)NC(=O)C(F)(F)C(F)(F)C(F)(F)F                  | -6.84 | 10.14 | 2.70 | P | OUT |
| QL01000 | 2-Methylpropyl 2,3,3,3-tetrafluoro-2-(heptafluoropropoxy)propanoate                                                                                                     | 183873-54-3  | CC(C)COC(=O)C(F)(OC(F)(F)C(F)(F)C(F)(F)C(F)(F)F                                         | -7.72 | 33.33 | 2.45 | P | IN  |



[illegible]

[illegible]

|         |                                                                                                                   |              |                                                                                                       |        |       |      |   |     |
|---------|-------------------------------------------------------------------------------------------------------------------|--------------|-------------------------------------------------------------------------------------------------------|--------|-------|------|---|-----|
| QL01064 | 1,1,1-Trifluoropropan-2-yl<br>nonafluorobutane-1-sulfonate                                                        | 118334-94-4  | CC(OS(=O)(=O)C(F)(F)C(F)C(F)C(F)C(F)C(F)F                                                             | -7.92  | 44.44 | 2.24 | P | IN  |
| QL01065 | 2,2,3,3,4,4,5,5,6,6,7,7,8,8,8-Pentadecafluorooctyl 4'-[(2S)-2-methylbutyl][1,1'-biphenyl]-4-carboxylate           | 118826-52-1  | CC[C@H](C)CC1ccc(cc1)-c1ccc(cc1)C(=O)OCC(F)(F)C(F)(F)C(F)(F)C(F)(F)C(F)(F)C(F)(F)C(F)(F)F             | -9.39  | 23.44 | 3.48 | P | OUT |
| QL01066 | N,N,N,-Triethylethanaminium<br>1,1,2,2,3,3,4,4,4-nonafluorobutane-1-sulfonate                                     | 25628-08-4   | CC[N+](CC)(CC)C(C)OS(=O)(=O)C(F)(F)C(F)(F)C(F)(F)C(F)(F)F                                             | -6.88  | 20.00 | 2.45 | P | OUT |
| QL01067 | N,N,N,-Triethylethanaminium<br>pentadecafluorooctanoate                                                           | 98241-25-9   | CC[N+](CC)(CC)CC.[O-]C(=O)C(F)(F)C(F)(F)C(F)(F)C(F)(F)C(F)(F)C(F)(F)C(F)(F)C(F)(F)F                   | -8.25  | 27.78 | 2.85 | P | OUT |
| QL01068 | Tetraethylammonium<br>perfluoroisooctanesulfonate                                                                 | 93894-70-3   | CC[N+](CC)(CC)CC.[O-]S(=O)(=O)C(F)(F)C(F)(F)C(F)(F)C(F)(F)C(F)(F)C(F)(F)C(F)(F)F                      | -8.24  | 29.31 | 2.80 | P | OUT |
| QL01069 | tetraethylammonium<br>heptadecafluorooctanesulphonate                                                             | 56773-42-3   | CC[N+](CC)(CC)CC.[O-]S(=O)(=O)C(F)(F)C(F)(F)C(F)(F)C(F)(F)C(F)(F)C(F)(F)C(F)(F)F                      | -8.65  | 29.31 | 2.98 | P | OUT |
| QL01070 | 1-Ethyl-3-methylpyridin-1-ium<br>nonafluorobutane-1-sulfonate                                                     | 1015420-87-7 | CC[n+](CCCC(C)C1.[O-]S(=O)(=O)C(F)(F)C(F)(F)C(F)(F)C(F)(F)F                                           | -5.90  | 23.68 | 1.90 | P | OUT |
| QL01071 | N,N-Diethylethanaminium<br>heptadecafluorononanoate                                                               | 327176-80-7  | CC[NH+](CC)CC.[O-]C(=O)C(F)(F)C(F)(F)C(F)(F)C(F)(F)C(F)(F)C(F)(F)C(F)(F)C(F)(F)F                      | -8.86  | 33.33 | 2.97 | P | OUT |
| QL01072 | Triethylaminium perfluoro-2-propoxypropanoate                                                                     | 165951-18-8  | CC[NH+](CC)CC.[O-]C(=O)C(F)(OC(F)(F)C(F)(F)C(F)(F)C(F)(F)C(F)(F)F                                     | -7.10  | 25.58 | 2.39 | P | OUT |
| QL01073 | Triethylaminium perfluoro-2-(2-propoxypropoxy)propanoate                                                          | 165951-19-9  | CC[NH+](CC)CC.[O-]C(=O)C(F)(OC(F)(F)C(F)(OC(F)(F)C(F)(F)C(F)(F)C(F)(F)C(F)(F)F                        | -8.68  | 32.08 | 2.92 | P | OUT |
| QL01074 | N,N-diethylethanaminium<br>(perfluorooctyl)ethylphosphonate (11)                                                  | 92678-96-1   | CC[NH+](CC)CC.OP([O-])(=O)CCC(F)(F)C(F)(F)C(F)(F)C(F)(F)C(F)(F)C(F)(F)C(F)(F)C(F)(F)F                 | -8.97  | 28.81 | 3.14 | P | OUT |
| QL01075 | Perfluoro-11-methyldodecanoic acid compd. with ethanamine                                                         | 68015-87-2   | CC[NH3+].[O-]C(=O)C(F)(F)C(F)(F)C(F)(F)C(F)(F)C(F)(F)C(F)(F)C(F)(F)C(F)(F)C(F)(F)C(F)(F)F             | -9.84  | 49.02 | 2.97 | P | IN  |
| QL01076 | Perfluoro-13-methyltetradecanoic acid compd. with ethanamine                                                      | 68052-68-6   | CC[NH3+].[O-]C(=O)C(F)(F)C(F)(F)C(F)(F)C(F)(F)C(F)(F)C(F)(F)C(F)(F)C(F)(F)C(F)(F)C(F)(F)C(F)(F)F      | -10.34 | 50.88 | 3.14 | P | OUT |
| QL01077 | (2S)-2-[Bis[4-(heptadecafluorooctyl)phenyl]][(triethylsilyl)oxy]methyl]pyrrolidine                                | 914391-37-0  | CC[Si](CC)(CC)OC([C@@H]1CCCN1)(c1ccc(cc1)C(F)(F)C(F)(F)C(F)(F)C(F)(F)C(F)(F)C(F)(F)C(F)(F)C(F)(F)F    | -10.39 | 31.78 | 3.70 | P | OUT |
| QL01078 | [(4-{3-[(3,3,4,4,5,5,6,6,7,7,8,8,8-Tridecafluorooctyl)sulfanyl]propyl}-1,2-phenylene)bis(oxy)]bis(triethylsilane) | 1637311-39-7 | CC[Si](CC)(CC)Oc1ccc(CCCSCC(F)(F)C(F)(F)C(F)(F)C(F)(F)C(F)(F)C(F)(F)C(F)(F)C(F)(F)F                   | -8.28  | 14.44 | 3.23 | P | OUT |
| QL01079 | 1,1,1,2-Tetrafluoro-2-(trifluoromethyl)hex-4-en-3-one                                                             | 184711-88-4  | CC=CC(=O)C(F)(C(F)(F)F)C(F)(F)F                                                                       | -6.25  | 35.00 | 1.75 | P | IN  |
| QL01080 | 4,4,5,5,6,6,7,7,8,8,9,9,10,10,11,11-Heptadecafluoroundec-2-ene (2E)-                                              | 67103-04-2   | CC=CC(F)(F)C(F)(F)C(F)(F)C(F)(F)C(F)(F)C(F)(F)C(F)(F)C(F)(F)C(F)(F)F                                  | -8.95  | 51.52 | 2.50 | P | IN  |
| QL01081 | 4,4,5,5,6,6,7,7,8,8,9,9,10,10-Pentadecafluorodec-2-ene                                                            | 89889-22-5   | CC=CC(F)(F)C(F)(F)C(F)(F)C(F)(F)C(F)(F)C(F)(F)C(F)(F)C(F)(F)F                                         | -8.73  | 50.00 | 2.44 | P | IN  |
| QL01083 | 4,4,5,5,6,6,7,7,8,8,9,9-<br>Tridecafluoro-2-nonene                                                                | 63967-46-4   | CC=CC(F)(F)C(F)(F)C(F)(F)C(F)(F)C(F)(F)C(F)(F)C(F)(F)F                                                | -8.14  | 48.15 | 2.23 | P | IN  |
| QL01085 | 1-Propenylperfluoropropane                                                                                        | 355-95-3     | CC=CC(F)(F)C(F)(F)C(F)(F)F                                                                            | -6.73  | 38.89 | 1.85 | P | IN  |
| QL01086 | 1,1,1,2,2,3,3,4,4-Nonafluoro-4-(prop-1-ene-1-sulfonyl)butane                                                      | 66406-80-2   | CC=CS(=O)(=O)C(F)(F)C(F)(F)C(F)(F)C(F)(F)F                                                            | -7.35  | 37.50 | 2.17 | P | IN  |
| QL01087 | Bis-(1H,1H,7H-perfluoroheptyl) (1S,3R)-camphorate                                                                 | 2355-57-9    | CC1(C)[C@@H](CC[C@]1(C)C(=O)OCC(F)(F)C(F)(F)C(F)(F)C(F)(F)C(F)(F)C(=O)OCC(F)(F)C(F)(F)C(F)(F)C(F)(F)F | -9.90  | 33.33 | 3.43 | P | OUT |
| QL01088 | Bicyclo[2.2.1]heptan-2-one, 3-(2,2,3,3,4,4,4-heptafluoro-1-hydroxybutylidene)-1,7,7-trimethyl-, (1R,4S)-          | 63180-06-3   | CC1(C)[C@@H]2CC[C@]1(C)C(=O)C2=C(O)C(F)(F)C(F)(F)C(F)(F)F                                             | -6.02  | 18.42 | 2.10 | P | OUT |
| QL01089 | (1S,4S)-3-(Heptafluorobutyl)camphor                                                                               | 115224-00-5  | CC1(C)[C@@H]2CC[C@]1(C)C(=O)C2C(=O)C(F)(F)C(F)(F)C(F)(F)F                                             | -6.02  | 18.42 | 2.10 | P | OUT |

|         |                                                                                        |              |                                                                                                                  |       |       |      |   |     |
|---------|----------------------------------------------------------------------------------------|--------------|------------------------------------------------------------------------------------------------------------------|-------|-------|------|---|-----|
| QL01090 | N'-(3,3-Dimethyl-3,4-dihydroisoquinolin-1-yl)-2,2,3,3,4,4,4-heptafluorobutanehydrazide | 304435-60-7  | CC1(C)Cc2cccc2C(NNC(=O)C(F)(F)C(F)(F)F)=N1                                                                       | -6.65 | 17.50 | 2.41 | P | OUT |
| QL01091 | 4,4,5,5-Tetramethyl-2-[5-(tridecafluorohexyl)thiophen-2-yl]-1,3,2-dioxaborolane        | 1338083-27-4 | CC1(C)OB(OC1(C)C)C1ccc(s1)C(F)(F)C(F)(F)C(F)(F)C(F)(F)C(F)(F)F                                                   | -8.00 | 27.66 | 2.74 | P | OUT |
| QL01092 | 4-(2,2,3,3,4,4,5,5,6,6,7,7,8,8,9,9-Hepta-decafluorononyl)-2,2-dimethyl-1,3-dioxolane   | 94159-88-3   | CC1(C)OCC(CC(F)(F)C(F)(F)C(F)(F)C(F)(F)C(F)(F)C(F)(F)C(F)(F)C(F)(F)O1                                            | -8.70 | 38.64 | 2.75 | P | IN  |
| QL01093 | 1-Methyl-N-(1,1,2,2,3,3,4,4,4-nonafluorobutane-1-sulfonyl)cyclopentane-1-carboxamide   | 1440968-23-9 | CC1(CCCC1)C(=O)NS(=O)(=O)C(F)(F)C(F)(F)C(F)(F)C(F)(F)F                                                           | -7.17 | 24.32 | 2.45 | P | OUT |
| QL01094 | 3-[(2,2,3,3,4,4,4-Heptafluorobutoxy)methyl]-3-methyloxetane                            | 156294-55-2  | CC1(COCC(F)(F)C(F)(F)C(F)(F)COC1                                                                                 | -6.58 | 24.14 | 2.20 | P | OUT |
| QL01095 | Oxetane, 3-methyl-3-[[[3,3,4,4,5,5,6,6,6-nonafluorohexyl]oxy]methyl]-                  | 475678-78-5  | CC1(COCCCF(F)(F)C(F)(F)C(F)(F)C(F)(F)COC1                                                                        | -7.31 | 25.71 | 2.48 | P | OUT |
| QL01096 | 4-(2,2,3,3,4,4,4-Heptafluorobutoxy)-1,2-dimethylpyridin-1-ium                          | 140160-19-6  | CC1=[N+](C)C=CC(OCC(F)(F)C(F)(F)C(F)(F)F)=C1                                                                     | -6.99 | 22.58 | 2.42 | P | OUT |
| QL01097 | 3-(Heptafluoropropyl)-5-methyl-4-nitro-1H-pyrazole                                     | 82633-69-0   | CC1=C(C(=NN1)C(F)(F)C(F)(F)C(F)(F)F)[N+][O-]                                                                     | -6.31 | 30.43 | 1.90 | P | IN  |
| QL01098 | 5-(Heptafluoropropyl)-6-methylpyrimidine-2,4(1H,3H)-dione                              | 145663-05-4  | CC1=C(C(=O)NC(=O)N1)C(F)(F)C(F)(F)C(F)(F)F                                                                       | -6.73 | 29.17 | 2.12 | P | IN  |
| QL01099 | 3,3'-(Perfluoro-1-cyclopentene-1,2-diyl)bis(2,5-dimethylthiophene)                     | 190394-25-3  | CC1=CC(=C(C)S1)C1=C(C2=C(C)C(S)C(C)=C2)C(F)(F)C(F)(F)C1(F)F                                                      | -5.76 | 15.38 | 2.07 | P | OUT |
| QL01100 | 3-(Perfluoro-1-hexyl)-5-(methyl)pyrazole                                               | 129257-23-4  | CC1=CC(=NN1)C(F)(F)C(F)(F)C(F)(F)C(F)(F)C(F)(F)F                                                                 | -8.34 | 43.33 | 2.45 | P | IN  |
| QL01101 | 3-(Perfluoropentyl)-5-methylpyrazole                                                   | 82633-43-0   | CC1=CC(=NN1)C(F)(F)C(F)(F)C(F)(F)C(F)(F)C(F)(F)F                                                                 | -7.71 | 40.74 | 2.24 | P | IN  |
| QL01102 | 3-(Heptafluoropropyl)-5-methyl-1H-pyrazole                                             | 75823-64-2   | CC1=CC(=NN1)C(F)(F)C(F)(F)C(F)(F)F                                                                               | -6.54 | 33.33 | 1.92 | P | IN  |
| QL01103 | Diphenyl(2,4,6-trimethylphenyl)sulfonium perfluoro-1-octanesulfonate                   | 258341-99-0  | CC1=CC(C)=C([S+](C2=CC=CC=C2)C2=CC=CC=C2)C(C)=C1.[O-]S(=O)(=O)C(F)(F)C(F)(F)C(F)(F)C(F)(F)C(F)(F)C(F)(F)C(F)(F)F | -7.12 | 23.61 | 2.45 | P | OUT |
| QL01104 | 2,2,3,3,4,4,5,5-Nonafluoro-1-(4-methylphenyl)pentan-1-one                              | 647-60-9     | CC1=CC=C(C=C1)C(=O)C(F)(F)C(F)(F)C(F)(F)C(F)(F)F                                                                 | -7.59 | 31.03 | 2.46 | P | IN  |
| QL01105 | 2,2,3,3,4,4,4-Heptafluoro-1-(4-methylphenyl)butan-1-one                                | 559-92-2     | CC1=CC=C(C=C1)C(=O)C(F)(F)C(F)(F)C(F)(F)F                                                                        | -6.91 | 26.92 | 2.27 | P | OUT |
| QL01106 | 4-(Heptafluoroisopropyl)toluene                                                        | 2396-26-1    | CC1=CC=C(C=C1)C(F)(C(F)(F)C(F)(F)F                                                                               | -6.24 | 29.17 | 1.90 | P | IN  |
| QL01108 | 2,2,3,3,4,4,5,5,6,6,7,7,8,8,8-Pentadecafluorooctyl 4-methylbenzene-1-sulfonate         | 24962-65-0   | CC1=CC=C(C=C1)S(=O)(=O)OCC(F)(F)C(F)(F)C(F)(F)C(F)(F)C(F)(F)C(F)(F)C(F)(F)F                                      | -8.92 | 34.88 | 2.95 | P | IN  |
| QL01109 | 1H,1H,7H-Perfluoroheptyl 4-methylbenzenesulfonate                                      | 424-16-8     | CC1=CC=C(C=C1)S(=O)(=O)OCC(F)(F)C(F)(F)C(F)(F)C(F)(F)C(F)(F)C(F)(F)F                                             | -8.41 | 30.00 | 2.86 | P | OUT |
| QL01110 | 1h,1h-perfluorohexyl p-toluenesulfonate                                                | 355-77-1     | CC1=CC=C(C=C1)S(=O)(=O)OCC(F)(F)C(F)(F)C(F)(F)C(F)(F)C(F)(F)F                                                    | -8.07 | 29.73 | 2.71 | P | OUT |
| QL01111 | 1h,1h-nonafluoropentyl p-toluenesulfonate                                              | 883499-79-4  | CC1=CC=C(C=C1)S(=O)(=O)OCC(F)(F)C(F)(F)C(F)(F)C(F)(F)F                                                           | -7.79 | 26.47 | 2.68 | P | OUT |
| QL01112 | 2,2,3,3,4,4,4-Heptafluorobutyl 4-methylbenzene-1-sulfonate                             | 312-66-3     | CC1=CC=C(C=C1)S(=O)(=O)OCC(F)(F)C(F)(F)C(F)(F)F                                                                  | -7.24 | 22.58 | 2.53 | P | OUT |
| QL01113 | 2,2,3,3,3-Pentafluoropropyl 4-methylbenzene-1-sulfonate                                | 565-42-4     | CC1=CC=C(C=C1)S(=O)(=O)OCC(F)(F)C(F)(F)F                                                                         | -6.83 | 17.86 | 2.48 | P | OUT |



|         |                                                                                                                 |              |                                                                                                       |       |       |      |   |     |
|---------|-----------------------------------------------------------------------------------------------------------------|--------------|-------------------------------------------------------------------------------------------------------|-------|-------|------|---|-----|
| QL01114 | 1,3-Diethyl-2-methyl-5-[(perfluorohexyl)sulfonyl]-1H-benzimidazolium 4-methylbenzenesulfonate                   | 76848-68-5   | CC1=CC=C(C=C1)S(O)(=O)=O.CCN1C(C)[NH+](CC)C2=C1C=CC(=C2)S(=O)(=O)C(F)(F)C(F)(F)C(F)(F)C(F)(F)C(F)(F)F | -8.99 | 17.81 | 3.46 | P | OUT |
| QL01115 | 1-Methyl-2-(nonafluorobutyl)benzene                                                                             | 93697-09-7   | CC1=CC=CC=C1C(F)(F)C(F)(F)C(F)(F)C(F)(F)F                                                             | -7.08 | 33.33 | 2.17 | P | IN  |
| QL01116 | (2-methylphenyl) 1,1,2,2,3,3,4,4,4-nonafluorobutane-1-sulfonate                                                 | 42096-33-3   | CC1=CC=CC=C1OS(=O)(=O)C(F)(F)C(F)(F)C(F)(F)C(F)(F)F                                                   | -7.46 | 29.03 | 2.45 | P | OUT |
| QL01117 | 6-Methyl-2-(undecafluoropentyl)-1,3-benzoxazole                                                                 | 93416-26-3   | CC1=CC2=C(C=C1)N=C(O2)C(F)(F)C(F)(F)C(F)(F)C(F)(F)C(F)(F)F                                            | -7.95 | 34.38 | 2.53 | P | IN  |
| QL01118 | (4-Bromophenyl){5-[difluoro(trifluoromethoxy)methyl]-5-hydroxy-3-methyl-4,5-dihydro-1H-pyrazol-1-yl}methanone   | 722470-55-5  | CC1=NN(C(=O)c2ccc(Br)cc2)C(O)(C1)C(F)(F)OC(F)(F)F                                                     | -6.76 | 17.65 | 2.46 | P | OUT |
| QL01119 | Orthobutyric acid, heptafluoro-, cyclic ester with 2-(hydroxymethyl)-2-methyl-1,3-propanediol (11)              | 31185-67-8   | CC12COC(OC1)(OC2)C(F)(F)C(F)(F)C(F)(F)F                                                               | -6.57 | 25.00 | 2.17 | P | OUT |
| QL01120 | 4-(1,1,1,2,3,3,3-Heptafluoropropan-2-yl)-2-methyl-3-(2-methylpropane-2-sulfonyl)benzoic acid                    | 1355554-59-4 | Cc1c(ccc(c1S(=O)(=O)C(C)(C)C)C(F)(C(F)(F)F)C(F)(F)C(O)=O                                              | -5.94 | 16.67 | 2.11 | P | OUT |
| QL01121 | 4-(1,1,1,2,3,3,3-Heptafluoropropan-2-yl)-2-methyl-3-(2-methylpropane-2-sulfinyl)benzoic acid                    | 1355554-39-0 | Cc1c(ccc(c1S(=O)C(C)(C)C)C(F)(C(F)(F)F)C(F)(F)C(O)=O                                                  | -5.97 | 17.07 | 2.12 | P | OUT |
| QL01122 | 4-(1,1,1,2,3,3,3-Heptafluoropropan-2-yl)-3-(methanesulfonyl)-2-methylbenzoic acid                               | 1355554-41-4 | Cc1c(ccc(c1S(C)(=O)=O)C(F)(C(F)(F)F)C(F)(F)C(O)=O                                                     | -6.38 | 21.21 | 2.19 | P | OUT |
| QL01123 | 4-(1,1,1,2,3,3,3-Heptafluoropropan-2-yl)-3-(methanesulfinyl)-2-methylbenzoic acid                               | 1355554-19-6 | Cc1c(ccc(c1S(C)=O)C(F)(C(F)(F)F)C(F)(F)C(O)=O                                                         | -6.43 | 21.88 | 2.19 | P | OUT |
| QL01124 | 3-(tert-Butylsulfonyl)-4-(1,1,1,2,3,3,3-heptafluoropropan-2-yl)-2-methylbenzoic acid                            | 1355554-16-3 | Cc1c(ccc(c1SC(C)(C)C)C(F)(C(F)(F)F)C(F)(F)C(O)=O                                                      | -5.99 | 17.50 | 2.11 | P | OUT |
| QL01125 | 3-Methyl-2-(nonafluorobutyl)-1H-indole                                                                          | 1622133-36-1 | Cc1c(Nc2ccccc12)C(F)(F)C(F)(F)C(F)(F)C(F)(F)F                                                         | -7.00 | 29.03 | 2.25 | P | OUT |
| QL01126 | 2-(Heptafluoropropyl)-3-methyl-1H-indole                                                                        | 1030606-42-8 | Cc1c(Nc2ccccc12)C(F)(F)C(F)(F)C(F)(F)F                                                                | -6.53 | 25.00 | 2.15 | P | OUT |
| QL01127 | 5-Methyl-6-[(3,3,4,4,5,5,6,6,7,7,8,8,8-tridecafluorooctyl)sulfonyl]hexahydro-4,7-methano-2-benzofuran-1,3-dione | 94413-32-8   | CC1C2CC(C1SCCC(F)(F)C(F)(F)C(F)(F)C(F)(F)C(F)(F)C1C2C(=O)OC1=O                                        | -8.24 | 26.00 | 2.89 | P | OUT |
| QL01128 | 6-[[4,6-Dimethylpyrimidin-2-yl)sulfonyl]-3-(heptafluoropropyl)[1,2,4]triazolo[4,3-b]pyridazine                  | 351346-36-6  | Cc1cc(C)nc(Sc2ccc3nnc(n3n2)C(F)(F)C(F)(F)C(F)(F)F)n1                                                  | -7.34 | 18.92 | 2.68 | P | OUT |
| QL01129 | 2-Bromo-4-(1,1,1,2,3,3,3-heptafluoropropan-2-yl)-6-methylaniline                                                | 1770825-71-2 | Cc1cc(cc(Br)c1N)C(F)(C(F)(F)F)C(F)(F)F                                                                | -6.33 | 30.77 | 1.90 | P | IN  |
| QL01130 | 2-Bromo-5-(1,1,1,2,3,3,3-heptafluoropropan-2-yl)-1,3-dimethylbenzene                                            | 353272-55-6  | Cc1cc(cc(C)c1Br)C(F)(C(F)(F)F)C(F)(F)F                                                                | -6.26 | 29.63 | 1.90 | P | IN  |

|         |                                                                                                                      |              |                                                                                    |       |       |      |   |     |
|---------|----------------------------------------------------------------------------------------------------------------------|--------------|------------------------------------------------------------------------------------|-------|-------|------|---|-----|
| QL01131 | 4-(1,1,1,2,3,3,3-Heptafluoropropan-2-yl)-2,6-dimethylbenzaldehyde                                                    | 1771743-29-3 | Cc1cc(cc(C)c1C=O)C(F)(C(F)(F)F)C(F)(F)F                                            | -6.59 | 24.14 | 2.20 | P | OUT |
| QL01132 | 4-(1,1,1,2,3,3,3-Heptafluoropropan-2-yl)-2,6-dimethylaniline                                                         | 273735-43-6  | Cc1cc(cc(C)c1N)C(F)(C(F)(F)F)C(F)(F)F                                              | -5.92 | 24.14 | 1.90 | P | OUT |
| QL01133 | 3-Benzamido-2,6-difluoro-N-[4-(1,1,1,2,3,3,3-heptafluoropropan-2-yl)]-2,6-dimethylphenyl]benzamide                   | 862133-36-6  | Cc1cc(cc(C)c1NC(=O)c1c(F)ccc(NC(=O)c2cccc2)c1F)C(F)(C(F)(F)F)C(F)(F)F              | -8.09 | 16.36 | 3.09 | P | OUT |
| QL01134 | 5-Benzamido-2,4-dibromo-N-[4-(1,1,1,2,3,3,3-heptafluoropropan-2-yl)]-2,6-dimethylphenyl]benzamide                    | 862133-37-7  | Cc1cc(cc(C)c1NC(=O)c1cc(NC(=O)c2cccc2)c(Br)cc1Br)C(F)(C(F)(F)F)C(F)(F)F            | -8.07 | 16.36 | 3.08 | P | OUT |
| QL01135 | 2,4-Difluoro-N-(2-fluoro-5-[[4-(1,1,1,2,3,3,3-heptafluoropropan-2-yl)]-2,6-dimethylphenyl]carbamoyl]phenyl)benzamide | 862133-29-7  | Cc1cc(cc(C)c1NC(=O)c1ccc(F)c(NC(=O)c2ccc(F)cc2F)c1)C(F)(C(F)(F)F)C(F)(F)F          | -8.44 | 18.18 | 3.20 | P | OUT |
| QL01136 | 2,3,4,5,6-Pentafluoro-N-(3-[[4-(1,1,1,2,3,3,3-heptafluoropropan-2-yl)]-2,6-dimethylphenyl]carbamoyl]phenyl)benzamide | 862130-96-9  | Cc1cc(cc(C)c1NC(=O)c1cccc(NC(=O)c2c(F)c(F)c(F)c2F)c1)C(F)(C(F)(F)F)C(F)(F)F        | -8.62 | 21.82 | 3.18 | P | OUT |
| QL01137 | 2,3,6-Trifluoro-N-(3-[[4-(1,1,1,2,3,3,3-heptafluoropropan-2-yl)]-2,6-dimethylphenyl]carbamoyl]phenyl)benzamide       | 862130-95-8  | Cc1cc(cc(C)c1NC(=O)c1cccc(NC(=O)c2c(F)ccc(F)c2F)c1)C(F)(C(F)(F)F)C(F)(F)F          | -8.09 | 18.18 | 3.04 | P | OUT |
| QL01138 | 2,5-Difluoro-N-(3-[[4-(1,1,1,2,3,3,3-heptafluoropropan-2-yl)]-2,6-dimethylphenyl]carbamoyl]phenyl)benzamide          | 862130-67-4  | Cc1cc(cc(C)c1NC(=O)c1cccc(NC(=O)c2cc(F)ccc2F)c1)C(F)(C(F)(F)F)C(F)(F)F             | -8.01 | 16.36 | 3.05 | P | OUT |
| QL01139 | 4-Chloro-N-(3-[[4-(1,1,1,2,3,3,3-heptafluoropropan-2-yl)]-2,6-dimethylphenyl]carbamoyl]phenyl)-2-nitrobenzamide      | 862130-91-4  | Cc1cc(cc(C)c1NC(=O)c1cccc(NC(=O)c2ccc(Cl)cc2[N+]([O-])=O)c1)C(F)(C(F)(F)F)C(F)(F)F | -8.14 | 14.04 | 3.18 | P | OUT |
| QL01140 | 3-(4-Chloro-2-nitrobenzamido)-2-fluoro-N-[4-(1,1,1,2,3,3,3-heptafluoropropan-2-yl)]-2,6-dimethylphenyl]benzamide     | 862133-18-4  | Cc1cc(cc(C)c1NC(=O)c1cccc(NC(=O)c2ccc(Cl)cc2[N+](O-)=O)c1F)C(F)(C(F)(F)F)C(F)(F)F  | -8.25 | 15.79 | 3.18 | P | OUT |
| QL01141 | 2,4-Dichloro-N-(3-[[4-(1,1,1,2,3,3,3-heptafluoropropan-2-yl)]-2,6-dimethylphenyl]carbamoyl]phenyl)benzamide          | 862130-69-6  | Cc1cc(cc(C)c1NC(=O)c1cccc(NC(=O)c2ccc(Cl)cc2Cl)c1)C(F)(C(F)(F)F)C(F)(F)F           | -8.31 | 16.36 | 3.19 | P | OUT |
| QL01142 | 4-Chloro-2-fluoro-N-(3-[[4-(1,1,1,2,3,3,3-heptafluoropropan-2-yl)]-2,6-dimethylphenyl]carbamoyl]phenyl)benzamide     | 862130-90-3  | Cc1cc(cc(C)c1NC(=O)c1cccc(NC(=O)c2ccc(Cl)cc2F)c1)C(F)(C(F)(F)F)C(F)(F)F            | -8.31 | 16.36 | 3.19 | P | OUT |
| QL01143 | 3-(4-Chloro-2-fluorobenzamido)-2-fluoro-N-[4-(1,1,1,2,3,3,3-heptafluoropropan-2-yl)]-2,6-dimethylphenyl]benzamide    | 862133-16-2  | Cc1cc(cc(C)c1NC(=O)c1cccc(NC(=O)c2ccc(Cl)cc2F)c1)C(F)(C(F)(F)F)C(F)(F)F            | -8.42 | 18.18 | 3.19 | P | OUT |
| QL01144 | 2-Fluoro-3-(4-fluoro-2-nitrobenzamido)-N-[4-(1,1,1,2,3,3,3-heptafluoropropan-2-yl)]-2,6-dimethylphenyl]benzamide     | 862133-14-0  | Cc1cc(cc(C)c1NC(=O)c1cccc(NC(=O)c2ccc(F)cc2[N+](O-)=O)c1F)C(F)(C(F)(F)F)C(F)(F)F   | -8.25 | 15.79 | 3.18 | P | OUT |

















|         |                                                                                       |              |                                                                                    |        |       |      |   |     |
|---------|---------------------------------------------------------------------------------------|--------------|------------------------------------------------------------------------------------|--------|-------|------|---|-----|
| QL01293 | 1,1,1,2,2,3,3,4,4,5,5,6-Dodecafluorododec-6-ene                                       | 92610-11-2   | CCCCC=C(F)C(F)(F)C(F)(F)C(F)(F)C(F)(F)F                                            | -8.31  | 33.33 | 2.72 | P | IN  |
| QL01294 | 1,1,1,2,2,3,3,4-Octafluorodec-4-ene                                                   | 90292-32-3   | CCCCC=C(F)C(F)(F)C(F)(F)C(F)(F)F                                                   | -7.33  | 26.67 | 2.46 | P | OUT |
| QL01295 | (6E)-8,8,9,9,10,10,11,11,12,12,13,13,14,14,15,15,15-Heptadecafluoropentadec-6-ene     | 350608-65-0  | CCCCC=CC(F)(F)C(F)(F)C(F)(F)C(F)(F)C(F)(F)C(F)(F)C(F)(F)F                          | -9.10  | 37.78 | 2.95 | P | IN  |
| QL01296 | 8,8,9,9,10,10,11,11,12,12,13,13,14,14,14-Pentadecafluorotetradec-6-ene                | 38787-60-9   | CCCCC=CC(F)(F)C(F)(F)C(F)(F)C(F)(F)C(F)(F)C(F)(F)C(F)(F)F                          | -8.92  | 35.71 | 2.93 | P | IN  |
| QL01297 | (6E)-8,8,9,9,10,10,11,11,12,12,13,13,13-Tridecafluorotridec-6-ene                     | 350608-60-5  | CCCCC=CC(F)(F)C(F)(F)C(F)(F)C(F)(F)C(F)(F)C(F)(F)F                                 | -8.44  | 33.33 | 2.78 | P | IN  |
| QL01298 | 1,1,1,2,2,3,3,4,4-Nonafluoroundec-5-ene                                               | 383145-46-8  | CCCCC=CC(F)(F)C(F)(F)C(F)(F)C(F)(F)F                                               | -7.50  | 27.27 | 2.52 | P | OUT |
| QL01299 | (4E)-1,1,1,2,2,3,3-Heptafluorodec-4-ene                                               | 57325-42-5   | CCCCC=CC(F)(F)C(F)(F)C(F)(F)F                                                      | -7.07  | 23.33 | 2.44 | P | OUT |
| QL01300 | 5-Pentyl-2-[4-(tridecafluorohexyl)phenyl]pyridine                                     | 139030-54-9  | CCCCC1ccc(nc1)-c1ccc(cc1)C(F)(F)C(F)(F)C(F)(F)C(F)(F)C(F)(F)F                      | -9.05  | 24.07 | 3.31 | P | OUT |
| QL01301 | Octan-2-yl heptafluorobutanoate                                                       | 560-01-0     | CCCCC(C)OC(=O)C(F)(F)C(F)(F)C(F)(F)F                                               | -7.35  | 18.42 | 2.70 | P | OUT |
| QL01302 | 1-bromo-1,1,2,2-tetrafluorooctane                                                     | 231630-92-5  | CCCCC(C)(F)C(F)(F)Br                                                               | -6.20  | 19.23 | 2.16 | P | OUT |
| QL01303 | 1,1,1,2,2,3,3,4,4,5,5,6,6,7,7,8,8,9,9,10,10,11,11,12,12-Pentacosafuorooctadecane      | 89109-70-6   | CCCCC(C)(F)C(F)(F)C(F)(F)C(F)(F)C(F)(F)C(F)(F)C(F)(F)C(F)(F)C(F)(F)C(F)(F)C(F)(F)F | -10.14 | 44.64 | 3.23 | P | OUT |
| QL01304 | 1,1,1,2,2,3,3,4,4,5,5,6,6,7,7,8,8,9,9,10,10-Henicosafluorohexadecane                  | 116177-54-9  | CCCCC(C)(F)C(F)(F)C(F)(F)C(F)(F)C(F)(F)C(F)(F)C(F)(F)C(F)(F)C(F)(F)C(F)(F)F        | -9.63  | 42.00 | 3.07 | P | IN  |
| QL01305 | 1,1,1,2,2,3,3,4,4,5,5,6,6,7,7,8,8-Heptadecafluorotetradecane                          | 182130-14-9  | CCCCC(C)(F)C(F)(F)C(F)(F)C(F)(F)C(F)(F)C(F)(F)C(F)(F)C(F)(F)F                      | -9.05  | 38.64 | 2.91 | P | IN  |
| QL01306 | 1,1,1,2,2,3,3,4,4,5,5,6,6,7,7-Pentadecafluorotridecane                                | 169331-74-2  | CCCCC(C)(F)C(F)(F)C(F)(F)C(F)(F)C(F)(F)C(F)(F)C(F)(F)F                             | -8.59  | 36.59 | 2.75 | P | IN  |
| QL01307 | 1,1,1,2,2,3,3,4,4,5,5,6,6-Tridecafluorododecane                                       | 69125-80-0   | CCCCC(C)(F)C(F)(F)C(F)(F)C(F)(F)C(F)(F)C(F)(F)F                                    | -8.38  | 34.21 | 2.72 | P | IN  |
| QL01308 | 1,1,1,2,2,3,3,4,4,5,5-Undecafluoroundecane                                            | 1287702-50-4 | CCCCC(C)(F)C(F)(F)C(F)(F)C(F)(F)C(F)(F)F                                           | -7.82  | 31.43 | 2.55 | P | IN  |
| QL01309 | 1,1,1,2,2,3,3,4,4-Nonafluorodecane                                                    | 1190430-19-3 | CCCCC(C)(F)C(F)(F)C(F)(F)C(F)(F)F                                                  | -7.41  | 28.13 | 2.46 | P | OUT |
| QL01310 | 1,1,1,2,2,3,3-Heptafluorononane                                                       | 755-89-5     | CCCCC(C)(F)C(F)(F)C(F)(F)F                                                         | -6.70  | 24.14 | 2.25 | P | OUT |
| QL01311 | (5E)-1,1,1,2,2,3,3,4,4-Nonafluoro-6-iodododec-5-ene                                   | 109574-88-1  | CCCCC(I)=C/C(F)(F)C(F)(F)C(F)(F)C(F)(F)F                                           | -7.92  | 27.78 | 2.70 | P | OUT |
| QL01312 | 1,1,1,2,2,3,3,4,4,5,5,6,6,7,7,8,8,9,9,10,10,11,11,12,12-Pentacosafuoro-14-iodoicosane | 93454-69-4   | CCCCC(I)CC(F)(F)C(F)(F)C(F)(F)C(F)(F)C(F)(F)C(F)(F)C(F)(F)C(F)(F)C(F)(F)C(F)(F)F   | -10.31 | 41.94 | 3.38 | P | OUT |
| QL01313 | 1,1,1,2,2,3,3,4,4,5,5,6,6,7,7,8,8,9,9,10,10-Henicosafuoro-12-iodooctadecane           | 129838-40-0  | CCCCC(I)CC(F)(F)C(F)(F)C(F)(F)C(F)(F)C(F)(F)C(F)(F)C(F)(F)C(F)(F)C(F)(F)F          | -9.84  | 39.29 | 3.24 | P | IN  |
| QL01314 | 1,1,1,2,2,3,3,4,4,5,5,6,6,7,7,8,8-Heptadecafluoro-10-iodohexadecane                   | 96791-81-0   | CCCCC(I)CC(F)(F)C(F)(F)C(F)(F)C(F)(F)C(F)(F)C(F)(F)C(F)(F)F                        | -9.32  | 36.00 | 3.10 | P | OUT |
| QL01315 | 1,1,1,2,2,3,3,4,4,5,5,6,6,7,7-Pentadecafluoro-9-iodopentadecane                       | 918-32-1     | CCCCC(I)CC(F)(F)C(F)(F)C(F)(F)C(F)(F)C(F)(F)C(F)(F)F                               | -8.90  | 34.04 | 2.97 | P | OUT |
| QL01316 | 1,1,1,2,2,3,3,4,4,5,5,6,6-Tridecafluoro-8-iodotetradecane                             | 109574-84-7  | CCCCC(I)CC(F)(F)C(F)(F)C(F)(F)C(F)(F)C(F)(F)C(F)(F)F                               | -8.60  | 31.82 | 2.89 | P | OUT |



[illegible]

|         |                                                                                                                     |              |                                                                                   |        |       |      |   |     |
|---------|---------------------------------------------------------------------------------------------------------------------|--------------|-----------------------------------------------------------------------------------|--------|-------|------|---|-----|
| QL01366 | 1,1,1,2,2,3,3,4,4-Nonafluoro-6-iodohexadecane (9E)-                                                                 | 1789721-11-4 | CCCCCCCCCCC(I)CC(F)(F)C(F)(F)C(F)(F)F                                             | -8.24  | 20.00 | 3.06 | P | OUT |
| QL01367 | 1,1,1,2,2,3,3,4,4,5,5,6,6,7,7,8-Heptadecafluoroicos-9-ene (7E)-1,1,1,2,2,3,3,4,4,5,5,6,6-Tridecafluorooctadec-7-ene | 124921-25-1  | CCCCCCCCCCC=CC(F)(F)C(F)(F)C(F)(F)C(F)(F)C(F)(F)C(F)(F)F                          | -9.45  | 28.33 | 3.37 | P | OUT |
| QL01368 | 1,1,1,2,2,3,3,4,4-Nonafluorohexadec-5-ene                                                                           | 125081-49-4  | CCCCCCCCCCC=CC(F)(F)C(F)(F)C(F)(F)C(F)(F)C(F)(F)F                                 | -8.83  | 24.07 | 3.21 | P | OUT |
| QL01369 | 1,1,1,2,2,3,3,4,4,5,5,6,6,7,7,8,8,9,9,10,10,11,11,12,12-Pentacosafuorotricosane                                     | 131851-20-2  | CCCCCCCCCCC=CC(F)(F)C(F)(F)C(F)(F)C(F)(F)F                                        | -8.13  | 18.75 | 3.04 | P | OUT |
| QL01370 |                                                                                                                     | 677324-31-1  | CCCCCCCCCCC(F)(F)C(F)(F)C(F)(F)C(F)(F)C(F)(F)C(F)(F)C(F)(F)C(F)(F)C(F)(F)C(F)(F)F | -10.28 | 35.21 | 3.55 | P | OUT |
| QL01371 | 1,1,1,2,2,3,3,4,4,5,5,6,6,7,7,8,8,9,9,10,10-Henicosafuorohenicosane                                                 | 125635-86-1  | CCCCCCCCCCC(F)(F)C(F)(F)C(F)(F)C(F)(F)C(F)(F)C(F)(F)C(F)(F)C(F)(F)C(F)(F)F        | -9.85  | 32.31 | 3.44 | P | OUT |
| QL01372 | 1,1,1,2,2,3,3,4,4,5,5,6,6,7,7,8-Heptadecafluorononadecane                                                           | 931415-53-1  | CCCCCCCCCCC(F)(F)C(F)(F)C(F)(F)C(F)(F)C(F)(F)C(F)(F)C(F)(F)F                      | -9.28  | 28.81 | 3.28 | P | OUT |
| QL01373 | Tetradecanoic acid, 1,1'-(methyl(3,3,4,4,5,5,6,6,6-nonafluoroheptyl)silylene) ester                                 | 94094-26-5   | CCCCCCCCCCCCC(C(=O)=O)[Si](C)(CCC(F)(F)C(F)(F)C(F)(F)C(F)(F)C(CCCCCCCCCC)C(=O)=O  | -8.76  | 8.18  | 3.62 | P | OUT |
| QL01374 | 1,1,1,2,2,3,3,4,4,5,5,6,6,7,7,8,8,9,9,10,10,11,11,12,12,13,13-Heptacosafuoropentacosane                             | 677324-22-0  | CCCCCCCCCCC(F)(F)C(F)(F)C(F)(F)C(F)(F)C(F)(F)C(F)(F)C(F)(F)C(F)(F)C(F)(F)C(F)(F)F | -10.53 | 35.06 | 3.67 | P | OUT |
| QL01375 | 1,1,1,2,2,3,3,4,4,5,5,6,6,7,7,8,8,9,9,10,10,11,11,12,12-Pentacosafuorotetracosane                                   | 89109-71-7   | CCCCCCCCCCC(F)(F)C(F)(F)C(F)(F)C(F)(F)C(F)(F)C(F)(F)C(F)(F)C(F)(F)C(F)(F)F        | -10.42 | 33.78 | 3.66 | P | OUT |
| QL01376 | 1,1,1,2,2,3,3,4,4,5,5,6,6,7,7,8,8,9,9,10,10,11,11-Tricosafuorotricosane                                             | 677324-21-9  | CCCCCCCCCCC(F)(F)C(F)(F)C(F)(F)C(F)(F)C(F)(F)C(F)(F)C(F)(F)C(F)(F)C(F)(F)F        | -10.14 | 32.39 | 3.57 | P | OUT |
| QL01377 | 1,1,1,2,2,3,3,4,4,5,5,6,6,7,7,8,8,9,9,10,10-Henicosafuorodocosane                                                   | 93454-71-8   | CCCCCCCCCCC(F)(F)C(F)(F)C(F)(F)C(F)(F)C(F)(F)C(F)(F)C(F)(F)C(F)(F)C(F)(F)F        | -9.94  | 30.88 | 3.52 | P | OUT |
| QL01378 | 1,1,1,2,2,3,3,4,4,5,5,6,6,7,7,8,8,9,9-Nonadecafluorohenicosane                                                      | 677324-20-8  | CCCCCCCCCCC(F)(F)C(F)(F)C(F)(F)C(F)(F)C(F)(F)C(F)(F)C(F)(F)C(F)(F)F               | -9.62  | 29.23 | 3.42 | P | OUT |
| QL01379 | 1-(Perfluoro-n-octyl)dodecane                                                                                       | 106873-67-0  | CCCCCCCCCCC(F)(F)C(F)(F)C(F)(F)C(F)(F)C(F)(F)C(F)(F)C(F)(F)F                      | -9.39  | 27.42 | 3.37 | P | OUT |
| QL01380 | 1,1,1,2,2,3,3,4,4,5,5,6,6,7,7-Pentadecafluorononadecane                                                             | 109856-51-1  | CCCCCCCCCCC(F)(F)C(F)(F)C(F)(F)C(F)(F)C(F)(F)C(F)(F)F                             | -9.03  | 25.42 | 3.26 | P | OUT |
| QL01381 | 1-(Perfluoro-n-hexyl)dodecane                                                                                       | 90499-30-2   | CCCCCCCCCCC(F)(F)C(F)(F)C(F)(F)C(F)(F)C(F)(F)F                                    | -8.78  | 23.21 | 3.21 | P | OUT |
| QL01382 | 1,1,1,2,2,3,3,4,4-Nonafluorohexadecane                                                                              | 106873-68-1  | CCCCCCCCCCC(F)(F)C(F)(F)C(F)(F)F                                                  | -8.08  | 18.00 | 3.04 | P | OUT |
| QL01383 | 1,1,1,2,2,3,3-Heptafluoropentadecane                                                                                | 106873-69-2  | CCCCCCCCCCC(F)(F)C(F)(F)C(F)(F)F                                                  | -7.60  | 14.89 | 2.91 | P | OUT |
| QL01384 | 1,1,1,2,2,3,3,4,4,5,5,6,6,7,7,8,8,9,9,10,10-Henicosafuoro-12-iodotetracosane                                        | 1257261-92-9 | CCCCCCCCCCC(I)CC(F)(F)C(F)(F)C(F)(F)C(F)(F)C(F)(F)C(F)(F)C(F)(F)C(F)(F)F          | -10.13 | 29.73 | 3.64 | P | OUT |
| QL01385 | 1,1,1,2,2,3,3,4,4,5,5,6,6,7,7,8,8-Heptadecafluoro-10-iododocosane                                                   | 176979-18-3  | CCCCCCCCCCC(I)CC(F)(F)C(F)(F)C(F)(F)C(F)(F)C(F)(F)C(F)(F)C(F)(F)F                 | -9.63  | 26.47 | 3.50 | P | OUT |
| QL01386 | 2-(o-Cyanophenoxy)-3'-hydroxy-4'-(perfluorobutyl)aminotetradecanilide                                               | 117844-18-5  | CCCCCCCCCCC(OC1=CC=CC=C1#N)C(O)=N/C1=CC(O)=C(NC(=O)C(F)(F)C(F)(F)C(F)(F)C=C1      | -8.73  | 8.64  | 3.59 | P | OUT |
| QL01387 | 1,1,1,2,2,3,3,4,4,5,5,6,6,7,7,8-Heptadecafluorodocos-9-ene                                                          | 118642-84-5  | CCCCCCCCCCC=CC(F)(F)C(F)(F)C(F)(F)C(F)(F)C(F)(F)C(F)(F)C(F)(F)F                   | -9.56  | 25.76 | 3.49 | P | OUT |
| QL01388 | 1,1,1,2,2,3,3,4,4,5,5,6,6-Tridecafluoroicos-7-ene                                                                   | 160460-04-8  | CCCCCCCCCCC=CC(F)(F)C(F)(F)C(F)(F)C(F)(F)C(F)(F)C(F)(F)F                          | -8.99  | 21.67 | 3.35 | P | OUT |
| QL01389 | 1,1,1,2,2,3,3,4,4-Nonafluorooctadec-5-ene                                                                           | 160460-03-7  | CCCCCCCCCCC=CC(F)(F)C(F)(F)C(F)(F)C(F)(F)F                                        | -8.35  | 16.67 | 3.20 | P | OUT |
| QL01390 | 1,1,1,2,2,3,3,4,4,5,5,6,6,7,7,8,8,9,9,10,10,11,11,12,12-Pentacosafuoropentacosane                                   | 116177-47-0  | CCCCCCCCCCC(F)(F)C(F)(F)C(F)(F)C(F)(F)C(F)(F)C(F)(F)C(F)(F)C(F)(F)C(F)(F)C(F)(F)F | -10.40 | 32.47 | 3.68 | P | OUT |



[illegible]







|         |                                                                                                                                                 |              |                                                                                                                                            |       |       |      |   |     |
|---------|-------------------------------------------------------------------------------------------------------------------------------------------------|--------------|--------------------------------------------------------------------------------------------------------------------------------------------|-------|-------|------|---|-----|
| QL01487 | Butyl pentadecafluorooctanoate                                                                                                                  | 307-96-0     | CCCCOC(=O)C(F)(F)C(F)(F)C(F)(F)C(F)(F)C(F)(F)C(F)(F)F                                                                                      | -8.76 | 39.47 | 2.75 | P | IN  |
| QL01488 | Butyl heptafluorobutanoate                                                                                                                      | 1559-07-5    | CCCCOC(=O)C(F)(F)C(F)(F)C(F)(F)F                                                                                                           | -6.94 | 26.92 | 2.28 | P | OUT |
| QL01489 | Butyl 2,3,3,3-tetrafluoro-2-(heptafluoropropoxy)propanoate                                                                                      | 147224-18-8  | CCCCOC(=O)C(F)(OC(F)(F)C(F)(F)C(F)(F)F)C(F)(F)F                                                                                            | -7.90 | 33.33 | 2.53 | P | IN  |
| QL01490 | Butyl 2,3,3,3-tetrafluoro-2-[1,1,2,3,3,3-hexafluoro-2-(heptafluoropropoxy)propoxy]propanoate                                                    | 145510-89-0  | CCCCOC(=O)C(F)(OC(F)(F)C(F)(F)C(F)(F)C(F)(F)F)C(F)(F)C(F)(F)F                                                                              | -8.92 | 39.53 | 2.82 | P | IN  |
| QL01492 | N-(Perfluoro-1-oxobutyl)aspartic acid 1-butyl ester                                                                                             | 88434-83-7   | CCCCOC(O)[C@H](CC(O)=O)NC(=O)C(F)(F)C(F)(F)C(F)(F)F                                                                                        | -7.28 | 17.07 | 2.71 | P | OUT |
| QL01493 | 1-(2-(2-Butoxyethoxy)ethoxy)3-(perfluorooctyl)propan-2-ol                                                                                       | 94158-61-9   | CCCCOCCOCCOCC(O)CC(F)(F)C(F)(F)C(F)(F)C(F)(F)C(F)(F)C(F)(F)F                                                                               | -9.66 | 26.98 | 3.50 | P | OUT |
| QL01494 | Phosphinic acid, dibutyl-, 4-(2,2,3,3,4,4,4-heptafluorobutyl)phenyl ester                                                                       | 7526-47-8    | CCCCP(=O)(CCCC)OC1=CC=C(CC(F)(F)C(F)(F)C(F)(F)C(F)(F)C=C1                                                                                  | -7.47 | 13.46 | 2.89 | P | OUT |
| QL01495 | 3-(Butane-1-sulfonyl)-4-(1,1,1,2,3,3,3-heptafluoropropan-2-yl)-2-methylbenzoic acid                                                             | 1355554-53-8 | CCCCS(=O)(=O)c1c(C)c(ccc1C(F)(C(F)(F)F)C(F)(F)F)C(O)=O                                                                                     | -6.11 | 16.67 | 2.19 | P | OUT |
| QL01496 | 3-(Butane-1-sulfonyl)-2-ethyl-4-(1,1,1,2,3,3,3-heptafluoropropan-2-yl)benzoic acid                                                              | 1355555-19-9 | CCCCS(=O)(=O)c1c(CC)c(ccc1C(F)(C(F)(F)F)C(F)(F)F)C(O)=O                                                                                    | -6.03 | 15.56 | 2.19 | P | OUT |
| QL01497 | 3-(Butane-1-sulfinyl)-4-(1,1,1,2,3,3,3-heptafluoropropan-2-yl)-2-methylbenzoic acid                                                             | 1355554-30-1 | CCCCS(=O)c1c(C)c(ccc1C(F)(C(F)(F)F)C(F)(F)F)C(O)=O                                                                                         | -6.10 | 17.07 | 2.18 | P | OUT |
| QL01498 | 3-(Butane-1-sulfinyl)-2-ethyl-4-(1,1,1,2,3,3,3-heptafluoropropan-2-yl)benzoic acid                                                              | 1355554-97-0 | CCCCS(=O)c1c(CC)c(ccc1C(F)(C(F)(F)F)C(F)(F)F)C(O)=O                                                                                        | -6.02 | 15.91 | 2.17 | P | OUT |
| QL01499 | 3-(Butylsulfonyl)-4-(1,1,1,2,3,3,3-heptafluoropropan-2-yl)-2-methylbenzoic acid                                                                 | 1355554-07-2 | CCCCSc1c(C)c(ccc1C(F)(C(F)(F)F)C(F)(F)F)C(O)=O                                                                                             | -6.06 | 17.50 | 2.15 | P | OUT |
| QL01500 | 3-(Butylsulfonyl)-2-ethyl-4-(1,1,1,2,3,3,3-heptafluoropropan-2-yl)benzoic acid                                                                  | 1355554-72-1 | CCCCSc1c(CC)c(ccc1C(F)(C(F)(F)F)C(F)(F)F)C(O)=O                                                                                            | -5.97 | 16.28 | 2.14 | P | OUT |
| QL01501 | 1-(Butylsulfonyl)-3,4,4,5,5,6,6,6-octafluorohex-2-ene                                                                                           | 90292-35-6   | CCCCSCC=C(F)C(F)(F)C(F)(F)C(F)(F)F                                                                                                         | -7.41 | 25.81 | 2.52 | P | OUT |
| QL01502 | N-[[Heptadecafluorooctyl)sulfonyl]-N-propylglycine                                                                                              | 66551-19-7   | CCCN(CC(O)=O)S(=O)(=O)C(F)(F)C(F)(F)C(F)(F)C(F)(F)C(F)(F)C(F)(F)C(F)(F)F.CCCN(CC(O)=O)S(=O)(=O)C(F)(F)C(F)(F)C(F)(F)C(F)(F)C(F)(F)C(F)(F)F | -8.59 | 36.96 | 2.75 | P | IN  |
| QL01503 | N-(2,3-Dihydroxypropyl)-1,1,2,2,3,3,4,4,5,5,6,6,7,7,8,8,8-heptadecafluoro-N-propyloctane-1-sulfonamide                                          | 2262-49-9    | CCCN(CC(O)CO)S(=O)(=O)C(F)(F)C(F)(F)C(F)(F)C(F)(F)C(F)(F)C(F)(F)C(F)(F)F                                                                   | -8.69 | 33.33 | 2.89 | P | OUT |
| QL01504 | 1,1,2,2,3,3,4,4,5,5,6,6,7,7,8,8,8-Heptadecafluoro-N-[[oxiran-2-yl)methyl]-N-propyloctane-1-sulfonamide                                          | 77620-64-5   | CCCN(CC1CO1)S(=O)(=O)C(F)(F)C(F)(F)C(F)(F)C(F)(F)C(F)(F)C(F)(F)C(F)(F)F                                                                    | -8.50 | 35.42 | 2.75 | P | IN  |
| QL01505 | Poly(oxy-1,2-ethanediy), .alpha.-[2-[[[(perfluorooctyl)sulfonyl]propylamino]ethyl]-.omega.-hydroxy-2,2,3,3,4,4,4-Heptafluoro-N-propylbutanamide | 52550-45-5   | CCCN(CCOCCO)S(=O)(=O)C(F)(F)C(F)(F)C(F)(F)C(F)(F)C(F)(F)C(F)(F)C(F)(F)F                                                                    | -9.00 | 31.48 | 3.08 | P | OUT |
| QL01506 |                                                                                                                                                 | 75668-24-5   | CCCN(C=O)C(F)(F)C(F)(F)C(F)(F)F                                                                                                            | -6.91 | 29.17 | 2.20 | P | OUT |

|         |                                                                                                                                                                                                             |              |                                                                          |       |       |      |   |     |
|---------|-------------------------------------------------------------------------------------------------------------------------------------------------------------------------------------------------------------|--------------|--------------------------------------------------------------------------|-------|-------|------|---|-----|
| QL01507 | 2,3,3,3-Tetrafluoro-2-(heptafluoropropoxy)propanoic acid--N-propylpropan-1-amine (1/1)                                                                                                                      | 165951-17-7  | CCCNCCC.OC(=O)C(F)(OC(F)(F)C(F)(F)C(F)(F)C(F)(F)F                        | -6.47 | 25.58 | 2.11 | P | OUT |
| QL01508 | 4,5,5,5-Tetrafluoro-4-(1,1,2,3,3,3-hexafluoro-2-[1,1,2,3,3,3-hexafluoro-2-(heptafluoropropoxy)propoxy]-N-propylpentan-1-amine (3,3,4,4,5,5,6,6,7,7,8,8,9,9,10,10,10-Heptadecafluorodecyl)(tripropoxy)silane | 928655-42-9  | CCCNCCCC(F)(OC(F)(F)C(F)(OC(F)(F)C(F)(F)C(F)(F)C(F)(F)C(F)(F)C(F)(F)F    | -9.79 | 39.66 | 3.21 | P | IN  |
| QL01509 |                                                                                                                                                                                                             | 521084-64-0  | CCCC[Si](CCC(F)(F)C(F)(F)C(F)(F)C(F)(F)C(F)(F)C(F)(F)C(F)(F)F)(OCCC)OCCC | -8.34 | 26.15 | 2.93 | P | OUT |
| QL01510 | N-(Perfluoro-1-oxobutyl)aspartic acid 1-propyl ester                                                                                                                                                        | 88436-09-3   | CCCOC(=O)[C@H](CC(O)=O)NC(=O)C(F)(F)C(F)(F)C(F)(F)F                      | -6.98 | 19.44 | 2.51 | P | OUT |
| QL01511 | Propyl heptadecafluorononanoate                                                                                                                                                                             | 99156-01-1   | CCCOC(=O)C(F)(F)C(F)(F)C(F)(F)C(F)(F)C(F)(F)C(F)(F)C(F)(F)F              | -9.06 | 44.74 | 2.74 | P | IN  |
| QL01512 | Heptanoic acid, tridecafluoro-, propyl ester                                                                                                                                                                | 134638-94-1  | CCCOC(=O)C(F)(F)C(F)(F)C(F)(F)C(F)(F)C(F)(F)C(F)(F)F                     | -8.32 | 40.63 | 2.52 | P | IN  |
| QL01513 | Propyl 2,3,3,3-tetrafluoro-2-(heptafluoropropoxy)propanoate                                                                                                                                                 | 147224-16-6  | CCCOC(=O)C(F)(OC(F)(F)C(F)(F)C(F)(F)C(F)(F)F                             | -7.94 | 36.67 | 2.46 | P | IN  |
| QL01514 | Propyl 2,3,3,3-tetrafluoro-2-[1,1,2,3,3,3-hexafluoro-2-(heptafluoropropoxy)propoxy]propanoate                                                                                                               | 145510-87-8  | CCCOC(=O)C(F)(OC(F)(F)C(F)(OC(F)(F)C(F)(F)C(F)(F)C(F)(F)C(F)(F)F         | -8.79 | 42.50 | 2.68 | P | IN  |
| QL01515 | 1,1,1,2,2,3,3,4,4-Nonafluoro-4-propoxybutane                                                                                                                                                                | 72372-80-6   | CCCOC(F)(F)C(F)(F)C(F)(F)C(F)(F)F                                        | -7.43 | 37.50 | 2.21 | P | IN  |
| QL01516 | 1,1,1,2,2,3,3,4,4,5,5,6,6-Tridecafluoro-8-propoxyoctane                                                                                                                                                     | 1193010-01-3 | CCCCCCCC(F)(F)C(F)(F)C(F)(F)C(F)(F)C(F)(F)C(F)(F)F                       | -8.49 | 36.11 | 2.72 | P | IN  |
| QL01517 | 1,1,1,2,2,3,3,4,4-Nonafluoro-6-propoxyhexane                                                                                                                                                                | 1193009-98-1 | CCCCCCC(F)(F)C(F)(F)C(F)(F)C(F)(F)F                                      | -7.53 | 30.00 | 2.46 | P | OUT |
| QL01518 | 4-(1,1,1,2,3,3,3-Heptafluoropropan-2-yl)-2-methyl-3-(propane-1-sulfonyl)benzoic acid                                                                                                                        | 1355554-46-9 | CCCS(=O)(=O)c1c(C)c(ccc1C(F)(C(F)(F)F)C(F)(F)F)C(O)=O                    | -5.91 | 17.95 | 2.07 | P | OUT |
| QL01519 | 2-Ethyl-4-(1,1,1,2,3,3,3-heptafluoropropan-2-yl)-3-(propane-1-sulfonyl)benzoic acid                                                                                                                         | 1355555-13-3 | CCCS(=O)(=O)c1c(CC)c(ccc1C(F)(C(F)(F)F)C(F)(F)F)C(O)=O                   | -5.83 | 16.67 | 2.07 | P | OUT |
| QL01520 | 4-(1,1,1,2,3,3,3-Heptafluoropropan-2-yl)-2-methyl-3-(propane-1-sulfonyl)benzoic acid                                                                                                                        | 1355554-25-4 | CCCS(=O)c1c(C)c(ccc1C(F)(C(F)(F)F)C(F)(F)F)C(O)=O                        | -5.95 | 18.42 | 2.07 | P | OUT |
| QL01521 | 2-Ethyl-4-(1,1,1,2,3,3,3-heptafluoropropan-2-yl)-3-(propane-1-sulfonyl)benzoic acid                                                                                                                         | 1355554-90-3 | CCCS(=O)c1c(CC)c(ccc1C(F)(C(F)(F)F)C(F)(F)F)C(O)=O                       | -5.86 | 17.07 | 2.07 | P | OUT |
| QL01522 | 4-(1,1,1,2,3,3,3-Heptafluoropropan-2-yl)-2-methyl-3-(propylsulfonyl)benzoic acid                                                                                                                            | 1355554-03-8 | CCCScc1c(C)c(ccc1C(F)(C(F)(F)F)C(F)(F)F)C(O)=O                           | -5.98 | 18.92 | 2.07 | P | OUT |
| QL01523 | 2-Ethyl-4-(1,1,1,2,3,3,3-heptafluoropropan-2-yl)-3-(propylsulfonyl)benzoic acid                                                                                                                             | 1355554-68-5 | CCCScc1c(CC)c(ccc1C(F)(C(F)(F)F)C(F)(F)F)C(O)=O                          | -5.87 | 17.50 | 2.06 | P | OUT |
| QL01524 | Hexanoic acid, 2,2,3,3,4,4,5,6,6-decafluoro-5-(trifluoromethyl)-, compd. with ethanamine (11)                                                                                                               | 68015-84-9   | CCN.OC(=O)C(F)(F)C(F)(F)C(F)(F)C(F)(F)C(F)(F)C(F)(F)F                    | -7.72 | 39.39 | 2.28 | P | IN  |

|         |                                                                                                                                                            |              |                                                                                                     |       |       |      |   |     |
|---------|------------------------------------------------------------------------------------------------------------------------------------------------------------|--------------|-----------------------------------------------------------------------------------------------------|-------|-------|------|---|-----|
| QL01525 | Perfluoro-7-(trifluoromethyl)octanoic acid ethanamine                                                                                                      | 68015-86-1   | CCN.OC(=O)C(F)(F)C(F)(F)C(F)(F)C(F)(F)C(F)(F)C(F)(F)C(F)(F)F                                        | -8.57 | 43.59 | 2.55 | P | IN  |
| QL01526 | Ethanaminium perfluoro-9-methyldecanoate                                                                                                                   | 68015-85-0   | CCN.OC(=O)C(F)(F)C(F)(F)C(F)(F)C(F)(F)C(F)(F)C(F)(F)C(F)(F)C(F)(F)F                                 | -9.26 | 46.67 | 2.78 | P | IN  |
| QL01527 | (Ethyl{3-[(1,1,2,2,3,3,4,4,5,5,6,6-tridecafluorohexane-1-sulfonyl)amino]propyl}amino)oxid anide                                                            | 30295-56-8   | CCN([O-])CCCNS(=O)(=O)C(F)(F)C(F)(F)C(F)(F)C(F)(F)C(F)(F)C(F)(F)F                                   | -8.61 | 30.95 | 2.92 | P | OUT |
| QL01528 | N-Ethyl-1,1,2,2,3,3,4,4,5,5,6,6-tridecafluoro-N-methylhexane-1-sulfonamide                                                                                 | 1427176-17-7 | CCN(C)S(=O)(=O)C(F)(F)C(F)(F)C(F)(F)C(F)(F)C(F)(F)C(F)(F)F                                          | -8.01 | 38.24 | 2.45 | P | IN  |
| QL01529 | N-Ethyl-1,1,2,2,3,3,4,4,4-nonafluoro-N-methylbutane-1-sulfonamide                                                                                          | 1427176-16-6 | CCN(C)S(=O)(=O)C(F)(F)C(F)(F)C(F)(F)C(F)(F)F                                                        | -7.01 | 32.14 | 2.17 | P | IN  |
| QL01530 | N-Ethyl-N-[(heptadecafluorooctyl)sulfonyl]glycine methyl ester                                                                                             | 87988-69-0   | CCN(CC(=O)OC)S(=O)(=O)C(F)(F)C(F)(F)C(F)(F)C(F)(F)C(F)(F)C(F)(F)C(F)(F)F                            | -8.93 | 36.96 | 2.90 | P | IN  |
| QL01531 | N,N-Diethyl-2,2,3,3,4,4,5,5,6,6,7,7,8,8,9,9,9-heptadecafluorononanamide                                                                                    | 90403-88-6   | CCN(CC)C(=O)C(F)(F)C(F)(F)C(F)(F)C(F)(F)C(F)(F)C(F)(F)C(F)(F)C(F)(F)F                               | -8.69 | 40.48 | 2.69 | P | IN  |
| QL01532 | Heptanamide, N,N-diethyl-2,2,3,3,4,4,5,5,6,6,7,7,7-tridecafluoro-                                                                                          | 61881-15-0   | CCN(CC)C(=O)C(F)(F)C(F)(F)C(F)(F)C(F)(F)C(F)(F)C(F)(F)F                                             | -7.90 | 36.11 | 2.46 | P | IN  |
| QL01533 | N,N-Diethyl-2,2,3,3,4,4,5,5-nonafluoropentanamide                                                                                                          | 158018-94-1  | CCN(CC)C(=O)C(F)(F)C(F)(F)C(F)(F)C(F)(F)F                                                           | -6.91 | 30.00 | 2.18 | P | IN  |
| QL01534 | N,N-Diethyl-2,2,3,3,4,4,4-heptafluorobutanamide                                                                                                            | 377-58-2     | CCN(CC)C(=O)C(F)(F)C(F)(F)C(F)(F)F                                                                  | -6.08 | 25.93 | 1.92 | P | OUT |
| QL01535 | N,N-Diethyl-2,3,3,3-tetrafluoro-2-(heptafluoropropoxy)propanamide                                                                                          | 176702-71-9  | CCN(CC)C(=O)C(F)(OC(F)(F)C(F)(F)C(F)(F)C(F)(F)F                                                     | -7.10 | 32.35 | 2.20 | P | IN  |
| QL01536 | N,N-Diethyl-2,3,3,3-tetrafluoro-2-[1,1,2,3,3-hexafluoro-2-(heptafluoropropoxy)propoxy]propanamide                                                          | 176702-74-2  | CCN(CC)C(=O)C(F)(OC(F)(F)C(F)(OC(F)(F)C(F)(F)C(F)(F)C(F)(F)C(F)(F)F                                 | -8.48 | 38.64 | 2.65 | P | IN  |
| QL01537 | N,N-Diethyl-2H-perfluoropropanamine                                                                                                                        | 309-88-6     | CCN(CC)C(F)(F)C(F)C(F)(F)F                                                                          | -5.77 | 24.00 | 1.84 | P | OUT |
| QL01538 | Heptadecafluorooctane-1-sulphonamide, compound with triethylamine (11)                                                                                     | 76752-82-4   | CCN(CC)CC.NS(=O)(=O)C(F)(F)C(F)(F)C(F)(F)C(F)(F)C(F)(F)C(F)(F)C(F)(F)F                              | -8.77 | 32.08 | 2.96 | P | OUT |
| QL01539 | N,N-Diethyl-1,1,2,2,3,3,4,4,5,5,6,6-tridecafluorohexane-1-sulfonamide                                                                                      | 1270179-93-5 | CCN(CC)S(=O)(=O)C(F)(F)C(F)(F)C(F)(F)C(F)(F)C(F)(F)C(F)(F)C(F)(F)F                                  | -7.82 | 35.14 | 2.45 | P | IN  |
| QL01540 | N-ethyl-N-[3-(trichlorosilyl)propyl]perfluorooctanesulfonamide                                                                                             | 67939-42-8   | CCN(CCC[Si](Cl)(Cl)Cl)S(=O)(=O)C(F)(F)C(F)(F)C(F)(F)C(F)(F)C(F)(F)C(F)(F)C(F)(F)F                   | -9.26 | 40.82 | 2.94 | P | IN  |
| QL01541 | N-Ethyl-N-[3-(trimethoxysilyl)propyl]perfluorooctanesulfonamide                                                                                            | 61660-12-6   | CCN(CCC[Si](OC)(OC)OC)S(=O)(=O)C(F)(F)C(F)(F)C(F)(F)C(F)(F)C(F)(F)C(F)(F)C(F)(F)F                   | -8.75 | 27.87 | 3.07 | P | OUT |
| QL01542 | N-Ethyl-1,1,2,2,3,3,4,4,5,5,6,6,7,7,8,8,8-heptadecafluoro-N-{11-[2-(2-methoxyethoxy)ethoxy]ethyl}-2,5,8-trioxo-11-azatetradecan-14-yl)octane-1-sulfonamide | 117413-27-1  | CCN(CCCN(CCOCCOCCOCC)CCOCCOCCOCC)S(=O)(=O)C(F)(F)C(F)(F)C(F)(F)C(F)(F)C(F)(F)C(F)(F)C(F)(F)C(F)(F)F | -9.28 | 17.71 | 3.59 | P | OUT |
| QL01543 | N-Ethyl-N-(2-hydroxyethyl)perfluoroheptanesulfonamide                                                                                                      | 68555-73-7   | CCN(CCO)S(=O)(=O)C(F)(F)C(F)(F)C(F)(F)C(F)(F)C(F)(F)C(F)(F)F                                        | -8.44 | 36.59 | 2.69 | P | IN  |





|         |                                                                                               |              |                                                                                              |       |       |      |   |     |
|---------|-----------------------------------------------------------------------------------------------|--------------|----------------------------------------------------------------------------------------------|-------|-------|------|---|-----|
| QL01591 | Ethyl 3,3,4,4,5,5,6,6,7,7,8,8,9,9,10,10,10-heptafluorodecanoate                               | 1401315-53-4 | CCOC(=O)C(O)(O)C(F)(F)C(F)(F)C(F)(F)C(F)(F)C(F)(F)C(F)(F)C(F)(F)F                            | -8.92 | 42.50 | 2.74 | P | IN  |
| QL01592 | Ethyl 3-amino-4,4,5,5,6,6,6-heptafluorohex-2-enoate                                           | 87613-26-1   | CCOC(=O)C=C(N)C(F)(F)C(F)(F)C(F)(F)F                                                         | -6.90 | 26.92 | 2.26 | P | OUT |
| QL01593 | Ethyl (2E)-4,4,5,5,6,6,6-heptafluorohex-2-enoate                                              | 37759-79-8   | CCOC(=O)C=CC(F)(F)C(F)(F)C(F)(F)F                                                            | -6.96 | 29.17 | 2.23 | P | OUT |
| QL01594 | Ethyl (2E)-3-(1,1,2,2,3,3,4,4,4-nonafluorobutane-1-sulfinyl)prop-2-enoate                     | 1606997-39-0 | CCOC(=O)C=CS(=O)C(F)(F)C(F)(F)C(F)(F)C(F)(F)F                                                | -7.76 | 31.03 | 2.53 | P | IN  |
| QL01595 | Ethyl 6-(nonafluorobutyl)-4-phenyl-2-sulfanylidene-1,2,3,4-tetrahydropyrimidine-5-carboxylate | 281189-83-1  | CCOC(=O)C1=C(NC(=S)NC1c1cccc1)C(F)(F)C(F)(F)C(F)(F)C(F)(F)F                                  | -6.99 | 20.45 | 2.48 | P | OUT |
| QL01596 | Diethyl 2,6-dihydroxy-2,6-bis(nonafluorobutyl)-4-phenyloxane-3,5-dicarboxylate                | 359875-73-3  | CCOC(=O)C1C(C(C(=O)OCC)C(O)(OC1(O)C(F)(F)C(F)(F)C(F)(F)C(F)(F)C(F)(F)C(F)(F)C(F)(F)F)c1cccc1 | -7.39 | 25.71 | 2.52 | P | OUT |
| QL01597 | Ethyl 2-(pentadecafluoroheptyl)imidazo[1,2-a]pyridine-3-carboxylate                           | 135339-05-8  | CCOC(=O)c1c(nc2cccn12)C(F)(F)C(F)(F)C(F)(F)C(F)(F)C(F)(F)C(F)(F)F                            | -8.34 | 33.33 | 2.73 | P | IN  |
| QL01598 | Ethyl 3-methyl-5-(nonafluorobutyl)-1H-pyrazole-4-carboxylate                                  | 119403-58-6  | CCOC(=O)c1c(Nnc1C)C(F)(F)C(F)(F)C(F)(F)C(F)(F)F                                              | -7.29 | 27.27 | 2.43 | P | OUT |
| QL01599 | Ethyl 6-(heptafluoropropyl)pyridine-3-carboxylate                                             | 1574401-92-5 | CCOC(=O)c1ccc(nc1)C(F)(F)C(F)(F)C(F)(F)F                                                     | -7.27 | 24.14 | 2.51 | P | OUT |
| QL01600 | Ethyl 4-[(nonafluorobutyl)sulfonyl]benzoate                                                   | 1262679-06-0 | CCOC(=O)c1ccc(SC(F)(F)C(F)(F)C(F)(F)C(F)(F)F)cc1                                             | -7.98 | 26.47 | 2.76 | P | OUT |
| QL01601 | Ethyl 2-(heptafluoropropyl)benzoate                                                           | 1310492-25-1 | CCOC(=O)c1ccccc1C(F)(F)C(F)(F)C(F)(F)F                                                       | -6.58 | 23.33 | 2.22 | P | OUT |
| QL01602 | Ethyl 5-(2,2,3,3,4,4,4-heptafluorobutanamido)-1-phenyl-1H-pyrazole-4-carboxylate              | 545359-89-5  | CCOC(=O)c1cnn(c1NC(=O)C(F)(F)C(F)(F)C(F)(F)F)-c1ccccc1                                       | -6.77 | 17.07 | 2.48 | P | OUT |
| QL01603 | Ethyl 4,4,5,5,6,6,7,7,7-nonafluoro-3-oxoheptanoate                                            | 82941-37-5   | CCOC(=O)CC(=O)C(F)(F)C(F)(F)C(F)(F)C(F)(F)F                                                  | -7.68 | 32.14 | 2.47 | P | IN  |
| QL01604 | Ethyl heptafluorobutyrylacetate                                                               | 336-62-9     | CCOC(=O)CC(=O)C(F)(F)C(F)(F)C(F)(F)F                                                         | -6.96 | 28.00 | 2.26 | P | OUT |
| QL01605 | Ethyl pentafluoropropionyl acetate                                                            | 663-35-4     | CCOC(=O)CC(=O)C(F)(F)C(F)(F)F                                                                | -6.44 | 22.73 | 2.17 | P | OUT |
| QL01606 | Ethyl 7,7,8,8,9,9,10,10,10-nonafluoro-3-oxodecanoate                                          | 1444474-83-2 | CCOC(=O)CC(=O)CCCC(F)(F)C(F)(F)C(F)(F)C(F)(F)F                                               | -7.79 | 24.32 | 2.74 | P | OUT |
| QL01607 | Ethyl 4,4,5,5,6,6,6-heptafluoro-3-bis(trifluoromethyl)hexanoate                               | 161261-13-8  | CCOC(=O)CC(C(F)(F)F)(C(F)(F)F)C(F)(F)C(F)(F)C(F)(F)F                                         | -7.35 | 40.63 | 2.08 | P | IN  |
| QL01608 | Ethyl 4,4,5,5,6,6,6-heptafluoro-3-(nitromethyl)hexanoate                                      | 376-88-5     | CCOC(=O)CC(C[N+])([O-])=O)C(F)(F)C(F)(F)C(F)(F)F                                             | -6.52 | 22.58 | 2.21 | P | OUT |
| QL01609 | Octanoic acid, 3,3,4,4,5,5,6,6,7,7,8,8,8-tridecafluoro-, ethyl ester                          | 153296-01-6  | CCOC(=O)CC(F)(F)C(F)(F)C(F)(F)C(F)(F)C(F)(F)C(F)(F)F                                         | -8.32 | 40.63 | 2.52 | P | IN  |
| QL01610 | Ethyl 3,3,4,4,5,5,6,6,6-nonafluorohexanoate                                                   | 172287-15-9  | CCOC(=O)CC(F)(F)C(F)(F)C(F)(F)C(F)(F)F                                                       | -7.39 | 34.62 | 2.27 | P | IN  |
| QL01611 | Ethyl 3,3,4,4,5,5,5-heptafluoropentanoate                                                     | 773136-96-2  | CCOC(=O)CC(F)(F)C(F)(F)C(F)(F)F                                                              | -6.87 | 30.43 | 2.15 | P | IN  |
| QL01612 | Ethyl 4,4,5,5,6,6,6-heptafluoro-3-hydroxyhexanoate                                            | 2707-76-8    | CCOC(=O)CC(O)C(F)(F)C(F)(F)C(F)(F)F                                                          | -6.84 | 25.93 | 2.26 | P | OUT |
| QL01613 | Ethyl 4,4,5,5,6,6,6-heptafluoro-3-sulfonylhexanoate                                           | 377-64-0     | CCOC(=O)CC(S)C(F)(F)C(F)(F)C(F)(F)F                                                          | -6.84 | 25.93 | 2.26 | P | OUT |











|         |                                                                                                                       |              |                                                                                   |       |       |      |   |     |
|---------|-----------------------------------------------------------------------------------------------------------------------|--------------|-----------------------------------------------------------------------------------|-------|-------|------|---|-----|
| QL01687 | N,N-dimethyl-2H-perfluoroethanamine                                                                                   | 1550-50-1    | CN(C)C(F)(F)C(F)F                                                                 | -4.85 | 25.00 | 1.39 | P | OUT |
| QL01688 | Benzenamine, 4-(heptadecafluorooctyl)-N,N-dimethyl-N'-[4-(Dimethylamino)phenyl]methylidene                            | 80791-09-9   | CN(C)C1=CC=C(C=C1)C(F)(F)C(F)(F)C(F)(F)C(F)(F)C(F)(F)C(F)(F)C(F)(F)C(F)(F)F       | -9.04 | 38.64 | 2.90 | P | IN  |
| QL01689 | ne)-2,2,3,3,4,4,5,5,6,6,7,7,7-tridecafluoroheptanehydrazide                                                           | 328016-16-6  | CN(C)c1ccc(C=NNC(=O)C(F)(F)C(F)(F)C(F)(F)C(F)(F)C(F)(F)C(F)(F)cc1                 | -8.79 | 28.89 | 3.06 | P | OUT |
| QL01690 | 4-(1,1,1,2,3,3,3-Heptafluoropropan-2-yl)-N,N-dimethylaniline                                                          | 2396-19-2    | CN(C)c1ccc(cc1)C(F)(C(F)(F)F)C(F)(F)F                                             | -6.37 | 24.14 | 2.10 | P | OUT |
| QL01691 | N,N-Dimethyl-4-(tridecafluorohexyl)aniline                                                                            | 141822-33-5  | CN(C)c1ccc(cc1)C(F)(F)C(F)(F)C(F)(F)C(F)(F)C(F)(F)C(F)(F)F                        | -8.34 | 34.21 | 2.71 | P | IN  |
| QL01692 | 4-(Dimethylamino)phenyl nonafluorobutane-1-sulfonate                                                                  | 1463426-91-6 | CN(C)c1ccc(OS(=O)(=O)C(F)(F)C(F)(F)C(F)(F)C(F)(F)cc1                              | -7.68 | 25.00 | 2.67 | P | OUT |
| QL01693 | 1-(Dimethylamino)-4,4,5,5,6,6,7,7,7-nonafluoroheptan-2-ol                                                             | 1023972-12-4 | CN(C)CC(O)CC(F)(F)C(F)(F)C(F)(F)C(F)(F)F                                          | -6.97 | 28.13 | 2.26 | P | OUT |
| QL01694 | 1-Propanaminium, 2-hydroxy-N,N,N-trimethyl-, 3-[(gamma.-.omega.-perfluoro-C6-20-alkyl)thio] derivs., chlorides        | 70983-60-7   | CN(C)CC(O)SC(F)(F)C(F)(F)C(F)(F)C(F)(F)C(F)(F)C(F)(F)F                            | -8.04 | 36.11 | 2.52 | P | IN  |
| QL01695 | N,N-Dimethyl-3-((perfluorohexyl)ethylsulfonyl)aminopropanamine N-oxide                                                | 80475-32-7   | CN(C)CCC[NH+][O-][S](=O)(=O)CCC(F)(F)C(F)(F)C(F)(F)C(F)(F)C(F)(F)F                | -8.32 | 26.53 | 2.91 | P | OUT |
| QL01696 | N-[4-(Dimethylamino)butyl]-2,2,3,3,4,4,5,5,6,6,7,7,8,8,8-pentadecafluorooctanamide                                    | 118454-01-6  | CN(C)CCCCNC(=O)C(F)(F)C(F)(F)C(F)(F)C(F)(F)C(F)(F)C(F)(F)C(F)(F)F                 | -8.76 | 31.91 | 2.96 | P | OUT |
| QL01697 | 1-Propanesulfonic acid, 3-[[3-(dimethylamino)propyl][[(tridecafluorohexyl)sulfonyl]amino]-2-hydroxy-, monosodium salt | 73772-32-4   | CN(C)CCCN(CC(CS(=O)(=O)[O-])O)S(=O)(=O)C(C(C(C(C(F)(F)F)(F)F)(F)F)(F)F)(F)F.[Na+] | -7.93 | 23.21 | 2.83 | P | OUT |
| QL01698 | 1-((3-(Dimethylamino)propyl)amino)-(3-(perfluorooctyl))propan-2-ol                                                    | 94159-81-6   | CN(C)CCCNC(O)CC(F)(F)C(F)(F)C(F)(F)C(F)(F)C(F)(F)C(F)(F)C(F)(F)F                  | -9.09 | 30.91 | 3.14 | P | OUT |
| QL01699 | Perfluorobutane sulfonamide                                                                                           | 68555-77-1   | CN(C)CCCN(S(=O)(=O)C(F)(F)C(F)(F)C(F)(F)F                                         | -7.40 | 25.00 | 2.54 | P | OUT |
| QL01700 | 62 Fluorotelomer sulfonamide                                                                                          | 34455-22-6   | CN(C)CCCN(S(=O)(=O)CCC(F)(F)C(F)(F)C(F)(F)C(F)(F)C(F)(F)F                         | -8.37 | 27.08 | 2.92 | P | OUT |
| QL01701 | 1,1,2,2,3,3,4,4,5,5,6,6,6-Tridecafluoro-N,N-dimethylhexane-1-sulfonamide                                              | 1270179-82-2 | CN(C)S(=O)(=O)C(F)(F)C(F)(F)C(F)(F)C(F)(F)C(F)(F)C(F)(F)F                         | -7.77 | 41.94 | 2.24 | P | IN  |
| QL01702 | N-{3-[(3,3,4,4,5,5,6,6,7,7,8,8,9,9,10,10,10-Heptadecafluorodecyl)sulfonyl]-2-hydroxypropyl}-N-methylglycine           | 93128-66-6   | CN(CC(O)CSCCC(F)(F)C(F)(F)C(F)(F)C(F)(F)C(F)(F)C(F)(F)C(F)(F)CC(O)=O              | -9.32 | 31.48 | 3.23 | P | OUT |
| QL01703 | Isocotanesulfonamide, heptadecafluoro-N-(2-hydroxyethyl)-N-methyl-                                                    | 93894-65-6   | CN(CCO)[S](=O)(=O)C(F)(F)C(F)(F)C(F)(F)C(F)(F)C(F)(F)C(F)(F)C(F)(F)F              | -8.71 | 41.46 | 2.67 | P | IN  |
| QL01704 | N-(2-hydroxyethyl)-N-methylperfluoro-2-methylpropanesulfonamide                                                       | 93762-11-9   | CN(CCO)S(=O)(=O)C(F)(F)C(F)(F)C(F)(F)C(F)(F)F                                     | -6.89 | 31.03 | 2.14 | P | IN  |
| QL01705 | 1-Pentanesulfonamide, 1,1,2,2,3,3,4,4,5,5,5-undecafluoro-N-(2-hydroxyethyl)-N-methyl-                                 | 68555-74-8   | CN(CCO)S(=O)(=O)C(F)(F)C(F)(F)C(F)(F)C(F)(F)C(F)(F)F                              | -7.79 | 34.38 | 2.45 | P | IN  |
| QL01706 | 1-Butanesulfonamide, 1,1,2,2,3,3,4,4,4-nonafluoro-N-(2-hydroxyethyl)-N-methyl-                                        | 34454-97-2   | CN(CCO)S(=O)(=O)C(F)(F)C(F)(F)C(F)(F)C(F)(F)F                                     | -7.11 | 31.03 | 2.24 | P | IN  |

|         |                                                                                         |              |                                                                                                  |
|---------|-----------------------------------------------------------------------------------------|--------------|--------------------------------------------------------------------------------------------------|
| QL01707 | 3,3,4,4,5,5,6,6,7,7,8,8,8-Tridecafluoro-N-(2-hydroxyethyl)-N-methyl-1-octanesulfonamide | 51619-73-9   | CN(CCO)S(=O)(=O)CCC(F)(F)C(F)(F)C(F)(F)C(F)(F)C(F)(F)C(F)(F)F                                    |
| QL01708 | 2-[(Heptadecafluorooctyl)(methyl)amino]ethyl prop-2-enoate                              | 93491-54-4   | CN(CCOC(=O)C=C)C(F)(F)C(F)(F)C(F)(F)C(F)(F)C(F)(F)C(F)(F)C(F)(F)C(F)(F)F                         |
| QL01709 | 2-Propenoic acid, 2-[methyl[(undecafluoropentyl)sulfonyl]amino]ethyl ester              | 67584-56-9   | CN(CCOC(=O)C=C)S(=O)(=O)C(F)(F)C(F)(F)C(F)(F)C(F)(F)C(F)(F)F                                     |
| QL01710 | 2-Propenoic acid, 2-[methyl[(nonafluorobutyl)sulfonyl]amino]ethyl ester                 | 67584-55-8   | CN(CCOC(=O)C=C)S(=O)(=O)C(F)(F)C(F)(F)C(F)(F)C(F)(F)F                                            |
| QL01711 | Bis[N-methyl(perfluorobutyl)sulfonamidoeethyl]phosphoric acid                           | 120945-47-3  | CN(CCOP(O)(=O)OCCN(C)S(=O)(=O)C(F)(F)C(F)(F)C(F)(F)C(F)(F)S(=O)(=O)C(F)(F)C(F)(F)C(F)(F)C(F)(F)F |
| QL01712 | 2-{Methyl[(nonafluorobutyl)sulfonyl]amino}ethyl phosphate                               | 147545-41-3  | CN(CCOP(O)(O)=O)S(=O)(=O)C(F)(F)C(F)(F)C(F)(F)C(F)(F)F                                           |
| QL01713 | 2,2,3,3,4,4,4-Heptafluoro-N-hydroxy-N-methylbutanamide                                  | 193008-44-5  | CN(O)C(=O)C(F)(F)C(F)(F)C(F)(F)F                                                                 |
| QL01714 | N,N-Dimethyl perfluorooctane sulfonamide                                                | 213181-78-3  | CN(S(=O)C(F)(F)C(F)(F)C(F)(F)C(F)(F)C(F)(F)C(F)(F)C(F)(F)F)=O)C                                  |
| QL01715 | 1,1,2,2,3,3,4,4,4-Nonafluoro-N-methyl-N-(trimethylstannyl)butane-1-sulfonamide          | 41006-33-1   | CN(S(=O)C(F)(F)C(F)(F)C(F)(F)C(F)(F)F)[Sn](C)(C)C                                                |
| QL01716 | Heptadecafluoro-N-methylisooctanesulphonamide                                           | 93894-71-4   | CN[S](=O)(=O)C(F)(F)C(F)(F)C(F)(F)C(F)(F)C(F)(F)C(F)(F)C(F)(F)C(F)(F)F                           |
| QL01717 | 1-Heptanesulfonamide, 1,1,2,2,3,3,4,4,5,5,6,6,7,7,7-pentadecafluoro-N-methyl-           | 68259-14-3   | CN[S](=O)(=O)C(F)(F)C(F)(F)C(F)(F)C(F)(F)C(F)(F)C(F)(F)C(F)(F)F                                  |
| QL01718 | 1-Hexanesulfonamide, 1,1,2,2,3,3,4,4,5,5,6,6,6-tridecafluoro-N-methyl-                  | 68259-15-4   | CN[S](=O)(=O)C(F)(F)C(F)(F)C(F)(F)C(F)(F)C(F)(F)C(F)(F)F                                         |
| QL01719 | 1-Pentanesulfonamide, 1,1,2,2,3,3,4,4,5,5,5-undecafluoro-N-methyl-                      | 68298-13-5   | CN[S](=O)(=O)C(F)(F)C(F)(F)C(F)(F)C(F)(F)C(F)(F)F                                                |
| QL01720 | 1-Butanesulfonamide, 1,1,2,2,3,3,4,4,4-nonafluoro-N-methyl-                             | 68298-12-4   | CN[S](=O)(=O)C(F)(F)C(F)(F)C(F)(F)C(F)(F)F                                                       |
| QL01721 | 1-Methyl-2-(nonafluorobutyl)-1H-indole                                                  | 1608112-35-1 | Cn1c(cc2cccc12)C(F)(F)C(F)(F)C(F)(F)C(F)(F)F                                                     |
| QL01722 | 3,3,4,4,5,5,5-Heptafluoro-1-(3-methyl-1,3-benzothiazol-2(3H)-ylidene)pentan-2-one       | 41131-07-1   | CN1C(Sc2cccc12)=CC(=O)C(F)(F)C(F)(F)C(F)(F)F                                                     |
| QL01723 | 1H-Pyrrole, 1-methyl-2-(tridecafluorohexyl)-                                            | 64435-67-2   | CN1C=CC=C1C(F)(F)C(F)(F)C(F)(F)C(F)(F)C(F)(F)C(F)(F)F                                            |
| QL01724 | 1-(1-Methyl-1H-indol-3-yl)thiolan-1-ium nonafluorobutane-1-sulfonate                    | 867373-18-0  | Cn1cc([S+](2CCCC2)c2cccc12.[O-]S(=O)(=O)C(F)(F)C(F)(F)C(F)(F)C(F)(F)F                            |
| QL01725 | 2,2,3,3,4,4,5,5,6,6,7,7,7-Tridecafluoro-1-(4-methylpiperazin-1-yl)heptan-1-one          | 560092-29-7  | CN1CCN(CC1)C(=O)C(F)(F)C(F)(F)C(F)(F)C(F)(F)C(F)(F)C(F)(F)F                                      |
| QL01726 | 2,2,3,3,4,4,4-Heptafluoro-1-(4-methylpiperazin-1-yl)butan-1-one                         | 499975-92-7  | CN1CCN(CC1)C(=O)C(F)(F)C(F)(F)C(F)(F)F                                                           |
| QL01727 | Heptadecafluorononanoic acid--N-methylmethanamine (1/1)                                 | 77032-24-7   | CNC.OC(=O)C(F)(F)C(F)(F)C(F)(F)C(F)(F)C(F)(F)C(F)(F)C(F)(F)C(F)(F)F                              |

|       |       |      |   |     |
|-------|-------|------|---|-----|
| -8.28 | 31.71 | 2.75 | P | OUT |
| -9.15 | 38.64 | 2.95 | P | IN  |
| -8.14 | 28.95 | 2.76 | P | OUT |
| -7.82 | 25.71 | 2.71 | P | OUT |
| -9.35 | 30.00 | 3.28 | P | OUT |
| -7.44 | 26.47 | 2.52 | P | OUT |
| -6.54 | 36.84 | 1.83 | P | IN  |
| -8.63 | 45.95 | 2.51 | P | IN  |
| -6.71 | 27.27 | 2.17 | P | OUT |
| -8.71 | 50.00 | 2.43 | P | IN  |
| -8.62 | 48.39 | 2.44 | P | IN  |
| -8.03 | 46.43 | 2.23 | P | IN  |
| -7.71 | 44.00 | 2.15 | P | IN  |
| -6.94 | 40.91 | 1.89 | P | IN  |
| -7.00 | 29.03 | 2.25 | P | OUT |
| -6.95 | 22.58 | 2.40 | P | OUT |
| -7.77 | 41.94 | 2.24 | P | IN  |
| -5.84 | 18.75 | 2.01 | P | OUT |
| -8.28 | 33.33 | 2.71 | P | IN  |
| -6.69 | 23.33 | 2.27 | P | OUT |
| -9.03 | 43.59 | 2.76 | P | IN  |





|         |                                                                                                                                                   |              |                                                                                                                |        |       |      |   |     |
|---------|---------------------------------------------------------------------------------------------------------------------------------------------------|--------------|----------------------------------------------------------------------------------------------------------------|--------|-------|------|---|-----|
|         | Methyl difluoro{1,1,2,2-tetrafluoro-2-[1,1,2,2-tetrafluoro-2-(trifluoromethoxy)ethoxy]ethoxy} acetate                                             | 169289-58-1  | COC(=O)C(F)(F)OC(F)(F)C(F)(F)OC(F)(F)C(F)(F)OC(F)(F)F                                                          | -8.96  | 44.83 | 2.69 | P | IN  |
| QL01781 | Methyl perfluoro-3,6-dioxahепtanoate                                                                                                              | 39187-41-2   | COC(=O)C(F)(F)OC(F)(F)C(F)(F)OC(F)(F)F                                                                         | -7.70  | 40.91 | 2.23 | P | IN  |
| QL01782 | Methyl 2,3,3,3-tetrafluoro-2-[(undecafluoropentyl)oxy]propanoate                                                                                  | 220369-95-9  | COC(=O)C(F)(OC(F)(F)C(F)(F)C(F)(F)C(F)(F)C(F)(F)C(F)(F)F                                                       | -8.64  | 50.00 | 2.40 | P | IN  |
| QL01783 | Methyl perfluoro(2-propoxypropanoate)                                                                                                             | 13140-34-6   | COC(=O)C(F)(OC(F)(F)C(F)(F)C(F)(F)C(F)(F)F                                                                     | -7.56  | 45.83 | 2.03 | P | IN  |
| QL01784 | Methyl 2,3,3,3-tetrafluoro-2-(pentafluoroethoxy)propanoate                                                                                        | 117516-09-3  | COC(=O)C(F)(OC(F)(F)C(F)(F)C(F)(F)F                                                                            | -6.94  | 42.86 | 1.84 | P | IN  |
| QL01785 | Methyl 2,3,3,3-tetrafluoro-2-[1,1,2,3,3,3-hexafluoro-2-(heptafluoropropoxy)propoxy]propanoate                                                     | 26131-32-8   | COC(=O)C(F)(OC(F)(F)C(F)(OC(F)(F)C(F)(F)C(F)(F)C(F)(F)C(F)(F)F                                                 | -8.81  | 50.00 | 2.48 | P | IN  |
| QL01786 | Methylperfluoro-2,5,8-trimethyl-3,6,9-trioxadodecanoic acid                                                                                       | 39187-47-8   | COC(=O)C(F)(OC(F)(F)C(F)(OC(F)(F)C(F)(F)C(F)(F)C(F)(F)C(F)(F)C(F)(F)F                                          | -9.64  | 52.27 | 2.79 | P | IN  |
| QL01787 | Perfluorotetramethyltetraoxapentadecanoic acid                                                                                                    | 133609-46-8  | COC(=O)C(F)(OC(F)(F)C(F)(OC(F)(F)C(F)(F)C(F)(F)C(F)(F)C(F)(F)C(F)(F)C(F)(F)F                                   | -10.37 | 53.70 | 3.08 | P | OUT |
| QL01788 | Methyl 2,4,4,5,7,7,8,10,10,11,13,13,14,16,16,17,17,18,18,18-icosafuoro-2,5,8,11,14-pentakis(trifluoromethyl)-3,6,9,12,15-pentaoxaoctadecan-1-oate | 1005033-64-6 | COC(=O)C(F)(OC(F)(F)C(F)(OC(F)(F)C(F)(F)C(F)(F)C(F)(F)C(F)(F)C(F)(F)C(F)(F)C(F)(F)C(F)(F)F                     | -10.91 | 54.69 | 3.29 | P | OUT |
| QL01789 | Methyl 2,3,4,4,5,5,6,6,6-nonafluorohex-2-enoate                                                                                                   | 88022-46-2   | COC(=O)C(F)=C(F)C(F)(F)C(F)(F)C(F)(F)F                                                                         | -7.68  | 42.86 | 2.17 | P | IN  |
| QL01790 | Methyl 3-amino-4,4,5,5,6,6,6-heptafluorohex-2-enoate                                                                                              | 106203-17-2  | COC(=O)C=C(N)C(F)(F)C(F)(F)C(F)(F)F                                                                            | -6.94  | 30.43 | 2.18 | P | IN  |
| QL01791 | Methyl 4,4,5,5,6,6,6-heptafluorohex-2-enoate                                                                                                      | 813-06-9     | COC(=O)C=CC(F)(F)C(F)(F)C(F)(F)F                                                                               | -7.05  | 33.33 | 2.15 | P | IN  |
| QL01792 | Methyl 3-(heptadecafluorooctyl)benzoate                                                                                                           | 80791-11-3   | COC(=O)C1=CC(=CC=C1)C(F)(F)C(F)(F)C(F)(F)C(F)(F)C(F)(F)C(F)(F)C(F)(F)F                                         | -9.16  | 40.48 | 2.90 | P | IN  |
| QL01793 | Methyl 4-(heptadecafluorooctyl)benzoate                                                                                                           | 80791-12-4   | COC(=O)C1=CC(=C(C=C1)C(F)(F)C(F)(F)C(F)(F)C(F)(F)C(F)(F)C(F)(F)C(F)(F)F                                        | -9.26  | 40.48 | 2.95 | P | IN  |
| QL01794 | Methyl 4-(nonafluorobutyl)benzoate                                                                                                                | 88951-00-2   | COC(=O)C1=CC(=C(C=C1)C(F)(F)C(F)(F)C(F)(F)F                                                                    | -7.76  | 30.00 | 2.56 | P | OUT |
| QL01795 | Methyl 4-(heptafluoropropyl)benzoate                                                                                                              | 64299-47-4   | COC(=O)C1=CC(=C(C=C1)C(F)(F)C(F)(F)C(F)(F)F                                                                    | -7.37  | 25.93 | 2.50 | P | OUT |
| QL01796 | Methyl 5-(heptafluoropropyl)furan-2-carboxylate                                                                                                   | 104939-25-5  | COC(=O)C1=CC(=C(O1)C(F)(F)C(F)(F)C(F)(F)F                                                                      | -7.11  | 29.17 | 2.29 | P | OUT |
| QL01797 | Methyl 2-(heptafluoropropyl)-6-methoxybenzoate                                                                                                    | 109296-89-1  | COC(=O)c1c(OC)cccc1C(F)(F)C(F)(F)C(F)(F)F                                                                      | -6.31  | 22.58 | 2.12 | P | OUT |
| QL01798 | Methyl 2-methoxy-6-[(1,1,2,2,3,3,4,4,4-nonafluorobutane-1-sulfonyl)oxy]benzoate                                                                   | 475630-76-3  | COC(=O)c1c(OC)cccc1OS(=O)(=O)C(F)(F)C(F)(F)C(F)(F)C(F)(F)F                                                     | -7.23  | 23.68 | 2.50 | P | OUT |
| QL01799 | Methyl 3,4,5-tris[1,1,2-trifluoro-2-(heptafluoropropoxy)ethoxy]benzoate                                                                           | 1233312-86-1 | COC(=O)c1cc(OC(F)(F)C(F)(OC(F)(F)C(F)(F)C(F)(F)F)c(OC(F)(F)C(F)(F)C(F)(F)C(F)(F)F)c(OC(F)(F)C(F)(F)C(F)(F)F)c1 | -9.93  | 43.48 | 3.17 | P | OUT |
| QL01800 | Methyl 4-{1,1,1,2,3,3,3-heptafluoropropan-2-yl)benzoate                                                                                           | 51114-06-8   | COC(=O)c1ccc(cc1)C(F)(F)C(F)(F)C(F)(F)F                                                                        | -6.61  | 25.93 | 2.16 | P | OUT |
| QL01801 | Methyl 4-(pentadecafluoroheptyl)cyclohexane-1-carboxylate                                                                                         | 88951-17-1   | COC(=O)C1CCC(CC1)C(F)(F)C(F)(F)C(F)(F)C(F)(F)C(F)(F)C(F)(F)F                                                   | -8.74  | 33.33 | 2.91 | P | OUT |
| QL01802 |                                                                                                                                                   |              |                                                                                                                |        |       |      |   |     |















|         |                                                                                                         |                                                                           |       |       |      |   |     |
|---------|---------------------------------------------------------------------------------------------------------|---------------------------------------------------------------------------|-------|-------|------|---|-----|
| QL01928 | double bond perfluoroalkyl<br>(linear) sulfonic acids, n=5                                              | F/C(C(F)(F)C(F)(F)C(F)(F)C(F)(F)S(=O)(O)=C(F)C(F)(F)F                     | -8.96 | 53.57 | 2.45 | P | IN  |
| QL01929 | double bond-, H-, ether-<br>substituted perfluoroalkyl (linear)<br>carboxylic acids, n=4                | F/C(C(F)(F)C(F)(F)C(F)(F)C(F)(F)OCC(O)=O)=CC(F)(F)F                       | -8.29 | 42.86 | 2.44 | P | IN  |
| QL01930 | double bond perfluoroalkyl<br>(linear) sulfonic acids, n=4                                              | F/C(C(F)(F)C(F)(F)C(F)(F)C(F)(F)S(=O)(O)=C(F)C(F)(F)F                     | -8.40 | 52.00 | 2.24 | P | IN  |
| QL01931 | multiple double bond-<br>perfluoroalkyl (linear) carboxylic<br>acids, n=3                               | F/C(C(F)(F)C(F)(F)C(F)(F)C(O)=O)=C(F)C(F)=C(F)F                           | -8.32 | 50.00 | 2.26 | P | IN  |
| QL01932 | double bond-, H-, ether-<br>substituted perfluoroalkyl (linear)<br>carboxylic acids, n=3                | F/C(C(F)(F)C(F)(F)C(F)(F)OCC(O)=O)=CC(F)(F)F                              | -8.01 | 40.00 | 2.40 | P | IN  |
| QL01933 | double bond perfluoroalkyl<br>(linear) sulfonic acids, n=3                                              | F/C(C(F)(F)C(F)(F)C(F)(F)S(=O)(O)=C(F)C(F)(F)F                            | -8.11 | 50.00 | 2.17 | P | IN  |
| QL01934 | multiple double bond-<br>perfluoroalkyl (linear) carboxylic<br>acids, n=2                               | F/C(C(F)(F)C(F)(F)C(O)=O)=C(F)C(F)=C(F)F                                  | -7.96 | 47.37 | 2.17 | P | IN  |
| QL01935 | double bond-, H-, ether-<br>substituted perfluoroalkyl (linear)<br>carboxylic acids, n=2                | F/C(C(F)(F)C(F)(F)OCC(O)=O)=CC(F)(F)F                                     | -7.29 | 36.36 | 2.18 | P | IN  |
| QL01936 | double bond perfluoroalkyl<br>(linear) sulfonic acids, n=2                                              | F/C(C(F)(F)C(F)(F)S(=O)(O)=C(F)C(F)(F)F                                   | -7.37 | 47.37 | 1.91 | P | IN  |
| QL01937 | multiple double bond-<br>perfluoroalkyl (linear) carboxylic<br>acids, n=1                               | F/C(C(F)(F)C(O)=O)=C(F)C(F)=C(F)F                                         | -7.21 | 43.75 | 1.93 | P | IN  |
| QL01938 | double bond-, H-, ether-<br>substituted perfluoroalkyl (linear)<br>carboxylic acids, n=1                | F/C(C(F)(F)OCC(O)=O)=CC(F)(F)F                                            | -6.94 | 31.58 | 2.15 | P | IN  |
| QL01939 | double bond perfluoroalkyl<br>(linear) sulfonic acids, n=1                                              | F/C(C(F)(F)S(=O)(O)=O)=C(F)C(F)(F)F                                       | -6.87 | 43.75 | 1.78 | P | IN  |
| QL01940 | Pentafluorosulfide Perfluoroalkyl<br>(linear) carboxylic acids, n=8                                     | FC([S](F)(F)(F)F)(C(F)(F)C(F)(F)C(F)(F)C(F)(F)C(F)(F)C(F)(F)C(O)=O)F      | -9.60 | 61.76 | 2.51 | P | IN  |
| QL01941 | Pentafluorosulfide Perfluoroalkyl<br>(linear) carboxylic acids, n=7                                     | FC([S](F)(F)(F)F)(C(F)(F)C(F)(F)C(F)(F)C(F)(F)C(F)(F)C(F)(F)C(O)=O)F      | -9.40 | 61.29 | 2.43 | P | IN  |
| QL01942 | Pentafluorosulfide Perfluoroalkyl<br>(linear) carboxylic acids, n=6                                     | FC([S](F)(F)(F)F)(C(F)(F)C(F)(F)C(F)(F)C(F)(F)C(F)(F)C(O)=O)F             | -8.91 | 60.71 | 2.23 | P | IN  |
| QL01943 | double bond-, H-substituted<br>perfluoroalkyl sulfonic acids, n=6                                       | FC(/C(F)=C(F)/C(F)(F)F)([H])C(F)(F)C(F)(F)C(F)(F)C(F)(F)C(F)(F)S(=O)(O)=O | -9.46 | 52.94 | 2.69 | P | IN  |
| QL01944 | double bond-, H-substituted<br>perfluoroalkyl sulfonic acids, n=5                                       | FC(/C(F)=C(F)/C(F)(F)F)([H])C(F)(F)C(F)(F)C(F)(F)C(F)(F)S(=O)(O)=O        | -8.99 | 51.61 | 2.52 | P | IN  |
| QL01945 | double bond-, H-substituted<br>perfluoroalkyl sulfonic acids, n=4                                       | FC(/C(F)=C(F)/C(F)(F)F)([H])C(F)(F)C(F)(F)C(F)(F)S(=O)(O)=O               | -8.76 | 50.00 | 2.46 | P | IN  |
| QL01946 | double bond-, H-substituted<br>perfluoroalkyl sulfonic acids, n=3                                       | FC(/C(F)=C(F)/C(F)(F)F)([H])C(F)(F)C(F)(F)S(=O)(O)=O                      | -8.17 | 48.00 | 2.25 | P | IN  |
| QL01947 | double bond-, H-substituted<br>perfluoroalkyl sulfonic acids, n=2                                       | FC(/C(F)=C(F)/C(F)(F)F)([H])C(F)(F)C(F)(F)S(=O)(O)=O                      | -7.79 | 45.45 | 2.15 | P | IN  |
| QL01948 | double bond-, H-substituted<br>perfluoroalkyl sulfonic acids, n=1                                       | FC(/C(F)=C(F)/C(F)(F)F)([H])C(F)(F)S(=O)(O)=O                             | -7.04 | 42.11 | 1.90 | P | IN  |
| QL01949 | (2Z)-1,1,1,2,4,4,5,5,5-Nonafluoro-3-<br>(1,1,1,2,3,3,3-heptafluoropropan-<br>2-yl)pent-2-ene 58621-71-9 | FC(=C(/C(F)(F)C(F)(F)C(F)(F)C(F)(F)C(F)(F)C(F)(F)F                        | -7.87 | 66.67 | 1.59 | P | OUT |





[illegible]





[illegible]





|         |                                                                                                      |             |                                                                       |       |       |      |   |     |
|---------|------------------------------------------------------------------------------------------------------|-------------|-----------------------------------------------------------------------|-------|-------|------|---|-----|
| QL02151 | double bond-, ether-substituted perfluoroalkyl (linear) carboxylic acids, n=2                        |             | FC(F)(F)/C(F)=C(F)/C(F)(F)C(F)(F)OC(F)(F)C(O)=O                       | -8.25 | 50.00 | 2.23 | P | IN  |
| QL02152 | double bond-, ether-substituted perfluoroalkyl (linear) carboxylic acids, n=1                        |             | FC(F)(F)/C(F)=C(F)/C(F)(F)OC(F)(F)C(O)=O                              | -7.96 | 47.37 | 2.17 | P | IN  |
| QL02153 | double bond-, ether-substituted perfluoroalkyl (linear) carboxylic acids, n=0                        |             | FC(F)(F)/C(F)=C(OC(F)(F)C(O)=O)F                                      | -7.15 | 43.75 | 1.91 | P | IN  |
| QL02154 | H-substituted perfluoroalkyl (linear) sulfonic acids_ii, n=8                                         |             | FC(F)(F)C([H])(F)C(F)(F)C(F)(F)C(F)(F)C(F)(F)C(F)(F)C(F)(F)S(=O)(O)=O | -9.61 | 55.56 | 2.69 | P | IN  |
| QL02155 | H-substituted perfluoroalkyl (linear) sulfonic acids_ii, n=7                                         |             | FC(F)(F)C([H])(F)C(F)(F)C(F)(F)C(F)(F)C(F)(F)C(F)(F)C(F)(F)S(=O)(O)=O | -9.17 | 54.55 | 2.51 | P | IN  |
| QL02156 | H-substituted perfluoroalkyl (linear) sulfonic acids_ii, n=6                                         |             | FC(F)(F)C([H])(F)C(F)(F)C(F)(F)C(F)(F)C(F)(F)C(F)(F)S(=O)(O)=O        | -8.94 | 53.33 | 2.45 | P | IN  |
| QL02157 | H-substituted perfluoroalkyl (linear) sulfonic acids_ii, n=5                                         |             | FC(F)(F)C([H])(F)C(F)(F)C(F)(F)C(F)(F)C(F)(F)S(=O)(O)=O               | -8.39 | 51.85 | 2.24 | P | IN  |
| QL02158 | H-substituted perfluoroalkyl (linear) sulfonic acids_ii, n=4                                         |             | FC(F)(F)C([H])(F)C(F)(F)C(F)(F)C(F)(F)S(=O)(O)=O                      | -8.09 | 50.00 | 2.16 | P | IN  |
| QL02159 | H-substituted perfluoroalkyl (linear) sulfonic acids_ii, n=3                                         |             | FC(F)(F)C([H])(F)C(F)(F)C(F)(F)S(=O)(O)=O                             | -7.37 | 47.62 | 1.90 | P | IN  |
| QL02160 | H-substituted perfluoroalkyl (linear) sulfonic acids_ii, n=2                                         |             | FC(F)(F)C([H])(F)C(F)(F)S(=O)(O)=O                                    | -6.97 | 44.44 | 1.81 | P | IN  |
| QL02161 | H-substituted perfluoroalkyl (linear) sulfonic acids_ii, n=1                                         |             | FC(F)(F)C([H])(F)C(F)(F)S(=O)(O)=O                                    | -5.93 | 40.00 | 1.46 | P | IN  |
| QL02162 | Perfluoro-3-ethyl-2,4-dimethyl-2-pentene                                                             | 30320-26-4  | FC(F)(F)C=C(C(F)(F)C(F)(F)C(F)(F)C(F)(F)C(F)(F)F                      | -7.71 | 66.67 | 1.52 | P | OUT |
| QL02163 | 1,1-Bis(trifluoromethyl)ethene                                                                       | 382-10-5    | FC(F)(F)C=C(C(F)(F)F                                                  | -6.18 | 50.00 | 1.30 | P | IN  |
|         | 5-Fluoro-5,7,7-tris(trifluoromethyl)-6-(2,2,2-trifluoro-1-(trifluoromethyl)ethylidene)-1,4-dioxepane |             |                                                                       | -6.47 | 48.48 | 1.47 | P | IN  |
| QL02164 | 3-Trifluoromethylperfluoro-2-pentanone                                                               | 94333-56-9  | FC(F)(F)C=C1C(F)(OCCOC1(C(F)(F)F)C(F)(F)C(F)(F)C(F)(F)F               | -8.00 | 63.16 | 1.75 | P | IN  |
| QL02165 | 1,1,1,3,4,4,4-Heptafluoro-3-(trifluoromethyl)butan-2-one                                             | 93830-92-3  | FC(F)(F)C(=O)C(F)(C(F)(F)C(F)(F)C(F)(F)F                              | -7.11 | 62.50 | 1.37 | P | OUT |
| QL02166 | 1,1,1,3,3,4,5,5,5-Nonafluoro-4-(trifluoromethyl)pentan-2-one                                         | 756-12-7    | FC(F)(F)C(=O)C(F)(C(F)(F)C(F)(F)F                                     | -7.92 | 63.16 | 1.71 | P | IN  |
| QL02167 | ketone perfluoroalkyl (linear) carboxylic acids, n=8                                                 | 73041-05-1  | FC(F)(F)C(=O)C(F)(F)C(F)(C(F)(F)C(F)(F)F                              | -9.53 | 54.29 | 2.69 | P | IN  |
| QL02168 | ketone perfluoroalkyl (linear) carboxylic acids, n=7                                                 |             | FC(F)(F)C(=O)C(F)(F)C(F)(F)C(F)(F)C(F)(F)C(F)(F)S(=O)(O)=O            | -9.08 | 53.13 | 2.51 | P | IN  |
| QL02169 | ketone perfluoroalkyl (linear) carboxylic acids, n=5                                                 |             | FC(F)(F)C(=O)C(F)(F)C(F)(F)C(F)(F)C(F)(F)S(=O)(O)=O                   | -8.27 | 50.00 | 2.24 | P | IN  |
| QL02170 | ketone perfluoroalkyl (linear) carboxylic acids, n=4                                                 |             | FC(F)(F)C(=O)C(F)(F)C(F)(F)C(F)(F)S(=O)(O)=O                          | -7.96 | 47.83 | 2.16 | P | IN  |
| QL02171 | ketone perfluoroalkyl (linear) carboxylic acids, n=3                                                 |             | FC(F)(F)C(=O)C(F)(F)C(F)(F)S(=O)(O)=O                                 | -7.21 | 45.00 | 1.90 | P | IN  |
| QL02172 | 2,2,2-Trifluoro-1-[4-(tridecafluorohexyl)phenyl]ethan-1-one                                          | 171183-94-1 | FC(F)(F)C(=O)C1ccc(cc1)C(F)(F)C(F)(F)C(F)(F)C(F)(F)C(F)(F)C(F)(F)F    | -9.14 | 45.71 | 2.75 | P | IN  |
|         |                                                                                                      |             |                                                                       | -9.09 | 53.33 | 2.51 | P | IN  |
| QL02174 | 1,1,1,5,5,6,6,7,7,8,8,9,10,10,10-hexadecafluorodecane-2,4-dione                                      | 147874-76-8 | FC(F)(F)C(=O)CC(=O)C(F)(F)C(F)(F)C(F)(F)C(F)(F)C(F)(F)C(F)(F)F        | -8.29 | 50.00 | 2.24 | P | IN  |
| QL02175 | 1,1,1,5,5,6,6,7,7,8,8,8-dodecafluorooctane-2,4-dione                                                 | 261503-40-6 | FC(F)(F)C(=O)CC(=O)C(F)(F)C(F)(F)C(F)(F)C(F)(F)F                      | -7.93 | 47.62 | 2.15 | P | IN  |
| QL02176 | 3H,3H-Perfluoroheptane-2,4-dione                                                                     | 20583-66-8  | FC(F)(F)C(=O)CC(=O)C(F)(F)C(F)(F)C(F)(F)F                             | -7.14 | 44.44 | 1.88 | P | IN  |
| QL02177 | 3H,3H-Perfluoro-2,4-hexanedione                                                                      | 20825-07-4  | FC(F)(F)C(=O)CC(=O)C(F)(F)C(F)(F)F                                    |       |       |      |   |     |

|         |                                                                                                         |              |                                                                                             |        |       |      |   |     |
|---------|---------------------------------------------------------------------------------------------------------|--------------|---------------------------------------------------------------------------------------------|--------|-------|------|---|-----|
| QL02178 | 3-(Perfluorohexyl)-1-(trifluoroacetyl)-5-(trifluoromethyl)-1H-pyrazole                                  | 261778-38-5  | FC(F)(F)C(=O)N1N=C(C=C1C(F)(F)F)C(F)(F)C(F)(F)C(F)(F)C(F)(F)C(F)(F)F                        | -9.49  | 54.29 | 2.67 | P | IN  |
| QL02179 | 2,2,3,3,4,4,4-Heptafluorobutyl trifluoroacetate                                                         | 1365808-09-8 | FC(F)(F)C(=O)OCC(F)(F)C(F)(F)C(F)F                                                          | -7.98  | 50.00 | 2.11 | P | IN  |
| QL02180 | 2,2,3,3,4,4,4-Heptafluoro-N-[(trifluoroacetyl)oxy]butanamide                                            | 88326-80-1   | FC(F)(F)C(=O)ONC(=O)C(F)(F)C(F)(F)C(F)(F)F                                                  | -8.10  | 47.62 | 2.23 | P | IN  |
| QL02181 | 1,1,1,3,3,5,5,5-Octafluoro-2,2,4,4-tetrakis(trifluoromethyl)pentane                                     | 62375-54-6   | FC(F)(F)C(C(F)(F)F)C(F)(F)C(F)(F)C(C(F)(F)F)C(F)(F)C(F)(F)F                                 | -7.71  | 68.97 | 1.46 | P | OUT |
| QL02182 | Perfluoro-2,2,5,5-tetramethylhexane                                                                     | 71076-47-6   | FC(F)(F)C(C(F)(F)F)C(F)(F)C(F)(F)C(F)(F)C(C(F)(F)F)C(F)(F)C(F)(F)F                          | -8.06  | 68.75 | 1.62 | P | OUT |
| QL02183 | 2,2-bis(Trifluoromethyl)perfluoropropane                                                                | 374-51-6     | FC(F)(F)C(C(F)(F)F)C(F)(F)C(F)(F)C(F)(F)F                                                   | -6.99  | 70.59 | 1.09 | P | OUT |
| QL02184 | Perfluoro tert-butylcyclohexane                                                                         | 84808-64-0   | FC(F)(F)C(C(F)(F)F)C(F)(F)C(F)(F)C1(F)C(F)(F)C(F)(F)C(F)(F)C1(F)F                           | -8.51  | 66.67 | 1.88 | P | OUT |
| QL02185 | Perfluorodecahydro-1-tert-butyl naphthalene                                                             | 118914-94-6  | FC(F)(F)C(C(F)(F)F)C(F)(F)C1(F)C(F)(F)C(F)(F)C(C(F)(F)C2(F)C(F)(F)C(F)(F)C(F)(F)C(F)(F)C12F | -8.69  | 65.00 | 2.01 | P | IN  |
| QL02186 | Perfluorodecahydro-2-tert-butyl naphthalene                                                             | 119107-97-0  | FC(F)(F)C(C(F)(F)F)C(F)(F)C1(F)C(F)(F)C(F)(F)C2(F)C(F)(F)C(F)(F)C(F)(F)C(F)(F)C2(F)C1(F)F   | -9.17  | 65.00 | 2.23 | P | IN  |
| QL02187 | 2H-Perfluoro(2-methylpentane)                                                                           | 30320-28-6   | FC(F)(F)C(C(F)(F)F)C(F)(F)C(F)(F)C(F)(F)F                                                   | -8.04  | 65.00 | 1.71 | P | OUT |
| QL02188 | (1,1,1,5,5,6,6,7,7,7-Decafluorohept-3-yn-2-ylidene)cyclopentane                                         | 139226-05-4  | FC(F)(F)C(C#CC(F)(F)C(F)(F)C(F)(F)F)=C1CCCC1                                                | -7.01  | 33.33 | 2.13 | P | IN  |
| QL02189 | Hexafluoro-2,2,3,3-tetrachlorobutane                                                                    | 375-34-8     | FC(F)(F)C(Cl)(Cl)C(Cl)(Cl)C(F)(F)F                                                          | -7.84  | 71.43 | 1.45 | P | OUT |
| QL02190 | 1,2-Dibromohexafluoropropane                                                                            | 661-95-0     | FC(F)(F)C(F)(Br)C(F)(F)Br                                                                   | -7.64  | 72.73 | 1.32 | P | OUT |
| QL02191 | Bis(perfluoroisopropyl)ketone                                                                           | 813-44-5     | FC(F)(F)C(F)(C(=O)C(F)(C(F)(F)F)C(F)(F)F)C(F)(F)F                                           | -7.66  | 63.64 | 1.58 | P | OUT |
| QL02192 | 1,1,1,2,4,4,5,5-Octafluoro-5-iodo-2-(trifluoromethyl)pentan-3-one                                       | 93822-96-9   | FC(F)(F)C(F)(C(=O)C(F)(F)C(F)(F)F)C(F)(F)F                                                  | -7.84  | 63.16 | 1.68 | P | IN  |
| QL02193 | 1-Propanone, 2,3,3,3-tetrafluoro-1-phenyl-2-(trifluoromethyl)-1-(4-Chlorophenyl)-2,3,3,3-tetrafluoro-2- | 56112-35-7   | FC(F)(F)C(F)(C(=O)C1=CC=CC=C1)C(F)(F)F                                                      | -6.26  | 30.43 | 1.88 | P | IN  |
| QL02194 | (trifluoromethyl)propan-1-one                                                                           | 56041-73-7   | FC(F)(F)C(F)(C(=O)c1ccc(Cl)cc1)C(F)(F)F                                                     | -7.07  | 34.78 | 2.12 | P | IN  |
| QL02195 | Benzyl 2,3,3,3-tetrafluoro-2-(trifluoromethyl)propanoate                                                | 38392-11-9   | FC(F)(F)C(F)(C(=O)OCC1CCCC1)C(F)(F)F                                                        | -6.61  | 25.93 | 2.16 | P | OUT |
| QL02196 | Bis[2,3,3,3-tetrafluoro-1-oxo-2-(trifluoromethyl)propyl] peroxide                                       | 111632-55-4  | FC(F)(F)C(F)(C(=O)OOC(=O)C(F)(F)C(F)(F)C(F)(F)C(F)(F)F                                      | -7.95  | 53.85 | 1.99 | P | IN  |
| QL02197 | 2-bromo-3,4,4,4-tetrafluoro-3-(trifluoromethyl)but-1-ene                                                | 234443-24-4  | FC(F)(F)C(F)(C(Br)=C)C(F)(F)F                                                               | -6.26  | 53.33 | 1.24 | P | IN  |
| QL02198 | Perfluoro-2,3-dimethylbutane                                                                            | 354-96-1     | FC(F)(F)C(F)(C(F)(F)F)C(F)(F)C(F)(F)C(F)(F)F                                                | -7.41  | 70.00 | 1.30 | P | OUT |
| QL02199 | Heptane, 1,1,1,2,3,3,4,5,5,6,7,7,7-tridecafluoro-2,4,6-                                                 | 84808-63-9   | FC(F)(F)C(F)(C(F)(F)F)C(F)(F)C(F)(F)C(F)(F)C(F)(F)C(F)(F)C(F)(F)F                           | -8.97  | 68.75 | 2.03 | P | OUT |
| QL02200 | Perfluoro-2,7-dimethyloctane                                                                            | 3021-63-4    | FC(F)(F)C(F)(C(F)(F)F)C(F)(F)C(F)(F)C(F)(F)C(F)(F)C(F)(F)C(F)(F)F                           | -9.21  | 68.75 | 2.14 | P | OUT |
| QL02201 | Perfluoro-2,9-dimethyldecane                                                                            | 103188-55-2  | FC(F)(F)C(F)(C(F)(F)F)C(F)(F)C(F)(F)C(F)(F)C(F)(F)C(F)(F)C(F)(F)C(F)(F)F                    | -9.84  | 68.42 | 2.43 | P | OUT |
| QL02202 | 1,1,1,2,3,3,4,4,5,5,6,6,7,7,8,8,9,9,10,10,11,12,12-tetracosafuoro-2,11-bis(trifluoromethyl)dodecane     | 118694-32-9  | FC(F)(F)C(F)(C(F)(F)F)C(F)(F)C(F)(F)C(F)(F)C(F)(F)C(F)(F)C(F)(F)C(F)(F)C(F)(F)C(F)(F)F      | -10.36 | 68.18 | 2.67 | P | OUT |
| QL02203 | 1,1,1,2,3,3,4,4,5,5,6,6,7,7,8,8,9,9,10,10-icosafuoro-12-iodo-2-(trifluoromethyl)dodecane                | 242142-80-9  | FC(F)(F)C(F)(C(F)(F)F)C(F)(F)C(F)(F)C(F)(F)C(F)(F)C(F)(F)C(F)(F)C(F)(F)CCI                  | -9.89  | 58.54 | 2.73 | P | OUT |
| QL02204 | 2-(Perfluoro-7-methyloctyl)ethyl iodide                                                                 | 40678-31-7   | FC(F)(F)C(F)(C(F)(F)F)C(F)(F)C(F)(F)C(F)(F)C(F)(F)C(F)(F)CCI                                | -9.29  | 57.14 | 2.50 | P | IN  |



|         |                                                                                                                                   |              |                                                                                       |       |       |      |   |     |
|---------|-----------------------------------------------------------------------------------------------------------------------------------|--------------|---------------------------------------------------------------------------------------|-------|-------|------|---|-----|
| QL02205 | 2-[2,2,3,3,4,4,5,5,6,7,7,7-dodecafluoro-6-(trifluoromethyl)heptyl]oxirane                                                         | 24564-77-0   | FC(F)(F)C(F)(C(F)(F)C(F)(F)C(F)(F)C(F)(F)C(F)(F)CC1CO1                                | -8.09 | 48.39 | 2.20 | P | IN  |
| QL02206 | 1,1,1,2,3,3,4,4,5,5,6,6-dodecafluoro-8-iodo-2-(trifluoromethyl)octane                                                             | 18017-20-4   | FC(F)(F)C(F)(C(F)(F)C(F)(F)C(F)(F)C(F)(F)C(F)(F)CCI                                   | -8.54 | 55.17 | 2.22 | P | IN  |
| QL02207 | 3,3,4,4,5,5,6,6,7,8,8,8-Dodecafluoro-7-(trifluoromethyl)octyl prop-2-enoate                                                       | 50836-65-2   | FC(F)(F)C(F)(C(F)(F)C(F)(F)C(F)(F)C(F)(F)C(F)(F)CCOC(=O)C=C                           | -8.73 | 41.67 | 2.68 | P | IN  |
| QL02208 | Perfluorooisooheptyl iodide                                                                                                       | 3486-08-6    | FC(F)(F)C(F)(C(F)(F)C(F)(F)C(F)(F)C(F)(F)C(F)(F)I                                     | -8.61 | 69.57 | 1.85 | P | OUT |
| QL02209 | 3,3,4,4,5,5,6,6-Octafluoro-5-(trifluoromethyl)hex-1-ene                                                                           | 139060-76-7  | FC(F)(F)C(F)(C(F)(F)C(F)(F)C(F)(F)C(F)(F)C=C                                          | -7.38 | 52.38 | 1.77 | P | IN  |
| QL02210 | 3-(Perfluoro-3-methylbutyl)-1,2-propenoxide                                                                                       | 54009-81-3   | FC(F)(F)C(F)(C(F)(F)F)C(F)(F)C(F)(F)C(F)(F)CC1CO1                                     | -7.03 | 44.00 | 1.85 | P | IN  |
| QL02211 | [3,3,4,4,5,5,6,6,6-octafluoro-5-(trifluoromethyl)hexyl] Prop-2-enoate                                                             | 86217-01-8   | FC(F)(F)C(F)(C(F)(F)F)C(F)(F)C(F)(F)CCOC(=O)C=C                                       | -7.77 | 36.67 | 2.38 | P | IN  |
| QL02212 | Perfluoro-3-methylbutyl iodide                                                                                                    | 1514-90-5    | FC(F)(F)C(F)(C(F)(F)F)C(F)(F)C(F)(F)I                                                 | -7.64 | 70.59 | 1.38 | P | OUT |
| QL02213 | Perfluorodecahydro-1-isobutylinaphthalene                                                                                         | 118945-65-6  | FC(F)(F)C(F)(C(F)(F)F)C(F)(F)C1(F)C(F)(F)C(F)(F)C2(F)C(F)(F)C(F)(F)C(F)(F)C(F)(F)C12F | -9.00 | 65.00 | 2.15 | P | IN  |
| QL02214 | Perfluorodecahydro-2-isobutylinaphthalene                                                                                         | 119141-87-6  | FC(F)(F)C(F)(C(F)(F)F)C(F)(F)C1(F)C(F)(F)C(F)(F)C2(F)C(F)(F)C(F)(F)C(F)(F)C2(F)C1(F)F | -9.60 | 65.00 | 2.42 | P | IN  |
| QL02215 | Perflisobutane                                                                                                                    | 354-92-7     | FC(F)(F)C(F)(C(F)(F)F)C(F)(F)F                                                        | -7.29 | 71.43 | 1.20 | P | OUT |
| QL02216 | Propane, 2-(difluoroiodomethyl)-1,1,1,2,3,3,3-heptafluoro-1,1,2,3,3,3-Hexafluoro-2-(trifluoromethyl)propane-1-sulphonic anhydride | 1542-18-3    | FC(F)(F)C(F)(C(F)(F)F)C(F)(F)I                                                        | -7.29 | 71.43 | 1.20 | P | OUT |
| QL02217 | Undecafluoro(1,1,1,2,3,3,3-heptafluoropropan-2-yl)cyclohexane                                                                     | 93894-52-1   | FC(F)(F)C(F)(C(F)(F)F)C(F)(F)S(=O)(=O)OS(=O)(=O)C(F)(F)C(F)(C(F)(F)F)C(F)(F)F         | -8.62 | 54.55 | 2.27 | P | IN  |
| QL02218 | 3,4,4,4-tetrafluoro-3-(trifluoromethyl)but-1-yne                                                                                  | 423-02-9     | FC(F)(F)C(F)(C(F)(F)F)C1(F)C(F)(F)C(F)(F)C(F)(F)C1(F)F                                | -8.58 | 66.67 | 1.91 | P | OUT |
| QL02219 | 2,3,3,3-Tetrafluoro-2-(trifluoromethyl)propanenitrile                                                                             | 24690-53-7   | FC(F)(F)C(F)(C(F)(F)F)C(F)(F)F                                                        | -6.38 | 53.85 | 1.28 | P | IN  |
| QL02220 | 2-Vinylperfluoropropane                                                                                                           | 42532-60-5   | FC(F)(F)C(F)(C(F)(F)F)C(F)(F)F                                                        | -6.66 | 58.33 | 1.28 | P | IN  |
| QL02221 | 3,4,4,4-Tetrafluoro-1-iodo-3-(trifluoromethyl)but-1-ene                                                                           | 88562-41-8   | FC(F)(F)C(F)(C(F)(F)F)C(F)(F)F                                                        | -5.94 | 46.67 | 1.28 | P | IN  |
| QL02223 |                                                                                                                                   | 24716-85-6   | FC(F)(F)C(F)(C(F)(F)F)C(F)(F)F                                                        | -6.66 | 53.33 | 1.42 | P | IN  |
| QL02224 | 1,4-Bis(heptafluoroisopropyl)benzene                                                                                              | 51114-12-6   | FC(F)(F)C(F)(C1=CC=C(C=C1)C(F)(C(F)(F)F)C(F)(F)C(F)(F)F                               | -7.51 | 46.67 | 1.99 | P | IN  |
| QL02225 | AGN-PC-0NHL39                                                                                                                     | 40161-59-9   | FC(F)(F)C(F)(C1=CC=C(I)C=C1)C(F)(F)F                                                  | -6.79 | 38.10 | 1.90 | P | IN  |
| QL02226 | 6-(1,1,1,2,3,3,3-Heptafluoropropan-2-yl)-3-(((pyridin-3-yl)methyl)amino)-3,4-dihydroquinazolin-2(1H)-one                          | 337457-78-0  | FC(F)(F)C(F)(C1=CC2=C(NC(=O)N(C2)NCC2=CN=CC=C2)C=C1)C(F)(F)F                          | -7.28 | 16.67 | 2.72 | P | OUT |
| QL02227 | 3-Chloro-5-(1,1,1,2,3,3,3-heptafluoropropan-2-yl)pyridin-2(1H)-one                                                                | 1771743-43-1 | FC(F)(F)C(F)(C1=CNC(=O)C(Cl)=C1)C(F)(F)F                                              | -6.80 | 38.10 | 1.90 | P | IN  |
| QL02228 | 5-(1,1,1,2,3,3,3-Heptafluoropropan-2-yl)pyrimidine-2,4(1H,3H)-dione                                                               | 80384-59-4   | FC(F)(F)C(F)(C1=CNC(=O)NC1=O)C(F)(F)F                                                 | -6.55 | 33.33 | 1.93 | P | IN  |
| QL02229 | 2-(1,1,1,2,3,3,3-Heptafluoropropan-2-yl)pyridine-4-carbonitrile                                                                   | 929211-36-9  | FC(F)(F)C(F)(C(F)(F)C(F)(F)F)C(F)(F)F                                                 | -6.44 | 33.33 | 1.88 | P | IN  |
| QL02230 | 2-Bromo-1,3-dichloro-5-(1,1,1,2,3,3,3-heptafluoropropan-2-yl)benzene                                                              | 353272-59-0  | FC(F)(F)C(F)(C1cc(Cl)c(Br)c(Cl)c1)C(F)(F)F                                            | -7.37 | 47.62 | 1.90 | P | IN  |

|         |                                                                            |              |                                                                          |       |       |      |   |     |
|---------|----------------------------------------------------------------------------|--------------|--------------------------------------------------------------------------|-------|-------|------|---|-----|
| QL02231 | 1-Bromo-4-(1,1,1,2,3,3,3-heptafluoropropan-2-yl)benzene                    | 2396-23-8    | FC(F)(F)C(F)(c1ccc(Br)cc1)C(F)(F)F                                       | -6.79 | 38.10 | 1.90 | P | IN  |
| QL02232 | 4-(1,1,1,2,3,3,3-Heptafluoropropan-2-yl)benzaldehyde                       | 875306-42-6  | FC(F)(F)C(F)(c1ccc(C=O)cc1)C(F)(F)F                                      | -6.86 | 30.43 | 2.15 | P | IN  |
| QL02233 | 1-(Chloromethyl)-4-(1,1,1,2,3,3,3-heptafluoropropan-2-yl)benzene           | 75462-58-7   | FC(F)(F)C(F)(c1ccc(CCl)cc1)C(F)(F)F                                      | -7.04 | 33.33 | 2.15 | P | IN  |
| QL02234 | 2-Chloro-5-(1,1,1,2,3,3,3-heptafluoropropan-2-yl)pyridine                  | 1807450-20-9 | FC(F)(F)C(F)(c1ccc(Cl)nc1)C(F)(F)F                                       | -6.91 | 40.00 | 1.90 | P | IN  |
| QL02235 | 2-(1,1,1,2,3,3,3-Heptafluoropropan-2-yl)naphthalene                        | 51114-14-8   | FC(F)(F)C(F)(c1ccc2ccccc2c1)C(F)(F)F                                     | -6.53 | 25.93 | 2.12 | P | OUT |
| QL02236 | 5-(1,1,1,2,3,3,3-Heptafluoropropan-2-yl)-1,3-dihydro-2H-benzimidazol-2-one | 1433216-51-3 | FC(F)(F)C(F)(c1ccc2NC(=O)Nc2c1)C(F)(F)F                                  | -6.65 | 28.00 | 2.12 | P | OUT |
| QL02237 | 6-(1,1,1,2,3,3,3-Heptafluoropropan-2-yl)-1,3-benzoxazol-2(3H)-one          | 1248393-88-5 | FC(F)(F)C(F)(c1ccc2NC(=O)Oc2c1)C(F)(F)F                                  | -6.73 | 29.17 | 2.12 | P | IN  |
| QL02238 | 6-(1,1,1,2,3,3,3-Heptafluoropropan-2-yl)-1,3-benzothiazol-2(3H)-one        | 1433216-60-4 | FC(F)(F)C(F)(c1ccc2NC(=O)Sc2c1)C(F)(F)F                                  | -6.73 | 29.17 | 2.12 | P | IN  |
| QL02239 | 5-(1,1,1,2,3,3,3-Heptafluoropropan-2-yl)-2,3-dihydro-1H-indole             | 273735-78-7  | FC(F)(F)C(F)(c1ccc2NCCc2c1)C(F)(F)F                                      | -5.98 | 25.93 | 1.87 | P | OUT |
| QL02240 | 5-(1,1,1,2,3,3,3-Heptafluoropropan-2-yl)-1H-indazole                       | 1433216-39-7 | FC(F)(F)C(F)(c1ccc2Nncc2c1)C(F)(F)F                                      | -6.18 | 29.17 | 1.87 | P | IN  |
| QL02241 | 6-(1,1,1,2,3,3,3-Heptafluoropropan-2-yl)-1H-benzotriazole                  | 1433216-34-2 | FC(F)(F)C(F)(c1ccc2nnNc2c1)C(F)(F)F                                      | -6.25 | 30.43 | 1.87 | P | IN  |
| QL02242 | 1-Bromo-3-(1,1,1,2,3,3,3-heptafluoropropan-2-yl)benzene                    | 2396-22-7    | FC(F)(F)C(F)(c1cccc(Br)c1)C(F)(F)F                                       | -6.37 | 38.10 | 1.71 | P | IN  |
| QL02243 | (1,1,1,2,3,3,3-Heptafluoropropan-2-yl)benzene                              | 378-34-7     | FC(F)(F)C(F)(c1ccccc1)C(F)(F)F                                           | -6.16 | 33.33 | 1.75 | P | IN  |
| QL02244 | 1-(1,1,1,2,3,3,3-Heptafluoropropan-2-yl)-2-iodocyclohexane                 | 4316-00-1    | FC(F)(F)C(F)(C1CCCCC1)C(F)(F)F                                           | -5.91 | 29.63 | 1.74 | P | IN  |
| QL02245 | 2-Chloro-3-(1,1,1,2,3,3,3-heptafluoropropan-2-yl)pyridine                  | 1816284-43-1 | FC(F)(F)C(F)(c1cccnc1Cl)C(F)(F)F                                         | -6.55 | 40.00 | 1.74 | P | IN  |
| QL02246 | 2-Chloro-4-(1,1,1,2,3,3,3-heptafluoropropan-2-yl)pyridine                  | 1816286-71-1 | FC(F)(F)C(F)(c1ccnc(Cl)c1)C(F)(F)F                                       | -6.49 | 40.00 | 1.71 | P | IN  |
| QL02247 | 3-Bromo-5-(1,1,1,2,3,3,3-heptafluoropropan-2-yl)pyridine                   | 1816285-38-7 | FC(F)(F)C(F)(c1cncc(Br)c1)C(F)(F)F                                       | -6.49 | 40.00 | 1.71 | P | IN  |
| QL02248 | 2,4,6-Tris(1,1,1,2,3,3,3-heptafluoropropan-2-yl)-1,3,5-triazine            | 10271-37-1   | FC(F)(F)C(F)(c1nc(nc(n1)C(F)(C(F)(F)C(F)(F)C(F)(C(F)(F)F)C(F)(F)C(F)(F)F | -7.66 | 58.33 | 1.73 | P | IN  |
| QL02249 | 2-(1,1,1,2,3,3,3-Heptafluoropropan-2-yl)-1H-imidazole                      | 81790-00-3   | FC(F)(F)C(F)(c1Nccn1)C(F)(F)F                                            | -5.72 | 38.89 | 1.40 | P | IN  |
| QL02250 | 5-(1,1,1,2,3,3,3-Heptafluoropropan-2-yl)-1H-imidazole                      | 81790-01-4   | FC(F)(F)C(F)(c1Ncnc1)C(F)(F)F                                            | -5.72 | 38.89 | 1.40 | P | IN  |

|         |                                                                                                                                     |              |                                                                                                                                                                                                                                               |        |       |      |   |     |
|---------|-------------------------------------------------------------------------------------------------------------------------------------|--------------|-----------------------------------------------------------------------------------------------------------------------------------------------------------------------------------------------------------------------------------------------|--------|-------|------|---|-----|
| QL02251 | 3,4,4,4-Tetrafluoro-1-phenyl-3-(trifluoromethyl)butan-1-one                                                                         | 82959-21-5   | FC(F)(F)C(F)(CC(=O)c1ccccc1)C(F)(F)F                                                                                                                                                                                                          | -6.54  | 26.92 | 2.10 | P | OUT |
| QL02252 | 3,4,4,4-Tetrafluoro-3-(trifluoromethyl)butanal                                                                                      | 131118-41-7  | FC(F)(F)C(F)(CC=O)C(F)(F)F                                                                                                                                                                                                                    | -6.07  | 43.75 | 1.42 | P | IN  |
| QL02253 | [2,3,3,3-Tetrafluoro-2-(trifluoromethyl)propyl]oxirane                                                                              | 74328-57-7   | FC(F)(F)C(F)(CC1CO1)C(F)(F)F                                                                                                                                                                                                                  | -5.55  | 36.84 | 1.38 | P | IN  |
| QL02254 | 4-Bromo-1,1,1,2-tetrafluoro-2-(trifluoromethyl)butane                                                                               | 1274903-97-7 | FC(F)(F)C(F)(CCBr)C(F)(F)F                                                                                                                                                                                                                    | -6.27  | 47.06 | 1.42 | P | IN  |
| QL02255 | 2,4-Bis[3,4,4,4-tetrafluoro-3-(trifluoromethyl)butyl]-1lambda~6~-3lambda~6~-dithietane-1,1,3,3-tetrone                              | 1346175-94-7 | FC(F)(F)C(F)(CCC1S(=O)(=O)C(CCC(F)(C(F)F)C(F)F)S1(=O)=O)C(F)(F)F                                                                                                                                                                              | -7.68  | 33.33 | 2.44 | P | IN  |
| QL02256 | 1,1,1,2-Tetrafluoro-6-iodo-2-(trifluoromethyl)hexane                                                                                | 99324-97-7   | FC(F)(F)C(F)(CCCCI)C(F)(F)F                                                                                                                                                                                                                   | -6.35  | 34.78 | 1.80 | P | IN  |
| QL02257 | 2-(2-Iodoethyl)perfluoropropane                                                                                                     | 99324-96-6   | FC(F)(F)C(F)(CCI)C(F)(F)F                                                                                                                                                                                                                     | -6.27  | 47.06 | 1.42 | P | IN  |
| QL02258 | 4-(Ethenyloxy)-1,1,1,2-tetrafluoro-2-(trifluoromethyl)butane                                                                        | 90999-86-3   | FC(F)(F)C(F)(CCOC=C)C(F)(F)F                                                                                                                                                                                                                  | -6.17  | 31.82 | 1.80 | P | IN  |
| QL02259 | 2,3-Dichloro-1,1,1,2,3,4,5,5,5-nonafluoro-4-(trifluoromethyl)pentane                                                                | 85720-79-2   | FC(F)(F)C(F)(Cl)C(F)(Cl)C(F)(C(F)(F)F)C(F)(F)F                                                                                                                                                                                                | -8.36  | 70.00 | 1.72 | P | OUT |
| QL02260 | 2,3-Dichlorooctafluorobutane                                                                                                        | NOCAS_870512 | FC(F)(F)C(F)(Cl)C(F)(Cl)C(F)(F)F                                                                                                                                                                                                              | -7.84  | 71.43 | 1.45 | P | OUT |
| QL02261 | 1,2-Dichlorohexafluoropropane                                                                                                       | 661-97-2     | FC(F)(F)C(F)(Cl)C(F)(F)Cl                                                                                                                                                                                                                     | -7.64  | 72.73 | 1.32 | P | OUT |
| QL02262 | 2λ5,4λ5,6λ5-1,3,5,2,4,6-Triazatriphosphorine, 2,2,4,4,6,6-hexakis[2,3,3,3-tetrafluoro-2-(1,1,2,2,3,3,3-heptafluoropropoxy)propoxy]- | 1383437-42-0 | FC(F)(F)C(F)(COP1(OCC(F)(OC(F)(F)C(F)(OC(F)(F)C(F)(F)C(F)(F)C(F)(F)F)=NP(OCC(F)(OC(F)(F)C(F)(OC(F)(F)C(F)(F)C(F)(F)C(F)(F)F)=NP(OCC(F)(OC(F)(F)C(F)(OC(F)(F)C(F)(F)C(F)(F)C(F)(F)C(F)(F)F)(OCC(F)(OC(F)(F)C(F)(OC(F)(F)C(F)(F)C(F)(F)C(F)(F)F | -11.07 | 53.13 | 3.41 | P | OUT |
| QL02263 | Perfluoro-2-methyl-3-(propan-2-yl)pentan-3-yl                                                                                       | 93683-27-3   | FC(F)(F)C(F)(F)[C](C(F)(C(F)(F)F)C(F)(F)F)C(F)(F)C(F)(F)C(F)(F)F                                                                                                                                                                              | -7.79  | 67.86 | 1.53 | P | OUT |
| QL02264 | Perfluoro-2-methyl-3-pentanone                                                                                                      | 756-13-8     | FC(F)(F)C(F)(F)C(=O)C(F)(C(F)(F)F)C(F)(F)F                                                                                                                                                                                                    | -7.84  | 63.16 | 1.68 | P | IN  |
| QL02265 | 1,1,1,2,2,4,4,5,5,5-Decafluoro-3-pentanone                                                                                          | 684-32-2     | FC(F)(F)C(F)(F)C(=O)C(F)(F)C(F)(F)F                                                                                                                                                                                                           | -7.99  | 62.50 | 1.76 | P | IN  |
| QL02266 | 1-(2,2,3,3,3-Pentafluoro-1-oxopropyl)-1H-imidazole                                                                                  | 71735-32-5   | FC(F)(F)C(F)(F)C(=O)N1C=CN=C1                                                                                                                                                                                                                 | -6.05  | 29.41 | 1.81 | P | IN  |
| QL02267 | Pentafluoropropanoic anhydride                                                                                                      | NOCAS_870515 | FC(F)(F)C(F)(F)C(=O)OC(=O)C(F)(F)C(F)(F)F                                                                                                                                                                                                     | -8.10  | 52.63 | 2.09 | P | IN  |
| QL02268 | Perfluoro(3-ethyl-2,3-dimethylpentane)                                                                                              | 50285-19-3   | FC(F)(F)C(F)(F)C(C(F)(F)F)(C(F)(F)C(F)(F)F)C(F)(C(F)(F)F)C(F)(F)F                                                                                                                                                                             | -8.06  | 68.97 | 1.62 | P | OUT |
| QL02269 | 3,3-Bis(trifluoromethyl)perfluoropentane                                                                                            | 36591-89-6   | FC(F)(F)C(F)(F)C(C(F)(F)F)(C(F)(F)F)C(F)(F)C(F)(F)F                                                                                                                                                                                           | -8.13  | 69.57 | 1.63 | P | OUT |
| QL02270 | 3,3-Dichloro-1,1,1,2,2-pentafluoropropane                                                                                           | 422-56-0     | FC(F)(F)C(F)(F)C(Cl)Cl                                                                                                                                                                                                                        | -7.17  | 63.64 | 1.36 | P | OUT |
| QL02271 | Perfluoro dimethylethylpentane                                                                                                      | 50285-18-2   | FC(F)(F)C(F)(F)C(F)(C(F)(C(F)(F)F)C(F)(F)F)C(F)(C(F)(F)F)C(F)(F)F                                                                                                                                                                             | -7.98  | 68.97 | 1.58 | P | OUT |
| QL02272 | Perfluoro-2-methyl-3-ethylpentane                                                                                                   | 354-97-2     | FC(F)(F)C(F)(F)C(F)(C(F)(F)C(F)(F)F)C(F)(C(F)(F)F)C(F)(F)F                                                                                                                                                                                    | -8.13  | 69.23 | 1.64 | P | OUT |
| QL02273 | Perfluoro-3,4-dimethylhexane                                                                                                        | 1735-48-4    | FC(F)(F)C(F)(F)C(F)(C(F)(F)F)C(F)(C(F)(F)F)C(F)(F)C(F)(F)F                                                                                                                                                                                    | -8.43  | 69.23 | 1.78 | P | OUT |
| QL02274 | Perfluoro-2,3-dimethylpentane                                                                                                       | 335-14-8     | FC(F)(F)C(F)(F)C(C(F)(F)F)C(F)(C(F)(F)F)C(F)(F)F                                                                                                                                                                                              | -8.27  | 69.57 | 1.69 | P | OUT |
| QL02275 | 1,1,1,2,2,3,4,4,5,5,5-Undecafluoro-3-(trifluoromethyl)pentane                                                                       | 865-71-4     | FC(F)(F)C(F)(F)C(F)(C(F)(F)F)C(F)(F)C(F)(F)F                                                                                                                                                                                                  | -8.36  | 70.00 | 1.72 | P | OUT |
| QL02276 | Perfluoro-2-methylbutane                                                                                                            | 594-91-2     | FC(F)(F)C(F)(F)C(C(F)(F)F)C(F)(F)F                                                                                                                                                                                                            | -7.64  | 70.59 | 1.38 | P | OUT |
| QL02277 | Perfluorodecahydro-1-sec-butyl-naphthalene                                                                                          | 118945-64-5  | FC(F)(F)C(F)(F)C(F)(C(F)(F)F)C1(F)C(F)(F)C(F)(F)C(F)(F)C2(F)C(F)(F)C(F)(F)C(F)(F)C(F)(F)C12F                                                                                                                                                  | -8.86  | 65.00 | 2.09 | P | IN  |

|         |                                                                                                                                |             |                                                                                                                            |       |       |      |   |     |
|---------|--------------------------------------------------------------------------------------------------------------------------------|-------------|----------------------------------------------------------------------------------------------------------------------------|-------|-------|------|---|-----|
| QL02278 | Perfluorodecahydro-2-sec-butylinaphthalene (1S,2R)-1-(Heptafluoropropyl)-2-iodocyclohexane                                     | 119141-86-5 | FC(F)(F)C(F)(F)C(F)(C(F)(F)F)C1(F)C(F)(F)C(F)(F)C2(F)C(F)(F)C(F)(F)C(F)(F)C2(F)C1(F)F                                      | -9.51 | 65.00 | 2.38 | P | IN  |
| QL02279 | CIS-1-iodo-2-(HEPTAFLUOROPROPYL)CYCLOHEXANE                                                                                    | 7589-44-8   | FC(F)(F)C(F)(F)C(F)(F)[C@@H]1CCCC[C@H]1I                                                                                   | -6.27 | 29.63 | 1.90 | P | IN  |
| QL02280 | 42 Fluorotelomer unsaturated aldehyde                                                                                          | 7589-43-7   | FC(F)(F)C(F)(F)C(F)(F)[C@H]1CCCC[C@H]1I                                                                                    | -6.27 | 29.63 | 1.90 | P | IN  |
| QL02281 | 1-Bromoheptafluoropropane                                                                                                      | 864551-39-3 | FC(F)(F)C(F)(F)C(F)(F)/C(F)=C/F=O                                                                                          | -7.41 | 47.06 | 1.93 | P | IN  |
| QL02282 |                                                                                                                                | 422-85-5    | FC(F)(F)C(F)(F)C(F)(F)Br                                                                                                   | -7.64 | 72.73 | 1.32 | P | OUT |
| QL02283 | Bis[1,1,1,3,3,4,4,5,5,5-decafluoro-2-(trifluoromethyl)pentan-2-yl]mercury                                                      | 120674-92-2 | FC(F)(F)C(F)(F)C(F)(F)C([Hg]C(C(F)(F)F)(C(F)(F)F)C(F)(F)C(F)(F)C(F)(F)C(F)(F)C(F)(F)F                                      | -9.03 | 66.67 | 2.12 | P | IN  |
| QL02284 | N-Chloro-2,2,3,3,4,4,4-heptafluorobutanimidamide                                                                               | 13050-20-9  | FC(F)(F)C(F)(F)C(F)(F)C(F)C(=N)NCl                                                                                         | -7.38 | 50.00 | 1.84 | P | IN  |
| QL02285 | N'-(Benzenesulfonyl)-2,2,3,3,4,4,4-heptafluorobutanimidohydrazide                                                              | 4454-57-3   | FC(F)(F)C(F)(F)C(F)(F)C(F)C(=N)NNS(=O)(=O)c1ccccc1                                                                         | -7.13 | 22.58 | 2.49 | P | OUT |
| QL02286 | 2-Diazo-4,4,5,5,6,6,6-heptafluoro-1-phenylhexane-1,3-dione                                                                     | 872186-76-0 | FC(F)(F)C(F)(F)C(F)(F)C(F)C(=O)C(=[N+]=[N-])C(=O)c1ccccc1                                                                  | -7.21 | 25.00 | 2.45 | P | OUT |
| QL02287 | 1,2-Pentanedione, 3,3,4,4,5,5,5-heptafluoro-1-phenyl-1-(1-Piperidinyl)-2-(triphenylphosphoranylidene)perfluorohexane-1,3-dione | 69481-44-3  | FC(F)(F)C(F)(F)C(F)(F)C(F)C(=O)C(=O)C1=CC=CC=C1                                                                            | -6.96 | 28.00 | 2.26 | P | OUT |
| QL02288 |                                                                                                                                | 148192-46-5 | FC(F)(F)C(F)(F)C(F)(F)C(F)C(=O)C(C(=O)N1CCCCC1)=P(C1=CC=CC=C1)(C1=CC=CC=C1)C1=CC=CC=C1                                     | -6.03 | 10.77 | 2.32 | P | OUT |
| QL02289 | 1,1,1,2,4,4,5,5,6,6,6-Undecafluoro-2-(trifluoromethyl)-3-hexanone                                                              | 813-45-6    | FC(F)(F)C(F)(F)C(F)(F)C(F)C(=O)C(F)(C(F)(F)F)C(F)(F)F                                                                      | -8.23 | 63.64 | 1.84 | P | IN  |
| QL02290 | 4,4,5,5,6,6,6-Heptafluoro-1-phenylhex-1-yn-3-one                                                                               | 67036-08-2  | FC(F)(F)C(F)(F)C(F)(F)C(F)C(=O)C#CC1=CC=CC=C1                                                                              | -7.32 | 28.00 | 2.42 | P | OUT |
| QL02291 | 1-Anilino-4,4,5,5,6,6,6-heptafluorohex-1-en-3-one                                                                              | 34648-00-5  | FC(F)(F)C(F)(F)C(F)(F)C(F)C(=O)C=CNC1=CC=CC=C1                                                                             | -7.23 | 24.14 | 2.49 | P | OUT |
| QL02292 | 1-(3,5-Dibromophenyl)-2,2,3,3,4,4,4-heptafluorobutan-1-one                                                                     | 79851-20-0  | FC(F)(F)C(F)(F)C(F)(F)C(F)C(=O)C1=CC(Br)=CC(Br)=C1                                                                         | -7.40 | 39.13 | 2.15 | P | IN  |
| QL02293 | 2,2,3,3,4,4,4-heptafluoro-1-phenylbutan-1-one                                                                                  | 559-91-1    | FC(F)(F)C(F)(F)C(F)(F)C(F)C(=O)C1=CC=CC=C1                                                                                 | -6.92 | 30.43 | 2.17 | P | IN  |
| QL02294 | 2-(2,2,3,3,4,4,4-Heptafluorobutanoyl)cyclopentan-1-one                                                                         | 141478-83-3 | FC(F)(F)C(F)(F)C(F)(F)C(F)C(=O)C1CCCC1=O                                                                                   | -6.18 | 28.00 | 1.91 | P | OUT |
| QL02295 | 2-(2,2,3,3,4,4,4-Heptafluorobutanoyl)cyclohexan-1-one                                                                          | 37172-87-5  | FC(F)(F)C(F)(F)C(F)(F)C(F)C(=O)C1CCCCC1=O                                                                                  | -6.53 | 25.00 | 2.15 | P | OUT |
| QL02296 | 5H,5H-Perfluoro-4,6-nonanedione                                                                                                | 113116-18-0 | FC(F)(F)C(F)(F)C(F)(F)C(F)C(=O)CC(=O)C(F)(F)C(F)(F)C(F)(F)F                                                                | -8.71 | 51.85 | 2.38 | P | IN  |
| QL02297 | 4,4''-Bis((perfluoropropyl)-1,3-dioxopropyl)-o-terphenyl-4'-sulfonyl chloride                                                  | 200862-70-0 | FC(F)(F)C(F)(F)C(F)(F)C(F)C(=O)CC(=O)C1=CC=C(C=C1)C1=C(C=C(C=C1)S(Cl)(=O)=O)C1=CC=C(C=C1)C(=O)CC(=O)C(F)(F)C(F)(F)C(F)(F)F | -9.33 | 22.39 | 3.48 | P | OUT |
| QL02298 | 4,4,5,5,6,6,6-Heptafluoro-1-phenylhexane-1,3-dione                                                                             | 53580-21-5  | FC(F)(F)C(F)(F)C(F)(F)C(F)C(=O)CC(=O)C1=CC=CC=C1                                                                           | -7.15 | 25.00 | 2.43 | P | OUT |
| QL02299 | 4,4,5,5,6,6,6-Heptafluoro-1-(furan-2-yl)hexane-1,3-dione                                                                       | 595-26-6    | FC(F)(F)C(F)(F)C(F)(F)C(F)C(=O)CC(=O)C1=CC=CO1                                                                             | -6.92 | 28.00 | 2.24 | P | OUT |
| QL02300 | (Perfluorobutyl)-2-thenoylmethane                                                                                              | 559-94-4    | FC(F)(F)C(F)(F)C(F)(F)C(F)C(=O)CC(=O)C1=CC=CS1                                                                             | -6.92 | 28.00 | 2.24 | P | OUT |
| QL02301 | 3,3,4,4,5,5,5-Heptafluoro-1-phenylpentan-2-one                                                                                 | 559-96-6    | FC(F)(F)C(F)(F)C(F)(F)C(F)C(=O)CC1=CC=CC=C1                                                                                | -6.87 | 26.92 | 2.25 | P | OUT |
| QL02302 | 3,3,4,4,5,5,5-heptafluoro-1-pyridin-2-ylpentan-2-one                                                                           | 336-60-7    | FC(F)(F)C(F)(F)C(F)(F)C(F)C(=O)CC1=CC=CC=N1                                                                                | -6.94 | 28.00 | 2.25 | P | OUT |

|         |                                                                                            |             |                                                                                     |       |       |      |   |     |
|---------|--------------------------------------------------------------------------------------------|-------------|-------------------------------------------------------------------------------------|-------|-------|------|---|-----|
| QL02303 | N,N-Dicyclohexyl-2,2,3,3,4,4,4-heptafluorobutanamide                                       | 386-84-5    | FC(F)(F)C(F)(F)C(F)(F)C(=O)N(C1CCCCC1)C1CCCCC1                                      | -6.04 | 14.89 | 2.21 | P | OUT |
| QL02304 | N,N-Dichloro-2,2,3,3,4,4,4-heptafluorobutanamide                                           | 86451-48-1  | FC(F)(F)C(F)(F)C(F)(F)C(=O)N(Cl)Cl                                                  | -7.97 | 60.00 | 1.83 | P | IN  |
| QL02305 | 1-(Heptafluorobutyl)imidazole                                                              | 32477-35-3  | FC(F)(F)C(F)(F)C(F)(F)C(=O)N1C=CN=C1                                                | -6.64 | 35.00 | 1.92 | P | IN  |
| QL02306 | N-Heptafluorobutylproline                                                                  | 56236-41-0  | FC(F)(F)C(F)(F)C(F)(F)C(=O)N1CCC[C@H]1C(Cl)=O                                       | -6.81 | 29.63 | 2.15 | P | IN  |
| QL02307 | 1-(2,3-Dihydro-1H-indol-1-yl)-2,2,3,3,4,4,4-heptafluoro-1-butanone                         | 543708-46-9 | FC(F)(F)C(F)(F)C(F)(F)C(=O)N1CCC2=CC=CC=C12                                         | -6.69 | 24.14 | 2.24 | P | OUT |
| QL02308 | 2,2,3,3,4,4,4-heptafluoro-1-pyrrolidin-1-ylbutan-1-one                                     | 424-54-4    | FC(F)(F)C(F)(F)C(F)(F)C(=O)N1CCCC1                                                  | -6.21 | 28.00 | 1.92 | P | OUT |
| QL02309 | 2,2,3,3,4,4,4-Heptafluoro-1-(piperidin-1-yl)butan-1-one                                    | 425-19-4    | FC(F)(F)C(F)(F)C(F)(F)C(=O)N1CCCCC1                                                 | -6.58 | 25.00 | 2.17 | P | OUT |
| QL02310 | 1,1'-(Piperazine-1,4-diyl)bis(heptafluorobutan-1-one)                                      | 120219-50-3 | FC(F)(F)C(F)(F)C(F)(F)C(=O)N1CCN(CC1)C(=O)C(F)(F)C(F)(F)C(F)(F)F                    | -8.46 | 36.84 | 2.69 | P | IN  |
| QL02311 | 1-{4-[(2H-1,3-Benzodioxol-5-yl)methyl]piperazin-1-yl}-2,2,3,3,4,4,4-heptafluorobutan-1-one | 546063-97-2 | FC(F)(F)C(F)(F)C(F)(F)C(=O)N1CCN(Cc2ccc3OCOc3c2)CC1                                 | -7.64 | 16.28 | 2.89 | P | OUT |
| QL02312 | 2,2,3,3,4,4,4-Heptafluoro-1-(piperazin-1-yl)butan-1-one                                    | 89245-13-6  | FC(F)(F)C(F)(F)C(F)(F)C(=O)N1CCNCC1                                                 | -6.64 | 25.93 | 2.17 | P | OUT |
| QL02313 | 2,2,3,3,4,4,4-Heptafluoro-1-(morpholin-4-yl)butan-1-one                                    | 425-20-7    | FC(F)(F)C(F)(F)C(F)(F)C(=O)N1CCOCC1                                                 | -6.70 | 26.92 | 2.17 | P | OUT |
| QL02314 | N,N'-1,3-Phenylenebis(perfluorobutanamide)                                                 | 524726-48-5 | FC(F)(F)C(F)(F)C(F)(F)C(=O)NC1=CC(NC(=O)C(F)(F)C(F)(F)C(F)(F)F)=CC=C1               | -8.78 | 36.84 | 2.83 | P | IN  |
| QL02315 | Butanamide, N,N'-(1,1'-biphenyl)-4,4'-diylbis(2,2,3,3,4,4,4-heptafluoro-                   | 75042-07-8  | FC(F)(F)C(F)(F)C(F)(F)C(=O)NC1=CC=C(C=C1)C1=CC=C(NC(=O)C(F)(F)C(F)(F)C(F)(F)F)C=C1  | -9.08 | 29.17 | 3.18 | P | OUT |
| QL02316 | N,N'-(Methylenedi-1,4-phenylene)bis(perfluorobutanamide)                                   | 124232-75-3 | FC(F)(F)C(F)(F)C(F)(F)C(=O)NC1=CC=C(CC2=CC=C(NC(=O)C(F)(F)C(F)(F)C(F)(F)F)C=C2)C=C1 | -9.17 | 27.45 | 3.27 | P | OUT |
| QL02317 | N,N'-1,4-Phenylenebis(perfluorobutanamide)                                                 | 524726-49-6 | FC(F)(F)C(F)(F)C(F)(F)C(=O)NC1=CC=C(NC(=O)C(F)(F)C(F)(F)C(F)(F)F)C=C1               | -8.84 | 36.84 | 2.86 | P | IN  |
| QL02318 | AI 3-18011                                                                                 | 336-61-8    | FC(F)(F)C(F)(F)C(F)(F)C(=O)NC1=CC=CC=C1                                             | -6.94 | 28.00 | 2.25 | P | OUT |
| QL02319 | Thiobenzyl N-heptafluorobutylanthranilate                                                  | 82422-25-1  | FC(F)(F)C(F)(F)C(F)(F)C(=O)NC1=CC=CC=C1C(=O)SCC1=CC=CC=C1                           | -7.68 | 17.07 | 2.89 | P | OUT |
| QL02320 | N-2-Pyridinylperfluorobutanamide                                                           | 283172-09-8 | FC(F)(F)C(F)(F)C(F)(F)C(=O)NC1=CC=CC=N1                                             | -7.01 | 29.17 | 2.25 | P | OUT |
| QL02321 | 2,2,3,3,4,4,4-Heptafluoro-N-{2-oxo-2,3-dihydropyrimidin-4-yl}butanamide                    | 94720-20-4  | FC(F)(F)C(F)(F)C(F)(F)C(=O)NC1=CC=NC(=O)N1                                          | -7.00 | 29.17 | 2.24 | P | OUT |
| QL02322 | (2-Naphthalenyl)perfluorobutanamide                                                        | 582-00-3    | FC(F)(F)C(F)(F)C(F)(F)C(=O)NC1=CC2=CC=CC=C2C=C1                                     | -7.21 | 22.58 | 2.52 | P | OUT |
| QL02323 | N-(2,6-Dichlorophenyl)-2,2,3,3,4,4,4-heptafluorobutanamide                                 | 121806-69-7 | FC(F)(F)C(F)(F)C(F)(F)C(=O)Nc1c(Cl)cccc1Cl                                          | -7.33 | 36.00 | 2.20 | P | IN  |
| QL02324 | 2,2,3,3,4,4,4-Heptafluoro-N-{2,4,5-trichlorophenyl}butanamide                              | 121806-70-0 | FC(F)(F)C(F)(F)C(F)(F)C(=O)Nc1cc(Cl)c(Cl)cc1Cl                                      | -8.03 | 40.00 | 2.41 | P | IN  |
| QL02325 | N-(2,5-Dichlorophenyl)-2,2,3,3,4,4,4-heptafluorobutanamide                                 | 121806-67-5 | FC(F)(F)C(F)(F)C(F)(F)C(=O)Nc1cc(Cl)cccc1Cl                                         | -7.38 | 36.00 | 2.23 | P | IN  |
| QL02326 | N-(4-Bromophenyl)-2,2,3,3,4,4,4-heptafluorobutanamide                                      | 308-67-8    | FC(F)(F)C(F)(F)C(F)(F)C(=O)Nc1ccc(Br)cc1                                            | -7.61 | 32.00 | 2.44 | P | IN  |
| QL02327 | N-(4-Chlorophenyl)-2,2,3,3,4,4,4-heptafluorobutanamide                                     | 79497-98-6  | FC(F)(F)C(F)(F)C(F)(F)C(=O)Nc1ccc(Cl)cc1                                            | -7.61 | 32.00 | 2.44 | P | IN  |

|         |                                                                                             |              |                                                                  |       |       |      |   |     |
|---------|---------------------------------------------------------------------------------------------|--------------|------------------------------------------------------------------|-------|-------|------|---|-----|
| QL02328 | N-(2,4-Dichlorophenyl)-<br>2,2,3,3,4,4,4-<br>heptafluorobutanamide                          | 121806-66-4  | FC(F)(F)C(F)(F)C(F)(F)C(=O)Nc1cccc(Cl)cc1Cl                      | -7.80 | 36.00 | 2.42 | P | IN  |
| QL02329 | N-(3-Chlorophenyl)-2,2,3,3,4,4,4-<br>heptafluorobutanamide                                  | 106376-36-7  | FC(F)(F)C(F)(F)C(F)(F)C(=O)Nc1cccc(Cl)c1                         | -7.17 | 32.00 | 2.24 | P | IN  |
| QL02330 | N-(2,3-Dichlorophenyl)-<br>2,2,3,3,4,4,4-<br>heptafluorobutanamide                          | 121806-68-6  | FC(F)(F)C(F)(F)C(F)(F)C(=O)Nc1cccc(Cl)c1Cl                       | -7.38 | 36.00 | 2.23 | P | IN  |
| QL02331 | N-(9,10-Dioxo-9,10-<br>dihydroanthracen-1-yl)-<br>2,2,3,3,4,4,4-<br>heptafluorobutanamide   | 162441-56-7  | FC(F)(F)C(F)(F)C(F)(F)C(=O)Nc1cccc2C(=O)c3cccc3C(=O)c12          | -7.32 | 18.92 | 2.67 | P | OUT |
| QL02332 | N-Cyclohexyl-2,2,3,3,4,4,4-<br>heptafluorobutanamide                                        | 56663-38-8   | FC(F)(F)C(F)(F)C(F)(F)C(=O)NC1CCCCC1                             | -6.60 | 22.58 | 2.25 | P | OUT |
| QL02333 | N-(2-Chlorophenyl)-2,2,3,3,4,4,4-<br>heptafluorobutanamide                                  | 121806-65-3  | FC(F)(F)C(F)(F)C(F)(F)C(=O)Nc1cccc1Cl                            | -7.14 | 32.00 | 2.23 | P | IN  |
| QL02334 | 2,2,3,3,4,4-Heptafluoro-N-(2-<br>iodophenyl)butanamide                                      | 378215-44-2  | FC(F)(F)C(F)(F)C(F)(F)C(=O)Nc1cccc1I                             | -7.14 | 32.00 | 2.23 | P | IN  |
| QL02335 | (1R-trans)-N,N'-1,2-<br>Cyclohexanediylbis(perfluorobuta<br>namide)                         | 133964-60-0  | FC(F)(F)C(F)(F)C(F)(F)C(=O)NC1CCCCC1NC(=O)C(F)(F)C(F)(F)C(F)(F)F | -8.25 | 31.82 | 2.73 | P | OUT |
| QL02336 | 2,2,3,3,4,4,4-Heptafluoro-N-(1H-<br>1,2,4-triazol-5-yl)butanamide                           | 70501-47-2   | FC(F)(F)C(F)(F)C(F)(F)C(=O)Nc1Nncn1                              | -7.09 | 33.33 | 2.17 | P | IN  |
| QL02337 | Allylperfluorobutanamide                                                                    | 24429-61-6   | FC(F)(F)C(F)(F)C(F)(F)C(=O)NCC=C                                 | -7.07 | 31.82 | 2.20 | P | IN  |
| QL02338 | N-<br>(Phenylmethyl)perfluorobutanami<br>de                                                 | 560-02-1     | FC(F)(F)C(F)(F)C(F)(F)C(=O)NCC1=CC=CC=C1                         | -7.14 | 25.00 | 2.42 | P | OUT |
| QL02339 | 2,2,3,3,4,4,4-Heptafluoro-N-(2-<br>phenylethyl)butanamide                                   | 29723-29-3   | FC(F)(F)C(F)(F)C(F)(F)C(=O)NCCC1=CC=CC=C1                        | -7.14 | 22.58 | 2.49 | P | OUT |
| QL02340 | 2,2,3,3,4,4,4-Heptafluoro-N-(3-<br>phenylpropyl)butanamide                                  | 77970-73-1   | FC(F)(F)C(F)(F)C(F)(F)C(=O)NCCCC1CCCCC1                          | -7.35 | 20.59 | 2.64 | P | OUT |
| QL02341 | N,N'-bis(Perfluorobutanoyl)1,6-<br>hexanediamine                                            | 123665-83-8  | FC(F)(F)C(F)(F)C(F)(F)C(=O)NCCCCCNC(=O)C(F)(F)C(F)(F)C(F)(F)F    | -8.72 | 30.43 | 2.98 | P | OUT |
| QL02342 | N,N'-bis(Perfluorobutanoyl)1,5-<br>pentanediamine                                           | 1814-80-8    | FC(F)(F)C(F)(F)C(F)(F)C(=O)NCCCCCNC(=O)C(F)(F)C(F)(F)C(F)(F)F    | -8.75 | 32.56 | 2.94 | P | OUT |
| QL02343 | N,N'-bis(Perfluorobutanoyl)1,4-<br>butanediamine                                            | 2967-59-1    | FC(F)(F)C(F)(F)C(F)(F)C(=O)NCCCCCNC(=O)C(F)(F)C(F)(F)C(F)(F)F    | -8.64 | 35.00 | 2.82 | P | IN  |
| QL02344 | n-(2-chloroethyl)-2,2,3,3,4,4,4-<br>heptafluorobutanamide                                   | 4314-29-8    | FC(F)(F)C(F)(F)C(F)(F)C(=O)NCCCl                                 | -7.46 | 38.10 | 2.20 | P | IN  |
| QL02345 | N,N'-bis(Perfluorobutanoyl)1,3-<br>propanediamine                                           | 149981-59-9  | FC(F)(F)C(F)(F)C(F)(F)C(=O)NCCCCCNC(=O)C(F)(F)C(F)(F)C(F)(F)F    | -8.70 | 37.84 | 2.77 | P | IN  |
| QL02346 | ST50925188                                                                                  | 86273-64-5   | FC(F)(F)C(F)(F)C(F)(F)C(=O)NCCNC(=O)C(F)(F)C(F)(F)C(F)(F)F       | -8.63 | 41.18 | 2.65 | P | IN  |
| QL02347 | N'-Benzylidene-2,2,3,3,4,4,4-<br>heptafluorobutanehydrazide                                 | 736-62-9     | FC(F)(F)C(F)(F)C(F)(F)C(=O)NN=Cc1cccc1                           | -7.28 | 25.00 | 2.49 | P | OUT |
| QL02348 | 2,2,3,3,4,4,4-Heptafluoro-N'-<br>[(pyridin-4-<br>yl)methylidene]butanehydrazide             | 109373-81-1  | FC(F)(F)C(F)(F)C(F)(F)C(=O)NN=Cc1cnccc1                          | -7.34 | 25.93 | 2.49 | P | OUT |
| QL02349 | 2,2,3,3,4,4,4-heptafluoro-n'-<br>(2,2,3,3,4,4,4-<br>heptafluorobutanoyl)butanehydra<br>zide | 648-19-1     | FC(F)(F)C(F)(F)C(F)(F)C(=O)NNC(=O)C(F)(F)C(F)(F)C(F)(F)F         | -8.74 | 50.00 | 2.45 | P | IN  |
| QL02350 | 2,2,3,3,4,4,4-Heptafluoro-N'-<br>phenylbutanehydrazide                                      | 77146-66-8   | FC(F)(F)C(F)(F)C(F)(F)C(=O)NNc1cccc1                             | -7.20 | 25.93 | 2.42 | P | OUT |
| QL02351 | 4-Chlorophenyl (2,2,3,3,4,4,4-<br>heptafluorobutanoyl)sulfamate                             | 1443258-17-0 | FC(F)(F)C(F)(F)C(F)(F)C(=O)NS(=O)(=O)Oc1ccc(Cl)cc1               | -7.88 | 27.59 | 2.68 | P | OUT |
| QL02352 | Heptafluorobutanoic anhydride                                                               | NOCAS_861881 | FC(F)(F)C(F)(F)C(F)(F)C(=O)OC(=O)C(F)(F)C(F)(F)C(F)(F)F          | -8.96 | 56.00 | 2.38 | P | IN  |
| QL02353 | 1,1,1,3,3,3-Hexafluoro-2-<br>(trifluoromethyl)propan-2-yl<br>heptafluorobutanoate           | 922168-38-5  | FC(F)(F)C(F)(F)C(F)(F)C(=O)OC(C(F)(F)F)(C(F)(F)F)C(F)(F)F        | -8.36 | 61.54 | 1.96 | P | IN  |

|         |                                                                                                 |              |                                                                                                                                           |       |       |      |   |     |
|---------|-------------------------------------------------------------------------------------------------|--------------|-------------------------------------------------------------------------------------------------------------------------------------------|-------|-------|------|---|-----|
| QL02354 | Vinyl perfluorobutyrate                                                                         | 356-28-5     | FC(F)(F)C(F)(F)C(F)(F)C(=O)OC=C                                                                                                           | -6.91 | 38.89 | 1.93 | P | IN  |
| QL02355 | Decane-1,10-diyl                                                                                | 426-64-2     | FC(F)(F)C(F)(F)C(F)(F)C(=O)OCCCCCCCCCOC(=O)C(F)(F)C(F)(F)C(F)(F)F                                                                         | -9.01 | 25.00 | 3.27 | P | OUT |
| QL02356 | bis(heptafluorobutanoate)                                                                       | 336-64-1     | FC(F)(F)C(F)(F)C(F)(F)C(=O)OOC(=O)C(F)(F)C(F)(F)C(F)(F)F                                                                                  | -8.98 | 53.85 | 2.45 | P | IN  |
| QL02357 | 2,2,3,3,4,4,4-Heptafluoro-1-(morpholin-4-yl)butane-1-thione                                     | 1206684-15-2 | FC(F)(F)C(F)(F)C(F)(F)C(=S)N1CCOCC1                                                                                                       | -6.70 | 26.92 | 2.17 | P | OUT |
| QL02358 | 2,2,3,3,4,4,4-Heptafluoro-N-phenylbutanethioamide                                               | 61881-12-7   | FC(F)(F)C(F)(F)C(F)(F)C(=S)NC1=CC=CC=C1                                                                                                   | -6.94 | 28.00 | 2.25 | P | OUT |
| QL02359 | 2-bromo-1,1,1,3,3,4,4,5,5,5-decafluoro-2-(trifluoromethyl)pentane                               | 22528-67-2   | FC(F)(F)C(F)(F)C(F)(F)C(Br)(C(F)(F)F)C(F)(F)F                                                                                             | -8.36 | 70.00 | 1.72 | P | OUT |
| QL02360 | 2-bromo-3,3,4,4,5,5,5-heptafluoropent-1-ene                                                     | 96916-53-9   | FC(F)(F)C(F)(F)C(F)(F)C(Br)=C                                                                                                             | -6.75 | 53.33 | 1.46 | P | IN  |
| QL02361 | heptafluorobutanoyl bromide                                                                     | 375-13-3     | FC(F)(F)C(F)(F)C(F)(F)C(Br)=O                                                                                                             | -7.26 | 61.54 | 1.46 | P | IN  |
| QL02362 | 4,5-Dibromo-1,1,1,2,2,3,3-heptafluoropentane                                                    | 377-46-8     | FC(F)(F)C(F)(F)C(F)(F)C(Br)CBr                                                                                                            | -7.56 | 52.94 | 1.84 | P | IN  |
| QL02363 | 1,1,1,2,2,3,3,5,6,6,6-Undecafluoro-4,4,5-tris(trifluoromethyl)hexane                            | 86714-23-0   | FC(F)(F)C(F)(F)C(F)(F)C(C(F)(F)F)(C(F)(F)F)C(F)(C(F)(F)F)C(F)(F)F                                                                         | -8.44 | 68.97 | 1.79 | P | OUT |
| QL02364 | 1,1,1,2,2,3,3,5,5,5-Decafluoro-4,4-bis(trifluoromethyl)pentane                                  | 29971-79-7   | FC(F)(F)C(F)(F)C(F)(F)C(C(F)(F)F)(C(F)(F)F)C(F)(F)F                                                                                       | -8.13 | 69.57 | 1.63 | P | OUT |
| QL02365 | 4,4,5,5,6,6,6-Heptafluoro-3,3-bis(trifluoromethyl)hex-1-ene                                     | 79272-26-7   | FC(F)(F)C(F)(F)C(F)(F)C(C=C)(C(F)(F)F)C(F)(F)F                                                                                            | -7.31 | 54.17 | 1.69 | P | IN  |
| QL02366 | 1-bromo-4,4,5,5,6,6,6-heptafluoro-3,3-bis(trifluoromethyl)hex-1-ene                             | 128454-94-4  | FC(F)(F)C(F)(F)C(F)(F)C(C=CBr)(C(F)(F)F)C(F)(F)F                                                                                          | -7.79 | 58.33 | 1.79 | P | IN  |
| QL02367 | 6,6,7,7,8,8,8-Heptafluoro-5,5-bis(trifluoromethyl)octa-1,3-diene                                | 1429188-77-1 | FC(F)(F)C(F)(F)C(F)(F)C(C=CC=C)(C(F)(F)F)C(F)(F)F                                                                                         | -7.60 | 46.43 | 2.04 | P | IN  |
| QL02368 | 4,4,5,5,6,6,6-heptafluoro-1-iodo-3,3-bis(trifluoromethyl)hex-1-ene                              | 126681-21-8  | FC(F)(F)C(F)(F)C(F)(F)C(C=C)(C(F)(F)F)C(F)(F)F                                                                                            | -7.79 | 58.33 | 1.79 | P | IN  |
| QL02369 | (Perfluoropropyl)-2-(2-phenylhydrazinylidene)ethanal phenylhydrazone                            | 57912-15-9   | FC(F)(F)C(F)(F)C(F)(F)C(C(=NNC1=CC=CC=C1)=NNC1=CC=CC=C1)                                                                                  | -7.21 | 17.07 | 2.68 | P | OUT |
| QL02370 | 2,2'-(2,2,3,3,4,4,4-Heptafluorobutane-1,1-diyl)di(1H-pyrrole)                                   | 164792-01-2  | FC(F)(F)C(F)(F)C(F)(F)C(c1Nccc1)c1Nccc1                                                                                                   | -5.81 | 23.33 | 1.87 | P | OUT |
| QL02371 | 1,1,1,2,2,3,3,10,10,11,11,12,12,12-Tetradecafluoro-4,4,9,9-tetrakis(trifluoromethyl)dodec-6-ene | 1946796-71-9 | FC(F)(F)C(F)(F)C(F)(F)C(CC=CCC(C(F)(F)F)(C(F)(F)F)C(F)(F)C(F)(F)F)C(F)(F)F                                                                | -8.79 | 54.17 | 2.35 | P | IN  |
| QL02372 | Bis(4-[3,3,4,4,5,5,5-heptafluoro-2,2-bis(trifluoromethyl)pentyl]phenyl)(phenyl)phosphane        | 322647-83-6  | FC(F)(F)C(F)(F)C(F)(F)C(CC1=CC=C(C=C1)P(C1=CC=CC=C1)C1=CC=C(CC(C(F)(F)F)(C(F)(F)F)C(F)(F)F)C(F)(F)F)C(F)(F)F                              | -9.14 | 34.21 | 3.07 | P | OUT |
| QL02373 | 1-Bromo-4-[3,3,4,4,5,5,5-heptafluoro-2,2-bis(trifluoromethyl)pentyl]benzene                     | 149068-60-0  | FC(F)(F)C(F)(F)C(F)(F)C(Cc1ccc(Br)cc1)(C(F)(F)F)C(F)(F)F                                                                                  | -7.83 | 42.42 | 2.25 | P | IN  |
| QL02374 | Tris(4-[3,3,4,4,5,5,5-heptafluoro-2,2-bis(trifluoromethyl)pentyl]phenyl)phosphane               | 322647-82-5  | FC(F)(F)C(F)(F)C(F)(F)C(Cc1ccc(cc1)P(c1ccc(CC(C(F)(F)F)(C(F)(F)F)C(F)(F)F)cc1)c1ccc(CC(C(F)(F)F)(C(F)(F)F)C(F)(F)F)cc1)(C(F)(F)F)C(F)(F)F | -9.27 | 40.21 | 2.96 | P | IN  |
| QL02375 | 2-[3,3,4,4,5,5,5-Heptafluoro-2,2-bis(trifluoromethyl)pentyl]oxirane                             | 119285-89-1  | FC(F)(F)C(F)(F)C(F)(F)C(CC1CO1)(C(F)(F)F)C(F)(F)F                                                                                         | -7.11 | 46.43 | 1.81 | P | IN  |
| QL02376 | 6-Bromo-1,1,1,2,2,3,3-heptafluoro-4,4-bis(trifluoromethyl)hexane                                | 128454-91-1  | FC(F)(F)C(F)(F)C(F)(F)C(CBr)(C(F)(F)F)C(F)(F)F                                                                                            | -7.51 | 53.85 | 1.79 | P | IN  |









[illegible]

[illegible]

[illegible]

[illegible]

[illegible]

[illegible]





[illegible]



|         |                                                                                                                  |             |                                                                                                    |        |       |      |   |     |
|---------|------------------------------------------------------------------------------------------------------------------|-------------|----------------------------------------------------------------------------------------------------|--------|-------|------|---|-----|
| QL02656 | 19-Bromo-1,1,1,2,2,3,3,4,4,5,5,6,6,7,7,8,8-heptadecafluorononadecane 4'-                                         | 1597-70-2   | FC(F)(F)C(F)(F)C(F)(F)C(F)(F)C(F)(F)C(F)(F)C(F)(F)C(F)(F)CCCCCCCCCBr                               | -9.58  | 30.51 | 3.37 | P | OUT |
| QL02657 | [(12,12,13,13,14,14,15,15,16,16,17,17,18,18,19,19,19-Heptadecafluorononadecyl)oxy][1,1'-biphenyl]-4-carbonitrile | 117750-26-2 | FC(F)(F)C(F)(F)C(F)(F)C(F)(F)C(F)(F)C(F)(F)C(F)(F)C(F)(F)C(F)(F)CCCCCCCCCOC1ccc(cc1)-c1ccc(cc1)C#N | -10.12 | 20.99 | 3.88 | P | OUT |
| QL02658 | (11-(F-Octyl)undecyl)dimorpholinophosphoramidate                                                                 | 134051-92-6 | FC(F)(F)C(F)(F)C(F)(F)C(F)(F)C(F)(F)C(F)(F)C(F)(F)C(F)(F)CCCCCCCCCOP(=O)(N1CCOCC1)N1CCOCC1         | -9.27  | 19.10 | 3.55 | P | OUT |
| QL02659 | 1,1,1,2,2,3,3,4,4,5,5,6,6,7,7,8,8-Heptadecafluoro-12-iodododecane                                                | 38565-62-7  | FC(F)(F)C(F)(F)C(F)(F)C(F)(F)C(F)(F)C(F)(F)C(F)(F)C(F)(F)CCCCI                                     | -9.22  | 47.37 | 2.74 | P | IN  |
| QL02660 | 3-(Perfluorooctyl)propyl iodide                                                                                  | 200112-75-0 | FC(F)(F)C(F)(F)C(F)(F)C(F)(F)C(F)(F)C(F)(F)C(F)(F)C(F)(F)CCCI                                      | -9.35  | 51.43 | 2.68 | P | IN  |
| QL02661 | 11-Azido-1,1,1,2,2,3,3,4,4,5,5,6,6,7,7,8,8-heptadecafluoroundecane                                               | 852527-61-8 | FC(F)(F)C(F)(F)C(F)(F)C(F)(F)C(F)(F)C(F)(F)C(F)(F)C(F)(F)CCCN=[N+]=[N-]                            | -9.50  | 45.95 | 2.91 | P | IN  |
| QL02662 | N-(4,4,5,5,6,6,7,7,8,8,9,9,10,10,11,11,11-Heptadecafluoroundecyl)maleimide                                       | 852527-40-3 | FC(F)(F)C(F)(F)C(F)(F)C(F)(F)C(F)(F)C(F)(F)C(F)(F)C(F)(F)CCCN1C(=O)C=CC1=O                         | -9.05  | 39.53 | 2.88 | P | IN  |
| QL02663 | 1-(3-(Perfluorooctyl)propyl)-2H-3,1-benzoxazine-2,4(1H)-dione                                                    | 544418-04-4 | FC(F)(F)C(F)(F)C(F)(F)C(F)(F)C(F)(F)C(F)(F)C(F)(F)C(F)(F)CCCN1C(=O)OC(=O)C2=CC=CC=C12              | -9.11  | 34.00 | 3.06 | P | OUT |
| QL02664 | N-(4,4,5,5,6,6,7,7,8,8,9,9,10,10,11,11,11-Heptadecafluoroundecyl)iodoacetamide                                   | 852527-48-1 | FC(F)(F)C(F)(F)C(F)(F)C(F)(F)C(F)(F)C(F)(F)C(F)(F)C(F)(F)CCCN(C(=O)O)CI                            | -9.41  | 42.86 | 2.95 | P | IN  |
| QL02665 | 4,4,5,5,6,6,7,7,8,8,9,9,10,10,11,11,11-Heptadecafluoroundecyl prop-2-enoate                                      | 1652-60-4   | FC(F)(F)C(F)(F)C(F)(F)C(F)(F)C(F)(F)C(F)(F)C(F)(F)C(F)(F)CCCO(C(=O)O)C=C                           | -9.26  | 40.48 | 2.95 | P | IN  |
| QL02666 | 4-[3-(Perfluorooctyl)-1-propyloxy]benzaldehyde                                                                   | 494798-73-1 | FC(F)(F)C(F)(F)C(F)(F)C(F)(F)C(F)(F)C(F)(F)C(F)(F)C(F)(F)CCCOc1=CC=C(C(=O)O)C=C1                   | -9.57  | 35.42 | 3.23 | P | OUT |
| QL02667 | 1,1,1,2,2,3,3,4,4,5,5,6,6,7,7,8,8-Heptadecafluoro-10-isocyanatodecane                                            | 142010-50-2 | FC(F)(F)C(F)(F)C(F)(F)C(F)(F)C(F)(F)C(F)(F)C(F)(F)C(F)(F)CCN=C=O                                   | -9.39  | 50.00 | 2.74 | P | IN  |
| QL02668 | 3,3,4,4,5,5,6,6,7,7,8,8,9,9,10,10,10-Heptadecafluorodecyl pyridine-3-carboxylate                                 | 331716-84-8 | FC(F)(F)C(F)(F)C(F)(F)C(F)(F)C(F)(F)C(F)(F)C(F)(F)C(F)(F)CCOC(=O)c1ccncc1                          | -9.46  | 38.64 | 3.09 | P | IN  |
| QL02669 | n2 perfluoroalkyl acrylates, n=8                                                                                 |             | FC(F)(F)C(F)(F)C(F)(F)C(F)(F)C(F)(F)C(F)(F)C(F)(F)C(F)(F)CCOC(CC(C)=C)=O                           | -9.09  | 37.78 | 2.95 | P | IN  |
| QL02670 | multiple H-substituted, multiple ether-substituted perfluoroalkyl alcohols, n=4, m=5                             |             | FC(F)(F)C(F)(F)C(F)(F)C(F)(F)C(F)(F)C(F)(F)C(F)(F)C(F)(F)CCOCCOCCOCCOCCO[H]                        | -9.76  | 27.87 | 3.52 | P | OUT |
| QL02671 | multiple H-substituted, multiple ether-substituted perfluoroalkyl alcohols, n=4, m=6                             |             | FC(F)(F)C(F)(F)C(F)(F)C(F)(F)C(F)(F)C(F)(F)C(F)(F)C(F)(F)C(F)(F)CCOCCOCCOCCOCCOCCO[H]              | -9.99  | 25.00 | 3.71 | P | OUT |
| QL02672 | multiple H-substituted, multiple ether-substituted perfluoroalkyl alcohols, n=4, m=7                             |             | FC(F)(F)C(F)(F)C(F)(F)C(F)(F)C(F)(F)C(F)(F)C(F)(F)C(F)(F)C(F)(F)CCOCCOCCOCCOCCOCCOCCO[H]           | -10.11 | 22.67 | 3.83 | P | OUT |
| QL02673 | multiple H-substituted, multiple ether-substituted perfluoroalkyl alcohols, n=4, m=8                             |             | FC(F)(F)C(F)(F)C(F)(F)C(F)(F)C(F)(F)C(F)(F)C(F)(F)C(F)(F)C(F)(F)CCOCCOCCOCCOCCOCCOCCOCCO[H]        | -10.34 | 20.73 | 3.98 | P | OUT |
| QL02674 | multiple H-substituted, multiple ether-substituted perfluoroalkyl alcohols, n=4, m=9                             |             | FC(F)(F)C(F)(F)C(F)(F)C(F)(F)C(F)(F)C(F)(F)C(F)(F)C(F)(F)C(F)(F)CCOCCOCCOCCOCCOCCOCCOCCOCCO[H]     | -10.46 | 19.10 | 4.09 | P | OUT |
| QL02675 | multiple H-substituted, multiple ether-substituted perfluoroalkyl alcohols, n=4, m=10                            |             | FC(F)(F)C(F)(F)C(F)(F)C(F)(F)C(F)(F)C(F)(F)C(F)(F)C(F)(F)C(F)(F)CCOCCOCCOCCOCCOCCOCCOCCOCCOCCO[H]  | -10.67 | 17.71 | 4.22 | P | OUT |
| QL02676 | multiple H-substituted, multiple ether-substituted perfluoroalkyl alcohols, n=4, m=11                            |             | FC(F)(F)C(F)(F)C(F)(F)C(F)(F)C(F)(F)C(F)(F)C(F)(F)C(F)(F)C(F)(F)CCOCCOCCOCCOCCOCCOCCOCCOCCOCCO[H]  | -10.80 | 16.50 | 4.31 | P | OUT |



















|         |                                                                                        |              |                                                                                                                      |        |       |      |   |     |
|---------|----------------------------------------------------------------------------------------|--------------|----------------------------------------------------------------------------------------------------------------------|--------|-------|------|---|-----|
| QL02870 | 1H,1H-Tridecafluoro-1-iodoheptane                                                      | 212563-43-4  | FC(F)(F)C(F)(F)C(F)(F)C(F)(F)C(F)(F)Cl                                                                               | -8.75  | 60.87 | 2.15 | P | IN  |
| QL02871 | Perfluorohexylchloride                                                                 | 355-41-9     | FC(F)(F)C(F)(F)C(F)(F)C(F)(F)C(F)(F)Cl                                                                               | -8.75  | 70.00 | 1.90 | P | OUT |
| QL02872 | 1,1-Dihydroperfluoroheptyl acrylate                                                    | 559-11-5     | FC(F)(F)C(F)(F)C(F)(F)C(F)(F)C(F)(F)COC(=O)C=C                                                                       | -8.48  | 43.33 | 2.52 | P | IN  |
| QL02873 | multiple H-substituted-ether-substituted-perfluoroalkyl (linear) carboxylic acids, n=6 |              | FC(F)(F)C(F)(F)C(F)(F)C(F)(F)C(F)(F)COCC(O)=O                                                                        | -8.48  | 43.33 | 2.52 | P | IN  |
| QL02874 | Perfluorotrihexylamine                                                                 | 432-08-6     | FC(F)(F)C(F)(F)C(F)(F)C(F)(F)C(F)(F)N(C(F)(F)C(F)(F)C(F)(F)C(F)(F)C(F)(F)C(F)(F)C(F)(F)C(F)(F))C(F)(F)C(F)(F)C(F)(F) | -10.64 | 67.24 | 2.82 | P | OUT |
| QL02875 | 1-Chloro-4-(1,1,2,2,3,3,4,4,5,5,6,6-tridecafluorohexane-1-sulfonyl)benzene             | 76848-59-4   | FC(F)(F)C(F)(F)C(F)(F)C(F)(F)C(F)(F)S(=O)(=O)c1ccc(Cl)cc1                                                            | -8.82  | 42.42 | 2.69 | P | IN  |
| QL02876 | 1-(Perfluorohexyl)sulfonylamino pyridinium                                             | 254889-10-6  | FC(F)(F)C(F)(F)C(F)(F)C(F)(F)C(F)(F)C(F)(F)S(=O)(=O)N[N+]=CC=CC=C1                                                   | -8.49  | 37.14 | 2.69 | P | IN  |
| QL02877 | Hexane, 1-(ethenylsulfinyl)-1,1,2,2,3,3,4,4,5,5,6,6-tridecafluoro-                     | 680187-85-3  | FC(F)(F)C(F)(F)C(F)(F)C(F)(F)C(F)(F)C(F)(F)S(=O)C=C                                                                  | -8.27  | 50.00 | 2.24 | P | IN  |
| QL02878 | Hexane, 1-(pentafluorothio)-tridecafluoro-                                             | 1423-20-7    | FC(F)(F)C(F)(F)C(F)(F)C(F)(F)C(F)(F)S(F)(F)(F)F                                                                      | -9.38  | 72.00 | 2.12 | P | OUT |
| QL02879 | Perfluoroalkyl (linear) sulfinate, n=6                                                 |              | FC(F)(F)C(F)(F)C(F)(F)C(F)(F)C(F)(F)C(F)(F)S(O)=O                                                                    | -8.50  | 56.52 | 2.16 | P | IN  |
| QL02880 | [(Tridecafluoroethyl)sulfonyl]benzene                                                  | 69127-72-6   | FC(F)(F)C(F)(F)C(F)(F)C(F)(F)C(F)(F)SC1=CC=CC=C1                                                                     | -8.40  | 41.94 | 2.52 | P | IN  |
| QL02881 | Tridecafluorohexanesulphenyl chloride                                                  | 89987-98-4   | FC(F)(F)C(F)(F)C(F)(F)C(F)(F)C(F)(F)C(F)(F)SCl                                                                       | -9.11  | 66.67 | 2.15 | P | IN  |
| QL02882 | Bis(tridecafluorohexyl) disulphide                                                     | 93962-52-8   | FC(F)(F)C(F)(F)C(F)(F)C(F)(F)C(F)(F)SSC(F)(F)C(F)(F)C(F)(F)C(F)(F)C(F)(F)F                                           | -10.66 | 65.00 | 2.90 | P | OUT |
| QL02883 | Pentadecafluoro-2-iodoheptane                                                          | 24394-25-0   | FC(F)(F)C(F)(F)C(F)(F)C(F)(F)C(F)(F)C(F)(I)C(F)(F)F                                                                  | -9.29  | 69.57 | 2.15 | P | OUT |
| QL02884 | Undecafluorohexanenitrile                                                              | 23790-49-0   | FC(F)(F)C(F)(F)C(F)(F)C(F)(F)C#N                                                                                     | -8.19  | 61.11 | 1.89 | P | IN  |
| QL02885 | 3,3,4,4,5,5,6,6,7,7-Undecafluorohept-1-ene                                             | 84100-13-0   | FC(F)(F)C(F)(F)C(F)(F)C(F)(F)C=C                                                                                     | -7.65  | 52.38 | 1.89 | P | IN  |
| QL02886 | 2,2,3,3,4,4,5,5,6,6-Undecafluorohexanal                                                | 754-79-0     | FC(F)(F)C(F)(F)C(F)(F)C(F)(F)C(F)(F)C=O                                                                              | -7.99  | 57.89 | 1.89 | P | IN  |
| QL02887 | 5-(Undecafluoropentyl)-1H-imidazole                                                    | 113934-18-2  | FC(F)(F)C(F)(F)C(F)(F)C(F)(F)C1=CN=CN1                                                                               | -7.86  | 45.83 | 2.17 | P | IN  |
| QL02888 | 2,4,6-Tris(undecafluoropentyl)-1,3,5-triazine                                          | 23790-50-3   | FC(F)(F)C(F)(F)C(F)(F)C(F)(F)Cc1nc(nc(n1)C(F)(F)C(F)(F)C(F)(F)C(F)(F)C(F)(F)C(F)(F)C(F)(F)F)                         | -10.07 | 61.11 | 2.74 | P | OUT |
| QL02889 | 1 OH-substituted n2 fluorotelomer sulfonic acids, n=5                                  |              | FC(F)(F)C(F)(F)C(F)(F)C(F)(F)C(F)(F)CC(O)S(=O)(O)=O                                                                  | -7.60  | 39.29 | 2.24 | P | IN  |
| QL02890 | 1,1,1,2,2,3,3,4,4,5,5,8,8,9,9,10,10,11,11,12,12,12-Docosafluorododecane                | 1835255-38-3 | FC(F)(F)C(F)(F)C(F)(F)C(F)(F)C(F)(F)CCCC(F)(F)C(F)(F)C(F)(F)C(F)(F)C(F)(F)F                                          | -9.76  | 57.89 | 2.69 | P | IN  |
| QL02891 | 4,4,5,5,6,6,7,7,8,8-Undecafluorooctanal                                                | 195047-10-0  | FC(F)(F)C(F)(F)C(F)(F)C(F)(F)C(F)(F)CCC=O                                                                            | -7.92  | 44.00 | 2.25 | P | IN  |
| QL02892 | 1,1,1,2,2,3,3,4,4,5,5,12,12,13,13,14,14,15,15,16,16-Docosafluorohexadecane             | 1835255-25-8 | FC(F)(F)C(F)(F)C(F)(F)C(F)(F)C(F)(F)CCCCCCCC(F)(F)C(F)(F)C(F)(F)C(F)(F)F                                             | -9.59  | 44.00 | 3.00 | P | IN  |
| QL02893 | 1,1,1,2,2,3,3,4,4,5,5,16,16,17,17,18,18-Docosafluorooctadecane                         | 1835255-24-7 | FC(F)(F)C(F)(F)C(F)(F)C(F)(F)C(F)(F)CCCCCCCC(F)(F)C(F)(F)C(F)(F)C(F)(F)F                                             | -9.60  | 39.29 | 3.13 | P | IN  |
| QL02894 | 1,1,1,2,2,3,3,4,4,5,5,16,16,17,17,18,19,19,20,20,20-Docosafluoroicosane                | 1835252-07-7 | FC(F)(F)C(F)(F)C(F)(F)C(F)(F)C(F)(F)CCCCCCCC(F)(F)C(F)(F)C(F)(F)C(F)(F)F                                             | -9.64  | 35.48 | 3.26 | P | OUT |
| QL02895 | 1,1,1,2,2,3,3,4,4,5,5,19,19,20,20,21,21,22,22,23,23,23-Docosafluorotricosane           | 1980076-48-9 | FC(F)(F)C(F)(F)C(F)(F)C(F)(F)C(F)(F)CCCCCCCCCCCC(F)(F)C(F)(F)C(F)(F)C(F)(F)F                                         | -9.80  | 30.99 | 3.46 | P | OUT |
| QL02896 | n2 perfluoroalkyl acrylates, n=5                                                       |              | FC(F)(F)C(F)(F)C(F)(F)C(F)(F)C(F)(F)CCOC(CC(C)=C)=O                                                                  | -8.04  | 30.56 | 2.68 | P | OUT |
| QL02897 | 1-Iodo-1H,1H-perfluorohexane                                                           | 335-50-2     | FC(F)(F)C(F)(F)C(F)(F)C(F)(F)CI                                                                                      | -8.12  | 60.00 | 1.89 | P | IN  |

|         |                                                                                                                                  |              |                                                                                    |
|---------|----------------------------------------------------------------------------------------------------------------------------------|--------------|------------------------------------------------------------------------------------|
| QL02898 | 2,2,3,3,4,4,5,5,6,6,6-Undecafluorohexyl prop-2-enoate 6-(Ethenyloxy)-                                                            | 376-56-7     | FC(F)(F)C(F)(F)C(F)(F)C(F)(F)COC(=O)C=C                                            |
| QL02899 | 1,1,1,2,2,3,3,4,4,5,5-undecafluorohexane                                                                                         | 595-00-6     | FC(F)(F)C(F)(F)C(F)(F)C(F)(F)COC=C                                                 |
| QL02900 | 1,1,1,2,2,3,3,4,4,5,5-Undecafluoro-6-[[prop-2-en-1-yl]oxy]hexane 2-[[{2,2,3,3,4,4,5,5,6,6,6-Undecafluorohexyl]oxy)methyl]oxirane | 1516879-68-7 | FC(F)(F)C(F)(F)C(F)(F)C(F)(F)COC=C                                                 |
| QL02901 | 2,2,3,3,4,4,5,5,6,6,6-Undecafluorohexyl                                                                                          | 140369-64-8  | FC(F)(F)C(F)(F)C(F)(F)C(F)(F)COC1CO1                                               |
| QL02902 | nonafluorobutane-1-sulfonate 2,2,3,3,4,4,5,5,6,6,6-Undecafluorohexyl                                                             | 924894-08-6  | FC(F)(F)C(F)(F)C(F)(F)C(F)(F)COS(=O)(=O)C(F)(F)C(F)(F)C(F)(F)F                     |
| QL02903 | trifluoromethanesulfonate n1 fluorotelomer sulfonic acids, n=5                                                                   | 168632-11-9  | FC(F)(F)C(F)(F)C(F)(F)C(F)(F)COS(=O)(=O)C(F)(F)F                                   |
| QL02904 | Perflenapent                                                                                                                     | 678-26-2     | FC(F)(F)C(F)(F)C(F)(F)C(F)(F)CS(=O)(O)=O                                           |
| QL02905 | 2,2,3,3,4,4,5,5-Octafluoro-1-(undecafluoropentyl)pyrrolidine ether-substituted perfluoroalkyl (linear) caborxylic acids_i, n=5   | 94718-24-8   | FC(F)(F)C(F)(F)C(F)(F)C(F)(F)N1C(F)(F)C(F)(F)C1(F)F                                |
| QL02907 |                                                                                                                                  |              | FC(F)(F)C(F)(F)C(F)(F)C(F)(F)OC(F)(C(F)(F)F)C(O)=O                                 |
| QL02908 | 1,1,1,2,2,3,3,4,4,5,5-Undecafluoro-5-[1,1,2,3,3,3-hexafluoro-2-(trifluoromethyl)propoxy]pentane                                  | 169477-62-7  | FC(F)(F)C(F)(F)C(F)(F)C(F)(F)OC(F)(C(F)(C(F)(F)F)C(F)(F)F                          |
| QL02909 | 1,1,2,2,3,3,4,4,5,5,5-undecafluoro-N-(2-hydroxyethyl)pentane-1-sulfonamide                                                       |              | FC(F)(F)C(F)(F)C(F)(F)C(F)(F)S(=O)(NCCO)=O                                         |
| QL02910 | Perfluoroalkyl (linear) sulfinate, n=5                                                                                           |              | FC(F)(F)C(F)(F)C(F)(F)C(F)(F)S(O)=O                                                |
| QL02911 | 1,1,1,2,2,3,3,4,4,5,5,6,6-Tridecafluoro-5-iodohexane                                                                             | 355-44-2     | FC(F)(F)C(F)(F)C(F)(F)C(F)(F)I(C(F)(F)F                                            |
| QL02912 | 2,2,3,3,4,4,5,5,5-Nonafluoropentane-1,1-diol (3,3,4,4,5,5,6,6,6-Nonafluorohex-1-yn-1-yl)benzene                                  | 355-30-6     | FC(F)(F)C(F)(F)C(F)(F)C(F)(F)O                                                     |
| QL02913 | 2,2,3,3,4,4,5,5,5-nonafluoropentanenitrile                                                                                       | 66249-23-8   | FC(F)(F)C(F)(F)C(F)(F)C(F)(F)C#Cc1ccccc1                                           |
| QL02914 | 1H,1H,2H-Perfluoro-1-hexene                                                                                                      | 22325-71-9   | FC(F)(F)C(F)(F)C(F)(F)C(F)(F)C#N                                                   |
| QL02915 | (3,3,4,4,5,5,6,6,6-Nonafluoro-1-iodohex-1-en-1-yl)benzene                                                                        | 19430-93-4   | FC(F)(F)C(F)(F)C(F)(F)C(F)(F)C=C                                                   |
| QL02916 |                                                                                                                                  | 109574-90-5  | FC(F)(F)C(F)(F)C(F)(F)C(F)(F)C=C(I)C1=CC=CC=C1                                     |
| QL02917 | [(1Z)-3,3,4,4,5,5,6,6,6-Nonafluorohex-1-en-1-yl]benzene                                                                          | 95452-53-2   | FC(F)(F)C(F)(F)C(F)(F)C(F)(F)C=C/c1ccccc1                                          |
| QL02918 | 4,4,5,5,6,6,7,7,7-Nonafluorohepta-1,2-diene (5E)-                                                                                | 132673-98-4  | FC(F)(F)C(F)(F)C(F)(F)C(F)(F)C=C=C                                                 |
| QL02919 | 1,1,1,2,2,3,3,4,4,7,7,8,8,9,9,10,10,11,11,12,12,13,13,14,14,14-Hexacosafuorotetradec-5-ene (5E)-                                 | 51249-69-5   | FC(F)(F)C(F)(F)C(F)(F)C(F)(F)C=CC(F)(F)C(F)(F)C(F)(F)C(F)(F)C(F)(F)C(F)(F)C(F)(F)F |
| QL02920 | 1,1,1,2,2,3,3,4,4,7,7,8,8,9,9,10,10,11,11,12,12,12-Docosafuorododec-5-ene                                                        | 51249-66-2   | FC(F)(F)C(F)(F)C(F)(F)C(F)(F)C=CC(F)(F)C(F)(F)C(F)(F)C(F)(F)C(F)(F)F               |

|        |       |      |   |     |
|--------|-------|------|---|-----|
| -8.23  | 40.74 | 2.48 | P | IN  |
| -7.92  | 44.00 | 2.25 | P | IN  |
| -8.16  | 39.29 | 2.49 | P | IN  |
| -8.06  | 37.93 | 2.48 | P | IN  |
| -9.62  | 55.56 | 2.69 | P | IN  |
| -8.84  | 51.85 | 2.44 | P | IN  |
| -7.83  | 45.83 | 2.15 | P | IN  |
| -8.55  | 70.59 | 1.79 | P | OUT |
| -9.13  | 65.52 | 2.19 | P | IN  |
| -8.53  | 55.56 | 2.20 | P | IN  |
| -9.64  | 66.67 | 2.39 | P | IN  |
| -8.01  | 37.93 | 2.46 | P | IN  |
| -7.83  | 55.00 | 1.90 | P | IN  |
| -8.75  | 70.00 | 1.90 | P | OUT |
| -7.15  | 47.37 | 1.81 | P | IN  |
| -7.75  | 34.62 | 2.43 | P | IN  |
| -7.93  | 60.00 | 1.81 | P | IN  |
| -7.31  | 50.00 | 1.81 | P | IN  |
| -7.80  | 35.71 | 2.42 | P | IN  |
| -7.59  | 32.14 | 2.43 | P | IN  |
| -7.37  | 47.37 | 1.91 | P | IN  |
| -10.55 | 61.90 | 2.93 | P | OUT |
| -10.06 | 61.11 | 2.73 | P | OUT |

|         |                                                                                               |              |                                                                                              |
|---------|-----------------------------------------------------------------------------------------------|--------------|----------------------------------------------------------------------------------------------|
| QL02921 | 1,1,1,2,2,3,3,4,4,7,7,8,8,9,9,10,10,11,11,11-icosafuoroundec-5-ene                            | 100508-28-9  | FC(F)(F)C(F)(F)C(F)(F)C(F)(F)C=CC(F)(F)C(F)(F)C(F)(F)C(F)(F)F                                |
| QL02922 | 1,1,1,2,2,3,3,4,4,7,7,8,8,9,9,10,10,10-Octadecafluorodec-5-ene                                | 84551-43-9   | FC(F)(F)C(F)(F)C(F)(F)C(F)(F)C=CC(F)(F)C(F)(F)C(F)(F)C(F)(F)F                                |
| QL02923 | Perfluorovaleraldehyde                                                                        | 375-53-1     | FC(F)(F)C(F)(F)C(F)(F)C(F)(F)C=O                                                             |
| QL02924 | Perfluorobutytycyclohexane                                                                    | 374-60-7     | FC(F)(F)C(F)(F)C(F)(F)C1(F)C(F)(F)C(F)(F)C(F)(F)C(F)(F)C1(F)F                                |
| QL02925 | Perfluorodecahydro-1-(perfluorobutyl)naphthalene                                              | 118914-93-5  | FC(F)(F)C(F)(F)C(F)(F)C(F)(F)C1(F)C(F)(F)C(F)(F)C(F)(F)C2(F)C(F)(F)C(F)(F)C(F)(F)C(F)(F)C12F |
| QL02926 | Perfluorodecahydro-2-n-butyl-naphthalene                                                      | 119107-96-9  | FC(F)(F)C(F)(F)C(F)(F)C(F)(F)C1(F)C(F)(F)C(F)(F)C2(F)C(F)(F)C(F)(F)C(F)(F)C2(F)C1(F)F        |
| QL02927 | Furan, 2,2,3,3,4,5,5-heptafluorotetrahydro-4-(nonafluorobutyl)-                               | 646-85-5     | FC(F)(F)C(F)(F)C(F)(F)C(F)(F)C1(F)C(F)(F)OC(F)(F)C1(F)F                                      |
| QL02928 | 3,4,4-Trifluoro-3-(nonafluorobutyl)-1,2lambda~6~-oxathietane-2,2-dione                        | 85211-95-6   | FC(F)(F)C(F)(F)C(F)(F)C(F)(F)C1(F)C(F)(F)OS1(=O)=O                                           |
| QL02929 | 2,2,3-Trifluoro-3-(nonafluorobutyl)oxirane                                                    | 72804-48-9   | FC(F)(F)C(F)(F)C(F)(F)C(F)(F)C1(F)OC1(F)F                                                    |
| QL02930 | 2-(Nonafluorobutyl)-4H-1-benzopyran-4-one                                                     | 304877-96-1  | FC(F)(F)C(F)(F)C(F)(F)C(F)(F)C1=CC(=O)c2ccccc2O1                                             |
| QL02931 | 6-(Nonafluorobutyl)-2-phenylpyrimidin-4(3H)-one                                               | 180748-44-1  | FC(F)(F)C(F)(F)C(F)(F)C(F)(F)C1=CC(=O)NC(=N1)c1ccccc1                                        |
| QL02932 | 6-(Nonafluorobutyl)-2-sulfanylidene-2,3-dihydropyrimidin-4(1H)-one                            | 1426894-99-6 | FC(F)(F)C(F)(F)C(F)(F)C(F)(F)C1=CC(=O)NC(=S)N1                                               |
| QL02933 | 9-(Nonafluorobutyl)-2,3,6,7-tetrahydro-1H,5H,11H-pyrano[2,3-f]pyrido[3,2,1-ij]quinolin-11-one | 355822-08-1  | FC(F)(F)C(F)(F)C(F)(F)C(F)(F)C1=CC(=O)Oc2c3CCCN4CCc(cc12)c34                                 |
| QL02934 | Benzene, (nonafluorobutyl)-                                                                   | 2398-75-6    | FC(F)(F)C(F)(F)C(F)(F)C(F)(F)C1=CC=CC=C1                                                     |
| QL02935 | 2-(Nonafluorobutyl)-1H-indene                                                                 | 1608112-37-3 | FC(F)(F)C(F)(F)C(F)(F)C(F)(F)C1=Cc2ccccc2C1                                                  |
| QL02936 | SCHEMBL1270621                                                                                | 58671-28-6   | FC(F)(F)C(F)(F)C(F)(F)C(F)(F)C1=CNC(=O)NC1=O                                                 |
| QL02937 | 4-(Nonafluorobutyl)-1,3-dihydro-2H-1,5-benzodiazepin-2-one                                    | 96146-12-2   | FC(F)(F)C(F)(F)C(F)(F)C(F)(F)C1=Nc2ccccc2NC(=O)C1                                            |
| QL02938 | 2-(Nonafluorobutyl)-1-benzofuran                                                              | 1608112-36-2 | FC(F)(F)C(F)(F)C(F)(F)C(F)(F)C1cc2ccccc2o1                                                   |
| QL02939 | 2-(Nonafluorobutyl)-1-benzothiophene                                                          | 1608112-38-4 | FC(F)(F)C(F)(F)C(F)(F)C(F)(F)C1cc2ccccc2s1                                                   |
| QL02940 | 4-(Nonafluorobutyl)benzene-1,2-dicarbonitrile                                                 | 1207299-71-5 | FC(F)(F)C(F)(F)C(F)(F)C(F)(F)C1ccc(C#N)c(c1)C#N                                              |
| QL02941 | 1-Ethenyl-4-(nonafluorobutyl)benzene                                                          | 159241-92-6  | FC(F)(F)C(F)(F)C(F)(F)C(F)(F)C1ccc(C=C)cc1                                                   |
| QL02942 | 4-(Nonafluorobutyl)benzonitrile                                                               | 137052-16-5  | FC(F)(F)C(F)(F)C(F)(F)C(F)(F)C1ccc(cc1)C#N                                                   |
| QL02943 | 7-(Nonafluorobutyl)-1-benzothiophene                                                          | 1608112-40-8 | FC(F)(F)C(F)(F)C(F)(F)C(F)(F)C1cccc2ccsc12                                                   |
| QL02944 | Tetrahydro(perfluorobutyl)furan                                                               | 26446-59-3   | FC(F)(F)C(F)(F)C(F)(F)C(F)(F)C1CCCCO1                                                        |
| QL02945 | 2-(Nonafluorobutyl)thiophene                                                                  | 96721-81-2   | FC(F)(F)C(F)(F)C(F)(F)C(F)(F)C1cccs1                                                         |
| QL02946 | 3-(Nonafluorobutyl)-1H-indole                                                                 | 1608112-33-9 | FC(F)(F)C(F)(F)C(F)(F)C(F)(F)C1cNc2ccccc12                                                   |
| QL02947 | Nonafluorobutylepoxide                                                                        | 89807-87-4   | FC(F)(F)C(F)(F)C(F)(F)C(F)(F)C1CO1                                                           |
| QL02948 | 4-(Nonafluorobutyl)-1,3-dioxolan-2-one                                                        | 1469980-27-5 | FC(F)(F)C(F)(F)C(F)(F)C(F)(F)C1COC(=O)O1                                                     |
| QL02949 | 3-(Nonafluorobutyl)-1-benzothiophene                                                          | 1608112-39-5 | FC(F)(F)C(F)(F)C(F)(F)C(F)(F)C1csc2ccccc12                                                   |
| QL02950 | 2-(Nonafluorobutyl)-1H-indole                                                                 | 1608112-34-0 | FC(F)(F)C(F)(F)C(F)(F)C(F)(F)C1Nc2ccccc2c1                                                   |
| QL02951 | 3-(Nonafluorobutyl)-5-phenyl-1H-pyrazole                                                      | 204130-95-0  | FC(F)(F)C(F)(F)C(F)(F)C(F)(F)C1nNc(c1):c1ccccc1                                              |
| QL02952 | 11-(Nonafluorobutyl)-9,10-dihydro-9,10-(epithiomethano)anthracene                             | 267648-90-8  | FC(F)(F)C(F)(F)C(F)(F)C(F)(F)C1SC2c3ccccc3C1c1ccccc21                                        |

|       |       |      |   |     |
|-------|-------|------|---|-----|
| -9.80 | 60.61 | 2.63 | P | IN  |
| -9.36 | 60.00 | 2.45 | P | IN  |
| -7.70 | 56.25 | 1.81 | P | IN  |
| -9.18 | 66.67 | 2.19 | P | IN  |
| -9.42 | 65.00 | 2.34 | P | IN  |
| -9.81 | 65.00 | 2.51 | P | IN  |
| -8.83 | 64.00 | 2.10 | P | IN  |
| -7.73 | 54.55 | 1.87 | P | IN  |
| -8.33 | 63.16 | 1.90 | P | IN  |
| -7.55 | 31.03 | 2.44 | P | IN  |
| -7.49 | 27.27 | 2.52 | P | OUT |
| -7.34 | 37.50 | 2.17 | P | IN  |
| -7.01 | 20.00 | 2.51 | P | OUT |
| -7.38 | 37.50 | 2.18 | P | IN  |
| -7.14 | 31.03 | 2.26 | P | IN  |
| -7.51 | 37.50 | 2.24 | P | IN  |
| -7.32 | 28.13 | 2.42 | P | OUT |
| -7.29 | 33.33 | 2.26 | P | IN  |
| -7.29 | 33.33 | 2.26 | P | IN  |
| -7.80 | 34.62 | 2.45 | P | IN  |
| -7.68 | 32.14 | 2.47 | P | IN  |
| -7.92 | 36.00 | 2.47 | P | IN  |
| -7.06 | 33.33 | 2.16 | P | IN  |
| -6.67 | 36.00 | 1.91 | P | IN  |
| -7.10 | 42.86 | 1.91 | P | IN  |
| -7.18 | 32.14 | 2.24 | P | IN  |
| -7.15 | 47.37 | 1.81 | P | IN  |
| -7.59 | 40.91 | 2.18 | P | IN  |
| -7.26 | 33.33 | 2.24 | P | IN  |
| -7.21 | 32.14 | 2.26 | P | IN  |
| -7.68 | 29.03 | 2.55 | P | OUT |
| -6.94 | 22.50 | 2.40 | P | OUT |

[illegible]



|         |                                                                                         |              |                                                                                           |        |       |      |   |     |
|---------|-----------------------------------------------------------------------------------------|--------------|-------------------------------------------------------------------------------------------|--------|-------|------|---|-----|
| QL02977 | 1H,1H,2H,2H-Perfluorohexyl bromide                                                      | 38436-14-5   | FC(F)(F)C(F)(F)C(F)(F)C(F)(F)CCBr                                                         | -7.53  | 50.00 | 1.91 | P | IN  |
| QL02978 | 1-[[[4,4,5,5,6,6,7,7,7-Nonafluoroheptanoyl]oxy]pyrrolidine-2,5-dione                    | 852527-43-6  | FC(F)(F)C(F)(F)C(F)(F)C(F)(F)CCC(=O)ON1C(=O)CCC1=O                                        | -7.34  | 27.27 | 2.45 | P | OUT |
| QL02979 | 1,1,1,2,2,3,3,4,4,5,5,6,6,7,7,8,8,11,11,12,12,13,13,14,14,14-Hexacosaufluorotetradecane | 53638-09-8   | FC(F)(F)C(F)(F)C(F)(F)C(F)(F)CCCC(F)(F)C(F)(F)C(F)(F)C(F)(F)C(F)(F)C(F)(F)C(F)(F)C(F)(F)F | -10.38 | 59.09 | 2.93 | P | OUT |
| QL02980 | Decane, 1,1,1,2,2,3,3,4,4,7,7,8,8,9,9,10,10,10-octadecafluoro-                          | 142083-52-1  | FC(F)(F)C(F)(F)C(F)(F)C(F)(F)CCCC(F)(F)C(F)(F)C(F)(F)C(F)(F)F                             | -9.13  | 56.25 | 2.45 | P | IN  |
| QL02981 | 1,1,1,2,2,3,3,4,4-Nonafluoro-7,7-diisocyanatoheptane                                    | 306976-22-7  | FC(F)(F)C(F)(F)C(F)(F)C(F)(F)CCC(N=C=O)N=C=O                                              | -7.65  | 33.33 | 2.42 | P | IN  |
| QL02982 | 4,4,5,5,6,6,7,7-Nonafluoroheptanenitrile                                                | 26649-23-0   | FC(F)(F)C(F)(F)C(F)(F)C(F)(F)CC#N                                                         | -7.76  | 42.86 | 2.21 | P | IN  |
| QL02983 | 1-[[[[4-(2-(Perfluorobutyl)-1-ethyl)phenyl]methoxy]carbonyl]oxy]-2,5-pyrrolidinedione   | 825635-46-9  | FC(F)(F)C(F)(F)C(F)(F)C(F)(F)CCC1=CC=C(COC(=O)ON2C(=O)CCC2=O)C=C1                         | -8.10  | 19.15 | 3.02 | P | OUT |
| QL02984 | 8-Bromo-1,1,1,2,2,3,3,4,4-nonafluorooctane                                              | 38436-18-9   | FC(F)(F)C(F)(F)C(F)(F)C(F)(F)CCCCBr                                                       | -7.65  | 38.46 | 2.28 | P | IN  |
| QL02985 | 10-Bromo-1,1,1,2,2,3,3,4,4-nonafluorodecane                                             | 457603-91-7  | FC(F)(F)C(F)(F)C(F)(F)C(F)(F)CCCCCBr                                                      | -7.74  | 31.25 | 2.52 | P | IN  |
| QL02986 | 1,1,1,2,2,3,3,4,4,11,11,12,12,13,13,14,14,14-Octadecafluorotetradecane                  | 1835252-03-3 | FC(F)(F)C(F)(F)C(F)(F)C(F)(F)CCCCCCC(F)(F)C(F)(F)C(F)(F)C(F)(F)F                          | -8.98  | 40.91 | 2.81 | P | IN  |
| QL02987 | 1,1,1,2,2,3,3,4,4,13,13,14,14,15,15,16,16,16-Octadecafluorohexadecane                   | 1835252-00-0 | FC(F)(F)C(F)(F)C(F)(F)C(F)(F)CCCCCCCC(F)(F)C(F)(F)C(F)(F)C(F)(F)F                         | -9.03  | 36.00 | 2.97 | P | IN  |
| QL02988 | 12,12,13,13,14,14,15,15,15-Nonafluoropentadecanoyl chloride                             | 118624-68-3  | FC(F)(F)C(F)(F)C(F)(F)C(F)(F)CCCCCCCCC(Cl)=O                                              | -8.27  | 21.74 | 3.02 | P | OUT |
| QL02989 | 1,1,1,2,2,3,3,4,4,15,15,16,16,17,17,18,18,18-Octadecafluorooctadecane                   | 1835251-99-4 | FC(F)(F)C(F)(F)C(F)(F)C(F)(F)CCCCCCCCC(F)(F)C(F)(F)C(F)(F)C(F)(F)F                        | -9.11  | 32.14 | 3.11 | P | OUT |
| QL02990 | 15-Bromo-1,1,1,2,2,3,3,4,4-nonafluoropentadecane                                        | 213207-95-5  | FC(F)(F)C(F)(F)C(F)(F)C(F)(F)CCCCCCCCCBr                                                  | -8.29  | 21.28 | 3.04 | P | OUT |
| QL02991 | 1,1,1,2,2,3,3,4,4-Nonafluoro-8-iodooctane                                               | 99324-98-8   | FC(F)(F)C(F)(F)C(F)(F)C(F)(F)CCCCI                                                        | -7.65  | 38.46 | 2.28 | P | IN  |
| QL02992 | 4,4,5,5,6,6,7,7-Nonafluoroheptyl iodide                                                 | 183547-74-2  | FC(F)(F)C(F)(F)C(F)(F)C(F)(F)CCCI                                                         | -7.80  | 43.48 | 2.21 | P | IN  |
| QL02993 | 4,4,5,5,6,6,7,7-Nonafluoroheptyl prop-2-enoate                                          | 443145-46-8  | FC(F)(F)C(F)(F)C(F)(F)C(F)(F)CCOC(=O)C=C                                                  | -7.63  | 30.00 | 2.51 | P | OUT |
| QL02994 | 4,4,5,5,6,6,7,7-Nonafluoroheptyl carbonochloridate                                      | 821806-42-2  | FC(F)(F)C(F)(F)C(F)(F)C(F)(F)CCOC(Cl)=O                                                   | -8.01  | 38.46 | 2.44 | P | IN  |
| QL02995 | (3,3,4,4,5,5,6,6-Nonafluorohexyl)carbonimidoyl                                          | 142030-27-1  | FC(F)(F)C(F)(F)C(F)(F)C(F)(F)CCN=C(Cl)Cl                                                  | -8.21  | 47.83 | 2.27 | P | IN  |
| QL02996 | Bis(3,3,4,4,5,5,6,6-Nonafluorohexyl) butanedioate                                       | 508194-70-5  | FC(F)(F)C(F)(F)C(F)(F)C(F)(F)CCOC(=O)CCC(=O)OCCC(F)(F)C(F)(F)C(F)(F)C(F)(F)F              | -9.41  | 36.00 | 3.14 | P | OUT |
| QL02997 | bis((Perfluorobutyl)ethyl) carbonate                                                    | 1132677-78-1 | FC(F)(F)C(F)(F)C(F)(F)C(F)(F)CCOC(=O)OCCC(F)(F)C(F)(F)C(F)(F)C(F)(F)F                     | -9.40  | 42.86 | 2.95 | P | IN  |
| QL02998 | 3,3,4,4,5,5,6,6-Nonafluorohexyl carbonochloridate                                       | 40678-17-9   | FC(F)(F)C(F)(F)C(F)(F)C(F)(F)CCOC(Cl)=O                                                   | -7.94  | 43.48 | 2.27 | P | IN  |
| QL02999 | 6-(Ethenyloxy)-1,1,1,2,2,3,3,4,4-nonafluorohexane                                       | 63391-84-4   | FC(F)(F)C(F)(F)C(F)(F)C(F)(F)CCOC=C                                                       | -7.50  | 36.00 | 2.28 | P | IN  |
| QL03000 | 3,3,4,4,5,5,6,6-Nonafluorohexyl formate                                                 | 78689-20-0   | FC(F)(F)C(F)(F)C(F)(F)C(F)(F)CCOC=O                                                       | -7.70  | 39.13 | 2.28 | P | IN  |
| QL03001 | 1,1,1,2,2,3,3,4,4-Nonafluoro-6-((prop-2-en-1-yl)oxy)hexane                              | 188298-09-1  | FC(F)(F)C(F)(F)C(F)(F)C(F)(F)CCOCC=C                                                      | -7.66  | 32.14 | 2.46 | P | IN  |



|         |                                                                                                          |              |                                                                                                                       |       |       |      |   |     |
|---------|----------------------------------------------------------------------------------------------------------|--------------|-----------------------------------------------------------------------------------------------------------------------|-------|-------|------|---|-----|
| QL03031 | N-[(4-Bromophenyl)(perfluorobutyl)oxido-λ4-sulfanylidene]-1,1,1-trifluoromethanesulfonamide              | 1421133-01-8 | FC(F)(F)C(F)(F)C(F)(F)C(F)(F)S(=O)(=NS(=O)=O)C(F)(F)C(F)C1=CC=C(Br)C=C1                                               | -7.91 | 38.24 | 2.40 | P | IN  |
| QL03032 | bis(Perfluorobutylsulfonyl)methylenephenyliodine                                                         | 681477-42-9  | FC(F)(F)C(F)(F)C(F)(F)C(F)(F)S(=O)(=O)C(=I)C1=CC=CC=C1S(=O)(=O)C(F)(F)C(F)(F)C(F)(F)C(F)(F)F                          | -8.67 | 42.22 | 2.63 | P | IN  |
| QL03033 | 1-[Bis(1,1,2,2,3,3,4,4,4-nonafluorobutane-1-sulfonyl)methanesulfonyl]-1,1,2,2,3,3,4,4,4-nonafluorobutane | 182505-69-7  | FC(F)(F)C(F)(F)C(F)(F)C(F)(F)S(=O)(=O)C(S(=O)(=O)C(F)(F)C(F)(F)C(F)(F)C(F)(F)S(=O)(=O)C(F)(F)C(F)(F)C(F)(F)F)C(F)(F)F | -9.34 | 54.00 | 2.61 | P | IN  |
| QL03034 | Nonafluorobutane-1-sulfonyl]ethynyl]benzene                                                              | 63369-94-8   | FC(F)(F)C(F)(F)C(F)(F)C(F)(F)S(=O)(=O)C#CC1=CC=CC=C1                                                                  | -7.76 | 31.03 | 2.53 | P | IN  |
| QL03035 | 2-(1,1,2,2,3,3,4,4,4-Nonafluorobutane-1-sulfonyl)-1-phenylethan-1-one                                    | 58510-75-1   | FC(F)(F)C(F)(F)C(F)(F)C(F)(F)S(=O)(=O)CC(=O)C1=CC=CC=C1                                                               | -7.57 | 28.13 | 2.53 | P | OUT |
| QL03036 | [(1,1,2,2,3,3,4,4,4-Nonafluorobutane-1-sulfonyl)methyl]benzene                                           | 879081-10-4  | FC(F)(F)C(F)(F)C(F)(F)C(F)(F)S(=O)(=O)Cc1ccccc1                                                                       | -7.55 | 30.00 | 2.47 | P | OUT |
| QL03037 | 1,1,1,2,2,3,3,4,4-Nonafluoro-4-[(1,1,2,2,3,3,4,4,4-nonafluorobutane-1-sulfonyl)methanesulfonyl]butane    | 29214-37-7   | FC(F)(F)C(F)(F)C(F)(F)C(F)(F)S(=O)(=O)CS(=O)(=O)C(F)(F)C(F)(F)C(F)(F)C(F)(F)F                                         | -9.24 | 51.43 | 2.63 | P | IN  |
| QL03038 | N-[(4-Bromophenyl)oxido(trifluoromethyl)sulfanylidene]perfluorobutanesulfonamide                         | 1421133-00-7 | FC(F)(F)C(F)(F)C(F)(F)C(F)(F)S(=O)(=O)N=S(=O)(C1=CC=C(Br)C=C1)C(F)(F)F                                                | -8.36 | 38.24 | 2.60 | P | IN  |
| QL03039 | 1-(1,1,2,2,3,3,4,4,4-Nonafluorobutane-1-sulfonyl)-1H-benzotriazole                                       | 681443-29-8  | FC(F)(F)C(F)(F)C(F)(F)C(F)(F)S(=O)(=O)n1nnc2ccccc12                                                                   | -7.58 | 31.03 | 2.45 | P | IN  |
| QL03040 | N-(1,1,2,2,3,3,4,4,4-Nonafluorobutane-1-sulfonyl)cyclopent-2-ene-1-carboxamide                           | 1440968-24-0 | FC(F)(F)C(F)(F)C(F)(F)C(F)(F)S(=O)(=O)NC(=O)C1CCC=C1                                                                  | -7.43 | 28.13 | 2.47 | P | OUT |
| QL03041 | N-(1,1,2,2,3,3,4,4,4-Nonafluorobutane-1-sulfonyl)cyclopentanecarboxamide                                 | 1440968-21-7 | FC(F)(F)C(F)(F)C(F)(F)C(F)(F)S(=O)(=O)NC(=O)C1CCCC1                                                                   | -7.33 | 26.47 | 2.47 | P | OUT |
| QL03042 | N-(1,1,2,2,3,3,4,4,4-Nonafluorobutane-1-sulfonyl)cyclohexanecarboxamide                                  | 1440968-37-5 | FC(F)(F)C(F)(F)C(F)(F)C(F)(F)S(=O)(=O)NC(=O)C1CCCCC1                                                                  | -7.34 | 24.32 | 2.53 | P | OUT |
| QL03043 | N,N'-(3,4-Dioxocyclobut-1-ene-1,2-diyl)bis(1,1,2,2,3,3,4,4,4-nonafluorobutane-1-sulfonamide)             | 1234571-87-9 | FC(F)(F)C(F)(F)C(F)(F)C(F)(F)S(=O)(=O)NC1=C(NS(=O)(=O)C(F)(F)C(F)(F)C(F)(F)C(F)(F)C(=O)C1=O                           | -9.37 | 42.86 | 2.93 | P | IN  |
| QL03044 | N-Cyclooctyl-1,1,2,2,3,3,4,4,4-nonafluorobutane-1-sulfonamide                                            | 1456900-48-3 | FC(F)(F)C(F)(F)C(F)(F)C(F)(F)S(=O)(=O)NC1CCCCCCC1                                                                     | -7.19 | 21.95 | 2.53 | P | OUT |
| QL03045 | 1,1,2,2,3,3,4,4,4-nonafluoro-N-[(trifluoromethyl)sulfonyl]-1-Butanesulfonamide                           | 39847-37-5   | FC(F)(F)C(F)(F)C(F)(F)C(F)(F)S(=O)(=O)NS(=O)(=O)C(F)(F)F                                                              | -8.13 | 48.00 | 2.23 | P | IN  |
| QL03046 | Vinyl nonafluoro-1-butanefulfonate                                                                       | 42409-05-2   | FC(F)(F)C(F)(F)C(F)(F)C(F)(F)S(=O)(=O)OC=C                                                                            | -7.56 | 40.91 | 2.17 | P | IN  |
| QL03047 | Phenyl nonafluorobutane-1-sulfonate                                                                      | 25628-11-9   | FC(F)(F)C(F)(F)C(F)(F)C(F)(F)S(=O)(=O)OC1=CC=CC=C1                                                                    | -7.69 | 32.14 | 2.47 | P | IN  |
| QL03048 | Cyclopent-1-en-1-yl nonafluorobutane-1-sulfonate                                                         | 36839-94-8   | FC(F)(F)C(F)(F)C(F)(F)C(F)(F)S(=O)(=O)OC1=CCCC1                                                                       | -7.11 | 31.03 | 2.24 | P | IN  |
| QL03049 | Cyclohex-1-en-1-yl nonafluorobutane-1-sulfonate                                                          | 36839-95-9   | FC(F)(F)C(F)(F)C(F)(F)C(F)(F)S(=O)(=O)OC1=CCCCC1                                                                      | -7.44 | 28.13 | 2.47 | P | OUT |

|         |                                                                                                                  |              |                                                                                    |       |       |      |   |     |
|---------|------------------------------------------------------------------------------------------------------------------|--------------|------------------------------------------------------------------------------------|-------|-------|------|---|-----|
| QL03050 | Cyclohept-1-en-1-yl<br>nonafluorobutane-1-sulfonate                                                              | 42108-79-2   | FC(F)(F)C(F)(F)C(F)(F)C(F)(F)S(=O)(=O)OC1=CCCCC1                                   | -7.28 | 25.71 | 2.47 | P | OUT |
| QL03051 | 4-Cyanophenyl nonafluorobutane-1-sulfonate                                                                       | 626201-15-8  | FC(F)(F)C(F)(F)C(F)(F)C(F)(F)S(=O)(=O)Oc1ccc(cc1)C#N                               | -8.07 | 31.03 | 2.68 | P | OUT |
| QL03052 | 2,4-Dichlorophenyl<br>nonafluorobutane-1-sulfonate                                                               | 32848-21-8   | FC(F)(F)C(F)(F)C(F)(F)C(F)(F)S(=O)(=O)Oc1ccc(Cl)cc1Cl                              | -8.23 | 39.29 | 2.52 | P | IN  |
| QL03053 | Quinolin-8-yl nonafluorobutane-1-sulfonate                                                                       | 41605-60-1   | FC(F)(F)C(F)(F)C(F)(F)C(F)(F)S(=O)(=O)Oc1cccc2ccnc12                               | -7.47 | 27.27 | 2.51 | P | OUT |
| QL03054 | 2-Cyanophenyl nonafluorobutane-1-sulfonate                                                                       | 873838-37-0  | FC(F)(F)C(F)(F)C(F)(F)C(F)(F)S(=O)(=O)Oc1ccccc1C#N                                 | -7.58 | 31.03 | 2.45 | P | IN  |
| QL03055 | 1,2-Ethanediyl<br>bis(perfluorobutanesulfonate)                                                                  | 92982-03-1   | FC(F)(F)C(F)(F)C(F)(F)C(F)(F)S(=O)(=O)OCCOS(=O)(=O)C(F)(F)C(F)(F)C(F)(F)C(F)(F)F   | -9.32 | 45.00 | 2.85 | P | IN  |
| QL03056 | 2-[(1,1,2,2,3,3,4,4,4-Nonafluorobutane-1-sulfonyl)oxy]-3a,4,7,7a-tetrahydro-1H-4,7-methanoisindole-1,3(2H)-dione | 307531-76-6  | FC(F)(F)C(F)(F)C(F)(F)C(F)(F)S(=O)(=O)ON1C(=O)C2C3CC(C=C3)C2C1=O                   | -7.27 | 24.32 | 2.50 | P | OUT |
| QL03057 | 1,1,2,2,3,3,4,4,4-nonafluoro-N-(2-hydroxyethyl)-1-Butanesulfonamide                                              | 34454-99-4   | FC(F)(F)C(F)(F)C(F)(F)C(F)(F)S(=O)(NCCO)=O                                         | -7.34 | 34.62 | 2.25 | P | IN  |
| QL03058 | [1-(1,1,2,2,3,3,4,4,4-Nonafluorobutane-1-sulfinyl)ethenyl]benzene                                                | 1606997-41-4 | FC(F)(F)C(F)(F)C(F)(F)C(F)(F)S(=O)C(=C)c1ccccc1                                    | -7.52 | 30.00 | 2.45 | P | OUT |
| QL03059 | Perfluoro-1-butanefulfonyl chloride                                                                              | 2991-84-6    | FC(F)(F)C(F)(F)C(F)(F)C(F)(F)S(Cl)(=O)=O                                           | -7.83 | 58.82 | 1.79 | P | IN  |
| QL03060 | Perfluorobutanefulfonyl chloride                                                                                 | 41006-41-1   | FC(F)(F)C(F)(F)C(F)(F)C(F)(F)S(Cl)=O                                               | -8.08 | 62.50 | 1.81 | P | IN  |
| QL03061 | Perfluorobutane sulfonamidoacetic acid                                                                           | 347872-22-4  | FC(F)(F)C(F)(F)C(F)(F)C(F)(F)S(NCC(=O)O)=O                                         | -7.42 | 36.00 | 2.24 | P | IN  |
| QL03062 | Perfluoroalkyl (linear) sulfinate, n=4                                                                           | 34642-43-8   | FC(F)(F)C(F)(F)C(F)(F)C(F)(F)S(O)=O                                                | -7.49 | 52.94 | 1.81 | P | IN  |
| QL03063 | [(Nonafluorobutyl)disulfonyl]benzene                                                                             | 1606997-42-5 | FC(F)(F)C(F)(F)C(F)(F)C(F)(F)SSc1ccccc1                                            | -7.75 | 34.62 | 2.43 | P | IN  |
| QL03064 | 1,1,1,2,2,3,3,4,5,5,5-Decafluoro-4-iodopentane                                                                   | 68158-13-4   | FC(F)(F)C(F)(F)C(F)(F)C(F)(F)I(F)(F)F                                              | -8.55 | 70.59 | 1.79 | P | OUT |
| QL03065 | 1,1,1,2,2,3,3,5,5,5-Decafluoro-4-iodo-4-(trifluoromethyl)pentane                                                 | 102780-88-1  | FC(F)(F)C(F)(F)C(F)(F)C(F)(F)C(F)(F)C(F)(F)F                                       | -8.36 | 70.00 | 1.72 | P | OUT |
| QL03066 | 1-ethoxy-2,2,3,3,4,4,4-heptafluorobutan-1-ol                                                                     | 356-26-3     | FC(F)(F)C(F)(F)C(F)(F)C(F)(F)OCC                                                   | -6.47 | 31.82 | 1.93 | P | IN  |
| QL03067 | 2,2,3,3,4,4,4-Heptafluoro-1-phenylbutyl diphenyl phosphate                                                       | 98010-21-0   | FC(F)(F)C(F)(F)C(F)(F)C(F)(F)C(OP(=O)(Oc1ccccc1)Oc1ccccc1)c1ccccc1                 | -6.46 | 14.00 | 2.42 | P | OUT |
| QL03068 | 3,3,4,4,5,5,5-heptafluoropent-1-yne                                                                              | 80337-25-3   | FC(F)(F)C(F)(F)C(F)(F)C(F)(F)C#C                                                   | -6.78 | 53.85 | 1.46 | P | IN  |
| QL03069 | 4,4,5,5,6,6,6-Heptafluoro-1-phenylhex-2-yn-1-one                                                                 | 89965-72-0   | FC(F)(F)C(F)(F)C(F)(F)C(F)(F)C#CC(=O)C1=CC=CC=C1                                   | -7.32 | 28.00 | 2.42 | P | OUT |
| QL03070 | (3,3,4,4,5,5,5-Heptafluoropent-1-yn-1-yl)benzene                                                                 | 81674-08-0   | FC(F)(F)C(F)(F)C(F)(F)C(F)(F)C#Cc1ccccc1                                           | -7.01 | 30.43 | 2.21 | P | IN  |
| QL03071 | Heptafluorobutyronitrile                                                                                         | 375-00-8     | FC(F)(F)C(F)(F)C(F)(F)C(F)(F)C#N                                                   | -7.06 | 58.33 | 1.46 | P | IN  |
| QL03072 | 3,3,4,4,5,5,5-heptafluoropent-1-ene                                                                              | 355-08-8     | FC(F)(F)C(F)(F)C(F)(F)C(F)(F)C=C                                                   | -6.34 | 46.67 | 1.46 | P | IN  |
| QL03073 | 3-(2,2,3,3,4,4,4-Heptafluorobutylidene)oxolan-2-one                                                              | 89608-45-7   | FC(F)(F)C(F)(F)C(F)(F)C(F)(F)C=C1CCOC1=O                                           | -6.41 | 31.82 | 1.90 | P | IN  |
| QL03074 | 4,4,5,5,6,6,6-Heptafluoro-1-phenylhex-2-en-1-one                                                                 | 110960-47-9  | FC(F)(F)C(F)(F)C(F)(F)C(F)(F)C=CC(=O)c1ccccc1                                      | -7.20 | 25.93 | 2.42 | P | OUT |
| QL03075 | 1,1,1,2,2,3,3,6,6,7,7,8,8,9,10,10,11,11,11-icosafuoroundec-4-ene                                                 | 100603-63-2  | FC(F)(F)C(F)(F)C(F)(F)C(F)(F)C=CC(F)(F)C(F)(F)C(F)(F)C(F)(F)C(F)(F)C(F)(F)C(F)(F)F | -9.91 | 60.61 | 2.68 | P | OUT |

|         |                                                                          |              |                                                                          |       |       |      |   |     |
|---------|--------------------------------------------------------------------------|--------------|--------------------------------------------------------------------------|-------|-------|------|---|-----|
| QL03076 | 1,1,1,2,2,3,3,6,6,7,7,8,8,9,9,10,10,10-Octadecafluorodec-4-ene           | 935477-16-0  | FC(F)(F)C(F)(F)C(F)(F)C=CC(F)(F)C(F)(F)C(F)(F)C(F)(F)C(F)(F)F            | -9.48 | 60.00 | 2.50 | P | IN  |
| QL03077 | 1,1,1,2,2,3,3,6,6,7,7,8,8,9,9,9-Hexadecafluoronon-4-ene                  | 935477-07-9  | FC(F)(F)C(F)(F)C(F)(F)C=CC(F)(F)C(F)(F)C(F)(F)C(F)(F)F                   | -9.16 | 59.26 | 2.38 | P | IN  |
| QL03078 | 1,1,1,2,2,3,3,6,6,7,7,8,8,8-Tetradecafluorooct-4-ene                     | 3910-82-5    | FC(F)(F)C(F)(F)C(F)(F)C=CC(F)(F)C(F)(F)C(F)(F)F                          | -8.62 | 58.33 | 2.16 | P | IN  |
| QL03080 | 3,3,4,4,5,5,5-Heptafluoro-1-iodo-1-pentene                               | 376-97-6     | FC(F)(F)C(F)(F)C(F)(F)C=CI                                               | -7.63 | 53.33 | 1.85 | P | IN  |
| QL03082 | (1E)-2,2,3,3,4,4,4-Heptafluoro-N-phenylbutan-1-imine                     | 62765-24-6   | FC(F)(F)C(F)(F)C(F)(F)C=NC1=CC=CC=C1                                     | -6.93 | 29.17 | 2.21 | P | OUT |
| QL03083 | (1E)-2,2,3,3,4,4,4-Heptafluoro-N-(2-phenylethyl)butan-1-imine            | 29723-32-8   | FC(F)(F)C(F)(F)C(F)(F)C=NCCC1=CC=CC=C1                                   | -7.12 | 23.33 | 2.46 | P | OUT |
| QL03084 | Perfluorobutyraldehyde                                                   | 375-02-0     | FC(F)(F)C(F)(F)C(F)(F)C=O                                                | -6.78 | 53.85 | 1.46 | P | IN  |
| QL03085 | Undecafluoro(heptafluoropropyl)cyclohexane                               | 374-59-4     | FC(F)(F)C(F)(F)C(F)(F)C1(F)C(F)(F)C(F)(F)C(F)(F)C1(F)F                   | -8.96 | 66.67 | 2.08 | P | IN  |
| QL03086 | 2,2,3,3,4,4,5,6,6-Nonafluoro-5-(heptafluoropropyl)oxane                  | 801-26-3     | FC(F)(F)C(F)(F)C(F)(F)C1(F)C(F)(F)OC(F)(F)C(F)(F)C1(F)F                  | -8.83 | 64.00 | 2.10 | P | IN  |
| QL03087 | 3,4,4-Trifluoro-3-(heptafluoropropyl)-1,2lambda~6~-oxathietane-2,2-dione | 156465-44-0  | FC(F)(F)C(F)(F)C(F)(F)C1(F)C(F)(F)OS1(=O)=O                              | -7.34 | 52.63 | 1.75 | P | IN  |
| QL03088 | 2,2,3,3,4,4,5,6-Nonafluoro-6-(heptafluoropropyl)tetrahydro-2H-pyran      | 335-35-3     | FC(F)(F)C(F)(F)C(F)(F)C1(F)OC(F)(F)C(F)(F)C(F)(F)C1(F)F                  | -8.86 | 64.00 | 2.11 | P | IN  |
| QL03089 | 2,2,3,3,4,4,5-Heptafluoro-5-(heptafluoropropyl)oxolane                   | 423-22-3     | FC(F)(F)C(F)(F)C(F)(F)C1(F)OC(F)(F)C(F)(F)C1(F)F                         | -8.31 | 63.64 | 1.88 | P | IN  |
| QL03090 | 2,2,3-Trifluoro-3-(heptafluoropropyl)oxirane                             | 74942-19-1   | FC(F)(F)C(F)(F)C(F)(F)C1(F)OC1(F)F                                       | -8.08 | 62.50 | 1.81 | P | IN  |
| QL03091 | 1,4-Bis(chloromethyl)-2-(heptafluoropropyl)benzene                       | 139263-35-7  | FC(F)(F)C(F)(F)C(F)(F)C1=C(CCl)C=CC(CCl)=C1                              | -7.01 | 33.33 | 2.13 | P | IN  |
| QL03092 | 5-(Heptafluoropropyl)-3-phenyl-1H-pyrazole                               | 54864-78-7   | FC(F)(F)C(F)(F)C(F)(F)C1=CC(=NN1)C1=CC=CC=C1                             | -7.15 | 25.00 | 2.43 | P | OUT |
| QL03093 | 6-(Heptafluoropropyl)-2-sulfanylidene-2,3-dihydropyrimidin-4(1H)-one     | 88191-88-2   | FC(F)(F)C(F)(F)C(F)(F)C1=CC(=O)NC(=S)N1                                  | -6.51 | 33.33 | 1.91 | P | IN  |
| QL03094 | 1-Bromo-3-(heptafluoropropyl)benzene                                     | 53104-06-6   | FC(F)(F)C(F)(F)C(F)(F)C1=CC(Br)=CC=C1                                    | -6.83 | 38.10 | 1.92 | P | IN  |
| QL03095 | 2-[[4-(Heptafluoropropyl)phenyl]methyl]oxirane                           | 144006-68-8  | FC(F)(F)C(F)(F)C(F)(F)C1=CC=C(C(C2CO2)C=C1                               | -7.26 | 24.14 | 2.50 | P | OUT |
| QL03096 | N-[6-(Heptafluoropropyl)-2-oxo-2H-pyran-3-yl]benzamide                   | 860454-18-8  | FC(F)(F)C(F)(F)C(F)(F)C1=CC=C(NC(=O)c2ccccc2)C(=O)O1                     | -7.59 | 20.59 | 2.75 | P | OUT |
| QL03097 | Quinoline, 4-(heptafluoropropyl)-                                        | 181059-73-4  | FC(F)(F)C(F)(F)C(F)(F)C1=CC=NC2=CC=CC=C12                                | -6.61 | 26.92 | 2.13 | P | OUT |
| QL03098 | AC1LC6EI                                                                 | 60007-37-6   | FC(F)(F)C(F)(F)C(F)(F)C1=CNC(=O)NC1=O                                    | -7.06 | 33.33 | 2.16 | P | IN  |
| QL03099 | 5-(Heptafluoropropyl)-2-sulfanylidene-2,3-dihydropyrimidin-4(1H)-one     | 145663-11-2  | FC(F)(F)C(F)(F)C(F)(F)C1=CNC(=S)NC1=O                                    | -7.06 | 33.33 | 2.16 | P | IN  |
| QL03100 | (4S)-4-Benzyl-2-(heptafluoropropyl)-4,5-dihydro-1,3-oxazole              | 1366341-52-7 | FC(F)(F)C(F)(F)C(F)(F)C1=N[C@@H](Cc2ccccc2)CO1                           | -7.15 | 21.88 | 2.52 | P | OUT |
| QL03101 | 2,4,6-Tris(heptafluoropropyl)-1,3,5-triazine                             | 915-76-4     | FC(F)(F)C(F)(F)C(F)(F)C1=NC(=NC(=N1)C(F)(F)C(F)(F)C(F)(F)C(F)(F)C(F)(F)F | -8.77 | 58.33 | 2.23 | P | IN  |
| QL03102 | MLS002694827                                                             | 4314-49-2    | FC(F)(F)C(F)(F)C(F)(F)C1=NC(=O)ON1                                       | -7.03 | 41.18 | 1.92 | P | IN  |
| QL03103 | Benzimidazole, 5(or 6)-chloro-2-(heptafluoropropyl)-                     | 6866-58-6    | FC(F)(F)C(F)(F)C(F)(F)C1=NC2=C(N1)C=C(C1)C=C2                            | -7.35 | 33.33 | 2.29 | P | IN  |
| QL03104 | 2-(Heptafluoropropyl)-1H-benzimidazole                                   | 559-37-5     | FC(F)(F)C(F)(F)C(F)(F)C1=NC2=CC=CC=C2N1                                  | -6.82 | 29.17 | 2.16 | P | OUT |
| QL03105 | 2-(Perfluoropropyl)benzoxazole                                           | 2008-06-2    | FC(F)(F)C(F)(F)C(F)(F)C1=NC2=CC=CC=C2O1                                  | -6.90 | 30.43 | 2.16 | P | IN  |
| QL03106 | 4-(Heptafluoropropyl)-1,3-dihydro-2H-1,5-benzodiazepin-2-one             | 96146-10-0   | FC(F)(F)C(F)(F)C(F)(F)C1=NC2CCCC2NC(=O)C1                                | -6.68 | 24.14 | 2.24 | P | OUT |

|         |                                                         |              |                                                           |       |       |      |   |     |
|---------|---------------------------------------------------------|--------------|-----------------------------------------------------------|-------|-------|------|---|-----|
| QL03107 | 2-(heptafluoropropyl)-4,5-dihydro-1h-imidazole          | 4472-70-2    | FC(F)(F)C(F)(F)C(F)(F)C1=NCCN1                            | -6.43 | 35.00 | 1.83 | P | IN  |
| QL03108 | 2-(Heptafluoropropyl)-1-phenyl-4,5-dihydro-1H-imidazole | 1069085-53-5 | FC(F)(F)C(F)(F)C(F)(F)C1=NCCN1c1ccccc1                    | -6.67 | 23.33 | 2.26 | P | OUT |
| QL03109 | 1-Benzyl-2-(heptafluoropropyl)-4,5-dihydro-1H-imidazole | 1069085-51-3 | FC(F)(F)C(F)(F)C(F)(F)C1=NCCN1Cc1ccccc1                   | -6.99 | 21.21 | 2.46 | P | OUT |
| QL03110 | 2-Perfluoropropyl-5-phenyl-1,3,4-oxadiazole             | 5756-67-2    | FC(F)(F)C(F)(F)C(F)(F)C1=NN=C(O1)C1=CC=CC=C1              | -7.27 | 26.92 | 2.43 | P | OUT |
| QL03111 | 5-(heptafluoropropyl)-1-phenyl-1h-tetrazole             | 2712-85-8    | FC(F)(F)C(F)(F)C(F)(F)C1=NN=NN1C1=CC=CC=C1                | -6.89 | 26.92 | 2.26 | P | OUT |
| QL03112 | 4-Bromo-2-(heptafluoropropyl)pyridine                   | 1816283-37-0 | FC(F)(F)C(F)(F)C(F)(F)c1cc(Br)ccn1                        | -6.95 | 40.00 | 1.92 | P | IN  |
| QL03113 | 4-Chloro-2-(heptafluoropropyl)pyridine                  | 1816283-32-5 | FC(F)(F)C(F)(F)C(F)(F)c1cc(Cl)ccn1                        | -6.95 | 40.00 | 1.92 | P | IN  |
| QL03114 | 1-Bromo-4-(heptafluoropropyl)benzene                    | 117874-91-6  | FC(F)(F)C(F)(F)C(F)(F)c1ccc(Br)cc1                        | -7.42 | 38.10 | 2.18 | P | IN  |
| QL03115 | 5-Bromo-2-(heptafluoropropyl)pyridine                   | 1816282-96-8 | FC(F)(F)C(F)(F)C(F)(F)c1ccc(Br)cn1                        | -7.53 | 40.00 | 2.18 | P | IN  |
| QL03116 | 1-(Heptafluoropropyl)-4-iodobenzene                     | 1417885-93-8 | FC(F)(F)C(F)(F)C(F)(F)c1ccc(I)cc1                         | -7.42 | 38.10 | 2.18 | P | IN  |
| QL03117 | N-[5-(Heptafluoropropyl)][1,1'-biphenyl]-2-yl]benzamide | 748785-00-4  | FC(F)(F)C(F)(F)C(F)(F)c1ccc(NC(=O)c2ccccc2)c(c1)-c1ccccc1 | -7.34 | 15.56 | 2.78 | P | OUT |
| QL03118 | 2-(Heptafluoropropyl)quinoline                          | 57702-79-1   | FC(F)(F)C(F)(F)C(F)(F)c1ccc2ccccc2n1                      | -6.95 | 26.92 | 2.29 | P | OUT |
| QL03119 | 5-(Heptafluoropropyl)isoquinoline-1-carbaldehyde        | 31181-32-5   | FC(F)(F)C(F)(F)C(F)(F)c1cccc2c(C=O)nccc12                 | -6.74 | 25.00 | 2.24 | P | OUT |
| QL03120 | (Heptafluoropropyl)benzene                              | 378-98-3     | FC(F)(F)C(F)(F)C(F)(F)c1ccccc1                            | -6.54 | 33.33 | 1.92 | P | IN  |
| QL03121 | 2-(Heptafluoropropyl)cyclohexan-1-one                   | 61282-91-5   | FC(F)(F)C(F)(F)C(F)(F)C1CCCCC1=O                          | -6.10 | 26.92 | 1.90 | P | OUT |
| QL03122 | 1-(heptafluoropropyl)-2-iodocyclohexane                 | 2728-75-8    | FC(F)(F)C(F)(F)C(F)(F)C1CCCCC1I                           | -6.27 | 29.63 | 1.90 | P | IN  |
| QL03123 | 3-(Heptafluoropropyl)oxolane 5-                         | 143837-48-3  | FC(F)(F)C(F)(F)C(F)(F)C1CCOC1                             | -6.23 | 31.82 | 1.83 | P | IN  |
| QL03124 | (Heptafluoropropyl)dihydropyrimidine-2,4(1H,3H)-dione   | 90715-84-7   | FC(F)(F)C(F)(F)C(F)(F)C1CNC(=O)NC1=O                      | -6.88 | 30.43 | 2.16 | P | IN  |
| QL03125 | 5-(Heptafluoropropyl)pyrimidine                         | 1354703-21-1 | FC(F)(F)C(F)(F)C(F)(F)c1cncnc1                            | -6.76 | 36.84 | 1.92 | P | IN  |
| QL03126 | 2-(Heptafluoropropyl)oxirane                            | 51035-20-2   | FC(F)(F)C(F)(F)C(F)(F)C1CO1                               | -6.16 | 43.75 | 1.46 | P | IN  |
| QL03127 | 5-(Heptafluoropropyl)-1H-pyrrole-2-carbaldehyde         | 123825-52-5  | FC(F)(F)C(F)(F)C(F)(F)c1Nc(C=O)cc1                        | -7.12 | 33.33 | 2.18 | P | IN  |
| QL03128 | 4,6-Dichloro-2-(heptafluoropropyl)pyrimidine            | 1023815-51-1 | FC(F)(F)C(F)(F)C(F)(F)c1nc(Cl)cc(Cl)n1                    | -7.37 | 47.37 | 1.91 | P | IN  |
| QL03129 | 2-(Heptafluoropropyl)-1H-indole                         | 123825-50-3  | FC(F)(F)C(F)(F)C(F)(F)c1Nc2ccccc2c1                       | -6.75 | 28.00 | 2.16 | P | OUT |
| QL03130 | 2-(Heptafluoropropyl)-3-phenylquinoxaline               | 69492-70-2   | FC(F)(F)C(F)(F)C(F)(F)c1nc2ccccc2nc1-c1ccccc1             | -6.35 | 20.00 | 2.21 | P | OUT |
| QL03131 | 4-Chloro-2-(heptafluoropropyl)pyrimidine                | 937676-00-1  | FC(F)(F)C(F)(F)C(F)(F)c1nccc(Cl)n1                        | -7.08 | 42.11 | 1.92 | P | IN  |
| QL03132 | 2-(Heptafluoropropyl)-1H-pyrrole                        | 118425-75-5  | FC(F)(F)C(F)(F)C(F)(F)c1Nccc1                             | -6.54 | 36.84 | 1.83 | P | IN  |
| QL03133 | 1-(Heptafluoropropyl)isoquinoline                       | 70414-12-9   | FC(F)(F)C(F)(F)C(F)(F)c1nccc2ccccc12                      | -6.61 | 26.92 | 2.13 | P | OUT |
| QL03134 | 2-(Heptafluoropropyl)pyrimidine                         | 133391-64-7  | FC(F)(F)C(F)(F)C(F)(F)c1ncccn1                            | -6.76 | 36.84 | 1.92 | P | IN  |
| QL03135 | Imidazolidine, 2-heptafluoropropyl-                     | 31185-53-2   | FC(F)(F)C(F)(F)C(F)(F)C1NCCN1                             | -6.23 | 31.82 | 1.83 | P | IN  |
| QL03136 | 2-(Heptafluoropropyl)-1H-imidazole                      | 81769-47-3   | FC(F)(F)C(F)(F)C(F)(F)c1Nccn1                             | -6.67 | 38.89 | 1.83 | P | IN  |
| QL03138 | 4-Bromo-3-(heptafluoropropyl)-5-phenyl-1H-pyrazole      | 82633-52-1   | FC(F)(F)C(F)(F)C(F)(F)c1nNc(c1Br):c1ccccc1                | -7.36 | 28.57 | 2.42 | P | OUT |

|         |                                                                          |              |                                                                      |       |       |      |   |     |
|---------|--------------------------------------------------------------------------|--------------|----------------------------------------------------------------------|-------|-------|------|---|-----|
| QL03139 | 5-(Heptafluoropropyl)-3-phenyl-1H-1,2,4-triazole                         | 2195-67-7    | FC(F)(F)C(F)(F)C(F)(F)c1Nnc(n1)-c1ccccc1                             | -7.21 | 25.93 | 2.43 | P | OUT |
| QL03140 | 3-(Heptafluoropropyl)-6-(morpholin-4-yl)[1,2,4]triazolo[4,3-b]pyridazine | 296886-61-8  | FC(F)(F)C(F)(F)C(F)(F)c1nnc2cccc(n12)N1CCOCC1                        | -7.07 | 20.00 | 2.53 | P | OUT |
| QL03141 | 3-(Heptafluoropropyl)-1H-pyrazole                                        | 158148-63-1  | FC(F)(F)C(F)(F)C(F)(F)c1nNcc1                                        | -6.67 | 38.89 | 1.83 | P | IN  |
| QL03142 | 2(5H)-Furanone, 5-(heptafluoropropyl)-                                   | 143469-51-6  | FC(F)(F)C(F)(F)C(F)(F)C1OC(=O)C=C1                                   | -6.76 | 36.84 | 1.92 | P | IN  |
| QL03143 | 2-(Heptafluoropropyl)-1,3-dioxolane                                      | 109799-66-8  | FC(F)(F)C(F)(F)C(F)(F)C1OCCO1                                        | -6.43 | 35.00 | 1.83 | P | IN  |
| QL03144 | Allyl heptafluorobutryate                                                | 17165-55-8   | FC(F)(F)C(F)(F)C(F)(F)CC(=O)OC=C                                     | -7.05 | 33.33 | 2.15 | P | IN  |
| QL03145 | 1,1,1,2,2,3,3,10,10,11,11,12,12,12-Tetradecafluoro-5,8-diiodododecane    | 2357-30-4    | FC(F)(F)C(F)(F)C(F)(F)CC(I)CCC(I)CC(F)(F)C(F)(F)C(F)(F)F             | -8.69 | 42.11 | 2.65 | P | IN  |
| QL03146 | 1,1,1,2,2,3,3,11,11,12,12,13,13,13-Tetradecafluoro-5,9-diiodotridecane   | 1644-06-0    | FC(F)(F)C(F)(F)C(F)(F)CC(I)CCCC(I)CC(F)(F)C(F)(F)C(F)(F)F            | -8.78 | 39.02 | 2.77 | P | IN  |
| QL03147 | Trichloro(3,3,4,4,5,5,5-heptafluoropentyl)silane                         | 866-24-0     | FC(F)(F)C(F)(F)C(F)(F)CC[Si](Cl)(Cl)Cl                               | -7.53 | 50.00 | 1.91 | P | IN  |
| QL03148 | 3,3,4,4,5,5,5-heptafluoropentanal                                        | 126015-32-5  | FC(F)(F)C(F)(F)C(F)(F)CC=O                                           | -7.03 | 43.75 | 1.85 | P | IN  |
| QL03149 | (2,2,3,3,4,4,4-Heptafluorobutyl)benzene                                  | 81664-99-5   | FC(F)(F)C(F)(F)C(F)(F)C1ccccc1                                       | -6.75 | 29.17 | 2.13 | P | IN  |
| QL03150 | 1H,1H-Heptafluorobutyl epoxide                                           | 1765-92-0    | FC(F)(F)C(F)(F)C(F)(F)CC1CO1                                         | -6.56 | 36.84 | 1.84 | P | IN  |
| QL03151 | 2-(2,2,3,3,4,4,4-Heptafluorobutyl)-1,3-dioxolane                         | 175607-87-1  | FC(F)(F)C(F)(F)C(F)(F)CC1OCCO1                                       | -6.37 | 30.43 | 1.92 | P | IN  |
| QL03152 | 5-Bromo-1,1,1,2,2,3,3-heptafluoropentane                                 | 355-94-2     | FC(F)(F)C(F)(F)C(F)(F)CCBr                                           | -7.24 | 47.06 | 1.85 | P | IN  |
| QL03153 | 1,1,1,2,2,3,3,4,4,5,5,6,6,9,9,10,10,11,11,11-Icosafluoroundecane         | 777931-73-4  | FC(F)(F)C(F)(F)C(F)(F)CCCC(F)(F)C(F)(F)C(F)(F)C(F)(F)C(F)(F)C(F)(F)F | -9.69 | 57.14 | 2.68 | P | IN  |
| QL03154 | 1,1,1,2,2,3,3,6,6,7,7,8,8,8-Tetradecafluorooctane                        | 1835251-92-7 | FC(F)(F)C(F)(F)C(F)(F)CCCC(F)(F)C(F)(F)C(F)(F)F                      | -8.34 | 53.85 | 2.16 | P | IN  |
| QL03155 | 7-Bromo-1,1,1,2,2,3,3-heptafluoroheptane                                 | 1391033-22-9 | FC(F)(F)C(F)(F)C(F)(F)CCCCBr                                         | -7.19 | 34.78 | 2.17 | P | IN  |
| QL03156 | 1,1,1,2,2,3,3,10,10,11,11,12,12,12-Tetradecafluorododecane               | 69125-82-2   | FC(F)(F)C(F)(F)C(F)(F)CCCCCCC(F)(F)C(F)(F)C(F)(F)F                   | -8.27 | 36.84 | 2.60 | P | IN  |
| QL03157 | 1,1,1,2,2,3,3,12,12,13,13,14,14,14-Tetradecafluorotetradecane            | 1835251-91-6 | FC(F)(F)C(F)(F)C(F)(F)CCCCCCCC(F)(F)C(F)(F)C(F)(F)F                  | -8.37 | 31.82 | 2.79 | P | OUT |
| QL03158 | 1,1,1,2,2,3,3,14,14,15,15,16,16,16-Tetradecafluorohexadecane             | 168169-26-4  | FC(F)(F)C(F)(F)C(F)(F)CCCCCCCCC(F)(F)C(F)(F)C(F)(F)F                 | -8.51 | 28.00 | 2.96 | P | OUT |
| QL03159 | 1,1,1,2,2,3,3-Heptafluoro-7-iodoheptane                                  | 2967-60-4    | FC(F)(F)C(F)(F)C(F)(F)CCCCI                                          | -7.19 | 34.78 | 2.17 | P | IN  |
| QL03160 | 1,1,1,2,2,3,3-Heptafluoro-5-iodopentane                                  | 68188-12-5   | FC(F)(F)C(F)(F)C(F)(F)CCI                                            | -7.24 | 47.06 | 1.85 | P | IN  |
| QL03161 | 1,1,1,2,2,3,3-Heptafluoro-4-chlorobutane                                 | 374-97-0     | FC(F)(F)C(F)(F)C(F)(F)CCl                                            | -6.98 | 57.14 | 1.46 | P | IN  |
| QL03162 | Heptafluorobutyl iodide                                                  | 374-98-1     | FC(F)(F)C(F)(F)C(F)(F)CI                                             | -6.98 | 57.14 | 1.46 | P | IN  |
| QL03163 | 1-chloro-1,1,2,2,3,3,3-heptafluoropropane                                | 422-86-6     | FC(F)(F)C(F)(F)C(F)(F)Cl                                             | -7.64 | 72.73 | 1.32 | P | OUT |
| QL03164 | N-Nitrosobis(2,2,3,3,4,4,4-heptafluorobutyl)amine                        | 83329-16-2   | FC(F)(F)C(F)(F)C(F)(F)CN(CC(F)(F)C(F)(F)C(F)(F)F)N=O                 | -8.53 | 48.28 | 2.40 | P | IN  |
| QL03165 | Isocyanic acid, 2,2,3,3,4,4,4-heptafluorobutyl ester                     | 377-00-4     | FC(F)(F)C(F)(F)C(F)(F)CN=C=O                                         | -7.25 | 43.75 | 1.95 | P | IN  |
| QL03166 | N-(2,2,3,3,4,4,4-Heptafluorobutyl)prop-2-enamide                         | 1422-65-7    | FC(F)(F)C(F)(F)C(F)(F)CNC(=O)C=C                                     | -6.95 | 31.82 | 2.15 | P | IN  |
| QL03167 | 3-Benzamido-N-(2,2,3,3,4,4,4-heptafluorobutyl)benzamide                  | 917920-92-4  | FC(F)(F)C(F)(F)C(F)(F)CNC(=O)C1=CC(NC(=O)C2=CC=CC=C2)=CC=C1          | -7.74 | 16.67 | 2.93 | P | OUT |

|         |                                                                                |              |                                                                                          |       |       |      |   |     |
|---------|--------------------------------------------------------------------------------|--------------|------------------------------------------------------------------------------------------|-------|-------|------|---|-----|
| QL03168 | N-(2,2,3,3,4,4,4-Heptafluorobutyl)benzamide                                    | 304458-19-3  | FC(F)(F)C(F)(F)C(F)(F)CNC(=O)c1ccccc1                                                    | -7.14 | 25.00 | 2.42 | P | OUT |
| QL03169 | 2,2,3,3,4,4,4-Heptafluoro-N-(2,2,3,3,4,4,4-heptafluorobutyl)butan-1-amine      | 356-08-1     | FC(F)(F)C(F)(F)C(F)(F)CNCC(F)(F)C(F)(F)C(F)(F)F                                          | -8.47 | 50.00 | 2.33 | P | IN  |
| QL03170 | Tris(1H,1H-heptafluorobutyl)phosphate                                          | 563-09-7     | FC(F)(F)C(F)(F)C(F)(F)CO[P](=O)(OCC(F)(F)C(F)(F)C(F)(F)C(F)(F)F)OCC(F)(F)C(F)(F)C(F)(F)F | -8.79 | 47.73 | 2.53 | P | IN  |
| QL03171 | Chlorotris(2,2,3,3,4,4,4-heptafluorobutoxy)silane                              | 757-72-2     | FC(F)(F)C(F)(F)C(F)(F)CO[Si](Cl)(OCC(F)(F)C(F)(F)C(F)(F)F)OCC(F)(F)C(F)(F)C(F)(F)F       | -8.93 | 50.00 | 2.53 | P | IN  |
| QL03172 | tris((Perfluoropropyl)methyl)borate                                            | 755-53-3     | FC(F)(F)C(F)(F)C(F)(F)COB(OCC(F)(F)C(F)(F)C(F)(F)F)OCC(F)(F)C(F)(F)C(F)(F)F              | -8.81 | 48.84 | 2.51 | P | IN  |
| QL03173 | 2,2,3,3,4,4,4-Heptafluorobutyl 2-cyanoprop-2-enoate                            | 130192-28-8  | FC(F)(F)C(F)(F)C(F)(F)COC(=O)C(=C)C#N                                                    | -7.09 | 31.82 | 2.21 | P | IN  |
| QL03174 | 2,2,3,3,4,4,4-Heptafluorobutyl 2-chloroprop-2-enoate                           | 74359-14-1   | FC(F)(F)C(F)(F)C(F)(F)COC(=O)C(Cl)=C                                                     | -7.30 | 38.10 | 2.13 | P | IN  |
| QL03175 | 2,2,3,3,4,4,4-Heptafluorobutyl heptafluorobutanoate                            | 308-45-2     | FC(F)(F)C(F)(F)C(F)(F)COC(=O)C(F)(F)C(F)(F)C(F)(F)F                                      | -8.79 | 53.85 | 2.36 | P | IN  |
| QL03176 | 1H,1H-Perfluorobutyl acrylate                                                  | 424-64-6     | FC(F)(F)C(F)(F)C(F)(F)COC(=O)C=C                                                         | -7.05 | 33.33 | 2.15 | P | IN  |
| QL03177 | Bis(1H,1H-perfluorobutyl)fumarate                                              | 24120-17-0   | FC(F)(F)C(F)(F)C(F)(F)COC(=O)C=CC(=O)OCC(F)(F)C(F)(F)C(F)(F)F                            | -8.88 | 38.89 | 2.82 | P | IN  |
| QL03178 | 2,2,3,3,4,4,4-Heptafluorobutyl 1,2,3-benzothiadiazole-7-carboxylate            | 1384278-50-5 | FC(F)(F)C(F)(F)C(F)(F)COC(=O)c1cccc2nnsc12                                               | -7.04 | 25.00 | 2.38 | P | OUT |
| QL03179 | 2,2,3,3,4,4,4-Heptafluorobutyl but-3-enoate                                    | 17165-56-9   | FC(F)(F)C(F)(F)C(F)(F)COC(=O)CC=C                                                        | -6.96 | 29.17 | 2.23 | P | OUT |
| QL03180 | 1-Aziridinepropionic acid, 2,2,3,3,4,4,4-heptafluorobutyl ester                | 24160-20-1   | FC(F)(F)C(F)(F)C(F)(F)COC(=O)CCN1CC1                                                     | -7.12 | 24.14 | 2.44 | P | OUT |
| QL03181 | Bis(2,2,3,3,4,4,4-heptafluorobutyl) carbonate                                  | 1026739-75-2 | FC(F)(F)C(F)(F)C(F)(F)COC(=O)OCC(F)(F)C(F)(F)C(F)(F)F                                    | -8.81 | 46.67 | 2.57 | P | IN  |
| QL03182 | 2,2,3,3,4,4,4-Heptafluorobutyl carbonochloridate                               | 108156-21-4  | FC(F)(F)C(F)(F)C(F)(F)COC(Cl)=O                                                          | -7.41 | 47.06 | 1.93 | P | IN  |
| QL03183 | 4-(Ethenyloxy)-1,1,1,2,2,3,3-heptafluorobutane                                 | 356-00-3     | FC(F)(F)C(F)(F)C(F)(F)COC=C                                                              | -6.82 | 36.84 | 1.95 | P | IN  |
| QL03184 | 1-Ethenyl-4-(2,2,3,3,4,4,4-heptafluorobutoxy)benzene                           | 111144-99-1  | FC(F)(F)C(F)(F)C(F)(F)COC1=CC=C(C=C)C=C1                                                 | -7.36 | 24.14 | 2.55 | P | OUT |
| QL03185 | 2-[[4-(Perfluorobutoxy)pyridin-2-yl]methanesulfinyl]-1H-thieno[3,4-d]imidazole | NOCAS_869668 | FC(F)(F)C(F)(F)C(F)(F)COC1=CC=NC(CS(=O)C2=NC3=CSC=C3N2)=C1                               | -7.86 | 17.95 | 2.94 | P | OUT |
| QL03186 | 4-(2,2,3,3,4,4,4-Heptafluorobutoxy)benzaldehyde                                | 943767-44-0  | FC(F)(F)C(F)(F)C(F)(F)COC1ccc(C=O)cc1                                                    | -7.47 | 25.93 | 2.55 | P | OUT |
| QL03187 | 4-(2,2,3,3,4,4,4-Heptafluorobutoxy)benzonitrile                                | 96308-32-6   | FC(F)(F)C(F)(F)C(F)(F)COC1ccc(cc1)C#N                                                    | -7.53 | 26.92 | 2.55 | P | OUT |
| QL03188 | 1,1,1,2,2,3,3-Heptafluoro-4-(2,2,3,3,4,4,4-heptafluorobutoxy)butane            | 647-91-6     | FC(F)(F)C(F)(F)C(F)(F)COCC(F)(F)C(F)(F)C(F)(F)F                                          | -8.58 | 51.85 | 2.33 | P | IN  |
| QL03189 | Allyl 1H,1H-heptafluorobutyl ether                                             | 648-42-0     | FC(F)(F)C(F)(F)C(F)(F)COCC=C                                                             | -7.01 | 31.82 | 2.17 | P | IN  |
| QL03190 | NSC221106                                                                      | 59727-25-2   | FC(F)(F)C(F)(F)C(F)(F)COCC1=CNC(=O)NC1=O                                                 | -7.25 | 25.00 | 2.47 | P | OUT |
| QL03191 | 2-[[2,2,3,3,4,4,4-Heptafluorobutoxy)methyl]oxirane                             | 648-43-1     | FC(F)(F)C(F)(F)C(F)(F)COCC1CO1                                                           | -6.87 | 30.43 | 2.15 | P | IN  |
| QL03192 | 4-[[2,2,3,3,4,4,4-Heptafluorobutoxy)methyl]-1,3-dioxolan-2-one                 | 181044-06-4  | FC(F)(F)C(F)(F)C(F)(F)COCC1COC(=O)O1                                                     | -7.19 | 26.92 | 2.39 | P | OUT |
| QL03193 | 4-(2-Chloroethoxy)-1,1,1,2,2,3,3-heptafluorobutane                             | 679-53-8     | FC(F)(F)C(F)(F)C(F)(F)COCCCl                                                             | -7.39 | 38.10 | 2.17 | P | IN  |
| QL03194 | 2,2,3,3,4,4,4-Heptafluorobutyl diphenylphosphinate                             | 55776-72-2   | FC(F)(F)C(F)(F)C(F)(F)COP(=O)(c1ccccc1)c1ccccc1                                          | -6.59 | 18.42 | 2.36 | P | OUT |



|         |                                                                                                                                   |             |                                                                                                                                                                         |        |       |      |   |     |
|---------|-----------------------------------------------------------------------------------------------------------------------------------|-------------|-------------------------------------------------------------------------------------------------------------------------------------------------------------------------|--------|-------|------|---|-----|
| QL03195 | Bis(2,2,3,3,4,4,4-heptafluorobutyl) phenylphosphonate                                                                             | 31430-72-5  | FC(F)(F)C(F)(F)C(F)(F)COP(=O)(OCC(F)(F)C(F)(F)C(F)(F)F)c1ccccc1                                                                                                         | -8.24  | 34.15 | 2.67 | P | IN  |
| QL03196 | bis((Perfluoropropyl)methyl) phosphorochloridoate                                                                                 | 6780-81-0   | FC(F)(F)C(F)(F)C(F)(F)COP(Cl)(=O)OCC(F)(F)C(F)(F)C(F)(F)F                                                                                                               | -8.95  | 48.39 | 2.59 | P | IN  |
| QL03197 | 1,3,5,2,4,6-Triazatriphosphorine, 2,2,4,4,6,6-hexakis(2,2,3,3,4,4,4-heptafluorobutoxy)-2,2,4,4,6,6-hexahydro-1H,1H-Perfluorobutyl | 470-73-5    | FC(F)(F)C(F)(F)C(F)(F)COP1(OCC(F)(F)C(F)(F)C(F)(F)F)=NP(OCC(F)(F)C(F)(F)C(F)(F)F)(OCC(F)(F)C(F)(F)C(F)(F)F)=NP(OCC(F)(F)C(F)(F)C(F)(F)COP1(OCC(F)(F)C(F)(F)C(F)(F)F)=N1 | -8.81  | 46.67 | 2.57 | P | IN  |
| QL03198 | perfluorobutanesulfonate                                                                                                          | 883499-32-9 | FC(F)(F)C(F)(F)C(F)(F)COS(=O)(=O)C(F)(F)C(F)(F)C(F)(F)C(F)(F)F                                                                                                          | -9.07  | 53.33 | 2.50 | P | IN  |
| QL03199 | 1H,1H-Heptafluorobutyl triflate                                                                                                   | 6401-01-0   | FC(F)(F)C(F)(F)C(F)(F)COS(=O)(=O)C(F)(F)F                                                                                                                               | -7.79  | 47.62 | 2.09 | P | IN  |
| QL03200 | [[[2,2,3,3,4,4,4-Heptafluorobutyl)sulfonyl]methyl] benzene                                                                        | 200337-06-0 | FC(F)(F)C(F)(F)C(F)(F)CSCc1ccccc1                                                                                                                                       | -7.07  | 25.00 | 2.39 | P | OUT |
| QL03201 | Perflutren                                                                                                                        | 76-19-7     | FC(F)(F)C(F)(F)C(F)(F)F                                                                                                                                                 | -7.64  | 72.73 | 1.32 | P | OUT |
| QL03202 | Heptafluoropropyl iodide                                                                                                          | 754-34-7    | FC(F)(F)C(F)(F)C(F)(F)I                                                                                                                                                 | -7.64  | 72.73 | 1.32 | P | OUT |
| QL03203 | Perfluoro-N,N,N',N'-tetrakis(heptafluoropropyl)-1,6-hexanediamine                                                                 | 143356-32-5 | FC(F)(F)C(F)(F)C(F)(F)N(C(F)(F)C(F)(F)C(F)(F)C(F)(F)C(F)(F)C(F)(F)C(F)(F)C(F)(F)N(C(F)(F)C(F)(F)C(F)(F)C(F)(F)C(F)(F)C(F)(F)F                                           | -10.58 | 66.67 | 2.81 | P | OUT |
| QL03204 | Perfluamine                                                                                                                       | 338-83-0    | FC(F)(F)C(F)(F)C(F)(F)N(C(F)(F)C(F)(F)C(F)(F)C(F)(F)C(F)(F)C(F)(F)C(F)(F)F                                                                                              | -8.93  | 67.74 | 2.04 | P | OUT |
| QL03205 | 1,1,1,2,4,5,5-Octafluoro-2-(heptafluoropropoxy)-4-(trifluoromethyl)pentan-3-one                                                   | 851535-00-7 | FC(F)(F)C(F)(F)C(F)(F)OC(F)(C(=O)C(F)(C(F)(F)F)C(F)(F)F)C(F)(F)F                                                                                                        | -8.86  | 62.07 | 2.17 | P | IN  |
| QL03206 | 1,5-Dideoxy-1,1,1,5,5,5-hexafluoro-2,4-di-C-fluoro-2,4-bis-O-(heptafluoropropyl)pent-3-ulose                                      | 67118-49-4  | FC(F)(F)C(F)(F)C(F)(F)OC(F)(C(=O)C(F)(OC(F)(F)C(F)(F)C(F)(F)C(F)(F)C(F)(F)C(F)(F)F                                                                                      | -9.87  | 61.11 | 2.65 | P | IN  |
| QL03207 | 1,1,1,2,6,7,7-Octafluoro-2,6-bis(heptafluoropropoxy)heptane-3,5-dione                                                             | 87405-74-1  | FC(F)(F)C(F)(F)C(F)(F)OC(F)(C(=O)CC(=O)C(F)(OC(F)(F)C(F)(F)C(F)(F)C(F)(F)C(F)(F)C(F)(F)F                                                                                | -9.80  | 53.66 | 2.82 | P | IN  |
| QL03208 | 2,3,3,3-Tetrafluoro-2-(heptafluoropropoxy)-1-(piperidin-1-yl)propan-1-one                                                         | 176702-72-0 | FC(F)(F)C(F)(F)C(F)(F)OC(F)(C(=O)N1CCCCC1)C(F)(F)F                                                                                                                      | -7.61  | 31.43 | 2.45 | P | IN  |
| QL03209 | 2,3,3,3-Tetrafluoro-2-(heptafluoropropoxy)-1-(morpholin-4-yl)propan-1-one                                                         | 176702-73-1 | FC(F)(F)C(F)(F)C(F)(F)OC(F)(C(=O)N1CCOCC1)C(F)(F)F                                                                                                                      | -7.72  | 33.33 | 2.45 | P | IN  |
| QL03210 | N-Benzyl-2,3,3,3-tetrafluoro-2-(heptafluoropropoxy)propanamide                                                                    | 82970-41-0  | FC(F)(F)C(F)(F)C(F)(F)OC(F)(C(=O)NCc1ccccc1)C(F)(F)F                                                                                                                    | -8.14  | 31.43 | 2.70 | P | OUT |
| QL03211 | Cyclohexyl 2,3,3,3-tetrafluoro-2-(heptafluoropropoxy)propanoate                                                                   | 78755-41-6  | FC(F)(F)C(F)(F)C(F)(F)OC(F)(C(=O)OC1CCCCC1)C(F)(F)F                                                                                                                     | -7.67  | 29.73 | 2.53 | P | OUT |
| QL03212 | Phenyl 2,3,3,3-tetrafluoro-2-(heptafluoropropoxy)propanoate                                                                       | 78755-31-4  | FC(F)(F)C(F)(F)C(F)(F)OC(F)(C(=O)Oc1ccccc1)C(F)(F)F                                                                                                                     | -8.02  | 35.48 | 2.53 | P | IN  |
| QL03213 | Prop-2-en-1-yl 2,3,3,3-tetrafluoro-2-(heptafluoropropoxy)propanoate                                                               | 84123-65-9  | FC(F)(F)C(F)(F)C(F)(F)OC(F)(C(=O)OCC=C)C(F)(F)F                                                                                                                         | -8.10  | 39.29 | 2.46 | P | IN  |
| QL03214 | Benzyl 2,3,3,3-tetrafluoro-2-(heptafluoropropoxy)propanoate                                                                       | 147224-19-9 | FC(F)(F)C(F)(F)C(F)(F)OC(F)(C(=O)OCc1ccccc1)C(F)(F)F                                                                                                                    | -8.20  | 32.35 | 2.70 | P | IN  |
| QL03215 | bis(2,3,3,3-tetrafluoro-2-(heptafluoropropoxy)-1-oxopropyl)peroxide                                                               | 56347-79-6  | FC(F)(F)C(F)(F)C(F)(F)OC(F)(C(=O)OOC(=O)C(F)(OC(F)(F)C(F)(F)C(F)(F)C(F)(F)C(F)(F)C(F)(F)F                                                                               | -9.99  | 55.00 | 2.87 | P | OUT |
| QL03216 | 2,3,3,3-Tetrafluoro-2-(heptafluoropropoxy)propanoyl chloride                                                                      | 72848-57-8  | FC(F)(F)C(F)(F)C(F)(F)OC(F)(C(Cl)=O)C(F)(F)F                                                                                                                            | -8.02  | 60.00 | 1.85 | P | IN  |



|         |                                                                                                        |              |                                                                                                                                |        |       |      |   |     |
|---------|--------------------------------------------------------------------------------------------------------|--------------|--------------------------------------------------------------------------------------------------------------------------------|--------|-------|------|---|-----|
| QL03233 | 2-[1,2,2,2-Tetrafluoro-1-[1,1,2,3,3,3-hexafluoro-2-(heptafluoropropoxy)propoxy]ethyl]-1H-benzimidazole | 76145-90-9   | FC(F)(F)C(F)(F)C(F)(F)OC(F)(C(F)(F)C(F)(F)OC(F)(C1=NC2=CC=CC=C2N1)C(F)(F)F                                                     | -8.77  | 41.46 | 2.70 | P | IN  |
| QL03234 | 2,3,3,3-Tetrafluoro-2-[1,1,2,3,3,3-hexafluoro-2-(heptafluoropropoxy)propoxy]propyl prop-2-enoate       | 17559-01-2   | FC(F)(F)C(F)(F)C(F)(F)OC(F)(C(F)(F)C(F)(F)OC(F)(COC(=O)C=C)C(F)(F)F                                                            | -8.99  | 44.74 | 2.71 | P | IN  |
| QL03235 | Perfluoro-5,6-dimethyl-4,7-dioxadecane                                                                 | 2501-01-1    | FC(F)(F)C(F)(F)C(F)(F)OC(F)(C(F)(F)C(F)(F)OC(F)(F)C(F)(F)C(F)(F)C(F)(F)F                                                       | -9.76  | 64.71 | 2.50 | P | IN  |
| QL03236 | 1,1,1,3,4,4,4-Heptafluoro-3-(heptafluoropropoxy)-2-(trifluoromethyl)butan-2-yl prop-2-enoate           | 1622868-66-9 | FC(F)(F)C(F)(F)C(F)(F)OC(F)(C(F)(F)C(F)C(OC(=O)C=C)C(F)(F)C(F)(F)F                                                             | -8.54  | 50.00 | 2.36 | P | IN  |
| QL03237 | 2,3,3,3-Tetrafluoro-2-(heptafluoropropoxy)propanenitrile                                               | 60308-66-9   | FC(F)(F)C(F)(F)C(F)(F)OC(F)(C#N)C(F)(F)F                                                                                       | -7.94  | 57.89 | 1.87 | P | IN  |
| QL03238 | 3,4,4,4-Tetrafluoro-3-(heptafluoropropoxy)but-1-ene                                                    | 131628-34-7  | FC(F)(F)C(F)(F)C(F)(F)OC(F)(C=C)C(F)(F)F                                                                                       | -7.46  | 50.00 | 1.87 | P | IN  |
| QL03239 | 1,1,1,2-Tetrafluoro-2-(heptafluoropropoxy)-4-iodobutane                                                | 243128-38-3  | FC(F)(F)C(F)(F)C(F)(F)OC(F)(CCI)C(F)(F)F                                                                                       | -7.89  | 50.00 | 2.06 | P | IN  |
| QL03240 | 1,2-Dichloro-1,2,2-trifluoroethyl heptafluoropropyl ether                                              | 106372-30-9  | FC(F)(F)C(F)(F)C(F)(F)OC(F)(Cl)C(F)(F)Cl                                                                                       | -8.53  | 66.67 | 1.89 | P | OUT |
| QL03241 | 3-[2,3,3,3-Tetrafluoro-2-(heptafluoropropoxy)propoxy]prop-1-ene                                        | 119511-16-9  | FC(F)(F)C(F)(F)C(F)(F)OC(F)(COCC=C)C(F)(F)F                                                                                    | -8.06  | 37.93 | 2.48 | P | IN  |
| QL03242 | (R*,S*)-1,1,2,3,4,4-Hexafluoro-1,2,3,4-tetrakis(heptafluoropropoxy)butane                              | 54572-17-7   | FC(F)(F)C(F)(F)C(F)(F)OC(F)(F)[C@@](F)(OC(F)(F)C(F)(F)C(F)(F)F)[C@@](F)(OC(F)(F)C(F)(F)C(F)(F)F)C(F)(F)OC(F)(F)C(F)(F)C(F)(F)F | -10.01 | 62.96 | 2.66 | P | OUT |
| QL03243 | 3,3,4,4-Tetrafluoro-4-(heptafluoropropoxy)but-1-ene                                                    | 1152098-94-6 | FC(F)(F)C(F)(F)C(F)(F)OC(F)(F)C(F)(F)C=C                                                                                       | -7.94  | 50.00 | 2.09 | P | IN  |
| QL03244 | 1,1,2,3,4,4-Hexafluoro-1,2,3,4-tetrakis(heptafluoropropoxy)butane                                      | 54208-66-1   | FC(F)(F)C(F)(F)C(F)(F)OC(F)(F)C(F)(F)C(F)(F)C(F)(F)OC(F)(F)C(F)(F)C(F)(F)C(F)(F)C(F)(F)F                                       | -10.01 | 62.96 | 2.66 | P | OUT |
| QL03245 | 1,1,1,2,2,3,3-Heptafluoro-3-(1,2,2,2-tetrafluoro-1-iodoethoxy)propane                                  | 107432-46-2  | FC(F)(F)C(F)(F)C(F)(F)OC(F)(I)C(F)(F)F                                                                                         | -8.53  | 66.67 | 1.89 | P | OUT |
| QL03246 | 1,1,2,2,3,3,3-heptafluoro-1-(vinyloxy)propane                                                          | 6996-01-6    | FC(F)(F)C(F)(F)C(F)(F)OC=C                                                                                                     | -7.03  | 43.75 | 1.85 | P | IN  |
| QL03247 | Perfluoro-1-ethyl-3-propoxycyclohexane                                                                 | 400626-82-6  | FC(F)(F)C(F)(F)C(F)(F)OC1(F)C(F)(F)C(F)(F)C(F)(F)C(F)(F)C1(F)F                                                                 | -9.55  | 64.71 | 2.41 | P | IN  |
| QL03248 | Perfluoro(1,3-dipropoxycyclohexane)                                                                    | 400626-83-7  | FC(F)(F)C(F)(F)C(F)(F)OC1(F)C(F)(F)C(F)(F)C(F)(F)C(F)(F)OC(F)(F)C(F)(F)C1(F)F                                                  | -10.06 | 63.16 | 2.68 | P | OUT |
| QL03249 | 2-Iodoperfluorobutane                                                                                  | 375-51-9     | FC(F)(F)C(F)(F)C(F)(F)I                                                                                                        | -7.84  | 71.43 | 1.45 | P | OUT |
| QL03250 | 1,1,1,2,2,5,5,6,6,7,7,8,8,9,10,10-Octadecafluorodec-3-ene                                              | 86563-87-3   | FC(F)(F)C(F)(F)C=CC(F)(F)C(F)(F)C(F)(F)C(F)(F)C(F)(F)C(F)(F)F                                                                  | -9.48  | 60.00 | 2.50 | P | IN  |
| QL03251 | 1,1,1,2,2,5,5,6,6,7,7,8,8,9,9-Hexadecafluoronon-3-ene                                                  | 935477-04-6  | FC(F)(F)C(F)(F)C=CC(F)(F)C(F)(F)C(F)(F)C(F)(F)C(F)(F)F                                                                         | -9.30  | 59.26 | 2.44 | P | IN  |
| QL03252 | 1,1,1,2,2,5,5,6,6,7,7,8,8-Tetradecafluorooct-3-ene                                                     | 84808-65-1   | FC(F)(F)C(F)(F)C=CC(F)(F)C(F)(F)C(F)(F)C(F)(F)F                                                                                | -8.77  | 58.33 | 2.23 | P | IN  |
| QL03253 | 1,1,1,2,2,5,5,6,6,7,7,7-Dodecafluorohept-3-ene                                                         | 887111-61-7  | FC(F)(F)C(F)(F)C=CC(F)(F)C(F)(F)C(F)(F)F                                                                                       | -8.38  | 57.14 | 2.09 | P | IN  |
| QL03254 | Perfluoro-5-(pentafluoroethyl)oxolane                                                                  | NOCAS_870516 | FC(F)(F)C(F)(F)C1(F)OC(F)(F)C(F)(F)C1(F)F                                                                                      | -8.02  | 63.16 | 1.76 | P | IN  |
| QL03255 | 2-(1,1,1,2,3,3,3-Heptafluoropropan-2-yl)-2-(pentafluoroethyl)-3,3-bis(trifluoromethyl)oxirane          | 103697-21-8  | FC(F)(F)C(F)(F)C1(OC1(C(F)(F)F)C(F)(F)C(F)(F)C(F)(F)F                                                                          | -7.67  | 64.29 | 1.57 | P | OUT |

|         |                                                                                             |             |                                                                                                                                      |        |       |      |   |     |
|---------|---------------------------------------------------------------------------------------------|-------------|--------------------------------------------------------------------------------------------------------------------------------------|--------|-------|------|---|-----|
| QL03256 | 2,4,6-Tris(pentafluoroethyl)-1,3,5-triazine                                                 | 858-46-8    | FC(F)(F)C(F)(F)C1=NC(=NC(=N1)C(F)(F)C(F)(F)C(F)(F)C(F)(F)F                                                                           | -7.84  | 55.56 | 1.89 | P | IN  |
| QL03257 | 1,1,1,2,2,3,3,4,4,5,5,6,6,7,7,8,8,11,11,12,12,12-Docosafuoro-9-iodododecane                 | 641617-25-6 | FC(F)(F)C(F)(F)CC(I)C(F)(F)C(F)(F)C(F)(F)C(F)(F)C(F)(F)C(F)(F)C(F)(F)F                                                               | -10.03 | 60.53 | 2.74 | P | OUT |
| QL03258 | 1,1,1,2,2,3,3,4,4,7,7,8,8,8-Tetradecafluoro-5-iodooctane                                    | 935553-89-2 | FC(F)(F)C(F)(F)CC(I)C(F)(F)C(F)(F)C(F)(F)F                                                                                           | -8.74  | 57.69 | 2.24 | P | IN  |
| QL03259 | Bis(3-(perfluoroethyl)-1-(9-bromononyl)propyl) thioether                                    | 148757-89-5 | FC(F)(F)C(F)(F)CCCC(CCCCCCBr)SC(CCCCCCBr)CCC(F)(F)C(F)(F)F                                                                           | -8.41  | 13.79 | 3.31 | P | OUT |
| QL03260 | Tetradecafluorooctane                                                                       | 343627-66-7 | FC(F)(F)C(F)(F)CCC(F)(F)C(F)(F)C(F)(F)C(F)(F)F                                                                                       | -8.49  | 53.85 | 2.23 | P | IN  |
| QL03261 | 22 Fluorotelomer iodide                                                                     | 40723-80-6  | FC(F)(F)C(F)(F)CCI                                                                                                                   | -6.24  | 42.86 | 1.52 | P | IN  |
| QL03262 | Thiols, C4-10, .gamma.-.omega.-perfluoro- (Perfluoroalkyl (C2-C8)ethyl mercaptan)           | 68140-18-1  | FC(F)(F)C(F)(F)CCS                                                                                                                   | -5.65  | 33.33 | 1.52 | P | IN  |
| QL03263 | (Perfluoroethyl)methyl iodide                                                               | 354-69-8    | FC(F)(F)C(F)(F)CI                                                                                                                    | -6.67  | 54.55 | 1.39 | P | IN  |
| QL03264 | 1H,1H-Perfluoropropyl acrylate                                                              | 356-86-5    | FC(F)(F)C(F)(F)COC(=O)C=C                                                                                                            | -6.11  | 27.78 | 1.88 | P | OUT |
| QL03265 | 2,2,3,3,3-Pentafluoropropyl nonafluorobutane-1-sulfonate                                    | 893556-35-9 | FC(F)(F)C(F)(F)COS(=O)(=O)C(F)(F)C(F)(F)C(F)(F)F                                                                                     | -8.84  | 51.85 | 2.44 | P | IN  |
| QL03266 | Perfluoroethane                                                                             | 76-16-4     | FC(F)(F)C(F)(F)F                                                                                                                     | -6.65  | 75.00 | 0.81 | P | OUT |
| QL03267 | Pentafluoroiodoethane                                                                       | 354-64-3    | FC(F)(F)C(F)(F)I                                                                                                                     | -6.65  | 75.00 | 0.81 | P | OUT |
| QL03268 | Perfluorotriethylamine                                                                      | 359-70-6    | FC(F)(F)C(F)(F)N(C(F)(F)C(F)(F)C(F)(F)C(F)(F)F                                                                                       | -8.09  | 68.18 | 1.65 | P | OUT |
| QL03269 | Morpholine, 2,2,3,3,5,5,6,6-octafluoro-4-(pentafluoroethyl)-                                | 55716-11-5  | FC(F)(F)C(F)(F)N1C(F)(F)C(F)(F)OC(F)(F)C1(F)F                                                                                        | -7.73  | 61.90 | 1.66 | P | IN  |
| QL03270 | 1,1,1,2,2,3,3,4,5,5,5-Undecafluoro-4-(pentafluoroethoxy)pentane                             | 92978-07-9  | FC(F)(F)C(F)(F)OC(F)(F)C(F)(F)C(F)(F)C(F)(F)C(F)(F)F                                                                                 | -9.08  | 66.67 | 2.14 | P | IN  |
| QL03271 | Hexane, 1,1,2,2,3,3,4,4,5,5,6,6-tridecafluoro-1-(pentafluoroethoxy)-                        | 133080-89-4 | FC(F)(F)C(F)(F)OC(F)(F)C(F)(F)C(F)(F)C(F)(F)C(F)(F)F                                                                                 | -9.75  | 66.67 | 2.44 | P | IN  |
| QL03272 | POLYFLGSID_880513                                                                           | 60164-51-4  | FC(F)(F)C(F)(F)OC(F)(F)C(F)(F)C(F)(F)F                                                                                               | -8.53  | 66.67 | 1.89 | P | OUT |
| QL03273 | alpha-Perfluoropropyl omega-perfluoroethyl                                                  |             | FC(F)(F)C(F)(F)OC(F)(F)C(F)(F)C(F)(F)OC(F)(F)C(F)(F)C(F)(F)F                                                                         | -9.74  | 64.29 | 2.50 | P | IN  |
| QL03274 | poly(perfluoropropylene oxide)                                                              | 52700-35-3  | lp:0:3,2:3,3:3,5:3,6:3,7:2,9:3,10:3,12:3,13:3,15:3,16:3,17:2,19:3,20:3,22:3,23:3,25:3,26:3,27:3,Sg:n:10,9,13,12,16,15,8,11,14,17::ht | -8.12  | 66.67 | 1.71 | P | OUT |
| QL03275 | Perfluoroethyl ether multiple ether-substituted Perfluoroalkyl (linear) sulfonic acids, n=8 | 358-21-4    | FC(F)(F)C(F)(F)OC(F)(F)C(F)(F)OC(F)(F)C(F)(F)C(F)(F)C(F)(F)C(F)(F)C(F)(F)C(F)(F)S(=O)(O)=O                                           | -10.53 | 56.82 | 3.06 | P | OUT |
| QL03276 | multiple ether-substituted Perfluoroalkyl (linear) sulfonic acids, n=7                      |             | FC(F)(F)C(F)(F)OC(F)(F)C(F)(F)OC(F)(F)C(F)(F)C(F)(F)C(F)(F)C(F)(F)C(F)(F)S(=O)(O)=O                                                  | -10.19 | 56.10 | 2.93 | P | OUT |
| QL03277 | multiple ether-substituted Perfluoroalkyl (linear) sulfonic acids, n=6                      |             | FC(F)(F)C(F)(F)OC(F)(F)C(F)(F)OC(F)(F)C(F)(F)C(F)(F)C(F)(F)C(F)(F)S(=O)(O)=O                                                         | -10.03 | 55.26 | 2.88 | P | OUT |
| QL03278 | multiple ether-substituted Perfluoroalkyl (linear) sulfonic acids, n=5                      |             | FC(F)(F)C(F)(F)OC(F)(F)C(F)(F)OC(F)(F)C(F)(F)C(F)(F)C(F)(F)S(=O)(O)=O                                                                | -9.64  | 54.29 | 2.73 | P | IN  |
| QL03279 | multiple ether-substituted Perfluoroalkyl (linear) sulfonic acids, n=4                      |             | FC(F)(F)C(F)(F)OC(F)(F)C(F)(F)OC(F)(F)C(F)(F)C(F)(F)S(=O)(O)=O                                                                       | -9.34  | 53.13 | 2.63 | P | IN  |
| QL03280 | multiple ether-substituted Perfluoroalkyl (linear) sulfonic acids, n=3                      |             | FC(F)(F)C(F)(F)OC(F)(F)C(F)(F)OC(F)(F)C(F)(F)S(=O)(O)=O                                                                              | -8.97  | 51.72 | 2.50 | P | IN  |
| QL03281 | multiple ether-substituted Perfluoroalkyl (linear) sulfonic acids, n=2                      |             | FC(F)(F)C(F)(F)OC(F)(F)C(F)(F)OC(F)(F)S(=O)(O)=O                                                                                     | -8.73  | 50.00 | 2.44 | P | IN  |
| QL03282 | 1,1,2,2-Tetrafluoro-2-(pentafluoroethoxy)ethane-1-sulfonyl fluoride                         | 67990-78-7  | FC(F)(F)C(F)(F)OC(F)(F)C(F)(F)S(F)(=O)=O                                                                                             | -7.84  | 55.56 | 1.89 | P | IN  |

|         |                                                                                                                                                |              |                                                                                   |        |       |      |   |     |
|---------|------------------------------------------------------------------------------------------------------------------------------------------------|--------------|-----------------------------------------------------------------------------------|--------|-------|------|---|-----|
| QL03283 | 2-(2-Bromo-1,1,2,2-tetrafluoroethoxy)-1,1,1,2,3,3-hexafluoro-3-(pentafluoroethoxy)propane                                                      | 1482416-44-3 | FC(F)(F)C(F)(F)OC(F)(F)C(F)(OC(F)(F)C(F)(F)Br)C(F)(F)F                            | -9.14  | 64.00 | 2.24 | P | IN  |
| QL03284 | 1,1,1,2,3,3-Hexafluoro-2,3-bis(pentafluoroethoxy)propane                                                                                       | 95842-03-8   | FC(F)(F)C(F)(F)OC(F)(F)C(F)(OC(F)(F)C(F)(F)C(F)(F)F                               | -9.14  | 64.00 | 2.24 | P | IN  |
| QL03285 | 1,1,2,2-Tetrafluoro-2-[[1,1,1,2,3,3-hexafluoro-3-(pentafluoroethoxy)propan-2-yl]oxy]ethane-1-sulfonyl fluoride                                 | 27744-59-8   | FC(F)(F)C(F)(F)OC(F)(F)C(F)(OC(F)(F)C(F)(F)S(F)(=O)=O)C(F)(F)F                    | -9.13  | 57.14 | 2.43 | P | IN  |
| QL03286 | 1-Bromo-1,1,2,2,4,5,5,7,8,8,10,11,11,13,13,14,14,14-octadecafluoro-4,7,10-tris(trifluoromethyl)-3,6,9,12-tetraoxatetradecane                   | 1482416-51-2 | FC(F)(F)C(F)(F)OC(F)(F)C(F)(OC(F)(F)C(F)(OC(F)(F)C(F)(F)Br)C(F)(F)C(F)(F)C(F)(F)F | -10.54 | 62.22 | 2.92 | P | OUT |
| QL03287 | 1-Bromo-1,1,2,2,4,5,5,7,8,8,10,11,11,13,14,14,16,16,17,17,17-henicosafuoro-4,7,10,13-tetrakis(trifluoromethyl)-3,6,9,12,15-pentaaxaheptadecane | 1482416-52-3 | FC(F)(F)C(F)(F)OC(F)(F)C(F)(OC(F)(F)C(F)(OC(F)(F)C(F)(F)Br)C(F)(F)C(F)(F)C(F)(F)F | -11.04 | 61.82 | 3.16 | P | OUT |
| QL03288 | 1,2-Dichloro(perfluoro-1-(ethoxymethoxy)ethane)                                                                                                | 369371-42-6  | FC(F)(F)C(F)(F)OC(F)(F)OC(F)(Cl)C(F)(F)Cl                                         | -8.75  | 63.16 | 2.09 | P | IN  |
| QL03289 | 2,2,3,5,6-Pentafluoro-5-(pentafluoroethoxy)-3,6-bis(trifluoromethyl)-1,4-dioxane                                                               | 84041-66-7   | FC(F)(F)C(F)(F)OC1(F)OC(F)(C(F)(F)C(F)(F)OC1(F)C(F)(F)F                           | -8.50  | 59.26 | 2.08 | P | IN  |
| QL03290 | Pentafluoroethane-1-sulfonyl chloride                                                                                                          | 64773-40-6   | FC(F)(F)C(F)(F)S(Cl)(=O)=O                                                        | -6.52  | 54.55 | 1.32 | P | IN  |
| QL03291 | Heptafluoro-2-iodopropane                                                                                                                      | 677-69-0     | FC(F)(F)C(F)(I)C(F)(F)F                                                           | -7.64  | 72.73 | 1.32 | P | OUT |
| QL03292 | 1,1,1,2,3,3,3-Heptafluoro-2-(1,1,2,3,3,3-hexafluoro-2-iodopropoxy)propane                                                                      | 16005-45-1   | FC(F)(F)C(F)(I)C(F)(F)OC(F)(C(F)(F)C(F)(F)F                                       | -8.37  | 66.67 | 1.82 | P | OUT |
| QL03293 | Morpholine, 2,2,3,3,5,5,6,6-octafluoro-4-[[1,2,2,2-tetrafluoro-1-(trifluoromethyl)ethyl]-                                                      | 1600-71-1    | FC(F)(F)C(F)(N1C(F)(F)C(F)(F)OC(F)(F)C1(F)F)C(F)(F)F                              | -7.65  | 62.50 | 1.61 | P | IN  |
| QL03294 | Heptafluoroisopropyl acrylate                                                                                                                  | 13057-08-4   | FC(F)(F)C(F)(OC(=O)C=C)C(F)(F)F                                                   | -6.37  | 38.89 | 1.69 | P | IN  |
| QL03295 | 1,1,1,2,3,3,3-Heptafluoropropan-2-yl benzoate                                                                                                  | 57024-21-2   | FC(F)(F)C(F)(OC(=O)c1ccccc1)C(F)(F)F                                              | -6.68  | 29.17 | 2.10 | P | IN  |
| QL03296 | 2-(1,2-Dichloro-1,2,2-trifluoroethoxy)-1,1,1,2,3,3,3-heptafluoropropane                                                                        | 85720-81-6   | FC(F)(F)C(F)(OC(F)(Cl)C(F)(F)Cl)C(F)(F)F                                          | -7.91  | 66.67 | 1.61 | P | OUT |
| QL03297 | 2-(2-Chloro-1,1,2-trifluoro-2-iodoethoxy)-1,1,1,2,3,3,3-heptafluoropropane                                                                     | 16031-04-2   | FC(F)(F)C(F)(OC(F)(F)C(F)(Cl))C(F)(F)F                                            | -7.91  | 66.67 | 1.61 | P | OUT |
| QL03298 | 2-(2-Bromo-1,1,2,2-tetrafluoroethoxy)-1,1,1,2,3,3,3-heptafluoropropane                                                                         | 16005-49-5   | FC(F)(F)C(F)(OC(F)(F)C(F)(F)Br)C(F)(F)F                                           | -7.91  | 66.67 | 1.61 | P | OUT |
| QL03299 | 1,1,2,2,3,3,4,4,5,5,6,6,7,7,8,8-Hexadecafluoro-1-[(1,1,1,2,3,3,3-heptafluoropropan-2-yl)oxy]-8-iodooctane                                      | 25080-19-7   | FC(F)(F)C(F)(OC(F)(F)C(F)(F)C(F)(F)C(F)(F)C(F)(F)C(F)(F)C(F)(F)I)C(F)(F)F         | -10.19 | 66.67 | 2.64 | P | OUT |
| QL03300 | 1,1,2,2,3,3,4,4,5,5,6,6-Dodecafluoro-1-[(1,1,1,2,3,3,3-heptafluoropropan-2-yl)oxy]-8-iodooctane                                                | 25080-25-5   | FC(F)(F)C(F)(OC(F)(F)C(F)(F)C(F)(F)C(F)(F)C(F)(F)C(F)(F)C(F)(F)C(F)(F)I)C(F)(F)F  | -9.57  | 55.56 | 2.67 | P | IN  |
| QL03301 | 1-Iodo-6-(heptafluoroisopropoxy)perfluoro hexane                                                                                               | 25080-18-6   | FC(F)(F)C(F)(OC(F)(F)C(F)(F)C(F)(F)C(F)(F)C(F)(F)I)C(F)(F)F                       | -9.64  | 66.67 | 2.39 | P | IN  |

|         |                                                                                          |             |                                                                                                         |       |       |      |   |     |
|---------|------------------------------------------------------------------------------------------|-------------|---------------------------------------------------------------------------------------------------------|-------|-------|------|---|-----|
| QL03302 | 1,1,2,2,3,3,4,4-Octafluoro-1-[(1,1,1,2,3,3,3-heptafluoropropan-2-yl)oxy]-6-iodohexane    | 25080-24-4  | FC(F)(F)C(F)(OC(F)(F)C(F)(F)C(F)(F)C(F)(F)CCI)C(F)(F)F                                                  | -8.89 | 53.33 | 2.43 | P | IN  |
| QL03303 | 1,1,2,2,3,3,4,4-Octafluoro-1-[(1,1,1,2,3,3,3-heptafluoropropan-2-yl)oxy]-4-iodobutane    | 25080-17-5  | FC(F)(F)C(F)(OC(F)(F)C(F)(F)C(F)(F)C(F)(F))C(F)(F)F                                                     | -8.96 | 66.67 | 2.08 | P | IN  |
| QL03304 | 1,1,2,2,3,3,4,4-Octafluoro-1,4-bis[(1,1,1,2,3,3,3-heptafluoropropan-2-yl)oxy]butane      | 23228-90-2  | FC(F)(F)C(F)(OC(F)(F)C(F)(F)C(F)(F)C(F)(F)OC(F)(C(F)(F)F)C(F)(F)F)C(F)(F)F                              | -9.40 | 64.71 | 2.34 | P | IN  |
| QL03305 | 1-[2,3,3,3-Tetrafluoro-2-(heptafluoropropoxy)-1-(piperidin-1-yl)propyl]-1H-benzotriazole | 133384-08-4 | FC(F)(F)C(F)(OC(F)(F)C(F)(F)C(F)(F)C(N1CCCCC1)n1nnc2ccccc12                                             | -7.10 | 22.92 | 2.47 | P | OUT |
| QL03306 | 1,1,1,2,3,3,3-Heptafluoro-2-(1,1,2,2-tetrafluoro-2-iodoethoxy)propane                    | 16005-38-2  | FC(F)(F)C(F)(OC(F)(F)C(F)(F))C(F)(F)F                                                                   | -7.91 | 66.67 | 1.61 | P | OUT |
| QL03307 | Bis(perfluoro(1-[(3,6-dimethyl-1,4-dioxan-2-yl)oxy]ethyl)) ketone                        | 61097-96-9  | FC(F)(F)C(F)(OC1(F)OC(F)(C(F)(F)C(F)(F)OC1(F)C(F)(F)C(=O)C(F)(OC1(F)OC(F)(C(F)(F)C(F)(F)OC1(F)C(F)(F)F) | -9.84 | 55.56 | 2.79 | P | IN  |
| QL03308 | Perfluoro-2,3-bis(2,5-dimethyl-1,4-dioxan-3-oxy)butane                                   | 61097-98-1  | FC(F)(F)C(F)(OC1(F)OC(F)(C(F)(F)C(F)(F)OC1(F)C(F)(F)C(F)(OC1(F)OC(F)(C(F)(F)C(F)(F)OC1(F)C(F)(F)F)      | -9.72 | 57.69 | 2.68 | P | IN  |
| QL03309 | 2-[(1,1,1,2,3,3,3-Heptafluoropropan-2-yl)oxy]-N-phenylacetamide                          | 62656-67-1  | FC(F)(F)C(F)(OCC(=O)NC1=CC=CC=C1)C(F)(F)F                                                               | -6.94 | 24.14 | 2.36 | P | OUT |
| QL03310 | Allyl perfluoroisopropyl ether                                                           | 15242-17-8  | FC(F)(F)C(F)(OCC=C)C(F)(F)F                                                                             | -6.24 | 36.84 | 1.69 | P | IN  |
| QL03311 | Trichloro[3-[1,2,2,2-tetrafluoro-1-(trifluoromethyl)ethoxy]propyl]silane                 | 15538-93-9  | FC(F)(F)C(F)(OCCC[Si](Cl)(Cl)Cl)C(F)(F)F                                                                | -7.05 | 41.67 | 1.92 | P | IN  |
| QL03312 | Dichloromethyl[3-[1,2,2,2-tetrafluoro-1-(trifluoromethyl)ethoxy]propyl]silane            | 20006-68-2  | FC(F)(F)C(F)(OCCC[SiH2]C(Cl)Cl)C(F)(F)F                                                                 | -6.84 | 33.33 | 2.06 | P | IN  |
| QL03313 | 1-Bromo-4-[(1,1,1,2,3,3,3-heptafluoropropan-2-yl)oxy]butane                              | 37027-49-9  | FC(F)(F)C(F)(OCCCCBr)C(F)(F)F                                                                           | -6.76 | 33.33 | 2.02 | P | IN  |
| QL03314 | 1,1,1,2,3,3,5,5,7,7,7-Undecafluoro-6-iodo-2,4-bis(trifluoromethyl)heptane                | 922524-01-4 | FC(F)(F)C(I)C(F)(F)C(C(F)(F)F)C(F)(F)C(F)(C(F)(F)F)C(F)(F)F                                             | -8.57 | 62.07 | 2.04 | P | IN  |
| QL03315 | 1,1,1,2,3,3,5,5,5-Nonafluoro-4-iodo-2-(trifluoromethyl)pentane                           | 922524-00-3 | FC(F)(F)C(I)C(F)(F)C(F)(C(F)(F)F)C(F)(F)F                                                               | -8.04 | 65.00 | 1.71 | P | OUT |
| QL03316 | 1,1,1,2,2,3,3,4,4,5,5,6,6,7,7,9,9,9-Octadecafluoro-8-iodononane                          | 922524-04-7 | FC(F)(F)C(I)C(F)(F)C(F)(C(F)(F)C(F)(F)C(F)(F)C(F)(F)C(F)(F)C(F)(F)F                                     | -9.69 | 65.52 | 2.45 | P | IN  |
| QL03317 | 1,1,1,2,7,7,7-Heptafluoro-6-iodo-2,4-bis(trifluoromethyl)heptane                         | 922523-99-7 | FC(F)(F)C(I)CC(CC(F)(C(F)(F)F)C(F)(F)F)C(F)(F)F                                                         | -7.79 | 48.28 | 2.07 | P | IN  |
| QL03318 | 1,1,1,2,5,5,5-Heptafluoro-4-iodo-2-(trifluoromethyl)pentane                              | 922523-98-6 | FC(F)(F)C(I)CC(F)(C(F)(F)F)C(F)(F)F                                                                     | -7.18 | 55.00 | 1.61 | P | IN  |
| QL03319 | 1,1,1,2,2,3,3,4,4,5,5,6,6,9,9,9-Hexadecafluoro-8-iodononane                              | 922524-02-5 | FC(F)(F)C(I)CC(F)(F)C(F)(F)C(F)(F)C(F)(F)C(F)(F)F                                                       | -9.26 | 58.62 | 2.45 | P | IN  |
| QL03320 | 1,1,1,2,2,3,3,4,4,7,7,7-Dodecafluoro-6-iodoheptane                                       | 93553-88-1  | FC(F)(F)C(I)CC(F)(F)C(F)(F)C(F)(F)F                                                                     | -8.51 | 56.52 | 2.17 | P | IN  |
| QL03321 | 1,1,1,3,3,3-Hexafluoropropan-2-yl heptafluorobutanoate                                   | 922168-41-0 | FC(F)(F)C(OC(=O)C(F)(F)C(F)(F)C(F)(F)F                                                                  | -8.27 | 56.52 | 2.06 | P | IN  |
| QL03322 | Hexafluoroisopropyl acrylate                                                             | 2160-89-6   | FC(F)(F)C(OC(=O)C=C)C(F)(F)F                                                                            | -6.02 | 33.33 | 1.69 | P | IN  |
| QL03323 | 1,1,1,3,3,3-Hexafluoropropan-2-yl nonafluorobutane-1-sulfonate                           | 118334-96-6 | FC(F)(F)C(OS(=O)(=O)C(F)(F)C(F)(F)C(F)(F)F)C(F)(F)F                                                     | -8.48 | 55.56 | 2.18 | P | IN  |

|         |                                                                                                     |             |                                                                                         |       |       |      |   |     |
|---------|-----------------------------------------------------------------------------------------------------|-------------|-----------------------------------------------------------------------------------------|-------|-------|------|---|-----|
| QL03324 | H-substituted perfluoroalkyl<br>(linear) sulfonic acids_ii, n=0                                     |             | FC(F)(F)C(S(=O)(O)=O)(F)[H]                                                             | -5.15 | 33.33 | 1.30 | P | IN  |
| QL03325 | 1,1,1,4,4,5,5,6,6,7,7,8,8,9,9-<br>Hexadecafluoronon-2-ene                                           | 935477-01-3 | FC(F)(F)C=CC(F)(F)C(F)(F)C(F)(F)C(F)(F)C(F)(F)F                                         | -9.30 | 59.26 | 2.44 | P | IN  |
| QL03326 | 1,1,1,4,4,5,5,6,6,7,7,8,8,8-<br>Tetradecafluorooct-2-ene                                            | 935476-95-2 | FC(F)(F)C=CC(F)(F)C(F)(F)C(F)(F)C(F)(F)C(F)(F)F                                         | -8.77 | 58.33 | 2.23 | P | IN  |
| QL03327 | 1,1,1,4,4,5,5,6,6,7,7-<br>Dodecafluorohept-2-ene                                                    | 887111-62-8 | FC(F)(F)C=CC(F)(F)C(F)(F)C(F)(F)C(F)(F)F                                                | -8.56 | 57.14 | 2.17 | P | IN  |
| QL03328 | (2E)-1,1,1,4,4,5,5,6,6,6-<br>Decafluorohex-2-ene                                                    | 83227-62-7  | FC(F)(F)C=CC(F)(F)C(F)(F)C(F)(F)F                                                       | -7.88 | 55.56 | 1.91 | P | IN  |
| QL03329 | Cyclohexane,<br>decafluorobis(trifluoromethyl)-<br>(6Cl,7Cl,8Cl,9Cl)                                | 26637-68-3  | FC(F)(F)C1(C(F)(F)F)C(F)(F)C(F)(F)C(F)(F)C1(F)F                                         | -7.70 | 66.67 | 1.52 | P | OUT |
| QL03330 | Perfluorodimethylcyclobutane                                                                        | 28677-00-1  | FC(F)(F)C1(C(F)(F)F)C(F)(F)C(F)(F)C1(F)F                                                | -7.62 | 66.67 | 1.48 | P | OUT |
| QL03331 | Perfluoro-1,3,5-<br>trimethylcyclohexane                                                            | 374-76-5    | FC(F)(F)C1(F)C(F)(F)C(F)(F)C(F)(F)C(F)(F)C1(F)F                                         | -7.33 | 66.67 | 1.35 | P | OUT |
| QL03332 | Cyclobutane, 1,1,2,3,3,4-<br>hexafluoro-2,4-<br>bis(trifluoromethyl)-                               | 13221-71-1  | FC(F)(F)C1(F)C(F)(F)C(F)(F)C(F)(F)C1(F)F                                                | -8.53 | 66.67 | 1.89 | P | OUT |
| QL03333 | 1,1,2,2,3,4,4,5,5,6-Decafluoro-3,6-<br>bis(trifluoromethyl)cyclohexane                              | 374-77-6    | FC(F)(F)C1(F)C(F)(F)C(F)(F)C(F)(F)C(F)(F)C1(F)F                                         | -8.52 | 66.67 | 1.89 | P | OUT |
| QL03334 | Perfluoro-1,3-<br>dimethylcyclohexane                                                               | 335-27-3    | FC(F)(F)C1(F)C(F)(F)C(F)(F)C(F)(F)C(F)(F)C1(F)F                                         | -7.63 | 66.67 | 1.48 | P | OUT |
| QL03335 | Perfluoro-5,5'-bis(trifluoromethyl)-<br>1,1'-bicyclohexyl                                           | 105462-77-9 | FC(F)(F)C1(F)C(F)(F)C(F)(F)C(F)(F)C1(F)F)C1(F)C(F)(F)C(F)(F)C(F)(F)C(F)(F)C(F)(F)C1(F)F | -9.00 | 65.00 | 2.15 | P | IN  |
| QL03336 | Perfluoro-1,2-<br>dimethylcyclohexane                                                               | 306-98-9    | FC(F)(F)C1(F)C(F)(F)C(F)(F)C(F)(F)C1(F)C(F)(F)F                                         | -7.63 | 66.67 | 1.48 | P | OUT |
| QL03337 | Perfluoromethylcyclohexane                                                                          | 355-02-2    | FC(F)(F)C1(F)C(F)(F)C(F)(F)C(F)(F)C1(F)F                                                | -7.61 | 66.67 | 1.47 | P | OUT |
| QL03338 | Cyclohexanesulfonyl fluoride,<br>decafluoro(trifluoromethyl)-                                       | 68318-34-3  | FC(F)(F)C1(F)C(F)(F)C(F)(F)C(F)(F)C1(F)S(F)(=O)=O                                       | -7.11 | 58.33 | 1.48 | P | IN  |
| QL03339 | Perfluoromethylcyclopentane                                                                         | 1805-22-7   | FC(F)(F)C1(F)C(F)(F)C(F)(F)C(F)(F)C1(F)F                                                | -7.62 | 66.67 | 1.48 | P | OUT |
| QL03340 | Perfluoromethyldecalin                                                                              | 51294-16-7  | FC(F)(F)C1(F)C(F)(F)C(F)(F)C2(F)C(F)(F)C(F)(F)C(F)(F)C12F                               | -8.14 | 64.52 | 1.77 | P | IN  |
| QL03341 | Perfluoro-1,2-<br>dimethylcyclobutane                                                               | 2994-71-0   | FC(F)(F)C1(F)C(F)(F)C(F)(F)C1(F)C(F)(F)F                                                | -7.33 | 66.67 | 1.35 | P | OUT |
| QL03342 | Perfluoro-2-methyldecalin                                                                           | 306-95-6    | FC(F)(F)C1(F)C(F)(F)C(F)(F)C2(F)C(F)(F)C(F)(F)C(F)(F)C2(F)C1(F)F                        | -8.77 | 64.52 | 2.06 | P | IN  |
| QL03343 | Perfluoro-3,6-dimethyl-1,4-dioxan-<br>2-one                                                         | 7309-84-4   | FC(F)(F)C1(F)OC(F)(F)C(F)(OC1=O)C(F)(F)F                                                | -7.86 | 52.63 | 1.98 | P | IN  |
| QL03344 | Perfluoromethyloxirane                                                                              | 428-59-1    | FC(F)(F)C1(F)OC1(F)F                                                                    | -6.94 | 60.00 | 1.36 | P | IN  |
| QL03345 | Perfluoroalkyl N-heterocycles,<br>m+n+p=6                                                           |             | FC(F)(F)C1=C(OC(F)(F)F)N=C(C(F)(C(F)(F)F)C(F)(F)C(F)(F)F)[N-]1                          | -8.46 | 55.56 | 2.17 | P | IN  |
| QL03346 | 2,2,3,3,4,4,5,5,6,6,7,7,8,8,9,9-<br>Heptadecafluoro-N-[3-<br>(trifluoromethyl)phenyl]nonanami<br>de | 325989-96-6 | FC(F)(F)c1cccc(NC(=O)C(F)(F)C(F)(F)C(F)(F)C(F)(F)C(F)(F)C(F)(F)C(F)(F)F)c1              | -9.63 | 46.51 | 2.95 | P | IN  |
| QL03347 | 2,2,3,3,4,4,4-Heptafluoro-N-[3-<br>(trifluoromethyl)phenyl]butanami<br>de                           | 2059-15-6   | FC(F)(F)c1cccc(NC(=O)C(F)(F)C(F)(F)C(F)(F)F)c1                                          | -7.76 | 35.71 | 2.40 | P | IN  |
| QL03348 | Dichlorobis(1,1,2,2,3,3,6,6-<br>nonafluorohexyl)silane                                              | 156323-66-9 | FC(F)(F)CCC(F)(F)C(F)(F)C(F)(F)[Si](Cl)(Cl)C(F)(F)C(F)(F)C(F)(F)CCC(F)(F)F              | -9.45 | 48.78 | 2.80 | P | IN  |
| QL03349 | Trichloro(1,1,2,2,3,3,6,6-<br>nonafluorohexyl)silane                                                | 78560-47-1  | FC(F)(F)CCC(F)(F)C(F)(F)C(F)(F)[Si](Cl)(Cl)Cl                                           | -8.25 | 52.17 | 2.17 | P | IN  |
| QL03350 | 1-Bromo-4-<br>(1,1,2,2,3,3,4,4,5,5,6,6,7,7,10,10,1<br>0-heptafluorodecyl)benzene                    | 195324-88-0 | FC(F)(F)CCC(F)(F)C(F)(F)C(F)(F)C(F)(F)C(F)(F)C(F)(F)C1=CC=C(Br)C=C1                     | -9.27 | 42.86 | 2.88 | P | IN  |
| QL03351 | 1,1,1,2,2,3,3,4,4,7,7-<br>Dodecafluoroheptane                                                       | 503189-11-5 | FC(F)(F)CCC(F)(F)C(F)(F)C(F)(F)C(F)(F)F                                                 | -8.25 | 52.17 | 2.17 | P | IN  |
| QL03352 | 1,1,1,2,2,3,3,6,6,6-<br>Decafluorohexane                                                            | 188189-52-8 | FC(F)(F)CCC(F)(F)C(F)(F)C(F)(F)F                                                        | -7.53 | 50.00 | 1.91 | P | IN  |

[illegible]



|         |                                                                                                                                                     |             |                                                                               |        |       |      |   |     |
|---------|-----------------------------------------------------------------------------------------------------------------------------------------------------|-------------|-------------------------------------------------------------------------------|--------|-------|------|---|-----|
| QL03377 | 1-[bromo(difluoro)methoxy]-1,1,2,2-tetrafluoro-2-(trifluoromethoxy)ethane                                                                           | 87136-78-5  | FC(F)(F)OC(F)(F)C(F)(F)OC(F)(F)Br                                             | -8.10  | 62.50 | 1.81 | P | IN  |
| QL03378 | 2,2-difluoro-2-[1,1,2,2-tetrafluoro-2-(trifluoromethoxy)ethoxy]acetyl Chloride                                                                      | 261503-81-5 | FC(F)(F)OC(F)(F)C(F)(F)OC(F)(F)C(Cl)=O                                        | -8.51  | 55.56 | 2.19 | P | IN  |
| QL03379 | 1-[Bromo(difluoro)methoxy]-1,1,2,2-tetrafluoro-2-[1,1,2,2-tetrafluoro-2-(trifluoromethoxy)ethoxy]ethane                                             | 330562-45-3 | FC(F)(F)OC(F)(F)C(F)(F)OC(F)(F)C(F)(F)OC(F)(F)Br                              | -9.14  | 60.87 | 2.33 | P | IN  |
| QL03380 | 1,1,1,3,3,4,4,6,6,7,7,9,9,10,10,12,12,13,13,15,15,15-Docosafluoro-2,5,8,11,14-pentaoxapentadecane                                                   | 64028-06-4  | FC(F)(F)OC(F)(F)C(F)(F)OC(F)(F)C(F)(F)OC(F)(F)C(F)(F)OC(F)(F)C(F)(F)OC(F)(F)F | -10.44 | 59.46 | 2.95 | P | OUT |
| QL03381 | Perfluoro-2,5,8,11-tetraoxadodecane                                                                                                                 | 64028-04-2  | FC(F)(F)OC(F)(F)C(F)(F)OC(F)(F)C(F)(F)OC(F)(F)C(F)(F)OC(F)(F)F                | -9.78  | 60.00 | 2.64 | P | IN  |
| QL03382 | 3-Ethenyl-1,1,2-trifluoro-2-[1,1,2,2-tetrafluoro-2-[1,1,2,2-tetrafluoro-2-[1,1,2,2-tetrafluoro-2-(trifluoromethoxy)ethoxy]ethoxy]ethoxy]cyclobutane | 709620-35-9 | FC(F)(F)OC(F)(F)C(F)(F)OC(F)(F)C(F)(F)OC(F)(F)C(F)(F)OC1(F)C(CC1(F)F)C=C      | -9.45  | 43.90 | 2.94 | P | IN  |
| QL03383 | 1-[Chloro(difluoro)methoxy]-1,1,2,2-tetrafluoro-2-(trifluoromethoxy)ethane                                                                          | 87136-79-6  | FC(F)(F)OC(F)(F)C(F)(F)OC(F)(F)Cl                                             | -8.10  | 62.50 | 1.81 | P | IN  |
| QL03384 | 1-[Difluoro(iodo)methoxy]-1,1,2,2-tetrafluoro-2-(trifluoromethoxy)ethane                                                                            | 138370-72-6 | FC(F)(F)OC(F)(F)C(F)(F)OC(F)(F)I                                              | -8.10  | 62.50 | 1.81 | P | IN  |
| QL03385 | 1,2-Dichloro(perfluoro-1-[(2-methoxyethoxy)methoxy]ethane)                                                                                          | 369371-43-7 | FC(F)(F)OC(F)(F)C(F)(F)OC(F)(F)OC(F)(Cl)C(F)(F)Cl                             | -9.29  | 60.87 | 2.39 | P | IN  |
| QL03386 | 1,1,1,2,3,3-Hexafluoro-2,3-bis(trifluoromethoxy)propane ether-substituted perfluoroalkyl                                                            | 95842-02-7  | FC(F)(F)OC(F)(F)C(F)(OC(F)(F)F)C(F)(F)F                                       | -8.33  | 63.16 | 1.90 | P | IN  |
| QL03387 | (linear) caborxylic acids, n=0                                                                                                                      |             | FC(F)(F)OC(F)(F)C(O)=O                                                        | -6.11  | 41.67 | 1.49 | P | IN  |
| QL03388 | 1,2-dichloro(perfluoro-1-(methoxymethoxy)ethane)                                                                                                    | 874288-98-9 | FC(F)(F)OC(F)(F)OC(F)(Cl)C(F)(F)Cl                                            | -8.31  | 62.50 | 1.91 | P | IN  |
| QL03389 | multiple ether-substituted perfluoroalkyl (linear) caborxylic acids, n=2                                                                            | 39492-89-2  | FC(F)(F)OC(F)(F)OC(F)(F)C(O)=O                                                | -7.21  | 43.75 | 1.93 | P | IN  |
| QL03390 | multiple ether-substituted perfluoroalkyl (linear) caborxylic acids, n=3                                                                            | 39492-90-5  | FC(F)(F)OC(F)(F)OC(F)(F)OC(F)(F)C(O)=O                                        | -8.03  | 45.00 | 2.27 | P | IN  |
| QL03391 | multiple ether-substituted perfluoroalkyl (linear) caborxylic acids, n=4                                                                            | 39492-91-6  | FC(F)(F)OC(F)(F)OC(F)(F)OC(F)(F)OC(F)(F)C(O)=O                                | -8.69  | 45.83 | 2.54 | P | IN  |
| QL03392 | 1,1,1,2-Tetrafluoro-2-iodo-2-(trifluoromethoxy)ethane                                                                                               | 139604-89-0 | FC(F)(F)OC(F)(I)C(F)(F)F                                                      | -7.57  | 66.67 | 1.46 | P | OUT |
| QL03393 | 1,1,1,5,5,6,6,10,10,10-Decafluoro-3,3,8,8-tetrakis(trifluoromethyl)-2,4,7,9-tetraoxadecane                                                          | 95841-80-8  | FC(F)(F)OC(OC(F)(F)C(F)(F)OC(OC(F)(F)F)C(F)(F)F)C(F)(F)C(F)(F)C(F)(F)F        | -9.06  | 61.11 | 2.29 | P | IN  |
| QL03394 | Tetrakis(trifluoromethoxy)methane                                                                                                                   | 92639-87-7  | FC(F)(F)OC(OC(F)(F)F)(OC(F)(F)F)OC(F)(F)F                                     | -7.26  | 57.14 | 1.58 | P | IN  |
| QL03395 | Undecafluoro(trifluoromethoxy)cyclohexane                                                                                                           | 4943-06-0   | FC(F)(F)OC1(F)C(F)(F)C(F)(F)C(F)(F)C1(F)F                                     | -8.41  | 63.64 | 1.92 | P | IN  |



|         |                                                                                                                                                                  |             |                                                                                                                 |       |       |      |   |     |
|---------|------------------------------------------------------------------------------------------------------------------------------------------------------------------|-------------|-----------------------------------------------------------------------------------------------------------------|-------|-------|------|---|-----|
| QL03428 | 1-chloro-1,1,2,2,3,3-hexafluoro-3-<br>[(trifluorovinyl)oxy]propane<br>1,1,2,2,3,3-Hexafluoro-1-<br>[(trifluoroethenyl)oxy]-3-<br>(trifluoromethoxy)propane       | 80962-91-0  | FC(F)=C(F)OC(F)(F)C(F)(F)C(F)Cl                                                                                 | -8.35 | 62.50 | 1.92 | P | IN  |
| QL03429 | 1,1,2,2,3,3-Hexafluoro-1,3-<br>bis((trifluoroethenyl)oxy)-3-<br>(trifluoromethoxy)propane                                                                        | 40573-09-9  | FC(F)=C(F)OC(F)(F)C(F)(F)C(F)(F)OC(F)(F)F                                                                       | -8.87 | 60.00 | 2.23 | P | IN  |
| QL03430 | 1,1,2,2,3,3-Hexafluoro-1,3-<br>bis((trifluorovinyl)oxy)propane                                                                                                   | 13846-22-5  | FC(F)=C(F)OC(F)(F)C(F)(F)C(F)(F)OC(F)=C(F)F                                                                     | -9.11 | 57.14 | 2.42 | P | IN  |
| QL03431 | 1,1,2,2,3,3-hexafluoro-1-<br>[(trifluorovinyl)oxy]propane                                                                                                        | 84145-18-6  | FC(F)=C(F)OC(F)(F)C(F)(F)C(F)F                                                                                  | -7.98 | 56.25 | 1.93 | P | IN  |
| QL03432 | Trifluoro(1,1,2,2-tetrafluoro-2-<br>iodoethoxy)ethylene<br>1,1'-((1,1,2,2-<br>Tetrafluoroethylene)bis(oxy))bis(1<br>,2,2-trifluoroethylene)                      | 6037-91-8   | FC(F)=C(F)OC(F)(F)C(F)(F)I                                                                                      | -7.92 | 61.54 | 1.76 | P | IN  |
| QL03433 | Perfluoro(3-oxapent-4-<br>ene)sulfonyl fluoride                                                                                                                  | 1998-53-4   | FC(F)=C(F)OC(F)(F)C(F)(F)OC(F)=C(F)F                                                                            | -8.52 | 55.56 | 2.20 | P | IN  |
| QL03434 | Perfluoro(2-propoxypropyl vinyl<br>ether)                                                                                                                        | 29514-94-1  | FC(F)=C(F)OC(F)(F)C(F)(F)S(F)(=O)=O                                                                             | -7.57 | 50.00 | 1.92 | P | IN  |
| QL03435 |                                                                                                                                                                  | 1644-11-7   | FC(F)=C(F)OC(F)(F)C(F)(OC(F)(F)C(F)(F)C(F)(F)F)C(F)(F)F                                                         | -9.42 | 61.54 | 2.44 | P | IN  |
| QL03436 | Perfluoro(3-(1-(ethenyloxy)propan-<br>2-yloxy)propanenitrile)                                                                                                    | 69804-19-9  | FC(F)=C(F)OC(F)(F)C(F)(OC(F)(F)C(F)(F)C#N)C(F)(F)F                                                              | -8.93 | 54.17 | 2.42 | P | IN  |
| QL03437 | Perfluoro(4-methyl-3,6-dioxaoct-7-<br>ene)sulfonyl fluoride                                                                                                      | 16090-14-5  | FC(F)=C(F)OC(F)(F)C(F)(OC(F)(F)C(F)(F)S(F)(=O)=O)C(F)(F)F                                                       | -8.95 | 53.85 | 2.44 | P | IN  |
| QL03438 | 1,1,1,2,2,3,3-Heptafluoro-3-<br>{[1,1,1,2,3,3-hexafluoro-3-<br>{(1,1,1,2,3,3-hexafluoro-3-<br>[(trifluoroethenyl)oxy]propan-2-<br>yl)oxy}propan-2-yl]oxy}propane | 2599-84-0   | FC(F)=C(F)OC(F)(F)C(F)(OC(F)(F)C(F)(OC(F)(F)C(F)(F)C(F)(F)C(F)(F)C(F)(F)F                                       | -9.92 | 61.11 | 2.67 | P | OUT |
| QL03439 | 1,1,2,3,3-pentafluoro-3-<br>[(trifluorovinyl)oxy]propene                                                                                                         | 64080-43-9  | FC(F)=C(F)OC(F)(F)C(F)=C(F)F                                                                                    | -8.07 | 57.14 | 1.95 | P | IN  |
| QL03440 | 1-<br>[Difluoro(pentafluoroethoxy)meth<br>oxy]-1,2,2-trifluoroethene                                                                                             | 346662-93-9 | FC(F)=C(F)OC(F)(F)OC(F)(F)C(F)(F)F                                                                              | -8.58 | 58.82 | 2.13 | P | IN  |
| QL03441 | Perfluoro[(2-<br>methoxyethoxy)methoxy]ethene<br>1-<br>[Difluoro(trifluoromethoxy)metho<br>xy]-1,2,2-trifluoroethene                                             | 369371-47-1 | FC(F)=C(F)OC(F)(F)OC(F)(F)C(F)(F)OC(F)(F)F                                                                      | -9.07 | 57.14 | 2.40 | P | IN  |
| QL03442 | 1,1'-<br>[(difluoromethylene)bis(oxy)]bis[1<br>,2,2-trifluoroethylene]                                                                                           | 700874-87-9 | FC(F)=C(F)OC(F)(F)OC(F)(F)F                                                                                     | -8.02 | 57.14 | 1.92 | P | IN  |
| QL03443 | 2,2,3,5,6-Pentafluoro-3,6-<br>bis(trifluoromethyl)-5-<br>(trifluorovinyl)oxy]-1,4-dioxane                                                                        | 13845-92-6  | FC(F)=C(F)OC(F)(F)OC(F)=C(F)F                                                                                   | -8.33 | 53.33 | 2.17 | P | IN  |
| QL03444 | 2-(difluoromethylene)-4,4,5-<br>trifluoro-5-(trifluoromethyl)-1,3-<br>dioxolane                                                                                  | 61097-79-8  | FC(F)=C(F)OC1(F)OC(F)(C(F)(F)C(F)(F)C(F)(F)OC1(F)C(F)(F)F                                                       | -8.37 | 56.00 | 2.11 | P | IN  |
| QL03445 | 1,1,3,4,4,4-Hexafluoro-3-<br>(trifluoromethyl)but-1-ene                                                                                                          | 17256-52-9  | FC(F)=C1OC(F)(F)C(F)(O1)C(F)(F)F                                                                                | -7.56 | 53.33 | 1.83 | P | IN  |
| QL03446 | 1,1,3,3,3-Pentafluoropropene                                                                                                                                     | 1840-17-1   | FC(F)=CC(F)(C(F)(F)C(F)(F)F                                                                                     | -6.98 | 60.00 | 1.38 | P | IN  |
| QL03447 |                                                                                                                                                                  | 690-27-7    | FC(F)=CC(F)(F)F                                                                                                 | -6.53 | 55.56 | 1.30 | P | IN  |
| QL03448 | (Nonafluorobutyl)carbonimidoyl                                                                                                                                   | 424-32-8    | FC(F)=NC(F)(F)C(F)(F)C(F)(F)F                                                                                   | -8.44 | 64.71 | 1.90 | P | IN  |
| QL03449 | 1,1,2,2,3,3,4,4-Octafluorobutane-1-<br>sulphonic anhydride                                                                                                       | 93894-55-4  | FC(F)C(F)(F)C(F)(F)C(F)(F)S(=O)(=O)O[S](=O)(=O)C(F)(F)C(F)(F)C(F)(F)F                                           | -9.05 | 48.48 | 2.63 | P | IN  |
| QL03450 | Trichloro(1,1,2,2,3,3,4,4-<br>octafluorobutyl)silane                                                                                                             | 375-63-3    | FC(F)C(F)(F)C(F)(F)C(F)(F)Si(Cl)(Cl)Cl                                                                          | -8.22 | 64.71 | 1.81 | P | IN  |
| QL03451 | 1-(6H-Perfluorohexyl)-1-(fluoren-2-<br>yl)-N-<br>(perfluorobutyl)sulfonyloxymetha<br>nimine                                                                      | 691358-66-4 | FC(F)C(F)(F)C(F)(F)C(F)(F)C(F)(F)C(F)(F)C(=NOS(=O)(=O)C(F)(F)C(F)(F)C(F)(F)C(F)(F)C1=CC2=C(C=C1)C1=C(C2)C=CC=C1 | -8.78 | 35.00 | 2.89 | P | IN  |

|         |                                                                                                                        |                           |                                                                                                           |        |       |      |   |     |
|---------|------------------------------------------------------------------------------------------------------------------------|---------------------------|-----------------------------------------------------------------------------------------------------------|--------|-------|------|---|-----|
|         | 2,2,3,3,4,4,5,5,6,6,7,7,8,8-Tetradecafluoro-1-phenyloctan-1-one                                                        | 1427-89-0                 | FC(F)C(F)(F)C(F)(F)C(F)(F)C(F)(F)C(F)(F)C(=O)C1=CC=CC=C1                                                  | -8.64  | 40.00 | 2.68 | P | IN  |
| QL03452 | 1,1,1,2,2,3,3,4,4,5,5,6,6,7,7,8,8,9,9,10,10,11,11,12,12,13,13,14,14-Nonacosafuorotetradecane                           | 66577-33-1                | FC(F)C(F)(F)C(F)(F)C(F)(F)C(F)(F)C(F)(F)C(F)(F)C(F)(F)C(F)(F)C(F)(F)C(F)(F)F                              | -10.83 | 65.91 | 2.95 | P | OUT |
| QL03453 | 1,1,1,2,2,3,3,4,4,5,5,6,6,7,7,8,8,9,9,10,10,11,11,12,12,13,13-Heptacosafuorotridecane                                  | 423-66-5                  | FC(F)C(F)(F)C(F)(F)C(F)(F)C(F)(F)C(F)(F)C(F)(F)C(F)(F)C(F)(F)C(F)(F)C(F)(F)F                              | -10.70 | 65.85 | 2.89 | P | OUT |
| QL03454 | 1,1,1,2,2,3,3,4,4,5,5,6,6,7,7,8,8,9,9,10,10,11,11,12,12-Pentacosafluorododecane                                        | 66563-68-6                | FC(F)C(F)(F)C(F)(F)C(F)(F)C(F)(F)C(F)(F)C(F)(F)C(F)(F)C(F)(F)C(F)(F)C(F)(F)F                              | -10.37 | 65.79 | 2.75 | P | OUT |
| QL03455 | 1-H-Perfluorodecane                                                                                                    | 375-97-3                  | FC(F)C(F)(F)C(F)(F)C(F)(F)C(F)(F)C(F)(F)C(F)(F)C(F)(F)C(F)(F)C(F)(F)F                                     | -9.85  | 65.63 | 2.51 | P | IN  |
| QL03456 | 1H-Perfluorononane                                                                                                     | 375-94-0                  | FC(F)C(F)(F)C(F)(F)C(F)(F)C(F)(F)C(F)(F)C(F)(F)C(F)(F)F                                                   | -9.69  | 65.52 | 2.45 | P | IN  |
| QL03457 | 2-(((2,2,3,3,4,4,5,5,6,6,7,7,8,8,9,9-Hexadecafluorononyl)oxy)methyl)oxirane                                            | 125370-60-7               | FC(F)C(F)(F)C(F)(F)C(F)(F)C(F)(F)C(F)(F)C(F)(F)COC1CO1                                                    | -8.90  | 42.11 | 2.74 | P | IN  |
| QL03458 | 8H-Perfluorooctane                                                                                                     | 335-65-9                  | FC(F)C(F)(F)C(F)(F)C(F)(F)C(F)(F)C(F)(F)C(F)(F)F                                                          | -9.22  | 65.38 | 2.24 | P | IN  |
| QL03459 | 1H,8H-Perfluorooctane                                                                                                  | 307-99-3                  | FC(F)C(F)(F)C(F)(F)C(F)(F)C(F)(F)C(F)(F)C(F)(F)F                                                          | -8.97  | 61.54 | 2.23 | P | IN  |
| QL03460 |                                                                                                                        |                           |                                                                                                           | -9.03  | 65.22 | 2.16 | P | IN  |
| QL03461 | 1-Hydroperfluoroheptane (6H-Perfluorohexyl)methyl acrylate                                                             | NOCAS_871634<br>2993-85-3 | FC(F)C(F)(F)C(F)(F)C(F)(F)C(F)(F)C(F)(F)C(F)(F)F<br>FC(F)C(F)(F)C(F)(F)C(F)(F)C(F)(F)COC(=O)C=C           | -8.25  | 40.00 | 2.51 | P | IN  |
| QL03462 | 1,1,2,2,3,3,4,4,5,5,6,6-Dodecafluoro-7-(trifluoromethoxy)heptane                                                       | 1737-33-3                 | FC(F)C(F)(F)C(F)(F)C(F)(F)C(F)(F)COC(F)(F)F                                                               | -9.10  | 55.56 | 2.45 | P | IN  |
| QL03463 | 1H-Perfluorohexane                                                                                                     | 355-37-3                  | FC(F)C(F)(F)C(F)(F)C(F)(F)C(F)(F)F                                                                        | -8.45  | 65.00 | 1.90 | P | IN  |
| QL03464 | 1H,6H-Perfluorohexane                                                                                                  | 336-07-2                  | FC(F)C(F)(F)C(F)(F)C(F)(F)C(F)(F)F                                                                        | -8.12  | 60.00 | 1.89 | P | IN  |
| QL03465 | 1,1,1,2,2,3,3,4,4,5,5-Undecafluoropentane                                                                              | 375-61-1                  | FC(F)C(F)(F)C(F)(F)C(F)(F)F                                                                               | -8.22  | 64.71 | 1.81 | P | IN  |
| QL03466 | 5H-Perfluoropentalanal                                                                                                 | 2648-47-7                 | FC(F)C(F)(F)C(F)(F)C(F)(F)C=O                                                                             | -7.27  | 50.00 | 1.79 | P | IN  |
| QL03467 | Butane, 1-chloro-1,1,2,2,3,3,4,4-octafluoro-                                                                           | 423-31-4                  | FC(F)C(F)(F)C(F)(F)CFCl                                                                                   | -7.43  | 64.29 | 1.46 | P | OUT |
| QL03468 | 1H,1H,5H-Perfluoropentyl acrylate                                                                                      | 376-84-1                  | FC(F)C(F)(F)C(F)(F)C(F)(F)COC(=O)C=C                                                                      | -7.29  | 33.33 | 2.26 | P | IN  |
| QL03469 |                                                                                                                        |                           |                                                                                                           | -9.17  | 44.44 | 2.80 | P | IN  |
| QL03470 | 2,2,4,4,6,6-Hexakis((2,2,3,3,4,4,5,5-octafluoropentyl)oxy)-1,3,5,2lambda~5~,4lambda~5~,6lambda~5~-triaza-triphsphinine | 16059-16-8                | FC(F)C(F)(F)C(F)(F)COP1(OCC(F)(F)C(F)(F)C(F)(F)C(F)(F)=NP(OCC(F)(F)C(F)(F)C(F)(F)C(F)(F)C(F)(F)C(F)(F)=N1 | -7.43  | 64.29 | 1.46 | P | OUT |
| QL03471 | 1H-Nonafluorobutane                                                                                                    | 375-17-7                  | FC(F)C(F)(F)C(F)(F)F                                                                                      | -6.34  | 46.67 | 1.46 | P | IN  |
| QL03472 | 2,3,3,4,4,5,5-Heptafluoro-1-pentene                                                                                    | 1547-26-8                 | FC(F)C(F)(F)C(F)(F)C(F)=C                                                                                 | -6.98  | 57.14 | 1.46 | P | IN  |
| QL03473 | 1H,4H-Octafluorobutane                                                                                                 | 377-36-6                  | FC(F)C(F)(F)C(F)(F)C(F)F                                                                                  | -8.00  | 60.00 | 1.84 | P | IN  |
| QL03474 | 1,1,2,2,3,3-Hexafluoro-1-(trifluoromethoxy)propane                                                                     | 67490-36-2                | FC(F)C(F)(F)C(F)(F)OC(F)(F)F                                                                              | -6.14  | 45.45 | 1.41 | P | IN  |
| QL03475 | 1,1,2,2-Tetrafluoro-3-iodopropane                                                                                      | 679-87-8                  | FC(F)C(F)(F)CI                                                                                            | -5.78  | 22.22 | 1.89 | P | OUT |
| QL03476 | 2,2,3,3-Tetrafluoropropyl acrylate (2H-Perfluoroethyl)(1H,1H,3H-perfluoropropyl)ether                                  | 7383-71-3                 | FC(F)C(F)(F)COC(=O)C=C                                                                                    | -7.05  | 44.44 | 1.84 | P | IN  |
| QL03477 | Vinyl 1H,1H,3H-perfluoropropyl ether                                                                                   | 16627-68-2                | FC(F)C(F)(F)COC(F)(F)C(F)F                                                                                | -5.86  | 25.00 | 1.85 | P | OUT |
| QL03478 | ((2,2,3,3-Tetrafluoropropoxy)methyl)oxiran e                                                                           | 29819-80-5                | FC(F)C(F)(F)COC=C                                                                                         | -5.71  | 20.00 | 1.92 | P | OUT |
| QL03479 | 2,2,3,3-Tetrafluoropropyl nonafluorobutane-1-sulfonate                                                                 | 19932-26-4                | FC(F)C(F)(F)COC1CO1                                                                                       | -8.64  | 48.15 | 2.45 | P | IN  |
| QL03480 |                                                                                                                        | 66959-14-6                | FC(F)C(F)(F)COS(=O)(=O)C(F)(F)C(F)(F)C(F)(F)C(F)(F)F                                                      |        |       |      |   |     |





|         |                                                                                                                              |             |                                                                                             |        |       |      |   |     |
|---------|------------------------------------------------------------------------------------------------------------------------------|-------------|---------------------------------------------------------------------------------------------|--------|-------|------|---|-----|
| QL03530 | 1,2,3,3,4,4,5,5,6,6,6-Undecafluorohex-1-ene                                                                                  | 66249-21-6  | FC=C(F)C(F)(F)C(F)(F)C(F)(F)C(F)(F)F                                                        | -8.22  | 61.11 | 1.90 | P | IN  |
| QL03532 | (Z)-1,2,3,3,3-pentafluoropropene                                                                                             | 5528-43-8   | FC=C(F)C(F)(F)F                                                                             | -6.77  | 55.56 | 1.41 | P | IN  |
| QL03533 | (1Z)-1,3,4,4,4-Pentafluoro-3-(trifluoromethyl)but-1-ene                                                                      | 14318-61-7  | FC=C/C(F)(C(F)(F)F)C(F)(F)F                                                                 | -6.66  | 53.33 | 1.42 | P | IN  |
| QL03534 | (1E)-1,3,4,4,4-Pentafluoro-3-(trifluoromethyl)but-1-ene                                                                      | 14149-41-8  | FC=CC(F)(C(F)(F)F)C(F)(F)F                                                                  | -6.66  | 53.33 | 1.42 | P | IN  |
| QL03535 | Perfluoroglutaric anhydride                                                                                                  | 376-68-1    | FC1(F)C(=O)OC(=O)C(F)(F)C1(F)F                                                              | -5.74  | 42.86 | 1.30 | P | IN  |
| QL03536 | Perfluorosuccinic anhydride                                                                                                  | 699-30-9    | FC1(F)C(=O)OC(=O)C1(F)F                                                                     | -4.67  | 36.36 | 0.99 | P | IN  |
| QL03537 | 1,2-Dichloroperfluorocyclohexene                                                                                             | 336-19-6    | FC1(F)C(Cl)=C(Cl)C(F)(F)C(F)(F)C1(F)F                                                       | -6.19  | 62.50 | 0.95 | P | OUT |
| QL03538 | Perfluorocyclohexanecarbonyl bromide                                                                                         | 261761-76-6 | FC1(F)C(F)(F)C(F)(F)C(F)(F)C(F)(F)C1(F)F                                                    | -7.11  | 60.00 | 1.44 | P | IN  |
| QL03539 | Chloroperfluorocyclohexane                                                                                                   | 336-15-2    | FC1(F)C(F)(F)C(F)(F)C(F)(F)C(F)(F)C1(F)F                                                    | -6.37  | 66.67 | 0.92 | P | OUT |
| QL03540 | (Perfluorocyclohexyl)methyl prop-2-enoate                                                                                    | 40677-94-9  | FC1(F)C(F)(F)C(F)(F)C(F)(F)COC(=O)C=C(C)C(F)(F)C1(F)F                                       | -7.47  | 39.29 | 2.17 | P | IN  |
| QL03541 | Perfluorocyclohexane                                                                                                         | 355-68-0    | FC1(F)C(F)(F)C(F)(F)C(F)(F)C(F)(F)C1(F)F                                                    | -6.37  | 66.67 | 0.92 | P | OUT |
| QL03542 | Piperidine, 2,2,3,3,4,4,5,5,6,6-decafluoro-1-(pentafluoroethyl)-                                                             | 564-11-4    | FC1(F)C(F)(F)C(F)(F)C(F)(F)C(N1C(F)(F)C(F)(F)F)(F)F                                         | -8.49  | 65.22 | 1.91 | P | IN  |
| QL03543 | Decafluorocyclopentane                                                                                                       | 376-77-2    | FC1(F)C(F)(F)C(F)(F)C(F)(F)C1(F)F                                                           | -6.37  | 66.67 | 0.92 | P | OUT |
| QL03544 | (Perfluorocyclopentyl)phenyldiazene                                                                                          | 97388-28-8  | FC1(F)C(F)(F)C(F)(F)C(F)(F)N=NC2=CC=CC=C2C1(F)F                                             | -7.01  | 33.33 | 2.13 | P | IN  |
| QL03545 | Octafluorocyclobutane                                                                                                        | 115-25-3    | FC1(F)C(F)(F)C(F)(F)C1(F)F                                                                  | -6.37  | 66.67 | 0.92 | P | OUT |
| QL03546 | Tetracosafuorotetradecahydrophenanthrene                                                                                     | 306-91-2    | FC1(F)C(F)(F)C(F)(F)C2(F)C(F)(F)C1(F)F)C(F)(F)C(F)(F)C(F)(F)C(F)(F)C(F)(F)C(F)(F)C21F       | -8.73  | 63.16 | 2.08 | P | IN  |
| QL03547 | Perflunafene                                                                                                                 | 306-94-5    | FC1(F)C(F)(F)C(F)(F)C2(F)C(F)(F)C(F)(F)C(F)(F)C2(F)C1(F)F                                   | -8.16  | 64.29 | 1.79 | P | IN  |
| QL03548 | 4,4,5,5,6,6-hexafluoro-1,3,2-dithiazinane 1,1,3,3-tetraoxide                                                                 | 84246-29-7  | FC1(F)C(F)(F)S(=O)(=O)NS(=O)(=O)C1(F)F                                                      | -5.22  | 35.29 | 1.27 | P | IN  |
| QL03549 | 1H-Hexafluorocyclopentene                                                                                                    | 1005-73-8   | FC1(F)C=CC(F)(F)C1(F)F                                                                      | -6.00  | 46.15 | 1.32 | P | IN  |
| QL03550 | Perfluoroperhydrofluorene                                                                                                    | 307-08-4    | FC1(F)C2(F)C(F)(F)C3(F)C1(F)C(F)(F)C(F)(F)C3(F)C(F)(F)C(F)(F)C2(F)F                         | -8.39  | 62.86 | 1.93 | P | IN  |
| QL03551 | 2,2,3,3-Tetrafluorooxetane                                                                                                   | 765-63-9    | FC1(F)COC1(F)F                                                                              | -4.49  | 40.00 | 0.81 | P | OUT |
| QL03552 | Perfluoro(oxacyclopentane)                                                                                                   | 773-14-8    | FC1(F)OC(F)(F)C(F)(F)C1(F)F                                                                 | -6.15  | 61.54 | 0.96 | P | OUT |
| QL03553 | Perfluoro-15-crown-5-ether                                                                                                   | 97571-69-2  | FC1(F)OC(F)(F)C(F)(F)OC(F)(F)C(F)(F)OC(F)(F)C(F)(F)OC(F)(F)C(F)(F)OC1(F)F                   | -5.93  | 57.14 | 0.99 | P | OUT |
| QL03554 | 6-Isocyanato-2,2,4,4-tetrafluoro-1,3-benzodioxene                                                                            | 26030-46-6  | FC1(F)OC2=C(C=C(C2)N=C=O)C(F)(F)O1                                                          | -6.46  | 20.00 | 2.26 | P | OUT |
| QL03555 | Tetrafluoroethane beta-sultone                                                                                               | 697-18-7    | FC1(F)OS(=O)(=O)C1(F)F                                                                      | -5.71  | 40.00 | 1.36 | P | IN  |
| QL03556 | 2,2,4,4-Tetrafluoro-1,3-dithietane                                                                                           | 1717-50-6   | FC1(F)SC(F)(F)S1                                                                            | -6.63  | 50.00 | 1.50 | P | IN  |
| QL03557 | 2,2,3,3,4,4,5,5,6,6-Decafluoro-1-(trifluoromethyl)piperidine                                                                 | 359-71-7    | FC1(N(C(C(F)(F)C(C1(F)F)(F)F)(F)F)C(F)(F)F)F                                                | -7.56  | 65.00 | 1.50 | P | OUT |
| QL03558 | 1-Chloroheptafluorocyclopentene                                                                                              | 1759-63-3   | FC1=C(Cl)C(F)(F)C(F)(F)C1(F)F                                                               | -6.15  | 61.54 | 0.96 | P | OUT |
| QL03559 | Perfluoro(4-isopropyltoluene)                                                                                                | 20017-49-6  | FC1=C(F)C(=C(F)C(F)F)=C1C(F)(F)C(F)(F)C(F)(F)C(F)(F)F                                       | -8.62  | 58.33 | 2.16 | P | IN  |
| QL03560 | Decafluorocyclohexene                                                                                                        | 355-75-9    | FC1=C(F)C(F)(F)C(F)(F)C(F)(F)C1(F)F                                                         | -6.19  | 62.50 | 0.95 | P | OUT |
| QL03561 | Octafluorocyclopentene                                                                                                       | 559-40-0    | FC1=C(F)C(F)(F)C(F)(F)C1(F)F                                                                | -6.15  | 61.54 | 0.96 | P | OUT |
| QL03562 | Hexafluorocyclobutene                                                                                                        | 697-11-0    | FC1=C(F)C(F)(F)C1(F)F                                                                       | -6.08  | 60.00 | 0.97 | P | OUT |
| QL03563 | 1,2,3,4,5-Pentafluoro-6-(hepta-decafluorooctyl)benzene                                                                       | 54387-09-6  | FC1=C(F)C(F)F=C(C(F)=C1F)C(F)(F)C(F)(F)C(F)(F)C(F)(F)C(F)(F)C(F)(F)C(F)(F)F                 | -10.05 | 61.11 | 2.73 | P | OUT |
| QL03564 | Perfluorotetralin                                                                                                            | 2342-07-6   | FC1=C(F)C2=C(C(F)=C1F)C(F)(F)C(F)(F)C2(F)F                                                  | -7.56  | 54.55 | 1.79 | P | IN  |
| QL03565 | Octafluoronaphthalene                                                                                                        | 313-72-4    | FC1=C(F)C2=C(C(F)=C1F)C(F)=C(F)C(F)=C2F                                                     | -7.04  | 44.44 | 1.84 | P | IN  |
| QL03566 | Cyclopentene, 1,3,3,4,4,5,5-heptafluoro-                                                                                     | 1892-03-1   | FC1=CC(F)(F)C(F)(F)C1(F)F                                                                   | -5.72  | 53.85 | 0.98 | P | OUT |
| QL03567 | Undecafluorocyclohexane                                                                                                      | 308-24-7    | FC1C(F)(F)C(F)(F)C(F)(F)C(F)(F)C1(F)F                                                       | -6.07  | 61.11 | 0.94 | P | OUT |
| QL03568 | 1-Bromo-2,3,5,6-tetrafluoro-4-{1,1,2,3,3,3-hexafluoro-2-[1,1,2,3,3,3-hexafluoro-2-(heptafluoropropoxy)propoxy]propyl}benzene | 60799-27-1  | Fc1c(F)c(c(F)c(F)c1Br)C(F)(F)C(F)(OC(F)(F)C(F)(OC(F)(F)C(F)(F)C(F)(F)C(F)(F)C(F)(F)C(F)(F)F | -10.05 | 58.54 | 2.80 | P | OUT |

[illegible]





|         |                                                                                                     |              |                                                                        |       |       |      |   |     |
|---------|-----------------------------------------------------------------------------------------------------|--------------|------------------------------------------------------------------------|-------|-------|------|---|-----|
| QL03608 | Pentafluorosulfide Perfluoroalkyl<br>(linear) sulfonic acids, n=8                                   |              | FS(F)(F)(F)(F)C(F)(F)C(F)(F)C(F)(F)C(F)(F)C(F)(F)C(F)(F)S(O)(=O)=O     | -9.47 | 60.00 | 2.50 | P | IN  |
| QL03609 | Pentafluorosulfide Perfluoroalkyl<br>(linear) sulfonic acids, n=7                                   |              | FS(F)(F)(F)(F)C(F)(F)C(F)(F)C(F)(F)C(F)(F)C(F)(F)C(F)(F)S(O)(=O)=O     | -9.26 | 59.38 | 2.42 | P | IN  |
| QL03610 | Pentafluorosulfide Perfluoroalkyl<br>(linear) sulfonic acids, n=6                                   |              | FS(F)(F)(F)(F)C(F)(F)C(F)(F)C(F)(F)C(F)(F)C(F)(F)S(O)(=O)=O            | -8.76 | 58.62 | 2.22 | P | IN  |
| QL03611 | Pentafluorosulfide Perfluoroalkyl<br>(linear) sulfonic acids, n=5                                   |              | FS(F)(F)(F)(F)C(F)(F)C(F)(F)C(F)(F)C(F)(F)S(O)(=O)=O                   | -8.49 | 57.69 | 2.12 | P | IN  |
| QL03612 | Pentafluorosulfide Perfluoroalkyl<br>(linear) sulfonic acids, n=4                                   |              | FS(F)(F)(F)(F)C(F)(F)C(F)(F)C(F)(F)S(O)(=O)=O                          | -7.85 | 56.52 | 1.87 | P | IN  |
| QL03613 | Pentafluorosulfide Perfluoroalkyl<br>(linear) sulfonic acids, n=3                                   |              | FS(F)(F)(F)(F)C(F)(F)C(F)(F)S(O)(=O)=O                                 | -7.49 | 55.00 | 1.75 | P | IN  |
| QL03614 | Ammonium perfluorobutanoate                                                                         | 10495-86-0   | N.[O-]C(=O)C(F)(F)C(F)(F)C(F)(F)F                                      | -6.59 | 41.18 | 1.73 | P | IN  |
| QL03615 | perfluoropropanesulfonamido<br>ethanol, n =3                                                        |              | N(CCO)S(=O)(=O)C(F)(F)C(F)(F)C(F)(F)F                                  | -6.99 | 30.43 | 2.21 | P | IN  |
| QL03616 | perfluoroethanesulfonamido<br>ethanol, n =2                                                         |              | N(CCO)S(=O)(=O)C(F)(F)C(F)(F)F                                         | -6.09 | 25.00 | 1.95 | P | OUT |
| QL03617 | 4,4,5,5,6,6,6-Heptafluoro-L-<br>norleucine                                                          | 148043-94-1  | N[C@@H](CC(F)(F)C(F)(F)C(F)(F)C(F)(F)C(F)(F)O)=O                       | -6.45 | 31.82 | 1.92 | P | IN  |
| QL03618 | Isooctanesulfonamide,                                                                               |              |                                                                        |       |       |      |   |     |
| QL03619 | heptadecafluoro-                                                                                    | 93894-56-5   | N[S](=O)(=O)C(F)(F)C(F)(F)C(F)(F)C(F)(F)C(F)(F)C(F)(F)C(F)(F)C(F)(F)   | -8.49 | 54.84 | 2.20 | P | IN  |
| QL03619 | (S)-Perfluorobutanesulfonamide                                                                      | 1303994-31-1 | N[S@](=O)(=O)C(F)(F)C(F)(F)C(F)(F)C(F)(F)F                             | -7.31 | 50.00 | 1.81 | P | IN  |
| QL03620 | 3,3,4,4,5,5,6,6-Nonafluoro-1-<br>nitrohex-1-en-2-amine                                              | 223260-92-2  | NC(=[N+][([O-])=O)C(F)(F)C(F)(F)C(F)(F)C(F)(F)F                        | -7.59 | 40.91 | 2.18 | P | IN  |
| QL03621 | 3-Amino-4,4,5,5,6,6,6-heptafluoro-<br>1-phenylhex-2-en-1-one                                        | 91508-85-9   | NC(=CC(=O)C1=CC=CC=C1)C(F)(F)C(F)(F)C(F)(F)F                           | -7.10 | 24.14 | 2.43 | P | OUT |
| QL03622 | Perfluorooctanamide                                                                                 | 307-31-3     | NC(=N)C(F)(F)C(F)(F)C(F)(F)C(F)(F)C(F)(F)C(F)(F)C(F)(F)F               | -8.49 | 53.57 | 2.24 | P | IN  |
| QL03623 | 2,2,3,3,4,4,5,5,6,6,7,7-<br>Tridecafluoroheptanimidamide                                            | 25264-81-7   | NC(=N)C(F)(F)C(F)(F)C(F)(F)C(F)(F)C(F)(F)C(F)(F)F                      | -8.22 | 52.00 | 2.16 | P | IN  |
| QL03624 | 2,2,3,3,4,4,5,5,6,6-<br>Undecafluorohexanimidamide                                                  | 464-21-1     | NC(=N)C(F)(F)C(F)(F)C(F)(F)C(F)(F)C(F)(F)F                             | -7.52 | 50.00 | 1.90 | P | IN  |
| QL03625 | Perfluorobutyrylamidine                                                                             | 375-19-9     | NC(=N)C(F)(F)C(F)(F)C(F)(F)F                                           | -6.16 | 43.75 | 1.46 | P | IN  |
| QL03626 | 2-(2,2,3,3,4,4,4-<br>Heptafluorobutanoyl)hydrazine-1-<br>carboximidamide                            | 25978-98-7   | NC(=N)NNC(=O)C(F)(F)C(F)(F)C(F)(F)F                                    | -7.03 | 31.82 | 2.18 | P | IN  |
| QL03627 | (1Z)-2,2,3,3,4,4,4-Heptafluoro-N'-<br>(2,2,3,3,4,4,4-<br>heptafluorobutanimidoyl)butanim<br>idamide | 648-13-5     | NC(=N/C(=N)C(F)(F)C(F)(F)C(F)(F)C(F)(F)C(F)(F)F                        | -8.59 | 50.00 | 2.38 | P | IN  |
| QL03628 | (1r,4r)-4-<br>(Nonafluorobutyl)cyclohexane-1-<br>carboxamide                                        | 88951-21-7   | NC(=O)[C@H]1CC[C@@H]1(CC1)C(F)(F)C(F)(F)C(F)(F)C(F)(F)F                | -7.31 | 26.47 | 2.46 | P | OUT |
| QL03629 | (1r,4r)-4-<br>(Heptafluoropropyl)cyclohexane-1-<br>carboxamide                                      | 88951-19-3   | NC(=O)[C@H]1CC[C@@H]1(CC1)C(F)(F)C(F)(F)C(F)(F)F                       | -6.70 | 22.58 | 2.29 | P | OUT |
| QL03630 | (1s,4s)-4-<br>(Nonafluorobutyl)cyclohexane-1-<br>carboxamide                                        | 88951-20-6   | NC(=O)[C@H]1CC[C@H]1(CC1)C(F)(F)C(F)(F)C(F)(F)C(F)(F)F                 | -7.31 | 26.47 | 2.46 | P | OUT |
| QL03631 | (1s,4s)-4-<br>(Heptafluoropropyl)cyclohexane-1-<br>carboxamide                                      | 88951-18-2   | NC(=O)[C@H]1CC[C@H]1(CC1)C(F)(F)C(F)(F)C(F)(F)F                        | -6.70 | 22.58 | 2.29 | P | OUT |
| QL03632 | 2,3,3,3-Tetrafluoro-2-<br>(trifluoromethyl)propanamide                                              | 662-20-4     | NC(=O)C(F)(C(F)(F)F)C(F)(F)F                                           | -5.85 | 46.67 | 1.24 | P | IN  |
| QL03633 | nonadecafluorodecanamide                                                                            | 307-40-4     | NC(=O)C(F)(F)C(F)(F)C(F)(F)C(F)(F)C(F)(F)C(F)(F)C(F)(F)C(F)(F)C(F)(F)F | -9.35 | 57.58 | 2.51 | P | IN  |

|         |                                                                                                                |             |                                                                                        |       |       |      |   |     |
|---------|----------------------------------------------------------------------------------------------------------------|-------------|----------------------------------------------------------------------------------------|-------|-------|------|---|-----|
| QL03634 | 2,2,3,3,4,4,5,5,6,6,7,7,8,8,9,9-Heptafluorooctanonanamide                                                      | 82854-34-0  | NC(=O)C(F)(F)C(F)(F)C(F)(F)C(F)(F)C(F)(F)C(F)(F)C(F)(F)F                               | -9.14 | 56.67 | 2.45 | P | IN  |
| QL03635 | Perfluorooctanamide                                                                                            | 423-54-1    | NC(=O)C(F)(F)C(F)(F)C(F)(F)C(F)(F)C(F)(F)C(F)(F)F                                      | -8.62 | 55.56 | 2.24 | P | IN  |
| QL03636 | Perfluorooctanedioic diamide                                                                                   | 3492-23-7   | NC(=O)C(F)(F)C(F)(F)C(F)(F)C(F)(F)C(F)(F)C(F)(F)C(N)=O                                 | -7.81 | 42.86 | 2.23 | P | IN  |
| QL03637 | Perfluoroheptanamide                                                                                           | 2358-22-7   | NC(=O)C(F)(F)C(F)(F)C(F)(F)C(F)(F)C(F)(F)C(F)(F)F                                      | -8.35 | 54.17 | 2.16 | P | IN  |
| QL03638 | 2,2,3,3,4,4,5,5,6,6,6-Undecafluorohexanamide                                                                   | 335-54-6    | NC(=O)C(F)(F)C(F)(F)C(F)(F)C(F)(F)C(F)(F)C(F)(F)F                                      | -7.67 | 52.38 | 1.90 | P | IN  |
| QL03639 | 2,2,3,3,4,4,5,5,6,6-Decafluoro-6-[(1,1,1,2,3,3,3-heptafluoropropan-2-yl)oxy]hexanamide                         | 29952-92-9  | NC(=O)C(F)(F)C(F)(F)C(F)(F)C(F)(F)C(F)(F)OC(F)(C(F)(F)F)C(F)(F)F                       | -8.95 | 54.84 | 2.41 | P | IN  |
| QL03640 | Octafluoroadipamide                                                                                            | 355-66-8    | NC(=O)C(F)(F)C(F)(F)C(F)(F)C(F)(F)C(F)(F)C(N)=O                                        | -6.66 | 36.36 | 1.89 | P | IN  |
| QL03641 | Nonafluoropentanamide                                                                                          | 13485-61-5  | NC(=O)C(F)(F)C(F)(F)C(F)(F)C(F)(F)C(F)(F)F                                             | -7.31 | 50.00 | 1.81 | P | IN  |
| QL03642 | Perfluoropentanamide                                                                                           | 355-81-7    | NC(=O)C(F)(F)C(F)(F)C(F)(F)C(F)(F)F                                                    | -6.97 | 44.44 | 1.81 | P | IN  |
| QL03643 | Heptafluorobutyramide                                                                                          | 662-50-0    | NC(=O)C(F)(F)C(F)(F)C(F)(F)F                                                           | -6.34 | 46.67 | 1.46 | P | IN  |
| QL03644 | Pentafluoropropionamide                                                                                        | 354-76-7    | NC(=O)C(F)(F)C(F)(F)F                                                                  | -5.81 | 41.67 | 1.36 | P | IN  |
| QL03645 | Propanamide, 3-[1-[difluoro[1,2,2-trifluoroethenyl)oxy)methyl]-1,2,2,2-tetrafluoroethoxy]-2,2,3,3-tetrafluoro- | 69804-18-8  | NC(=O)C(F)(F)C(F)(F)OC(F)(C(F)(F)F)C(F)(F)OC(F)=C(F)F                                  | -8.59 | 48.15 | 2.43 | P | IN  |
| QL03646 | 2,2,3,3-Tetrafluoropropionamide                                                                                | 2069-86-5   | NC(=O)C(F)(F)C(F)F                                                                     | -5.36 | 33.33 | 1.39 | P | IN  |
| QL03647 | Perfluoro-2(1-propoxy)perfluoropropanamide                                                                     | 13140-35-7  | NC(=O)C(F)(OC(F)(F)C(F)(F)C(F)(F)F)C(F)(F)F                                            | -7.40 | 50.00 | 1.85 | P | IN  |
| QL03648 | 2,3,3,3-Tetrafluoro-2-[1,1,2,3,3-hexafluoro-2-(heptafluoropropoxy)propoxy]propanamide                          | 60308-67-0  | NC(=O)C(F)(OC(F)(F)C(F)(OC(F)(F)C(F)(F)C(F)(F)C(F)(F)C(F)(F)F)C(F)(F)F)C(F)(F)F        | -8.83 | 53.13 | 2.40 | P | IN  |
| QL03649 | 2,3,3,3-Tetrafluoro-2-[1,1,2,3,3-hexafluoro-2-(heptafluoropropoxy)propoxy]propanamide                          | 51445-02-4  | NC(=O)C(F)(OC(F)(F)C(F)(OC(F)(F)C(F)(F)C(F)(F)C(F)(F)C(F)(F)C(F)(F)F)C(F)(F)F)C(F)(F)F | -9.52 | 54.76 | 2.67 | P | IN  |
| QL03650 | 2,3,3,3-Tetrafluoro-2-(trifluoromethoxy)propanamide                                                            | 67710-48-9  | NC(=O)C(F)(OC(F)(F)C(F)(F)F                                                            | -5.98 | 43.75 | 1.38 | P | IN  |
| QL03651 | Flupoxam                                                                                                       | 119126-15-7 | NC(=O)c1nc(-c2cccc2)n(n1)-c1ccc(Cl)c(COCC(F)(F)C(F)(F)F)c1                             | -7.43 | 13.33 | 2.88 | P | OUT |
| QL03652 | 1,1,1,2,3,3,4,4,5,5,6,6,7,7,8,8-Heptafluorooctan-2-yl carbamate                                                | 92681-65-7  | NC(=O)OC(F)(C(F)(F)F)C(F)(F)C(F)(F)C(F)(F)C(F)(F)C(F)(F)F                              | -9.01 | 54.84 | 2.43 | P | IN  |
| QL03653 | 2,2,3,3,4,4,4-Heptafluorobutanethioamide                                                                       | 375-20-2    | NC(=S)C(F)(F)C(F)(F)C(F)(F)F                                                           | -6.34 | 46.67 | 1.46 | P | IN  |
| QL03654 | 2-(Perfluoropropyl)glycine                                                                                     | 26208-02-6  | NC(C(O)=O)C(F)(F)C(F)(F)C(F)(F)F                                                       | -6.54 | 36.84 | 1.83 | P | IN  |
| QL03655 | 4,4,5,5,6,6,6-Heptafluoronorleucine                                                                            | 15960-01-7  | NC(CC(F)(F)C(F)(F)C(F)(F)C(F)(F)C(O)=O                                                 | -6.45 | 31.82 | 1.92 | P | IN  |
| QL03656 | 3-Amino-4,4,5,5,6,6,6-heptafluorohexanoic acid                                                                 | 150618-42-1 | NC(CC(O)=O)C(F)(F)C(F)(F)C(F)(F)F                                                      | -6.45 | 31.82 | 1.92 | P | IN  |
| QL03657 | 2-Amino-3-(perfluoropropyl)-1-phenyl-3-propanol                                                                | 322392-46-1 | NC(CC1=CC=CC=C1)C(O)C(F)(F)C(F)(F)C(F)(F)F                                             | -6.97 | 21.21 | 2.45 | P | OUT |
| QL03658 | 2-Amino-5,5,6,6,7,7,8,8,8-nonafluorooctanoic acid                                                              | 125162-63-2 | NC(CCC(F)(F)C(F)(F)C(F)(F)C(F)(F)C(F)(F)C(O)=O                                         | -7.22 | 32.14 | 2.26 | P | IN  |
| QL03659 | 2-Amino-5,5,6,6,7,7,7-heptafluoroheptanoic acid                                                                | 10325-10-7  | NC(CCC(F)(F)C(F)(F)C(F)(F)C(F)(F)C(O)=O                                                | -6.68 | 28.00 | 2.13 | P | OUT |
| QL03660 | 2-Amino-6,6,7,7,8,8,8-heptafluorooctanoic acid                                                                 | 10325-14-1  | NC(CCCC(F)(F)C(F)(F)C(F)(F)C(F)(F)C(O)=O                                               | -6.67 | 25.00 | 2.21 | P | OUT |
| QL03661 | Undecafluoropentan-1-amine                                                                                     | 134380-80-6 | NC(F)(F)C(F)(F)C(F)(F)C(F)(F)C(F)(F)F                                                  | -7.77 | 57.89 | 1.79 | P | IN  |
| QL03662 | 6-Bromo-8-(1,1,1,2,3,3,3-heptafluoropropan-2-yl)quinolin-5-amine                                               | 917923-88-7 | NC1=C(Br)C=C(C2=C1C=CC=N2)C(F)(C(F)(F)F)C(F)(F)F                                       | -6.10 | 28.57 | 1.86 | P | OUT |
| QL03663 | 3-(Tridecafluorohexyl)pyridin-4-amine                                                                          | 143094-26-2 | NC1=C(C(=NC=C1)C(F)(F)C(F)(F)C(F)(F)C(F)(F)C(F)(F)F                                    | -8.23 | 41.94 | 2.45 | P | IN  |

[illegible]



|         |                                                                                                                    |              |                                                                                              |        |       |      |   |     |
|---------|--------------------------------------------------------------------------------------------------------------------|--------------|----------------------------------------------------------------------------------------------|--------|-------|------|---|-----|
| QL03719 | 3,3,4,4,5,5,6,6,7,7,8,8,8-<br>Tridecafluorooctylamine                                                              | 30556-86-6   | NCCCC(F)(F)C(F)(F)C(F)(F)C(F)(F)C(F)(F)F                                                     | -8.04  | 46.43 | 2.23 | P | IN  |
| QL03720 | 3,3,4,4,5,5,6,6,7,7,7-<br>Undecafluoroheptan-1-amine                                                               | 1346521-42-3 | NCCCC(F)(F)C(F)(F)C(F)(F)C(F)(F)C(F)(F)F                                                     | -7.75  | 44.00 | 2.17 | P | IN  |
| QL03721 | 3,3,4,4,5,5,5-Heptafluoropentan-1-<br>amine                                                                        | 1000509-29-4 | NCCCC(F)(F)C(F)(F)C(F)(F)F                                                                   | -6.61  | 36.84 | 1.85 | P | IN  |
| QL03722 | 3-(Perfluorooctyl)propylamine<br>N-(3-Aminopropyl)-<br>2,2,3,3,4,4,5,5,6,6,7,7,8,8,8-<br>pentadecafluorooctanamide | 139175-50-1  | NCCCC(F)(F)C(F)(F)C(F)(F)C(F)(F)C(F)(F)C(F)(F)C(F)(F)F                                       | -9.01  | 45.95 | 2.68 | P | IN  |
| QL03723 |                                                                                                                    | 85938-56-3   | NCCCN(C(=O)C(F)(F)C(F)(F)C(F)(F)C(F)(F)C(F)(F)C(F)(F)C(F)(F)F                                | -8.76  | 39.47 | 2.75 | P | IN  |
| QL03724 | 2,2,3,3,4,4,4-<br>Heptafluorobutanimidohydrazide                                                                   | 663-24-1     | NNC(=N)C(F)(F)C(F)(F)C(F)(F)F                                                                | -6.69  | 38.89 | 1.84 | P | IN  |
| QL03725 | Perfluorotetradecanedioic acid<br>dihydrazide                                                                      | 5102-53-4    | NNC(=O)C(F)(F)C(F)(F)C(F)(F)C(F)(F)C(F)(F)C(F)(F)C(F)(F)C(F)(F)C(F)(F)C(F)(F)C(=O)NN         | -10.00 | 48.00 | 3.07 | P | OUT |
| QL03726 | 2,2,3,3,4,4,5,5,6,6,7,7,7-<br>Tridecafluoroheptanehydrazide                                                        | 33843-69-5   | NNC(=O)C(F)(F)C(F)(F)C(F)(F)C(F)(F)C(F)(F)C(F)(F)F                                           | -8.27  | 50.00 | 2.24 | P | IN  |
| QL03727 | 2,2,3,3,4,4,4-<br>heptafluorobutanehydrazide                                                                       | 1515-05-5    | NNC(=O)C(F)(F)C(F)(F)C(F)(F)F                                                                | -6.83  | 41.18 | 1.84 | P | IN  |
| QL03728 | perfluoropropane sulfonamide,<br>n=3                                                                               |              | NS(=O)(=O)C(F)(F)C(F)(F)C(F)(F)F                                                             | -6.13  | 43.75 | 1.45 | P | IN  |
| QL03729 | perfluoroethane sulfonamide, n=2<br>4-                                                                             |              | NS(=O)(=O)C(F)(F)C(F)(F)F                                                                    | -5.53  | 38.46 | 1.32 | P | IN  |
| QL03730 | [(Heptadecafluorooctyl)oxy]benze-<br>ne-1-sulfonamide                                                              | 89932-76-3   | NS(=O)(=O)C1=CC=C(OC(F)(F)C(F)(F)C(F)(F)C(F)(F)C(F)(F)C(F)(F)C(F)(F)C(F)(F)C=C1              | -9.24  | 40.48 | 2.94 | P | IN  |
| QL03731 | 4-{2-[(1,1,2,2,3,3,4,4,4-<br>Nonafluorobutane-1-<br>sulfonyl)amino]ethyl}benzene-1-<br>sulfonamide                 | 316826-59-2  | NS(=O)(=O)c1ccc(CCNS(=O)(=O)C(F)(F)C(F)(F)C(F)(F)C(F)(F)C(F)(F)cc1                           | -7.89  | 22.50 | 2.83 | P | OUT |
| QL03732 | 2,2,3,3,4,4,5,5,6,6,7,7,8,8,9,9,9-<br>Heptadecafluoro-N-[(4-<br>sulfamoylphenyl)methyl]nonanam-<br>ide             | 316827-33-5  | NS(=O)(=O)c1ccc(CNC(=O)C(F)(F)C(F)(F)C(F)(F)C(F)(F)C(F)(F)C(F)(F)C(F)(F)cc1                  | -9.34  | 35.42 | 3.12 | P | OUT |
| QL03733 | 2,2,3,3,4,4,5,5,6,6,7,7,7-<br>Tridecafluoro-N-[(4-<br>sulfamoylphenyl)methyl]heptana-<br>mide                      | 165618-99-5  | NS(=O)(=O)c1ccc(CNC(=O)C(F)(F)C(F)(F)C(F)(F)C(F)(F)C(F)(F)C(F)(F)Fcc1                        | -8.65  | 30.95 | 2.94 | P | OUT |
| QL03734 | 2,2,3,3,4,4,5,5,5-Nonafluoro-N-[(4-<br>sulfamoylphenyl)methyl]pentana-<br>mide                                     | 165618-98-4  | NS(=O)(=O)c1ccc(CNC(=O)C(F)(F)C(F)(F)C(F)(F)C(F)(F)Fcc1                                      | -7.78  | 25.00 | 2.71 | P | OUT |
| QL03735 | 2,2,3,3,4,4,4-Heptafluoro-N-[(4-<br>sulfamoylphenyl)methyl]butanami-<br>de                                         | 165618-97-3  | NS(=O)(=O)c1ccc(CNC(=O)C(F)(F)C(F)(F)C(F)(F)Fcc1                                             | -7.42  | 21.21 | 2.66 | P | OUT |
| QL03736 | 3,3,4,4,5,5,6,6,7,7,8,8,8-<br>Tridecafluorooctane-1-<br>sulfonamide                                                | 29765-95-5   | NS(=O)(=O)CCC(F)(F)C(F)(F)C(F)(F)C(F)(F)C(F)(F)C(F)(F)F                                      | -8.23  | 41.94 | 2.44 | P | IN  |
| QL03737 | 5-(Perfluoropropyl)-2,2-dimethyl-<br>3,5-pentanedione barium(2+)<br>hydrate (211)                                  | 143457-82-3  | O.[Ba++].CC(C)(C)C(=O)CC(=O)C(F)(F)C(F)(F)C(F)(F)F.CC(C)(C)C(=O)CC(=O)C(F)(F)C(F)(F)C(F)(F)F | -6.74  | 21.88 | 2.33 | P | OUT |
| QL03738 | 2,2,3,3,4,4,5,5,5-<br>Nonafluoropentanal hydrate (11)                                                              | 907607-08-3  | O.FC(F)(F)C(F)(F)C(F)(F)C(F)(F)C=O                                                           | -7.65  | 47.37 | 2.03 | P | IN  |
| QL03739 | 2,2,3,3,4,4,4-Heptafluorobutanal--<br>water (1/1)<br>Potassium<br>pentadecafluorooctanoate--water<br>(1/1/2)       | 907607-07-2  | O.FC(F)(F)C(F)(F)C(F)(F)C=O                                                                  | -6.78  | 43.75 | 1.74 | P | IN  |
| QL03740 |                                                                                                                    | 98065-31-7   | O.O.[K+].[O-]C(=O)C(F)(F)C(F)(F)C(F)(F)C(F)(F)C(F)(F)C(F)(F)C(F)(F)F                         | -8.64  | 46.88 | 2.49 | P | IN  |
| QL03741 | Perfluorooctanoic acid-1,2-13C2                                                                                    | 864071-08-9  | O[13C](=O)[13C](F)(F)C(F)(F)C(F)(F)C(F)(F)C(F)(F)C(F)(F)C(F)(F)F                             | -8.75  | 57.69 | 2.24 | P | IN  |



[illegible]





[illegible]

|         |                                                                                                 |              |                                                                                     |        |       |      |   |     |
|---------|-------------------------------------------------------------------------------------------------|--------------|-------------------------------------------------------------------------------------|--------|-------|------|---|-----|
| QL03845 | multiple H-substituted perfluoroalkyl sulfates_i n=2                                            |              | O=S(O)(=O)OC(F)(F)CC(F)(F)C[H]                                                      | -5.37  | 21.05 | 1.74 | P | OUT |
| QL03846 | multiple H-substituted perfluoroalkyl sulfates_i n=3                                            |              | O=S(O)(=O)OC(F)(F)CC(F)(F)CC(F)(F)C[H]                                              | -6.20  | 24.00 | 2.03 | P | OUT |
| QL03847 | multiple H-substituted perfluoroalkyl sulfates n=2                                              |              | O=S(O)(=O)OCC(F)(F)CC(F)(F)[H]                                                      | -5.70  | 21.05 | 1.88 | P | OUT |
| QL03848 | multiple H-substituted perfluoroalkyl sulfates n=3                                              |              | O=S(O)(=O)OCC(F)(F)CC(F)(F)CC(F)(F)[H]                                              | -6.64  | 24.00 | 2.23 | P | OUT |
| QL03849 | p-perfluorous nonenoxybenzenesulfonate                                                          | 271794-15-1  | O=S(O)(C(C=C1)=CC=C1O/C(C(F)(F)F)=C(C(C(F)(F)F)(C(F)(F)F)C(C(F)(F)F)C(C(F)(F)F)F)=O | -7.77  | 40.48 | 2.28 | P | IN  |
| QL03850 | Perfluoro-2-butyltetrahydrofuran                                                                | 335-36-4     | O1C(C(C(C(F)(F)F)(F)F)(F)F)(C(C(C1(F)F)(F)F)(F)F                                    | -8.90  | 64.00 | 2.13 | P | IN  |
| QL03851 | 2,3,5-Trifluorotetrahydro-4-(pentafluoroethyl)-2,3,4,5-tetrakis(trifluoromethyl)furan           | 69661-30-9   | O1C(F)(C(C(F)(C1(F)C(F)(F)F)C(F)(F)F)(C(F)(F)C(F)(F)F)C(F)(F)F                      | -8.21  | 64.52 | 1.81 | P | IN  |
| QL03852 | Perfluoro-2-methyloxane                                                                         | 356-47-8     | O1C(F)(C(F)(F)C(F)(F)C(F)(F)C1(F)C(F)C(F)(F)F                                       | -7.50  | 63.16 | 1.52 | P | OUT |
| QL03853 | Perfluoro-2-nonylpentahydropyran                                                                | 68155-54-4   | O1C(F)(F)C(F)(F)C(C(C1(F)C(F)(F)C(F)(F)C(F)(F)C(F)(F)C(F)(F)C(F)(F)C(F)(F)F         | -10.62 | 65.12 | 2.87 | P | OUT |
| QL03854 | Dodecafluorooxepane                                                                             | 788-41-0     | O1C(F)(F)C(F)(F)C(F)(F)C(C(C1(F)F)(F)F)(F)F                                         | -6.22  | 63.16 | 0.95 | P | OUT |
| QL03855 | B-(3,5-bis(Perfluoro-1-methylethyl)phenyl)boronic acid                                          | 1402929-36-5 | OB(O)C1=CC(=CC(=C1)C(F)(C(F)(F)F)C(F)(F)F)C(F)(C(F)(F)F)C(F)(F)F                    | -6.91  | 41.18 | 1.87 | P | IN  |
| QL03856 | B-(4-(Perfluoro-1-methylethyl)phenyl)boronic acid                                               | 1184850-50-7 | OB(O)C1=CC=C(C(=C1)C(F)(C(F)(F)F)C(F)(F)F                                           | -6.61  | 28.00 | 2.10 | P | OUT |
| QL03857 | multiple double bond-perfluoroalkyl (linear) carboxylic acids, n=0                              |              | OC(/C(F)=C(F)/C(F)=C(F)/F)=O                                                        | -6.71  | 38.46 | 1.86 | P | IN  |
| QL03858 | N-Allylperfluoro-2-propoxypropanamide                                                           | 165663-65-0  | OC(=NCC=C)C(F)(OC(F)(F)C(F)(F)C(F)(F)F)C(F)(F)F                                     | -8.01  | 37.93 | 2.46 | P | IN  |
| QL03859 | N-(2,2,3,3,4,4,4-Heptafluorobutanoyl)-D-phenylalanine                                           | 868275-40-5  | OC(=O)[C@H](C1CCCC1)NC(=O)C(F)(F)C(F)(F)C(F)(F)F                                    | -7.08  | 20.59 | 2.52 | P | OUT |
| QL03860 | (Nonafluorobutyl)cyclohexane-1-carboxylic acid                                                  | 88951-25-1   | OC(=O)[C@H](C@H)1CC[C@H](CC1)C(F)(F)C(F)(F)C(F)(F)C(F)(F)F                          | -7.36  | 27.27 | 2.46 | P | OUT |
| QL03861 | (Heptafluoropropyl)cyclohexane-1-carboxylic acid                                                | 88951-23-9   | OC(=O)[C@H](C@H)1CC[C@H](CC1)C(F)(F)C(F)(F)C(F)(F)F                                 | -6.75  | 23.33 | 2.29 | P | OUT |
| QL03862 | (1s,4s)-4-(Nonafluorobutyl)cyclohexane-1-carboxylic acid                                        | 88951-24-0   | OC(=O)[C@H](C@H)1CC[C@H](CC1)C(F)(F)C(F)(F)C(F)(F)C(F)(F)F                          | -7.36  | 27.27 | 2.46 | P | OUT |
| QL03863 | (Heptafluoropropyl)cyclohexane-1-carboxylic acid                                                | 88951-22-8   | OC(=O)[C@H](C@H)1CC[C@H](CC1)C(F)(F)C(F)(F)C(F)(F)F                                 | -6.75  | 23.33 | 2.29 | P | OUT |
| QL03864 | Monoperfluorooctyl itaconate                                                                    | 230295-05-3  | OC(=O)C(=C)CC(=O)OC(F)(F)C(F)(F)C(F)(F)C(F)(F)C(F)(F)C(F)(F)C(F)(F)F                | -9.35  | 43.59 | 2.90 | P | IN  |
| QL03865 | 3,3,4,4,4-Pentafluoro-2,2-bis(pentafluoroethyl)butanoic acid                                    | 1882109-58-1 | OC(=O)C(C(F)(F)C(F)(F)F)(C(F)(F)C(F)(F)F)C(F)(F)C(F)(F)F                            | -7.46  | 57.69 | 1.66 | P | IN  |
| QL03866 | 3,3,4,4,4-Pentafluoro-2-(1,1,1,2,3,3,3-heptafluoropropan-2-yl)-2-(trifluoromethyl)butanoic acid | 1882109-59-2 | OC(=O)C(C(F)(F)C(F)(F)C(F)(F)F)C(F)(F)C(F)(F)C(F)(F)F                               | -7.46  | 57.69 | 1.66 | P | IN  |
| QL03867 | 3,3,4,4,5,5,5-Heptafluoro-2-(pentafluoroethyl)-2-(trifluoromethyl)pentanoic acid                | 1882109-63-8 | OC(=O)C(C(F)(F)C(F)(F)C(F)(F)F)C(F)(F)C(F)(F)C(F)(F)F                               | -7.78  | 57.69 | 1.80 | P | IN  |
| QL03868 | 4,4,4-Trifluoro-2,2,3,3-tetrakis(trifluoromethyl)butanoic acid                                  | 1882109-62-7 | OC(=O)C(C(F)(F)C(F)(F)F)C(C(F)(F)F)C(F)(F)C(F)(F)F                                  | -6.36  | 57.69 | 1.16 | P | OUT |
| QL03869 | 3,4,4,5,5,5-Hexafluoro-2,2,3-tris(trifluoromethyl)pentanoic acid                                | 1882109-69-4 | OC(=O)C(C(F)(F)C(F)(F)F)C(F)(F)C(F)(F)C(F)(F)C(F)(F)F                               | -7.46  | 57.69 | 1.66 | P | IN  |



|         |                                                                                          |              |                                                                                       |
|---------|------------------------------------------------------------------------------------------|--------------|---------------------------------------------------------------------------------------|
| QL03890 | 2,3,3,4,4,5,6,6-Nonafluoro-2,5-bis(trifluoromethyl)hexanoic acid                         | 1882109-80-9 | OC(=O)C(F)(C(F)(F)F)C(F)(F)C(F)(C(F)(F)F)C(F)(F)F                                     |
| QL03891 | 2,3,3,4,4,5,5,6,6,7,7,7-Dodecafluoro-2-(trifluoromethyl)heptanoic acid                   | 207678-51-1  | OC(=O)C(F)(C(F)(F)F)C(F)(F)C(F)(F)C(F)(F)C(F)(F)F                                     |
| QL03892 | Perfluoroisobutyric acid                                                                 | 335-10-4     | OC(=O)C(F)(C(F)(F)F)C(F)(F)F                                                          |
| QL03893 | Nonanoic acid, 2,4,6,8,9-pentachloro-2,3,3,4,4,5,5,6,7,7,8,9,9-dodecafluoro-             | 754-87-0     | OC(=O)C(F)(Cl)C(F)(F)C(F)(Cl)C(F)(F)C(F)(Cl)C(F)(F)C(F)(Cl)C(F)(F)Cl                  |
| QL03894 | 2,2,4,4,5,5,5-Heptafluoro-3-(pentafluoroethyl)-3-(trifluoromethyl)pentanoic acid         | 1882109-67-2 | OC(=O)C(F)(F)C(C(F)(F)F)(C(F)(F)C(F)(F)F)C(F)(F)C(F)(F)F                              |
| QL03895 | 2,2,4,4,5,5,5-Hexafluoro-3,3,4-tris(trifluoromethyl)pentanoic acid                       | 1882109-74-1 | OC(=O)C(F)(F)C(C(F)(F)F)(C(F)(F)F)C(F)(C(F)(F)F)C(F)(F)F                              |
| QL03896 | 2,2,4,4,5,5,6,6,6-Nonafluoro-3,3-bis(trifluoromethyl)hexanoic acid                       | 1812247-20-3 | OC(=O)C(F)(F)C(C(F)(F)F)(C(F)(F)F)C(F)(F)C(F)(F)C(F)(F)F                              |
| QL03897 | 2,2,3,4,4,5,5-Octafluoro-3-(1,1,1,2,3,3,3-heptafluoropropan-2-yl)pentanoic acid          | 1882109-68-3 | OC(=O)C(F)(F)C(F)(C(F)(F)F)C(F)(F)C(F)(C(F)(F)F)C(F)(F)F                              |
| QL03898 | 2,2,3,4,4,5,5,6,6,6-Decafluoro-3-(pentafluoroethyl)hexanoic acid                         | 1882109-78-5 | OC(=O)C(F)(F)C(C(F)(F)F)C(F)(F)C(F)(F)C(F)(F)C(F)(F)F                                 |
| QL03899 | 2,2,3,5,5,5-Hexafluoro-3,4,4-tris(trifluoromethyl)pentanoic acid                         | 1882109-75-2 | OC(=O)C(F)(F)C(C(F)(F)F)C(C(F)(F)F)C(F)(F)C(F)(F)C(F)(F)F                             |
| QL03900 | 2,2,3,4,4,5,5,6,6,6-Nonafluoro-3,4-bis(trifluoromethyl)hexanoic acid                     | 1882109-81-0 | OC(=O)C(F)(F)C(C(F)(F)F)C(C(F)(F)F)C(F)(F)C(F)(F)C(F)(F)F                             |
| QL03901 | Perfluoro-3,5,5-trimethylhexanoic acid                                                   | 238403-51-5  | OC(=O)C(F)(F)C(C(F)(F)F)C(F)(F)C(C(F)(F)F)(C(F)(F)F)C(F)(F)F                          |
| QL03902 | 2,2,3,4,4,5,5,6,6,6-Nonafluoro-3,5-bis(trifluoromethyl)hexanoic acid                     | 1144512-35-5 | OC(=O)C(F)(F)C(C(F)(F)F)C(F)(F)C(F)(C(F)(F)F)C(F)(F)F                                 |
| QL03903 | Perfluoro-3,7-dimethyloctanoic acid                                                      | 172155-07-6  | OC(=O)C(F)(F)C(C(F)(F)F)C(F)(F)C(F)(F)C(F)(F)C(F)(F)C(F)(F)F                          |
| QL03904 | 2,2,3,4,4,5,5,6,6,7,7,7-Dodecafluoro-3-(trifluoromethyl)heptanoic acid                   | 705240-04-6  | OC(=O)C(F)(F)C(C(F)(F)F)C(F)(F)C(F)(F)C(F)(F)C(F)(F)F                                 |
| QL03905 | 3,5,7,9,11,11-Hexachloro-2,2,3,4,4,5,6,6,7,8,8,9,10,10,11-pentadecafluoroundecanoic acid | 53281-37-1   | OC(=O)C(F)(F)C(C(F)(Cl)C(F)(F)C(F)(Cl)C(F)(F)C(F)(Cl)C(F)(F)C(F)(Cl)C(F)(F)C(F)(Cl)Cl |
| QL03906 | 3,5,7,9,9-Pentachloro-2,2,3,4,4,5,6,6,7,8,8,9-dodecafluorononanoic acid                  | 53281-25-7   | OC(=O)C(F)(F)C(C(F)(Cl)C(F)(F)C(F)(Cl)C(F)(F)C(F)(Cl)C(F)(F)C(F)(Cl)Cl                |
| QL03907 | 3,5,7,8-Tetrachloroperfluorooctanoic acid                                                | 2923-68-4    | OC(=O)C(F)(F)C(C(F)(Cl)C(F)(F)C(F)(Cl)C(F)(F)C(F)(Cl)C(F)(F)Cl                        |
| QL03908 | 3,5,7,7-Tetrachloro-2,2,3,4,4,5,6,6,7-nonafluoroheptanoic acid                           | 16069-78-6   | OC(=O)C(F)(F)C(C(F)(Cl)C(F)(F)C(F)(Cl)C(F)(F)C(F)(Cl)Cl                               |
| QL03909 | 3,5,6-Trichloroperfluorohexanoic acid                                                    | 2106-54-9    | OC(=O)C(F)(F)C(C(F)(Cl)C(F)(F)C(F)(Cl)C(F)(F)Cl                                       |
| QL03910 | 2,2,3,3,5,5,6,6,6-Nonafluoro-4,4-bis(trifluoromethyl)hexanoic acid                       | 1192593-79-5 | OC(=O)C(F)(F)C(C(F)(F)C(C(F)(F)F)(C(F)(F)F)C(F)(F)C(F)(F)F                            |
| QL03911 | 2,2,3,3,4,4,5,5,6,6,6-Decafluoro-4-(pentafluoroethyl)hexanoic acid                       | 1882109-79-6 | OC(=O)C(F)(F)C(C(F)(F)C(F)(C(F)(F)F)C(F)(F)C(F)(F)C(F)(F)F                            |

-7.78

57.69

1.80

P

IN

-8.49

57.69

2.12

P

IN

-6.05

50.00

1.24

P

IN

-9.26

58.62

2.45

P

IN

-7.43

57.69

1.64

P

IN

-7.43

57.69

1.64

P

IN

-7.68

57.69

1.76

P

IN

-7.46

57.69

1.66

P

IN

-7.87

57.69

1.84

P

IN

-7.46

57.69

1.66

P

IN

-7.68

57.69

1.76

P

IN

-7.84

58.62

1.80

P

IN

-7.87

57.69

1.84

P

IN

-8.75

59.38

2.19

P

IN

-8.44

57.69

2.10

P

IN

-9.88

60.00

2.69

P

IN

-9.26

58.62

2.45

P

IN

-8.75

57.69

2.24

P

IN

-8.50

56.52

2.16

P

IN

-7.83

55.00

1.90

P

IN

-7.68

57.69

1.76

P

IN

-7.87

57.69

1.84

P

IN

|         |                                                                      |              |                                                                                                                                                                                                                                                                                                                                                                                                                                                                                                                                                                                                                                                                                                                                                                                                                                                                                                                                                                                                                                                                                                                                                                                                                                                                                                                                                                                                                                                                                                                                                                                                                                                                                                                                                                                                                                                                                                                                                                                                                                                                                                                                                                                                                                                                                                                                                                                                                                                                                                                                                                                                                                                                                                                                                                                                                                                                                                                                                                                                                                                                                                                                                                                                                                                                                                                                                                                                                                                                                                                                                                                                                                                                                                                                                                                                                                                                                                                                                                                                                                                                                                                                                                                                                                                                                                                                                                                                                                                                                                                                                                                                                                                                                                                                                                                                                                                                                                                                                                                                                                                                                                                                                                                                                                                                                                                                                                                                                                                                                                                                                                                                                                                                                                                                                                                                                                                                                                                                                                                                                                                                                                                                                                                                                                                                                                                                                                                                                                                                                                                                                                                                                                                                                                                                                                                                                                                                                                                                                                                                                                                                                                                                                                                                                                                                                                                                                                                                                                                                                                                                                                                                                                                                                                                                                                                                                                                                                                                                                                                                                                                                                                                                                                                                                                                                                                                                                                                                                                                                                                                                                                                                                                                                                                                                                                                                                                                                                                                                                                                                                                                                                                                                                                                                                                                                                                                                                                                                                                                                                                                                                                                                                                                                                                                                                                                                                                                                                                                                                                                                                                                                                                                                                                                                                                                                                                                                                                                                                                                                                                                                                                                                                                                                                                                                                                                                                                                                                                                                                                                                                                                                                                                                                                                                                                                                                                                                                                                                                                                                                   |       |       |      |   |    |
|---------|----------------------------------------------------------------------|--------------|-----------------------------------------------------------------------------------------------------------------------------------------------------------------------------------------------------------------------------------------------------------------------------------------------------------------------------------------------------------------------------------------------------------------------------------------------------------------------------------------------------------------------------------------------------------------------------------------------------------------------------------------------------------------------------------------------------------------------------------------------------------------------------------------------------------------------------------------------------------------------------------------------------------------------------------------------------------------------------------------------------------------------------------------------------------------------------------------------------------------------------------------------------------------------------------------------------------------------------------------------------------------------------------------------------------------------------------------------------------------------------------------------------------------------------------------------------------------------------------------------------------------------------------------------------------------------------------------------------------------------------------------------------------------------------------------------------------------------------------------------------------------------------------------------------------------------------------------------------------------------------------------------------------------------------------------------------------------------------------------------------------------------------------------------------------------------------------------------------------------------------------------------------------------------------------------------------------------------------------------------------------------------------------------------------------------------------------------------------------------------------------------------------------------------------------------------------------------------------------------------------------------------------------------------------------------------------------------------------------------------------------------------------------------------------------------------------------------------------------------------------------------------------------------------------------------------------------------------------------------------------------------------------------------------------------------------------------------------------------------------------------------------------------------------------------------------------------------------------------------------------------------------------------------------------------------------------------------------------------------------------------------------------------------------------------------------------------------------------------------------------------------------------------------------------------------------------------------------------------------------------------------------------------------------------------------------------------------------------------------------------------------------------------------------------------------------------------------------------------------------------------------------------------------------------------------------------------------------------------------------------------------------------------------------------------------------------------------------------------------------------------------------------------------------------------------------------------------------------------------------------------------------------------------------------------------------------------------------------------------------------------------------------------------------------------------------------------------------------------------------------------------------------------------------------------------------------------------------------------------------------------------------------------------------------------------------------------------------------------------------------------------------------------------------------------------------------------------------------------------------------------------------------------------------------------------------------------------------------------------------------------------------------------------------------------------------------------------------------------------------------------------------------------------------------------------------------------------------------------------------------------------------------------------------------------------------------------------------------------------------------------------------------------------------------------------------------------------------------------------------------------------------------------------------------------------------------------------------------------------------------------------------------------------------------------------------------------------------------------------------------------------------------------------------------------------------------------------------------------------------------------------------------------------------------------------------------------------------------------------------------------------------------------------------------------------------------------------------------------------------------------------------------------------------------------------------------------------------------------------------------------------------------------------------------------------------------------------------------------------------------------------------------------------------------------------------------------------------------------------------------------------------------------------------------------------------------------------------------------------------------------------------------------------------------------------------------------------------------------------------------------------------------------------------------------------------------------------------------------------------------------------------------------------------------------------------------------------------------------------------------------------------------------------------------------------------------------------------------------------------------------------------------------------------------------------------------------------------------------------------------------------------------------------------------------------------------------------------------------------------------------------------------------------------------------------------------------------------------------------------------------------------------------------------------------------------------------------------------------------------------------------------------------------------------------------------------------------------------------------------------------------------------------------------------------------------------------------------------------------------------------------------------------------------------------------------------------------------------------------------------------------------------------------------------------------------------------------------------------------------------------------------------------------------------------------------------------------------------------------------------------------------------------------------------------------------------------------------------------------------------------------------------------------------------------------------------------------------------------------------------------------------------------------------------------------------------------------------------------------------------------------------------------------------------------------------------------------------------------------------------------------------------------------------------------------------------------------------------------------------------------------------------------------------------------------------------------------------------------------------------------------------------------------------------------------------------------------------------------------------------------------------------------------------------------------------------------------------------------------------------------------------------------------------------------------------------------------------------------------------------------------------------------------------------------------------------------------------------------------------------------------------------------------------------------------------------------------------------------------------------------------------------------------------------------------------------------------------------------------------------------------------------------------------------------------------------------------------------------------------------------------------------------------------------------------------------------------------------------------------------------------------------------------------------------------------------------------------------------------------------------------------------------------------------------------------------------------------------------------------------------------------------------------------------------------------------------------------------------------------------------------------------------------------------------------------------------------------------------------------------------------------------------------------------------------------------------------------------------------------------------------------------------------------------------------------------------------------------------------------------------------------------------------------------------------------------------------------------------------------------------------------------------------------------------------------------------------------------------------------------------------------------------------------------------------------------------------------------------------------------------------------------------------------------------------------------------------------------------------------------------------------------------------------------------------------------------------------------------------------------------------------------------------------------------------------------------------------------------------------------------------------------------------------------------------------------------------------------------|-------|-------|------|---|----|
| QL03912 | 2,2,3,3,4,5,6,6-Nonafluoro-4,5-bis(trifluoromethyl)hexanoic acid     | 1144512-36-6 | OC(=O)C(F)(F)C(F)(F)C(F)(F)C(F)(F)C(F)(F)C(F)(F)                                                                                                                                                                                                                                                                                                                                                                                                                                                                                                                                                                                                                                                                                                                                                                                                                                                                                                                                                                                                                                                                                                                                                                                                                                                                                                                                                                                                                                                                                                                                                                                                                                                                                                                                                                                                                                                                                                                                                                                                                                                                                                                                                                                                                                                                                                                                                                                                                                                                                                                                                                                                                                                                                                                                                                                                                                                                                                                                                                                                                                                                                                                                                                                                                                                                                                                                                                                                                                                                                                                                                                                                                                                                                                                                                                                                                                                                                                                                                                                                                                                                                                                                                                                                                                                                                                                                                                                                                                                                                                                                                                                                                                                                                                                                                                                                                                                                                                                                                                                                                                                                                                                                                                                                                                                                                                                                                                                                                                                                                                                                                                                                                                                                                                                                                                                                                                                                                                                                                                                                                                                                                                                                                                                                                                                                                                                                                                                                                                                                                                                                                                                                                                                                                                                                                                                                                                                                                                                                                                                                                                                                                                                                                                                                                                                                                                                                                                                                                                                                                                                                                                                                                                                                                                                                                                                                                                                                                                                                                                                                                                                                                                                                                                                                                                                                                                                                                                                                                                                                                                                                                                                                                                                                                                                                                                                                                                                                                                                                                                                                                                                                                                                                                                                                                                                                                                                                                                                                                                                                                                                                                                                                                                                                                                                                                                                                                                                                                                                                                                                                                                                                                                                                                                                                                                                                                                                                                                                                                                                                                                                                                                                                                                                                                                                                                                                                                                                                                                                                                                                                                                                                                                                                                                                                                                                                                                                                                                                                                                  | -7.87 | 57.69 | 1.84 | P | IN |
| QL03913 | 2,2,3,3,4,5,5,6,6,7,7-Dodecafluoro-4-(trifluoromethyl)heptanoic acid | 1144512-18-4 | OC(=O)C(F)(F)C(F)(F)C(F)(F)C(F)(F)C(F)(F)C(F)(F)C(F)(F)                                                                                                                                                                                                                                                                                                                                                                                                                                                                                                                                                                                                                                                                                                                                                                                                                                                                                                                                                                                                                                                                                                                                                                                                                                                                                                                                                                                                                                                                                                                                                                                                                                                                                                                                                                                                                                                                                                                                                                                                                                                                                                                                                                                                                                                                                                                                                                                                                                                                                                                                                                                                                                                                                                                                                                                                                                                                                                                                                                                                                                                                                                                                                                                                                                                                                                                                                                                                                                                                                                                                                                                                                                                                                                                                                                                                                                                                                                                                                                                                                                                                                                                                                                                                                                                                                                                                                                                                                                                                                                                                                                                                                                                                                                                                                                                                                                                                                                                                                                                                                                                                                                                                                                                                                                                                                                                                                                                                                                                                                                                                                                                                                                                                                                                                                                                                                                                                                                                                                                                                                                                                                                                                                                                                                                                                                                                                                                                                                                                                                                                                                                                                                                                                                                                                                                                                                                                                                                                                                                                                                                                                                                                                                                                                                                                                                                                                                                                                                                                                                                                                                                                                                                                                                                                                                                                                                                                                                                                                                                                                                                                                                                                                                                                                                                                                                                                                                                                                                                                                                                                                                                                                                                                                                                                                                                                                                                                                                                                                                                                                                                                                                                                                                                                                                                                                                                                                                                                                                                                                                                                                                                                                                                                                                                                                                                                                                                                                                                                                                                                                                                                                                                                                                                                                                                                                                                                                                                                                                                                                                                                                                                                                                                                                                                                                                                                                                                                                                                                                                                                                                                                                                                                                                                                                                                                                                                                                                                                                                           | -8.44 | 57.69 | 2.10 | P | IN |
| QL03914 | 2,2,3,3,4,4,6,6-Nonafluoro-5,5-bis(trifluoromethyl)hexanoic acid     | 1144512-34-4 | OC(=O)C(F)(F)C(F)(F)C(F)(F)C(C(F)(F)C(F)(F)C(F)(F)C(F)(F)C(F)(F)F                                                                                                                                                                                                                                                                                                                                                                                                                                                                                                                                                                                                                                                                                                                                                                                                                                                                                                                                                                                                                                                                                                                                                                                                                                                                                                                                                                                                                                                                                                                                                                                                                                                                                                                                                                                                                                                                                                                                                                                                                                                                                                                                                                                                                                                                                                                                                                                                                                                                                                                                                                                                                                                                                                                                                                                                                                                                                                                                                                                                                                                                                                                                                                                                                                                                                                                                                                                                                                                                                                                                                                                                                                                                                                                                                                                                                                                                                                                                                                                                                                                                                                                                                                                                                                                                                                                                                                                                                                                                                                                                                                                                                                                                                                                                                                                                                                                                                                                                                                                                                                                                                                                                                                                                                                                                                                                                                                                                                                                                                                                                                                                                                                                                                                                                                                                                                                                                                                                                                                                                                                                                                                                                                                                                                                                                                                                                                                                                                                                                                                                                                                                                                                                                                                                                                                                                                                                                                                                                                                                                                                                                                                                                                                                                                                                                                                                                                                                                                                                                                                                                                                                                                                                                                                                                                                                                                                                                                                                                                                                                                                                                                                                                                                                                                                                                                                                                                                                                                                                                                                                                                                                                                                                                                                                                                                                                                                                                                                                                                                                                                                                                                                                                                                                                                                                                                                                                                                                                                                                                                                                                                                                                                                                                                                                                                                                                                                                                                                                                                                                                                                                                                                                                                                                                                                                                                                                                                                                                                                                                                                                                                                                                                                                                                                                                                                                                                                                                                                                                                                                                                                                                                                                                                                                                                                                                                                                                                                                                                 | -7.78 | 57.69 | 1.80 | P | IN |
| QL03915 | 2,2,3,3,4,4,5,6,6,7,7-Dodecafluoro-5-(trifluoromethyl)heptanoic acid | 909009-42-3  | OC(=O)C(F)(F)C(F)(F)C(F)(F)C(F)(F)C(F)(F)C(F)(F)C(F)(F)F                                                                                                                                                                                                                                                                                                                                                                                                                                                                                                                                                                                                                                                                                                                                                                                                                                                                                                                                                                                                                                                                                                                                                                                                                                                                                                                                                                                                                                                                                                                                                                                                                                                                                                                                                                                                                                                                                                                                                                                                                                                                                                                                                                                                                                                                                                                                                                                                                                                                                                                                                                                                                                                                                                                                                                                                                                                                                                                                                                                                                                                                                                                                                                                                                                                                                                                                                                                                                                                                                                                                                                                                                                                                                                                                                                                                                                                                                                                                                                                                                                                                                                                                                                                                                                                                                                                                                                                                                                                                                                                                                                                                                                                                                                                                                                                                                                                                                                                                                                                                                                                                                                                                                                                                                                                                                                                                                                                                                                                                                                                                                                                                                                                                                                                                                                                                                                                                                                                                                                                                                                                                                                                                                                                                                                                                                                                                                                                                                                                                                                                                                                                                                                                                                                                                                                                                                                                                                                                                                                                                                                                                                                                                                                                                                                                                                                                                                                                                                                                                                                                                                                                                                                                                                                                                                                                                                                                                                                                                                                                                                                                                                                                                                                                                                                                                                                                                                                                                                                                                                                                                                                                                                                                                                                                                                                                                                                                                                                                                                                                                                                                                                                                                                                                                                                                                                                                                                                                                                                                                                                                                                                                                                                                                                                                                                                                                                                                                                                                                                                                                                                                                                                                                                                                                                                                                                                                                                                                                                                                                                                                                                                                                                                                                                                                                                                                                                                                                                                                                                                                                                                                                                                                                                                                                                                                                                                                                                                                                                          | -8.44 | 57.69 | 2.10 | P | IN |
| QL03916 | Perfluoro-6-(trifluoromethyl)heptanoic acid                          | 15166-06-0   | OC(=O)C(F)(F)C(F)(F)C(F)(F)C(F)(F)C(F)(F)C(F)(F)C(F)(F)F                                                                                                                                                                                                                                                                                                                                                                                                                                                                                                                                                                                                                                                                                                                                                                                                                                                                                                                                                                                                                                                                                                                                                                                                                                                                                                                                                                                                                                                                                                                                                                                                                                                                                                                                                                                                                                                                                                                                                                                                                                                                                                                                                                                                                                                                                                                                                                                                                                                                                                                                                                                                                                                                                                                                                                                                                                                                                                                                                                                                                                                                                                                                                                                                                                                                                                                                                                                                                                                                                                                                                                                                                                                                                                                                                                                                                                                                                                                                                                                                                                                                                                                                                                                                                                                                                                                                                                                                                                                                                                                                                                                                                                                                                                                                                                                                                                                                                                                                                                                                                                                                                                                                                                                                                                                                                                                                                                                                                                                                                                                                                                                                                                                                                                                                                                                                                                                                                                                                                                                                                                                                                                                                                                                                                                                                                                                                                                                                                                                                                                                                                                                                                                                                                                                                                                                                                                                                                                                                                                                                                                                                                                                                                                                                                                                                                                                                                                                                                                                                                                                                                                                                                                                                                                                                                                                                                                                                                                                                                                                                                                                                                                                                                                                                                                                                                                                                                                                                                                                                                                                                                                                                                                                                                                                                                                                                                                                                                                                                                                                                                                                                                                                                                                                                                                                                                                                                                                                                                                                                                                                                                                                                                                                                                                                                                                                                                                                                                                                                                                                                                                                                                                                                                                                                                                                                                                                                                                                                                                                                                                                                                                                                                                                                                                                                                                                                                                                                                                                                                                                                                                                                                                                                                                                                                                                                                                                                                                                                                          | -8.49 | 57.69 | 2.12 | P | IN |
| QL03917 | TP_8230                                                              |              | OC(=O)C(F)(F)C(F)(F)C(F)(F)C(F)(F)C(F)(F)C(F)(F)C(F)(F)C(F)(F)C(F)(F)C(F)(F)C(F)(F)C(F)(F)C(F)(F)C(F)(F)C(F)(F)C(F)(F)C(F)(F)C(F)(F)C(F)(F)C(F)(F)C(F)(F)C(F)(F)C(F)(F)C(F)(F)C(F)(F)C(F)(F)C(F)(F)C(F)(F)C(F)(F)C(F)(F)C(F)(F)C(F)(F)C(F)(F)C(F)(F)C(F)(F)C(F)(F)C(F)(F)C(F)(F)C(F)(F)C(F)(F)C(F)(F)C(F)(F)C(F)(F)C(F)(F)C(F)(F)C(F)(F)C(F)(F)C(F)(F)C(F)(F)C(F)(F)C(F)(F)C(F)(F)C(F)(F)C(F)(F)C(F)(F)C(F)(F)C(F)(F)C(F)(F)C(F)(F)C(F)(F)C(F)(F)C(F)(F)C(F)(F)C(F)(F)C(F)(F)C(F)(F)C(F)(F)C(F)(F)C(F)(F)C(F)(F)C(F)(F)C(F)(F)C(F)(F)C(F)(F)C(F)(F)C(F)(F)C(F)(F)C(F)(F)C(F)(F)C(F)(F)C(F)(F)C(F)(F)C(F)(F)C(F)(F)C(F)(F)C(F)(F)C(F)(F)C(F)(F)C(F)(F)C(F)(F)C(F)(F)C(F)(F)C(F)(F)C(F)(F)C(F)(F)C(F)(F)C(F)(F)C(F)(F)C(F)(F)C(F)(F)C(F)(F)C(F)(F)C(F)(F)C(F)(F)C(F)(F)C(F)(F)C(F)(F)C(F)(F)C(F)(F)C(F)(F)C(F)(F)C(F)(F)C(F)(F)C(F)(F)C(F)(F)C(F)(F)C(F)(F)C(F)(F)C(F)(F)C(F)(F)C(F)(F)C(F)(F)C(F)(F)C(F)(F)C(F)(F)C(F)(F)C(F)(F)C(F)(F)C(F)(F)C(F)(F)C(F)(F)C(F)(F)C(F)(F)C(F)(F)C(F)(F)C(F)(F)C(F)(F)C(F)(F)C(F)(F)C(F)(F)C(F)(F)C(F)(F)C(F)(F)C(F)(F)C(F)(F)C(F)(F)C(F)(F)C(F)(F)C(F)(F)C(F)(F)C(F)(F)C(F)(F)C(F)(F)C(F)(F)C(F)(F)C(F)(F)C(F)(F)C(F)(F)C(F)(F)C(F)(F)C(F)(F)C(F)(F)C(F)(F)C(F)(F)C(F)(F)C(F)(F)C(F)(F)C(F)(F)C(F)(F)C(F)(F)C(F)(F)C(F)(F)C(F)(F)C(F)(F)C(F)(F)C(F)(F)C(F)(F)C(F)(F)C(F)(F)C(F)(F)C(F)(F)C(F)(F)C(F)(F)C(F)(F)C(F)(F)C(F)(F)C(F)(F)C(F)(F)C(F)(F)C(F)(F)C(F)(F)C(F)(F)C(F)(F)C(F)(F)C(F)(F)C(F)(F)C(F)(F)C(F)(F)C(F)(F)C(F)(F)C(F)(F)C(F)(F)C(F)(F)C(F)(F)C(F)(F)C(F)(F)C(F)(F)C(F)(F)C(F)(F)C(F)(F)C(F)(F)C(F)(F)C(F)(F)C(F)(F)C(F)(F)C(F)(F)C(F)(F)C(F)(F)C(F)(F)C(F)(F)C(F)(F)C(F)(F)C(F)(F)C(F)(F)C(F)(F)C(F)(F)C(F)(F)C(F)(F)C(F)(F)C(F)(F)C(F)(F)C(F)(F)C(F)(F)C(F)(F)C(F)(F)C(F)(F)C(F)(F)C(F)(F)C(F)(F)C(F)(F)C(F)(F)C(F)(F)C(F)(F)C(F)(F)C(F)(F)C(F)(F)C(F)(F)C(F)(F)C(F)(F)C(F)(F)C(F)(F)C(F)(F)C(F)(F)C(F)(F)C(F)(F)C(F)(F)C(F)(F)C(F)(F)C(F)(F)C(F)(F)C(F)(F)C(F)(F)C(F)(F)C(F)(F)C(F)(F)C(F)(F)C(F)(F)C(F)(F)C(F)(F)C(F)(F)C(F)(F)C(F)(F)C(F)(F)C(F)(F)C(F)(F)C(F)(F)C(F)(F)C(F)(F)C(F)(F)C(F)(F)C(F)(F)C(F)(F)C(F)(F)C(F)(F)C(F)(F)C(F)(F)C(F)(F)C(F)(F)C(F)(F)C(F)(F)C(F)(F)C(F)(F)C(F)(F)C(F)(F)C(F)(F)C(F)(F)C(F)(F)C(F)(F)C(F)(F)C(F)(F)C(F)(F)C(F)(F)C(F)(F)C(F)(F)C(F)(F)C(F)(F)C(F)(F)C(F)(F)C(F)(F)C(F)(F)C(F)(F)C(F)(F)C(F)(F)C(F)(F)C(F)(F)C(F)(F)C(F)(F)C(F)(F)C(F)(F)C(F)(F)C(F)(F)C(F)(F)C(F)(F)C(F)(F)C(F)(F)C(F)(F)C(F)(F)C(F)(F)C(F)(F)C(F)(F)C(F)(F)C(F)(F)C(F)(F)C(F)(F)C(F)(F)C(F)(F)C(F)(F)C(F)(F)C(F)(F)C(F)(F)C(F)(F)C(F)(F)C(F)(F)C(F)(F)C(F)(F)C(F)(F)C(F)(F)C(F)(F)C(F)(F)C(F)(F)C(F)(F)C(F)(F)C(F)(F)C(F)(F)C(F)(F)C(F)(F)C(F)(F)C(F)(F)C(F)(F)C(F)(F)C(F)(F)C(F)(F)C(F)(F)C(F)(F)C(F)(F)C(F)(F)C(F)(F)C(F)(F)C(F)(F)C(F)(F)C(F)(F)C(F)(F)C(F)(F)C(F)(F)C(F)(F)C(F)(F)C(F)(F)C(F)(F)C(F)(F)C(F)(F)C(F)(F)C(F)(F)C(F)(F)C(F)(F)C(F)(F)C(F)(F)C(F)(F)C(F)(F)C(F)(F)C(F)(F)C(F)(F)C(F)(F)C(F)(F)C(F)(F)C(F)(F)C(F)(F)C(F)(F)C(F)(F)C(F)(F)C(F)(F)C(F)(F)C(F)(F)C(F)(F)C(F)(F)C(F)(F)C(F)(F)C(F)(F)C(F)(F)C(F)(F)C(F)(F)C(F)(F)C(F)(F)C(F)(F)C(F)(F)C(F)(F)C(F)(F)C(F)(F)C(F)(F)C(F)(F)C(F)(F)C(F)(F)C(F)(F)C(F)(F)C(F)(F)C(F)(F)C(F)(F)C(F)(F)C(F)(F)C(F)(F)C(F)(F)C(F)(F)C(F)(F)C(F)(F)C(F)(F)C(F)(F)C(F)(F)C(F)(F)C(F)(F)C(F)(F)C(F)(F)C(F)(F)C(F)(F)C(F)(F)C(F)(F)C(F)(F)C(F)(F)C(F)(F)C(F)(F)C(F)(F)C(F)(F)C(F)(F)C(F)(F)C(F)(F)C(F)(F)C(F)(F)C(F)(F)C(F)(F)C(F)(F)C(F)(F)C(F)(F)C(F)(F)C(F)(F)C(F)(F)C(F)(F)C(F)(F)C(F)(F)C(F)(F)C(F)(F)C(F)(F)C(F)(F)C(F)(F)C(F)(F)C(F)(F)C(F)(F)C(F)(F)C(F)(F)C(F)(F)C(F)(F)C(F)(F)C(F)(F)C(F)(F)C(F)(F)C(F)(F)C(F)(F)C(F)(F)C(F)(F)C(F)(F)C(F)(F)C(F)(F)C(F)(F)C(F)(F)C(F)(F)C(F)(F)C(F)(F)C(F)(F)C(F)(F)C(F)(F)C(F)(F)C(F)(F)C(F)(F)C(F)(F)C(F)(F)C(F)(F)C(F)(F)C(F)(F)C(F)(F)C(F)(F)C(F)(F)C(F)(F)C(F)(F)C(F)(F)C(F)(F)C(F)(F)C(F)(F)C(F)(F)C(F)(F)C(F)(F)C(F)(F)C(F)(F)C(F)(F)C(F)(F)C(F)(F)C(F)(F)C(F)(F)C(F)(F)C(F)(F)C(F)(F)C(F)(F)C(F)(F)C(F)(F)C(F)(F)C(F)(F)C(F)(F)C(F)(F)C(F)(F)C(F)(F)C(F)(F)C(F)(F)C(F)(F)C(F)(F)C(F)(F)C(F)(F)C(F)(F)C(F)(F)C(F)(F)C(F)(F)C(F)(F)C(F)(F)C(F)(F)C(F)(F)C(F)(F)C(F)(F)C(F)(F)C(F)(F)C(F)(F)C(F)(F)C(F)(F)C(F)(F)C(F)(F)C(F)(F)C(F)(F)C(F)(F)C(F)(F)C(F)(F)C(F)(F)C(F)(F)C(F)(F)C(F)(F)C(F)(F)C(F)(F)C(F)(F)C(F)(F)C(F)(F)C(F)(F)C(F)(F)C(F)(F)C(F)(F)C(F)(F)C(F)(F)C(F)(F)C(F)(F)C(F)(F)C(F)(F)C(F)(F)C(F)(F)C(F)(F)C(F)(F)C(F)(F)C(F)(F)C(F)(F)C(F)(F)C(F)(F)C(F)(F)C(F)(F)C(F)(F)C(F)(F)C(F)(F)C(F)(F)C(F)(F)C(F)(F)C(F)(F)C(F)(F)C(F)(F)C(F)(F)C(F)(F)C(F)(F)C(F)(F)C(F)(F)C(F)(F)C(F)(F)C(F)(F)C(F)(F)C(F)(F)C(F)(F)C(F)(F)C(F)(F)C(F)(F)C(F)(F)C(F)(F)C(F)(F)C(F)(F)C(F)(F)C(F)(F)C(F)(F)C(F)(F)C(F)(F)C(F)(F)C(F)(F)C(F)(F)C(F)(F)C(F)(F)C(F)(F)C(F)(F)C(F)(F)C(F)(F)C(F)(F)C(F)(F)C(F)(F)C(F)(F)C(F)(F)C(F)(F)C(F)(F)C(F)(F)C(F)(F)C(F)(F)C(F)(F)C(F)(F)C(F)(F)C(F)(F)C(F)(F)C(F)(F)C(F)(F)C(F)(F)C(F)(F)C(F)(F)C(F)(F)C(F)(F)C(F)(F)C(F)(F)C(F)(F)C(F)(F)C(F)(F)C(F)(F)C(F)(F)C(F)(F)C(F)(F)C(F)(F)C(F)(F)C(F)(F)C(F)(F)C(F)(F)C(F)(F)C(F)(F)C(F)(F)C(F)(F)C(F)(F)C(F)(F)C(F)(F)C(F)(F)C(F)(F)C(F)(F)C(F)(F)C(F)(F)C(F)(F)C(F)(F)C(F)(F)C(F)(F)C(F)(F)C(F)(F)C(F)(F)C(F)(F)C(F)(F)C(F)(F)C(F)(F)C(F)(F)C(F)(F)C(F)(F)C(F)(F)C(F)(F)C(F)(F)C(F)(F)C(F)(F)C(F)(F)C(F)(F)C(F)(F)C(F)(F)C(F)(F)C(F)(F)C(F)(F)C(F)(F)C(F)(F)C(F)(F)C(F)(F)C(F)(F)C(F)(F)C(F)(F)C(F)(F)C(F)(F)C(F)(F)C(F)(F)C(F)(F)C(F)(F)C(F)(F)C(F)(F)C(F)(F)C(F)(F)C(F)(F)C(F)(F)C(F)(F)C(F)(F)C(F)(F)C(F)(F)C(F)(F)C(F)(F)C(F)(F)C(F)(F)C(F)(F)C(F)(F)C(F)(F)C(F)(F)C(F)(F)C(F)(F)C(F)(F)C(F)(F)C(F)(F)C(F)(F)C(F)(F)C(F)(F)C(F)(F)C(F)(F)C(F)(F)C(F)(F)C(F)(F)C(F)(F)C(F)(F)C(F)(F)C(F)(F)C(F)(F)C(F)(F)C(F)(F)C(F)(F)C(F)(F)C(F)(F)C(F)(F)C(F)(F)C(F)(F)C(F)(F)C(F)(F)C(F)(F)C(F)(F)C(F)(F)C(F)(F)C(F)(F)C(F)(F)C(F)(F)C(F)(F)C(F)(F)C(F)(F)C(F)(F)C(F)(F)C(F)(F)C(F)(F)C(F)(F)C(F)(F)C(F)(F)C(F)(F)C(F)(F)C(F)(F)C(F)(F)C(F)(F)C(F)(F)C(F)(F)C(F)(F)C(F)(F)C(F)(F)C(F)(F)C(F)(F)C(F)(F)C(F)(F)C(F)(F)C(F)(F)C(F)(F)C(F)(F)C(F)(F)C(F)(F)C(F)(F)C(F)(F)C(F)(F)C(F)(F)C(F)(F)C(F)(F)C(F)(F)C(F)(F)C(F)(F)C(F)(F)C(F)(F)C(F)(F)C(F)(F)C(F)(F)C(F)(F)C(F)(F)C(F)(F)C(F)(F)C(F)(F)C(F)(F)C(F)(F)C(F)(F)C(F)(F)C(F)(F)C(F)(F)C(F)(F)C(F)(F)C(F)(F)C(F)(F)C(F)(F)C(F)(F)C(F)(F)C(F)(F)C(F)(F)C(F)(F)C(F)(F)C(F)(F)C(F)(F)C(F)(F)C(F)(F)C(F)(F)C(F)(F)C(F)(F)C(F)(F)C(F)(F)C(F)(F)C(F)(F)C(F)(F)C(F)(F)C(F)(F)C(F)(F)C(F)(F)C(F)(F)C(F)(F)C(F)(F)C(F)(F)C(F)(F)C(F)(F)C(F)(F)C(F)(F)C(F)(F)C(F)(F)C(F)(F)C(F)(F)C(F)(F)C(F)(F)C(F)(F)C(F)(F)C(F)(F)C(F)(F)C(F)(F)C(F)(F)C(F)(F)C(F)(F)C(F)(F)C(F)(F)C(F)(F)C(F)(F)C(F)(F)C(F)(F)C(F)(F)C(F)(F)C(F)(F)C(F)(F)C(F)(F)C(F)(F)C(F)(F)C(F)(F)C(F)(F)C(F)(F)C(F)(F)C(F)(F)C(F)(F)C(F)(F)C(F)(F)C(F)(F)C(F)(F)C(F)(F)C(F)(F)C(F)(F)C(F)(F)C(F)(F)C(F)(F)C(F)(F)C(F)(F)C(F)(F)C(F)(F)C(F)(F)C(F)(F)C(F)(F)C(F)(F)C(F)(F)C(F)(F)C(F)(F)C(F)(F)C(F)(F)C(F)(F)C(F)(F)C(F)(F)C(F)(F)C(F)(F)C(F)(F)C(F)(F)C(F)(F)C(F)(F)C(F)(F)C(F)(F)C(F)(F)C(F)(F)C(F)(F)C(F)(F)C(F)(F)C(F)(F)C(F)(F)C(F)(F)C(F)(F)C(F)(F)C(F)(F)C(F)(F)C(F)(F)C(F)(F)C(F)(F)C(F)(F)C(F)(F)C(F)(F)C(F)(F)C(F)(F)C(F)(F)C(F)(F)C(F)(F)C(F)(F)C(F)(F)C(F)(F)C(F)(F)C(F)(F)C(F)(F)C(F)(F)C(F)(F)C(F)(F)C(F)(F)C(F)(F)C(F)(F)C(F)(F)C(F)(F)C(F)(F)C(F)(F)C(F)(F)C(F)(F)C(F)(F)C(F)(F)C(F)(F)C(F)(F)C(F)(F)C(F)(F)C(F)(F)C(F)(F)C(F)(F)C(F)(F)C(F)(F)C(F)(F)C(F)(F)C(F)(F)C(F)(F)C(F)(F)C(F)(F)C(F)(F)C(F)(F)C(F)(F)C(F)(F)C(F)(F)C(F)(F)C(F)(F)C(F)(F)C(F)(F)C(F)(F)C(F)(F)C(F)(F)C(F)(F)C(F)(F)C(F)(F)C(F)(F)C(F)(F)C(F)(F)C(F)(F)C(F)(F)C(F)(F)C(F)(F)C(F)(F)C(F)(F)C(F)(F)C(F)(F)C(F)(F)C(F)(F)C(F)(F)C(F)(F)C(F)(F)C(F)(F)C(F)(F)C(F)(F)C(F)(F)C(F)(F)C(F)(F)C(F)(F)C(F)(F)C(F)(F)C(F)(F)C(F)(F)C(F)(F)C(F)(F)C(F)(F)C(F)(F)C(F)(F)C(F)(F)C(F)(F)C(F)(F)C(F)(F)C(F)(F)C(F)(F)C(F)(F)C(F)(F)C(F)(F)C(F)(F)C(F)(F)C(F)(F)C(F)(F)C(F)(F)C(F)(F)C(F)(F)C(F)(F)C(F)(F)C(F)(F)C(F)(F)C(F)(F)C(F)(F)C(F)(F)C(F)(F)C(F)(F)C(F)(F)C(F)(F)C(F)(F)C(F)(F)C(F)(F)C(F)(F)C(F)(F)C(F)(F)C(F)(F)C(F)(F)C(F)(F)C(F)(F)C(F)(F)C(F)(F)C(F)(F)C(F)(F)C(F)(F)C(F)(F)C(F)(F)C(F)(F)C(F)(F)C(F)(F)C(F)(F)C(F)(F)C(F)(F)C(F)(F)C(F)(F)C(F)(F)C(F)(F)C(F)(F)C(F)(F)C(F)(F)C(F)(F)C(F)(F)C(F)(F)C(F)(F)C(F)(F)C(F)(F)C(F)(F)C(F)(F)C(F)(F)C(F)(F)C(F)(F)C(F)(F)C(F)(F)C(F)(F)C(F)(F)C(F)(F)C(F)(F)C(F)(F)C(F)(F)C(F)(F)C(F)(F)C(F)(F)C(F)(F)C(F)(F)C(F)(F)C(F)(F)C(F)(F)C(F)(F)C(F)(F)C(F)(F)C(F)(F)C(F)(F)C(F)(F)C(F)(F)C(F)(F)C(F)(F)C(F)(F)C(F)(F)C(F)(F)C(F)(F)C(F)(F)C(F)(F)C(F)(F)C(F)(F)C(F)(F)C(F)(F)C(F)(F)C(F)(F)C(F)(F)C(F)(F)C(F)(F)C(F)(F)C(F)(F)C(F)(F)C(F)(F)C(F)(F)C(F)(F)C(F)(F)C(F)(F)C(F)(F)C(F)(F)C(F)(F)C(F)(F)C(F)(F)C(F)(F)C(F)(F)C(F)(F)C(F)(F)C(F)(F)C(F)(F)C(F)(F)C(F)(F)C(F)(F)C(F)(F)C(F)(F)C(F)(F)C(F)(F)C(F)(F)C(F)(F)C(F)(F)C(F)(F)C(F)(F)C(F)(F)C(F)(F)C(F)(F)C(F)(F)C(F)(F)C(F)(F)C(F)(F)C(F)(F)C(F)(F)C(F)(F)C(F)(F)C(F)(F)C(F)(F)C(F)(F)C(F)(F)C(F)(F)C(F)(F)C(F)(F)C(F)(F)C(F)(F)C(F)(F)C(F)(F)C(F)(F)C(F)(F)C(F)(F)C(F)(F)C(F)(F)C(F)(F)C(F)(F)C(F)(F)C(F)(F)C(F)(F)C(F)(F)C(F)(F)C(F)(F)C(F)(F)C(F)(F)C(F)(F)C(F)(F)C(F)(F)C(F)(F)C(F)(F)C(F)(F)C(F)(F)C(F)(F)C(F)(F)C(F)(F)C(F)(F)C(F)(F)C(F)(F)C(F)(F)C(F)(F)C(F)(F)C(F)(F)C(F)(F)C(F)(F)C(F)(F)C(F)(F)C(F)(F)C(F)(F)C(F)(F)C(F)(F)C(F)(F)C(F)(F)C(F)(F)C(F)(F)C(F)(F)C(F)(F)C(F)(F)C(F)(F)C(F)(F)C(F)(F)C(F)(F)C(F)(F)C(F)(F)C(F)(F)C(F)(F)C(F)(F)C(F)(F)C(F)(F)C(F)(F)C(F)(F)C(F)(F)C(F)(F)C(F)(F)C(F)(F)C(F)(F)C(F)(F)C(F)(F)C(F)(F)C(F)(F)C(F)(F)C(F)(F)C(F)(F)C(F)(F)C(F)(F)C(F)(F)C(F)(F)C(F)(F)C(F)(F)C(F)(F)C(F)(F)C(F)(F)C(F)(F)C(F)(F)C(F)(F)C(F)(F)C(F)(F)C(F)(F)C(F)(F)C(F)(F)C(F)(F)C(F)(F)C(F)(F)C(F)(F)C(F)(F)C(F)(F)C(F)(F)C(F)(F)C(F)(F)C(F)(F)C(F)(F)C(F)(F)C(F)(F)C(F)(F)C(F)(F)C(F)(F)C(F)(F)C(F)(F)C(F)(F)C(F)(F)C(F)(F)C(F)(F)C(F)(F)C(F)(F)C(F)(F)C(F)(F)C(F)(F)C(F)(F)C(F)(F)C(F)(F)C(F)(F)C(F)(F)C(F)(F)C(F)(F)C(F)(F)C(F)(F)C(F)(F)C(F)(F)C(F)(F)C(F)(F)C(F)(F)C(F)(F)C(F)(F)C(F)(F)C(F)(F)C(F)(F)C(F)(F)C(F)(F)C(F)(F)C(F)(F)C(F)(F)C(F)(F)C(F)(F)C(F)(F)C(F)(F)C(F)(F)C(F)(F)C(F)(F)C(F)(F)C(F)(F)C(F)(F)C(F)(F)C(F)(F)C(F)(F)C(F)(F)C(F)(F)C(F)(F)C(F)(F)C(F)(F)C(F)(F)C(F)(F)C(F)(F)C(F)(F)C(F)(F)C(F)(F)C(F)(F)C(F)(F)C(F)(F)C(F)(F)C(F)(F)C(F)(F)C(F)(F)C(F)(F)C(F)(F)C(F)(F)C(F)(F)C(F)(F)C(F)(F)C(F)(F)C(F)(F)C(F)(F)C(F)(F)C(F)(F)C(F)(F)C(F)(F)C(F)(F)C(F)(F)C(F)(F)C(F)(F)C(F)(F)C(F)(F)C(F)(F)C(F)(F)C(F)(F)C(F)(F)C(F)(F)C(F)(F)C(F)(F)C(F)(F)C(F)(F)C(F)(F)C(F)(F)C(F)(F)C(F)(F)C(F)(F)C(F)(F)C(F)(F)C(F)(F)C(F)(F)C(F)(F)C(F)(F)C(F)(F)C(F)(F)C(F)(F)C(F)(F)C(F)(F)C(F)(F)C(F)(F)C(F)(F)C(F)(F)C(F)(F)C(F)(F)C(F)(F)C(F)(F)C(F)(F)C(F)(F)C(F)(F)C(F)(F)C(F)(F)C(F)(F)C(F)(F)C(F)(F)C(F)(F)C(F)(F)C(F)(F)C(F)(F)C(F)(F)C(F)(F)C(F)(F)C(F)(F)C(F)(F)C(F)(F)C(F)(F)C(F)(F)C(F)(F)C(F)(F)C(F)(F)C(F)(F)C(F)(F)C(F)(F)C(F)(F)C(F)(F)C(F)(F)C(F)(F)C(F)(F)C(F)(F)C(F)(F)C(F)(F)C(F)(F)C(F)(F)C(F)(F)C(F)(F)C(F)(F)C(F)(F)C(F)(F)C(F)(F)C(F)(F)C(F)(F)C(F)(F)C(F)(F)C(F)(F)C(F)(F)C(F)(F)C(F)(F)C(F)(F)C(F)(F)C(F)(F)C(F)(F)C(F)(F)C(F)(F)C(F)(F)C(F)(F)C(F)(F)C(F)(F)C(F)(F)C(F)(F)C(F)(F)C(F)(F)C(F)(F)C(F)(F)C(F)(F)C(F)(F)C(F)(F)C(F)(F)C(F)(F)C(F)(F)C(F)(F)C(F)(F)C(F)(F)C(F)(F)C(F)(F)C(F)(F)C(F)(F)C(F)(F)C(F)(F)C(F)(F)C(F)(F)C(F)(F)C(F)(F)C(F)(F)C(F)(F)C(F)(F)C(F)(F)C(F)(F)C(F)(F)C(F)(F)C(F)(F)C(F)(F)C(F)(F)C(F)(F)C(F)(F)C(F)(F)C(F)(F)C(F)(F)C(F)(F)C(F)(F)C(F)(F)C(F)(F)C(F)(F)C(F)(F)C(F)(F)C(F)(F)C(F)(F)C(F)(F)C(F)(F)C(F)(F)C(F)(F)C(F)(F)C(F)(F)C(F)(F)C(F)(F)C(F)(F)C(F)(F)C(F)(F)C(F)(F)C(F)(F)C(F)(F)C(F)(F)C(F)(F)C(F)(F)C(F)(F)C(F)(F)C(F)(F)C(F)(F)C(F)(F)C(F)(F)C(F)(F)C(F)(F)C(F)(F)C(F)(F)C(F)(F)C(F)(F)C(F)(F)C(F)(F)C(F)(F)C(F)(F)C(F)(F)C(F)(F)C(F)(F)C(F)(F)C(F)(F)C(F)(F)C(F)(F)C(F)(F)C(F)(F)C(F)(F)C(F)(F)C |       |       |      |   |    |

|         |                                                                                                                                    |             |                                                                                                       |        |       |      |   |     |
|---------|------------------------------------------------------------------------------------------------------------------------------------|-------------|-------------------------------------------------------------------------------------------------------|--------|-------|------|---|-----|
| QL03946 | Perfluoro-3,6,9-trioxoundecane-1,11-dioic acid                                                                                     | 55621-18-6  | OC(=O)C(F)(F)OC(F)(F)C(F)(F)OC(F)(F)C(F)(F)OC(F)(F)C(O)=O                                             | -8.51  | 41.38 | 2.59 | P | IN  |
| QL03947 | Perfluoro-3,6,9-trioxadecanoic acid                                                                                                | 151772-59-7 | OC(=O)C(F)(F)OC(F)(F)C(F)(F)OC(F)(F)C(F)(F)OC(F)(F)F                                                  | -8.90  | 50.00 | 2.52 | P | IN  |
| QL03948 | Perfluoro-3,6-dioxaoctane-1,8-dioic acid                                                                                           | 55621-21-1  | OC(=O)C(F)(F)OC(F)(F)C(F)(F)OC(F)(F)C(O)=O                                                            | -7.28  | 36.36 | 2.17 | P | IN  |
| QL03949 | Perfluoro-3,6-dioxahепtanoic acid                                                                                                  | 151772-58-6 | OC(=O)C(F)(F)OC(F)(F)C(F)(F)OC(F)(F)F                                                                 | -8.01  | 47.37 | 2.19 | P | IN  |
| QL03950 | 3-Azido-2,3,3-trifluoro-2-(heptafluoropropoxy)propanoic acid                                                                       | 95906-13-1  | OC(=O)C(F)(OC(F)(F)C(F)(F)C(F)(F)C(F)(F)N=[N+]=[N-])                                                  | -7.76  | 43.48 | 2.19 | P | IN  |
| QL03951 | Perfluoro-2,5-dimethyl-3,6-dioxanonanoic acid                                                                                      | 13252-14-7  | OC(=O)C(F)(OC(F)(F)C(F)(OC(F)(F)C(F)(F)C(F)(F)C(F)(F)C(F)(F)F                                         | -8.93  | 54.84 | 2.40 | P | IN  |
| QL03952 | Perfluoro-(2,5,8-trimethyl-3,6,9-trioxadodecanoic)acid                                                                             | 65294-16-8  | OC(=O)C(F)(OC(F)(F)C(F)(OC(F)(F)C(F)(OC(F)(F)C(F)(F)C(F)(F)C(F)(F)C(F)(F)F                            | -9.60  | 56.10 | 2.67 | P | IN  |
| QL03953 | 2,4,4,5,7,7,8,10,10,11,13,13,14,14,15,15,15-Heptadecafluoro-2,5,8,11-tetrakis(trifluoromethyl)-3,6,9,12-tetraoxapentadecanoic acid | 65150-95-0  | OC(=O)C(F)(OC(F)(F)C(F)(OC(F)(F)C(F)(OC(F)(F)C(F)(F)C(F)(F)C(F)(F)C(F)(F)C(F)(F)C(F)(F)F              | -10.40 | 56.86 | 3.01 | P | OUT |
|         | Perfluoro(2,5,8,11,14-pentamethyl-3,6,9,12,15-pentaooxactadecanoic) acid                                                           | 52481-85-3  | OC(=O)C(F)(OC(F)(F)C(F)(OC(F)(F)C(F)(OC(F)(F)C(F)(OC(F)(F)C(F)(F)C(F)(F)C(F)(F)C(F)(F)C(F)(F)C(F)(F)F | -10.84 | 57.38 | 3.19 | P | OUT |
| QL03954 | 3-(Perfluoroisopropyl)-(2E)-difluoropropenoic acid                                                                                 | 103229-89-6 | OC(=O)C(F)=C(/F)C(F)(C(F)(F)F)C(F)(F)F                                                                | -7.11  | 50.00 | 1.71 | P | IN  |
| QL03955 | 2,3,4,4,4-Pentafluoro-3-(trifluoromethyl)butanoic acid                                                                             | 917951-62-3 | OC(=O)C(F)C(F)(C(F)(F)F)C(F)(F)F                                                                      | -6.23  | 47.06 | 1.40 | P | IN  |
| QL03956 | (2Z)-4,4,5,5,6,6,6-Heptafluoro-3-phenylhex-2-enoic acid                                                                            | 154375-43-6 | OC(=O)C=C(c1ccccc1)C(F)(F)C(F)(F)C(F)(F)F                                                             | -6.44  | 25.00 | 2.11 | P | OUT |
| QL03957 | (3,3,4,4,5,5,6,6,7,7,8,8,9,9,10,10,10-heptadecafluorodecyl) hydrogen maleate                                                       | 54950-04-8  | OC(=O)C=C/C(=O)OCCC(F)(F)C(F)(F)C(F)(F)C(F)(F)C(F)(F)C(F)(F)C(F)(F)F                                  | -9.59  | 40.48 | 3.09 | P | IN  |
| QL03959 | 4-[(Heptadecafluorooctyl)oxy]-4-oxobut-2-enoic acid                                                                                | 152682-85-4 | OC(=O)C=CC(=O)OC(F)(F)C(F)(F)C(F)(F)C(F)(F)C(F)(F)C(F)(F)C(F)(F)F                                     | -9.57  | 47.22 | 2.90 | P | IN  |
| QL03960 | (Perfluorooctyl)ethyl hydrogen fumarate                                                                                            | 86130-60-1  | OC(=O)C=CC(=O)OCCC(F)(F)C(F)(F)C(F)(F)C(F)(F)C(F)(F)C(F)(F)C(F)(F)F                                   | -9.59  | 40.48 | 3.09 | P | IN  |
| QL03961 | 4,4,5,5,6,6,6-Heptafluorohex-2-enoic acid                                                                                          | 356-03-6    | OC(=O)C=CC(F)(F)C(F)(F)C(F)(F)F                                                                       | -6.91  | 38.89 | 1.93 | P | IN  |
| QL03962 | 5-[(Heptadecafluorononyl)oxy]-1,3-benzenedicarboxylic acid                                                                         | 96210-37-6  | OC(=O)C1=CC(=CC(OC(F)=C(F)C(F)(F)C(F)(F)C(F)(F)C(F)(F)C(F)(F)C(F)(F)C(F)(F)C(F)(F)C(O)=O              | -9.12  | 38.64 | 2.94 | P | IN  |
| QL03964 | 4-(Heptafluoroisopropyl)benzoic acid                                                                                               | 2396-21-6   | OC(=O)C1=CC=C(C=C1)C(F)(C(F)(F)F)C(F)(F)F                                                             | -6.69  | 29.17 | 2.10 | P | IN  |
| QL03965 | 4-(Heptadecafluorooctyl)benzoic acid                                                                                               | 74701-33-0  | OC(=O)C1=CC=C(C=C1)C(F)(F)C(F)(F)C(F)(F)C(F)(F)C(F)(F)C(F)(F)C(F)(F)F                                 | -9.35  | 43.59 | 2.90 | P | IN  |
| QL03966 | 4-(Nonafluorobutyl)benzoic acid                                                                                                    | 13835-88-6  | OC(=O)C1=CC=C(C=C1)C(F)(F)C(F)(F)C(F)(F)C(F)(F)F                                                      | -7.74  | 33.33 | 2.46 | P | IN  |
| QL03967 | 4-(Heptafluoropropyl)benzoic acid                                                                                                  | 88950-94-1  | OC(=O)C1=CC=C(C=C1)C(F)(F)C(F)(F)C(F)(F)F                                                             | -7.11  | 29.17 | 2.29 | P | OUT |
| QL03968 | 4-[(1,2,3,3,4,4,5,5,6,6,7,7,8,8,9,9,9-Heptadecafluoronon-1-en-1-yl)oxy]benzoic acid                                                | 58253-65-9  | OC(=O)C1=CC=C(OC(F)=C(F)C(F)(F)C(F)(F)C(F)(F)C(F)(F)C(F)(F)C(F)(F)C(F)(F)C(F)(F)C=C1                  | -9.62  | 41.46 | 3.08 | P | IN  |
| QL03969 | 2-[2,3,3,3-Tetrafluoro-2-(trifluoromethyl)propanoyl]benzoic acid                                                                   | 62656-73-9  | OC(=O)C1=CC=CC=C1C(=O)C(F)(C(F)(F)F)C(F)(F)F                                                          | -5.92  | 26.92 | 1.82 | P | OUT |
| QL03970 | 2-[(2,2,3,3,4,4,4-heptafluorobutanoyl)amino]benzoic acid                                                                           | 82422-33-1  | OC(=O)C1=CC=CC=C1NC(=O)C(F)(F)C(F)(F)C(F)(F)F                                                         | -6.68  | 25.00 | 2.21 | P | OUT |
| QL03971 |                                                                                                                                    |             |                                                                                                       |        |       |      |   |     |

|         |                                                                                                                                            |              |                                                                           |       |       |      |   |     |
|---------|--------------------------------------------------------------------------------------------------------------------------------------------|--------------|---------------------------------------------------------------------------|-------|-------|------|---|-----|
| QL03972 | 2-(1,1,2,2-Tetrafluoroethoxy)benzoic acid                                                                                                  | 10008-97-6   | OC(=O)C1=CC=CC=C1OC(F)(F)C(F)F                                            | -5.52 | 18.18 | 1.88 | P | OUT |
| QL03973 | 2,3,5,6-Tetrafluoro-4-(1,1,1,2,3,3,3-heptafluoropropan-2-yl)benzoic acid                                                                   | 20017-56-5   | OC(=O)c1c(F)c(F)c(c(F)c1F)C(F)(C(F)(F)F)C(F)(F)F                          | -7.91 | 45.83 | 2.19 | P | IN  |
| QL03974 | 5-([1,1,1,4,5,5,5-Heptafluoro-3-(1,1,1,2,3,3,3-heptafluoropropan-2-yl)-4-(trifluoromethyl)pent-2-en-2-yl]oxy)benzene-1,3-dicarboxylic acid | 97220-62-7   | OC(=O)c1cc(OC(=C(C(F)(C(F)(F)C(F)(F)F)C(F)(C(F)(F)F)C(F)(F)F)cc(c1)C(O)=O | -7.38 | 38.64 | 2.15 | P | IN  |
| QL03975 | 5-[1,1,2-Trifluoro-2-(heptafluoropropoxy)ethoxy]benzene-1,3-dicarboxylic acid                                                              | 1268707-97-6 | OC(=O)c1cc(OC(F)(F)C(F)OC(F)(F)C(F)(F)C(F)(F)F)cc(c1)C(O)=O               | -7.84 | 28.57 | 2.64 | P | OUT |
| QL03976 | 4-(Pentadecafluoroheptyl)cyclohexane-1-carboxylic acid                                                                                     | 88951-28-4   | OC(=O)C1CCC(CC1)C(F)(F)C(F)(F)C(F)(F)C(F)(F)C(F)(F)C(F)(F)C(F)(F)F        | -8.53 | 35.71 | 2.75 | P | IN  |
| QL03977 | 4-(Tridecafluorohexyl)cyclohexane-1-carboxylic acid                                                                                        | 88951-27-3   | OC(=O)C1CCC(CC1)C(F)(F)C(F)(F)C(F)(F)C(F)(F)C(F)(F)C(F)(F)F               | -8.28 | 33.33 | 2.71 | P | IN  |
| QL03978 | 4-(Undecafluoropentyl)cyclohexane-1-carboxylic acid                                                                                        | 88951-26-2   | OC(=O)C1CCC(CC1)C(F)(F)C(F)(F)C(F)(F)C(F)(F)C(F)(F)F                      | -7.72 | 30.56 | 2.53 | P | OUT |
| QL03979 | 4-(Heptafluoropropyl)cyclohexane-1-carboxylic acid                                                                                         | 88951-29-5   | OC(=O)C1CCC(CC1)C(F)(F)C(F)(F)C(F)(F)F                                    | -6.75 | 23.33 | 2.29 | P | OUT |
| QL03980 | 6-(Heptafluoropropyl)pyridine-3-carboxylic acid                                                                                            | 1105981-44-9 | OC(=O)c1ccc(nc1)C(F)(F)C(F)(F)C(F)(F)F                                    | -7.19 | 30.43 | 2.29 | P | IN  |
| QL03981 | 4-([2,2,3,3,4,4,5,5,6,6,7,7,8,8,8-Pentadecafluorooctyl)amino]benzoic acid                                                                  | 73782-58-8   | OC(=O)c1ccc(NCC(F)(F)C(F)(F)C(F)(F)C(F)(F)C(F)(F)C(F)(F)C(F)(F)F)cc1      | -9.04 | 36.59 | 2.96 | P | IN  |
| QL03982 | 4-([1,1,1,4,5,5,5-Heptafluoro-3-(1,1,1,2,3,3,3-heptafluoropropan-2-yl)-4-(trifluoromethyl)pent-2-en-2-yl]oxy)benzoic acid                  | 65439-50-1   | OC(=O)c1ccc(OC(=C(C(F)(C(F)(F)C(F)(F)F)C(F)(F)C(F)(F)C(F)(F)F)cc1         | -7.89 | 41.46 | 2.30 | P | IN  |
| QL03983 | [(Pentadecafluoroheptyl)oxy]benzoic acid                                                                                                   | 75895-47-5   | OC(=O)c1ccc(OC(F)(F)C(F)(F)C(F)(F)C(F)(F)C(F)(F)C(F)(F)F)cc1              | -9.18 | 40.54 | 2.91 | P | IN  |
| QL03984 | 4-([2,2,3,3,4,4,5,5,6,6,7,7,8,8,8-Pentadecafluorooctyl)oxy]benzoic acid                                                                    | 129560-87-8  | OC(=O)c1ccc(OCC(F)(F)C(F)(F)C(F)(F)C(F)(F)C(F)(F)C(F)(F)F)cc1             | -9.10 | 37.50 | 2.96 | P | IN  |
| QL03985 | 4-(2,2,3,3,4,4-Heptafluorobutoxy)benzoic acid                                                                                              | 129590-24-5  | OC(=O)c1ccc(OCC(F)(F)C(F)(F)C(F)(F)F)cc1                                  | -7.37 | 25.00 | 2.53 | P | OUT |
| QL03986 | [(3,3,4,4,5,5,6,6,7,7,8,8,9,9,10,10,10-Heptadecafluorodecyl)oxy]benzoic acid                                                               | 188034-84-6  | OC(=O)c1ccc(OCCC(F)(F)C(F)(F)C(F)(F)C(F)(F)C(F)(F)C(F)(F)C(F)(F)F)cc1     | -9.45 | 36.96 | 3.13 | P | IN  |
| QL03987 | 3-(1,1,1,2,3,3,3-Heptafluoropropan-2-yl)benzoic acid                                                                                       | 2396-20-5    | OC(=O)c1cccc(c1)C(F)(C(F)(F)F)C(F)(F)F                                    | -6.12 | 29.17 | 1.85 | P | IN  |
| QL03988 | 2-(Nonafluorobutyl)benzoic acid                                                                                                            | 14670-68-9   | OC(=O)c1ccccc1C(F)(F)C(F)(F)C(F)(F)F                                      | -7.06 | 33.33 | 2.16 | P | IN  |
| QL03989 | 2-(Heptafluoropropyl)pyridine-4-carboxylic acid                                                                                            | 20897-65-8   | OC(=O)c1ccnc(c1)C(F)(F)C(F)(F)C(F)(F)F                                    | -6.90 | 30.43 | 2.16 | P | IN  |
| QL03990 | 3,4-Bis(2,2,3,3,4,4,4-heptafluorobutyl)-1H-pyrrole-2,5-dicarboxylic acid                                                                   | 83650-67-3   | OC(=O)c1Nc(C(O)=O)c(CC(F)(F)C(F)(F)C(F)(F)F)c1CC(F)(F)C(F)(F)C(F)(F)F     | -7.80 | 35.00 | 2.44 | P | IN  |
| QL03991 | 4,4,5,5,6,6-Heptafluoro-3-(nitromethyl)hexanoic acid                                                                                       | 7079-86-9    | OC(=O)CC(C[N+](=O)[O-])C(F)(F)C(F)(F)C(F)(F)F                             | -6.13 | 28.00 | 1.89 | P | OUT |











[illegible]

|         |                                                                                                                                                       |             |                                                                                                                             |        |       |      |   |     |
|---------|-------------------------------------------------------------------------------------------------------------------------------------------------------|-------------|-----------------------------------------------------------------------------------------------------------------------------|--------|-------|------|---|-----|
| QL04135 | 1h,1h-perfluoro-3,6,9-trioxatridecan-1-ol                                                                                                             | 317817-24-6 | OCC(F)(F)OC(F)(F)C(F)(F)OC(F)(F)C(F)(F)OC(F)(F)C(F)(F)C(F)(F)F                                                              | -9.90  | 52.78 | 2.89 | P | OUT |
| QL04136 | 1H,1H,11H,11H-Perfluorotetraethylene glycol                                                                                                           | 330562-44-2 | OCC(F)(F)OC(F)(F)C(F)(F)OC(F)(F)C(F)(F)OC(F)(F)CO                                                                           | -8.25  | 38.71 | 2.54 | P | IN  |
| QL04137 | Fluorinated triethylene glycol monomethyl ether                                                                                                       | 147492-57-7 | OCC(F)(F)OC(F)(F)C(F)(F)OC(F)(F)C(F)(F)OC(F)(F)F                                                                            | -8.79  | 48.15 | 2.52 | P | IN  |
| QL04138 | 1H,1H-Nonafluoro-3,6-dioxaheptan-1-ol                                                                                                                 | 330562-43-1 | OCC(F)(F)OC(F)(F)C(F)(F)OC(F)(F)F                                                                                           | -7.89  | 45.00 | 2.21 | P | IN  |
| QL04139 | 2,3,3,3-Tetrafluoro-2-(perfluoropentoxo)propan-1-ol                                                                                                   | 78693-85-3  | OCC(F)(OC(F)(F)C(F)(F)C(F)(F)C(F)(F)C(F)(F)C(F)(F)F                                                                         | -8.45  | 53.57 | 2.22 | P | IN  |
| QL04140 | 2-(Perfluoropropoxy)-1H,1H-perfluoropropanol                                                                                                          | 26537-88-2  | OCC(F)(OC(F)(F)C(F)(F)C(F)(F)F                                                                                              | -7.46  | 50.00 | 1.87 | P | IN  |
| QL04141 | Perfluoro(2-(2-propoxypropoxy)-1H,1H-propan-1-ol)                                                                                                     | 14548-74-4  | OCC(F)(OC(F)(F)C(F)(OC(F)(F)C(F)(F)C(F)(F)C(F)(F)C(F)(F)F                                                                   | -8.86  | 53.13 | 2.42 | P | IN  |
| QL04142 | 2,3,3,3-Tetrafluoro-2-(1,1,2,3,3,3-hexafluoro-2-[1,1,2,3,3,3-hexafluoro-2-(heptafluoropropoxy)propoxy]propan-1-ol                                     | 14620-81-6  | OCC(F)(OC(F)(F)C(F)(OC(F)(F)C(F)(OC(F)(F)C(F)(F)C(F)(F)C(F)(F)C(F)(F)C(F)(F)F                                               | -9.53  | 54.76 | 2.67 | P | IN  |
| QL04143 | 2,4,4,5,7,7,8,10,10,11,13,13,14,14,15,15,15-Heptadecafluoro-2,5,8,11-tetrakis(trifluoromethyl)-3,6,9,12-tetraoxapentadecan-1-ol                       | 141977-66-4 | OCC(F)(OC(F)(F)C(F)(OC(F)(F)C(F)(OC(F)(F)C(F)(OC(F)(F)C(F)(F)C(F)(F)C(F)(F)C(F)(F)C(F)(F)F                                  | -10.35 | 55.77 | 3.01 | P | OUT |
| QL04144 | 2,4,4,5,7,7,8,10,10,11,13,13,14,16,16,17,17,18,18-Icosafluoro-2,5,8,11,14-pentakis(trifluoromethyl)-3,6,9,12,15-pentaaoctadecan-1-ol                  | 27617-34-1  | OCC(F)(OC(F)(F)C(F)(OC(F)(F)C(F)(OC(F)(F)C(F)(OC(F)(F)C(F)(OC(F)(F)C(F)(F)C(F)(F)C(F)(F)C(F)(F)C(F)(F)F                     | -10.79 | 56.45 | 3.19 | P | OUT |
| QL04145 | 2,4,4,5,7,7,8,10,10,11,13,13,14,16,16,17,19,19,20,20,21,21-Tricosafluoro-2,5,8,11,14,17-hexakis(trifluoromethyl)-3,6,9,12,15,18-hexaaxahenicosan-1-ol | 167631-99-4 | OCC(F)(OC(F)(F)C(F)(OC(F)(F)C(F)(OC(F)(F)C(F)(OC(F)(F)C(F)(OC(F)(F)C(F)(OC(F)(F)C(F)(F)C(F)(F)C(F)(F)C(F)(F)C(F)(F)C(F)(F)F | -11.36 | 56.94 | 3.44 | P | OUT |
| QL04147 | 4,5,5,5-Tetrafluoro-2-iodo-4-(trifluoromethyl)pent-2-en-1-ol                                                                                          | 261760-25-2 | OCC(I)=CC(F)(C(F)(F)F)C(F)(F)F                                                                                              | -6.57  | 42.11 | 1.69 | P | IN  |
| QL04149 | 4,4,5,5,6,6,7,7,8,8,9,9,9-Tridecafluoro-2-iodonon-2-en-1-ol                                                                                           | 261761-01-7 | OCC(I)=CC(F)(F)C(F)(F)C(F)(F)C(F)(F)C(F)(F)C(F)(F)F                                                                         | -8.75  | 50.00 | 2.45 | P | IN  |
| QL04150 | 4,4,5,5,6,6,6-heptafluoro-2-iodohex-2-en-1-ol                                                                                                         | 92835-82-0  | OCC(I)=CC(F)(F)C(F)(F)C(F)(F)F                                                                                              | -7.11  | 42.11 | 1.93 | P | IN  |
| QL04152 | 4,5,5,5-Tetrafluoro-2-iodo-4-(trifluoromethyl)pentan-1-ol                                                                                             | 114810-56-9 | OCC(I)CC(F)(C(F)(F)F)C(F)(F)F                                                                                               | -6.32  | 38.10 | 1.69 | P | IN  |
| QL04153 | 4,4,5,5,6,6,7,7,8,9,9,9-dodecafluoro-2-iodo-8-(trifluoromethyl)nonan-1-ol                                                                             | 16083-62-8  | OCC(I)CC(F)(F)C(F)(F)C(F)(F)C(F)(F)C(F)(C(F)(F)F)C(F)(F)F                                                                   | -8.60  | 48.48 | 2.43 | P | IN  |
| QL04154 | 4,4,5,5,6,6,7,7,8,8,9,10,11,11,11-Hexadecafluoro-2-iodo-10-(trifluoromethyl)undecan-1-ol                                                              | 65726-35-4  | OCC(I)CC(F)(F)C(F)(F)C(F)(F)C(F)(F)C(F)(F)C(F)(F)C(F)(F)C(F)(F)C(F)(F)F                                                     | -9.32  | 51.28 | 2.67 | P | IN  |
| QL04155 | 4,4,5,5,6,6,7,7,8,8,9,10,10,11,11,12,12,13,13,14,14,15,15,15-Pentacosafuoro-2-iodopentadecan-1-ol                                                     | 80459-24-1  | OCC(I)CC(F)(F)C(F)(F)C(F)(F)C(F)(F)C(F)(F)C(F)(F)C(F)(F)C(F)(F)C(F)(F)C(F)(F)C(F)(F)C(F)(F)F                                | -10.37 | 54.17 | 3.07 | P | OUT |
| QL04156 | 4,4,5,5,6,6,7,7,8,8,9,10,10,11,11,12,12,13,13,13-Henicosafuoro-2-iodotridecan-1-ol                                                                    | 38550-46-8  | OCC(I)CC(F)(F)C(F)(F)C(F)(F)C(F)(F)C(F)(F)C(F)(F)C(F)(F)C(F)(F)C(F)(F)C(F)(F)C(F)(F)F                                       | -9.86  | 52.38 | 2.89 | P | IN  |
| QL04157 | 4,4,5,5,6,6,7,7,8,8,9,10,10,11,11,11-Heptadecafluoro-2-iodoundecan-1-ol                                                                               | 38550-45-7  | OCC(I)CC(F)(F)C(F)(F)C(F)(F)C(F)(F)C(F)(F)C(F)(F)C(F)(F)C(F)(F)C(F)(F)F                                                     | -9.27  | 50.00 | 2.69 | P | IN  |

[illegible]

|         |                                                                                                   |              |                                                                                                           |        |       |      |   |     |
|---------|---------------------------------------------------------------------------------------------------|--------------|-----------------------------------------------------------------------------------------------------------|--------|-------|------|---|-----|
| QL04178 | Bis(2-hydroxyethyl)ammonium<br>perfluorohexanesulfonate                                           | 70225-16-0   | OCC[NH2+](CCO.[O-]S(=O)(=O)C(F)(F)C(F)(F)C(F)(F)C(F)(F)C(F)(F)F                                           | -7.45  | 30.95 | 2.40 | P | IN  |
| QL04179 | Bis(2-hydroxyethyl)ammonium<br>1,1,2,2,3,3,4,4,5,5,5-<br>undecafluoropentane-1-<br>sulphonate     | 70225-17-1   | OCC[NH2+](CCO.[O-]S(=O)(=O)C(F)(F)C(F)(F)C(F)(F)C(F)(F)C(F)(F)F                                           | -6.63  | 28.21 | 2.11 | P | OUT |
| QL04180 | Bis(2-hydroxyethyl)ammonium<br>perfluorobutanesulfonate                                           | 70225-18-2   | OCC[NH2+](CCO.[O-]S(=O)(=O)C(F)(F)C(F)(F)C(F)(F)C(F)(F)F                                                  | -5.88  | 25.00 | 1.86 | P | OUT |
| QL04181 | 4,4,5,5,6,6,7,7,7-Nonafluorohept-2-<br>yn-1-ol                                                    | 81190-31-0   | OCC#CC(F)(F)C(F)(F)C(F)(F)C(F)(F)F                                                                        | -7.89  | 45.00 | 2.21 | P | IN  |
| QL04182 | (2Z)-4,5,5,5-Tetrafluoro-4-<br>(trifluoromethyl)pent-2-en-1-ol                                    | 83706-99-4   | OCC=C(C(F)(C(F)(F)C(F)(F)F                                                                                | -6.24  | 36.84 | 1.69 | P | IN  |
| QL04183 | (2Z)-4,4,5,5,6,6,7,7,8,8,9,9-<br>Tridecafluoronon-2-en-1-ol                                       | 83707-01-1   | OCC=C(C(F)(F)C(F)(F)C(F)(F)C(F)(F)C(F)(F)C(F)(F)F                                                         | -8.54  | 46.43 | 2.46 | P | IN  |
| QL04184 | (2E)-4,5,5,5-Tetrafluoro-4-<br>(trifluoromethyl)pent-2-en-1-ol                                    | 83706-95-0   | OCC=CC(F)(C(F)(F)C(F)(F)F                                                                                 | -6.24  | 36.84 | 1.69 | P | IN  |
| QL04185 | 4,4,5,5,6,6,7,7,8,8,9,9,10,10,11,11,<br>11-heptadecafluoroundec-2-en-1-<br>ol                     | 2340-84-3    | OCC=CC(F)(F)C(F)(F)C(F)(F)C(F)(F)C(F)(F)C(F)(F)C(F)(F)C(F)(F)F                                            | -9.26  | 50.00 | 2.68 | P | IN  |
| QL04186 | 4,4,5,5,6,6,7,7,8,8,9,9-<br>Tridecafluoro-2-nonen-1-ol                                            | 38550-47-9   | OCC=CC(F)(F)C(F)(F)C(F)(F)C(F)(F)C(F)(F)C(F)(F)F                                                          | -8.54  | 46.43 | 2.46 | P | IN  |
| QL04189 | 4,4,5,5,6,6,7,7,7-Nonafluorohept-2-<br>en-1-ol                                                    | 72016-05-8   | OCC=CC(F)(F)C(F)(F)C(F)(F)C(F)(F)F                                                                        | -7.64  | 40.91 | 2.21 | P | IN  |
| QL04190 | 4,4,5,5,6,6-Heptafluorohex-2-en-<br>1-ol                                                          | 679-03-8     | OCC=CC(F)(F)C(F)(F)C(F)(F)F                                                                               | -6.82  | 36.84 | 1.95 | P | IN  |
| QL04192 | (Perfluorocyclohexyl)methanol<br>[4-<br>(Heptadecafluorooctyl)phenyl]me<br>thanol                 | 28788-68-3   | OCC1(F)C(F)(F)C(F)(F)C(F)(F)C(F)(F)C1(F)F                                                                 | -6.38  | 50.00 | 1.38 | P | IN  |
| QL04193 | [4-<br>(3,3,4,4,5,5,6,6,7,7,8,8,9,9,10,10,1<br>0-<br>Heptadecafluorodecyl)phenyl]met<br>hanol     | 163114-33-8  | OCC1=CC=C(C=C1)C(F)(F)C(F)(F)C(F)(F)C(F)(F)C(F)(F)C(F)(F)C(F)(F)C(F)(F)F                                  | -9.28  | 42.50 | 2.90 | P | IN  |
| QL04194 | [4-<br>(3,3,4,4,5,5,6,6,7,7,8,8,9,9,10,10,1<br>0-<br>Heptadecafluorodecyl)phenyl]met<br>hanol     | 356055-77-1  | OCC1=CC=C(CCC(F)(F)C(F)(F)C(F)(F)C(F)(F)C(F)(F)C(F)(F)C(F)(F)C(F)(F)C(F)(F)C=C1                           | -9.37  | 36.96 | 3.09 | P | IN  |
| QL04195 | 4-<br>(Perfluorohexyl)ethyl)phenylmet<br>hanol                                                    | 356055-76-0  | OCC1=CC=C(CCC(F)(F)C(F)(F)C(F)(F)C(F)(F)C(F)(F)C(F)(F)C(F)(F)C=C1                                         | -8.63  | 32.50 | 2.88 | P | OUT |
| QL04196 | [4-(3,3,4,4,5,5,6,6,6-<br>Nonafluorohexyl)phenyl]methanol                                         | 892154-66-4  | OCC1=CC=C(CCC(F)(F)C(F)(F)C(F)(F)C(F)(F)C(F)(F)C=C1                                                       | -7.80  | 26.47 | 2.68 | P | OUT |
| QL04197 | {4-[(4,4,5,5,6,6,7,7,8,8,9,9,10,10,11,<br>1,11-<br>Heptadecafluoroundecyl)oxy]phe<br>nyl}methanol | 892155-69-0  | OCC1=CC=C(OCCCC(F)(F)C(F)(F)C(F)(F)C(F)(F)C(F)(F)C(F)(F)C(F)(F)C(F)(F)C=C1                                | -9.49  | 34.00 | 3.23 | P | OUT |
| QL04198 | {4-[(4,4,5,5,6,6,7,7,8,8,9,9-<br>Tridecafluorononyl)oxy]phenyl}me<br>thanol                       | 957206-65-4  | OCC1=CC=C(OCCCC(F)(F)C(F)(F)C(F)(F)C(F)(F)C(F)(F)C(F)(F)C(F)(F)C=C1                                       | -8.80  | 29.55 | 3.04 | P | OUT |
| QL04199 | 4-[3-{Perfluorobutyl}-1-<br>propyloxy]benzyl alcohol                                              | 892154-51-7  | OCC1=CC=C(OCCCC(F)(F)C(F)(F)C(F)(F)C(F)(F)C(F)(F)C=C1                                                     | -8.05  | 23.68 | 2.87 | P | OUT |
| QL04200 | {3,4,5-Tris[1,1,2-trifluoro-2-<br>(heptafluoropropoxy)ethoxy]phen<br>yl}methanol                  | 1233312-87-2 | OCC1cc(OC(F)(F)C(F)OC(F)(F)C(F)(F)C(F)(F)F)c(OC(F)(F)C(F)OC(F)(F)C(F)(F)F)c(OC(F)(F)C(F)OC(F)(F)C(F)(F)F) | -10.02 | 44.78 | 3.17 | P | OUT |
| QL04201 | [4-(1,1,1,2,3,3,3-<br>Heptafluoropropan-2-<br>yl)phenyl]methanol                                  | 1137162-24-3 | OCC1ccc(cc1)C(F)(C(F)(F)C(F)(F)F                                                                          | -6.71  | 28.00 | 2.15 | P | OUT |
| QL04202 | 3-(Heptafluoropropyl)pentane-1,5-<br>diol                                                         | 678-93-3     | CCCC(CCO)C(F)(F)C(F)(F)C(F)(F)F                                                                           | -6.02  | 25.00 | 1.92 | P | OUT |
| QL04203 | 2-(Heptadecafluorooctyl)butane-<br>1,4-diol                                                       | 135440-42-5  | CCCC(CO)C(F)(F)C(F)(F)C(F)(F)C(F)(F)C(F)(F)C(F)(F)C(F)(F)F                                                | -8.81  | 42.50 | 2.69 | P | IN  |
| QL04204 | 2(Perfluoro-2-propyl)ethanol                                                                      | 90999-87-4   | OCCC(C(F)(F)C(F)(F)F                                                                                      | -5.77  | 38.89 | 1.42 | P | IN  |



|         |                                                                                                                                                                                                                                                 |                                                                                                               |                                                                                   |        |       |      |   |     |
|---------|-------------------------------------------------------------------------------------------------------------------------------------------------------------------------------------------------------------------------------------------------|---------------------------------------------------------------------------------------------------------------|-----------------------------------------------------------------------------------|--------|-------|------|---|-----|
| QL04205 | 3,3,4,4,5,6,6-Octafluoro-5-(trifluoromethyl)hexan-1-ol                                                                                                                                                                                          | 89076-11-9                                                                                                    | OCCC(F)(F)C(F)(F)C(F)(C(F)(F)F)C(F)(F)F                                           | -7.20  | 45.83 | 1.87 | P | IN  |
| QL04206 | 3,3,4,4,5,5,6,6,7,8,8-Dodecafluoro-7-(trifluoromethyl)octan-1-ol                                                                                                                                                                                | 20015-46-7                                                                                                    | OCCC(F)(F)C(F)(F)C(F)(F)C(F)(C(F)(F)F)C(F)(F)F                                    | -8.23  | 50.00 | 2.22 | P | IN  |
| QL04207 | 2-(Perfluoro-7-methyloctyl)ethanol                                                                                                                                                                                                              | 31200-98-3                                                                                                    | OCCC(F)(F)C(F)(F)C(F)(F)C(F)(F)C(F)(F)C(F)(F)C(F)(F)F                             | -9.02  | 52.78 | 2.50 | P | IN  |
| QL04208 | 3,3,4,4,5,5,6,6,7,7,8,8,9,9,10,10,11,12,12,12-Icosafluoro-11-(trifluoromethyl)dodecan-1-ol                                                                                                                                                      | 194427-39-9                                                                                                   | OCCC(F)(F)C(F)(F)C(F)(F)C(F)(F)C(F)(F)C(F)(F)C(F)(F)C(F)(F)C(F)(F)C(F)(F)F        | -9.66  | 54.76 | 2.73 | P | IN  |
| QL04209 | 3,3,4,4,5,5,6,6,7,7,8,8,9,9,10,10,11,11,12,12,13,13,14,14,15,15,15-Heptacosafuoropentadecan-1-ol                                                                                                                                                | 176676-70-3                                                                                                   | OCCC(F)(F)C(F)(F)C(F)(F)C(F)(F)C(F)(F)C(F)(F)C(F)(F)C(F)(F)C(F)(F)C(F)(F)C(F)(F)F | -10.49 | 56.25 | 3.06 | P | OUT |
| QL04210 | 3,3,4,4,5,5,6,6,7,7,8,8,9,9,10,10,11,11,12,12,13,13,13-Tricosafuorotridecan-1-ol                                                                                                                                                                | 1545-59-1                                                                                                     | OCCC(F)(F)C(F)(F)C(F)(F)C(F)(F)C(F)(F)C(F)(F)C(F)(F)C(F)(F)C(F)(F)C(F)(F)F        | -10.00 | 54.76 | 2.88 | P | OUT |
| QL04212 | 3,3,4,4,5,5,6,6,7,7,8,8,9,9,10,10,11,11,11-Nonadecafluoroundecan-1-ol                                                                                                                                                                           | 87017-97-8                                                                                                    | OCCC(F)(F)C(F)(F)C(F)(F)C(F)(F)C(F)(F)C(F)(F)C(F)(F)C(F)(F)C(F)(F)F               | -9.42  | 52.78 | 2.68 | P | IN  |
| QL04213 | 3,3,4,4,5,5,6,6,7,7,8,8,9,9,9-Pentadecafluorononan-1-ol                                                                                                                                                                                         | 755-02-2                                                                                                      | OCCC(F)(F)C(F)(F)C(F)(F)C(F)(F)C(F)(F)C(F)(F)C(F)(F)F                             | -8.73  | 50.00 | 2.44 | P | IN  |
| QL04214 | 52 Fluorotelomer alcohol                                                                                                                                                                                                                        | 185689-57-0                                                                                                   | OCCC(F)(F)C(F)(F)C(F)(F)C(F)(F)C(F)(F)F                                           | -7.86  | 45.83 | 2.17 | P | IN  |
| QL04216 | 32 Fluorotelomer alcohol                                                                                                                                                                                                                        | 755-40-8                                                                                                      | OCCC(F)(F)C(F)(F)C(F)(F)F                                                         | -6.73  | 38.89 | 1.85 | P | IN  |
| QL04217 | 22 fluorotelomer alcohol                                                                                                                                                                                                                        | 54949-74-5                                                                                                    | OCCC(F)(F)C(F)(F)F                                                                | -5.65  | 33.33 | 1.52 | P | IN  |
| QL04218 | Poly(difluoromethylene), .alpha.-fluoro-.omega.-(2-hydroxyethyl)-, dihydrogen 2-hydroxy-1,2,3-propanetricarboxylate Poly(oxy-1,2-ethanediy), alpha-hydro-omega-hydroxy-, ether with alpha-fluoro-omega-(2-hydroxyethyl)poly(difluoromethyl ene) | (11)  Poly(difluoromethylene), .alpha.-fluoro-.omega.-(2-hydroxyethyl)-<br>65605-56-3  65545-80-4  65530-60-1 | OCCC(F)(F)F                                                                       | -4.82  | 25.00 | 1.38 | P | OUT |
| QL04219 | 5,5,6,6,7,7,8,8,9,9,10,10,10-Tridecafluoro-3-iododecan-1-ol                                                                                                                                                                                     | 16083-68-4                                                                                                    | OCCC(I)CC(F)(F)C(F)(F)C(F)(F)C(F)(F)C(F)(F)C(F)(F)F                               | -8.43  | 42.42 | 2.52 | P | IN  |
| QL04220 | 5,5,6,6,7,7,8,8,8-Nonafluoro-3-iodooctan-1-ol                                                                                                                                                                                                   | 109574-81-4                                                                                                   | OCCC(I)CC(F)(F)C(F)(F)C(F)(F)C(F)(F)F                                             | -7.54  | 37.04 | 2.27 | P | IN  |
| QL04221 | 5,5,6,6,7,7,7-Heptafluoro-3-iodoheptan-1-ol                                                                                                                                                                                                     | 89621-93-2                                                                                                    | OCCC(I)CC(F)(F)C(F)(F)C(F)(F)F                                                    | -7.05  | 33.33 | 2.15 | P | IN  |
| QL04222 | 5,5,6,6,7,7,7-Heptafluoro-4,4-bis(trifluoromethyl)heptan-1-ol                                                                                                                                                                                   | 110254-90-5                                                                                                   | OCCCC(C(F)(F)F)(C(F)(F)F)C(F)(F)C(F)(F)C(F)(F)F                                   | -7.41  | 43.33 | 2.04 | P | IN  |
| QL04223 | 3-(Perfluoroisopropyl)propanol                                                                                                                                                                                                                  | 29819-73-6                                                                                                    | OCCCC(F)(C(F)(F)F)C(F)(F)F                                                        | -6.02  | 33.33 | 1.69 | P | IN  |
| QL04224 | 3-(Perfluorooctyl)propanol                                                                                                                                                                                                                      | 1651-41-8                                                                                                     | OCCCC(F)(F)C(F)(F)C(F)(F)C(F)(F)C(F)(F)C(F)(F)C(F)(F)F                            | -9.09  | 47.22 | 2.68 | P | IN  |
| QL04225 | 73 fluorotelomer alcohol                                                                                                                                                                                                                        | 25600-66-2                                                                                                    | OCCCC(F)(F)C(F)(F)C(F)(F)C(F)(F)C(F)(F)C(F)(F)C(F)(F)F                            | -8.59  | 45.45 | 2.51 | P | IN  |
| QL04226 | 3-(Perfluorohexyl)propanol                                                                                                                                                                                                                      | 80806-68-4                                                                                                    | OCCCC(F)(F)C(F)(F)C(F)(F)C(F)(F)C(F)(F)C(F)(F)F                                   | -8.35  | 43.33 | 2.46 | P | IN  |
| QL04227 | 4,4,5,5,6,6,7,7,8,8,8-Undecafluorooctan-1-ol                                                                                                                                                                                                    | 1404193-88-9                                                                                                  | OCCCC(F)(F)C(F)(F)C(F)(F)C(F)(F)C(F)(F)F                                          | -7.72  | 40.74 | 2.25 | P | IN  |
| QL04228 | 3-(Perfluorobutyl)-1-propanol                                                                                                                                                                                                                   | 83310-97-8                                                                                                    | OCCCC(F)(F)C(F)(F)C(F)(F)C(F)(F)F                                                 | -7.43  | 37.50 | 2.21 | P | IN  |
| QL04229 | 3-(Perfluoropropyl)propanol                                                                                                                                                                                                                     | 679-02-7                                                                                                      | OCCCC(F)(F)C(F)(F)C(F)(F)F                                                        | -6.60  | 33.33 | 1.95 | P | IN  |
| QL04230 | 3-(Perfluoroethyl)propanol                                                                                                                                                                                                                      | NOCAS_869964                                                                                                  | OCCCC(F)(F)C(F)(F)F                                                               | -5.98  | 27.78 | 1.82 | P | OUT |
| QL04231 | 4,5,5,5-Tetrafluoro-4-(heptafluoropropoxy)pentan-1-ol                                                                                                                                                                                           | 243128-41-8                                                                                                   | OCCCC(F)(OC(F)(F)C(F)(F)C(F)(F)C(F)(F)F)C(F)(F)F                                  | -7.57  | 39.29 | 2.22 | P | IN  |

|         |                                                                                                                 |              |                                                                 |
|---------|-----------------------------------------------------------------------------------------------------------------|--------------|-----------------------------------------------------------------|
| QL04232 | 6,6,7,7,8,8,9,10,10,11,11,11-<br>Tridecafluoro-4-iodoundecan-1-ol                                               | 132665-00-0  | OCCCC(I)CC(F)(F)C(F)(F)C(F)(F)C(F)(F)C(F)(F)F                   |
| QL04233 | 5,5,6,6,7,7,8,8,9,10,10,10-<br>Tridecafluorodecan-1-ol                                                          | 39239-79-7   | OCCCCC(F)(F)C(F)(F)C(F)(F)C(F)(F)C(F)(F)F                       |
| QL04234 | 44 Fluorotelomer alcohol                                                                                        | 3792-02-7    | OCCCCC(F)(F)C(F)(F)C(F)(F)C(F)(F)F                              |
| QL04235 | 5,5,6,6,7,7,7-Heptafluoroheptan-1-<br>ol                                                                        | 883543-64-4  | OCCCCC(F)(F)C(F)(F)C(F)(F)F                                     |
| QL04236 | (5E)-7,7,8,8,9,10,10,10-<br>Nonafluoro-5-iododec-5-en-1-ol                                                      | 137648-89-6  | OCCCCC(I)=C/C(F)C(F)(F)C(F)(F)C(F)(F)F                          |
| QL04237 | 6,6,7,7,8,8,9,10,10,11,11,11-<br>Tridecafluoroundecan-1-ol                                                      | 134052-02-1  | OCCCCCC(F)(F)C(F)(F)C(F)(F)C(F)(F)C(F)(F)F                      |
| QL04238 | 6,6,7,7,8,8,9,9,9-Nonafluorononan-<br>1-ol                                                                      | 219557-62-7  | OCCCCCC(F)(F)C(F)(F)C(F)(F)C(F)(F)F                             |
| QL04239 | 7,8,8,8-Tetrafluoro-7-<br>(trifluoromethyl)octan-1-ol                                                           | 220469-13-6  | OCCCCCCC(F)(C(F)(F)C(F)(F)F                                     |
| QL04240 | 7,7,8,8,9,10,10,11,11,12,12,13,1<br>4,14,14-Hexadecafluoro-13-<br>(trifluoromethyl)tetradecan-1-ol              | 390410-82-9  | OCCCCCCC(F)(F)C(F)(F)C(F)(F)C(F)(F)C(F)(F)C(F)(F)C(F)(F)F       |
| QL04241 | 7,7,8,8,9,10,10,11,12,12,13,1<br>3,14,14,14-<br>heptadecafluorotetradecan-1-ol                                  | 129794-54-3  | OCCCCCCC(F)(F)C(F)(F)C(F)(F)C(F)(F)C(F)(F)C(F)(F)C(F)(F)F       |
| QL04242 | 6-(Perfluorohexyl)hexanol                                                                                       | 161981-35-7  | OCCCCCCC(F)(F)C(F)(F)C(F)(F)C(F)(F)C(F)(F)F                     |
| QL04243 | 7,7,8,8,9,10,10,10-<br>nonafluorodecan-1-ol                                                                     | 181042-39-7  | OCCCCCCC(F)(F)C(F)(F)C(F)(F)C(F)(F)F                            |
| QL04244 | 9,9,10,10,11,11,12,12,12-<br>Nonafluoro-7-iodododecan-1-ol                                                      | 172701-28-9  | OCCCCCCC(I)CC(F)(F)C(F)(F)C(F)(F)C(F)(F)F                       |
| QL04245 | 9,9,10,10,11,11,12,12,12-<br>Nonafluorododecan-1-ol                                                             | 133001-14-6  | OCCCCCCCCC(F)(F)C(F)(F)C(F)(F)C(F)(F)F                          |
| QL04246 | 11-(Perfluorooctyl)undec-10-enol                                                                                | 15364-19-9   | OCCCCCCCCC=CC(F)(F)C(F)(F)C(F)(F)C(F)(F)C(F)(F)C(F)(F)C(F)(F)F  |
| QL04247 | 12,12,13,13,14,14,15,15,16,16,17,<br>17,17-Tridecafluoroheptadec-10-<br>en-1-ol                                 | 117543-54-1  | OCCCCCCCCC=CC(F)(F)C(F)(F)C(F)(F)C(F)(F)C(F)(F)C(F)(F)F         |
| QL04249 | 12,12,13,13,14,14,15,15,16,16,17,<br>17,18,18,19,19,19-<br>Heptadecafluorononadecan-1-ol                        | 1512-02-3    | OCCCCCCCCCCC(F)(F)C(F)(F)C(F)(F)C(F)(F)C(F)(F)C(F)(F)C(F)(F)F   |
| QL04250 | 12,12,13,13,14,14,15,15,16,16,17,<br>17,17-Tridecafluoroheptadecan-1-<br>ol                                     | 134052-01-0  | OCCCCCCCCCCC(F)(F)C(F)(F)C(F)(F)C(F)(F)C(F)(F)C(F)(F)F          |
| QL04251 | 12,12,13,13,14,14,15,15,15-<br>Nonafluoropentadecan-1-ol                                                        | 36096-97-6   | OCCCCCCCCCCC(F)(F)C(F)(F)C(F)(F)C(F)(F)F                        |
| QL04252 | 9-[(4,4,5,5,5-<br>Pentafluoropentyl)sulfanyl]nonan-<br>1-ol                                                     | 511545-94-1  | OCCCCCCCCSCCCC(F)(F)C(F)(F)F                                    |
| QL04253 | 6-(2,2,3,3,4,4,4-<br>Heptafluorobutoxy)hexan-1-ol                                                               | 1207481-10-4 | OCCCCCOCC(F)(F)C(F)(F)C(F)(F)F                                  |
| QL04254 | 3-[(1,1,2,2,3,3,4,4,4-<br>Nonafluorobutane-1-<br>sulfonyl)propan-1-ol                                           | 762241-70-3  | OCCCS(=O)(=O)C(F)(F)C(F)(F)C(F)(F)C(F)(F)F                      |
| QL04255 | 3-<br>[(Nonafluorobutyl)sulfanyl]propan-<br>1-ol                                                                | 875628-33-4  | OCCSC(F)(F)C(F)(F)C(F)(F)C(F)(F)F                               |
| QL04256 | 1-Propanol, 3-<br>[(3,3,4,4,5,5,6,6,7,7,8,8,9,10,10,1<br>0-heptadecafluorodecyl)thio]-<br>Isooctanesulfonamide, | 36880-07-6   | OCCCCC(F)(F)C(F)(F)C(F)(F)C(F)(F)C(F)(F)C(F)(F)C(F)(F)F         |
| QL04257 | heptadecafluoro-N,N-bis(2-<br>hydroxyethyl)-                                                                    | 93894-66-7   | OCCN(CCO)[S](=O)(=O)C(F)(F)C(F)(F)C(F)(F)C(F)(F)C(F)(F)C(F)(F)F |

-8.65

38.89

2.72

P

IN

-8.25

39.39

2.52

P

IN

-7.34

33.33

2.28

P

IN

-6.84

29.17

2.17

P

OUT

-7.86

32.26

2.55

P

IN

-8.49

36.11

2.72

P

IN

-7.53

30.00

2.46

P

OUT

-6.34

23.33

2.11

P

OUT

-9.15

39.58

2.92

P

IN

-9.10

37.78

2.95

P

IN

-8.44

33.33

2.78

P

IN

-7.50

27.27

2.52

P

OUT

-7.91

25.64

2.75

P

OUT

-7.71

23.08

2.73

P

OUT

-9.51

29.31

3.37

P

OUT

-8.89

25.00

3.21

P

OUT

-9.45

28.33

3.37

P

OUT

-8.83

24.07

3.21

P

OUT

-8.13

18.75

3.04

P

OUT

-7.68

10.87

3.06

P

OUT

-7.41

20.59

2.67

P

OUT

-7.26

33.33

2.25

P

IN

-7.50

36.00

2.28

P

IN

-9.21

39.53

2.95

P

IN

-8.47

37.78

2.67

P

IN





|         |                                                                                               |             |                                                                                    |        |       |      |   |     |
|---------|-----------------------------------------------------------------------------------------------|-------------|------------------------------------------------------------------------------------|--------|-------|------|---|-----|
| QL04288 | N-ethyl<br>perfluorohexanesulfonamido<br>polyethylene glycol, n=6, m=1                        |             | OCCOCCN(CC)S(=O)(=O)C(F)(F)C(F)(F)C(F)(F)C(F)(F)C(F)(F)F                           | -8.47  | 28.89 | 2.91 | P | OUT |
| QL04289 | N-ethyl<br>perfluoropentanesulfonamido<br>polyethylene glycol, n=5, m=1                       |             | OCCOCCN(CC)S(=O)(=O)C(F)(F)C(F)(F)C(F)(F)C(F)(F)F                                  | -7.97  | 26.19 | 2.76 | P | OUT |
| QL04290 | 2,2,3,3,4,4,5,5,6,6,7,7,8,8,8-Pentadecafluoro-N-[2-(2-hydroxyethoxy)ethyl]octanamide          | 110388-02-8 | OCCOCCNC(=O)C(F)(F)C(F)(F)C(F)(F)C(F)(F)C(F)(F)C(F)(F)F                            | -9.06  | 36.59 | 2.97 | P | IN  |
| QL04291 | 2-[2-(2,2,3,3,4,4,4-Heptafluorobutoxy)ethoxy]ethan-1-ol                                       | 54336-56-0  | OCCOCCOCC(F)(F)C(F)(F)C(F)(F)F                                                     | -7.26  | 24.14 | 2.50 | P | OUT |
| QL04292 | N-ethyl<br>perfluorooctanesulfonamido<br>polyethylene glycol, n=8, m=2                        |             | OCCOCCOCCN(CC)S(=O)(=O)C(F)(F)C(F)(F)C(F)(F)C(F)(F)C(F)(F)C(F)(F)C(F)(F)F          | -9.33  | 29.31 | 3.29 | P | OUT |
| QL04293 | N-ethyl<br>perfluoroheptanesulfonamido<br>polyethylene glycol, n=7, m=2                       |             | OCCOCCOCCN(CC)S(=O)(=O)C(F)(F)C(F)(F)C(F)(F)C(F)(F)C(F)(F)C(F)(F)F                 | -9.12  | 27.27 | 3.25 | P | OUT |
| QL04294 | N-ethyl<br>perfluorohexanesulfonamido<br>polyethylene glycol, n=6, m=2                        |             | OCCOCCOCCN(CC)S(=O)(=O)C(F)(F)C(F)(F)C(F)(F)C(F)(F)C(F)(F)F                        | -8.72  | 25.00 | 3.14 | P | OUT |
| QL04295 | N-ethyl<br>perfluoropentanesulfonamido<br>polyethylene glycol, n=5, m=2                       |             | OCCOCCOCCN(CC)S(=O)(=O)C(F)(F)C(F)(F)C(F)(F)C(F)(F)C(F)(F)F                        | -8.42  | 22.45 | 3.07 | P | OUT |
| QL04296 | N-ethyl<br>perfluorooctanesulfonamido<br>polyethylene glycol, n=8, m=3                        |             | OCCOCCOCCOCCN(CC)S(=O)(=O)C(F)(F)C(F)(F)C(F)(F)C(F)(F)C(F)(F)C(F)(F)C(F)(F)F       | -9.62  | 26.15 | 3.51 | P | OUT |
| QL04297 | N-ethyl<br>perfluoroheptanesulfonamido<br>polyethylene glycol, n=7, m=3                       |             | OCCOCCOCCOCCN(CC)S(=O)(=O)C(F)(F)C(F)(F)C(F)(F)C(F)(F)C(F)(F)C(F)(F)F              | -9.29  | 24.19 | 3.41 | P | OUT |
| QL04298 | N-ethyl<br>perfluorohexanesulfonamido<br>polyethylene glycol, n=6, m=3                        |             | OCCOCCOCCOCCN(CC)S(=O)(=O)C(F)(F)C(F)(F)C(F)(F)C(F)(F)C(F)(F)F                     | -9.04  | 22.03 | 3.36 | P | OUT |
| QL04299 | N-ethyl<br>perfluoropentanesulfonamido<br>polyethylene glycol, n=5, m=3                       |             | OCCOCCOCCOCCN(CC)S(=O)(=O)C(F)(F)C(F)(F)C(F)(F)C(F)(F)C(F)(F)F                     | -8.65  | 19.64 | 3.25 | P | OUT |
| QL04300 | N-ethyl<br>perfluorooctanesulfonamido<br>polyethylene glycol, n=8, m=4                        |             | OCCOCCOCCOCCOCCN(CC)S(=O)(=O)C(F)(F)C(F)(F)C(F)(F)C(F)(F)C(F)(F)C(F)(F)C(F)(F)F    | -9.77  | 23.61 | 3.65 | P | OUT |
| QL04301 | N-ethyl<br>perfluoroheptanesulfonamido<br>polyethylene glycol, n=7, m=4                       |             | OCCOCCOCCOCCOCCN(CC)S(=O)(=O)C(F)(F)C(F)(F)C(F)(F)C(F)(F)C(F)(F)C(F)(F)F           | -9.56  | 21.74 | 3.60 | P | OUT |
| QL04302 | N-ethyl<br>perfluorohexanesulfonamido<br>polyethylene glycol, n=6, m=4                        |             | OCCOCCOCCOCCOCCN(CC)S(=O)(=O)C(F)(F)C(F)(F)C(F)(F)C(F)(F)C(F)(F)C(F)(F)F           | -9.23  | 19.70 | 3.51 | P | OUT |
| QL04303 | N-ethyl<br>perfluoropentanesulfonamido<br>polyethylene glycol, n=5, m=4                       |             | OCCOCCOCCOCCOCCN(CC)S(=O)(=O)C(F)(F)C(F)(F)C(F)(F)C(F)(F)C(F)(F)F                  | -9.00  | 17.46 | 3.47 | P | OUT |
| QL04304 | 16,16,17,17,18,18,19,19,20,20,21,21,22,22,22-Pentadecafluoro-3,6,9,12,15-pentaaxadocosan-1-ol | 93704-25-7  | OCCOCCOCCOCCOCCOC(F)(F)C(F)(F)C(F)(F)C(F)(F)C(F)(F)C(F)(F)C(F)(F)F                 | -9.58  | 25.42 | 3.51 | P | OUT |
| QL04305 | N-ethyl<br>perfluorooctanesulfonamido<br>polyethylene glycol, n=8, m=5                        |             | OCCOCCOCCOCCOCCOCCN(CC)S(=O)(=O)C(F)(F)C(F)(F)C(F)(F)C(F)(F)C(F)(F)C(F)(F)C(F)(F)F | -10.01 | 21.52 | 3.81 | P | OUT |
| QL04306 | N-ethyl<br>perfluoroheptanesulfonamido<br>polyethylene glycol, n=7, m=5                       |             | OCCOCCOCCOCCOCCOCCN(CC)S(=O)(=O)C(F)(F)C(F)(F)C(F)(F)C(F)(F)C(F)(F)C(F)(F)F        | -9.72  | 19.74 | 3.73 | P | OUT |
| QL04307 | N-ethyl<br>perfluorohexanesulfonamido<br>polyethylene glycol, n=6, m=5                        |             | OCCOCCOCCOCCOCCOCCN(CC)S(=O)(=O)C(F)(F)C(F)(F)C(F)(F)C(F)(F)C(F)(F)C(F)(F)F        | -9.52  | 17.81 | 3.70 | P | OUT |

|         |                                                                         |                                                                                                               |        |       |      |   |     |
|---------|-------------------------------------------------------------------------|---------------------------------------------------------------------------------------------------------------|--------|-------|------|---|-----|
| QL04308 | N-ethyl<br>perfluoropentanesulfonamido<br>polyethylene glycol, n=5, m=5 | OCCOCCOCCOCCOCCOCCN(CC)S(=O)(=O)C(F)(F)C(F)(F)C(F)(F)C(F)(F)F                                                 | -9.21  | 15.71 | 3.61 | P | OUT |
| QL04309 | N-ethyl<br>perfluorooctanesulfonamido<br>polyethylene glycol, n=8, m=6  | OCCOCCOCCOCCOCCOCCOCCN(CC)S(=O)(=O)C(F)(F)C(F)(F)C(F)(F)C(F)(F)C(F)(F)C(F)(F)C(F)(F)F                         | -10.15 | 19.77 | 3.92 | P | OUT |
| QL04310 | N-ethyl<br>perfluoroheptanesulfonamido<br>polyethylene glycol, n=7, m=6 | OCCOCCOCCOCCOCCOCCOCCN(CC)S(=O)(=O)C(F)(F)C(F)(F)C(F)(F)C(F)(F)C(F)(F)C(F)(F)F                                | -9.97  | 18.07 | 3.89 | P | OUT |
| QL04311 | N-ethyl<br>perfluorohexanesulfonamido<br>polyethylene glycol, n=6, m=6  | OCCOCCOCCOCCOCCOCCOCCN(CC)S(=O)(=O)C(F)(F)C(F)(F)C(F)(F)C(F)(F)C(F)(F)F                                       | -9.70  | 16.25 | 3.82 | P | OUT |
| QL04312 | N-ethyl<br>perfluoropentanesulfonamido<br>polyethylene glycol, n=5, m=6 | OCCOCCOCCOCCOCCOCCOCCN(CC)S(=O)(=O)C(F)(F)C(F)(F)C(F)(F)C(F)(F)C(F)(F)F                                       | -9.51  | 14.29 | 3.79 | P | OUT |
| QL04313 | N-ethyl<br>perfluorooctanesulfonamido<br>polyethylene glycol, n=8, m=7  | OCCOCCOCCOCCOCCOCCOCCOCCN(CC)S(=O)(=O)C(F)(F)C(F)(F)C(F)(F)C(F)(F)C(F)(F)C(F)(F)C(F)(F)F                      | -10.37 | 18.28 | 4.07 | P | OUT |
| QL04314 | N-ethyl<br>perfluoroheptanesulfonamido<br>polyethylene glycol, n=7, m=7 | OCCOCCOCCOCCOCCOCCOCCOCCN(CC)S(=O)(=O)C(F)(F)C(F)(F)C(F)(F)C(F)(F)C(F)(F)C(F)(F)C(F)(F)F                      | -10.13 | 16.67 | 4.00 | P | OUT |
| QL04315 | N-ethyl<br>perfluorohexanesulfonamido<br>polyethylene glycol, n=6, m=7  | OCCOCCOCCOCCOCCOCCOCCOCCN(CC)S(=O)(=O)C(F)(F)C(F)(F)C(F)(F)C(F)(F)C(F)(F)C(F)(F)F                             | -9.96  | 14.94 | 3.97 | P | OUT |
| QL04316 | N-ethyl<br>perfluoropentanesulfonamido<br>polyethylene glycol, n=5, m=7 | OCCOCCOCCOCCOCCOCCOCCOCCN(CC)S(=O)(=O)C(F)(F)C(F)(F)C(F)(F)C(F)(F)C(F)(F)F                                    | -9.70  | 13.10 | 3.91 | P | OUT |
| QL04317 | N-ethyl<br>perfluorooctanesulfonamido<br>polyethylene glycol, n=8, m=8  | OCCOCCOCCOCCOCCOCCOCCOCCOCCN(CC)S(=O)(=O)C(F)(F)C(F)(F)C(F)(F)C(F)(F)C(F)(F)C(F)(F)C(F)(F)F                   | -10.51 | 17.00 | 4.16 | P | OUT |
| QL04318 | N-ethyl<br>perfluoroheptanesulfonamido<br>polyethylene glycol, n=7, m=8 | OCCOCCOCCOCCOCCOCCOCCOCCOCCN(CC)S(=O)(=O)C(F)(F)C(F)(F)C(F)(F)C(F)(F)C(F)(F)C(F)(F)F                          | -10.36 | 15.46 | 4.14 | P | OUT |
| QL04319 | N-ethyl<br>perfluorohexanesulfonamido<br>polyethylene glycol, n=6, m=8  | OCCOCCOCCOCCOCCOCCOCCOCCOCCN(CC)S(=O)(=O)C(F)(F)C(F)(F)C(F)(F)C(F)(F)C(F)(F)C(F)(F)F                          | -10.12 | 13.83 | 4.08 | P | OUT |
| QL04320 | N-ethyl<br>perfluoropentanesulfonamido<br>polyethylene glycol, n=5, m=8 | OCCOCCOCCOCCOCCOCCOCCOCCOCCN(CC)S(=O)(=O)C(F)(F)C(F)(F)C(F)(F)C(F)(F)C(F)(F)F                                 | -9.97  | 12.09 | 4.06 | P | OUT |
| QL04321 | N-ethyl<br>perfluorooctanesulfonamido<br>polyethylene glycol, n=8, m=9  | OCCOCCOCCOCCOCCOCCOCCOCCOCCOCCN(CC)S(=O)(=O)C(F)(F)C(F)(F)C(F)(F)C(F)(F)C(F)(F)C(F)(F)C(F)(F)F                | -10.71 | 15.89 | 4.29 | P | OUT |
| QL04322 | N-ethyl<br>perfluorooctanesulfonamido<br>polyethylene glycol, n=8, m=10 | OCCOCCOCCOCCOCCOCCOCCOCCOCCOCCOCCN(CC)S(=O)(=O)C(F)(F)C(F)(F)C(F)(F)C(F)(F)C(F)(F)C(F)(F)C(F)(F)F             | -10.84 | 14.91 | 4.37 | P | OUT |
| QL04323 | N-ethyl<br>perfluorooctanesulfonamido<br>polyethylene glycol, n=8, m=11 | OCCOCCOCCOCCOCCOCCOCCOCCOCCOCCOCCOCCN(CC)S(=O)(=O)C(F)(F)C(F)(F)C(F)(F)C(F)(F)C(F)(F)C(F)(F)C(F)(F)F          | -11.03 | 14.05 | 4.48 | P | OUT |
| QL04324 | N-ethyl<br>perfluorooctanesulfonamido<br>polyethylene glycol, n=8, m=12 | OCCOCCOCCOCCOCCOCCOCCOCCOCCOCCOCCOCCOCCN(CC)S(=O)(=O)C(F)(F)C(F)(F)C(F)(F)C(F)(F)C(F)(F)C(F)(F)C(F)(F)F       | -11.14 | 13.28 | 4.55 | P | OUT |
| QL04325 | N-ethyl<br>perfluorooctanesulfonamido<br>polyethylene glycol, n=8, m=13 | OCCOCCOCCOCCOCCOCCOCCOCCOCCOCCOCCOCCOCCOCCN(CC)S(=O)(=O)C(F)(F)C(F)(F)C(F)(F)C(F)(F)C(F)(F)C(F)(F)C(F)(F)F    | -11.32 | 12.59 | 4.65 | P | OUT |
| QL04326 | N-ethyl<br>perfluorooctanesulfonamido<br>polyethylene glycol, n=8, m=14 | OCCOCCOCCOCCOCCOCCOCCOCCOCCOCCOCCOCCOCCOCCOCCN(CC)S(=O)(=O)C(F)(F)C(F)(F)C(F)(F)C(F)(F)C(F)(F)C(F)(F)C(F)(F)F | -11.43 | 11.97 | 4.72 | P | OUT |
| QL04327 | 2-(3,3,4,4,5,5,6,6,6-Nonafluorohexane-1-sulfinyl)ethan-1-ol             | 917966-97-3 OCCS(=O)CCC(F)(F)C(F)(F)C(F)(F)C(F)(F)F                                                           | -7.55  | 31.03 | 2.44 | P | IN  |

[illegible]

|         |                                                                                                                                                                                                                                    |                                          |                                                                                             |       |       |      |   |     |
|---------|------------------------------------------------------------------------------------------------------------------------------------------------------------------------------------------------------------------------------------|------------------------------------------|---------------------------------------------------------------------------------------------|-------|-------|------|---|-----|
| QL04348 | 1,3-Propanediol, 2,2-bis[[[gamma-omega-perfluoro-C6-12-alkyl]thio]methyl] derivs., phosphates, ammonium salts                                                                                                                      | 148240-87-3                              | OP(O)(=O)OCC(COP(O)(O)=O)(CSCCC(F)(F)C(F)(F)C(F)(F)C(F)(F)CSCCC(F)(F)C(F)(F)C(F)(F)C(F)(F)F | -8.91 | 26.87 | 3.17 | P | OUT |
| QL04349 | 72 Fluorotelomer dihydrogen phosphate                                                                                                                                                                                              | 37013-72-2                               | OP(O)(=O)OCCC(F)(F)C(F)(F)C(F)(F)C(F)(F)C(F)(F)C(F)(F)C(F)(F)F                              | -8.82 | 42.86 | 2.68 | P | IN  |
| QL04350 | Heptadecafluorooctane-2-sulfonic acid                                                                                                                                                                                              | 927670-12-0                              | OS(=O)(=O)C(F)(C(F)(F)F)C(F)(F)C(F)(F)C(F)(F)C(F)(F)C(F)(F)C(F)(F)F                         | -8.60 | 56.67 | 2.20 | P | IN  |
| QL04351 | Perfluoro-2-(trifluoromethyl)propanesulphonic acid                                                                                                                                                                                 | 93762-09-5                               | OS(=O)(=O)C(F)(F)C(F)(C(F)(F)F)C(F)(F)F                                                     | -6.37 | 50.00 | 1.38 | P | IN  |
| QL04354 | Perfluoro(2-ethoxyethane)sulfonic acid                                                                                                                                                                                             | 113507-82-7                              | OS(=O)(=O)C(F)(F)C(F)(F)OC(F)(F)C(F)(F)F                                                    | -7.34 | 47.37 | 1.89 | P | IN  |
| QL04355 | 1,1,2,2-Tetrafluoroethanesulfonic acid                                                                                                                                                                                             | 464-14-2                                 | OS(=O)(=O)C(F)(F)C(F)F                                                                      | -5.30 | 33.33 | 1.36 | P | IN  |
| QL04356 | 4-[(Nonadecafluorodecenyloxy)benzenesulfonic acid, sodium salt                                                                                                                                                                     | 64910-98-1                               | OS(=O)(=O)C1=CC=C(OC(F)(F)C(F)(F)C(F)(F)C(F)(F)C(F)(F)C(F)(F)C(F)(F)C(F)(F)C(F)=C(F)F)C=C1  | -9.72 | 42.22 | 3.11 | P | IN  |
| QL04357 | Potassium 3,3,4,4,5,5,6,6,7,7,8,8,9,9,10,10,11,11,12,12,12-henicosafuorododecyl sulfate   1H,1H,2H,2H-Perfluorododecanol sulfate ammonium salt                                                                                     | 1262446-14-9   63225-58-1                | OS(=O)(=O)OCCC(F)(F)C(F)(F)C(F)(F)C(F)(F)C(F)(F)C(F)(F)C(F)(F)C(F)(F)C(F)(F)C(F)(F)F        | -9.74 | 48.84 | 2.93 | P | IN  |
| QL04358 | Potassium 1,1,2,2-tetrafluoro-2-[(1,1,1,2,3,3-hexafluoro-3-(pentafluoroethoxy)propan-2-yl)oxy]ethane-1-sulfonate   Ammonium 1,1,2,2-tetrafluoro-2-[(1,1,1,2,3,3-hexafluoro-3-(pentafluoroethoxy)propan-2-yl)oxy]ethane-1-sulfonate | 70755-50-9   93644-65-6                  | OS(=O)(C(F)(C(F)(OC(C(F)(F)F)(C(F)(OC(C(F)(F)F)F)F)F)F)F)=O                                 | -8.80 | 51.72 | 2.43 | P | IN  |
| QL04359 | Potassium perfluoro-p-ethylcyclohexanesulfonate                                                                                                                                                                                    | 335-24-0                                 | OS(=O)(C1(C(F)(C(F)(C(C(F)(C(F)F)F)F)F)C(F)(C1(F)F)F)F)F)=O                                 | -8.45 | 53.57 | 2.22 | P | IN  |
| QL04360 | 4-(Perfluorononyl)oxybenzenesulfonate sodium                                                                                                                                                                                       | 91998-13-9                               | OS(=O)(C1=CC=C(C=C1)OC(F)(C(F)(C(F)(C(F)(C(F)(C(F)(C(F)(C(F)(F)F)F)F)F)F)F)=O               | -9.71 | 43.18 | 3.07 | P | IN  |
| QL04361 | Sodium 5,5,6,6,7,7,8,8,8-nonafluorooctane-1-sulfonate   Potassium 5,5,6,6,7,7,8,8,8-nonafluorooctane-1-sulfonate   Lithium 5,5,6,6,7,7,8,8,8-nonafluorooctane-1-sulfonate                                                          | 65345-91-7   1604816-60-5   1604816-75-2 | OS(=O)(CCCCC(F)(C(F)(C(F)(C(F)F)F)F)F)=O                                                    | -7.43 | 30.00 | 2.42 | P | OUT |
| QL04362 | Potassium 3,3,4,4,5,5,6,6,7,7,8,8,9,9,10,10,10-heptadecafluorodecyl sulfate   1H,1H,2H,2H-Perfluorodecanol sulfate ammonium salt                                                                                                   | 1262446-13-8   63225-57-0                | OS(=O)(OCCC(F)(C(F)(C(F)(C(F)(C(F)(C(F)(C(F)(F)F)F)F)F)F)F)=O                               | -9.12 | 45.95 | 2.73 | P | IN  |
| QL04363 | Tris(2,2,3,3,4,4,5,5-octafluoropentyl) phosphate                                                                                                                                                                                   | 355-86-2                                 | P(=O)(OCC(C(C(C(F)F)F)F)F)F)(OCC(C(C(C(F)F)F)F)F)F)OCC(C(C(C(F)F)F)F)F)F                    | -9.15 | 45.28 | 2.76 | P | IN  |
| QL04364 | Cl-substituted perfluoroalkyl (linear) sulfonic acids_i, n=6                                                                                                                                                                       |                                          | S(=O)(O)(=O)C(F)(Cl)C(F)(F)C(F)(F)C(F)(F)C(F)(F)C(F)(F)F                                    | -8.61 | 55.56 | 2.24 | P | IN  |
| QL04365 | Cl-substituted perfluoroalkyl (linear) sulfonic acids_i, n=4                                                                                                                                                                       |                                          | S(=O)(O)(=O)C(F)(Cl)C(F)(F)C(F)(F)C(F)(F)C(F)(F)F                                           | -7.66 | 52.38 | 1.90 | P | IN  |
| QL04366 | Cl-substituted perfluoroalkyl (linear) sulfonic acids_i, n=3                                                                                                                                                                       |                                          | S(=O)(O)(=O)C(F)(Cl)C(F)(F)C(F)(F)C(F)(F)F                                                  | -7.28 | 50.00 | 1.79 | P | IN  |





|         |                                                                             |             |                                                                                                    |       |       |      |   |     |
|---------|-----------------------------------------------------------------------------|-------------|----------------------------------------------------------------------------------------------------|-------|-------|------|---|-----|
| QL04395 | N-methyl perfluoropentane sulfonamido acetic acid, n=5                      | 159381-10-9 | <chem>S(N(C)CC(O)=O)(=O)=O)C(F)(F)C(F)(F)C(F)(F)C(F)(F)F</chem>                                    | -7.86 | 35.48 | 2.45 | P | IN  |
| QL04396 | N-methyl perfluorobutane sulfonamido acetic acid, n=4                       |             | <chem>S(N(C)CC(O)=O)(=O)=O)C(F)(F)C(F)(F)C(F)(F)F</chem>                                           | -7.18 | 32.14 | 2.24 | P | IN  |
| QL04397 | N-methyl perfluoropropane sulfonamido acetic acid, n=3                      |             | <chem>S(N(C)CC(O)=O)(=O)=O)C(F)(F)C(F)(F)C(F)(F)F</chem>                                           | -6.79 | 28.00 | 2.18 | P | OUT |
| QL04398 | N-methyl perfluoroalkanesulfonamido quaternary ammonium, n=8                |             | <chem>S(N(C)CCC[N+](C)(C)C)(=O)=O)C(F)(F)C(F)(F)C(F)(F)C(F)(F)C(F)(F)C(F)(F)F</chem>               | -8.64 | 30.91 | 2.94 | P | OUT |
| QL04399 | N-methyl perfluoroalkanesulfonamido quaternary ammonium, n=7                |             | <chem>S(N(C)CCC[N+](C)(C)C)(=O)=O)C(F)(F)C(F)(F)C(F)(F)C(F)(F)C(F)(F)C(F)(F)F</chem>               | -8.42 | 28.85 | 2.89 | P | OUT |
| QL04400 | N-methyl perfluoroalkanesulfonamido quaternary ammonium, n=6                |             | <chem>S(N(C)CCC[N+](C)(C)C)(=O)=O)C(F)(F)C(F)(F)C(F)(F)C(F)(F)C(F)(F)F</chem>                      | -7.94 | 26.53 | 2.74 | P | OUT |
| QL04401 | N-methyl perfluoroalkanesulfonamido quaternary ammonium, n=5                |             | <chem>S(N(C)CCC[N+](C)(C)C)(=O)=O)C(F)(F)C(F)(F)C(F)(F)C(F)(F)F</chem>                             | -7.68 | 23.91 | 2.70 | P | OUT |
| QL04402 | N-methyl perfluoroalkanesulfonamido quaternary ammonium, n=4                |             | <chem>S(N(C)CCC[N+](C)(C)C)(=O)=O)C(F)(F)C(F)(F)C(F)(F)C(F)(F)F</chem>                             | -7.10 | 20.93 | 2.52 | P | OUT |
| QL04403 | N-methyl perfluoroalkanesulfonamido quaternary ammonium, n=3                |             | <chem>S(N(C)CCC[N+](C)(C)C)(=O)=O)C(F)(F)C(F)(F)C(F)(F)F</chem>                                    | -6.73 | 17.50 | 2.45 | P | OUT |
| QL04404 | N-methyl perfluoroalkanesulfonamido quaternary ammonium, n=2                |             | <chem>S(N(C)CCC[N+](C)(C)C)(=O)=O)C(F)(F)C(F)(F)F</chem>                                           | -6.01 | 13.51 | 2.23 | P | OUT |
| QL04405 | perfluoroalkanesulfonamido sulfonate betaine D, n=6                         |             | <chem>S(N(C)CCC[N+](CCCS(=O)(O)=O)(C)C)(=O)=O)C(F)(F)C(F)(F)C(F)(F)C(F)(F)C(F)(F)F</chem>          | -8.47 | 22.03 | 3.11 | P | OUT |
| QL04406 | perfluoroalkanesulfonamido sulfonate betaine D, n=5                         |             | <chem>S(N(C)CCC[N+](CCCS(=O)(O)=O)(C)C)(=O)=O)C(F)(F)C(F)(F)C(F)(F)C(F)(F)F</chem>                 | -8.17 | 19.64 | 3.04 | P | OUT |
| QL04407 | perfluoroalkanesulfonamido sulfonate betaine D, n=4                         |             | <chem>S(N(C)CCC[N+](CCCS(=O)(O)=O)(C)C)(=O)=O)C(F)(F)C(F)(F)C(F)(F)F</chem>                        | -7.70 | 16.98 | 2.90 | P | OUT |
| QL04408 | perfluoroalkanesulfonamido sulfonate betaine D, n=3                         |             | <chem>S(N(C)CCC[N+](CCCS(=O)(O)=O)(C)C)(=O)=O)C(F)(F)C(F)(F)C(F)(F)F</chem>                        | -7.38 | 14.00 | 2.84 | P | OUT |
| QL04409 | perfluoroalkanesulfonamido quaternary ammonium dicarboxylate A, n=6         |             | <chem>S(N(CC(O)=O)CCC[N+](CC(O)=O)(C)C)(=O)=O)C(F)(F)C(F)(F)C(F)(F)C(F)(F)C(F)(F)F</chem>          | -8.21 | 23.64 | 2.94 | P | OUT |
| QL04410 | perfluoroalkanesulfonamido quaternary ammonium dicarboxylate A, n=5         |             | <chem>S(N(CC(O)=O)CCC[N+](CC(O)=O)(C)C)(=O)=O)C(F)(F)C(F)(F)C(F)(F)C(F)(F)F</chem>                 | -7.92 | 21.15 | 2.88 | P | OUT |
| QL04411 | perfluoroalkanesulfonamido quaternary ammonium dicarboxylate A, n=4         |             | <chem>S(N(CC(O)=O)CCC[N+](CC(O)=O)(C)C)(=O)=O)C(F)(F)C(F)(F)C(F)(F)F</chem>                        | -7.41 | 18.37 | 2.73 | P | OUT |
| QL04412 | perfluoroalkanesulfonamido quaternary ammonium dicarboxylate A, n=3         |             | <chem>S(N(CC(O)=O)CCC[N+](CC(O)=O)(C)C)(=O)=O)C(F)(F)C(F)(F)C(F)(F)F</chem>                        | -6.91 | 15.22 | 2.59 | P | OUT |
| QL04413 | perfluoroalkanesulfonamido quaternary ammonium sulfonate carboxylate B, n=6 |             | <chem>S(N(CC(O)=O)CCC[N+](CC(O)CS(=O)(O)=O)(C)C)(=O)=O)C(F)(F)C(F)(F)C(F)(F)C(F)(F)C(F)(F)F</chem> | -8.38 | 20.63 | 3.10 | P | OUT |
| QL04414 | perfluoroalkanesulfonamido quaternary ammonium sulfonate carboxylate B, n=5 |             | <chem>S(N(CC(O)=O)CCC[N+](CC(O)CS(=O)(O)=O)(C)C)(=O)=O)C(F)(F)C(F)(F)C(F)(F)C(F)(F)F</chem>        | -8.00 | 18.33 | 3.00 | P | OUT |
| QL04415 | perfluoroalkanesulfonamido quaternary ammonium sulfonate carboxylate B, n=4 |             | <chem>S(N(CC(O)=O)CCC[N+](CC(O)CS(=O)(O)=O)(C)C)(=O)=O)C(F)(F)C(F)(F)C(F)(F)F</chem>               | -7.56 | 15.79 | 2.87 | P | OUT |
| QL04416 | perfluoroalkanesulfonamido quaternary ammonium sulfonate carboxylate B, n=3 |             | <chem>S(N(CC(O)=O)CCC[N+](CC(O)CS(=O)(O)=O)(C)C)(=O)=O)C(F)(F)C(F)(F)C(F)(F)F</chem>               | -7.23 | 12.96 | 2.80 | P | OUT |
| QL04417 | perfluoroalkanesulfonamido quaternary ammonium sulfonate carboxylate A, n=6 |             | <chem>S(N(CC(O)=O)CCC[N+](CCCS(=O)(O)=O)(C)C)(=O)=O)C(F)(F)C(F)(F)C(F)(F)C(F)(F)F</chem>           | -8.39 | 20.97 | 3.10 | P | OUT |

|         |                                                                                   |                                                                                                              |       |       |      |   |     |
|---------|-----------------------------------------------------------------------------------|--------------------------------------------------------------------------------------------------------------|-------|-------|------|---|-----|
| QL04418 | perfluoroalkanesulfonamido<br>quaternary ammonium sulfonate<br>carboxylate A, n=5 | <chem>S(N(CC(O)=O)CCC[N+](CCCC(=O)(O)=O)(C)C)(=O)(=O)C(F)(F)C(F)(F)C(F)(F)C(F)(F)F</chem>                    | -8.02 | 18.64 | 3.00 | P | OUT |
| QL04419 | perfluoroalkanesulfonamido<br>quaternary ammonium sulfonate<br>carboxylate A, n=4 | <chem>S(N(CC(O)=O)CCC[N+](CCCC(=O)(O)=O)(C)C)(=O)(=O)C(F)(F)C(F)(F)C(F)(F)C(F)(F)F</chem>                    | -7.58 | 16.07 | 2.87 | P | OUT |
| QL04420 | perfluoroalkanesulfonamido<br>quaternary ammonium sulfonate<br>carboxylate A, n=3 | <chem>S(N(CC(O)=O)CCC[N+](CCCC(=O)(O)=O)(C)C)(=O)(=O)C(F)(F)C(F)(F)C(F)(F)F</chem>                           | -7.29 | 13.21 | 2.82 | P | OUT |
| QL04421 | perfluoroalkanesulfonamido<br>quaternary ammonium<br>disulfonate B, n=6           | <chem>S(N(CC(O)CS(=O)(O)=O)CCC[N+](CC(O)CS(=O)(O)=O)(C)C)(=O)(=O)C(F)(F)C(F)(F)C(F)(F)C(F)(F)C(F)(F)F</chem> | -8.20 | 18.31 | 3.09 | P | OUT |
| QL04422 | perfluoroalkanesulfonamido<br>quaternary ammonium<br>disulfonate B, n=5           | <chem>S(N(CC(O)CS(=O)(O)=O)CCC[N+](CC(O)CS(=O)(O)=O)(C)C)(=O)(=O)C(F)(F)C(F)(F)C(F)(F)C(F)(F)C(F)(F)F</chem> | -7.82 | 16.18 | 2.98 | P | OUT |
| QL04423 | perfluoroalkanesulfonamido<br>quaternary ammonium<br>disulfonate B, n=4           | <chem>S(N(CC(O)CS(=O)(O)=O)CCC[N+](CC(O)CS(=O)(O)=O)(C)C)(=O)(=O)C(F)(F)C(F)(F)C(F)(F)C(F)(F)F</chem>        | -7.42 | 13.85 | 2.86 | P | OUT |
| QL04424 | perfluoroalkanesulfonamido<br>quaternary ammonium<br>disulfonate B, n=3           | <chem>S(N(CC(O)CS(=O)(O)=O)CCC[N+](CC(O)CS(=O)(O)=O)(C)C)(=O)(=O)C(F)(F)C(F)(F)C(F)(F)F</chem>               | -7.02 | 11.29 | 2.75 | P | OUT |
| QL04425 | perfluoroalkanesulfonamido<br>quaternary ammonium<br>disulfonate B, n=2           | <chem>S(N(CC(O)CS(=O)(O)=O)CCC[N+](CC(O)CS(=O)(O)=O)(C)C)(=O)(=O)C(F)(F)C(F)(F)F</chem>                      | -6.96 | 8.47  | 2.80 | P | OUT |
| QL04426 | perfluoroalkanesulfonamido<br>quaternary diol sulfonic acid, n=6                  | <chem>S(N(CC(O)CS(O)(=O)=O)CCC[N+](CCO)(C)C)(=O)(=O)C(F)(F)C(F)(F)C(F)(F)C(F)(F)C(F)(F)F</chem>              | -7.91 | 20.31 | 2.90 | P | OUT |
| QL04427 | perfluoroalkanesulfonamido<br>quaternary diol sulfonic acid, n=5                  | <chem>S(N(CC(O)CS(O)(=O)=O)CCC[N+](CCO)(C)C)(=O)(=O)C(F)(F)C(F)(F)C(F)(F)C(F)(F)C(F)(F)F</chem>              | -7.61 | 18.03 | 2.83 | P | OUT |
| QL04428 | perfluoroalkanesulfonamido<br>quaternary diol sulfonic acid, n=4                  | <chem>S(N(CC(O)CS(O)(=O)=O)CCC[N+](CCO)(C)C)(=O)(=O)C(F)(F)C(F)(F)C(F)(F)C(F)(F)F</chem>                     | -7.17 | 15.52 | 2.70 | P | OUT |
| QL04429 | perfluoroalkanesulfonamido<br>quaternary diol sulfonic acid, n=3                  | <chem>S(N(CC(O)CS(O)(=O)=O)CCC[N+](CCO)(C)C)(=O)(=O)C(F)(F)C(F)(F)C(F)(F)F</chem>                            | -6.73 | 12.73 | 2.58 | P | OUT |
| QL04430 | N-ethyl perfluorodecane<br>sulfonamido acetic acid, n=10                          | <chem>S(N(CC)CC(O)=O)(=O)(=O)C(F)(F)C(F)(F)C(F)(F)C(F)(F)C(F)(F)C(F)(F)C(F)(F)C(F)(F)C(F)(F)C(F)(F)F</chem>  | -9.40 | 42.86 | 2.95 | P | IN  |
| QL04431 | N-ethyl perfluorononane<br>sulfonamido acetic acid, n=9                           | <chem>S(N(CC)CC(O)=O)(=O)(=O)C(F)(F)C(F)(F)C(F)(F)C(F)(F)C(F)(F)C(F)(F)C(F)(F)C(F)(F)F</chem>                | -9.20 | 41.30 | 2.90 | P | IN  |
| QL04432 | N-ethyl perfluoropropane<br>sulfonamido acetic acid, n=3                          | <chem>S(N(CC)CC(O)=O)(=O)(=O)C(F)(F)C(F)(F)C(F)(F)F</chem>                                                   | -6.60 | 25.00 | 2.18 | P | OUT |
| QL04433 | N-ethyl perfluoroethane<br>sulfonamido acetic acid, n=2                           | <chem>S(N(CC)CC(O)=O)(=O)(=O)C(F)(F)C(F)(F)F</chem>                                                          | -5.72 | 20.00 | 1.92 | P | OUT |
| QL04434 | perfluoroalkanesulfonamido<br>betaine C, n =6                                     | <chem>S(N(CC)CCC[N+](CCC(O)=O)(C)C)(=O)(=O)C(F)(F)C(F)(F)C(F)(F)C(F)(F)C(F)(F)F</chem>                       | -8.42 | 22.41 | 3.07 | P | OUT |
| QL04435 | perfluoroalkanesulfonamido<br>betaine C, n =5                                     | <chem>S(N(CC)CCC[N+](CCC(O)=O)(C)C)(=O)(=O)C(F)(F)C(F)(F)C(F)(F)C(F)(F)C(F)(F)F</chem>                       | -7.97 | 20.00 | 2.94 | P | OUT |
| QL04436 | perfluoroalkanesulfonamido<br>quaternary ammonium carboxylic<br>acid, n=6         | <chem>S(N(CCC(=O)O)CCC[N+](C)(C)C)(=O)(=O)C(F)(F)C(F)(F)C(F)(F)C(F)(F)C(F)(F)F</chem>                        | -7.78 | 23.64 | 2.75 | P | OUT |
| QL04437 | perfluoroalkanesulfonamido<br>quaternary ammonium carboxylic<br>acid, n=5         | <chem>S(N(CCC(=O)O)CCC[N+](C)(C)C)(=O)(=O)C(F)(F)C(F)(F)C(F)(F)C(F)(F)C(F)(F)F</chem>                        | -7.50 | 21.15 | 2.69 | P | OUT |
| QL04438 | perfluoroalkanesulfonamido<br>quaternary ammonium carboxylic<br>acid, n=4         | <chem>S(N(CCC(=O)O)CCC[N+](C)(C)C)(=O)(=O)C(F)(F)C(F)(F)C(F)(F)C(F)(F)F</chem>                               | -6.94 | 18.37 | 2.52 | P | OUT |
| QL04439 | perfluoroalkanesulfonamido<br>quaternary ammonium carboxylic<br>acid, n=3         | <chem>S(N(CCC(=O)O)CCC[N+](C)(C)C)(=O)(=O)C(F)(F)C(F)(F)C(F)(F)F</chem>                                      | -6.55 | 15.22 | 2.43 | P | OUT |

|         |                                                                               |                                                                                                              |       |       |      |   |     |
|---------|-------------------------------------------------------------------------------|--------------------------------------------------------------------------------------------------------------|-------|-------|------|---|-----|
| QL04440 | perfluoroalkanesulfonamido<br>quaternary ammonium<br>dicarboxylate B, n=6     | <chem>S(N(CCC(O)=O)CCC[N+](CC(O)=O)(C)C(=O)(=O)C(F)(F)C(F)(F)C(F)(F)C(F)(F)C(F)(F)F</chem>                   | -8.14 | 22.41 | 2.95 | P | OUT |
| QL04441 | perfluoroalkanesulfonamido<br>quaternary ammonium<br>dicarboxylate B, n=5     | <chem>S(N(CCC(O)=O)CCC[N+](CC(O)=O)(C)C(=O)(=O)C(F)(F)C(F)(F)C(F)(F)C(F)(F)C(F)(F)F</chem>                   | -7.85 | 20.00 | 2.88 | P | OUT |
| QL04442 | perfluoroalkanesulfonamido<br>quaternary ammonium<br>dicarboxylate B, n=4     | <chem>S(N(CCC(O)=O)CCC[N+](CC(O)=O)(C)C(=O)(=O)C(F)(F)C(F)(F)C(F)(F)C(F)(F)F</chem>                          | -7.28 | 17.31 | 2.70 | P | OUT |
| QL04443 | perfluoroalkanesulfonamido<br>quaternary ammonium<br>dicarboxylate C, n=6     | <chem>S(N(CCC(O)=O)CCC[N+](CCC(O)=O)(C)C(=O)(=O)C(F)(F)C(F)(F)C(F)(F)C(F)(F)C(F)(F)F</chem>                  | -8.34 | 21.31 | 3.06 | P | OUT |
| QL04444 | perfluoroalkanesulfonamido<br>quaternary ammonium<br>dicarboxylate C, n=5     | <chem>S(N(CCC(O)=O)CCC[N+](CCC(O)=O)(C)C(=O)(=O)C(F)(F)C(F)(F)C(F)(F)C(F)(F)C(F)(F)F</chem>                  | -7.83 | 18.97 | 2.90 | P | OUT |
| QL04445 | perfluoroalkanesulfonamido<br>quaternary ammonium<br>dicarboxylate C, n=4     | <chem>S(N(CCC(O)=O)CCC[N+](CCC(O)=O)(C)C(=O)(=O)C(F)(F)C(F)(F)C(F)(F)C(F)(F)F</chem>                         | -7.50 | 16.36 | 2.83 | P | OUT |
| QL04446 | perfluoroalkanesulfonamido<br>quaternary ammonium<br>dicarboxylate C, n=3     | <chem>S(N(CCC(O)=O)CCC[N+](CCC(O)=O)(C)C(=O)(=O)C(F)(F)C(F)(F)C(F)(F)F</chem>                                | -6.97 | 13.46 | 2.67 | P | OUT |
| QL04447 | perfluorooctanesulfonamido<br>amine carboxylic acid B, n=8                    | <chem>S(N(CCC(O)=O)CCCN(C)C(=O)(=O)C(F)(F)C(F)(F)C(F)(F)C(F)(F)C(F)(F)C(F)(F)C(F)(F)F</chem>                 | -8.60 | 29.82 | 2.95 | P | OUT |
| QL04448 | perfluoroheptanesulfonamido<br>amine carboxylic acid B, n=7                   | <chem>S(N(CCC(O)=O)CCCN(C)C(=O)(=O)C(F)(F)C(F)(F)C(F)(F)C(F)(F)C(F)(F)C(F)(F)F</chem>                        | -8.37 | 27.78 | 2.90 | P | OUT |
| QL04449 | perfluorohexanesulfonamido<br>amine carboxylic acid B, n=6                    | <chem>S(N(CCC(O)=O)CCCN(C)C(=O)(=O)C(F)(F)C(F)(F)C(F)(F)C(F)(F)C(F)(F)F</chem>                               | -7.90 | 25.49 | 2.75 | P | OUT |
| QL04450 | perfluoropentanesulfonamido<br>amine carboxylic acid B, n=5                   | <chem>S(N(CCC(O)=O)CCCN(C)C(=O)(=O)C(F)(F)C(F)(F)C(F)(F)C(F)(F)F</chem>                                      | -7.62 | 22.92 | 2.70 | P | OUT |
| QL04451 | perfluorobutanesulfonamido<br>amine carboxylic acid B, n=4                    | <chem>S(N(CCC(O)=O)CCCN(C)C(=O)(=O)C(F)(F)C(F)(F)C(F)(F)F</chem>                                             | -7.05 | 20.00 | 2.52 | P | OUT |
| QL04452 | perfluoropropanesulfonamido<br>amine carboxylic acid B, n=3                   | <chem>S(N(CCC(O)=O)CCCN(C)C(=O)(=O)C(F)(F)C(F)(F)F</chem>                                                    | -6.66 | 16.67 | 2.44 | P | OUT |
| QL04453 | perfluorohexanesulfonamido<br>amine sulfonic acid, n=6                        | <chem>S(N(CCCS(=O)(O)=O)C(CO)CCN(C)C(=O)(=O)C(F)(F)C(F)(F)C(F)(F)C(F)(F)C(F)(F)F</chem>                      | -7.63 | 22.03 | 2.73 | P | OUT |
| QL04454 | perfluoropentanesulfonamido<br>amine sulfonic acid, n=5                       | <chem>S(N(CCCS(=O)(O)=O)C(CO)CCN(C)C(=O)(=O)C(F)(F)C(F)(F)C(F)(F)C(F)(F)F</chem>                             | -7.35 | 19.64 | 2.67 | P | OUT |
| QL04455 | perfluoroalkanesulfonamido<br>quaternary ammonium<br>disulfonate A, n=8       | <chem>S(N(CCCS(=O)(O)=O)CCC[N+](CCCS(=O)(O)=O)(C)C(=O)(=O)C(F)(F)C(F)(F)C(F)(F)C(F)(F)C(F)(F)C(F)(F)F</chem> | -8.80 | 22.67 | 3.24 | P | OUT |
| QL04456 | perfluoroalkanesulfonamido<br>quaternary ammonium<br>disulfonate A, n=7       | <chem>S(N(CCCS(=O)(O)=O)CCC[N+](CCCS(=O)(O)=O)(C)C(=O)(=O)C(F)(F)C(F)(F)C(F)(F)C(F)(F)C(F)(F)F</chem>        | -8.57 | 20.83 | 3.18 | P | OUT |
| QL04457 | perfluoroalkanesulfonamido<br>quaternary ammonium<br>disulfonate A, n=6       | <chem>S(N(CCCS(=O)(O)=O)CCC[N+](CCCS(=O)(O)=O)(C)C(=O)(=O)C(F)(F)C(F)(F)C(F)(F)C(F)(F)C(F)(F)F</chem>        | -8.22 | 18.84 | 3.08 | P | OUT |
| QL04458 | perfluoroalkanesulfonamido<br>quaternary ammonium<br>disulfonate A, n=5       | <chem>S(N(CCCS(=O)(O)=O)CCC[N+](CCCS(=O)(O)=O)(C)C(=O)(=O)C(F)(F)C(F)(F)C(F)(F)C(F)(F)F</chem>               | -7.91 | 16.67 | 3.00 | P | OUT |
| QL04459 | perfluoroalkanesulfonamido<br>quaternary ammonium<br>disulfonate A, n=4       | <chem>S(N(CCCS(=O)(O)=O)CCC[N+](CCCS(=O)(O)=O)(C)C(=O)(=O)C(F)(F)C(F)(F)C(F)(F)F</chem>                      | -7.46 | 14.29 | 2.86 | P | OUT |
| QL04460 | perfluoroalkanesulfonamido<br>quaternary ammonium<br>disulfonate A, n=3       | <chem>S(N(CCCS(=O)(O)=O)CCC[N+](CCCS(=O)(O)=O)(C)C(=O)(=O)C(F)(F)C(F)(F)F</chem>                             | -7.07 | 11.67 | 2.76 | P | OUT |
| QL04461 | perfluoroalkanesulfonamido<br>quaternary ammonium triol<br>sulfonic acid, n=6 | <chem>S(N(CCCS(O)=O)=O)C(CO)CC[N+](CC(CO)O)(C)C(=O)(=O)C(F)(F)C(F)(F)C(F)(F)C(F)(F)C(F)(F)F</chem>           | -8.05 | 18.31 | 3.02 | P | OUT |
| QL04462 | perfluoroalkanesulfonamido<br>quaternary ammonium triol<br>sulfonic acid, n=5 | <chem>S(N(CCCS(O)=O)=O)C(CO)CC[N+](CC(CO)O)(C)C(=O)(=O)C(F)(F)C(F)(F)C(F)(F)C(F)(F)F</chem>                  | -7.70 | 16.18 | 2.92 | P | OUT |

|         |                                                                                 |                                                                                                     |       |       |      |   |     |
|---------|---------------------------------------------------------------------------------|-----------------------------------------------------------------------------------------------------|-------|-------|------|---|-----|
| QL04463 | perfluoroalkanesulfonamido<br>quaternary ammonium triol<br>sulfonic acid, n=4   | <chem>S(N(CCCS(O)(=O)=O)C(CO)CC[N+](CC(CO)O)(C)C)(=O)(=O)C(F)(F)C(F)(F)C(F)(F)F</chem>              | -7.38 | 13.85 | 2.84 | P | OUT |
| QL04464 | perfluoroalkanesulfonamido<br>quaternary ammonium triol<br>sulfonic acid, n=3   | <chem>S(N(CCCS(O)(=O)=O)C(CO)CC[N+](CC(CO)O)(C)C)(=O)(=O)C(F)(F)C(F)(F)C(F)(F)F</chem>              | -6.91 | 11.29 | 2.70 | P | OUT |
| QL04465 | perfluoroalkanesulfonamido<br>quaternary ammonium triol<br>sulfonic acid, n=2   | <chem>S(N(CCCS(O)(=O)=O)C(CO)CC[N+](CC(CO)O)(C)C)(=O)(=O)C(F)(F)C(F)(F)F</chem>                     | -6.76 | 8.47  | 2.71 | P | OUT |
| QL04466 | perfluoroalkanesulfonamido<br>quaternary ammonium alcohol<br>sulfonic acid, n=8 | <chem>S(N(CCCS(O)(=O)=O)CCC[N+](CCO)(C)C)(=O)(=O)C(F)(F)C(F)(F)C(F)(F)C(F)(F)C(F)(F)C(F)(F)F</chem> | -8.58 | 24.64 | 3.08 | P | OUT |
| QL04467 | perfluoroalkanesulfonamido<br>quaternary ammonium alcohol<br>sulfonic acid, n=7 | <chem>S(N(CCCS(O)(=O)=O)CCC[N+](CCO)(C)C)(=O)(=O)C(F)(F)C(F)(F)C(F)(F)C(F)(F)C(F)(F)C(F)(F)F</chem> | -8.36 | 22.73 | 3.04 | P | OUT |
| QL04468 | perfluoroalkanesulfonamido<br>quaternary ammonium alcohol<br>sulfonic acid, n=6 | <chem>S(N(CCCS(O)(=O)=O)CCC[N+](CCO)(C)C)(=O)(=O)C(F)(F)C(F)(F)C(F)(F)C(F)(F)C(F)(F)F</chem>        | -7.93 | 20.63 | 2.90 | P | OUT |
| QL04469 | perfluoroalkanesulfonamido<br>quaternary ammonium alcohol<br>sulfonic acid, n=5 | <chem>S(N(CCCS(O)(=O)=O)CCC[N+](CCO)(C)C)(=O)(=O)C(F)(F)C(F)(F)C(F)(F)C(F)(F)C(F)(F)F</chem>        | -7.64 | 18.33 | 2.83 | P | OUT |
| QL04470 | perfluoroalkanesulfonamido<br>quaternary ammonium alcohol<br>sulfonic acid, n=4 | <chem>S(N(CCCS(O)(=O)=O)CCC[N+](CCO)(C)C)(=O)(=O)C(F)(F)C(F)(F)C(F)(F)C(F)(F)F</chem>               | -7.19 | 15.79 | 2.70 | P | OUT |
| QL04471 | perfluoroalkanesulfonamido<br>quaternary ammonium alcohol<br>sulfonic acid, n=3 | <chem>S(N(CCCS(O)(=O)=O)CCC[N+](CCO)(C)C)(=O)(=O)C(F)(F)C(F)(F)C(F)(F)F</chem>                      | -6.78 | 12.96 | 2.60 | P | OUT |
| QL04472 | perfluoroalkanesulfonamido<br>quaternary ammonium alcohol<br>sulfonic acid, n=2 | <chem>S(N(CCCS(O)(=O)=O)CCC[N+](CCO)(C)C)(=O)(=O)C(F)(F)C(F)(F)F</chem>                             | -6.64 | 9.80  | 2.62 | P | OUT |
| QL04473 | perfluoroalkanesulfonamido<br>sulfonate betaine E, n=6                          | <chem>S(N(CCO)CCC[N+](CC(O)CS(=O)(O)=O)(C)C)(=O)(=O)C(F)(F)C(F)(F)C(F)(F)C(F)(F)C(F)(F)F</chem>     | -8.37 | 20.31 | 3.11 | P | OUT |
| QL04474 | perfluoroalkanesulfonamido<br>sulfonate betaine E, n=5                          | <chem>S(N(CCO)CCC[N+](CC(O)CS(=O)(O)=O)(C)C)(=O)(=O)C(F)(F)C(F)(F)C(F)(F)C(F)(F)F</chem>            | -8.03 | 18.03 | 3.02 | P | OUT |
| QL04475 | perfluoroalkanesulfonamido<br>sulfonate betaine E, n=4                          | <chem>S(N(CCO)CCC[N+](CC(O)CS(=O)(O)=O)(C)C)(=O)(=O)C(F)(F)C(F)(F)C(F)(F)F</chem>                   | -7.56 | 15.52 | 2.88 | P | OUT |
| QL04476 | perfluoroalkanesulfonamido<br>sulfonate betaine E, n=3                          | <chem>S(N(CCO)CCC[N+](CC(O)CS(=O)(O)=O)(C)C)(=O)(=O)C(F)(F)C(F)(F)F</chem>                          | -7.26 | 12.73 | 2.82 | P | OUT |
| QL04477 | perfluoroalkanesulfonamido<br>quaternary ammonium diol B, n=8                   | <chem>S(N(CCO)CCC[N+](CCO)(C)C)(=O)(=O)C(F)(F)C(F)(F)C(F)(F)C(F)(F)C(F)(F)C(F)(F)F</chem>           | -8.80 | 26.98 | 3.12 | P | OUT |
| QL04478 | perfluoroalkanesulfonamido<br>quaternary ammonium diol B, n=7                   | <chem>S(N(CCO)CCC[N+](CCO)(C)C)(=O)(=O)C(F)(F)C(F)(F)C(F)(F)C(F)(F)C(F)(F)C(F)(F)F</chem>           | -8.60 | 25.00 | 3.08 | P | OUT |
| QL04479 | perfluoroalkanesulfonamido<br>quaternary ammonium diol B, n=6                   | <chem>S(N(CCO)CCC[N+](CCO)(C)C)(=O)(=O)C(F)(F)C(F)(F)C(F)(F)C(F)(F)C(F)(F)F</chem>                  | -8.17 | 22.81 | 2.95 | P | OUT |
| QL04480 | perfluoroalkanesulfonamido<br>quaternary ammonium diol B, n=5                   | <chem>S(N(CCO)CCC[N+](CCO)(C)C)(=O)(=O)C(F)(F)C(F)(F)C(F)(F)C(F)(F)F</chem>                         | -7.89 | 20.37 | 2.89 | P | OUT |
| QL04481 | perfluoroalkanesulfonamido<br>quaternary ammonium diol B, n=4                   | <chem>S(N(CCO)CCC[N+](CCO)(C)C)(=O)(=O)C(F)(F)C(F)(F)C(F)(F)F</chem>                                | -7.38 | 17.65 | 2.74 | P | OUT |
| QL04482 | perfluoroalkanesulfonamido<br>quaternary ammonium diol B, n=3                   | <chem>S(N(CCO)CCC[N+](CCO)(C)C)(=O)(=O)C(F)(F)C(F)(F)F</chem>                                       | -6.94 | 14.58 | 2.62 | P | OUT |
| QL04483 | perfluoroalkanesulfonamido<br>quaternary ammonium diol B, n=2                   | <chem>S(N(CCO)CCC[N+](CCO)(C)C)(=O)(=O)C(F)(F)C(F)(F)F</chem>                                       | -6.31 | 11.11 | 2.44 | P | OUT |
| QL04484 | perfluorohexanesulfonamido<br>amine carboxylic acid A, n=6                      | <chem>S(NC(C(O)=O)CCN(C)C)(=O)(=O)C(F)(F)C(F)(F)C(F)(F)C(F)(F)C(F)(F)F</chem>                       | -8.09 | 28.89 | 2.74 | P | OUT |

|         |                                                               |                                                                                      |       |       |      |   |     |
|---------|---------------------------------------------------------------|--------------------------------------------------------------------------------------|-------|-------|------|---|-----|
| QL04485 | perfluoropentanesulfonamido<br>amine carboxylic acid A, n=5   | S(NC(C(O)=O)CCN(C)C)(=O)(=O)C(F)(F)C(F)(F)C(F)(F)C(F)(F)F                            | -7.82 | 26.19 | 2.69 | P | OUT |
| QL04486 | perfluorobutanesulfonamido<br>amine carboxylic acid A, n=4    | S(NC(C(O)=O)CCN(C)C)(=O)(=O)C(F)(F)C(F)(F)C(F)(F)F                                   | -7.23 | 23.08 | 2.52 | P | OUT |
| QL04487 | perfluoroalkanesulfonamido<br>quaternary ammonium triol, n=6  | S(NC(CO)CC[N+](CC(O)CO)(C)C)(=O)(=O)C(F)(F)C(F)(F)C(F)(F)C(F)(F)C(F)(F)F             | -8.37 | 22.41 | 3.05 | P | OUT |
| QL04488 | perfluoroalkanesulfonamido<br>quaternary ammonium triol, n=5  | S(NC(CO)CC[N+](CC(O)CO)(C)C)(=O)(=O)C(F)(F)C(F)(F)C(F)(F)C(F)(F)F                    | -7.97 | 20.00 | 2.94 | P | OUT |
| QL04489 | perfluoroalkanesulfonamido<br>quaternary ammonium triol, n=4  | S(NC(CO)CC[N+](CC(O)CO)(C)C)(=O)(=O)C(F)(F)C(F)(F)C(F)(F)F                           | -7.69 | 17.31 | 2.89 | P | OUT |
| QL04490 | perfluoroalkanesulfonamido<br>quaternary ammonium triol, n=3  | S(NC(CO)CC[N+](CC(O)CO)(C)C)(=O)(=O)C(F)(F)C(F)(F)C(F)(F)F                           | -7.16 | 14.29 | 2.73 | P | OUT |
| QL04491 | perfluoroalkanesulfonamido<br>quaternary ammonium diol A, n=6 | S(NCC(O)C[N+](CCO)(C)C)(=O)(=O)C(F)(F)C(F)(F)C(F)(F)C(F)(F)C(F)(F)F                  | -8.34 | 25.49 | 2.95 | P | OUT |
| QL04492 | perfluoroalkanesulfonamido<br>quaternary ammonium diol A, n=5 | S(NCC(O)C[N+](CCO)(C)C)(=O)(=O)C(F)(F)C(F)(F)C(F)(F)C(F)(F)F                         | -8.00 | 22.92 | 2.87 | P | OUT |
| QL04493 | perfluoroalkanesulfonamido<br>quaternary ammonium diol A, n=4 | S(NCC(O)C[N+](CCO)(C)C)(=O)(=O)C(F)(F)C(F)(F)C(F)(F)F                                | -7.47 | 20.00 | 2.71 | P | OUT |
| QL04494 | perfluoroalkanesulfonamido<br>quaternary ammonium oxide, n=9  | S(NCCC[N+](([O-])(C)C)(=O)(=O)C(F)(F)C(F)(F)C(F)(F)C(F)(F)C(F)(F)C(F)(F)C(F)(F)F     | -9.28 | 36.54 | 3.07 | P | IN  |
| QL04495 | perfluoroalkanesulfonamido<br>quaternary ammonium oxide, n=7  | S(NCCC[N+](([O-])(C)C)(=O)(=O)C(F)(F)C(F)(F)C(F)(F)C(F)(F)C(F)(F)C(F)(F)F            | -8.65 | 32.61 | 2.89 | P | OUT |
| QL04496 | perfluoroalkanesulfonamido<br>quaternary ammonium oxide, n=6  | 30295-56-8 S(NCCC[N+](([O-])(C)C)(=O)(=O)C(F)(F)C(F)(F)C(F)(F)C(F)(F)C(F)(F)F        | -8.16 | 30.23 | 2.74 | P | OUT |
| QL04497 | perfluoroalkanesulfonamido<br>quaternary ammonium oxide, n=5  | S(NCCC[N+](([O-])(C)C)(=O)(=O)C(F)(F)C(F)(F)C(F)(F)C(F)(F)F                          | -7.91 | 27.50 | 2.70 | P | OUT |
| QL04498 | perfluoroalkanesulfonamido<br>quaternary ammonium oxide, n=4  | S(NCCC[N+](([O-])(C)C)(=O)(=O)C(F)(F)C(F)(F)C(F)(F)F                                 | -7.32 | 24.32 | 2.52 | P | OUT |
| QL04499 | perfluoroalkanesulfonamido<br>quaternary ammonium, n=3        | S(NCCC[N+](C)(C)C)(=O)(=O)C(F)(F)C(F)(F)F                                            | -6.75 | 18.92 | 2.42 | P | OUT |
| QL04500 | perfluoroalkanesulfonamido<br>betaine A, n =6                 | S(NCCC[N+](CC(O)=O)(C)C)(=O)(=O)C(F)(F)C(F)(F)C(F)(F)C(F)(F)C(F)(F)F                 | -8.40 | 26.53 | 2.95 | P | OUT |
| QL04501 | perfluoroalkanesulfonamido<br>betaine A, n =5                 | S(NCCC[N+](CC(O)=O)(C)C)(=O)(=O)C(F)(F)C(F)(F)C(F)(F)C(F)(F)F                        | -8.06 | 23.91 | 2.87 | P | OUT |
| QL04502 | perfluoroalkanesulfonamido<br>betaine A, n =4                 | S(NCCC[N+](CC(O)=O)(C)C)(=O)(=O)C(F)(F)C(F)(F)C(F)(F)F                               | -7.53 | 20.93 | 2.71 | P | OUT |
| QL04503 | perfluoroalkanesulfonamido<br>betaine A, n =3                 | S(NCCC[N+](CC(O)=O)(C)C)(=O)(=O)C(F)(F)C(F)(F)F                                      | -7.12 | 17.50 | 2.62 | P | OUT |
| QL04504 | perfluoroalkanesulfonamido<br>sulfonate betaine B, n=9        | S(NCCC[N+](CC(O)CS(=O)(O)=O)(C)C)(=O)(=O)C(F)(F)C(F)(F)C(F)(F)C(F)(F)C(F)(F)C(F)(F)F | -9.50 | 28.79 | 3.38 | P | OUT |
| QL04505 | perfluoroalkanesulfonamido<br>sulfonate betaine B, n=8        | S(NCCC[N+](CC(O)CS(=O)(O)=O)(C)C)(=O)(=O)C(F)(F)C(F)(F)C(F)(F)C(F)(F)C(F)(F)F        | -9.15 | 26.98 | 3.27 | P | OUT |
| QL04506 | perfluoroalkanesulfonamido<br>sulfonate betaine B, n=7        | S(NCCC[N+](CC(O)CS(=O)(O)=O)(C)C)(=O)(=O)C(F)(F)C(F)(F)C(F)(F)C(F)(F)F               | -8.88 | 25.00 | 3.21 | P | OUT |
| QL04507 | perfluoroalkanesulfonamido<br>sulfonate betaine B, n=6        | S(NCCC[N+](CC(O)CS(=O)(O)=O)(C)C)(=O)(=O)C(F)(F)C(F)(F)C(F)(F)F                      | -8.47 | 22.81 | 3.08 | P | OUT |
| QL04508 | perfluoroalkanesulfonamido<br>sulfonate betaine B, n=5        | S(NCCC[N+](CC(O)CS(=O)(O)=O)(C)C)(=O)(=O)C(F)(F)C(F)(F)F                             | -8.16 | 20.37 | 3.01 | P | OUT |
| QL04509 | perfluoroalkanesulfonamido<br>sulfonate betaine B, n=4        | S(NCCC[N+](CC(O)CS(=O)(O)=O)(C)C)(=O)(=O)C(F)(F)C(F)(F)F                             | -7.68 | 17.65 | 2.87 | P | OUT |

|         |                                                                   |                                                                                   |       |       |      |   |     |
|---------|-------------------------------------------------------------------|-----------------------------------------------------------------------------------|-------|-------|------|---|-----|
| QL04510 | perfluoroalkanesulfonamido<br>sulfonate betaine B, n=3            | S(NCCC[N+](CC(O)CS(=O)(O)=O)(C)C)(=O)(=O)C(F)(F)C(F)(F)C(F)(F)F                   | -7.42 | 14.58 | 2.84 | P | OUT |
| QL04511 | perfluoroalkanesulfonamido<br>betaine B, n=6                      | S(NCCC[N+](CCC(O)=O)(C)C)(=O)(=O)C(F)(F)C(F)(F)C(F)(F)C(F)(F)C(F)(F)F             | -8.54 | 25.00 | 3.05 | P | OUT |
| QL04512 | perfluoroalkanesulfonamido<br>betaine B, n=5                      | S(NCCC[N+](CCC(O)=O)(C)C)(=O)(=O)C(F)(F)C(F)(F)C(F)(F)C(F)(F)F                    | -8.08 | 22.45 | 2.92 | P | OUT |
| QL04513 | perfluoroalkanesulfonamido<br>betaine B, n=4                      | S(NCCC[N+](CCC(O)=O)(C)C)(=O)(=O)C(F)(F)C(F)(F)C(F)(F)C(F)(F)F                    | -7.73 | 19.57 | 2.84 | P | OUT |
| QL04514 | perfluoroalkanesulfonamido<br>betaine B, n=3                      | S(NCCC[N+](CCC(O)=O)(C)C)(=O)(=O)C(F)(F)C(F)(F)C(F)(F)F                           | -7.17 | 16.28 | 2.68 | P | OUT |
| QL04515 | perfluoroalkanesulfonamido<br>quaternary ammonium diol C, n=6     | S(NCCC[N+](CCC(O)CO)(C)C)(=O)(=O)C(F)(F)C(F)(F)C(F)(F)C(F)(F)C(F)(F)F             | -8.50 | 22.81 | 3.10 | P | OUT |
| QL04516 | perfluoroalkanesulfonamido<br>quaternary ammonium diol C, n=5     | S(NCCC[N+](CCC(O)CO)(C)C)(=O)(=O)C(F)(F)C(F)(F)C(F)(F)C(F)(F)C(F)(F)F             | -8.19 | 20.37 | 3.03 | P | OUT |
| QL04517 | perfluoroalkanesulfonamido<br>quaternary ammonium diol C, n=4     | S(NCCC[N+](CCC(O)CO)(C)C)(=O)(=O)C(F)(F)C(F)(F)C(F)(F)C(F)(F)F                    | -7.72 | 17.65 | 2.89 | P | OUT |
| QL04518 | perfluoroalkanesulfonamido<br>sulfonate betaine A, n=8            | S(NCCC[N+](CCCS(=O)(O)=O)(C)C)(=O)(=O)C(F)(F)C(F)(F)C(F)(F)C(F)(F)C(F)(F)C(F)(F)F | -9.17 | 27.42 | 3.27 | P | OUT |
| QL04519 | perfluoroalkanesulfonamido<br>sulfonate betaine A, n=7            | S(NCCC[N+](CCCS(=O)(O)=O)(C)C)(=O)(=O)C(F)(F)C(F)(F)C(F)(F)C(F)(F)C(F)(F)F        | -8.91 | 25.42 | 3.21 | P | OUT |
| QL04520 | perfluoroalkanesulfonamido<br>sulfonate betaine A, n=6            | S(NCCC[N+](CCCS(=O)(O)=O)(C)C)(=O)(=O)C(F)(F)C(F)(F)C(F)(F)C(F)(F)C(F)(F)F        | -8.50 | 23.21 | 3.09 | P | OUT |
| QL04521 | perfluoroalkanesulfonamido<br>sulfonate betaine A, n=5            | S(NCCC[N+](CCCS(=O)(O)=O)(C)C)(=O)(=O)C(F)(F)C(F)(F)C(F)(F)C(F)(F)C(F)(F)F        | -8.19 | 20.75 | 3.01 | P | OUT |
| QL04522 | perfluoroalkanesulfonamido<br>sulfonate betaine A, n=4            | S(NCCC[N+](CCCS(=O)(O)=O)(C)C)(=O)(=O)C(F)(F)C(F)(F)C(F)(F)C(F)(F)F               | -7.71 | 18.00 | 2.87 | P | OUT |
| QL04523 | perfluoroalkanesulfonamido<br>sulfonate betaine A, n=3            | S(NCCC[N+](CCCS(=O)(O)=O)(C)C)(=O)(=O)C(F)(F)C(F)(F)C(F)(F)F                      | -7.46 | 14.89 | 2.85 | P | OUT |
| QL04524 | perfluoroalkanesulfonamido<br>sulfonate betaine C, n=6            | S(NCCC[N+](CCCS(=O)(O)=O)(C)CCO)(=O)(=O)C(F)(F)C(F)(F)C(F)(F)C(F)(F)C(F)(F)F      | -8.40 | 21.67 | 3.08 | P | OUT |
| QL04525 | perfluoroalkanesulfonamido<br>sulfonate betaine C, n=5            | S(NCCC[N+](CCCS(=O)(O)=O)(C)CCO)(=O)(=O)C(F)(F)C(F)(F)C(F)(F)C(F)(F)F             | -8.09 | 19.30 | 3.01 | P | OUT |
| QL04526 | perfluoroalkanesulfonamido<br>sulfonate betaine C, n=4            | S(NCCC[N+](CCCS(=O)(O)=O)(C)CCO)(=O)(=O)C(F)(F)C(F)(F)C(F)(F)C(F)(F)F             | -7.61 | 16.67 | 2.87 | P | OUT |
| QL04527 | perfluoroalkanesulfonamido<br>quaternary ammonium alcohol,<br>n=8 | S(NCCC[N+](CCO)(C)C)(=O)(=O)C(F)(F)C(F)(F)C(F)(F)C(F)(F)C(F)(F)C(F)(F)F           | -9.01 | 30.36 | 3.12 | P | OUT |
| QL04528 | perfluoroalkanesulfonamido<br>quaternary ammonium alcohol,<br>n=7 | S(NCCC[N+](CCO)(C)C)(=O)(=O)C(F)(F)C(F)(F)C(F)(F)C(F)(F)C(F)(F)C(F)(F)F           | -8.81 | 28.30 | 3.09 | P | OUT |
| QL04529 | perfluoroalkanesulfonamido<br>quaternary ammonium alcohol,<br>n=6 | S(NCCC[N+](CCO)(C)C)(=O)(=O)C(F)(F)C(F)(F)C(F)(F)C(F)(F)C(F)(F)F                  | -8.38 | 26.00 | 2.95 | P | OUT |
| QL04530 | perfluoroalkanesulfonamido<br>quaternary ammonium alcohol,<br>n=5 | S(NCCC[N+](CCO)(C)C)(=O)(=O)C(F)(F)C(F)(F)C(F)(F)C(F)(F)C(F)(F)F                  | -8.04 | 23.40 | 2.87 | P | OUT |
| QL04531 | perfluoroalkanesulfonamido<br>quaternary ammonium alcohol,<br>n=4 | S(NCCC[N+](CCO)(C)C)(=O)(=O)C(F)(F)C(F)(F)C(F)(F)C(F)(F)F                         | -7.52 | 20.45 | 2.72 | P | OUT |
| QL04532 | perfluoroalkanesulfonamido<br>quaternary ammonium alcohol,<br>n=3 | S(NCCC[N+](CCO)(C)C)(=O)(=O)C(F)(F)C(F)(F)C(F)(F)F                                | -7.11 | 17.07 | 2.63 | P | OUT |
| QL04533 | perfluoropropanesulfonamido<br>amine, n=2                         | S(NCCC[N+](CCO)(C)C)(=O)(=O)C(F)(F)C(F)(F)F                                       | -6.46 | 13.16 | 2.45 | P | OUT |
| QL04534 | perfluoropropanesulfonamido<br>amine, n=3                         | S(NCCCN(C)C)(=O)(=O)C(F)(F)C(F)(F)C(F)(F)F                                        | -6.95 | 21.21 | 2.44 | P | OUT |
| QL04535 | perfluoropropanesulfonamido<br>sulfonic acid, n=6                 | S(NCCCS(=O)(O)=O)(=O)(=O)C(F)(F)C(F)(F)C(F)(F)C(F)(F)C(F)(F)F                     | -8.41 | 34.21 | 2.74 | P | IN  |

|         |                                                   |                                                                            |  |       |       |      |   |     |
|---------|---------------------------------------------------|----------------------------------------------------------------------------|--|-------|-------|------|---|-----|
| QL04536 | perfluoropropanesulfonamido<br>sulfonic acid, n=5 | <chem>S(NCCCS(=O)(O)=O)(=O)(=O)C(F)(F)C(F)(F)C(F)(F)C(F)(F)C(F)(F)F</chem> |  | -8.15 | 31.43 | 2.70 | P | OUT |
| QL04537 | perfluoropropanesulfonamido<br>sulfonic acid, n=4 | <chem>S(NCCCS(=O)(O)=O)(=O)(=O)C(F)(F)C(F)(F)C(F)(F)C(F)(F)F</chem>        |  | -7.55 | 28.13 | 2.52 | P | OUT |
| QL04538 | perfluoropropanesulfonamido                       | <chem>S(NCCCS(=O)(O)=O)(=O)(=O)C(F)(F)C(F)(F)C(F)(F)F</chem>               |  | -7.07 | 24.14 | 2.42 | P | OUT |
