# Supplementary material for: How the Structure of Per- and Polyfluoroalkyl Substances (PFAS) Influences Their Binding Potency to the Peroxisome Proliferator-Activated and Thyroid Hormone Receptors—An In Silico Screening Study
Source: MDPI journal article supplement (doi:10.3390/molecules28020479), 2023-01-04
Supplement: s1 [file s1]

| ID | NAME         | CAS         | SMILES                                                                     | binding score (calc.)<br>[kcal/mol] | binding score (pred.)<br>[kcal/mol] | X%    | ICR  | split (t/v) | AD (IN/OUT) |
|----|--------------|-------------|----------------------------------------------------------------------------|-------------------------------------|-------------------------------------|-------|------|-------------|-------------|
| 1  | 10:2FTOH     | 865-86-1    | C(CO)C(C(C(C(C(C(C(C(F)(F)F)(F)F)(F)F)(F)F)(F)F)(F)F)(F)F)(F)F)(F)F        | -9.50                               | -9.75                               | 53.85 | 2.73 | V           | IN          |
| 2  | 10:2FTUCA    | 70887-94-4  | C(=C(C(C(C(C(C(C(C(C(F)(F)F)(F)F)(F)F)(F)F)(F)F)(F)F)(F)F)(F)F)(F)F)C(=O)O | -9.60                               | -9.89                               | 55.56 | 2.74 | T           | IN          |
| 3  | 4:2diPAPs    | 135098-69-0 | C(COP(=O)(O)O)CCC(C(C(C(F)(F)F)(F)F)(F)F)(F)F)C(C(C(F)(F)F)(F)F)(F)F       | -8.90                               | -9.43                               | 40.91 | 2.96 | T           | IN          |
| 4  | 4:2FTOH      | 2043-47-2   | C(CO)C(C(C(C(F)(F)F)(F)F)(F)F                                              | -6.70                               | -7.02                               | 42.86 | 1.91 | V           | IN          |
| 5  | 4:2FTS       | 757124-72-4 | C(CS(=O)(=O)O)C(C(C(C(F)(F)F)(F)F)(F)F                                     | -7.50                               | -7.29                               | 37.50 | 2.17 | T           | IN          |
| 6  | 5:3FTCA      | 914637-49-3 | C(C(C(C(C(C(F)(F)F)(F)F)(F)F)(F)F)C(=O)O                                   | -7.90                               | -7.78                               | 42.31 | 2.24 | T           | IN          |
| 7  | 6:2 CI-PFESA | 756426-58-1 | C(C(C(C(F)(F)C)(F)F)(F)F)C(C(C(C(F)(F)S(=O)(=O)O)(F)F)(F)F)(F)F            | -8.60                               | -9.28                               | 54.84 | 2.51 | V           | IN          |
| 8  | 6:2FTOH      | 647-42-7    | C(CO)C(C(C(C(C(F)(F)F)(F)F)(F)F)(F)F)(F)F                                  | -8.50                               | -8.15                               | 48.15 | 2.23 | T           | IN          |
| 9  | 6:2FTS       | 27619-97-2  | C(CS(=O)(=O)O)C(C(C(C(C(C(F)(F)F)(F)F)(F)F)(F)F)(F)F                       | -8.30                               | -8.34                               | 43.33 | 2.44 | T           | IN          |
| 10 | 6:2FTUCA     | 70887-88-6  | C(=C(C(C(C(C(C(F)(F)F)(F)F)(F)F)(F)F)C(=O)O                                | -8.70                               | -8.30                               | 50.00 | 2.24 | T           | IN          |
| 11 | 6:2PAPs      | 57678-01-0  | C(COP(=O)(O)O)C(C(C(C(C(F)(F)F)(F)F)(F)F)(F)F)(F)F                         | -8.80                               | -8.32                               | 40.63 | 2.51 | T           | IN          |
| 12 | 8:2FTOH      | 678-39-7    | C(CO)C(C(C(C(C(C(C(F)(F)F)(F)F)(F)F)(F)F)(F)F)(F)F                         | -9.20                               | -9.03                               | 51.52 | 2.50 | T           | IN          |
| 13 | 8:2FTS       | 39108-34-4  | C(CS(=O)(=O)O)C(C(C(C(C(C(C(F)(F)F)(F)F)(F)F)(F)F)(F)F)(F)F)(F)F           | -9.50                               | -9.18                               | 47.22 | 2.68 | T           | IN          |
| 14 | 8:2FTUCA     | 70887-84-2  | C(=C(C(C(C(C(C(C(F)(F)F)(F)F)(F)F)(F)F)(F)F)C(=O)O                         | -9.80                               | -9.18                               | 53.33 | 2.51 | T           | IN          |
| 15 | EtFOSA       | 4151-50-2   | C(CN(S(=O)(=O)O)C(C(C(C(C(C(C(F)(F)F)(F)F)(F)F)(F)F)(F)F)(F)F              | -9.4                                | -9.09                               | 45.95 | 2.68 | T           | IN          |
| 16 | EtFOSE       | 1691-99-2   | C(CN(CCO)S(=O)(=O)C(C(C(C(C(C(C(F)(F)F)(F)F)(F)F)(F)F)(F)F)(F)F            | -8.40                               | -8.75                               | 38.64 | 2.74 | T           | IN          |
| 17 | FOSA         | 754-91-6    | C(C(C(C(C(F)S(=O)(=O)N)(F)F)(F)F)C(C(C(F)(F)F)(F)F)(F)F)(F)F               | -9.40                               | -9.11                               | 54.84 | 2.44 | V           | IN          |
| 18 | MeFOSA       | 31506-32-8  | C(N(S(=O)(=O)C(C(C(C(C(C(C(F)(F)F)(F)F)(F)F)(F)F)(F)F)(F)F                 | -9.30                               | -8.95                               | 50.00 | 2.51 | V           | IN          |
| 19 | MeFOSE       | 24448-09-7  | C(N(CCO)S(=O)(=O)C(C(C(C(C(C(C(F)(F)F)(F)F)(F)F)(F)F)(F)F)(F)F             | -8.60                               | -8.94                               | 41.46 | 2.74 | T           | IN          |
| 20 | Mhopfca n=6  | -           | C(C(=O)O)OCC(C(C(C(C(C(F)F)(F)F)(F)F)(F)F)(F)F                             | -8.60                               | -8.53                               | 43.33 | 2.52 | T           | IN          |
| 21 | Mhopfca n=7  | -           | C(C(=O)O)OCC(C(C(C(C(C(C(F)F)(F)F)(F)F)(F)F)(F)F)(F)F                      | -8.60                               | -9.11                               | 45.45 | 2.70 | T           | IN          |
| 22 | Mhopfca n=8  | -           | C(C(=O)O)OCC(C(C(C(C(C(C(C(F)F)(F)F)(F)F)(F)F)(F)F)(F)F)(F)F               | -8.90                               | -9.33                               | 47.22 | 2.74 | V           | IN          |
| 23 | PFBA         | 375-22-4    | C(=O)C(C(C(F)F)(F)F)(F)F)O                                                 | -6.20                               | -6.41                               | 50.00 | 1.46 | T           | IN          |
| 24 | PFBS         | 375-73-5    | C(C(C(F)F)S(=O)(=O)O)(F)F)(C(F)F)(F)F                                      | -7.40                               | -7.21                               | 50.00 | 1.79 | T           | IN          |
| 25 | PFCHS        | 2106-55-0   | C1(C(C(C(C(C1(F)F)(F)F)F)S(=O)(=O)O)(F)F)(F)F                              | -6.00                               | -6.43                               | 50.00 | 1.47 | V           | IN          |
| 26 | PFDA         | 335-76-2    | C(=O)C(C(C(C(C(C(C(C(F)F)(F)F)(F)F)(F)F)(F)F)(F)F)(F)F)O                   | -9.40                               | -9.59                               | 59.38 | 2.51 | T           | IN          |
| 27 | PFETs        | 354-88-1    | C(C(F)F)S(=O)(=O)O)(F)F                                                    | -5.20                               | -5.50                               | 41.67 | 1.32 | T           | IN          |
| 28 | PFHpA        | 375-85-9    | C(=O)C(C(C(C(C(C(F)F)(F)F)(F)F)(F)F)(F)F)O                                 | -8.50                               | -8.54                               | 56.52 | 2.16 | V           | IN          |
| 29 | PFHpS        | 375-92-8    | C(C(C(C(F)F)F)(F)F)(F)F)(C(C(C(F)F)S(=O)(=O)O)(F)F)(F)F                    | -9.30                               | -8.67                               | 55.56 | 2.24 | T           | IN          |
| 30 | PFHxA        | 307-24-4    | C(=O)C(C(C(C(C(F)F)(F)F)(F)F)(F)F)O                                        | -7.50                               | -7.81                               | 55.00 | 1.90 | T           | IN          |
| 31 | PFHxPA       | 40143-76-8  | C(C(C(C(F)F)P(=O)(O)O)(F)F)(F)F)(C(C(F)F)F)(F)F                            | -8.80                               | -8.21                               | 52.00 | 2.15 | T           | IN          |
| 32 | PFHxS        | 355-46-4    | C(C(C(C(F)F)S(=O)(=O)O)(F)F)(F)F)(C(C(F)F)F)(F)F                           | -8.50                               | -8.36                               | 54.17 | 2.15 | T           | IN          |
| 33 | PFNA         | 375-95-1    | C(=O)C(C(C(C(C(C(C(C(F)F)(F)F)(F)F)(F)F)(F)F)(F)F)O                        | -9.70                               | -9.39                               | 58.62 | 2.45 | T           | IN          |
| 34 | PFNS         | 68259-12-1  | C(C(C(C(C(F)F)(F)F)(F)F)(F)F)(C(C(C(C(F)F)S(=O)(=O)O)(F)F)(F)F)(F)F        | -9.20                               | -9.46                               | 57.58 | 2.51 | T           | IN          |
| 35 | PFOA         | 335-67-1    | C(=O)C(C(C(C(C(C(C(F)F)(F)F)(F)F)(F)F)(F)F)(F)F)O                          | -8.90                               | -8.82                               | 57.69 | 2.24 | T           | IN          |
| 36 | PFOPA        | 40143-78-0  | C(C(C(C(C(F)F)P(=O)(O)O)(F)F)(F)F)(C(C(C(F)F)F)(F)F)(F)F                   | -8.80                               | -9.11                               | 54.84 | 2.44 | V           | IN          |
| 37 | PFOS         | 1763-23-1   | C(C(C(C(C(F)F)S(=O)(=O)O)(F)F)(F)F)(C(C(C(F)F)(F)F)(F)F)(F)F               | -9.40                               | -9.23                               | 56.67 | 2.44 | T           | IN          |
| 38 | PFPEa        | 2706-90-3   | C(=O)C(C(C(C(F)F)(F)F)(F)F)O                                               | -6.60                               | -7.45                               | 52.94 | 1.81 | T           | IN          |
| 39 | PFPeS        | 2706-91-4   | C(C(C(F)F)(F)F)(C(C(F)F)S(=O)(=O)O)(F)F)(F)F                               | -7.60                               | -7.63                               | 52.38 | 1.90 | V           | IN          |
| 40 | PFPrA        | 422-64-0    | C(=O)C(C(C(F)F)F)O                                                         | -5.40                               | -5.86                               | 45.45 | 1.36 | T           | IN          |
| 41 | PFPrS        | 110676-15-8 | C(C(F)F)(C(F)F)S(=O)(=O)O)(F)F                                             | -6.20                               | -6.16                               | 46.67 | 1.45 | T           | IN          |
| 42 | PFUdA        | 2058-94-8   | C(=O)C(C(C(C(C(C(C(C(C(F)F)(F)F)(F)F)(F)F)(F)F)(F)F)(F)F)O                 | -9.30                               | -10.06                              | 60.00 | 2.69 | T           | IN          |
| 43 | TFA          | 76-05-1     | C(=O)C(F)F)O                                                               | -4.30                               | -4.11                               | 37.50 | 0.86 | T           | OUT         |







[illegible]















|         |                                                                                                                     |              |                                                                                                                       |        |       |      |   |     |
|---------|---------------------------------------------------------------------------------------------------------------------|--------------|-----------------------------------------------------------------------------------------------------------------------|--------|-------|------|---|-----|
| QL00157 | Potassium nonafluoropentanoate                                                                                      | 336-23-2     | [K+].[O-]C(=O)C(F)(F)C(F)(F)C(F)(F)C(F)(F)F                                                                           | -7.97  | 52.94 | 2.02 | P | IN  |
| QL00158 | Potassium heptafluorobutanoate                                                                                      | 2966-54-3    | [K+].[O-]C(=O)C(F)(F)C(F)(F)C(F)(F)F                                                                                  | -7.05  | 50.00 | 1.73 | P | IN  |
| QL00159 | Potassium 2,3,3,3-tetrafluoro-2-(heptafluoropropoxy)propionate                                                      | 67118-55-2   | [K+].[O-]C(=O)C(F)(OC(F)(F)C(F)(F)C(F)(F)C(F)F                                                                        | -7.96  | 52.38 | 2.03 | P | IN  |
| QL00160 | Perfluoro-2-[3-methoxypropoxy]propanoic acid potassium salt                                                         | 496805-64-2  | [K+].[O-]C(=O)C(F)(OC(F)(F)C(F)(F)C(F)(F)OC(F)(F)C(F)(F)F                                                             | -8.68  | 52.00 | 2.34 | P | IN  |
| QL00161 | Potassium 2,3,3,3-tetrafluoro-2-[1,1,2,3,3,3-hexafluoro-2-(heptafluoropropoxy)propoxy]propionate                    | 67118-57-4   | [K+].[O-]C(=O)C(F)(OC(F)(F)C(F)(F)C(F)(F)C(F)(F)C(F)(F)C(F)(F)F                                                       | -9.33  | 54.84 | 2.53 | P | IN  |
| QL00162 | Potassium 2,3,4,5-tetrachloro-6-[[[3-[[[(heptafluorooctyl)sulphonyl]oxy]phenyl]amino]carbonyl]benzoate              | 57589-85-2   | [K+].[O-]C(=O)c1c(Cl)c(Cl)c(Cl)c1C(=O)Nc2cccc(OS(=O)(=O)C(F)(F)C(F)(F)C(F)(F)C(F)(F)C(F)(F)C(F)(F)C(F)(F)F)c2         | -10.23 | 36.84 | 3.40 | P | OUT |
| QL00163 | Potassium 2,3,4,5-tetrachloro-6-[[[3-[[[pentadecafluoroheptyl)sulphonyl]oxy]phenyl]amino]carbonyl]benzoate          | 68541-01-5   | [K+].[O-]C(=O)c1c(Cl)c(Cl)c(Cl)c1C(=O)Nc2cccc(OS(=O)(=O)C(F)(F)C(F)(F)C(F)(F)C(F)(F)C(F)(F)C(F)(F)C(F)(F)F)c2         | -9.90  | 35.19 | 3.31 | P | OUT |
| QL00164 | Potassium 2,3,4,5-tetrachloro-6-[[[3-[[[tridecafluorohexyl)sulphonyl]oxy]phenyl]amino]carbonyl]benzoate             | 68815-72-5   | [K+].[O-]C(=O)c1c(Cl)c(Cl)c(Cl)c1C(=O)Nc2cccc(OS(=O)(=O)C(F)(F)C(F)(F)C(F)(F)C(F)(F)C(F)(F)C(F)(F)F)c2                | -9.66  | 33.33 | 3.26 | P | OUT |
| QL00165 | Potassium 2,3,4,5-tetrachloro-6-[[[3-[[[undecafluoropentyl)sulphonyl]oxy]phenyl]amino]carbonyl]benzoate             | 68541-02-6   | [K+].[O-]C(=O)c1c(Cl)c(Cl)c(Cl)c1C(=O)Nc2cccc(OS(=O)(=O)C(F)(F)C(F)(F)C(F)(F)C(F)(F)C(F)(F)F)c2                       | -9.26  | 31.25 | 3.16 | P | OUT |
| QL00166 | Potassium 2,3,4,5-tetrachloro-6-[[[3-[[[nonafluorobutyl)sulphonyl]oxy]phenyl]amino]carbonyl]benzoate                | 68568-54-7   | [K+].[O-]C(=O)c1c(Cl)c(Cl)c(Cl)c1C(=O)Nc2cccc(OS(=O)(=O)C(F)(F)C(F)(F)C(F)(F)C(F)(F)F)c2                              | -8.92  | 28.89 | 3.08 | P | OUT |
| QL00167 | Potassium 4,4,5,5,6,6,7,7,8,8,9,9,10,10,11,11,11-heptafluoroundecanoate                                             | 83310-58-1   | [K+].[O-]C(=O)CCCC(F)(F)C(F)(F)C(F)(F)C(F)(F)C(F)(F)C(F)(F)C(F)(F)F                                                   | -9.57  | 48.57 | 2.80 | P | IN  |
| QL00168 | Potassium [(1,1,2,2,3,3,4,4,5,5,6,6,7,7,8,8,8-heptafluorooctane-1-sulfonyl)amino]acetate                            | 75260-69-4   | [K+].[O-]C(=O)CNS(=O)(=O)C(F)(F)C(F)(F)C(F)(F)C(F)(F)C(F)(F)C(F)(F)C(F)(F)F                                           | -9.50  | 45.95 | 2.85 | P | IN  |
| QL00169 | Potassium 1,1,2,3,3,3-hexafluoro-2-(trifluoromethyl)propanesulphonate                                               | 93762-10-8   | [K+].[O-]S(=O)(=O)C(F)(F)C(F)(F)C(F)(F)C(F)(F)F                                                                       | -6.77  | 50.00 | 1.61 | P | IN  |
| QL00170 | Potassium 1,1,2,2,3,3,4,4,5,5,6,6,7,7,8,8,9,9,10,10,11,11,12,12-pentacosafuorododecane-1-sulphonate                 | 85187-17-3   | [K+].[O-]S(=O)(=O)C(F)(F)C(F)(F)C(F)(F)C(F)(F)C(F)(F)C(F)(F)C(F)(F)C(F)(F)C(F)(F)C(F)(F)C(F)(F)C(F)(F)C(F)(F)C(F)(F)F | -10.75 | 59.52 | 2.99 | P | OUT |
| QL00171 | Potassium henicosafuorodecanesulphonate                                                                             | 2806-16-8    | [K+].[O-]S(=O)(=O)C(F)(F)C(F)(F)C(F)(F)C(F)(F)C(F)(F)C(F)(F)C(F)(F)C(F)(F)C(F)(F)C(F)(F)C(F)(F)C(F)(F)F               | -10.20 | 58.33 | 2.79 | P | OUT |
| QL00172 | Perfluorononanesulphonate potassium                                                                                 | 29359-39-5   | [K+].[O-]S(=O)(=O)C(F)(F)C(F)(F)C(F)(F)C(F)(F)C(F)(F)C(F)(F)C(F)(F)C(F)(F)F                                           | -9.76  | 57.58 | 2.63 | P | IN  |
| QL00173 | Potassium heptafluorooctane-1-sulphonate                                                                            | 2795-39-3    | [K+].[O-]S(=O)(=O)C(F)(F)C(F)(F)C(F)(F)C(F)(F)C(F)(F)C(F)(F)F                                                         | -9.55  | 56.67 | 2.57 | P | IN  |
| QL00174 | Potassium 1,1,2,2,3,3,4,4,5,5,6,6,7,7,7-pentadecafluoroheptane-1-sulphonate                                         | 60270-55-5   | [K+].[O-]S(=O)(=O)C(F)(F)C(F)(F)C(F)(F)C(F)(F)C(F)(F)C(F)(F)C(F)(F)F                                                  | -9.02  | 55.56 | 2.38 | P | IN  |
| QL00175 | PFHS-K                                                                                                              | 3871-99-6    | [K+].[O-]S(=O)(=O)C(F)(F)C(F)(F)C(F)(F)C(F)(F)C(F)(F)F                                                                | -8.76  | 54.17 | 2.31 | P | IN  |
| QL00176 | Potassium perfluoropentanesulphonate                                                                                | 3872-25-1    | [K+].[O-]S(=O)(=O)C(F)(F)C(F)(F)C(F)(F)C(F)(F)F                                                                       | -8.07  | 52.38 | 2.08 | P | IN  |
| QL00177 | Potassium 1,1,2,2,3,3,4,4,4-nonafluorobutane-1-sulphonate                                                           | 29420-49-3   | [K+].[O-]S(=O)(=O)C(F)(F)C(F)(F)C(F)(F)C(F)(F)F                                                                       | -7.72  | 50.00 | 2.00 | P | IN  |
| QL00178 | Potassium 1,1,2,2,3,3,4,4-octafluorobutane-1-sulphonate                                                             | 70259-85-7   | [K+].[O-]S(=O)(=O)C(F)(F)C(F)(F)C(F)(F)C(F)(F)F                                                                       | -7.39  | 44.44 | 2.02 | P | IN  |
| QL00179 | Potassium 1,1,2,2-tetrafluoro-2-[[[1,1,1,2,3,3,3-hexafluoro-3-(pentafluoroethoxy)propan-2-yl]oxy]ethane-1-sulfonate | 70755-50-9   | [K+].[O-]S(=O)(=O)C(F)(F)C(F)(F)OC(F)(F)C(F)(F)C(F)(F)OC(F)(F)C(F)(F)F                                                | -9.19  | 51.72 | 2.56 | P | IN  |
| QL00180 | Potassium 9-chlorohexadecafluoro-3-oxanonane-1-sulfonate                                                            | 73606-19-6   | [K+].[O-]S(=O)(=O)C(F)(F)C(F)(F)OC(F)(F)C(F)(F)C(F)(F)C(F)(F)C(F)(F)C(F)(F)Cl                                         | -9.57  | 54.84 | 2.63 | P | IN  |
| QL00181 | Perfluoro-2-(hexyloxy)ethane-1-sulfonic acid potassium salt                                                         | 68136-88-9   | [K+].[O-]S(=O)(=O)C(F)(F)C(F)(F)OC(F)(F)C(F)(F)C(F)(F)C(F)(F)C(F)(F)F                                                 | -9.57  | 54.84 | 2.63 | P | IN  |
| QL00182 | Potassium 1,1,2,2-tetrafluoro-2-(pentafluoroethoxy)ethane-1-sulfonate                                               | 117205-07-9  | [K+].[O-]S(=O)(=O)C(F)(F)C(F)(F)OC(F)(F)C(F)(F)F                                                                      | -7.75  | 47.37 | 2.09 | P | IN  |
| QL00183 | Cyclohexanesulfonic acid, decafluoro(trifluoromethyl)-, potassium salt (11)                                         | 68156-07-0   | [K+].[O-]S(=O)(=O)C1(C(F)(F)C(F)(F)C(F)(F)C(F)(F)C(F)(F)C1)F                                                          | -7.12  | 52.00 | 1.70 | P | IN  |
| QL00184 | Potassium 1,2,2,3,3,4,4,5,5,6,6-decafluoro-4-(pentafluoroethyl)cyclohexanesulphonate                                | 335-24-0     | [K+].[O-]S(=O)(=O)C1(C(F)(F)C(F)(F)C(F)(F)C(F)(F)C(F)(F)C1)F                                                          | -8.84  | 53.57 | 2.36 | P | IN  |
| QL00185 | Potassium undecafluorocyclohexanesulphonate                                                                         | 3107-18-4    | [K+].[O-]S(=O)(=O)C1(C(F)(F)C(F)(F)C(F)(F)C(F)(F)C1)F                                                                 | -6.93  | 50.00 | 1.67 | P | IN  |
| QL00186 | Potassium 3,3,4,4,5,5,6,6,7,7,8,8,8-tridecafluorooctanesulphonate                                                   | 59587-38-1   | [K+].[O-]S(=O)(=O)CCCC(F)(F)C(F)(F)C(F)(F)C(F)(F)C(F)(F)F                                                             | -8.69  | 43.33 | 2.58 | P | IN  |
| QL00187 | Potassium 5,5,6,6,7,7,8,8,8-nonafluorooctane-1-sulfonate                                                            | 1604816-60-5 | [K+].[O-]S(=O)(=O)CCCCC(F)(F)C(F)(F)C(F)(F)C(F)(F)F                                                                   | -7.76  | 30.00 | 2.57 | P | OUT |
| QL00188 | Potassium 3,3,4,4,5,5,6,6,7,7,8,8,9,9,10,10,11,11,12,12,12-henicosafuorododecyl sulfate                             | 1262446-14-9 | [K+].[O-]S(=O)(=O)OCCCC(F)(F)C(F)(F)C(F)(F)C(F)(F)C(F)(F)C(F)(F)C(F)(F)C(F)(F)C(F)(F)C(F)(F)F                         | -10.13 | 48.84 | 3.03 | P | OUT |
| QL00189 | Potassium 3,3,4,4,5,5,6,6,7,7,8,8,9,9,10,10,10-heptafluorodecyl sulfate                                             | 1262446-13-8 | [K+].[O-]S(=O)(=O)OCCCC(F)(F)C(F)(F)C(F)(F)C(F)(F)C(F)(F)C(F)(F)C(F)(F)F                                              | -9.50  | 45.95 | 2.85 | P | IN  |
| QL00190 | 3-[(Perfluorooctane-1-sulfonyl)amino]-N,N-dimethylpropan-1-amine N-oxide potassium                                  | 178094-69-4  | [K+].C[N+](C)([O-])CCC[N-]S(=O)(=O)C(F)(F)C(F)(F)C(F)(F)C(F)(F)C(F)(F)C(F)(F)F                                        | -9.19  | 34.69 | 3.03 | P | IN  |
| QL00191 | 3-[(Perfluoroheptane-1-sulfonyl)amino]-N,N-dimethylpropan-1-amine N-oxide potassium salt                            | 178094-70-7  | [K+].C[N+](C)([O-])CCC[N-]S(=O)(=O)C(F)(F)C(F)(F)C(F)(F)C(F)(F)C(F)(F)F                                               | -8.97  | 32.61 | 3.00 | P | OUT |
| QL00192 | 3-[(Perfluorohexane-1-sulfonyl)amino]-N,N-dimethylpropan-1-amine N-oxide potassium salt                             | 178094-71-8  | [K+].C[N+](C)([O-])CCC[N-]S(=O)(=O)C(F)(F)C(F)(F)C(F)(F)C(F)(F)C(F)(F)F                                               | -8.47  | 30.23 | 2.86 | P | OUT |



|         |                                                                                                                  |              |                                                                                                                                                                                                                                                                                                                                |        |       |      |   |     |
|---------|------------------------------------------------------------------------------------------------------------------|--------------|--------------------------------------------------------------------------------------------------------------------------------------------------------------------------------------------------------------------------------------------------------------------------------------------------------------------------------|--------|-------|------|---|-----|
| QL00193 | 3-[(Perfluoropentane-1-sulfonyl)amino]-N,N-dimethylpropan-1-amine N-oxide potassium salt                         | 178094-72-9  | [K+].[C][N+](C)[O]([O-])CCC[N-]S(=O)(=O)C(F)(F)C(F)(F)C(F)(F)C(F)(F)F                                                                                                                                                                                                                                                          | -8.20  | 27.50 | 2.82 | P | OUT |
| QL00194 | 3-[(Perfluorobutane-1-sulfonyl)amino]-N,N-dimethylpropan-1-amine N-oxide potassium salt                          | 178094-73-0  | [K+].[C][N+](C)[O]([O-])CCC[N-]S(=O)(=O)C(F)(F)C(F)(F)C(F)(F)C(F)(F)F                                                                                                                                                                                                                                                          | -7.60  | 24.32 | 2.66 | P | OUT |
| QL00195 | Cyclohexanesulfonic acid, decafluoro(pentafluoroethyl)-, potassium salt (TSCA, DSL, AICS)                        | 67584-42-3   | [K+].C1(C(C(C(C(C1F)(F)(F)(F)(F)(F)(F)F(S(=O)(=O)[O-]))C(C)(F)(F)(F)F                                                                                                                                                                                                                                                          | -7.97  | 53.57 | 2.01 | P | IN  |
| QL00196 | Potassium N-propyl-N-((tridecafluoroheptyl)sulphonyl)glycinate                                                   | 85665-66-3   | [K+].CCCN(CC([O-])=O)S(=O)(=O)C(F)(F)C(F)(F)C(F)(F)C(F)(F)C(F)(F)C(F)(F)F                                                                                                                                                                                                                                                      | -8.09  | 32.50 | 2.64 | P | IN  |
| QL00197 | Potassium N-[(heptadecafluoroctyl)sulphonyl]-N-propylglycinate                                                   | 55910-10-6   | [K+].CCCN(CC(=O)[O-])S(=O)(=O)C(F)(F)C(F)(F)C(F)(F)C(F)(F)C(F)(F)C(F)(F)C(F)(F)F                                                                                                                                                                                                                                               | -8.90  | 36.96 | 2.85 | P | IN  |
| QL00198 | Potassium N-ethyl-N-[(heptadecafluoroctyl)sulphonyl]glycinate                                                    | 2991-51-7    | [K+].CCN(CC(=O)[O-])[O-]S(=O)(=O)C(F)(F)C(F)(F)C(F)(F)C(F)(F)C(F)(F)C(F)(F)C(F)(F)F                                                                                                                                                                                                                                            | -9.09  | 39.53 | 2.85 | P | IN  |
| QL00199 | Potassium N-ethyl-N-[(pentadecafluoroheptyl)sulphonyl]glycinate                                                  | 67584-62-7   | [K+].CCN(CC(=O)[O-])[O-]S(=O)(=O)C(F)(F)C(F)(F)C(F)(F)C(F)(F)C(F)(F)C(F)(F)F                                                                                                                                                                                                                                                   | -8.83  | 37.50 | 2.81 | P | IN  |
| QL00200 | Potassium N-ethyl-N-[(tridecafluoroheptyl)sulphonyl]glycinate                                                    | 67584-53-6   | [K+].CCN(CC(=O)[O-])[O-]S(=O)(=O)C(F)(F)C(F)(F)C(F)(F)C(F)(F)C(F)(F)C(F)(F)F                                                                                                                                                                                                                                                   | -8.28  | 35.14 | 2.65 | P | IN  |
| QL00201 | Potassium N-ethyl-N-[(undecafluoropentyl)sulphonyl]glycinate                                                     | 67584-52-5   | [K+].CCN(CC(=O)[O-])S(=O)(=O)C(F)(F)C(F)(F)C(F)(F)C(F)(F)C(F)(F)F                                                                                                                                                                                                                                                              | -7.97  | 32.35 | 2.59 | P | IN  |
| QL00202 | Potassium N-ethyl-N-[(nonafluorobutyl)sulphonyl]glycinate                                                        | 67584-51-4   | [K+].CCN(CC(=O)[O-])S(=O)(=O)C(F)(F)C(F)(F)C(F)(F)C(F)(F)C(F)(F)F                                                                                                                                                                                                                                                              | -7.29  | 29.03 | 2.40 | P | OUT |
| QL00203 | 1-[2-{Ethyl[(perfluorooctyl)sulfonyl]amino}ethyl]butanedioate potassium                                          | 92340-26-6   | [K+].CCN(CCOCC(=O)CCCC([O-]))O)S(=O)(=O)C(F)(F)C(F)(F)C(F)(F)C(F)(F)C(F)(F)C(F)(F)C(F)(F)F                                                                                                                                                                                                                                     | -9.67  | 30.91 | 3.33 | P | OUT |
| QL00204 | Potassium N-[(heptadecafluoroctyl)sulphonyl]-N-methylglycinate                                                   | 70281-93-5   | [K+].CN(CC(=O)[O-])S(=O)(=O)C(F)(F)C(F)(F)C(F)(F)C(F)(F)C(F)(F)C(F)(F)C(F)(F)F                                                                                                                                                                                                                                                 | -9.28  | 42.50 | 2.85 | P | IN  |
| QL00205 | Potassium N-(perfluoro-7-methyloctyl)-2-hydroxypropyl)-N-methylaminoacetate                                      | 94159-89-4   | [K+].CN(CC(O)CC(F)(F)C(F)(F)C(F)(F)C(F)(F)C(F)(F)C(F)(F)C(F)(F)C(F)(F)C([O-])=O                                                                                                                                                                                                                                                | -9.36  | 38.00 | 3.01 | P | IN  |
| QL00206 | Potassium N-(perfluorooctyl)-2-hydroxypropyl)-N-methylglycinate                                                  | 94159-87-2   | [K+].CN(CC(O)CC(F)(F)C(F)(F)C(F)(F)C(F)(F)C(F)(F)C(F)(F)C(F)(F)C([O-])=O                                                                                                                                                                                                                                                       | -9.33  | 36.17 | 3.05 | P | IN  |
| QL00207 | Potassium bis(perfluoroheptyl)difluoroborate                                                                     | 937038-66-9  | [K+].F[B-]](F)(F)(F)(F)(F)(F)C(F)(F)C(F)(F)C(F)(F)C(F)(F)C(F)(F)C(F)(F)C(F)(F)C(F)(F)F                                                                                                                                                                                                                                         | -11.23 | 66.67 | 2.99 | P | OUT |
| QL00208 | Potassium N,N-Bis(perfluorobutanesulfonyl)amide                                                                  | 129135-87-1  | [K+].FC(F)(F)C(F)(F)C(F)(F)C(F)(F)S(=O)(=O)[N-]S(=O)(=O)C(F)(F)C(F)(F)C(F)(F)C(F)(F)F                                                                                                                                                                                                                                          | -9.73  | 52.94 | 2.75 | P | IN  |
| QL00209 | Potassium 4,4,5,5,6,6-hexafluoro-1,1,3,3-tetraoxo-1lambda~6~,3lambda~6~-2-dithiazinan-2-ide                      | 588668-97-7  | [K+].FC1(F)C(F)(F)S(=O)(=O)[N-]S(=O)(=O)C1(F)F                                                                                                                                                                                                                                                                                 | -5.56  | 35.29 | 1.52 | P | IN  |
| QL00210 | Potassium decafluoro(pentafluoroethyl)cyclohexanesulphonate                                                      | 67584-42-3   | [K+].O=S(=O)([O-])C1(F)C(F)(F)C(F)(F)C(F)(F)C1(F)(F)C(F)(F)C(F)(F)F                                                                                                                                                                                                                                                            | -7.97  | 53.57 | 2.01 | P | IN  |
| QL00211 | Lanthanum, tris(6,6,7,7,8,8-heptafluoro-2,2-dimethyl-3,5-octanedionato-βO3,BO5)-                                 | 19106-89-9   | [La+3].CC(C)(C)C(Cl([O-])=CC(=O)C(F)(F)C(F)(F)C(F)(F)C(F)(F)F.CC(C)(OC(C([O-])=CC(=O)C(F)(F)C(F)(F)C(F)(F)C(F)(F)C(F)(F)F.CC(C)(OC(C([O-])=CC(=O)C(F)(F)C(F)(F)C(F)(F)C(F)(F)C(F)(F)F.[Li+].[H]C([H])(OC(=O)CCSCC([O-]))=OC(C(=O)OC(C([H])([H])C([H])([H])C(F)(F)C(F)(F)C(F)(F)C(F)(F)C([H])([H])C(F)(F)C(F)(F)C(F)(F)C(F)(F)F | -6.53  | 23.86 | 2.24 | P | OUT |
| QL00212 | Bis(perfluorobutyl)ethyl) 2-[(carboxymethyl)thio]butanedioate lithium salt                                       | 503534-33-6  | )])=OC(C(=O)OC(C([H])([H])C([H])([H])C(F)(F)C(F)(F)C(F)(F)C(F)(F)C([H])([H])C(F)(F)C(F)(F)C(F)(F)C(F)(F)F                                                                                                                                                                                                                      | -9.62  | 31.58 | 3.30 | P | OUT |
| QL00213 | Isooctanesulfonic acid, heptadecafluoro-, lithium salt                                                           | 93894-67-8   | [Li+].[O-]S(=O)(=O)C(F)(F)C(F)(F)C(F)(F)C(F)(F)C(F)(F)C(F)(F)C(F)(F)C(F)(F)F                                                                                                                                                                                                                                                   | -8.99  | 56.67 | 2.34 | P | IN  |
| QL00214 | 3-[(3,3,4,4,5,5,6,6,7,7,8,8-Tridecafluoroethyl)thio]propanoic acid lithium salt                                  | 433333-62-1  | [Li+].[O-]C(=O)CCSCCC(F)(F)C(F)(F)C(F)(F)C(F)(F)C(F)(F)C(F)(F)F                                                                                                                                                                                                                                                                | -8.95  | 36.11 | 2.89 | P | IN  |
| QL00215 | Lithium 1,1,1,3,3,4,4-heptafluoro-4-[(1,1,1,2,3,3,3-heptafluoropropan-2-yl)oxy]-2-(trifluoromethyl)butan-2-olate | 78740-39-3   | [Li+].[O-]C(C(F)(F)F)C(F)(F)C(F)(F)C(F)(F)OC(F)(C(F)(F)F)C(F)(F)F                                                                                                                                                                                                                                                              | -8.79  | 60.71 | 2.15 | P | IN  |
| QL00216 | Lithium heptadecafluoroctanesulphonate                                                                           | 29457-72-5   | [Li+].[O-]S(=O)(=O)C(F)(F)C(F)(F)C(F)(F)C(F)(F)C(F)(F)C(F)(F)C(F)(F)C(F)(F)F                                                                                                                                                                                                                                                   | -9.55  | 56.67 | 2.57 | P | IN  |
| QL00217 | Lithium perfluoroheptanesulfonate                                                                                | 117806-54-9  | [Li+].[O-]S(=O)(=O)C(F)(F)C(F)(F)C(F)(F)C(F)(F)C(F)(F)C(F)(F)F                                                                                                                                                                                                                                                                 | -9.02  | 55.56 | 2.38 | P | IN  |
| QL00218 | Lithium perfluoroheptanesulfonate                                                                                | 55120-77-9   | [Li+].[O-]S(=O)(=O)C(F)(F)C(F)(F)C(F)(F)C(F)(F)C(F)(F)C(F)(F)F                                                                                                                                                                                                                                                                 | -8.76  | 54.17 | 2.31 | P | IN  |
| QL00219 | Lithium nonafluorobutane-1-sulfonate                                                                             | 131651-65-5  | [Li+].[O-]S(=O)(=O)C(F)(F)C(F)(F)C(F)(F)C(F)(F)F                                                                                                                                                                                                                                                                               | -7.72  | 50.00 | 2.00 | P | IN  |
| QL00220 | Lithium 5,5,6,6,7,7,8,8,8-nonafluorooctane-1-sulfonate                                                           | 1604816-75-2 | [Li+].[O-]S(=O)(=O)CCCCC(F)(F)C(F)(F)C(F)(F)C(F)(F)F                                                                                                                                                                                                                                                                           | -7.76  | 30.00 | 2.57 | P | OUT |
| QL00221 | Lithium salt N,N-bis(1,1,2,2,3,3,4,4,4-nonafluorobutyl)sulfonylamine                                             | 476304-39-9  | [Li+].CC(CSCCC(F)(F)C(F)(F)C(F)(F)C(F)(F)C(F)(F)C(F)(F)C(F)(F)C([O-])=O                                                                                                                                                                                                                                                        | -9.45  | 37.78 | 3.05 | P | IN  |
| QL00222 | Lithium salt                                                                                                     | 119229-99-1  | [Li+].FC(F)(F)C(F)(F)C(F)(F)C(F)(F)S(=O)(=O)[N-]S(=O)(=O)C(F)(F)C(F)(F)C(F)(F)C(F)(F)F                                                                                                                                                                                                                                         | -9.73  | 52.94 | 2.75 | P | IN  |
| QL00223 | Lithium bis[(pentafluoroethyl)sulfonyl]azanide                                                                   | 132843-44-8  | [Li+].FC(F)(F)C(F)(F)S(=O)(=O)[N-]S(=O)(=O)C(F)(F)C(F)(F)C(F)(F)C(F)(F)F                                                                                                                                                                                                                                                       | -8.03  | 45.45 | 2.25 | P | IN  |
| QL00224 | Lithium 4,4,5,5,6,6-hexafluoro-1,1,3,3-tetraoxo-1lambda~6~,3lambda~6~-2-dithiazinan-2-ide                        | 189217-62-7  | [Li+].FC1(F)C(F)(F)S(=O)(=O)[N-]S(=O)(=O)C1(F)F                                                                                                                                                                                                                                                                                | -5.56  | 35.29 | 1.52 | P | IN  |
| QL00225 | Magnesium heptadecafluoroisooctanesulphonate                                                                     | 93894-73-6   | [Mg++].[O-]S(=O)(=O)C(F)(F)C(F)(F)C(F)(F)C(F)(F)C(F)(F)C(F)(F)C(F)(F)C(F)(F)F.[O-]S(=O)(=O)C(F)(F)C(F)(F)C(F)(F)C(F)(F)C(F)(F)C(F)(F)C(F)(F)F                                                                                                                                                                                  | -8.93  | 57.63 | 2.29 | P | IN  |
| QL00226 | Magnesium nonafluorobutanesulphonate                                                                             | 507453-86-3  | [Mg++].[O-]S(=O)(=O)C(F)(F)C(F)(F)C(F)(F)C(F)(F)F.[O-]S(=O)(=O)C(F)(F)C(F)(F)C(F)(F)C(F)(F)F                                                                                                                                                                                                                                   | -7.64  | 51.43 | 1.93 | P | IN  |
| QL00227 | Magnesium bis[heptadecafluoroctanesulphonate]                                                                    | 91036-71-4   | [Mg+2].[O-]S(=O)(=O)C(F)(F)C(F)(F)C(F)(F)C(F)(F)C(F)(F)C(F)(F)C(F)(F)F.[O-]S(=O)(=O)C(F)(F)C(F)(F)C(F)(F)C(F)(F)C(F)(F)C(F)(F)C(F)(F)F                                                                                                                                                                                         | -9.50  | 57.63 | 2.53 | P | IN  |
| QL00228 | Sodium hydrogen ((perfluoroheptyl)ethyl)phosphonate                                                              | 1189052-95-6 | [Na+].[H]C([H])(CP(O)([O-])=O)C(F)(F)C(F)(F)C(F)(F)C(F)(F)C(F)(F)F                                                                                                                                                                                                                                                             | -8.59  | 41.94 | 2.58 | P | IN  |
| QL00229 | Sodium 3-(methyl(3-((tridecafluoroheptyl)sulphonyl)amino)propyl)amino)pr                                         | 80621-17-6   | [Na+].[H]N(CCCN(C)CCCS([O-])=(O)=O)S(=O)(=O)C(F)(F)C(F)(F)C(F)(F)C(F)(F)C(F)(F)F                                                                                                                                                                                                                                               | -8.93  | 25.00 | 3.19 | P | OUT |



























[illegible]



[illegible]















[illegible]







[illegible]



[illegible]



[illegible]















[illegible]



[illegible]



[illegible]



|         |                                                                                                               |              |                                                                                                                                                                                                                                                                                                                                                                                                                                                                                                                                                                                                                                                                                                                                                                                                                                                                                                                                                                                                                                                                                                                                                                                                                                                                                                                                                                                                                                                                                                                                                                                                                                                                                                                                                                                                                                                                                                                                                                                                                                                                                                                                                                                                                                                                                                                                                                                                                                                                                                                                                                                                                                                                                                                                                                                                                                                                                                                                                                                                                                                                                                                                                                                                                                                                                                                                                                                                                                                                                                                                                                                                                                                                                                                                                                                                                                                                                                                                                                                                                                                                                                                                                                                                                                                                                                                                                                                                                                                                                                                                                                                                                                                                                                                                                                                                                                                                                                                                                                                                                                                                                                                                                                                                                                                                                                                                                                                                                                                                                                                                                                                                                                                                                                                                                                                                                                                                                                                  |       |       |      |   |     |
|---------|---------------------------------------------------------------------------------------------------------------|--------------|------------------------------------------------------------------------------------------------------------------------------------------------------------------------------------------------------------------------------------------------------------------------------------------------------------------------------------------------------------------------------------------------------------------------------------------------------------------------------------------------------------------------------------------------------------------------------------------------------------------------------------------------------------------------------------------------------------------------------------------------------------------------------------------------------------------------------------------------------------------------------------------------------------------------------------------------------------------------------------------------------------------------------------------------------------------------------------------------------------------------------------------------------------------------------------------------------------------------------------------------------------------------------------------------------------------------------------------------------------------------------------------------------------------------------------------------------------------------------------------------------------------------------------------------------------------------------------------------------------------------------------------------------------------------------------------------------------------------------------------------------------------------------------------------------------------------------------------------------------------------------------------------------------------------------------------------------------------------------------------------------------------------------------------------------------------------------------------------------------------------------------------------------------------------------------------------------------------------------------------------------------------------------------------------------------------------------------------------------------------------------------------------------------------------------------------------------------------------------------------------------------------------------------------------------------------------------------------------------------------------------------------------------------------------------------------------------------------------------------------------------------------------------------------------------------------------------------------------------------------------------------------------------------------------------------------------------------------------------------------------------------------------------------------------------------------------------------------------------------------------------------------------------------------------------------------------------------------------------------------------------------------------------------------------------------------------------------------------------------------------------------------------------------------------------------------------------------------------------------------------------------------------------------------------------------------------------------------------------------------------------------------------------------------------------------------------------------------------------------------------------------------------------------------------------------------------------------------------------------------------------------------------------------------------------------------------------------------------------------------------------------------------------------------------------------------------------------------------------------------------------------------------------------------------------------------------------------------------------------------------------------------------------------------------------------------------------------------------------------------------------------------------------------------------------------------------------------------------------------------------------------------------------------------------------------------------------------------------------------------------------------------------------------------------------------------------------------------------------------------------------------------------------------------------------------------------------------------------------------------------------------------------------------------------------------------------------------------------------------------------------------------------------------------------------------------------------------------------------------------------------------------------------------------------------------------------------------------------------------------------------------------------------------------------------------------------------------------------------------------------------------------------------------------------------------------------------------------------------------------------------------------------------------------------------------------------------------------------------------------------------------------------------------------------------------------------------------------------------------------------------------------------------------------------------------------------------------------------------------------------------------------------------------------|-------|-------|------|---|-----|
| QL01033 | Disulfides, bis(gamma-, omega- perfluoro-C6-20-alkyl)                                                         | 118400-71-8  | CC(F)(F)C(F)(F)C(F)(F)CCSSCCCC(F)(F)C(F)(F)C(C)C(F)F                                                                                                                                                                                                                                                                                                                                                                                                                                                                                                                                                                                                                                                                                                                                                                                                                                                                                                                                                                                                                                                                                                                                                                                                                                                                                                                                                                                                                                                                                                                                                                                                                                                                                                                                                                                                                                                                                                                                                                                                                                                                                                                                                                                                                                                                                                                                                                                                                                                                                                                                                                                                                                                                                                                                                                                                                                                                                                                                                                                                                                                                                                                                                                                                                                                                                                                                                                                                                                                                                                                                                                                                                                                                                                                                                                                                                                                                                                                                                                                                                                                                                                                                                                                                                                                                                                                                                                                                                                                                                                                                                                                                                                                                                                                                                                                                                                                                                                                                                                                                                                                                                                                                                                                                                                                                                                                                                                                                                                                                                                                                                                                                                                                                                                                                                                                                                                                             | -7.83 | 30.00 | 2.60 | P | OUT |
| QL01034 | 1,1,1,2,2,3,3-heptafluorobutane                                                                               | 662-00-0     | CC(F)(F)C(F)(F)C(F)(F)F                                                                                                                                                                                                                                                                                                                                                                                                                                                                                                                                                                                                                                                                                                                                                                                                                                                                                                                                                                                                                                                                                                                                                                                                                                                                                                                                                                                                                                                                                                                                                                                                                                                                                                                                                                                                                                                                                                                                                                                                                                                                                                                                                                                                                                                                                                                                                                                                                                                                                                                                                                                                                                                                                                                                                                                                                                                                                                                                                                                                                                                                                                                                                                                                                                                                                                                                                                                                                                                                                                                                                                                                                                                                                                                                                                                                                                                                                                                                                                                                                                                                                                                                                                                                                                                                                                                                                                                                                                                                                                                                                                                                                                                                                                                                                                                                                                                                                                                                                                                                                                                                                                                                                                                                                                                                                                                                                                                                                                                                                                                                                                                                                                                                                                                                                                                                                                                                                          | -6.07 | 50.00 | 1.32 | P | IN  |
| QL01035 | 6-(1,1-Difluoroethoxy)-1,1,1,2,2,3,3,4,4,5,5-undecafluorohexane                                               | 197963-86-3  | CC(F)(F)OCC(F)(F)C(F)(F)C(F)(F)C(F)(F)C(F)(F)F                                                                                                                                                                                                                                                                                                                                                                                                                                                                                                                                                                                                                                                                                                                                                                                                                                                                                                                                                                                                                                                                                                                                                                                                                                                                                                                                                                                                                                                                                                                                                                                                                                                                                                                                                                                                                                                                                                                                                                                                                                                                                                                                                                                                                                                                                                                                                                                                                                                                                                                                                                                                                                                                                                                                                                                                                                                                                                                                                                                                                                                                                                                                                                                                                                                                                                                                                                                                                                                                                                                                                                                                                                                                                                                                                                                                                                                                                                                                                                                                                                                                                                                                                                                                                                                                                                                                                                                                                                                                                                                                                                                                                                                                                                                                                                                                                                                                                                                                                                                                                                                                                                                                                                                                                                                                                                                                                                                                                                                                                                                                                                                                                                                                                                                                                                                                                                                                   | -8.15 | 48.15 | 2.23 | P | IN  |
| QL01036 | 4-(1,1-Difluoroethoxy)-1,1,1,2,2,3,3-heptafluorobutane                                                        | 1365808-20-3 | CC(F)(F)OCC(F)(F)C(F)(F)C(F)(F)F                                                                                                                                                                                                                                                                                                                                                                                                                                                                                                                                                                                                                                                                                                                                                                                                                                                                                                                                                                                                                                                                                                                                                                                                                                                                                                                                                                                                                                                                                                                                                                                                                                                                                                                                                                                                                                                                                                                                                                                                                                                                                                                                                                                                                                                                                                                                                                                                                                                                                                                                                                                                                                                                                                                                                                                                                                                                                                                                                                                                                                                                                                                                                                                                                                                                                                                                                                                                                                                                                                                                                                                                                                                                                                                                                                                                                                                                                                                                                                                                                                                                                                                                                                                                                                                                                                                                                                                                                                                                                                                                                                                                                                                                                                                                                                                                                                                                                                                                                                                                                                                                                                                                                                                                                                                                                                                                                                                                                                                                                                                                                                                                                                                                                                                                                                                                                                                                                 | -7.01 | 42.86 | 1.91 | P | IN  |
| QL01037 | 1,1,1,2,2,3,3,4,4,5,5,6,6,7,7,8,8,9,9,10,10-Henicosafiuoro-12-iodotridecane                                   | 38550-36-6   | CC(I)CC(F)(F)C(F)(F)C(F)(F)C(F)(F)C(F)(F)C(F)(F)C(F)(F)C(F)(F)F                                                                                                                                                                                                                                                                                                                                                                                                                                                                                                                                                                                                                                                                                                                                                                                                                                                                                                                                                                                                                                                                                                                                                                                                                                                                                                                                                                                                                                                                                                                                                                                                                                                                                                                                                                                                                                                                                                                                                                                                                                                                                                                                                                                                                                                                                                                                                                                                                                                                                                                                                                                                                                                                                                                                                                                                                                                                                                                                                                                                                                                                                                                                                                                                                                                                                                                                                                                                                                                                                                                                                                                                                                                                                                                                                                                                                                                                                                                                                                                                                                                                                                                                                                                                                                                                                                                                                                                                                                                                                                                                                                                                                                                                                                                                                                                                                                                                                                                                                                                                                                                                                                                                                                                                                                                                                                                                                                                                                                                                                                                                                                                                                                                                                                                                                                                                                                                  | -9.76 | 53.66 | 2.74 | P | IN  |
| QL01038 | 1,1,1,2,2,3,3,4,4,5,5,6,6,7,7,8,8-Heptadecafluoro-10-iodoundecane                                             | 38550-35-5   | CC(I)CC(F)(F)C(F)(F)C(F)(F)C(F)(F)C(F)(F)C(F)(F)C(F)(F)F                                                                                                                                                                                                                                                                                                                                                                                                                                                                                                                                                                                                                                                                                                                                                                                                                                                                                                                                                                                                                                                                                                                                                                                                                                                                                                                                                                                                                                                                                                                                                                                                                                                                                                                                                                                                                                                                                                                                                                                                                                                                                                                                                                                                                                                                                                                                                                                                                                                                                                                                                                                                                                                                                                                                                                                                                                                                                                                                                                                                                                                                                                                                                                                                                                                                                                                                                                                                                                                                                                                                                                                                                                                                                                                                                                                                                                                                                                                                                                                                                                                                                                                                                                                                                                                                                                                                                                                                                                                                                                                                                                                                                                                                                                                                                                                                                                                                                                                                                                                                                                                                                                                                                                                                                                                                                                                                                                                                                                                                                                                                                                                                                                                                                                                                                                                                                                                         | -9.05 | 51.43 | 2.51 | P | IN  |
| QL01039 | 1-(Perfluoroheptyl)-2-iodopropane                                                                             | 25291-12-7   | CC(I)CC(F)(F)C(F)(F)C(F)(F)C(F)(F)C(F)(F)C(F)(F)F                                                                                                                                                                                                                                                                                                                                                                                                                                                                                                                                                                                                                                                                                                                                                                                                                                                                                                                                                                                                                                                                                                                                                                                                                                                                                                                                                                                                                                                                                                                                                                                                                                                                                                                                                                                                                                                                                                                                                                                                                                                                                                                                                                                                                                                                                                                                                                                                                                                                                                                                                                                                                                                                                                                                                                                                                                                                                                                                                                                                                                                                                                                                                                                                                                                                                                                                                                                                                                                                                                                                                                                                                                                                                                                                                                                                                                                                                                                                                                                                                                                                                                                                                                                                                                                                                                                                                                                                                                                                                                                                                                                                                                                                                                                                                                                                                                                                                                                                                                                                                                                                                                                                                                                                                                                                                                                                                                                                                                                                                                                                                                                                                                                                                                                                                                                                                                                                | -8.80 | 50.00 | 2.45 | P | IN  |
| QL01040 | 1-(Perfluoroethyl)-2-iodopropane                                                                              | 38550-34-4   | CC(I)CC(F)(F)C(F)(F)C(F)(F)C(F)(F)C(F)(F)F                                                                                                                                                                                                                                                                                                                                                                                                                                                                                                                                                                                                                                                                                                                                                                                                                                                                                                                                                                                                                                                                                                                                                                                                                                                                                                                                                                                                                                                                                                                                                                                                                                                                                                                                                                                                                                                                                                                                                                                                                                                                                                                                                                                                                                                                                                                                                                                                                                                                                                                                                                                                                                                                                                                                                                                                                                                                                                                                                                                                                                                                                                                                                                                                                                                                                                                                                                                                                                                                                                                                                                                                                                                                                                                                                                                                                                                                                                                                                                                                                                                                                                                                                                                                                                                                                                                                                                                                                                                                                                                                                                                                                                                                                                                                                                                                                                                                                                                                                                                                                                                                                                                                                                                                                                                                                                                                                                                                                                                                                                                                                                                                                                                                                                                                                                                                                                                                       | -8.17 | 48.28 | 2.24 | P | IN  |
| QL01041 | 1,1,1,2,2,3,3,4,4-Nonafluoro-6-iodoheptane                                                                    | 89889-25-8   | CC(I)CC(F)(F)C(F)(F)C(F)(F)C(F)(F)F                                                                                                                                                                                                                                                                                                                                                                                                                                                                                                                                                                                                                                                                                                                                                                                                                                                                                                                                                                                                                                                                                                                                                                                                                                                                                                                                                                                                                                                                                                                                                                                                                                                                                                                                                                                                                                                                                                                                                                                                                                                                                                                                                                                                                                                                                                                                                                                                                                                                                                                                                                                                                                                                                                                                                                                                                                                                                                                                                                                                                                                                                                                                                                                                                                                                                                                                                                                                                                                                                                                                                                                                                                                                                                                                                                                                                                                                                                                                                                                                                                                                                                                                                                                                                                                                                                                                                                                                                                                                                                                                                                                                                                                                                                                                                                                                                                                                                                                                                                                                                                                                                                                                                                                                                                                                                                                                                                                                                                                                                                                                                                                                                                                                                                                                                                                                                                                                              | -7.04 | 43.48 | 1.90 | P | IN  |
| QL01042 | 3,3,4,4,5,5-Heptafluoropentane-2-amine                                                                        | 1446355-42-5 | CC(N)C(F)(F)C(F)(F)C(F)(F)F                                                                                                                                                                                                                                                                                                                                                                                                                                                                                                                                                                                                                                                                                                                                                                                                                                                                                                                                                                                                                                                                                                                                                                                                                                                                                                                                                                                                                                                                                                                                                                                                                                                                                                                                                                                                                                                                                                                                                                                                                                                                                                                                                                                                                                                                                                                                                                                                                                                                                                                                                                                                                                                                                                                                                                                                                                                                                                                                                                                                                                                                                                                                                                                                                                                                                                                                                                                                                                                                                                                                                                                                                                                                                                                                                                                                                                                                                                                                                                                                                                                                                                                                                                                                                                                                                                                                                                                                                                                                                                                                                                                                                                                                                                                                                                                                                                                                                                                                                                                                                                                                                                                                                                                                                                                                                                                                                                                                                                                                                                                                                                                                                                                                                                                                                                                                                                                                                      | -5.52 | 36.84 | 1.46 | P | IN  |
| QL01043 | 2-Amino-4,4,5,5,6,6,6-heptafluorohexan-3-ol                                                                   | 355-88-4     | CC(N)C(O)C(F)(F)C(F)(F)C(F)(F)F                                                                                                                                                                                                                                                                                                                                                                                                                                                                                                                                                                                                                                                                                                                                                                                                                                                                                                                                                                                                                                                                                                                                                                                                                                                                                                                                                                                                                                                                                                                                                                                                                                                                                                                                                                                                                                                                                                                                                                                                                                                                                                                                                                                                                                                                                                                                                                                                                                                                                                                                                                                                                                                                                                                                                                                                                                                                                                                                                                                                                                                                                                                                                                                                                                                                                                                                                                                                                                                                                                                                                                                                                                                                                                                                                                                                                                                                                                                                                                                                                                                                                                                                                                                                                                                                                                                                                                                                                                                                                                                                                                                                                                                                                                                                                                                                                                                                                                                                                                                                                                                                                                                                                                                                                                                                                                                                                                                                                                                                                                                                                                                                                                                                                                                                                                                                                                                                                  | -5.98 | 30.43 | 1.83 | P | IN  |
| QL01044 | 2,2,3,3,4,4,4-Heptafluoro-N-(1-phenylethyl)butanamide                                                         | 51241-61-3   | CC(NC(=O)C(F)(F)C(F)(F)C(F)(F)F)C1=CC=CC=C1                                                                                                                                                                                                                                                                                                                                                                                                                                                                                                                                                                                                                                                                                                                                                                                                                                                                                                                                                                                                                                                                                                                                                                                                                                                                                                                                                                                                                                                                                                                                                                                                                                                                                                                                                                                                                                                                                                                                                                                                                                                                                                                                                                                                                                                                                                                                                                                                                                                                                                                                                                                                                                                                                                                                                                                                                                                                                                                                                                                                                                                                                                                                                                                                                                                                                                                                                                                                                                                                                                                                                                                                                                                                                                                                                                                                                                                                                                                                                                                                                                                                                                                                                                                                                                                                                                                                                                                                                                                                                                                                                                                                                                                                                                                                                                                                                                                                                                                                                                                                                                                                                                                                                                                                                                                                                                                                                                                                                                                                                                                                                                                                                                                                                                                                                                                                                                                                      | -6.91 | 22.58 | 2.43 | P | OUT |
| QL01045 | 2,3,3,3-Tetrafluoro-2-(heptafluoropropoxy)-N-[1-phenylethyl]propanamide                                       | 98873-61-1   | CC(NC(=O)C(F)(OC(F)(F)C(F)(F)C(F)(F)F)C(F)(F)F)c1ccccc1                                                                                                                                                                                                                                                                                                                                                                                                                                                                                                                                                                                                                                                                                                                                                                                                                                                                                                                                                                                                                                                                                                                                                                                                                                                                                                                                                                                                                                                                                                                                                                                                                                                                                                                                                                                                                                                                                                                                                                                                                                                                                                                                                                                                                                                                                                                                                                                                                                                                                                                                                                                                                                                                                                                                                                                                                                                                                                                                                                                                                                                                                                                                                                                                                                                                                                                                                                                                                                                                                                                                                                                                                                                                                                                                                                                                                                                                                                                                                                                                                                                                                                                                                                                                                                                                                                                                                                                                                                                                                                                                                                                                                                                                                                                                                                                                                                                                                                                                                                                                                                                                                                                                                                                                                                                                                                                                                                                                                                                                                                                                                                                                                                                                                                                                                                                                                                                          | -7.96 | 28.95 | 2.68 | P | OUT |
| QL01046 | N'-[(2E)-5,5,6,6,7,7,7-Heptafluoro-4-oxohept-2-en-2-yl]-4-nitrobenzohydrazide                                 | 203201-05-2  | CC(NNC(=O)c1cccc(cc1)[(O-)](O)=C/C(=O)C(F)(F)C(F)(F)C(F)(F)F                                                                                                                                                                                                                                                                                                                                                                                                                                                                                                                                                                                                                                                                                                                                                                                                                                                                                                                                                                                                                                                                                                                                                                                                                                                                                                                                                                                                                                                                                                                                                                                                                                                                                                                                                                                                                                                                                                                                                                                                                                                                                                                                                                                                                                                                                                                                                                                                                                                                                                                                                                                                                                                                                                                                                                                                                                                                                                                                                                                                                                                                                                                                                                                                                                                                                                                                                                                                                                                                                                                                                                                                                                                                                                                                                                                                                                                                                                                                                                                                                                                                                                                                                                                                                                                                                                                                                                                                                                                                                                                                                                                                                                                                                                                                                                                                                                                                                                                                                                                                                                                                                                                                                                                                                                                                                                                                                                                                                                                                                                                                                                                                                                                                                                                                                                                                                                                     | -7.87 | 18.42 | 2.94 | P | OUT |
| QL01047 | N'-[(2Z)-5,5,6,6,7,7,8,8,9,10,10,11,11,12,12-Heptadecafluoro-4-oxododec-2-en-2-yl]benzohydrazide              | 203200-82-2  | CC(NNC(=O)c1cccc1)=CC(=O)C(F)(F)C(F)(F)C(F)(F)C(F)(F)C(F)(F)C(F)(F)C(F)(F)F                                                                                                                                                                                                                                                                                                                                                                                                                                                                                                                                                                                                                                                                                                                                                                                                                                                                                                                                                                                                                                                                                                                                                                                                                                                                                                                                                                                                                                                                                                                                                                                                                                                                                                                                                                                                                                                                                                                                                                                                                                                                                                                                                                                                                                                                                                                                                                                                                                                                                                                                                                                                                                                                                                                                                                                                                                                                                                                                                                                                                                                                                                                                                                                                                                                                                                                                                                                                                                                                                                                                                                                                                                                                                                                                                                                                                                                                                                                                                                                                                                                                                                                                                                                                                                                                                                                                                                                                                                                                                                                                                                                                                                                                                                                                                                                                                                                                                                                                                                                                                                                                                                                                                                                                                                                                                                                                                                                                                                                                                                                                                                                                                                                                                                                                                                                                                                      | -9.61 | 33.33 | 3.24 | P | OUT |
| QL01048 | N'-[(2Z)-5,5,6,6,7,7,7-Heptafluoro-4-oxohept-2-en-2-yl]benzohydrazide                                         | 203200-76-4  | CC(NNC(=O)c1cccc1)=CC(=O)C(F)(F)C(F)(F)C(F)(F)F                                                                                                                                                                                                                                                                                                                                                                                                                                                                                                                                                                                                                                                                                                                                                                                                                                                                                                                                                                                                                                                                                                                                                                                                                                                                                                                                                                                                                                                                                                                                                                                                                                                                                                                                                                                                                                                                                                                                                                                                                                                                                                                                                                                                                                                                                                                                                                                                                                                                                                                                                                                                                                                                                                                                                                                                                                                                                                                                                                                                                                                                                                                                                                                                                                                                                                                                                                                                                                                                                                                                                                                                                                                                                                                                                                                                                                                                                                                                                                                                                                                                                                                                                                                                                                                                                                                                                                                                                                                                                                                                                                                                                                                                                                                                                                                                                                                                                                                                                                                                                                                                                                                                                                                                                                                                                                                                                                                                                                                                                                                                                                                                                                                                                                                                                                                                                                                                  | -7.42 | 19.44 | 2.72 | P | OUT |
| QL01049 | N-[3-{Dimethylamino}propyl]-perfluoro-1-hexanesulfonamide acetate                                             | 73772-33-5   | CC(O)=O.CN(C)CCCN(S(=O)(=O)=O)C(F)(F)C(F)(F)C(F)(F)C(F)(F)C(F)(F)C(F)(F)F                                                                                                                                                                                                                                                                                                                                                                                                                                                                                                                                                                                                                                                                                                                                                                                                                                                                                                                                                                                                                                                                                                                                                                                                                                                                                                                                                                                                                                                                                                                                                                                                                                                                                                                                                                                                                                                                                                                                                                                                                                                                                                                                                                                                                                                                                                                                                                                                                                                                                                                                                                                                                                                                                                                                                                                                                                                                                                                                                                                                                                                                                                                                                                                                                                                                                                                                                                                                                                                                                                                                                                                                                                                                                                                                                                                                                                                                                                                                                                                                                                                                                                                                                                                                                                                                                                                                                                                                                                                                                                                                                                                                                                                                                                                                                                                                                                                                                                                                                                                                                                                                                                                                                                                                                                                                                                                                                                                                                                                                                                                                                                                                                                                                                                                                                                                                                                        | -8.65 | 26.00 | 3.05 | P | OUT |
| QL01050 | Acetic acid-4-(heptafluoropropyl)phenol (1/1)                                                                 | 61324-27-4   | CC(O)=O.OC1=CC=C(C=C1)C(F)(F)C(F)(F)C(F)(F)F                                                                                                                                                                                                                                                                                                                                                                                                                                                                                                                                                                                                                                                                                                                                                                                                                                                                                                                                                                                                                                                                                                                                                                                                                                                                                                                                                                                                                                                                                                                                                                                                                                                                                                                                                                                                                                                                                                                                                                                                                                                                                                                                                                                                                                                                                                                                                                                                                                                                                                                                                                                                                                                                                                                                                                                                                                                                                                                                                                                                                                                                                                                                                                                                                                                                                                                                                                                                                                                                                                                                                                                                                                                                                                                                                                                                                                                                                                                                                                                                                                                                                                                                                                                                                                                                                                                                                                                                                                                                                                                                                                                                                                                                                                                                                                                                                                                                                                                                                                                                                                                                                                                                                                                                                                                                                                                                                                                                                                                                                                                                                                                                                                                                                                                                                                                                                                                                     | -7.44 | 23.33 | 2.62 | P | OUT |
| QL01051 | 3,3,4,4,5,5,6,6,7,7,8,8-Tridecafluorooctan-2-ol                                                               | 64773-44-0   | CC(O)C(F)(F)C(F)(F)C(F)(F)C(F)(F)C(F)(F)C(F)(F)F                                                                                                                                                                                                                                                                                                                                                                                                                                                                                                                                                                                                                                                                                                                                                                                                                                                                                                                                                                                                                                                                                                                                                                                                                                                                                                                                                                                                                                                                                                                                                                                                                                                                                                                                                                                                                                                                                                                                                                                                                                                                                                                                                                                                                                                                                                                                                                                                                                                                                                                                                                                                                                                                                                                                                                                                                                                                                                                                                                                                                                                                                                                                                                                                                                                                                                                                                                                                                                                                                                                                                                                                                                                                                                                                                                                                                                                                                                                                                                                                                                                                                                                                                                                                                                                                                                                                                                                                                                                                                                                                                                                                                                                                                                                                                                                                                                                                                                                                                                                                                                                                                                                                                                                                                                                                                                                                                                                                                                                                                                                                                                                                                                                                                                                                                                                                                                                                 | -7.98 | 48.15 | 2.16 | P | IN  |
| QL01052 | 1H,1H,1H,2H-Perfluoro-2-heptanol                                                                              | 914637-05-1  | CC(O)C(F)(F)C(F)(F)C(F)(F)C(F)(F)C(F)(F)F                                                                                                                                                                                                                                                                                                                                                                                                                                                                                                                                                                                                                                                                                                                                                                                                                                                                                                                                                                                                                                                                                                                                                                                                                                                                                                                                                                                                                                                                                                                                                                                                                                                                                                                                                                                                                                                                                                                                                                                                                                                                                                                                                                                                                                                                                                                                                                                                                                                                                                                                                                                                                                                                                                                                                                                                                                                                                                                                                                                                                                                                                                                                                                                                                                                                                                                                                                                                                                                                                                                                                                                                                                                                                                                                                                                                                                                                                                                                                                                                                                                                                                                                                                                                                                                                                                                                                                                                                                                                                                                                                                                                                                                                                                                                                                                                                                                                                                                                                                                                                                                                                                                                                                                                                                                                                                                                                                                                                                                                                                                                                                                                                                                                                                                                                                                                                                                                        | -7.19 | 45.83 | 1.90 | P | IN  |
| QL01053 | 1-Perfluoropropylethanol                                                                                      | 375-14-4     | CC(O)C(F)(F)C(F)(F)C(F)(F)F                                                                                                                                                                                                                                                                                                                                                                                                                                                                                                                                                                                                                                                                                                                                                                                                                                                                                                                                                                                                                                                                                                                                                                                                                                                                                                                                                                                                                                                                                                                                                                                                                                                                                                                                                                                                                                                                                                                                                                                                                                                                                                                                                                                                                                                                                                                                                                                                                                                                                                                                                                                                                                                                                                                                                                                                                                                                                                                                                                                                                                                                                                                                                                                                                                                                                                                                                                                                                                                                                                                                                                                                                                                                                                                                                                                                                                                                                                                                                                                                                                                                                                                                                                                                                                                                                                                                                                                                                                                                                                                                                                                                                                                                                                                                                                                                                                                                                                                                                                                                                                                                                                                                                                                                                                                                                                                                                                                                                                                                                                                                                                                                                                                                                                                                                                                                                                                                                      | -5.66 | 38.89 | 1.46 | P | IN  |
| QL01054 | 1-Pentafluoroethylenealcohol                                                                                  | 374-40-3     | CC(O)C(F)(F)C(F)(F)F                                                                                                                                                                                                                                                                                                                                                                                                                                                                                                                                                                                                                                                                                                                                                                                                                                                                                                                                                                                                                                                                                                                                                                                                                                                                                                                                                                                                                                                                                                                                                                                                                                                                                                                                                                                                                                                                                                                                                                                                                                                                                                                                                                                                                                                                                                                                                                                                                                                                                                                                                                                                                                                                                                                                                                                                                                                                                                                                                                                                                                                                                                                                                                                                                                                                                                                                                                                                                                                                                                                                                                                                                                                                                                                                                                                                                                                                                                                                                                                                                                                                                                                                                                                                                                                                                                                                                                                                                                                                                                                                                                                                                                                                                                                                                                                                                                                                                                                                                                                                                                                                                                                                                                                                                                                                                                                                                                                                                                                                                                                                                                                                                                                                                                                                                                                                                                                                                             | -5.04 | 33.33 | 1.36 | P | IN  |
| QL01055 | 3,3,4,5,5,6,6,7,7,7-Decafluoroheptan-2-ol                                                                     | 7618-17-9    | CC(O)C(F)(F)C(F)(F)C(F)(F)C(F)(F)F                                                                                                                                                                                                                                                                                                                                                                                                                                                                                                                                                                                                                                                                                                                                                                                                                                                                                                                                                                                                                                                                                                                                                                                                                                                                                                                                                                                                                                                                                                                                                                                                                                                                                                                                                                                                                                                                                                                                                                                                                                                                                                                                                                                                                                                                                                                                                                                                                                                                                                                                                                                                                                                                                                                                                                                                                                                                                                                                                                                                                                                                                                                                                                                                                                                                                                                                                                                                                                                                                                                                                                                                                                                                                                                                                                                                                                                                                                                                                                                                                                                                                                                                                                                                                                                                                                                                                                                                                                                                                                                                                                                                                                                                                                                                                                                                                                                                                                                                                                                                                                                                                                                                                                                                                                                                                                                                                                                                                                                                                                                                                                                                                                                                                                                                                                                                                                                                               | -6.93 | 41.67 | 1.91 | P | IN  |
| QL01056 | 3,3,4,4-Tetrafluoro-2-butanol                                                                                 | 17425-25-1   | CC(O)C(F)(F)C(F)F                                                                                                                                                                                                                                                                                                                                                                                                                                                                                                                                                                                                                                                                                                                                                                                                                                                                                                                                                                                                                                                                                                                                                                                                                                                                                                                                                                                                                                                                                                                                                                                                                                                                                                                                                                                                                                                                                                                                                                                                                                                                                                                                                                                                                                                                                                                                                                                                                                                                                                                                                                                                                                                                                                                                                                                                                                                                                                                                                                                                                                                                                                                                                                                                                                                                                                                                                                                                                                                                                                                                                                                                                                                                                                                                                                                                                                                                                                                                                                                                                                                                                                                                                                                                                                                                                                                                                                                                                                                                                                                                                                                                                                                                                                                                                                                                                                                                                                                                                                                                                                                                                                                                                                                                                                                                                                                                                                                                                                                                                                                                                                                                                                                                                                                                                                                                                                                                                                | -4.67 | 26.67 | 1.39 | P | OUT |
| QL01057 | 4,4,5,5,6,6,7,7,8,9,9-Dodecafluoro-2-{2-hydroxypropyl}-8-(trifluoromethyl)non-2-enoate                        | 16083-75-3   | CC(O)CC(=CC(F)(F)C(F)(F)C(F)(F)C(F)(F)C(F)(F)C(F)(F)C([O-])=O                                                                                                                                                                                                                                                                                                                                                                                                                                                                                                                                                                                                                                                                                                                                                                                                                                                                                                                                                                                                                                                                                                                                                                                                                                                                                                                                                                                                                                                                                                                                                                                                                                                                                                                                                                                                                                                                                                                                                                                                                                                                                                                                                                                                                                                                                                                                                                                                                                                                                                                                                                                                                                                                                                                                                                                                                                                                                                                                                                                                                                                                                                                                                                                                                                                                                                                                                                                                                                                                                                                                                                                                                                                                                                                                                                                                                                                                                                                                                                                                                                                                                                                                                                                                                                                                                                                                                                                                                                                                                                                                                                                                                                                                                                                                                                                                                                                                                                                                                                                                                                                                                                                                                                                                                                                                                                                                                                                                                                                                                                                                                                                                                                                                                                                                                                                                                                                    | -8.11 | 38.46 | 2.48 | P | IN  |
| QL01058 | 4(perfluorooctyl)-2-butanol                                                                                   | 149868-74-6  | CC(O)CCC(F)(F)C(F)(F)C(F)(F)C(F)(F)C(F)(F)C(F)(F)C(F)(F)F                                                                                                                                                                                                                                                                                                                                                                                                                                                                                                                                                                                                                                                                                                                                                                                                                                                                                                                                                                                                                                                                                                                                                                                                                                                                                                                                                                                                                                                                                                                                                                                                                                                                                                                                                                                                                                                                                                                                                                                                                                                                                                                                                                                                                                                                                                                                                                                                                                                                                                                                                                                                                                                                                                                                                                                                                                                                                                                                                                                                                                                                                                                                                                                                                                                                                                                                                                                                                                                                                                                                                                                                                                                                                                                                                                                                                                                                                                                                                                                                                                                                                                                                                                                                                                                                                                                                                                                                                                                                                                                                                                                                                                                                                                                                                                                                                                                                                                                                                                                                                                                                                                                                                                                                                                                                                                                                                                                                                                                                                                                                                                                                                                                                                                                                                                                                                                                        | -8.95 | 43.59 | 2.69 | P | IN  |
| QL01059 | 2,2,3,3,4,4,5,5,6,6,7,7,8,8-Pentadecafluoro-N-{2-hydroxypropyl}octanamide                                     | 1407514-44-6 | CC(O)CNC(=O)C(F)(F)C(F)(F)C(F)(F)C(F)(F)C(F)(F)C(F)(F)C(F)(F)F                                                                                                                                                                                                                                                                                                                                                                                                                                                                                                                                                                                                                                                                                                                                                                                                                                                                                                                                                                                                                                                                                                                                                                                                                                                                                                                                                                                                                                                                                                                                                                                                                                                                                                                                                                                                                                                                                                                                                                                                                                                                                                                                                                                                                                                                                                                                                                                                                                                                                                                                                                                                                                                                                                                                                                                                                                                                                                                                                                                                                                                                                                                                                                                                                                                                                                                                                                                                                                                                                                                                                                                                                                                                                                                                                                                                                                                                                                                                                                                                                                                                                                                                                                                                                                                                                                                                                                                                                                                                                                                                                                                                                                                                                                                                                                                                                                                                                                                                                                                                                                                                                                                                                                                                                                                                                                                                                                                                                                                                                                                                                                                                                                                                                                                                                                                                                                                   | -8.77 | 40.54 | 2.69 | P | IN  |
| QL01060 | 3,3-Dimethylbutan-2-yl 2,3,3,3-tetrafluoro-2-[1,1,2,3,3,3-hexafluoro-2-(heptafluoropropoxy)propoxy]propanoate | 107368-63-8  | CC(OC(=O)C(F)(OC(F)(F)C(F)(F)C(F)(F)C(F)(F)C(F)(F)C(F)(F)C(C)C)C                                                                                                                                                                                                                                                                                                                                                                                                                                                                                                                                                                                                                                                                                                                                                                                                                                                                                                                                                                                                                                                                                                                                                                                                                                                                                                                                                                                                                                                                                                                                                                                                                                                                                                                                                                                                                                                                                                                                                                                                                                                                                                                                                                                                                                                                                                                                                                                                                                                                                                                                                                                                                                                                                                                                                                                                                                                                                                                                                                                                                                                                                                                                                                                                                                                                                                                                                                                                                                                                                                                                                                                                                                                                                                                                                                                                                                                                                                                                                                                                                                                                                                                                                                                                                                                                                                                                                                                                                                                                                                                                                                                                                                                                                                                                                                                                                                                                                                                                                                                                                                                                                                                                                                                                                                                                                                                                                                                                                                                                                                                                                                                                                                                                                                                                                                                                                                                 | -8.37 | 34.69 | 2.69 | P | IN  |
| QL01061 | 1-(2,2,3,3,4,4,4-Heptafluorobutoxy)methyl acetate                                                             | 378-08-5     | CC(OC(C(F)(F)C(F)(F)C(F)(F)F)OC)C(=O)C                                                                                                                                                                                                                                                                                                                                                                                                                                                                                                                                                                                                                                                                                                                                                                                                                                                                                                                                                                                                                                                                                                                                                                                                                                                                                                                                                                                                                                                                                                                                                                                                                                                                                                                                                                                                                                                                                                                                                                                                                                                                                                                                                                                                                                                                                                                                                                                                                                                                                                                                                                                                                                                                                                                                                                                                                                                                                                                                                                                                                                                                                                                                                                                                                                                                                                                                                                                                                                                                                                                                                                                                                                                                                                                                                                                                                                                                                                                                                                                                                                                                                                                                                                                                                                                                                                                                                                                                                                                                                                                                                                                                                                                                                                                                                                                                                                                                                                                                                                                                                                                                                                                                                                                                                                                                                                                                                                                                                                                                                                                                                                                                                                                                                                                                                                                                                                                                           | -6.61 | 25.93 | 2.21 | P | OUT |
| QL01062 | 1,1'-(Oxybis((2-methylethylene)oxy))bis[3-(perfluoro-9-methyldecyl)propan-2-ol]                               | 93776-04-6   | CC(OC(C)C(F)(F)C(F)(F)C(F)(F)C(F)(F)C(F)(F)C(F)(F)C(F)(F)C(C)F)F)C(C)C(OC(C)C(F)(F)C(F)(F)C(F)(F)C(F)(F)C(F)(F)C(F)(F)C(F)(F)C(C)F)F)C(C)C(OC(C)C(F)(F)C(F)(F)C(F)(F)C(F)(F)C(F)(F)C(F)(F)C(F)(F)C(C)F)F)C(C)C(OC(C)C(F)(F)C(F)(F)C(F)(F)C(F)(F)C(F)(F)C(F)(F)C(F)(F)C(C)F)F)C(C)C(OC(C)C(F)(F)C(F)(F)C(F)(F)C(F)(F)C(F)(F)C(F)(F)C(F)(F)C(C)F)F)C(C)C(OC(C)C(F)(F)C(F)(F)C(F)(F)C(F)(F)C(F)(F)C(F)(F)C(F)(F)C(C)F)F)C(C)C(OC(C)C(F)(F)C(F)(F)C(F)(F)C(F)(F)C(F)(F)C(F)(F)C(F)(F)C(C)F)F)C(C)C(OC(C)C(F)(F)C(F)(F)C(F)(F)C(F)(F)C(F)(F)C(F)(F)C(F)(F)C(C)F)F)C(C)C(OC(C)C(F)(F)C(F)(F)C(F)(F)C(F)(F)C(F)(F)C(F)(F)C(F)(F)C(C)F)F)C(C)C(OC(C)C(F)(F)C(F)(F)C(F)(F)C(F)(F)C(F)(F)C(F)(F)C(F)(F)C(C)F)F)C(C)C(OC(C)C(F)(F)C(F)(F)C(F)(F)C(F)(F)C(F)(F)C(F)(F)C(F)(F)C(C)F)F)C(C)C(OC(C)C(F)(F)C(F)(F)C(F)(F)C(F)(F)C(F)(F)C(F)(F)C(F)(F)C(C)F)F)C(C)C(OC(C)C(F)(F)C(F)(F)C(F)(F)C(F)(F)C(F)(F)C(F)(F)C(F)(F)C(C)F)F)C(C)C(OC(C)C(F)(F)C(F)(F)C(F)(F)C(F)(F)C(F)(F)C(F)(F)C(F)(F)C(C)F)F)C(C)C(OC(C)C(F)(F)C(F)(F)C(F)(F)C(F)(F)C(F)(F)C(F)(F)C(F)(F)C(C)F)F)C(C)C(OC(C)C(F)(F)C(F)(F)C(F)(F)C(F)(F)C(F)(F)C(F)(F)C(F)(F)C(C)F)F)C(C)C(OC(C)C(F)(F)C(F)(F)C(F)(F)C(F)(F)C(F)(F)C(F)(F)C(F)(F)C(C)F)F)C(C)C(OC(C)C(F)(F)C(F)(F)C(F)(F)C(F)(F)C(F)(F)C(F)(F)C(F)(F)C(C)F)F)C(C)C(OC(C)C(F)(F)C(F)(F)C(F)(F)C(F)(F)C(F)(F)C(F)(F)C(F)(F)C(C)F)F)C(C)C(OC(C)C(F)(F)C(F)(F)C(F)(F)C(F)(F)C(F)(F)C(F)(F)C(F)(F)C(C)F)F)C(C)C(OC(C)C(F)(F)C(F)(F)C(F)(F)C(F)(F)C(F)(F)C(F)(F)C(F)(F)C(C)F)F)C(C)C(OC(C)C(F)(F)C(F)(F)C(F)(F)C(F)(F)C(F)(F)C(F)(F)C(F)(F)C(C)F)F)C(C)C(OC(C)C(F)(F)C(F)(F)C(F)(F)C(F)(F)C(F)(F)C(F)(F)C(F)(F)C(C)F)F)C(C)C(OC(C)C(F)(F)C(F)(F)C(F)(F)C(F)(F)C(F)(F)C(F)(F)C(F)(F)C(C)F)F)C(C)C(OC(C)C(F)(F)C(F)(F)C(F)(F)C(F)(F)C(F)(F)C(F)(F)C(F)(F)C(C)F)F)C(C)C(OC(C)C(F)(F)C(F)(F)C(F)(F)C(F)(F)C(F)(F)C(F)(F)C(F)(F)C(C)F)F)C(C)C(OC(C)C(F)(F)C(F)(F)C(F)(F)C(F)(F)C(F)(F)C(F)(F)C(F)(F)C(C)F)F)C(C)C(OC(C)C(F)(F)C(F)(F)C(F)(F)C(F)(F)C(F)(F)C(F)(F)C(F)(F)C(C)F)F)C(C)C(OC(C)C(F)(F)C(F)(F)C(F)(F)C(F)(F)C(F)(F)C(F)(F)C(F)(F)C(C)F)F)C(C)C(OC(C)C(F)(F)C(F)(F)C(F)(F)C(F)(F)C(F)(F)C(F)(F)C(F)(F)C(C)F)F)C(C)C(OC(C)C(F)(F)C(F)(F)C(F)(F)C(F)(F)C(F)(F)C(F)(F)C(F)(F)C(C)F)F)C(C)C(OC(C)C(F)(F)C(F)(F)C(F)(F)C(F)(F)C(F)(F)C(F)(F)C(F)(F)C(C)F)F)C(C)C(OC(C)C(F)(F)C(F)(F)C(F)(F)C(F)(F)C(F)(F)C(F)(F)C(F)(F)C(C)F)F)C(C)C(OC(C)C(F)(F)C(F)(F)C(F)(F)C(F)(F)C(F)(F)C(F)(F)C(F)(F)C(C)F)F)C(C)C(OC(C)C(F)(F)C(F)(F)C(F)(F)C(F)(F)C(F)(F)C(F)(F)C(F)(F)C(C)F)F)C(C)C(OC(C)C(F)(F)C(F)(F)C(F)(F)C(F)(F)C(F)(F)C(F)(F)C(F)(F)C(C)F)F)C(C)C(OC(C)C(F)(F)C(F)(F)C(F)(F)C(F)(F)C(F)(F)C(F)(F)C(F)(F)C(C)F)F)C(C)C(OC(C)C(F)(F)C(F)(F)C(F)(F)C(F)(F)C(F)(F)C(F)(F)C(F)(F)C(C)F)F)C(C)C(OC(C)C(F)(F)C(F)(F)C(F)(F)C(F)(F)C(F)(F)C(F)(F)C(F)(F)C(C)F)F)C(C)C(OC(C)C(F)(F)C(F)(F)C(F)(F)C(F)(F)C(F)(F)C(F)(F)C(F)(F)C(C)F)F)C(C)C(OC(C)C(F)(F)C(F)(F)C(F)(F)C(F)(F)C(F)(F)C(F)(F)C(F)(F)C(C)F)F)C(C)C(OC(C)C(F)(F)C(F)(F)C(F)(F)C(F)(F)C(F)(F)C(F)(F)C(F)(F)C(C)F)F)C(C)C(OC(C)C(F)(F)C(F)(F)C(F)(F)C(F)(F)C(F)(F)C(F)(F)C(F)(F)C(C)F)F)C(C)C(OC(C)C(F)(F)C(F)(F)C(F)(F)C(F)(F)C(F)(F)C(F)(F)C(F)(F)C(C)F)F)C(C)C(OC(C)C(F)(F)C(F)(F)C(F)(F)C(F)(F)C(F)(F)C(F)(F)C(F)(F)C(C)F)F)C(C)C(OC(C)C(F)(F)C(F)(F)C(F)(F)C(F)(F)C(F)(F)C(F)(F)C(F)(F)C(C)F)F)C(C)C(OC(C)C(F)(F)C(F)(F)C(F)(F)C(F)(F)C(F)(F)C(F)(F)C(F)(F)C(C)F)F)C(C)C(OC(C)C(F)(F)C(F)(F)C(F)(F)C(F)(F)C(F)(F)C(F)(F)C(F)(F)C(C)F)F)C(C)C(OC(C)C(F)(F)C(F)(F)C(F)(F)C(F)(F)C(F)(F)C(F)(F)C(F)(F)C(C)F)F)C(C)C(OC(C)C(F)(F)C(F)(F)C(F)(F)C(F)(F)C(F)(F)C(F)(F)C(F)(F)C(C)F)F)C(C)C(OC(C)C(F)(F)C(F)(F)C(F)(F)C(F)(F)C(F)(F)C(F)(F)C(F)(F)C(C)F)F)C(C)C(OC(C)C(F)(F)C(F)(F)C(F)(F)C(F)(F)C(F)(F)C(F)(F)C(F)(F)C(C)F)F)C(C)C(OC(C)C(F)(F)C(F)(F)C(F)(F)C(F)(F)C(F)(F)C(F)(F)C(F)(F)C(C)F)F)C(C)C(OC(C)C(F)(F)C(F)(F)C(F)(F)C(F)(F)C(F)(F)C(F)(F)C(F)(F)C(C)F)F)C(C)C(OC(C)C(F)(F)C(F)(F)C(F)(F)C(F)(F)C(F)(F)C(F)(F)C(F)(F)C(C)F)F)C(C)C(OC(C)C(F)(F)C(F)(F)C(F)(F)C(F)(F)C(F)(F)C(F)(F)C(F)(F)C(C)F)F)C(C)C(OC(C)C(F)(F)C(F)(F)C(F)(F)C(F)(F)C(F)(F)C(F)(F)C(F)(F)C(C)F)F)C(C)C(OC(C)C(F)(F)C(F)(F)C(F)(F)C(F)(F)C(F)(F)C(F)(F)C(F)(F)C(C)F)F)C(C)C(OC(C)C(F)(F)C(F)(F)C(F)(F)C(F)(F)C(F)(F)C(F)(F)C(F)(F)C(C)F)F)C(C)C(OC(C)C(F)(F)C(F)(F)C(F)(F)C(F)(F)C(F)(F)C(F)(F)C(F)(F)C(C)F)F)C(C)C(OC(C)C(F)(F)C(F)(F)C(F)(F)C(F)(F)C(F)(F)C(F)(F)C(F)(F)C(C)F)F)C(C)C(OC(C)C(F)(F)C(F)(F)C(F)(F)C(F)(F)C(F)(F)C(F)(F)C(F)(F)C(C)F)F)C(C)C(OC(C)C(F)(F)C(F)(F)C(F)(F)C(F)(F)C(F)(F)C(F)(F)C(F)(F)C(C)F)F)C(C)C(OC(C)C(F)(F)C(F)(F)C(F)(F)C(F)(F)C(F)(F)C(F)(F)C(F)(F)C(C)F)F)C(C)C(OC(C)C(F)(F)C(F)(F)C(F)(F)C(F)(F)C(F)(F)C(F)(F)C(F)(F)C(C)F)F)C(C)C(OC(C)C(F)(F)C(F)(F)C(F)(F)C(F)(F)C(F)(F)C(F)(F)C(F)(F)C(C)F)F)C(C)C(OC(C)C(F)(F)C(F)(F)C(F)(F)C(F)(F)C(F)(F)C(F)(F)C(F)(F)C(C)F)F)C(C)C(OC(C)C(F)(F)C(F)(F)C(F)(F)C(F)(F)C(F)(F)C(F)(F)C(F)(F)C(C)F)F)C(C)C(OC(C)C(F)(F)C(F)(F)C(F)(F)C(F)(F)C(F)(F)C(F)(F)C(F)(F)C(C)F)F)C(C)C(OC(C)C(F)(F)C(F)(F)C(F)(F)C(F)(F)C(F)(F)C(F)(F)C(F)(F)C(C)F)F)C(C)C(OC(C)C(F)(F)C(F)(F)C(F)(F)C(F)(F)C(F)(F)C(F)(F)C(F)(F)C(C)F)F)C(C)C(OC(C)C(F)(F)C(F)(F)C(F)(F)C(F)(F)C(F)(F)C(F)(F)C(F)(F)C(C)F)F)C(C)C(OC(C)C(F)(F)C(F)(F)C(F)(F)C(F)(F)C(F)(F)C(F)(F)C(F)(F)C(C)F)F)C(C)C(OC(C)C(F)(F)C(F)(F)C(F)(F)C(F)(F)C(F)(F)C(F)(F)C(F)(F)C(C)F)F)C(C)C(OC(C)C(F)(F)C(F)(F)C(F)(F)C(F)(F)C(F)(F)C(F)(F)C(F)(F)C(C)F)F)C(C)C(OC(C)C(F)(F)C(F)(F)C(F)(F)C(F)(F)C(F)(F)C(F)(F)C(F)(F)C(C)F)F)C(C)C(OC(C)C(F)(F)C(F)(F)C(F)(F)C(F)(F)C(F)(F)C(F)(F)C(F)(F)C(C)F)F)C(C)C(OC(C)C(F)(F)C(F)(F)C(F)(F)C(F)(F)C(F)(F)C(F)(F)C(F)(F)C(C)F)F)C(C)C(OC(C)C(F)(F)C(F)(F)C(F)(F)C(F)(F)C(F)(F)C(F)(F)C(F)(F)C(C)F)F)C(C)C(OC(C)C(F)(F)C(F)(F)C(F)(F)C(F)(F)C(F)(F)C(F)(F)C(F)(F)C(C)F)F)C(C)C(OC(C)C(F)(F)C(F)(F)C(F)(F)C(F)(F)C(F)(F)C(F)(F)C(F)(F)C(C)F)F)C(C)C(OC(C)C(F)(F)C(F)(F)C(F)(F)C(F)(F)C(F)(F)C(F)(F)C(F)(F)C(C)F)F)C(C)C(OC(C)C(F)(F)C(F)(F)C(F)(F)C(F)(F)C(F)(F)C(F)(F)C(F)(F)C(C)F)F)C(C)C(OC(C)C(F)(F)C(F)(F)C(F)(F)C(F)(F) |       |       |      |   |     |



[illegible]



|         |                                                                                                                   |              |                                                                                       |       |       |      |   |     |
|---------|-------------------------------------------------------------------------------------------------------------------|--------------|---------------------------------------------------------------------------------------|-------|-------|------|---|-----|
| QL01120 | 4-(1,1,2,3,3,3-Heptafluoropropan-2-yl)-2-methyl-3-(2-methylpropane-2-sulfonyl)benzoic acid                        | 1355554-59-4 | Cc1c(ccc(c1S(=O))=O)C(C)(C)C(F)(C)(F)(F)(F)(F)C(O)=O                                  | -5.75 | 16.67 | 2.11 | P | OUT |
| QL01121 | 4-(1,1,2,3,3,3-Heptafluoropropan-2-yl)-2-methyl-3-(2-methylpropane-2-sulfonyl)benzoic acid                        | 1355554-39-0 | Cc1c(ccc(c1S(=O)C(C)(C)C(F)(C)(F)(F)(F)(F)C(O)=O                                      | -5.78 | 17.07 | 2.12 | P | OUT |
| QL01122 | 4-(1,1,2,3,3,3-Heptafluoropropan-2-yl)-3-(methanesulfonyl)-2-methylbenzoic acid                                   | 1355554-41-4 | Cc1c(ccc(c1S(C)=O)=O)C(F)(C)(F)(F)(F)(F)C(O)=O                                        | -6.24 | 21.21 | 2.19 | P | OUT |
| QL01123 | 4-(1,1,2,3,3,3-Heptafluoropropan-2-yl)-3-(methanesulfonyl)-2-methylbenzoic acid                                   | 1355554-19-6 | Cc1c(ccc(c1S(C)=O)C(F)(C)(F)(F)(F)(F)C(O)=O                                           | -6.29 | 21.88 | 2.19 | P | OUT |
| QL01124 | 3-(tert-Butylsulfonyl)-4-(1,1,2,3,3,3-heptafluoropropan-2-yl)-2-methylbenzoic acid                                | 1355554-16-3 | Cc1c(ccc(c1SC(C)(C)C(F)(C)(F)(F)(F)(F)C(O)=O                                          | -5.80 | 17.50 | 2.11 | P | OUT |
| QL01125 | 3-Methyl-2-(nonafluorobutyl)-1H-indole                                                                            | 1622133-36-1 | Cc1c(Nc2cccc12)C(F)(F)(F)(F)(C(F)(F)(F)(F                                             | -6.91 | 29.03 | 2.25 | P | IN  |
| QL01126 | 2-(Heptafluoropropyl)-3-methyl-1H-indole                                                                          | 1030606-42-8 | Cc1c(Nc2cccc12)C(F)(F)(C(F)(F)(F)(F                                                   | -6.39 | 25.00 | 2.15 | P | OUT |
| QL01127 | 5-Methyl-6-[(3,4,4,5,5,6,6,7,7,8,8,8-tridecafluoroctyl)sulfonyl]hexahydro-4,7-methano-2-benzofuran-1,3-dione      | 94413-32-8   | CC1C2CC(C1SCCC(F)C(F)(F)(C(F)(F)(C(F)(F)C(F)(F)C1C2C(=O)OC1=O                         | -8.26 | 26.00 | 2.89 | P | OUT |
| QL01128 | 6-[(4,6-Dimethylpyrimidin-2-yl)sulfonyl]-3-(heptafluoropropyl)[1,2,4]triazolo[4,3-b]pyridazine                    | 351346-36-6  | Cc1cc(C)nc(Sc2ccc3nnc(n3n2)C(F)(F)(C(F)(F)(F)F)n1                                     | -7.28 | 18.92 | 2.68 | P | OUT |
| QL01129 | 2-Bromo-4-(1,1,2,3,3,3-heptafluoropropan-2-yl)-6-methylaniline                                                    | 1770825-71-2 | Cc1cc(cc(Br)c1N)C(F)(C)(F)(F)(F)(F)F                                                  | -6.17 | 30.77 | 1.90 | P | IN  |
| QL01130 | 2-Bromo-5-(1,1,2,3,3,3-heptafluoropropan-2-yl)-1,3-dimethylbenzene                                                | 353272-55-6  | Cc1cc(cc(C)c1Br)C(F)(C)(F)(F)(F)(F)F                                                  | -6.09 | 29.63 | 1.90 | P | IN  |
| QL01131 | 4-(1,1,2,3,3,3-Heptafluoropropan-2-yl)-2,6-dimethylbenzaldehyde                                                   | 1771743-29-3 | Cc1cc(cc(C)c1C=O)C(F)(C)(F)(F)(F)(F)F                                                 | -6.46 | 24.14 | 2.20 | P | OUT |
| QL01132 | 4-(1,1,2,3,3,3-Heptafluoropropan-2-yl)-2,6-dimethylaniline                                                        | 273735-43-6  | Cc1cc(cc(C)c1N)C(F)(C)(F)(F)(C(F)(F)F                                                 | -5.72 | 24.14 | 1.90 | P | OUT |
| QL01133 | 3-Benzamido-2,6-difluoro-N-[4-(1,1,2,3,3,3-heptafluoropropan-2-yl)-2,6-dimethylphenyl]benzamide                   | 862133-36-6  | Cc1cc(cc(C)c1NC(=O)c1c(F)ccc(NC(=O)c2ccccc2)c1F)C(F)(C)(F)(F)(C(F)(F)F                | -8.10 | 16.36 | 3.09 | P | OUT |
| QL01134 | 5-Benzamido-2,4-dibromo-N-[4-(1,1,2,3,3,3-heptafluoropropan-2-yl)-2,6-dimethylphenyl]benzamide                    | 862133-37-7  | Cc1cc(cc(C)c1NC(=O)c1cc(NC(=O)c2ccccc2)c(Br)cc1Br)C(F)(C)(F)(F)(C(F)(F)F              | -8.08 | 16.36 | 3.08 | P | OUT |
| QL01135 | 2,4-Difluoro-N-(2-fluoro-5-[[4-(1,1,2,3,3,3-heptafluoropropan-2-yl)-2,6-dimethylphenyl]carbamoyl]phenyl)benzamide | 862133-29-7  | Cc1cc(cc(C)c1NC(=O)c1ccc(F)c(NC(=O)c2ccc(F)cc2F)c1)C(F)(C)(F)(F)(C(F)(F)F             | -8.48 | 18.18 | 3.20 | P | OUT |
| QL01136 | 2,3,4,5,6-Pentafluoro-N-3-[[4-(1,1,2,3,3,3-heptafluoropropan-2-yl)-2,6-dimethylphenyl]carbamoyl]phenyl)benzamide  | 862130-96-9  | Cc1cc(cc(C)c1NC(=O)c1cccc(NC(=O)c2c(F)c(F)c(F)c2F)c1)C(F)(C)(F)(F)(C(F)(F)F           | -8.68 | 21.82 | 3.18 | P | OUT |
| QL01137 | 2,3,6-Trifluoro-N-(3-[[4-(1,1,2,3,3,3-heptafluoropropan-2-yl)-2,6-dimethylphenyl]carbamoyl]phenyl)benzamide       | 862130-95-8  | Cc1cc(cc(C)c1NC(=O)c1cccc(NC(=O)c2c(F)ccc(F)c2F)c1)C(F)(C)(F)(F)(C(F)(F)F             | -8.10 | 18.18 | 3.04 | P | OUT |
| QL01138 | 2,5-Difluoro-N-(3-[[4-(1,1,2,3,3,3-heptafluoropropan-2-yl)-2,6-dimethylphenyl]carbamoyl]phenyl)benzamide          | 862130-67-4  | Cc1cc(cc(C)c1NC(=O)c1cccc(NC(=O)c2cc(F)ccc2F)c1)C(F)(C)(F)(F)(C(F)(F)F                | -8.01 | 16.36 | 3.05 | P | OUT |
| QL01139 | 4-Chloro-N-(3-[[4-(1,1,2,3,3,3-heptafluoropropan-2-yl)-2,6-dimethylphenyl]carbamoyl]phenyl)-2-nitrobenzamide      | 862130-91-4  | Cc1cc(cc(C)c1NC(=O)c1cccc(NC(=O)c2ccc(Cl)cc2[N+])([O-])=O)c1)C(F)(C(F)(F)(F)(C(F)(F)F | -8.16 | 14.04 | 3.18 | P | OUT |
| QL01140 | 3-(4-Chloro-2-nitrobenzamido)-2-fluoro-N-[4-(1,1,2,3,3,3-heptafluoropropan-2-yl)-2,6-dimethylphenyl]benzamide     | 862133-18-4  | Cc1cc(cc(C)c1NC(=O)c1cccc(NC(=O)c2ccc(Cl)cc2[N+])([O-])=O)c1F)C(F)(C(F)(F)(C(F)(F)F   | -8.28 | 15.79 | 3.18 | P | OUT |
| QL01141 | 2,4-Dichloro-N-(3-[[4-(1,1,2,3,3,3-heptafluoropropan-2-yl)-2,6-dimethylphenyl]carbamoyl]phenyl)benzamide          | 862130-69-6  | Cc1cc(cc(C)c1NC(=O)c1cccc(NC(=O)c2ccc(Cl)cc2Cl)c1)C(F)(C(F)(F)(C(F)(F)F               | -8.34 | 16.36 | 3.19 | P | OUT |
| QL01142 | 4-Chloro-2-fluoro-N-(3-[[4-(1,1,2,3,3,3-heptafluoropropan-2-yl)-2,6-dimethylphenyl]carbamoyl]phenyl)benzamide     | 862130-90-3  | Cc1cc(cc(C)c1NC(=O)c1cccc(NC(=O)c2ccc(Cl)cc2F)c1)C(F)(C(F)(F)(C(F)(F)F                | -8.34 | 16.36 | 3.19 | P | OUT |
| QL01143 | 3-(4-Chloro-2-fluorobenzamido)-2-fluoro-N-[4-(1,1,2,3,3,3-heptafluoropropan-2-yl)-2,6-dimethylphenyl]benzamide    | 862133-16-2  | Cc1cc(cc(C)c1NC(=O)c1cccc(NC(=O)c2ccc(Cl)cc2F)c1)C(F)(C(F)(F)(F)(C(F)(F)F             | -8.46 | 18.18 | 3.19 | P | OUT |
| QL01144 | 2-Fluoro-3-(4-fluoro-2-nitrobenzamido)-N-[4-(1,1,2,3,3,3-heptafluoropropan-2-yl)-2,6-dimethylphenyl]benzamide     | 862133-14-0  | Cc1cc(cc(C)c1NC(=O)c1cccc(NC(=O)c2ccc(F)cc2[N+])([O-])=O)c1F)C(F)(C(F)(F)(C(F)(F)F    | -8.28 | 15.79 | 3.18 | P | OUT |
| QL01145 | 2-Chloro-4-fluoro-N-(3-[[4-(1,1,2,3,3,3-heptafluoropropan-2-yl)-2,6-dimethylphenyl]carbamoyl]phenyl)benzamide     | 862130-87-8  | Cc1cc(cc(C)c1NC(=O)c1cccc(NC(=O)c2ccc(F)cc2Cl)c1)C(F)(C(F)(F)(C(F)(F)F                | -8.34 | 16.36 | 3.19 | P | OUT |
| QL01146 | 3-(2-Chloro-4-fluorobenzamido)-2-fluoro-N-[4-(1,1,2,3,3,3-heptafluoropropan-2-yl)-2,6-dimethylphenyl]benzamide    | 862133-15-1  | Cc1cc(cc(C)c1NC(=O)c1cccc(NC(=O)c2ccc(F)cc2F)c1)C(F)(C(F)(F)(F)(C(F)(F)F              | -8.46 | 18.18 | 3.19 | P | OUT |
| QL01147 | 2,4-Difluoro-N-(3-[[4-(1,1,2,3,3,3-heptafluoropropan-2-yl)-2,6-dimethylphenyl]carbamoyl]phenyl)benzamide          | 862130-66-3  | Cc1cc(cc(C)c1NC(=O)c1cccc(NC(=O)c2ccc(F)cc2F)c1)C(F)(C(F)(F)(C(F)(F)F                 | -8.34 | 16.36 | 3.19 | P | OUT |
| QL01148 | 3-methyl-4-(2,2,3,3,4,4,5,5,5-nonafluoropentyl)cyclopentane-1,1-dicarboxylic Acid                                 | 20116-32-9   | CC1CC(CC1CC(F)(F)(C(F)(F)(C(F)(F)(F)(F)C(O)=O)C(O)=O                                  | -6.82 | 23.08 | 2.38 | P | OUT |



[illegible]















|         |                                                                                                                                     |              |                                                                                                                       |        |       |      |   |     |
|---------|-------------------------------------------------------------------------------------------------------------------------------------|--------------|-----------------------------------------------------------------------------------------------------------------------|--------|-------|------|---|-----|
|         | (7E)-9,9,10,10,11,11,12,12,13,13,14,14,15,15,16,16,16-Heptadecafluorohexadec-7-ene                                                  | 84201-60-5   | CCCCCCCC=CC(F)(F)C(F)(F)C(F)(F)C(F)(F)C(F)(F)C(F)(F)C(F)(F)F                                                          | -9.42  | 35.42 | 3.11 | P | IN  |
| QL01319 | 1,1,1,2,2,3,3,4,4,5,5,6,6-Tridecafluorotetradec-7-ene                                                                               | 120464-26-8  | CCCCCCCC=CC(F)(F)C(F)(F)C(F)(F)C(F)(F)C(F)(F)C(F)(F)C(F)(F)F                                                          | -8.63  | 30.95 | 2.90 | P | OUT |
| QL01320 | (5E)-1,1,1,2,2,3,3,4,4-Nonafluorododec-5-ene                                                                                        | 113999-54-5  | CCCCCCCC=CC(F)(F)C(F)(F)C(F)(F)C(F)(F)F                                                                               | -7.68  | 25.00 | 2.68 | P | OUT |
| QL01322 | 1,1,1,2,2,3,3,4,4,5,5,6,6,7,7,8,8,9,9,10,10-Henicosafuoroheptadecane                                                                | 200817-54-5  | CCCCCCCC(F)(F)C(F)(F)C(F)(F)C(F)(F)C(F)(F)C(F)(F)C(F)(F)C(F)(F)F                                                      | -9.73  | 39.62 | 3.12 | P | IN  |
| QL01323 | 1,1,1,2,2,3,3,4,4,5,5,6,6,7,7,8,8-Heptadecafluoropentadecane                                                                        | 182130-15-0  | CCCCCCCC(F)(F)C(F)(F)C(F)(F)C(F)(F)C(F)(F)C(F)(F)C(F)(F)F                                                             | -9.10  | 36.17 | 2.95 | P | IN  |
| QL01324 | 1,1,1,2,2,3,3,4,4,5,5,6,6,7,7-Pentadecafluorotetradecane                                                                            | 38787-57-4   | CCCCCCCC(F)(F)C(F)(F)C(F)(F)C(F)(F)C(F)(F)C(F)(F)C(F)(F)F                                                             | -8.90  | 34.09 | 2.93 | P | IN  |
| QL01325 | 1,1,1,2,2,3,3,4,4,5,5,6,6-Tridecafluorotrdecane                                                                                     | 1835249-87-0 | CCCCCCCC(F)(F)C(F)(F)C(F)(F)C(F)(F)C(F)(F)C(F)(F)C(F)(F)F                                                             | -8.37  | 31.71 | 2.78 | P | IN  |
| QL01326 | 1,1,1,2,2,3,3,4,4-Nonafluoroundecane                                                                                                | 1190430-22-8 | CCCCCCCC(F)(F)C(F)(F)C(F)(F)C(F)(F)F                                                                                  | -7.35  | 25.71 | 2.52 | P | OUT |
| QL01327 | 1,1,1,2,2,3,3,4,4,5,5,6,6,7,7,8,8,9,9,10,10-Henicosafluoro-12-iodononadecane                                                        | 129838-41-1  | CCCCCCCCC(I)CC(F)(F)C(F)(F)C(F)(F)C(F)(F)C(F)(F)C(F)(F)C(F)(F)C(F)(F)F                                                | -9.97  | 37.29 | 3.28 | P | IN  |
| QL01328 | 1,1,1,2,2,3,3,4,4-Nonafluorododecan-5-ol                                                                                            | 131294-52-5  | CCCCCCCCC(O)C(F)(F)C(F)(F)C(F)(F)C(F)(F)F                                                                             | -7.60  | 23.08 | 2.70 | P | OUT |
| QL01329 | N,N,N-Trimethyloctan-1-aminium pentadecafluorooctanoate                                                                             | 927835-01-6  | CCCCCCCC[N+](C)(C)[C-].[O-]C(=O)C(F)(F)C(F)(F)C(F)(F)C(F)(F)C(F)(F)C(F)(F)F                                           | -6.62  | 23.81 | 2.28 | P | OUT |
| QL01330 | 1,1,1,2,2,3,3,4,4,5,5,6,6-Tridecafluoropentadec-7-ene                                                                               | 1980786-99-9 | CCCCCCCC=CC(F)(F)C(F)(F)C(F)(F)C(F)(F)C(F)(F)C(F)(F)F                                                                 | -8.60  | 28.89 | 2.95 | P | OUT |
| QL01331 | 1,1,1,2,2,3,3,4,4,5,5,6,6,7,7,8,8,9,9,10,10,11,11,12,12-Pentacosafluoroicosane                                                      | 90499-31-3   | CCCCCCCCC(F)(F)C(F)(F)C(F)(F)C(F)(F)C(F)(F)C(F)(F)C(F)(F)C(F)(F)C(F)(F)C(F)(F)F                                       | -10.42 | 40.32 | 3.38 | P | OUT |
| QL01332 | 1,1,1,2,2,3,3,4,4,5,5,6,6,7,7,8,8,9,9,10,10-Henicosafuorooctadecane                                                                 | 93454-70-7   | CCCCCCCCC(F)(F)C(F)(F)C(F)(F)C(F)(F)C(F)(F)C(F)(F)C(F)(F)C(F)(F)F                                                     | -9.90  | 37.50 | 3.25 | P | IN  |
| QL01333 | 1,1,1,2,2,3,3,4,4-Nonafluorododecane                                                                                                | 69125-79-7   | CCCCCCCCC(F)(F)C(F)(F)C(F)(F)C(F)(F)F                                                                                 | -7.59  | 23.68 | 2.68 | P | OUT |
| QL01334 | 1,1,1,2,2,3,3-Heptafluoroundecane                                                                                                   | 1190430-20-6 | CCCCCCCCC(F)(F)C(F)(F)C(F)(F)F                                                                                        | -6.92  | 20.00 | 2.50 | P | OUT |
| QL01335 | 1,1,1,2,2,3,3,4,4,5,5,6,6,7,7,8,8,9,9,10,10-Henicosafuoro-12-iodoicosane                                                            | 121633-31-6  | CCCCCCCCC(I)CC(F)(F)C(F)(F)C(F)(F)C(F)(F)C(F)(F)C(F)(F)C(F)(F)C(F)(F)F                                                | -10.14 | 35.48 | 3.40 | P | OUT |
| QL01336 | 1,1,1,2,2,3,3,4,4,5,5,6,6,7,7,8,8-Heptadecafluoro-10-iodooctadecane                                                                 | 176979-17-2  | CCCCCCCCC(I)CC(F)(F)C(F)(F)C(F)(F)C(F)(F)C(F)(F)C(F)(F)C(F)(F)F                                                       | -9.52  | 32.14 | 3.24 | P | OUT |
| QL01337 | 1,1,1,2,2,3,3,4,4,5,5,6,6-Tridecafluoro-8-iodohexadecane                                                                            | 207122-00-7  | CCCCCCCCC(I)CC(F)(F)C(F)(F)C(F)(F)C(F)(F)C(F)(F)C(F)(F)F                                                              | -8.86  | 28.00 | 3.08 | P | OUT |
| QL01338 | (Z)-Octadec-9-enyl [5-(((2-((perfluorooctyl)sulphonyl)methylamino)ethoxy)carbo nyl)amino)-o-tolyl]carbamate                         | 94313-84-5   | CCCCCCCCC=C/C(C)CCCCCCCCC(=O)NC1=C(NC(=O)OCCN(C)S(=O)(=O)C(F)(F)C(F)(F)C(F)(F)C(F)(F)J)C(F)(F)C(F)(F)C(F)(F)F)=CC=C1C | -10.86 | 14.78 | 4.27 | P | OUT |
| QL01339 | (9E)-1,1,1,2,2,3,3,4,4,5,5,6,6,7,7,8,8-Heptadecafluorooctadec-9-ene                                                                 | 113999-61-4  | CCCCCCCCC=CC(F)(F)C(F)(F)C(F)(F)C(F)(F)C(F)(F)C(F)(F)C(F)(F)C(F)(F)F                                                  | -9.49  | 31.48 | 3.24 | P | OUT |
| QL01340 | 1,1,1,2,2,3,3,4,4,5,5,6,6,7,7-Pentadecafluoroheptadec-8-ene                                                                         | 52717-06-3   | CCCCCCCCC=CC(F)(F)C(F)(F)C(F)(F)C(F)(F)C(F)(F)C(F)(F)C(F)(F)F                                                         | -9.06  | 29.41 | 3.13 | P | OUT |
| QL01341 | 1,1,1,2,2,3,3,4,4,5,5,6,6-tridecafluorohexadec-7-ene                                                                                | 120464-27-9  | CCCCCCCCC=CC(F)(F)C(F)(F)C(F)(F)C(F)(F)C(F)(F)C(F)(F)C(F)(F)F                                                         | -8.76  | 27.08 | 3.06 | P | OUT |
| QL01343 | (5E)-1,1,1,2,2,3,3,4,4-Nonafluorotetradec-5-ene                                                                                     | 104504-30-5  | CCCCCCCCC=CC(F)(F)C(F)(F)C(F)(F)F                                                                                     | -7.91  | 21.43 | 2.87 | P | OUT |
| QL01344 | Carbamic acid, [5-[[(2-[[[heptadecafluoroisooctyl)sulfonyl]methylamino]ethoxy]carbonyl]amino]-2-methylphenyl]-, 9-octadecenyl ester | 93894-74-7   | CCCCCCCCC=CCCCCCCCCOC(=O)NC1=C(NC(=O)OCCN(C)S(=O)(=O)C(F)(F)C(F)(F)C(F)(F)C(F)(F)C(F)(F)C(F)(F)C(F)(F)F)=CC=C1C       | -10.72 | 14.78 | 4.22 | P | OUT |
| QL01345 | 1,1,1,2,2,3,3,4,4,5,5,6,6,7,7,8,8,9,9,10,10,11,11,12,12,13,13-Heptacosafluorodocosane                                               | 1309378-06-0 | CCCCCCCCC(F)(F)C(F)(F)C(F)(F)C(F)(F)C(F)(F)C(F)(F)C(F)(F)C(F)(F)C(F)(F)C(F)(F)C(F)(F)F                                | -10.69 | 39.71 | 3.51 | P | OUT |
| QL01346 | 1,1,1,2,2,3,3,4,4,5,5,6,6,7,7,8,8,9,9,10,10,11,11,12,12-Pentacosafluorohenicosane                                                   | 677324-30-0  | CCCCCCCCC(F)(F)C(F)(F)C(F)(F)C(F)(F)C(F)(F)C(F)(F)C(F)(F)C(F)(F)C(F)(F)C(F)(F)F                                       | -10.37 | 38.46 | 3.41 | P | OUT |
| QL01347 | 1,1,1,2,2,3,3,4,4,5,5,6,6,7,7,8,8,9,9,10,10-Henicosafuorononadecane                                                                 | 125635-85-0  | CCCCCCCCC(F)(F)C(F)(F)C(F)(F)C(F)(F)C(F)(F)C(F)(F)C(F)(F)C(F)(F)F                                                     | -9.86  | 35.59 | 3.28 | P | OUT |
| QL01348 | 1,1,1,2,2,3,3,4,4,5,5,6,6,7,7,8,8,9,9-Nonadecafluorooctadecane                                                                      | 1287702-47-9 | CCCCCCCCC(F)(F)C(F)(F)C(F)(F)C(F)(F)C(F)(F)C(F)(F)C(F)(F)C(F)(F)F                                                     | -9.70  | 33.93 | 3.26 | P | OUT |
| QL01349 | 1,1,1,2,2,3,3,4,4,5,5,6,6,7,7,8,8-Heptadecafluoroheptadecane                                                                        | 931415-52-0  | CCCCCCCCC(F)(F)C(F)(F)C(F)(F)C(F)(F)C(F)(F)C(F)(F)C(F)(F)F                                                            | -9.29  | 32.08 | 3.15 | P | OUT |
| QL01350 | 1,1,1,2,2,3,3,4,4,5,5,6,6-Tridecafluoropentadecane                                                                                  | 113659-13-5  | CCCCCCCCC(F)(F)C(F)(F)C(F)(F)C(F)(F)C(F)(F)C(F)(F)F                                                                   | -8.52  | 27.66 | 2.95 | P | OUT |
| QL01351 | 1,1,1,2,2,3,3,4,4-Nonafluorotrdecane                                                                                                | 234433-63-7  | CCCCCCCCC(F)(F)C(F)(F)C(F)(F)C(F)(F)F                                                                                 | -7.61  | 21.95 | 2.73 | P | OUT |
| QL01352 | 1,1,1,2,2,3,3-Heptafluorododecane                                                                                                   | 69125-78-6   | CCCCCCCCC(F)(F)C(F)(F)C(F)(F)F                                                                                        | -7.21  | 18.42 | 2.67 | P | OUT |
| QL01353 | 1,1,1,2,2,3,3,4,4,5,5,6,6,7,7,8,8,9,9,10,10-Henicosafluoro-12-iodohenicosane                                                        | 129838-42-2  | CCCCCCCCC(I)CC(F)(F)C(F)(F)C(F)(F)C(F)(F)C(F)(F)C(F)(F)C(F)(F)C(F)(F)F                                                | -10.11 | 33.85 | 3.44 | P | OUT |
| QL01354 | 1,1,1,2,2,3,3,4,4,5,5,6,6-Tridecafluoro-8-iodoheptadecane                                                                           | 207122-01-8  | CCCCCCCCC(I)CC(F)(F)C(F)(F)C(F)(F)C(F)(F)C(F)(F)C(F)(F)F                                                              | -8.86  | 26.42 | 3.12 | P | OUT |
| QL01355 | N-Decyl-N,N-dimethyl-1-decanaminium perfluorooctanesulfonate                                                                        | 251099-16-8  | CCCCCCCCC[N+](C)(C)CCCCCCCCC.[O-]S(=O)(=O)C(F)(F)C(F)(F)C(F)(F)C(F)(F)C(F)(F)C(F)(F)C(F)(F)F                          | -9.80  | 17.00 | 3.77 | P | OUT |
| QL01356 | N,N,N-Triethyldecan-1-aminium heptadecafluorooctane-1-sulfonate                                                                     | 773895-92-4  | CCCCCCCCC[N+](CC)(CC)CC.[O-]S(=O)(=O)C(F)(F)C(F)(F)C(F)(F)C(F)(F)C(F)(F)C(F)(F)F                                      | -7.78  | 20.73 | 2.84 | P | OUT |
| QL01357 | 1,1,1,2,2,3,3,4,4,5,5,6,6,7,7,8,8,9,9,10,10,11,11,12,12-Pentacosafluorodocosane                                                     | 93454-72-9   | CCCCCCCCC(F)(F)C(F)(F)C(F)(F)C(F)(F)C(F)(F)C(F)(F)C(F)(F)C(F)(F)C(F)(F)F                                              | -10.52 | 36.76 | 3.52 | P | OUT |
| QL01358 | 1,1,1,2,2,3,3,4,4,5,5,6,6,7,7,8,8,9,9,10,10-Henicosafuoroicosane                                                                    | 90499-29-9   | CCCCCCCCC(F)(F)C(F)(F)C(F)(F)C(F)(F)C(F)(F)C(F)(F)C(F)(F)C(F)(F)F                                                     | -10.04 | 33.87 | 3.41 | P | OUT |
| QL01359 | 1-(Perfluoro-n-octyl)decane                                                                                                         | 138472-76-1  | CCCCCCCCC(F)(F)C(F)(F)C(F)(F)C(F)(F)C(F)(F)C(F)(F)C(F)(F)F                                                            | -9.41  | 30.36 | 3.24 | P | OUT |
| QL01360 | 1,1,1,2,2,3,3,4,4,5,5,6,6-Tridecafluorohexadecane                                                                                   | 147492-59-9  | CCCCCCCCC(F)(F)C(F)(F)C(F)(F)C(F)(F)C(F)(F)F                                                                          | -8.69  | 26.00 | 3.06 | P | OUT |
| QL01361 | 1,1,1,2,2,3,3,4,4-Nonafluorotetradecane                                                                                             | 214196-02-8  | CCCCCCCCC(F)(F)C(F)(F)C(F)(F)F                                                                                        | -7.84  | 20.45 | 2.87 | P | OUT |



|         |                                                                                          |              |                                                                                     |        |       |      |   |     |
|---------|------------------------------------------------------------------------------------------|--------------|-------------------------------------------------------------------------------------|--------|-------|------|---|-----|
| QL01362 | 1,1,1,2,2,3,3,4,4,5,5,6,6,7,7,8,8,9,9,10,10-Henicosafuoro-12-iododocosane                | 129838-43-3  | CCCCCCCCCCCC(I)CC(F)(F)C(F)(F)C(F)(F)C(F)(F)C(F)(F)C(F)(F)C(F)(F)C(F)(F)F           | -10.20 | 32.35 | 3.51 | P | OUT |
| QL01363 | 1,1,1,2,2,3,3,4,4,5,5,6,6,7,7,8,8-Heptadecafluoro-10-iodoicosane                         | 1257261-93-0 | CCCCCCCCCCCC(I)CC(F)(F)C(F)(F)C(F)(F)C(F)(F)C(F)(F)C(F)(F)C(F)(F)F                  | -9.67  | 29.03 | 3.39 | P | OUT |
| QL01364 | 1,1,1,2,2,3,3,4,4,5,5,6,6,7,7-Pentadecafluoro-9-iodononadecane                           | 25431-52-1   | CCCCCCCCCCCC(I)CC(F)(F)C(F)(F)C(F)(F)C(F)(F)C(F)(F)C(F)(F)F                         | -9.28  | 27.12 | 3.28 | P | OUT |
| QL01365 | 1,1,1,2,2,3,3,4,4,5,5,6,6,7,7,8,8-Heptadecafluoro-8-iodooctadecane                       | 125081-35-8  | CCCCCCCCCCCC(I)CC(F)(F)C(F)(F)C(F)(F)C(F)(F)C(F)(F)C(F)(F)F                         | -9.01  | 25.00 | 3.23 | P | OUT |
| QL01366 | 1,1,1,2,2,3,3,4,4,5,5,6,6,7,7,8,8-Heptadecafluoroicos-9-ene                              | 1789721-11-4 | CCCCCCCCCCCC(I)CC(F)(F)C(F)(F)C(F)(F)C(F)(F)F                                       | -8.26  | 20.00 | 3.06 | P | OUT |
| QL01367 | 1,1,1,2,2,3,3,4,4,5,5,6,6,7,8,8-Heptadecafluoroicos-9-ene                                | 124921-25-1  | CCCCCCCCCCCC=CC(F)(F)C(F)(F)C(F)(F)C(F)(F)C(F)(F)C(F)(F)C(F)(F)F                    | -9.59  | 28.33 | 3.37 | P | OUT |
| QL01368 | 1,1,1,2,2,3,3,4,4,5,5,6,6,7,7,8,8-Heptadecafluoroicos-9-ene                              | 125081-49-4  | CCCCCCCCCCCC=CC(F)(F)C(F)(F)C(F)(F)C(F)(F)C(F)(F)C(F)(F)C(F)(F)F                    | -8.91  | 24.07 | 3.21 | P | OUT |
| QL01369 | 1,1,1,2,2,3,3,4,4,5,5,6,6,7,7,8,8,9,9,10,10,11,11,12,12-Pentacosafuorotricosane          | 131851-20-2  | CCCCCCCCCCCC=CC(F)(F)C(F)(F)C(F)(F)C(F)(F)C(F)(F)C(F)(F)C(F)(F)C(F)(F)C(F)(F)F      | -8.15  | 18.75 | 3.04 | P | OUT |
| QL01370 | 1,1,1,2,2,3,3,4,4,5,5,6,6,7,7,8,8,9,9,10,10-Henicosafuorohenicicosane                    | 677324-31-1  | CCCCCCCCCCCCC(F)(F)C(F)(F)C(F)(F)C(F)(F)C(F)(F)C(F)(F)C(F)(F)C(F)(F)C(F)(F)F        | -10.49 | 35.21 | 3.55 | P | OUT |
| QL01371 | 1,1,1,2,2,3,3,4,4,5,5,6,6,7,7,8,8-Heptadecafluorononadecane                              | 125635-86-1  | CCCCCCCCCCCCC(F)(F)C(F)(F)C(F)(F)C(F)(F)C(F)(F)C(F)(F)C(F)(F)C(F)(F)F               | -10.02 | 32.31 | 3.44 | P | OUT |
| QL01372 | 1,1,1,2,2,3,3,4,4,5,5,6,6,7,7,8,8-Heptadecafluorononadecane                              | 931415-53-1  | CCCCCCCCCCCCC(F)(F)C(F)(F)C(F)(F)C(F)(F)C(F)(F)C(F)(F)C(F)(F)F                      | -9.40  | 28.81 | 3.28 | P | OUT |
| QL01373 | 1,1,1,2,2,3,3,4,4,5,5,6,6,7,7,8,8,9,9,10,10,11,11,12,12,13-Tridecafluoroheptylsilylester | 94094-26-5   | CCCCCCCCCCCCC(C(=O)=O)[Si](C)(CC(F)(F)C(F)(F)C(F)(F)C(F)(F)C(CCCCCCCCCCCC)C(=O)=O   | -8.84  | 8.18  | 3.62 | P | OUT |
| QL01374 | 1,1,1,2,2,3,3,4,4,5,5,6,6,7,7,8,8,9,9,10,10,11,11,12,12,13-Tridecafluoroheptylsilylester | 94094-26-5   | CCCCCCCCCCCCC(C(=O)=O)[Si](C)(CC(F)(F)C(F)(F)C(F)(F)C(F)(F)C(CCCCCCCCCCCC)C(=O)=O   | -8.84  | 8.18  | 3.62 | P | OUT |
| QL01374 | 1,1,1,2,2,3,3,4,4,5,5,6,6,7,7,8,8,9,9,10,10,11,11,12,12-Pentacosafuoropentacosane        | 677324-22-0  | CCCCCCCCCCCCC(F)(F)C(F)(F)C(F)(F)C(F)(F)C(F)(F)C(F)(F)C(F)(F)C(F)(F)C(F)(F)C(F)(F)F | -10.77 | 35.06 | 3.67 | P | OUT |
| QL01375 | 1,1,1,2,2,3,3,4,4,5,5,6,6,7,7,8,8,9,9,10,10,11,11-Pentacosafuorotetracosane              | 89109-71-7   | CCCCCCCCCCCCC(F)(F)C(F)(F)C(F)(F)C(F)(F)C(F)(F)C(F)(F)C(F)(F)C(F)(F)C(F)(F)F        | -10.64 | 33.78 | 3.66 | P | OUT |
| QL01376 | 1,1,1,2,2,3,3,4,4,5,5,6,6,7,7,8,8,9,9,10,10,11-Tricosafuorotricosane                     | 677324-21-9  | CCCCCCCCCCCCC(F)(F)C(F)(F)C(F)(F)C(F)(F)C(F)(F)C(F)(F)C(F)(F)C(F)(F)C(F)(F)F        | -10.34 | 32.39 | 3.57 | P | OUT |
| QL01377 | 1,1,1,2,2,3,3,4,4,5,5,6,6,7,7,8,8,9,9,10-Henicosafuorodocosane                           | 93454-71-8   | CCCCCCCCCCCCC(F)(F)C(F)(F)C(F)(F)C(F)(F)C(F)(F)C(F)(F)C(F)(F)C(F)(F)F               | -10.12 | 30.88 | 3.52 | P | OUT |
| QL01378 | 1,1,1,2,2,3,3,4,4,5,5,6,6,7,7,8,8,9,9-Nonadecafluorohenicicosane                         | 677324-20-8  | CCCCCCCCCCCCC(F)(F)C(F)(F)C(F)(F)C(F)(F)C(F)(F)C(F)(F)C(F)(F)C(F)(F)F               | -9.77  | 29.23 | 3.42 | P | OUT |
| QL01379 | 1-(Perfluoro-n-octyl)dodecane                                                            | 106873-67-0  | CCCCCCCCCCCCC(F)(F)C(F)(F)C(F)(F)C(F)(F)C(F)(F)C(F)(F)C(F)(F)F                      | -9.53  | 27.42 | 3.37 | P | OUT |
| QL01380 | 1,1,1,2,2,3,3,4,4,5,5,6,6,7,7-Pentadecafluorononadecane                                  | 109856-51-1  | CCCCCCCCCCCCC(F)(F)C(F)(F)C(F)(F)C(F)(F)C(F)(F)C(F)(F)F                             | -9.13  | 25.42 | 3.26 | P | OUT |
| QL01381 | 1-(Perfluoro-n-hexyl)dodecane                                                            | 90499-30-2   | CCCCCCCCCCCCC(F)(F)C(F)(F)C(F)(F)C(F)(F)C(F)(F)F                                    | -8.86  | 23.21 | 3.21 | P | OUT |
| QL01382 | 1,1,1,2,2,3,3,4,4-Nonafluorohexadecane                                                   | 106873-68-1  | CCCCCCCCCCCCC(F)(F)C(F)(F)C(F)(F)C(F)(F)F                                           | -8.10  | 18.00 | 3.04 | P | OUT |
| QL01383 | 1,1,1,2,2,3,3-Heptafluoropentadecane                                                     | 106873-69-2  | CCCCCCCCCCCCC(F)(F)C(F)(F)C(F)(F)F                                                  | -7.57  | 14.89 | 2.91 | P | OUT |
| QL01384 | 1,1,1,2,2,3,3,4,4,5,5,6,6,7,7,8,8,9,9,10,10-Henicosafuoro-12-iodotetracosane             | 1257261-92-9 | CCCCCCCCCCCCC(I)CC(F)(F)C(F)(F)C(F)(F)C(F)(F)C(F)(F)C(F)(F)C(F)(F)C(F)(F)F          | -10.33 | 29.73 | 3.64 | P | OUT |
| QL01385 | 1,1,1,2,2,3,3,4,4,5,5,6,6,7,7,8,8-Heptadecafluoro-10-iododocosane                        | 176979-18-3  | CCCCCCCCCCCCC(I)CC(F)(F)C(F)(F)C(F)(F)C(F)(F)C(F)(F)C(F)(F)C(F)(F)F                 | -9.78  | 26.47 | 3.50 | P | OUT |
| QL01386 | 2-(o-Cyanophenoxy)-3'-hydroxy-4'-(perfluorobutyl)aminotetradecanamide                    | 117844-18-5  | CCCCCCCCCCCCC(OC1=C(C=CC=C1)CN(O)=N/C1=CC(O)=C(NC(=O)C(F)(F)C(F)(F)C(F)(F)C=C1      | -8.80  | 8.64  | 3.59 | P | OUT |
| QL01387 | 1,1,1,2,2,3,3,4,4,5,5,6,6,7,7,8,8-Heptadecafluoro-9-ene                                  | 118642-84-5  | CCCCCCCCCCCC=CC(F)(F)C(F)(F)C(F)(F)C(F)(F)C(F)(F)C(F)(F)F                           | -9.70  | 25.76 | 3.49 | P | OUT |
| QL01388 | 1,1,1,2,2,3,3,4,4,5,5,6,6,7,7,8,8-Heptadecafluoro-7-ene                                  | 160460-04-8  | CCCCCCCCCCCC=CC(F)(F)C(F)(F)C(F)(F)C(F)(F)C(F)(F)C(F)(F)F                           | -9.08  | 21.67 | 3.35 | P | OUT |
| QL01389 | 1,1,1,2,2,3,3,4,4-Nonafluoroctadec-5-ene                                                 | 160460-03-7  | CCCCCCCCCCCC=CC(F)(F)C(F)(F)C(F)(F)C(F)(F)F                                         | -8.38  | 16.67 | 3.20 | P | OUT |
| QL01390 | 1,1,1,2,2,3,3,4,4,5,5,6,6,7,7,8,8,9,9,10,10,11,11,12,12-Pentacosafuoropentacosane        | 116177-47-0  | CCCCCCCCCCCCC(F)(F)C(F)(F)C(F)(F)C(F)(F)C(F)(F)C(F)(F)C(F)(F)C(F)(F)C(F)(F)F        | -10.62 | 32.47 | 3.68 | P | OUT |
| QL01391 | 1,1,1,2,2,3,3,4,4,5,5,6,6,7,7,8,8,9,9,10,10-Henicosafuorotricosane                       | 200817-55-6  | CCCCCCCCCCCCC(F)(F)C(F)(F)C(F)(F)C(F)(F)C(F)(F)C(F)(F)C(F)(F)C(F)(F)F               | -10.10 | 29.58 | 3.55 | P | OUT |
| QL01392 | 1,1,1,2,2,3,3,4,4,5,5,6,6,7,7,8,8-Heptadecafluorohenicicosane                            | 871311-23-8  | CCCCCCCCCCCCC(F)(F)C(F)(F)C(F)(F)C(F)(F)C(F)(F)C(F)(F)C(F)(F)F                      | -9.52  | 26.15 | 3.41 | P | OUT |
| QL01394 | 1,1,1,2,2,3,3,4,4,5,5,6,6,7,7,8,8,9,9,10,10,11,11,12,12-Pentacosafuorohexacosane         | 93454-73-0   | CCCCCCCCCCCCC(F)(F)C(F)(F)C(F)(F)C(F)(F)C(F)(F)C(F)(F)C(F)(F)C(F)(F)C(F)(F)F        | -10.70 | 31.25 | 3.75 | P | OUT |
| QL01395 | 1,1,1,2,2,3,3,4,4,5,5,6,6,7,7,8,8,9,9,10,10-Henicosafuorotetracosane                     | 200817-56-7  | CCCCCCCCCCCCC(F)(F)C(F)(F)C(F)(F)C(F)(F)C(F)(F)C(F)(F)C(F)(F)C(F)(F)F               | -10.21 | 28.38 | 3.63 | P | OUT |
| QL01396 | 1-(Perfluoro-n-octyl)tetradecane                                                         | 133310-72-2  | CCCCCCCCCCCCC(F)(F)C(F)(F)C(F)(F)C(F)(F)C(F)(F)C(F)(F)F                             | -9.65  | 25.00 | 3.49 | P | OUT |
| QL01397 | 1,1,1,2,2,3,3,4,4,5,5,6,6-Tridecafluoroicosane                                           | 154628-00-9  | CCCCCCCCCCCCC(F)(F)C(F)(F)C(F)(F)C(F)(F)C(F)(F)F                                    | -9.03  | 20.97 | 3.35 | P | OUT |
| QL01398 | 1,1,1,2,2,3,3,4,4,5,5-Undecafluorononadecane                                             | 112344-48-6  | CCCCCCCCCCCCC(F)(F)C(F)(F)C(F)(F)C(F)(F)F                                           | -8.62  | 18.64 | 3.24 | P | OUT |
| QL01399 | 1,1,1,2,2,3,3,4,4-Nonafluoroctadecane                                                    | 133310-68-6  | CCCCCCCCCCCCC(F)(F)C(F)(F)C(F)(F)F                                                  | -8.34  | 16.07 | 3.20 | P | OUT |
| QL01400 | 1,1,1,2,2,3,3,4,4,5,5,6,6,7,7,8,8,9,9,10,10-Henicosafuoro-12-iodohexacosane              | 1257261-91-8 | CCCCCCCCCCCCC(I)CC(F)(F)C(F)(F)C(F)(F)C(F)(F)C(F)(F)C(F)(F)C(F)(F)C(F)(F)F          | -10.42 | 27.50 | 3.74 | P | OUT |
| QL01401 | 1,1,1,2,2,3,3,4,4,5,5,6,6,7,7-Pentadecafluoro-9-iodotricosane                            | 1257261-94-1 | CCCCCCCCCCCCC(I)CC(F)(F)C(F)(F)C(F)(F)C(F)(F)C(F)(F)C(F)(F)F                        | -9.90  | 24.32 | 3.61 | P | OUT |
| QL01402 | 1,1,1,2,2,3,3,4,4,5,5,6,6,7,7,8,8,9,9,10,10,11,11,12,12-Pentacosafuoroicos-13-ene        | 57325-43-6   | CCCCCCCCCCCCC(I)CC(F)(F)C(F)(F)C(F)(F)C(F)(F)C(F)(F)C(F)(F)F                        | -9.56  | 22.54 | 3.52 | P | OUT |
| QL01403 | 1,1,1,2,2,3,3,4,4,5,5,6,6,7,7,8,8,9,9,10,10-Henicosafuorohexacos-11-ene                  | 1151525-71-1 | CCCCCCCCCCCCC=CC(F)(F)C(F)(F)C(F)(F)C(F)(F)C(F)(F)C(F)(F)C(F)(F)C(F)(F)F            | -10.82 | 29.76 | 3.84 | P | OUT |
| QL01404 | 1,1,1,2,2,3,3,4,4,5,5,6,6,7,7,8,8,9,9,10,10-Henicosafuorohexacos-11-ene                  | 1244062-18-7 | CCCCCCCCCCCCC=CC(F)(F)C(F)(F)C(F)(F)C(F)(F)C(F)(F)C(F)(F)C(F)(F)C(F)(F)F            | -10.35 | 26.92 | 3.72 | P | OUT |
| QL01405 | 1,1,1,2,2,3,3,4,4,5,5,6,6,7,7,8,8-Heptadecafluorotetracos-9-ene                          | 1244062-16-5 | CCCCCCCCCCCCC=CC(F)(F)C(F)(F)C(F)(F)C(F)(F)C(F)(F)C(F)(F)F                          | -9.83  | 23.61 | 3.60 | P | OUT |



[illegible]



[illegible]



[illegible]



[illegible]



|         |                                                                                                                                                                 |              |                                                                                                                                                                                                                                                                                                                                                                                                                                                                                                                                                                                                                                                                                                                                                                                                                                                                                                                                                                                                                                                                                                                                                                                                                                                                                                                                                                                                                                                                                                                                                                                                                                                                                                                                                                                                                                                                                                                                                                                                                                                                                                                                                                                                                                                                                                                                                                                                                                                                                                                                                                                                                                                                                                                                                                                                                                                                                                                                                                                                                                                                                                                                                                                                                                                                                                                                                                                                                                                                                                                                                                                                                                                                                                                                                                                                                                                                                                                                                                                                                                                                                                                                                                                                                                                                                                                                                                                                                                                                                                                                                                                                                                                                                                                                                                                                                                                                                                                                                                                                                                                                                                                                                                                                                                                         |        |       |      |   |     |
|---------|-----------------------------------------------------------------------------------------------------------------------------------------------------------------|--------------|---------------------------------------------------------------------------------------------------------------------------------------------------------------------------------------------------------------------------------------------------------------------------------------------------------------------------------------------------------------------------------------------------------------------------------------------------------------------------------------------------------------------------------------------------------------------------------------------------------------------------------------------------------------------------------------------------------------------------------------------------------------------------------------------------------------------------------------------------------------------------------------------------------------------------------------------------------------------------------------------------------------------------------------------------------------------------------------------------------------------------------------------------------------------------------------------------------------------------------------------------------------------------------------------------------------------------------------------------------------------------------------------------------------------------------------------------------------------------------------------------------------------------------------------------------------------------------------------------------------------------------------------------------------------------------------------------------------------------------------------------------------------------------------------------------------------------------------------------------------------------------------------------------------------------------------------------------------------------------------------------------------------------------------------------------------------------------------------------------------------------------------------------------------------------------------------------------------------------------------------------------------------------------------------------------------------------------------------------------------------------------------------------------------------------------------------------------------------------------------------------------------------------------------------------------------------------------------------------------------------------------------------------------------------------------------------------------------------------------------------------------------------------------------------------------------------------------------------------------------------------------------------------------------------------------------------------------------------------------------------------------------------------------------------------------------------------------------------------------------------------------------------------------------------------------------------------------------------------------------------------------------------------------------------------------------------------------------------------------------------------------------------------------------------------------------------------------------------------------------------------------------------------------------------------------------------------------------------------------------------------------------------------------------------------------------------------------------------------------------------------------------------------------------------------------------------------------------------------------------------------------------------------------------------------------------------------------------------------------------------------------------------------------------------------------------------------------------------------------------------------------------------------------------------------------------------------------------------------------------------------------------------------------------------------------------------------------------------------------------------------------------------------------------------------------------------------------------------------------------------------------------------------------------------------------------------------------------------------------------------------------------------------------------------------------------------------------------------------------------------------------------------------------------------------------------------------------------------------------------------------------------------------------------------------------------------------------------------------------------------------------------------------------------------------------------------------------------------------------------------------------------------------------------------------------------------------------------------------------------------------------|--------|-------|------|---|-----|
| QL01572 | Ethyl 3,3,4,4,5,5,6,6,7,7,8,8,8-tridecafluoro-2-oxooctanoate                                                                                                    | 117516-21-9  | CCOC(=O)C(=O)C(F)(F)C(F)(F)C(F)(F)C(F)(F)C(F)(F)F                                                                                                                                                                                                                                                                                                                                                                                                                                                                                                                                                                                                                                                                                                                                                                                                                                                                                                                                                                                                                                                                                                                                                                                                                                                                                                                                                                                                                                                                                                                                                                                                                                                                                                                                                                                                                                                                                                                                                                                                                                                                                                                                                                                                                                                                                                                                                                                                                                                                                                                                                                                                                                                                                                                                                                                                                                                                                                                                                                                                                                                                                                                                                                                                                                                                                                                                                                                                                                                                                                                                                                                                                                                                                                                                                                                                                                                                                                                                                                                                                                                                                                                                                                                                                                                                                                                                                                                                                                                                                                                                                                                                                                                                                                                                                                                                                                                                                                                                                                                                                                                                                                                                                                                                       | -8.43  | 41.94 | 2.52 | P | IN  |
| QL01573 | Ethyl 2-acetyl-4,4,5,5,6,6,6-heptafluoro-3-oxohexanoate                                                                                                         | 115479-06-6  | CCOC(=O)C(C)(C)=O)C(=O)C(F)(F)C(F)(F)C(F)F                                                                                                                                                                                                                                                                                                                                                                                                                                                                                                                                                                                                                                                                                                                                                                                                                                                                                                                                                                                                                                                                                                                                                                                                                                                                                                                                                                                                                                                                                                                                                                                                                                                                                                                                                                                                                                                                                                                                                                                                                                                                                                                                                                                                                                                                                                                                                                                                                                                                                                                                                                                                                                                                                                                                                                                                                                                                                                                                                                                                                                                                                                                                                                                                                                                                                                                                                                                                                                                                                                                                                                                                                                                                                                                                                                                                                                                                                                                                                                                                                                                                                                                                                                                                                                                                                                                                                                                                                                                                                                                                                                                                                                                                                                                                                                                                                                                                                                                                                                                                                                                                                                                                                                                                              | -6.45  | 23.33 | 2.22 | P | OUT |
| QL01574 | Ethyl 2-acetyl-3,3,4,4,5,5,5-heptafluoropentanoate                                                                                                              | 189237-57-8  | CCOC(=O)C(C)(C)=O)C(F)(F)C(F)(F)C(F)F                                                                                                                                                                                                                                                                                                                                                                                                                                                                                                                                                                                                                                                                                                                                                                                                                                                                                                                                                                                                                                                                                                                                                                                                                                                                                                                                                                                                                                                                                                                                                                                                                                                                                                                                                                                                                                                                                                                                                                                                                                                                                                                                                                                                                                                                                                                                                                                                                                                                                                                                                                                                                                                                                                                                                                                                                                                                                                                                                                                                                                                                                                                                                                                                                                                                                                                                                                                                                                                                                                                                                                                                                                                                                                                                                                                                                                                                                                                                                                                                                                                                                                                                                                                                                                                                                                                                                                                                                                                                                                                                                                                                                                                                                                                                                                                                                                                                                                                                                                                                                                                                                                                                                                                                                   | -6.33  | 25.00 | 2.12 | P | OUT |
| QL01575 | N-(Perfluoro-1-oxobutyl)aspartic acid 1-ethyl ester                                                                                                             | 88435-83-0   | CCOC(=O)C(CC(O)=O)NC(=O)C(F)(F)C(F)C(F)F                                                                                                                                                                                                                                                                                                                                                                                                                                                                                                                                                                                                                                                                                                                                                                                                                                                                                                                                                                                                                                                                                                                                                                                                                                                                                                                                                                                                                                                                                                                                                                                                                                                                                                                                                                                                                                                                                                                                                                                                                                                                                                                                                                                                                                                                                                                                                                                                                                                                                                                                                                                                                                                                                                                                                                                                                                                                                                                                                                                                                                                                                                                                                                                                                                                                                                                                                                                                                                                                                                                                                                                                                                                                                                                                                                                                                                                                                                                                                                                                                                                                                                                                                                                                                                                                                                                                                                                                                                                                                                                                                                                                                                                                                                                                                                                                                                                                                                                                                                                                                                                                                                                                                                                                                | -6.73  | 21.21 | 2.39 | P | OUT |
| QL01576 | Ethyl 2-[(diphenylmethylidene)amino]-5,5,6,6,7,7,8,8,8-nonafluorooctanoate                                                                                      | 125162-61-0  | CCOC(=O)C(CCC(F)(F)C(F)C(F)C(F)C(F)F)N=C(c1ccccc1)c1ccccc1                                                                                                                                                                                                                                                                                                                                                                                                                                                                                                                                                                                                                                                                                                                                                                                                                                                                                                                                                                                                                                                                                                                                                                                                                                                                                                                                                                                                                                                                                                                                                                                                                                                                                                                                                                                                                                                                                                                                                                                                                                                                                                                                                                                                                                                                                                                                                                                                                                                                                                                                                                                                                                                                                                                                                                                                                                                                                                                                                                                                                                                                                                                                                                                                                                                                                                                                                                                                                                                                                                                                                                                                                                                                                                                                                                                                                                                                                                                                                                                                                                                                                                                                                                                                                                                                                                                                                                                                                                                                                                                                                                                                                                                                                                                                                                                                                                                                                                                                                                                                                                                                                                                                                                                              | -7.12  | 16.36 | 2.69 | P | OUT |
| QL01577 | Ethyl 2,3,3,3-tetrafluoro-2-(trifluoromethyl)propanoate                                                                                                         | 1526-49-4    | CCOC(=O)C(F)(C(F)(F)F)C(F)F                                                                                                                                                                                                                                                                                                                                                                                                                                                                                                                                                                                                                                                                                                                                                                                                                                                                                                                                                                                                                                                                                                                                                                                                                                                                                                                                                                                                                                                                                                                                                                                                                                                                                                                                                                                                                                                                                                                                                                                                                                                                                                                                                                                                                                                                                                                                                                                                                                                                                                                                                                                                                                                                                                                                                                                                                                                                                                                                                                                                                                                                                                                                                                                                                                                                                                                                                                                                                                                                                                                                                                                                                                                                                                                                                                                                                                                                                                                                                                                                                                                                                                                                                                                                                                                                                                                                                                                                                                                                                                                                                                                                                                                                                                                                                                                                                                                                                                                                                                                                                                                                                                                                                                                                                             | -6.09  | 35.00 | 1.75 | P | IN  |
| QL01578 | Diethyl perfluoroglutarate                                                                                                                                      | 424-40-8     | CCOC(=O)C(F)(F)C(F)(F)C(F)C(=O)OCC                                                                                                                                                                                                                                                                                                                                                                                                                                                                                                                                                                                                                                                                                                                                                                                                                                                                                                                                                                                                                                                                                                                                                                                                                                                                                                                                                                                                                                                                                                                                                                                                                                                                                                                                                                                                                                                                                                                                                                                                                                                                                                                                                                                                                                                                                                                                                                                                                                                                                                                                                                                                                                                                                                                                                                                                                                                                                                                                                                                                                                                                                                                                                                                                                                                                                                                                                                                                                                                                                                                                                                                                                                                                                                                                                                                                                                                                                                                                                                                                                                                                                                                                                                                                                                                                                                                                                                                                                                                                                                                                                                                                                                                                                                                                                                                                                                                                                                                                                                                                                                                                                                                                                                                                                      | -6.66  | 20.69 | 2.38 | P | OUT |
| QL01579 | Ethyl perfluorododecanoate                                                                                                                                      | 158607-41-1  | CCOC(=O)C(F)(F)C(F)(F)C(F)(F)C(F)(F)C(F)(F)C(F)(F)C(F)(F)C(F)(F)C(F)(F)F                                                                                                                                                                                                                                                                                                                                                                                                                                                                                                                                                                                                                                                                                                                                                                                                                                                                                                                                                                                                                                                                                                                                                                                                                                                                                                                                                                                                                                                                                                                                                                                                                                                                                                                                                                                                                                                                                                                                                                                                                                                                                                                                                                                                                                                                                                                                                                                                                                                                                                                                                                                                                                                                                                                                                                                                                                                                                                                                                                                                                                                                                                                                                                                                                                                                                                                                                                                                                                                                                                                                                                                                                                                                                                                                                                                                                                                                                                                                                                                                                                                                                                                                                                                                                                                                                                                                                                                                                                                                                                                                                                                                                                                                                                                                                                                                                                                                                                                                                                                                                                                                                                                                                                                | -10.14 | 52.27 | 2.94 | P | OUT |
| QL01580 | Ethyl perfluorononan-1-oate                                                                                                                                     | 30377-52-7   | CCOC(=O)C(F)(F)C(F)(F)C(F)(F)C(F)(F)C(F)(F)C(F)F                                                                                                                                                                                                                                                                                                                                                                                                                                                                                                                                                                                                                                                                                                                                                                                                                                                                                                                                                                                                                                                                                                                                                                                                                                                                                                                                                                                                                                                                                                                                                                                                                                                                                                                                                                                                                                                                                                                                                                                                                                                                                                                                                                                                                                                                                                                                                                                                                                                                                                                                                                                                                                                                                                                                                                                                                                                                                                                                                                                                                                                                                                                                                                                                                                                                                                                                                                                                                                                                                                                                                                                                                                                                                                                                                                                                                                                                                                                                                                                                                                                                                                                                                                                                                                                                                                                                                                                                                                                                                                                                                                                                                                                                                                                                                                                                                                                                                                                                                                                                                                                                                                                                                                                                        | -9.28  | 48.57 | 2.69 | P | IN  |
| QL01581 | Ethyl perfluorooctanoate                                                                                                                                        | 3108-24-5    | CCOC(=O)C(F)(F)C(F)(F)C(F)(F)C(F)(F)C(F)F                                                                                                                                                                                                                                                                                                                                                                                                                                                                                                                                                                                                                                                                                                                                                                                                                                                                                                                                                                                                                                                                                                                                                                                                                                                                                                                                                                                                                                                                                                                                                                                                                                                                                                                                                                                                                                                                                                                                                                                                                                                                                                                                                                                                                                                                                                                                                                                                                                                                                                                                                                                                                                                                                                                                                                                                                                                                                                                                                                                                                                                                                                                                                                                                                                                                                                                                                                                                                                                                                                                                                                                                                                                                                                                                                                                                                                                                                                                                                                                                                                                                                                                                                                                                                                                                                                                                                                                                                                                                                                                                                                                                                                                                                                                                                                                                                                                                                                                                                                                                                                                                                                                                                                                                               | -8.74  | 46.88 | 2.51 | P | IN  |
| QL01582 | Ethyl perfluoroheptanoate                                                                                                                                       | 41430-70-0   | CCOC(=O)C(F)(F)C(F)(F)C(F)(F)C(F)C(F)F                                                                                                                                                                                                                                                                                                                                                                                                                                                                                                                                                                                                                                                                                                                                                                                                                                                                                                                                                                                                                                                                                                                                                                                                                                                                                                                                                                                                                                                                                                                                                                                                                                                                                                                                                                                                                                                                                                                                                                                                                                                                                                                                                                                                                                                                                                                                                                                                                                                                                                                                                                                                                                                                                                                                                                                                                                                                                                                                                                                                                                                                                                                                                                                                                                                                                                                                                                                                                                                                                                                                                                                                                                                                                                                                                                                                                                                                                                                                                                                                                                                                                                                                                                                                                                                                                                                                                                                                                                                                                                                                                                                                                                                                                                                                                                                                                                                                                                                                                                                                                                                                                                                                                                                                                  | -8.47  | 44.83 | 2.45 | P | IN  |
| QL01583 | Ethyl nonafluoropentanoate                                                                                                                                      | 424-36-2     | CCOC(=O)C(F)(F)C(F)(F)C(F)C(F)F                                                                                                                                                                                                                                                                                                                                                                                                                                                                                                                                                                                                                                                                                                                                                                                                                                                                                                                                                                                                                                                                                                                                                                                                                                                                                                                                                                                                                                                                                                                                                                                                                                                                                                                                                                                                                                                                                                                                                                                                                                                                                                                                                                                                                                                                                                                                                                                                                                                                                                                                                                                                                                                                                                                                                                                                                                                                                                                                                                                                                                                                                                                                                                                                                                                                                                                                                                                                                                                                                                                                                                                                                                                                                                                                                                                                                                                                                                                                                                                                                                                                                                                                                                                                                                                                                                                                                                                                                                                                                                                                                                                                                                                                                                                                                                                                                                                                                                                                                                                                                                                                                                                                                                                                                         | -7.45  | 39.13 | 2.19 | P | IN  |
| QL01584 | Ethyl heptafluorobutyrate                                                                                                                                       | 356-27-4     | CCOC(=O)C(F)(F)C(F)C(F)F                                                                                                                                                                                                                                                                                                                                                                                                                                                                                                                                                                                                                                                                                                                                                                                                                                                                                                                                                                                                                                                                                                                                                                                                                                                                                                                                                                                                                                                                                                                                                                                                                                                                                                                                                                                                                                                                                                                                                                                                                                                                                                                                                                                                                                                                                                                                                                                                                                                                                                                                                                                                                                                                                                                                                                                                                                                                                                                                                                                                                                                                                                                                                                                                                                                                                                                                                                                                                                                                                                                                                                                                                                                                                                                                                                                                                                                                                                                                                                                                                                                                                                                                                                                                                                                                                                                                                                                                                                                                                                                                                                                                                                                                                                                                                                                                                                                                                                                                                                                                                                                                                                                                                                                                                                | -6.54  | 35.00 | 1.93 | P | IN  |
| QL01585 | Ethyl perfluoropropionate                                                                                                                                       | 426-65-3     | CCOC(=O)C(F)(F)C(F)F                                                                                                                                                                                                                                                                                                                                                                                                                                                                                                                                                                                                                                                                                                                                                                                                                                                                                                                                                                                                                                                                                                                                                                                                                                                                                                                                                                                                                                                                                                                                                                                                                                                                                                                                                                                                                                                                                                                                                                                                                                                                                                                                                                                                                                                                                                                                                                                                                                                                                                                                                                                                                                                                                                                                                                                                                                                                                                                                                                                                                                                                                                                                                                                                                                                                                                                                                                                                                                                                                                                                                                                                                                                                                                                                                                                                                                                                                                                                                                                                                                                                                                                                                                                                                                                                                                                                                                                                                                                                                                                                                                                                                                                                                                                                                                                                                                                                                                                                                                                                                                                                                                                                                                                                                                    | -5.98  | 29.41 | 1.86 | P | IN  |
| QL01586 | Ethyl 2,3,3,3-tetrafluoro-2-(heptafluoropropoxy)propanoate                                                                                                      | 79851-29-9   | CCOC(=O)C(F)(OC(F)(F)C(F)(F)C(F)F)C(F)F                                                                                                                                                                                                                                                                                                                                                                                                                                                                                                                                                                                                                                                                                                                                                                                                                                                                                                                                                                                                                                                                                                                                                                                                                                                                                                                                                                                                                                                                                                                                                                                                                                                                                                                                                                                                                                                                                                                                                                                                                                                                                                                                                                                                                                                                                                                                                                                                                                                                                                                                                                                                                                                                                                                                                                                                                                                                                                                                                                                                                                                                                                                                                                                                                                                                                                                                                                                                                                                                                                                                                                                                                                                                                                                                                                                                                                                                                                                                                                                                                                                                                                                                                                                                                                                                                                                                                                                                                                                                                                                                                                                                                                                                                                                                                                                                                                                                                                                                                                                                                                                                                                                                                                                                                 | -7.55  | 40.74 | 2.19 | P | IN  |
| QL01587 | Ethyl 2,3,3,3-tetrafluoro-2-[1,1,2,3,3-hexafluoro-2-(heptafluoropropoxy)propoxy]propanoate                                                                      | 76145-88-5   | CCOC(=O)C(F)(OC(F)(F)C(F)(OC(F)(F)C(F)(F)C(F)F)C(F)F)C(F)F                                                                                                                                                                                                                                                                                                                                                                                                                                                                                                                                                                                                                                                                                                                                                                                                                                                                                                                                                                                                                                                                                                                                                                                                                                                                                                                                                                                                                                                                                                                                                                                                                                                                                                                                                                                                                                                                                                                                                                                                                                                                                                                                                                                                                                                                                                                                                                                                                                                                                                                                                                                                                                                                                                                                                                                                                                                                                                                                                                                                                                                                                                                                                                                                                                                                                                                                                                                                                                                                                                                                                                                                                                                                                                                                                                                                                                                                                                                                                                                                                                                                                                                                                                                                                                                                                                                                                                                                                                                                                                                                                                                                                                                                                                                                                                                                                                                                                                                                                                                                                                                                                                                                                                                              | -8.99  | 45.95 | 2.64 | P | IN  |
| QL01588 | Ethyl 2,4,4,5,7,7,8,10,10,11,13,13,14,16,16,17,19,19,20,20,21,21,21-tricosafuoro-2,5,8,11,14,17-hexakis(trifluoromethyl)-3,6,9,12,15,18-hexaoxahenicosan-1-oate | 121368-60-3  | CCOC(=O)C(F)(OC(F)(F)C(F)(OC(F)(F)C(F)(OC(F)(F)C(F)(OC(F)(F)C(F)(OC(F)(F)C(F)(OC(F)(F)C(F)F                                                                                                                                                                                                                                                                                                                                                                                                                                                                                                                                                                                                                                                                                                                                                                                                                                                                                                                                                                                                                                                                                                                                                                                                                                                                                                                                                                                                                                                                                                                                                                                                                                                                                                                                                                                                                                                                                                                                                                                                                                                                                                                                                                                                                                                                                                                                                                                                                                                                                                                                                                                                                                                                                                                                                                                                                                                                                                                                                                                                                                                                                                                                                                                                                                                                                                                                                                                                                                                                                                                                                                                                                                                                                                                                                                                                                                                                                                                                                                                                                                                                                                                                                                                                                                                                                                                                                                                                                                                                                                                                                                                                                                                                                                                                                                                                                                                                                                                                                                                                                                                                                                                                                             | -11.72 | 53.25 | 3.56 | P | OUT |
| QL01589 | Ethyl 4,4,5,5,6,6,7,8,8,9,9-tridecafluoro-2-iodononanoate                                                                                                       | 165281-74-3  | CCOC(=O)C(I)C(F)(F)C(F)(F)C(F)(F)C(F)(F)C(F)F                                                                                                                                                                                                                                                                                                                                                                                                                                                                                                                                                                                                                                                                                                                                                                                                                                                                                                                                                                                                                                                                                                                                                                                                                                                                                                                                                                                                                                                                                                                                                                                                                                                                                                                                                                                                                                                                                                                                                                                                                                                                                                                                                                                                                                                                                                                                                                                                                                                                                                                                                                                                                                                                                                                                                                                                                                                                                                                                                                                                                                                                                                                                                                                                                                                                                                                                                                                                                                                                                                                                                                                                                                                                                                                                                                                                                                                                                                                                                                                                                                                                                                                                                                                                                                                                                                                                                                                                                                                                                                                                                                                                                                                                                                                                                                                                                                                                                                                                                                                                                                                                                                                                                                                                           | -8.77  | 40.00 | 2.71 | P | IN  |
| QL01590 | Ethyl 4,4,5,5,6,6,6-heptafluorononoleucinate                                                                                                                    | 63664-52-8   | CCOC(=O)C(N)CC(F)(F)C(F)F                                                                                                                                                                                                                                                                                                                                                                                                                                                                                                                                                                                                                                                                                                                                                                                                                                                                                                                                                                                                                                                                                                                                                                                                                                                                                                                                                                                                                                                                                                                                                                                                                                                                                                                                                                                                                                                                                                                                                                                                                                                                                                                                                                                                                                                                                                                                                                                                                                                                                                                                                                                                                                                                                                                                                                                                                                                                                                                                                                                                                                                                                                                                                                                                                                                                                                                                                                                                                                                                                                                                                                                                                                                                                                                                                                                                                                                                                                                                                                                                                                                                                                                                                                                                                                                                                                                                                                                                                                                                                                                                                                                                                                                                                                                                                                                                                                                                                                                                                                                                                                                                                                                                                                                                                               | -6.67  | 25.00 | 2.26 | P | OUT |
| QL01591 | Ethyl 3,3,4,4,5,5,6,6,7,7,8,8,9,9,10,10,10-heptadecafluoro-2,2-dihydroxydecanoate                                                                               | 1401315-53-4 | CCOC(=O)C(O)(O)C(F)(F)C(F)C(F)(F)C(F)(F)C(F)(F)C(F)(F)C(F)F                                                                                                                                                                                                                                                                                                                                                                                                                                                                                                                                                                                                                                                                                                                                                                                                                                                                                                                                                                                                                                                                                                                                                                                                                                                                                                                                                                                                                                                                                                                                                                                                                                                                                                                                                                                                                                                                                                                                                                                                                                                                                                                                                                                                                                                                                                                                                                                                                                                                                                                                                                                                                                                                                                                                                                                                                                                                                                                                                                                                                                                                                                                                                                                                                                                                                                                                                                                                                                                                                                                                                                                                                                                                                                                                                                                                                                                                                                                                                                                                                                                                                                                                                                                                                                                                                                                                                                                                                                                                                                                                                                                                                                                                                                                                                                                                                                                                                                                                                                                                                                                                                                                                                                                             | -9.00  | 42.50 | 2.74 | P | IN  |
| QL01592 | Ethyl 3-amino-4,4,5,5,6,6,6-heptafluorohex-2-enoate                                                                                                             | 87613-26-1   | CCOC(=O)C=C(N)C(F)(F)C(F)(F)C(F)F                                                                                                                                                                                                                                                                                                                                                                                                                                                                                                                                                                                                                                                                                                                                                                                                                                                                                                                                                                                                                                                                                                                                                                                                                                                                                                                                                                                                                                                                                                                                                                                                                                                                                                                                                                                                                                                                                                                                                                                                                                                                                                                                                                                                                                                                                                                                                                                                                                                                                                                                                                                                                                                                                                                                                                                                                                                                                                                                                                                                                                                                                                                                                                                                                                                                                                                                                                                                                                                                                                                                                                                                                                                                                                                                                                                                                                                                                                                                                                                                                                                                                                                                                                                                                                                                                                                                                                                                                                                                                                                                                                                                                                                                                                                                                                                                                                                                                                                                                                                                                                                                                                                                                                                                                       | -6.80  | 26.92 | 2.26 | P | OUT |
| QL01593 | Ethyl (ZE)-4,4,5,5,6,6,6-heptafluorohex-2-enoate                                                                                                                | 37759-79-8   | CCOC(=O)C=C(C)C(F)(F)C(F)(F)F                                                                                                                                                                                                                                                                                                                                                                                                                                                                                                                                                                                                                                                                                                                                                                                                                                                                                                                                                                                                                                                                                                                                                                                                                                                                                                                                                                                                                                                                                                                                                                                                                                                                                                                                                                                                                                                                                                                                                                                                                                                                                                                                                                                                                                                                                                                                                                                                                                                                                                                                                                                                                                                                                                                                                                                                                                                                                                                                                                                                                                                                                                                                                                                                                                                                                                                                                                                                                                                                                                                                                                                                                                                                                                                                                                                                                                                                                                                                                                                                                                                                                                                                                                                                                                                                                                                                                                                                                                                                                                                                                                                                                                                                                                                                                                                                                                                                                                                                                                                                                                                                                                                                                                                                                           | -6.87  | 29.17 | 2.23 | P | IN  |
| QL01594 | Ethyl (ZE)-3-{1,1,2,2,3,3,4,4,4-nonafiurbutane-1-sulfinyl}prop-2-enoate                                                                                         | 1606997-39-0 | CCOC(=O)C=C(S)C(F)(F)C(F)(F)C(F)F                                                                                                                                                                                                                                                                                                                                                                                                                                                                                                                                                                                                                                                                                                                                                                                                                                                                                                                                                                                                                                                                                                                                                                                                                                                                                                                                                                                                                                                                                                                                                                                                                                                                                                                                                                                                                                                                                                                                                                                                                                                                                                                                                                                                                                                                                                                                                                                                                                                                                                                                                                                                                                                                                                                                                                                                                                                                                                                                                                                                                                                                                                                                                                                                                                                                                                                                                                                                                                                                                                                                                                                                                                                                                                                                                                                                                                                                                                                                                                                                                                                                                                                                                                                                                                                                                                                                                                                                                                                                                                                                                                                                                                                                                                                                                                                                                                                                                                                                                                                                                                                                                                                                                                                                                       | -7.74  | 31.03 | 2.53 | P | IN  |
| QL01595 | Ethyl 6-(nonafluorobutyl)-4-phenyl-2-sulfanylidene-1,2,3,4-tetrahydropyrimidine-5-carboxylate                                                                   | 281189-83-1  | CCOC(=O)C1=C(NC(=S)NC1c1ccccc1)C(F)(F)C(F)(F)C(F)F                                                                                                                                                                                                                                                                                                                                                                                                                                                                                                                                                                                                                                                                                                                                                                                                                                                                                                                                                                                                                                                                                                                                                                                                                                                                                                                                                                                                                                                                                                                                                                                                                                                                                                                                                                                                                                                                                                                                                                                                                                                                                                                                                                                                                                                                                                                                                                                                                                                                                                                                                                                                                                                                                                                                                                                                                                                                                                                                                                                                                                                                                                                                                                                                                                                                                                                                                                                                                                                                                                                                                                                                                                                                                                                                                                                                                                                                                                                                                                                                                                                                                                                                                                                                                                                                                                                                                                                                                                                                                                                                                                                                                                                                                                                                                                                                                                                                                                                                                                                                                                                                                                                                                                                                      | -6.90  | 20.45 | 2.48 | P | OUT |
| QL01596 | Diethyl 2,6-dihydroxy-2,6-bis(nonafluorobutyl)-4-phenyloxane-3,5-dicarboxylate                                                                                  | 359875-73-3  | CCOC(=O)C(C)C(C(=O)O)C1(C(F)(F)C(F)(F)C(F)(F)C(F)(F)C(F)(F)C(F)F                                                                                                                                                                                                                                                                                                                                                                                                                                                                                                                                                                                                                                                                                                                                                                                                                                                                                                                                                                                                                                                                                                                                                                                                                                                                                                                                                                                                                                                                                                                                                                                                                                                                                                                                                                                                                                                                                                                                                                                                                                                                                                                                                                                                                                                                                                                                                                                                                                                                                                                                                                                                                                                                                                                                                                                                                                                                                                                                                                                                                                                                                                                                                                                                                                                                                                                                                                                                                                                                                                                                                                                                                                                                                                                                                                                                                                                                                                                                                                                                                                                                                                                                                                                                                                                                                                                                                                                                                                                                                                                                                                                                                                                                                                                                                                                                                                                                                                                                                                                                                                                                                                                                                                                        | -7.33  | 25.71 | 2.52 | P | OUT |
| QL01597 | Ethyl 2-(pentadecafluoroheptyl)imidazo[1,2-a]pyridine-3-carboxylate                                                                                             | 135339-05-8  | CCOC(=O)c1c(nc2cccc12)C(F)(F)C(F)(F)C(F)(F)C(F)(F)C(F)F                                                                                                                                                                                                                                                                                                                                                                                                                                                                                                                                                                                                                                                                                                                                                                                                                                                                                                                                                                                                                                                                                                                                                                                                                                                                                                                                                                                                                                                                                                                                                                                                                                                                                                                                                                                                                                                                                                                                                                                                                                                                                                                                                                                                                                                                                                                                                                                                                                                                                                                                                                                                                                                                                                                                                                                                                                                                                                                                                                                                                                                                                                                                                                                                                                                                                                                                                                                                                                                                                                                                                                                                                                                                                                                                                                                                                                                                                                                                                                                                                                                                                                                                                                                                                                                                                                                                                                                                                                                                                                                                                                                                                                                                                                                                                                                                                                                                                                                                                                                                                                                                                                                                                                                                 | -8.37  | 33.33 | 2.73 | P | IN  |
| QL01598 | Ethyl 3-methyl-5-(nonafluorobutyl)-1H-pyrazole-4-carboxylate                                                                                                    | 119403-58-6  | CCOC(=O)c1c(Nnc1C)C(F)(F)C(F)(F)C(F)F                                                                                                                                                                                                                                                                                                                                                                                                                                                                                                                                                                                                                                                                                                                                                                                                                                                                                                                                                                                                                                                                                                                                                                                                                                                                                                                                                                                                                                                                                                                                                                                                                                                                                                                                                                                                                                                                                                                                                                                                                                                                                                                                                                                                                                                                                                                                                                                                                                                                                                                                                                                                                                                                                                                                                                                                                                                                                                                                                                                                                                                                                                                                                                                                                                                                                                                                                                                                                                                                                                                                                                                                                                                                                                                                                                                                                                                                                                                                                                                                                                                                                                                                                                                                                                                                                                                                                                                                                                                                                                                                                                                                                                                                                                                                                                                                                                                                                                                                                                                                                                                                                                                                                                                                                   | -7.22  | 27.27 | 2.43 | P | OUT |
| QL01599 | Ethyl 6-(heptafluoropropyl)pyridine-3-carboxylate                                                                                                               | 1574401-92-5 | CCOC(=O)c1ccc(nc1)C(F)(F)C(F)F                                                                                                                                                                                                                                                                                                                                                                                                                                                                                                                                                                                                                                                                                                                                                                                                                                                                                                                                                                                                                                                                                                                                                                                                                                                                                                                                                                                                                                                                                                                                                                                                                                                                                                                                                                                                                                                                                                                                                                                                                                                                                                                                                                                                                                                                                                                                                                                                                                                                                                                                                                                                                                                                                                                                                                                                                                                                                                                                                                                                                                                                                                                                                                                                                                                                                                                                                                                                                                                                                                                                                                                                                                                                                                                                                                                                                                                                                                                                                                                                                                                                                                                                                                                                                                                                                                                                                                                                                                                                                                                                                                                                                                                                                                                                                                                                                                                                                                                                                                                                                                                                                                                                                                                                                          | -7.20  | 24.14 | 2.51 | P | OUT |
| QL01600 | Ethyl 4-{[nonafluorobutyl)sulfonyl]benzoate                                                                                                                     | 1262679-06-0 | CCOC(=O)Cc1ccc(SC(F)(F)C(F)(F)C(F)(F)F)cc1                                                                                                                                                                                                                                                                                                                                                                                                                                                                                                                                                                                                                                                                                                                                                                                                                                                                                                                                                                                                                                                                                                                                                                                                                                                                                                                                                                                                                                                                                                                                                                                                                                                                                                                                                                                                                                                                                                                                                                                                                                                                                                                                                                                                                                                                                                                                                                                                                                                                                                                                                                                                                                                                                                                                                                                                                                                                                                                                                                                                                                                                                                                                                                                                                                                                                                                                                                                                                                                                                                                                                                                                                                                                                                                                                                                                                                                                                                                                                                                                                                                                                                                                                                                                                                                                                                                                                                                                                                                                                                                                                                                                                                                                                                                                                                                                                                                                                                                                                                                                                                                                                                                                                                                                              | -7.98  | 26.47 | 2.76 | P | OUT |
| QL01601 | Ethyl 2-(heptafluoropropyl)benzoate                                                                                                                             | 1310492-25-1 | CCOC(=O)c1ccccc1C(F)(F)C(F)F                                                                                                                                                                                                                                                                                                                                                                                                                                                                                                                                                                                                                                                                                                                                                                                                                                                                                                                                                                                                                                                                                                                                                                                                                                                                                                                                                                                                                                                                                                                                                                                                                                                                                                                                                                                                                                                                                                                                                                                                                                                                                                                                                                                                                                                                                                                                                                                                                                                                                                                                                                                                                                                                                                                                                                                                                                                                                                                                                                                                                                                                                                                                                                                                                                                                                                                                                                                                                                                                                                                                                                                                                                                                                                                                                                                                                                                                                                                                                                                                                                                                                                                                                                                                                                                                                                                                                                                                                                                                                                                                                                                                                                                                                                                                                                                                                                                                                                                                                                                                                                                                                                                                                                                                                            | -6.45  | 23.33 | 2.22 | P | OUT |
| QL01602 | Ethyl 5-(2,2,3,3,4,4,4-heptafluorobutanamido)-1-phenyl-1H-pyrazole-4-carboxylate                                                                                | 545359-89-5  | CCOC(=O)C1cnn(c1NC(=O)C(F)(F)C(F)(F)F)-c1ccccc1                                                                                                                                                                                                                                                                                                                                                                                                                                                                                                                                                                                                                                                                                                                                                                                                                                                                                                                                                                                                                                                                                                                                                                                                                                                                                                                                                                                                                                                                                                                                                                                                                                                                                                                                                                                                                                                                                                                                                                                                                                                                                                                                                                                                                                                                                                                                                                                                                                                                                                                                                                                                                                                                                                                                                                                                                                                                                                                                                                                                                                                                                                                                                                                                                                                                                                                                                                                                                                                                                                                                                                                                                                                                                                                                                                                                                                                                                                                                                                                                                                                                                                                                                                                                                                                                                                                                                                                                                                                                                                                                                                                                                                                                                                                                                                                                                                                                                                                                                                                                                                                                                                                                                                                                         | -6.66  | 17.07 | 2.48 | P | OUT |
| QL01603 | Ethyl 4,4,5,5,6,6,7,7,7-nonafluoro-3-oxoheptanoate                                                                                                              | 82941-37-5   | CCOC(=O)CC(=O)C(F)(F)C(F)(F)C(F)F                                                                                                                                                                                                                                                                                                                                                                                                                                                                                                                                                                                                                                                                                                                                                                                                                                                                                                                                                                                                                                                                                                                                                                                                                                                                                                                                                                                                                                                                                                                                                                                                                                                                                                                                                                                                                                                                                                                                                                                                                                                                                                                                                                                                                                                                                                                                                                                                                                                                                                                                                                                                                                                                                                                                                                                                                                                                                                                                                                                                                                                                                                                                                                                                                                                                                                                                                                                                                                                                                                                                                                                                                                                                                                                                                                                                                                                                                                                                                                                                                                                                                                                                                                                                                                                                                                                                                                                                                                                                                                                                                                                                                                                                                                                                                                                                                                                                                                                                                                                                                                                                                                                                                                                                                       | -7.66  | 32.14 | 2.47 | P | IN  |
| QL01604 | Ethyl heptafluorobutyrylacetate                                                                                                                                 | 336-62-9     | CCOC(=O)CC(=O)C(F)(F)C(F)C(F)F                                                                                                                                                                                                                                                                                                                                                                                                                                                                                                                                                                                                                                                                                                                                                                                                                                                                                                                                                                                                                                                                                                                                                                                                                                                                                                                                                                                                                                                                                                                                                                                                                                                                                                                                                                                                                                                                                                                                                                                                                                                                                                                                                                                                                                                                                                                                                                                                                                                                                                                                                                                                                                                                                                                                                                                                                                                                                                                                                                                                                                                                                                                                                                                                                                                                                                                                                                                                                                                                                                                                                                                                                                                                                                                                                                                                                                                                                                                                                                                                                                                                                                                                                                                                                                                                                                                                                                                                                                                                                                                                                                                                                                                                                                                                                                                                                                                                                                                                                                                                                                                                                                                                                                                                                          | -6.87  | 28.00 | 2.26 | P | OUT |
| QL01605 | Ethyl pentafluoropropionyl acetate                                                                                                                              | 663-35-4     | CCOC(=O)CC(=O)C(F)(F)C(F)F                                                                                                                                                                                                                                                                                                                                                                                                                                                                                                                                                                                                                                                                                                                                                                                                                                                                                                                                                                                                                                                                                                                                                                                                                                                                                                                                                                                                                                                                                                                                                                                                                                                                                                                                                                                                                                                                                                                                                                                                                                                                                                                                                                                                                                                                                                                                                                                                                                                                                                                                                                                                                                                                                                                                                                                                                                                                                                                                                                                                                                                                                                                                                                                                                                                                                                                                                                                                                                                                                                                                                                                                                                                                                                                                                                                                                                                                                                                                                                                                                                                                                                                                                                                                                                                                                                                                                                                                                                                                                                                                                                                                                                                                                                                                                                                                                                                                                                                                                                                                                                                                                                                                                                                                                              | -6.30  | 22.73 | 2.17 | P | OUT |
| QL01606 | Ethyl 7,7,8,8,9,9,10,10,10-nonafluoro-3-oxodecanoate                                                                                                            | 1444474-83-2 | CCOC(=O)CC(=O)CCCC(F)(F)C(F)(F)C(F)F                                                                                                                                                                                                                                                                                                                                                                                                                                                                                                                                                                                                                                                                                                                                                                                                                                                                                                                                                                                                                                                                                                                                                                                                                                                                                                                                                                                                                                                                                                                                                                                                                                                                                                                                                                                                                                                                                                                                                                                                                                                                                                                                                                                                                                                                                                                                                                                                                                                                                                                                                                                                                                                                                                                                                                                                                                                                                                                                                                                                                                                                                                                                                                                                                                                                                                                                                                                                                                                                                                                                                                                                                                                                                                                                                                                                                                                                                                                                                                                                                                                                                                                                                                                                                                                                                                                                                                                                                                                                                                                                                                                                                                                                                                                                                                                                                                                                                                                                                                                                                                                                                                                                                                                                                    | -7.78  | 24.32 | 2.74 | P | OUT |
| QL01607 | Ethyl 4,4,5,5,6,6,6-heptafluoro-3,3-bis(trifluoromethyl)hexanoate                                                                                               | 161261-13-8  | CCOC(=O)CC(C(F)(F)C(F)(F)C(F)(F)C(F)(F)C(F)F                                                                                                                                                                                                                                                                                                                                                                                                                                                                                                                                                                                                                                                                                                                                                                                                                                                                                                                                                                                                                                                                                                                                                                                                                                                                                                                                                                                                                                                                                                                                                                                                                                                                                                                                                                                                                                                                                                                                                                                                                                                                                                                                                                                                                                                                                                                                                                                                                                                                                                                                                                                                                                                                                                                                                                                                                                                                                                                                                                                                                                                                                                                                                                                                                                                                                                                                                                                                                                                                                                                                                                                                                                                                                                                                                                                                                                                                                                                                                                                                                                                                                                                                                                                                                                                                                                                                                                                                                                                                                                                                                                                                                                                                                                                                                                                                                                                                                                                                                                                                                                                                                                                                                                                                            | -7.28  | 40.63 | 2.08 | P | IN  |
| QL01608 | Ethyl 4,4,5,5,6,6,6-heptafluoro-3-(nitromethyl)hexanoate                                                                                                        | 376-88-5     | CCOC(=O)CC(C[N+](=[O-])=O)C(F)(F)C(F)C(F)F                                                                                                                                                                                                                                                                                                                                                                                                                                                                                                                                                                                                                                                                                                                                                                                                                                                                                                                                                                                                                                                                                                                                                                                                                                                                                                                                                                                                                                                                                                                                                                                                                                                                                                                                                                                                                                                                                                                                                                                                                                                                                                                                                                                                                                                                                                                                                                                                                                                                                                                                                                                                                                                                                                                                                                                                                                                                                                                                                                                                                                                                                                                                                                                                                                                                                                                                                                                                                                                                                                                                                                                                                                                                                                                                                                                                                                                                                                                                                                                                                                                                                                                                                                                                                                                                                                                                                                                                                                                                                                                                                                                                                                                                                                                                                                                                                                                                                                                                                                                                                                                                                                                                                                                                              | -6.39  | 22.58 | 2.21 | P | OUT |
| QL01609 | Octanoic acid, 3,3,4,4,5,5,6,6,7,7,8,8,8-tridecafluoro-, ethyl ester                                                                                            | 153296-01-6  | CCOC(=O)CC(F)(F)C(F)(F)C(F)(F)C(F)(F)C(F)(F)F                                                                                                                                                                                                                                                                                                                                                                                                                                                                                                                                                                                                                                                                                                                                                                                                                                                                                                                                                                                                                                                                                                                                                                                                                                                                                                                                                                                                                                                                                                                                                                                                                                                                                                                                                                                                                                                                                                                                                                                                                                                                                                                                                                                                                                                                                                                                                                                                                                                                                                                                                                                                                                                                                                                                                                                                                                                                                                                                                                                                                                                                                                                                                                                                                                                                                                                                                                                                                                                                                                                                                                                                                                                                                                                                                                                                                                                                                                                                                                                                                                                                                                                                                                                                                                                                                                                                                                                                                                                                                                                                                                                                                                                                                                                                                                                                                                                                                                                                                                                                                                                                                                                                                                                                           | -8.35  | 40.63 | 2.52 | P | IN  |
| QL01610 | Ethyl 3,3,4,4,5,5,6,6,6-nonafluorohexanoate                                                                                                                     | 172287-15-9  | CCOC(=O)CC(F)(F)C(F)(F)C(F)(F)C(F)F                                                                                                                                                                                                                                                                                                                                                                                                                                                                                                                                                                                                                                                                                                                                                                                                                                                                                                                                                                                                                                                                                                                                                                                                                                                                                                                                                                                                                                                                                                                                                                                                                                                                                                                                                                                                                                                                                                                                                                                                                                                                                                                                                                                                                                                                                                                                                                                                                                                                                                                                                                                                                                                                                                                                                                                                                                                                                                                                                                                                                                                                                                                                                                                                                                                                                                                                                                                                                                                                                                                                                                                                                                                                                                                                                                                                                                                                                                                                                                                                                                                                                                                                                                                                                                                                                                                                                                                                                                                                                                                                                                                                                                                                                                                                                                                                                                                                                                                                                                                                                                                                                                                                                                                                                     | -7.33  | 34.62 | 2.27 | P | IN  |
| QL01611 | Ethyl 3,3,4,4,5,5,5-heptafluoropentanoate                                                                                                                       | 773136-96-2  | CCOC(=O)CC(F)(F)C(F)(F)C(F)F                                                                                                                                                                                                                                                                                                                                                                                                                                                                                                                                                                                                                                                                                                                                                                                                                                                                                                                                                                                                                                                                                                                                                                                                                                                                                                                                                                                                                                                                                                                                                                                                                                                                                                                                                                                                                                                                                                                                                                                                                                                                                                                                                                                                                                                                                                                                                                                                                                                                                                                                                                                                                                                                                                                                                                                                                                                                                                                                                                                                                                                                                                                                                                                                                                                                                                                                                                                                                                                                                                                                                                                                                                                                                                                                                                                                                                                                                                                                                                                                                                                                                                                                                                                                                                                                                                                                                                                                                                                                                                                                                                                                                                                                                                                                                                                                                                                                                                                                                                                                                                                                                                                                                                                                                            | -6.76  | 30.43 | 2.15 | P | IN  |
| QL01612 | Ethyl 4,4,5,5,6,6,6-heptafluoro-3-hydroxyhexanoate                                                                                                              | 2707-76-8    | CCOC(=O)CC(O)C(F)(F)C(F)(F)F                                                                                                                                                                                                                                                                                                                                                                                                                                                                                                                                                                                                                                                                                                                                                                                                                                                                                                                                                                                                                                                                                                                                                                                                                                                                                                                                                                                                                                                                                                                                                                                                                                                                                                                                                                                                                                                                                                                                                                                                                                                                                                                                                                                                                                                                                                                                                                                                                                                                                                                                                                                                                                                                                                                                                                                                                                                                                                                                                                                                                                                                                                                                                                                                                                                                                                                                                                                                                                                                                                                                                                                                                                                                                                                                                                                                                                                                                                                                                                                                                                                                                                                                                                                                                                                                                                                                                                                                                                                                                                                                                                                                                                                                                                                                                                                                                                                                                                                                                                                                                                                                                                                                                                                                                            | -6.73  | 25.93 | 2.26 | P | OUT |
| QL01613 | Ethyl 4,4,5,5,6,6,6-heptafluoro-3-sulfanylhexanoate                                                                                                             | 377-64-0     | CCOC(=O)CC(S)C(F)(F)C(F)(F)F                                                                                                                                                                                                                                                                                                                                                                                                                                                                                                                                                                                                                                                                                                                                                                                                                                                                                                                                                                                                                                                                                                                                                                                                                                                                                                                                                                                                                                                                                                                                                                                                                                                                                                                                                                                                                                                                                                                                                                                                                                                                                                                                                                                                                                                                                                                                                                                                                                                                                                                                                                                                                                                                                                                                                                                                                                                                                                                                                                                                                                                                                                                                                                                                                                                                                                                                                                                                                                                                                                                                                                                                                                                                                                                                                                                                                                                                                                                                                                                                                                                                                                                                                                                                                                                                                                                                                                                                                                                                                                                                                                                                                                                                                                                                                                                                                                                                                                                                                                                                                                                                                                                                                                                                                            | -6.73  | 25.93 | 2.26 | P | OUT |
| QL01614 | Ethyl 3-{2-ethoxy-2-oxoethyl)-5-(2,2,3,3,4,4,5,5,6,6,7,7,8,8,9,9,9-heptadecafluorononyl)-2-oxooxolane-3-carboxylate                                             | 674786-75-5  | CCOC(=O)CC1(CC(CCF)(F)C(F)C(F)C(F)C(F)C(F)C(F)C(F)C(F)C(F)C(F)C(F)C(F)C(F)C(F)C(F)C(F)C(F)C(F)C(F)C(F)C(F)C(F)C(F)C(F)C(F)C(F)C(F)C(F)C(F)C(F)C(F)C(F)C(F)C(F)C(F)C(F)C(F)C(F)C(F)C(F)C(F)C(F)C(F)C(F)C(F)C(F)C(F)C(F)C(F)C(F)C(F)C(F)C(F)C(F)C(F)C(F)C(F)C(F)C(F)C(F)C(F)C(F)C(F)C(F)C(F)C(F)C(F)C(F)C(F)C(F)C(F)C(F)C(F)C(F)C(F)C(F)C(F)C(F)C(F)C(F)C(F)C(F)C(F)C(F)C(F)C(F)C(F)C(F)C(F)C(F)C(F)C(F)C(F)C(F)C(F)C(F)C(F)C(F)C(F)C(F)C(F)C(F)C(F)C(F)C(F)C(F)C(F)C(F)C(F)C(F)C(F)C(F)C(F)C(F)C(F)C(F)C(F)C(F)C(F)C(F)C(F)C(F)C(F)C(F)C(F)C(F)C(F)C(F)C(F)C(F)C(F)C(F)C(F)C(F)C(F)C(F)C(F)C(F)C(F)C(F)C(F)C(F)C(F)C(F)C(F)C(F)C(F)C(F)C(F)C(F)C(F)C(F)C(F)C(F)C(F)C(F)C(F)C(F)C(F)C(F)C(F)C(F)C(F)C(F)C(F)C(F)C(F)C(F)C(F)C(F)C(F)C(F)C(F)C(F)C(F)C(F)C(F)C(F)C(F)C(F)C(F)C(F)C(F)C(F)C(F)C(F)C(F)C(F)C(F)C(F)C(F)C(F)C(F)C(F)C(F)C(F)C(F)C(F)C(F)C(F)C(F)C(F)C(F)C(F)C(F)C(F)C(F)C(F)C(F)C(F)C(F)C(F)C(F)C(F)C(F)C(F)C(F)C(F)C(F)C(F)C(F)C(F)C(F)C(F)C(F)C(F)C(F)C(F)C(F)C(F)C(F)C(F)C(F)C(F)C(F)C(F)C(F)C(F)C(F)C(F)C(F)C(F)C(F)C(F)C(F)C(F)C(F)C(F)C(F)C(F)C(F)C(F)C(F)C(F)C(F)C(F)C(F)C(F)C(F)C(F)C(F)C(F)C(F)C(F)C(F)C(F)C(F)C(F)C(F)C(F)C(F)C(F)C(F)C(F)C(F)C(F)C(F)C(F)C(F)C(F)C(F)C(F)C(F)C(F)C(F)C(F)C(F)C(F)C(F)C(F)C(F)C(F)C(F)C(F)C(F)C(F)C(F)C(F)C(F)C(F)C(F)C(F)C(F)C(F)C(F)C(F)C(F)C(F)C(F)C(F)C(F)C(F)C(F)C(F)C(F)C(F)C(F)C(F)C(F)C(F)C(F)C(F)C(F)C(F)C(F)C(F)C(F)C(F)C(F)C(F)C(F)C(F)C(F)C(F)C(F)C(F)C(F)C(F)C(F)C(F)C(F)C(F)C(F)C(F)C(F)C(F)C(F)C(F)C(F)C(F)C(F)C(F)C(F)C(F)C(F)C(F)C(F)C(F)C(F)C(F)C(F)C(F)C(F)C(F)C(F)C(F)C(F)C(F)C(F)C(F)C(F)C(F)C(F)C(F)C(F)C(F)C(F)C(F)C(F)C(F)C(F)C(F)C(F)C(F)C(F)C(F)C(F)C(F)C(F)C(F)C(F)C(F)C(F)C(F)C(F)C(F)C(F)C(F)C(F)C(F)C(F)C(F)C(F)C(F)C(F)C(F)C(F)C(F)C(F)C(F)C(F)C(F)C(F)C(F)C(F)C(F)C(F)C(F)C(F)C(F)C(F)C(F)C(F)C(F)C(F)C(F)C(F)C(F)C(F)C(F)C(F)C(F)C(F)C(F)C(F)C(F)C(F)C(F)C(F)C(F)C(F)C(F)C(F)C(F)C(F)C(F)C(F)C(F)C(F)C(F)C(F)C(F)C(F)C(F)C(F)C(F)C(F)C(F)C(F)C(F)C(F)C(F)C(F)C(F)C(F)C(F)C(F)C(F)C(F)C(F)C(F)C(F)C(F)C(F)C(F)C(F)C(F)C(F)C(F)C(F)C(F)C(F)C(F)C(F)C(F)C(F)C(F)C(F)C(F)C(F)C(F)C(F)C(F)C(F)C(F)C(F)C(F)C(F)C(F)C(F)C(F)C(F)C(F)C(F)C(F)C(F)C(F)C(F)C(F)C(F)C(F)C(F)C(F)C(F)C(F)C(F)C(F)C(F)C(F)C(F)C(F)C(F)C(F)C(F)C(F)C(F)C(F)C(F)C(F)C(F)C(F)C(F)C(F)C(F)C(F)C(F)C(F)C(F)C(F)C(F)C(F)C(F)C(F)C(F)C(F)C(F)C(F)C(F)C(F)C(F)C(F)C(F)C(F)C(F)C(F)C(F)C(F)C(F)C(F)C(F)C(F)C(F)C(F)C(F)C(F)C(F)C(F)C(F)C(F)C(F)C(F)C(F)C(F)C(F)C(F)C(F)C(F)C(F)C(F)C(F)C(F)C(F)C(F)C(F)C(F)C(F)C(F)C(F)C(F)C(F)C(F)C(F)C(F)C(F)C(F)C(F)C(F)C(F)C(F)C(F)C(F)C(F)C(F)C(F)C(F)C(F)C(F)C(F)C(F)C(F)C(F)C(F)C(F)C(F)C(F)C(F)C(F)C(F)C(F)C(F)C(F)C(F)C(F)C(F)C(F)C(F)C(F)C(F)C(F)C(F)C(F)C(F)C(F)C(F)C(F)C(F)C(F)C(F)C(F)C(F)C(F)C(F)C(F)C(F)C(F)C(F)C(F)C(F)C(F)C(F)C(F)C(F)C(F)C(F)C(F)C(F)C(F)C(F)C(F)C(F)C(F)C(F)C(F)C(F)C(F)C(F)C(F)C(F)C(F)C(F)C(F)C(F)C(F)C(F)C(F)C(F)C(F)C(F)C(F)C(F)C(F)C(F)C(F)C(F)C(F)C(F)C(F)C(F)C(F)C(F)C(F)C(F)C(F)C(F)C(F)C(F)C(F)C(F)C(F)C(F)C(F)C(F)C(F)C(F)C(F)C(F)C(F)C(F)C(F)C(F)C(F)C(F)C(F)C(F)C(F)C(F)C(F)C(F)C(F)C(F)C(F)C(F)C(F)C(F)C(F)C(F)C(F)C(F)C(F)C(F)C(F)C(F)C(F)C(F)C(F)C(F)C(F)C(F)C(F)C(F)C(F)C(F)C(F)C(F)C(F)C(F)C(F)C(F)C(F)C(F)C(F)C(F)C(F)C(F)C(F)C(F)C(F)C(F)C(F)C(F)C(F)C(F)C(F)C(F)C(F)C(F)C(F)C(F)C(F)C(F)C(F)C(F)C(F)C(F)C(F)C(F)C(F)C(F)C(F)C(F)C(F)C(F)C(F)C(F)C(F)C(F)C(F)C(F)C(F)C(F)C(F)C(F)C(F)C(F)C(F)C(F)C(F)C(F)C(F)C(F)C(F)C(F)C(F)C(F)C(F)C(F)C(F)C(F)C(F)C(F)C(F)C(F)C(F)C(F)C(F)C(F)C(F)C(F)C(F)C(F)C(F)C(F)C(F)C(F)C(F)C(F)C(F)C(F)C(F)C(F)C(F)C(F)C(F)C(F)C(F)C(F)C(F)C(F)C(F)C(F)C(F)C(F)C(F)C(F)C(F)C(F)C(F)C(F)C(F)C(F)C(F)C(F)C(F)C(F)C(F)C(F)C(F)C(F)C(F)C(F)C(F)C(F)C(F)C(F)C(F)C(F)C(F)C(F)C(F)C(F)C(F)C(F)C(F)C(F)C(F)C(F)C(F)C(F)C(F)C(F)C(F)C(F)C(F)C(F)C(F)C(F)C(F)C(F)C(F)C(F)C(F)C(F)C(F)C(F)C(F)C(F)C(F)C(F)C(F)C(F)C(F)C(F)C(F)C(F)C(F)C(F)C(F)C(F)C(F)C(F)C(F)C(F)C(F)C(F)C(F)C(F)C(F)C(F)C(F)C(F)C(F)C(F)C(F)C(F)C(F)C(F)C(F)C(F)C(F)C(F)C(F)C(F)C(F)C(F)C(F)C(F)C(F)C(F)C(F)C(F)C(F)C(F)C(F)C(F)C(F)C(F)C(F)C(F)C(F)C(F)C(F)C(F)C(F)C(F)C(F)C(F)C(F)C(F)C(F)C(F)C(F)C(F)C(F)C(F)C(F)C(F)C(F)C(F)C(F)C(F)C(F)C(F)C(F)C(F)C(F)C(F)C(F)C(F)C(F)C(F)C(F)C(F)C(F)C(F)C(F)C(F)C(F)C(F)C(F)C(F)C(F)C(F)C(F)C(F)C(F)C(F)C(F)C(F)C(F)C(F)C(F)C(F)C(F)C(F)C(F)C(F)C(F)C(F)C(F)C(F)C(F)C(F)C(F)C(F)C(F)C(F)C(F)C(F)C(F)C(F)C(F)C(F)C(F)C(F)C(F)C(F)C(F)C(F)C(F)C(F)C(F)C(F)C(F)C(F)C(F)C(F)C(F)C(F)C(F)C(F)C(F)C(F)C(F)C(F)C(F)C(F)C(F)C(F)C(F)C(F)C(F)C(F)C(F)C(F)C(F)C(F)C(F)C(F)C(F)C(F)C(F)C(F)C(F)C(F)C(F)C(F)C(F)C(F)C(F)C(F)C(F)C(F)C(F)C(F)C(F)C(F)C(F)C(F)C(F)C(F)C(F)C(F)C(F)C(F)C(F)C(F)C(F)C(F)C(F)C(F)C(F)C(F)C(F)C(F)C(F)C(F)C(F)C(F)C(F)C(F)C(F)C(F)C(F)C(F)C(F)C(F)C(F)C(F)C(F)C(F)C(F)C(F)C(F)C(F)C(F)C(F)C(F)C(F)C(F)C(F)C(F)C(F)C(F)C(F)C(F)C(F)C(F)C(F)C(F)C(F)C(F)C(F)C(F)C(F)C(F)C(F)C(F)C(F)C(F)C(F)C(F)C(F)C(F)C(F)C(F)C(F)C(F)C(F)C(F)C(F)C(F)C(F)C(F)C(F)C(F)C(F)C(F)C(F)C(F)C(F)C(F)C(F)C(F)C(F)C(F)C(F)C(F)C(F)C(F)C(F)C(F)C(F)C(F)C(F)C(F)C(F)C(F)C(F)C(F)C(F)C(F)C(F)C(F)C(F)C(F)C(F)C(F)C(F)C(F)C(F)C(F)C(F)C(F)C(F)C(F)C(F)C(F)C(F)C(F)C(F)C(F)C(F)C(F)C(F)C(F)C(F)C(F)C(F)C(F)C(F)C(F)C(F)C(F)C(F)C(F)C(F)C(F)C(F)C(F)C(F)C(F)C(F)C(F)C(F)C(F)C(F)C(F)C(F)C(F)C(F)C(F)C(F)C(F)C(F)C(F)C(F)C(F)C(F)C(F)C(F)C(F)C(F)C(F)C(F)C(F)C(F)C(F)C(F)C(F)C(F)C(F)C(F)C(F)C(F)C(F)C(F)C |        |       |      |   |     |











|         |                                                                                                                                                                                                                                                                                                                      |              |                                                                                           |       |       |      |   |     |
|---------|----------------------------------------------------------------------------------------------------------------------------------------------------------------------------------------------------------------------------------------------------------------------------------------------------------------------|--------------|-------------------------------------------------------------------------------------------|-------|-------|------|---|-----|
| QL01687 | N,N-dimethyl-2H-perfluoroethanamine                                                                                                                                                                                                                                                                                  | 1550-50-1    | CN(C)C(F)(F)C(F)F                                                                         | -4.56 | 25.00 | 1.39 | P | OUT |
| QL01688 | Benzenamine, 4-(heptadecafluorooctyl)-N,N-dimethyl-                                                                                                                                                                                                                                                                  | 80791-09-9   | CN(C)C1=CC=C(C=C1)C(F)(F)C(F)(F)C(F)(F)C(F)(F)C(F)(F)C(F)(F)F                             | -9.14 | 38.64 | 2.90 | P | IN  |
| QL01689 | N'-[4-{Dimethylamino}phenyl]methylidene)-2,2,3,3,4,4,5,5,6,6,7,7,7-tridecafluoroheptanehydrazide 4-{1,1,1,2,3,3,3-Heptafluoropropan-2-yl}-N,N-dimethylaniline                                                                                                                                                        | 328016-16-6  | CN(C)c1ccc(C=NNC(=O)C(F)(F)C(F)(F)C(F)(F)C(F)(F)C(F)(F)C(F)(F)F)cc1                       | -8.86 | 28.89 | 3.06 | P | OUT |
| QL01690 | N,N-Dimethyl-4-(tridecafluorohexyl)aniline                                                                                                                                                                                                                                                                           | 2396-19-2    | CN(C)c1ccc(cc1)C(F)(F)C(F)C(F)(F)F                                                        | -6.23 | 24.14 | 2.10 | P | OUT |
| QL01691 | 4-{Dimethylamino}phenyl nonafluorobutane-1-sulfonate                                                                                                                                                                                                                                                                 | 141822-33-5  | CN(C)c1ccc(cc1)C(F)(F)C(F)(F)C(F)(F)C(F)(F)C(F)(F)F                                       | -8.37 | 34.21 | 2.71 | P | IN  |
| QL01692 | 1-{Dimethylamino}-4,4,5,5,6,6,7,7,7-nonafluoroheptan-2-ol                                                                                                                                                                                                                                                            | 1463426-91-6 | CN(C)c1ccc(OS(=O)(=O)C(F)(F)C(F)(F)C(F)(F)C(F)(F)F)cc1                                    | -7.66 | 25.00 | 2.67 | P | OUT |
| QL01693 | 1-Propanaminium, 2-hydroxy-N,N,N-trimethyl-, 3-[(gamma-.omega.-perfluoro-C6-20-alkyl)thio] derivs., chlorides                                                                                                                                                                                                        | 1023972-12-4 | CN(C)CC(O)CC(F)(F)C(F)(F)C(F)(F)C(F)(F)F                                                  | -6.88 | 28.13 | 2.26 | P | OUT |
| QL01694 | N,N-Dimethyl-3-((perfluorohexyl)ethylsulfonyl)aminopropanamine N-oxide                                                                                                                                                                                                                                               | 70983-60-7   | CN(C)CC(O)SC(F)(F)C(F)(F)C(F)(F)C(F)(F)C(F)(F)F                                           | -8.04 | 36.11 | 2.52 | P | IN  |
| QL01695 | N-[4-{Dimethylamino}butyl]-2,2,3,3,4,4,5,5,6,6,7,7,8,8,8-pentadecafluorooctanamide                                                                                                                                                                                                                                   | 80475-32-7   | CN(C)CCC[NH+][O-][S](=O)(=O)CCCC(F)(F)C(F)(F)C(F)(F)C(F)(F)C(F)(F)F                       | -8.36 | 26.53 | 2.91 | P | OUT |
| QL01696 | 1-Propanesulfonic acid, 3-[[3-(dimethylamino)propyl]](tridecafluorohexyl)sulfonyl]amino]-2-hydroxy-, monosodium salt                                                                                                                                                                                                 | 118454-01-6  | CN(C)CCCCNC(=O)C(F)(F)C(F)(F)C(F)(F)C(F)(F)C(F)(F)C(F)(F)F                                | -8.83 | 31.91 | 2.96 | P | OUT |
| QL01697 | 1-((3-(Dimethylamino)propyl)amino)-3-(perfluorooctyl)propan-2-ol                                                                                                                                                                                                                                                     | 73772-32-4   | CN(C)CCCN(C)CC(S(=O)(=O)[O-])[O-]O[S](=O)(=O)C(C)C(C)C(C)C(F)(F)C(F)(F)C(F)(F)F.[Na+]     | -7.93 | 23.21 | 2.83 | P | OUT |
| QL01698 | Perfluorobutane sulfonamido amine                                                                                                                                                                                                                                                                                    | 94159-81-6   | CN(C)CCCNCC(O)CC(F)(F)C(F)(F)C(F)(F)C(F)(F)C(F)(F)C(F)(F)F                                | -9.19 | 30.91 | 3.14 | P | OUT |
| QL01699 | 62 Fluorotelomer sulfonamide amine                                                                                                                                                                                                                                                                                   | 68555-77-1   | CN(C)CCCN(S(=O)(=O)C(F)(F)C(F)(F)C(F)(F)C(F)(F)F                                          | -7.35 | 25.00 | 2.54 | P | OUT |
| QL01700 | 1,1,2,2,3,3,4,4,5,5,6,6,6-Tridecafluoro-N,N-dimethylhexane-1-sulfonamide                                                                                                                                                                                                                                             | 34455-22-6   | CN(C)CCCN(S(=O)(=O)CCCC(F)(F)C(F)(F)C(F)(F)C(F)(F)C(F)(F)F                                | -8.40 | 27.08 | 2.92 | P | OUT |
| QL01701 | N-{3-[(3,3,4,4,5,5,6,6,7,7,8,8,9,9,10,10,10-Heptadecafluorodecyl)sulfanyl]-2-hydroxypropyl}-N-methylglycine                                                                                                                                                                                                          | 1270179-82-2 | CN(C)S(=O)(=O)C(F)(F)C(F)(F)C(F)(F)C(F)(F)C(F)(F)C(F)(F)F                                 | -7.75 | 41.94 | 2.24 | P | IN  |
| QL01702 | Isooctanesulfonamide, heptadecafluoro-N-{2-hydroxyethyl}-N-methyl-N-(2-hydroxyethyl)-N-methylperfluoro-2-methylpropanesulfonamide                                                                                                                                                                                    | 93128-66-6   | CN(CC(O)CSCCC(F)(F)C(F)(F)C(F)(F)C(F)(F)C(F)(F)C(F)(F)C(F)(F)C(F)(F)CC(O)=O               | -9.45 | 31.48 | 3.23 | P | OUT |
| QL01703 | 1-Pentanesulfonamide, 1,1,2,2,3,3,4,4,5,5,5-undecafluoro-N-{2-hydroxyethyl}-N-methyl-1-Butanesulfonamide, 1,1,2,2,3,3,4,4,4-nonafluoro-N-(2-hydroxyethyl)-N-methyl-3,3,4,4,5,5,6,6,7,7,8,8,8-Tridecafluoro-N-(2-hydroxyethyl)-N-methyl-1-octanesulfonamide                                                           | 93894-65-6   | CN(CCO)[S](=O)(=O)C(F)(F)C(F)(F)C(F)(F)C(F)(F)C(F)(F)C(F)(F)C(F)(F)F                      | -8.77 | 41.46 | 2.67 | P | IN  |
| QL01704 | 2-Propenoic acid, 2-[methyl((nonafluorobutyl)sulfonyl)amino]ethyl ester                                                                                                                                                                                                                                              | 93762-11-9   | CN(CCO)S(=O)(=O)C(F)(F)C(F)(F)C(F)(F)C(F)(F)F                                             | -6.78 | 31.03 | 2.14 | P | IN  |
| QL01705 | 2-Methyl-2-(nonafluorobutyl)sulfonyl]amino]ethyl phosphate                                                                                                                                                                                                                                                           | 68555-74-8   | CN(CCO)S(=O)(=O)C(F)(F)C(F)(F)C(F)(F)C(F)(F)C(F)(F)F                                      | -7.77 | 34.38 | 2.45 | P | IN  |
| QL01706 | 2,2,3,3,4,4,4-Heptafluoro-N-hydroxy-N-methylbutanamide                                                                                                                                                                                                                                                               | 34454-97-2   | CN(CCO)S(=O)(=O)C(F)(F)C(F)(F)C(F)(F)C(F)(F)F                                             | -7.03 | 31.03 | 2.24 | P | IN  |
| QL01707 | N,N-Dimethyl perfluorooctane sulfonamide                                                                                                                                                                                                                                                                             | 156119-73-9  | CN(CCO)S(=O)(=O)CCC(F)(F)C(F)(F)C(F)(F)C(F)(F)C(F)(F)F                                    | -8.31 | 31.71 | 2.75 | P | IN  |
| QL01708 | 2-Propenoic acid, 2-[methyl((undecafluoropentyl)sulfonyl)amino]ethyl ester                                                                                                                                                                                                                                           | 93491-54-4   | CN(CCOC(=O)C=C)C(F)(F)C(F)(F)C(F)(F)C(F)(F)C(F)(F)C(F)(F)F                                | -9.25 | 38.64 | 2.95 | P | IN  |
| QL01709 | 2-Propenoic acid, 2-[methyl((nonafluorobutyl)sulfonyl)amino]ethyl ester                                                                                                                                                                                                                                              | 67584-56-9   | CN(CCOC(=O)C=C)S(=O)(=O)C(F)(F)C(F)(F)C(F)(F)C(F)(F)C(F)(F)F                              | -8.15 | 28.95 | 2.76 | P | OUT |
| QL01710 | 2-Propenoic acid, 2-[methyl((nonafluorobutyl)sulfonyl)amino]ethyl ester Bis[N-methyl(perfluorobutyl)sulfonamidoethyl]phosphoric acid                                                                                                                                                                                 | 67584-55-8   | CN(CCOC(=O)C=C)S(=O)(=O)C(F)(F)C(F)(F)C(F)(F)C(F)(F)F                                     | -7.80 | 25.71 | 2.71 | P | OUT |
| QL01711 | 2-{Methyl((nonafluorobutyl)sulfonyl)amino]ethyl phosphate                                                                                                                                                                                                                                                            | 120945-47-3  | CN(CCOP(O)(O)O)CCN(C)S(=O)(=O)C(F)(F)C(F)(F)C(F)(F)C(F)(F)S(=O)(=O)C(F)(F)C(F)(F)C(F)(F)F | -9.48 | 30.00 | 3.28 | P | OUT |
| QL01712 | 2,2,3,3,4,4,4-Heptafluoro-N-hydroxy-N-methylbutanamide                                                                                                                                                                                                                                                               | 147545-41-3  | CN(CCOP(O)(O)O)S(=O)(=O)C(F)(F)C(F)(F)C(F)(F)C(F)(F)F                                     | -7.39 | 26.47 | 2.52 | P | OUT |
| QL01713 | N,N-Dimethyl perfluorooctane sulfonamide                                                                                                                                                                                                                                                                             | 193008-44-5  | CN(O)C(=O)C(F)(F)C(F)(F)C(F)(F)F                                                          | -6.41 | 36.84 | 1.83 | P | IN  |
| QL01714 | 1,1,2,2,3,3,4,4,4-Nonafluoro-N-methyl-N-(trimethylstannyl)butane-1-sulfonamide                                                                                                                                                                                                                                       | 213181-78-3  | CN(S(=O)(=O)C(F)(F)C(F)(F)C(F)(F)C(F)(F)C(F)(F)C(F)(F)C(F)(F)F)O)C                        | -8.69 | 45.95 | 2.51 | P | IN  |
| QL01715 | Heptadecafluoro-N-methylisooctanesulphonamide                                                                                                                                                                                                                                                                        | 41006-33-1   | CN(S(=O)(=O)C(F)(F)C(F)(F)C(F)(F)C(F)(F)C(F)(F)C(F)(F)C(F)(F)C(F)(F)F                     | -6.59 | 27.27 | 2.17 | P | OUT |
| QL01716 | 1-Heptanesulfonamide, 1,1,2,2,3,3,4,4,5,5,6,6,7,7-pentadecafluoro-N-methyl-1-Hexanesulfonamide, 1,1,2,2,3,3,4,4,5,5,6,6,6-tridecafluoro-N-methyl-1-Pentanesulfonamide, 1,1,2,2,3,3,4,4,5,5,5-undecafluoro-N-methyl-1-Butanesulfonamide, 1,1,2,2,3,3,4,4,4-nonafluoro-N-methyl-1-Methyl-2-(nonafluorobutyl)-1H-indole | 93894-71-4   | CN(S(=O)(=O)C(F)(F)C(F)(F)C(F)(F)C(F)(F)C(F)(F)C(F)(F)C(F)(F)C(F)(F)F                     | -8.77 | 50.00 | 2.43 | P | IN  |
| QL01717 | 1-Heptanesulfonamide, 1,1,2,2,3,3,4,4,5,5,6,6,7,7-pentadecafluoro-N-methyl-1-Hexanesulfonamide, 1,1,2,2,3,3,4,4,5,5,6,6,6-tridecafluoro-N-methyl-1-Pentanesulfonamide, 1,1,2,2,3,3,4,4,5,5,5-undecafluoro-N-methyl-1-Butanesulfonamide, 1,1,2,2,3,3,4,4,4-nonafluoro-N-methyl-1-Methyl-2-(nonafluorobutyl)-1H-indole | 68259-14-3   | CN[S](=O)(=O)C(F)(F)C(F)(F)C(F)(F)C(F)(F)C(F)(F)C(F)(F)C(F)(F)F                           | -8.67 | 48.39 | 2.44 | P | IN  |
| QL01718 | 1-Heptanesulfonamide, 1,1,2,2,3,3,4,4,5,5,6,6,6-tridecafluoro-N-methyl-1-Pentanesulfonamide, 1,1,2,2,3,3,4,4,5,5,5-undecafluoro-N-methyl-1-Butanesulfonamide, 1,1,2,2,3,3,4,4,4-nonafluoro-N-methyl-1-Methyl-2-(nonafluorobutyl)-1H-indole                                                                           | 68259-15-4   | CN[S](=O)(=O)C(F)(F)C(F)(F)C(F)(F)C(F)(F)C(F)(F)C(F)(F)F                                  | -8.03 | 46.43 | 2.23 | P | IN  |
| QL01719 | 1-Heptanesulfonamide, 1,1,2,2,3,3,4,4,5,5,6,6,6-tridecafluoro-N-methyl-1-Pentanesulfonamide, 1,1,2,2,3,3,4,4,5,5,5-undecafluoro-N-methyl-1-Butanesulfonamide, 1,1,2,2,3,3,4,4,4-nonafluoro-N-methyl-1-Methyl-2-(nonafluorobutyl)-1H-indole                                                                           | 68298-13-5   | CN[S](=O)(=O)C(F)(F)C(F)(F)C(F)(F)C(F)(F)C(F)(F)F                                         | -7.68 | 44.00 | 2.15 | P | IN  |
| QL01720 | 1-Methyl-2-(nonafluorobutyl)-1H-indole                                                                                                                                                                                                                                                                               | 68298-12-4   | CN[S](=O)(=O)C(F)(F)C(F)(F)C(F)(F)C(F)(F)F                                                | -6.84 | 40.91 | 1.89 | P | IN  |
| QL01721 | 3,3,4,4,5,5-Heptafluoro-1-(3-methyl-1,3-benzothiazol-2(3H)-ylidene)pentan-2-one                                                                                                                                                                                                                                      | 1608112-35-1 | Cn1c(cc2ccccc12)C(F)(F)C(F)(F)C(F)(F)C(F)(F)F                                             | -6.91 | 29.03 | 2.25 | P | IN  |
| QL01722 |                                                                                                                                                                                                                                                                                                                      | 41131-07-1   | CN1C(Sc2ccccc12)=CC(=O)C(F)(F)C(F)(F)C(F)(F)F                                             | -6.85 | 22.58 | 2.40 | P | OUT |



[illegible]



|         |                                                                                                                                           |              |                                                                                         |        |       |      |   |     |
|---------|-------------------------------------------------------------------------------------------------------------------------------------------|--------------|-----------------------------------------------------------------------------------------|--------|-------|------|---|-----|
| QL01771 | Methyl 4-trifluoroethenoxy-2,2,3,4,4-hexafluorobutanoate                                                                                  | 19190-61-5   | COC(=O)C(F)C(F)C(F)C(F)C(F)OC(F)=C(F)F                                                  | -7.67  | 40.91 | 2.23 | P | IN  |
| QL01772 | Methyl 3-chloroperfluoropropanoate                                                                                                        | 127589-63-3  | COC(=O)C(F)C(F)C(F)Cl                                                                   | -5.53  | 35.71 | 1.49 | P | IN  |
| QL01773 | Methyl pentafluoropropionate                                                                                                              | 378-75-6     | COC(=O)C(F)C(F)C(F)F                                                                    | -5.53  | 35.71 | 1.49 | P | IN  |
| QL01774 | Methyl 2,2,3,3-tetrafluoro-3-[(1,1,1,2,3,3,3-heptafluoropropan-2-yl)oxy]propanoate                                                        | 51502-43-3   | COC(=O)C(F)C(F)C(F)OC(F)(C(F)F)C(F)F                                                    | -7.78  | 45.83 | 2.14 | P | IN  |
| QL01775 | Methyl perfluoro(8-(fluoroformyl)-5-methyl-4,7-dioxananoate)                                                                              | 69116-73-0   | COC(=O)C(F)C(F)C(F)OC(F)(C(F)F)C(F)OC(F)=O)C(F)F                                        | -8.51  | 45.45 | 2.45 | P | IN  |
| QL01776 | Methyl perfluoro(3-(1-ethenyloxypropan-2-yloxy)propanoate)                                                                                | 63863-43-4   | COC(=O)C(F)C(F)C(F)OC(F)(C(F)F)C(F)C(F)OC(F)=C(F)F                                      | -8.39  | 44.83 | 2.42 | P | IN  |
| QL01777 | Perfluoromethoxypropionic acid methyl ester                                                                                               | 356-69-4     | COC(=O)C(F)C(F)C(F)OC(F)F                                                               | -6.70  | 38.89 | 1.89 | P | IN  |
| QL01778 | Methyl perfluoro-3-(3-methoxypropoxy)-3H-propanoate                                                                                       | 958445-54-0  | COC(=O)C(F)C(F)OC(F)C(F)C(F)C(F)OC(F)F                                                  | -8.47  | 42.86 | 2.51 | P | IN  |
| QL01779 | Methyl difluoro[1,1,2,2-tetrafluoro-2-(nonafluorobutoxy)ethoxy]acetate                                                                    | 129301-40-2  | COC(=O)C(F)OC(F)(F)C(F)OC(F)(F)C(F)C(F)C(F)F                                            | -9.30  | 48.39 | 2.70 | P | IN  |
| QL01780 | Methyl perfluoro-3,6,9-trioxatridecanoate                                                                                                 | 330562-42-0  | COC(=O)C(F)OC(F)C(F)C(F)OC(F)C(F)OC(F)C(F)C(F)C(F)C(F)F                                 | -10.00 | 50.00 | 2.94 | P | IN  |
| QL01781 | Methyl difluoro[1,1,2,2-tetrafluoro-2-[1,1,2,2-tetrafluoro-2-(trifluoromethoxy)ethoxy]ethoxy]acetate                                      | 169289-58-1  | COC(=O)C(F)OC(F)(F)C(F)OC(F)(F)OC(F)F                                                   | -9.04  | 44.83 | 2.69 | P | IN  |
| QL01782 | Methyl perfluoro-3,6-dioxahепtanoate                                                                                                      | 39187-41-2   | COC(=O)C(F)OC(F)C(F)C(F)OC(F)F                                                          | -7.67  | 40.91 | 2.23 | P | IN  |
| QL01783 | Methyl 2,3,3,3-tetrafluoro-2-[(undecafluoropentyl)oxy]propanoate                                                                          | 220369-95-9  | COC(=O)C(F)OC(F)C(F)C(F)C(F)C(F)C(F)C(F)F                                               | -8.69  | 50.00 | 2.40 | P | IN  |
| QL01784 | Methyl perfluoro(2-propoxypropanoate)                                                                                                     | 13140-34-6   | COC(=O)C(F)OC(F)C(F)C(F)C(F)C(F)F                                                       | -7.52  | 45.83 | 2.03 | P | IN  |
| QL01785 | Methyl 2,3,3,3-tetrafluoro-2-(pentafluoroethoxy)propanoate                                                                                | 117516-09-3  | COC(=O)C(F)OC(F)C(F)C(F)C(F)F                                                           | -6.84  | 42.86 | 1.84 | P | IN  |
| QL01786 | Methyl 2,3,3,3-tetrafluoro-2-[1,1,2,3,3-hexafluoro-2-(heptafluoropropoxy)propoxy]propanoate                                               | 26131-32-8   | COC(=O)C(F)OC(F)C(F)C(F)OC(F)C(F)C(F)C(F)C(F)F                                          | -8.89  | 50.00 | 2.48 | P | IN  |
| QL01787 | Methylperfluoro-2,5,8-trimethyl-3,6,9-trioxadodecanoic acid                                                                               | 39187-47-8   | COC(=O)C(F)OC(F)C(F)C(F)OC(F)C(F)C(F)C(F)C(F)C(F)C(F)F                                  | -9.79  | 52.27 | 2.79 | P | IN  |
| QL01788 | Perfluorotetramethyltetraoxapentadecanoicacidmethyl                                                                                       | 133609-46-8  | COC(=O)C(F)OC(F)C(F)C(F)OC(F)C(F)OC(F)C(F)C(F)C(F)C(F)C(F)F                             | -10.58 | 53.70 | 3.08 | P | OUT |
| QL01789 | 2,4,4,5,7,7,8,10,10,11,13,13,14,16,16,17,17,18,18,18-icosafuoro-2,5,8,11,14-pentakis(trifluoromethyl)-3,6,9,12,15-pentaaoxatodecan-1-oate | 1005033-64-6 | COC(=O)C(F)OC(F)C(F)C(F)OC(F)C(F)C(F)OC(F)C(F)C(F)C(F)C(F)C(F)C(F)F                     | -11.17 | 54.69 | 3.29 | P | OUT |
| QL01790 | Methyl 2,3,4,4,5,6,6,6-nonafluorohex-2-enoate                                                                                             | 88022-46-2   | COC(=O)C=C(C(F)C(F)C(F)F)                                                               | -7.65  | 42.86 | 2.17 | P | IN  |
| QL01791 | Methyl 3-amino-4,4,5,5,6,6,6-heptafluorohex-2-enoate                                                                                      | 106203-17-2  | COC(=O)C=C(N)C(F)C(F)C(F)F                                                              | -6.85  | 30.43 | 2.18 | P | IN  |
| QL01792 | Methyl 4,4,5,5,6,6,6-heptafluorohex-2-enoate                                                                                              | 813-06-9     | COC(=O)C=CC(F)C(F)C(F)F                                                                 | -6.96  | 33.33 | 2.15 | P | IN  |
| QL01793 | Methyl 3-(heptadecafluorooctyl)benzoate                                                                                                   | 80791-11-3   | COC(=O)C1=CC=C(C=C1)C(F)C(F)C(F)C(F)C(F)C(F)C(F)F                                       | -9.27  | 40.48 | 2.90 | P | IN  |
| QL01794 | Methyl 4-(heptadecafluorooctyl)benzoate                                                                                                   | 80791-12-4   | COC(=O)C1=CC=C(C=C1)C(F)C(F)C(F)C(F)C(F)C(F)C(F)F                                       | -9.38  | 40.48 | 2.95 | P | IN  |
| QL01795 | Methyl 4-(nonafluorobutyl)benzoate                                                                                                        | 88951-00-2   | COC(=O)C1=CC=C(C=C1)C(F)C(F)C(F)F                                                       | -7.73  | 30.00 | 2.56 | P | OUT |
| QL01796 | Methyl 4-(heptafluoropropyl)benzoate                                                                                                      | 64299-47-4   | COC(=O)C1=CC=C(C=C1)C(F)C(F)C(F)F                                                       | -7.32  | 25.93 | 2.50 | P | OUT |
| QL01797 | Methyl 5-(heptafluoropropyl)furan-2-carboxylate                                                                                           | 104939-25-5  | COC(=O)C1=CC=C(O1)C(F)C(F)F                                                             | -7.03  | 29.17 | 2.29 | P | IN  |
| QL01798 | Methyl 2-(heptafluoropropyl)-6-methoxybenzoate                                                                                            | 109296-89-1  | COC(=O)c1c(OC)cccc1C(F)C(F)F                                                            | -6.16  | 22.58 | 2.12 | P | OUT |
| QL01799 | Methyl 2-methoxy-6-[(1,1,2,2,3,3,4,4,4-nonafuorobutane-1-sulfonyl)oxy]benzoate                                                            | 475630-76-3  | COC(=O)c1c(OC)cccc1OS(=O)=O=C(F)C(F)C(F)C(F)F                                           | -7.16  | 23.68 | 2.50 | P | OUT |
| QL01800 | Methyl 3,4,5-tris(1,1,2-trifluoro-2-(heptafluoropropoxy)ethoxy]benzoate                                                                   | 1233312-86-1 | COC(=O)c1cc(OC(F)C(F)C(F)C(F)C(F)C(F)C(F)OC(F)C(F)C(F)C(F)F)c(OC(F)C(F)C(F)C(F)C(F)F)c1 | -10.11 | 43.48 | 3.17 | P | OUT |
| QL01801 | Methyl 4-(1,1,1,2,3,3,3-heptafluoropropan-2-yl)benzoate                                                                                   | 51114-06-8   | COC(=O)c1ccc(cc1)C(F)C(F)C(F)F                                                          | -6.48  | 25.93 | 2.16 | P | OUT |
| QL01802 | Methyl 4-(pentadecafluoroheptyl)cyclohexane-1-carboxylate                                                                                 | 88951-17-1   | COC(=O)C1CCCC(C1)C(F)C(F)C(F)C(F)C(F)F                                                  | -8.81  | 33.33 | 2.91 | P | IN  |
| QL01803 | Methyl 4-(tridecafluorohexyl)cyclohexane-1-carboxylate                                                                                    | 88951-16-0   | COC(=O)C1CCCC(C1)C(F)C(F)C(F)C(F)C(F)F                                                  | -8.28  | 30.95 | 2.76 | P | OUT |
| QL01804 | Methyl 4-(undecafluoropentyl)cyclohexane-1-carboxylate                                                                                    | 88951-15-9   | COC(=O)C1CCCC(C1)C(F)C(F)C(F)C(F)F                                                      | -7.95  | 28.21 | 2.70 | P | OUT |
| QL01805 | Methyl 4-(nonafluorobutyl)cyclohexane-1-carboxylate                                                                                       | 88951-14-8   | COC(=O)C1CCCC(C1)C(F)C(F)C(F)F                                                          | -7.40  | 25.00 | 2.56 | P | OUT |
| QL01806 | Methyl 2,4-dichloro-3-[(1,1,2,2,3,3,4,4,4-nonafuorobutane-1-sulfonyl)oxy]benzoate                                                         | 1451750-40-5 | COC(=O)c1ccc(Cl)cc1OS(=O)=O=C(F)C(F)C(F)C(F)Cl                                          | -8.07  | 32.35 | 2.63 | P | IN  |
| QL01807 | Methyl 4-[(1,1,1,4,5,5,5-heptafluoro-3-(1,1,1,2,3,3,3-heptafluoropropan-2-yl)-4-(trifluoromethyl)pent-2-en-2-yl]oxy]benzoate              | 66432-83-5   | COC(=O)c1ccc(OC=C(C(F)C(F)C(F)C(F)C(F)C(F)C(F)C(F)F)cc1                                 | -8.06  | 38.64 | 2.46 | P | IN  |
| QL01808 | Methyl 4,4,5,5,6,6,7,7,7-nonafluoro-3-oxoheptanoate                                                                                       | 89129-70-4   | COC(=O)CC(=O)C(F)C(F)C(F)C(F)F                                                          | -7.41  | 36.00 | 2.26 | P | IN  |
| QL01809 | Methyl 4,4,5,5,6,6,6-heptafluoro-3-oxohexanoate                                                                                           | 89129-68-0   | COC(=O)CC(=O)C(F)C(F)C(F)F                                                              | -6.94  | 31.82 | 2.18 | P | IN  |
| QL01810 | Methyl 4,6,6-trichloro-7,7,7-trifluoro-3,3-dimethylheptanoate                                                                             | 72714-62-6   | COC(=O)CC(C)(C)C(Cl)C(Cl)C(F)F                                                          | -6.13  | 18.75 | 2.21 | P | OUT |
| QL01811 | Methyl 4,4,5,5,6,6,6-heptafluoro-3,3-dihydroxyhexanoate                                                                                   | 89148-14-1   | COC(=O)CC(O)(O)C(F)C(F)C(F)F                                                            | -6.70  | 28.00 | 2.19 | P | OUT |
| QL01812 | Methyl 5,5,6,6,7,7,8,8,9,9-undecafluoro-4-oxononanoate                                                                                    | 1456734-51-2 | COC(=O)CCC(=O)C(F)C(F)C(F)C(F)C(F)F                                                     | -8.04  | 35.48 | 2.53 | P | IN  |



|         |                                                                                                                                                                                   |              |                                                                                                                                                                                     |       |       |      |   |     |
|---------|-----------------------------------------------------------------------------------------------------------------------------------------------------------------------------------|--------------|-------------------------------------------------------------------------------------------------------------------------------------------------------------------------------------|-------|-------|------|---|-----|
| QL01813 | Methyl 4,4,5,5,6,6,7,7,8,8,9,9,10,10,11,11-heptadecafluoroundecanoate                                                                                                             | 132424-37-4  | COC(=O)CCC(F)(F)C(F)(F)C(F)(F)C(F)(F)C(F)(F)C(F)(F)C(F)(F)F                                                                                                                         | -9.16 | 44.74 | 2.74 | P | IN  |
| QL01814 | Methyl 3-(perfluorohexyl)propanoate                                                                                                                                               | 110260-75-8  | COC(=O)CCC(F)(F)C(F)(F)C(F)(F)C(F)(F)C(F)(F)C(F)(F)F                                                                                                                                | -8.35 | 40.63 | 2.52 | P | IN  |
| QL01815 | Methyl 2H,2H,3H,3H-perfluoroheptanoate                                                                                                                                            | 132424-36-3  | COC(=O)CCC(F)(F)C(F)(F)C(F)(F)C(F)(F)F                                                                                                                                              | -7.33 | 34.62 | 2.27 | P | IN  |
| QL01816 | Methyl 4,4,5,5,6,6-heptafluorohexanoate                                                                                                                                           | 2070-60-2    | COC(=O)CCC(F)(F)C(F)(F)C(F)(F)F                                                                                                                                                     | -6.76 | 30.43 | 2.15 | P | IN  |
| QL01817 | Methyl N-(2,2,3,3,4,4,4-heptafluorobutanoyl)glycinate                                                                                                                             | 81084-29-9   | COC(=O)CNC(=O)C(F)(F)C(F)(F)C(F)(F)F                                                                                                                                                | -6.95 | 29.17 | 2.26 | P | IN  |
| QL01818 | Dimethyl 2-(perfluoropropyl)-p-benzenedicarbamate                                                                                                                                 | 25642-22-2   | COC(=O)NC1=CC(=C(NC(=O)OC)C=C1)C(F)(F)C(F)(F)C(F)(F)F                                                                                                                               | -6.80 | 18.92 | 2.48 | P | OUT |
| QL01819 | 2,2,3,3,4,4,4-Heptafluorobutyl methyl carbonate                                                                                                                                   | 277332-95-3  | COC(=O)OCC(F)(F)C(F)(F)C(F)(F)F                                                                                                                                                     | -6.96 | 33.33 | 2.15 | P | IN  |
| QL01820 | 1,1,1,2,2,3,3,4,4,5,5,6,6-Tridecafluoro-8,8-dimethyloctane                                                                                                                        | 142502-76-9  | COC(C(F)(F)C(F)(F)C(F)(F)C(F)(F)C(F)(F)C(F)(F)F)OC                                                                                                                                  | -8.03 | 38.24 | 2.45 | P | IN  |
| QL01821 | 3-Methoxyperfluoro(2-methylpentane)                                                                                                                                               | 132182-92-4  | COC(F)(C(F)(F)C(F)(F)C(F)(F)C(F)(F)C(F)(F)F                                                                                                                                         | -7.31 | 54.17 | 1.72 | P | IN  |
| QL01822 | Heptafluoroisopropyl methyl ether                                                                                                                                                 | 22052-84-2   | COC(F)(C(F)(F)F)C(F)(F)F                                                                                                                                                            | -5.75 | 46.67 | 1.28 | P | IN  |
| QL01823 | 1,1,3,3,4,4,5,5,6,6-Undecafluoro-1-methoxyhexan-2-one                                                                                                                             | 106693-00-9  | COC(F)(F)C(=O)C(F)(F)C(F)(F)C(F)(F)C(F)(F)F                                                                                                                                         | -7.97 | 47.83 | 2.17 | P | IN  |
| QL01824 | 1,1,1,3,3-Pentafluoro-3-methoxy-2-(trifluoromethyl)propane                                                                                                                        | 382-26-3     | COC(F)(F)C(C(F)(F)F)C(F)(F)F                                                                                                                                                        | -5.96 | 44.44 | 1.43 | P | IN  |
| QL01825 | 1,1,1,2,2,3,3,4,4,5,5,6,6-Tridecafluoro-6-methoxyhexane                                                                                                                           | 226909-72-4  | COC(F)(F)C(F)(F)C(F)(F)C(F)(F)C(F)(F)C(F)(F)F                                                                                                                                       | -8.37 | 54.17 | 2.15 | P | IN  |
| QL01826 | 1,1,1,2,2,3,3,4,4,5,5-Undecafluoro-5-methoxypentane                                                                                                                               | 181214-74-4  | COC(F)(F)C(F)(F)C(F)(F)C(F)(F)C(F)(F)F                                                                                                                                              | -7.61 | 52.38 | 1.89 | P | IN  |
| QL01827 | Perfluorobutyl methyl ether                                                                                                                                                       | 163702-07-6  | COC(F)(F)C(F)(F)C(F)(F)C(F)(F)F                                                                                                                                                     | -7.25 | 50.00 | 1.81 | P | IN  |
| QL01828 | Heptafluoro-1-methoxypropane                                                                                                                                                      | 375-03-1     | COC(F)(F)C(F)(F)C(F)(F)F                                                                                                                                                            | -6.18 | 46.67 | 1.46 | P | IN  |
| QL01829 | (1E)-1,2,3,3,4,4,5,5,6,6-Undecafluoro-1-methoxyhex-1-ene                                                                                                                          | 62949-64-8   | COC(F)=C(F)C(F)(F)C(F)(F)C(F)(F)C(F)(F)F                                                                                                                                            | -8.16 | 50.00 | 2.18 | P | IN  |
| QL01830 | 2,2,3,3,4,4,4-Heptafluoro-1-methoxybutan-1-ol                                                                                                                                     | 377-52-6     | COC(O)C(F)(F)C(F)(F)C(F)(F)F                                                                                                                                                        | -6.43 | 36.84 | 1.84 | P | IN  |
| QL01831 | 2-Methoxyperfluoro(2,5-di(propan-2-yl)oxolane)                                                                                                                                    | 957209-18-6  | COC1(OCC(F)(C(F)C(F)F)C(F)C(F)F)C(F)C(F)C1(F)C(F)C(F)C(F)F                                                                                                                          | -8.11 | 54.29 | 2.04 | P | IN  |
| QL01832 | 2-(Heptafluoropropyl)-1-methoxy-4-methylbenzene                                                                                                                                   | 87461-66-3   | COC1=C(C=C(C)C=C1)C(F)(F)C(F)(F)C(F)(F)F                                                                                                                                            | -5.79 | 25.00 | 1.90 | P | OUT |
| QL01833 | 1-Chloro-3,3,4,4,5,5-hexafluoro-2-methoxycyclopentene                                                                                                                             | 336-34-5     | COC1=C(C)C(C(F)(F)C(F)(F)C1)F                                                                                                                                                       | -5.98 | 41.18 | 1.53 | P | IN  |
| QL01834 | N-[2-{3,4-Dimethoxyphenyl}ethyl]-2,2,3,3,4,4,4-heptafluorobutanamide                                                                                                              | 13230-87-0   | COC1=C(OC)C=C(C(CNC(=O)C(F)(F)C(F)(F)C(F)(F)C=C1                                                                                                                                    | -7.32 | 17.95 | 2.72 | P | OUT |
| QL01835 | (1Z)-2,2,3,3,4,4,4-Heptafluoro-N-[4-methoxy-2-methylphenyl]butanimidoyl chloride                                                                                                  | 923569-77-1  | COC1=CC(C)=C(C=C1)N=C(C)/C(F)(F)C(F)(F)C(F)(F)F                                                                                                                                     | -7.38 | 25.81 | 2.53 | P | OUT |
| QL01836 | (1Z)-N-[2-(Bromomethyl)-4-methoxyphenyl]-2,2,3,3,4,4,4-heptafluorobutanimidoyl chloride                                                                                           | 923569-78-2  | COC1=CC(CBr)=C(C=C1)N=C(C)/C(F)(F)C(F)(F)C(F)(F)F                                                                                                                                   | -7.58 | 29.03 | 2.52 | P | OUT |
| QL01837 | 2,5-Dimethoxyphenyl heptafluorobutanoate                                                                                                                                          | 87461-68-5   | COC1=CC(OC(=O)C(F)(F)C(F)(F)C(F)(F)F)=C(OC)C=C1                                                                                                                                     | -6.78 | 21.88 | 2.39 | P | OUT |
| QL01838 | 1,1-Di-(4-methoxyphenyl)-1-[4-(1H,1H,2H,2H-perfluorodecyl)phenyl]methyl chloride                                                                                                  | 865758-36-7  | COC1=CC=C(C=C1)C(C)C1=CC=C(CCC(F)(F)C(F)(F)C(F)(F)C(F)(F)C(F)(F)C(F)(F)C(F)(F)C=C1)C1=CC=C(OC)C=C1                                                                                  | -9.35 | 24.66 | 3.38 | P | OUT |
| QL01839 | 1-(Chloro[4-(2-(perfluorooctyl)ethyl)phenyl]phenylmethyl)-4-methoxybenzene                                                                                                        | 865758-37-8  | COC1=CC=C(C=C1)C(C)C1=CC=CC=C1)C1=CC=C(CCC(F)(F)C(F)(F)C(F)(F)C(F)(F)C(F)(F)C(F)(F)C(F)(F)C=C1                                                                                      | -9.44 | 26.09 | 3.37 | P | OUT |
| QL01840 | [4-(3,3,4,4,5,5,6,6,7,7,8,8,9,9,10,10,10-Heptadecafluorodecyl)phenyl]bis(4-methoxyphenyl)methanol                                                                                 | 865758-47-0  | COC1=CC=C(C=C1)C(O)C1=CC=C(CCC(F)(F)C(F)(F)C(F)(F)C(F)(F)C(F)(F)C(F)(F)C(F)(F)C=C1)C1=CC=C(OC)C=C1                                                                                  | -9.24 | 22.97 | 3.38 | P | OUT |
| QL01841 | Thymidine, 5'-O-[[4-(1H,1H,2H,2H-perfluorodecyl)phenyl]bis(4-methoxyphenyl)methyl]-, 3'-[2-cyanoethyl N,N-bis(1-methylethyl)phosphoramidite]                                      | 902456-09-1  | COC1=CC=C(C=C1)C(OC[C@H]1O[C@@H](C[C@@H](C1)OP(OCC#N)N(C(C)C)C(C)C)N1C=C(C)C(=O)NC1=O)(C1=CC=C(CCC(F)(F)C(F)(F)C(F)(F)C(F)(F)C(F)(F)C(F)(F)C(F)(F)C=C1)C1=CC=C(OC)C=C1              | -9.27 | 12.88 | 3.67 | P | OUT |
| QL01842 | Cytidine, N-benzoyl-2'-deoxy-5'-O-[[4-(1H,1H,2H,2H-perfluorodecyl)phenyl]bis(4-methoxyphenyl)methyl]-, 3'-[2-cyanoethyl N,N-bis(1-methylethyl)phosphoramidite]                    | 1401422-19-2 | COC1=CC=C(C=C1)C(OC[C@H]1O[C@@H](C[C@@H](C1)OP(OCC#N)N(C(C)C)C(C)C)N1C=CC(NC(=O)C2=CC=CC=C2)=NC1=O)(C1=CC=C(CCC(F)(F)C(F)(F)C(F)(F)C(F)(F)C(F)(F)C(F)(F)C(F)(F)C=C1)C1=CC=C(OC)C=C1 | -9.78 | 11.97 | 3.91 | P | OUT |
| QL01843 | Guanosine, 2'-deoxy-5'-O-[[4-(1H,1H,2H,2H-perfluorodecyl)phenyl]bis(4-methoxyphenyl)methyl]-N-(2-methyl-1-oxopropyl)-, 3'-[2-cyanoethyl N,N-bis(1-methylethyl)phosphoramidite]    | 1401422-21-6 | COC1=CC=C(C=C1)C(OC[C@H]1OC(C)[C@@H](C1)OP(OCC#N)N(C(C)C)C(C)C)N1C=NC2=C1N=C(NC(=O)C(C)C)NC2=O)(C1=CC=C(CCC(F)(F)C(F)(F)C(F)(F)C(F)(F)C(F)(F)C(F)(F)C(F)(F)C=C1)C1=CC=C(OC)C=C1     | -9.51 | 11.81 | 3.80 | P | OUT |
| QL01844 | Guanosine, 2'-deoxy-5'-O-[[4-(1H,1H,2H,2H-perfluorodecyl)phenyl](4-methoxyphenyl)phenylmethyl]-N-(2-methyl-1-oxopropyl)-, 3'-[2-cyanoethyl N,N-bis(1-methylethyl)phosphoramidite] | 1401422-22-7 | COC1=CC=C(C=C1)C(OC[C@H]1OC(C)[C@@H](C1)OP(OCC#N)N(C(C)C)C(C)C)N1C=NC2=C1N=C(NC(=O)C(C)C)NC2=O)(C1=CC=CC=C1)C1=CC=C(CCC(F)(F)C(F)(F)C(F)(F)C(F)(F)C(F)(F)C(F)(F)C(F)(F)C=C1         | -9.53 | 12.14 | 3.80 | P | OUT |
| QL01845 | Butanoic acid, heptafluoro-, (4-methoxyphenyl)methyl ester                                                                                                                        | 87461-67-4   | COC1=CC=C(COC(=O)C(F)(F)C(F)(F)C(F)(F)C=C1                                                                                                                                          | -7.56 | 22.58 | 2.70 | P | OUT |
| QL01846 | 2-(Heptafluoropropyl)-5-methoxy-1H-indole                                                                                                                                         | 923569-79-3  | COC1=CC2=C(NC=C2)C(F)(F)C(F)(F)C(F)(F)C=C1                                                                                                                                          | -7.12 | 24.14 | 2.47 | P | OUT |
| QL01847 | 4,9-Dimethoxy-7-(nonafluorobutyl)-5H-furo[3,2-g][1]benzopyran-5-one                                                                                                               | 376380-66-4  | COC1c2C(=O)C=C(Oc2c(OC)c2occc12)C(F)(F)C(F)(F)C(F)(F)F                                                                                                                              | -7.11 | 22.50 | 2.51 | P | OUT |
| QL01848 | 7-(Heptafluoropropyl)-4,9-dimethoxy-5H-furo[3,2-g][1]benzopyran-5-one                                                                                                             | 376383-49-2  | COC1c2C(=O)C=C(Oc2c(OC)c2occc12)C(F)(F)C(F)(F)C(F)(F)F                                                                                                                              | -6.66 | 18.92 | 2.43 | P | OUT |
| QL01849 | 7-Hydroxy-4,9-dimethoxy-7-(nonafluorobutyl)-6,7-dihydro-5H-furo[3,2-g][1]benzopyran-5-one                                                                                         | 376382-61-5  | COC1c2C(=O)CC(O)C(Oc2c(OC)c2occc12)C(F)(F)C(F)(F)C(F)(F)C(F)(F)F                                                                                                                    | -7.05 | 20.93 | 2.53 | P | OUT |















|         |                                                                               |             |                                                                                                                                                                                                                                                                                                                                                                                                                                                                                                                                                                                                                                                                                                                                                                                                                                                                                                                                                                                                                                                                                                                                                                                                                                                                                                                                                                                                                                                                                                                                                                                                                                                                                                                                                                                                                                                                                                                                                                                                                                                                                                                                                                                                                                                                                                                                                                                                                                                                                                                                                                                                                                                                                                                                                                                                                                                                                                                                                                                                                                                                                                                                                                                                                                                                                                                                                                                                                                                                                                                                                                                                                                                                                                                                                                                                                                                                                                                                                                                                                                                                                                                                                                                                                                                                                                                                                                                                                                                                                                                                                                                                                                                                                                                                                                                                                                                                                                                                                                                                                                                                                                                                                                                                                                                                                                                                                                                                                                                                                                                                                                                                                                                                                                                                                                                                                                                                                                                                                                                                                                                                                                                                                                                                                                                                                                                                                                                                                                                                                                                                                                                                                                                                                                                                                                                                                                                                                                                                                                                                                                                                                                                                                                                                                                                                                                                                                                                                                                                                                                                                                                                                                                                                                                                                                                                                                                                                                                                                                                                                                                                                                                                                                                                                                                                                                                                                                                                                                                                                                                                                                                                                                                                                                                                                                                                                                                                                                                                                                                                                                                                                                                                                                                                                                                                                                                                                                                                                                                                                                                                                                                                                                                                                                                                                                                                                                                                                                                                                                                                                                                                                                             |        |       |      |   |     |
|---------|-------------------------------------------------------------------------------|-------------|---------------------------------------------------------------------------------------------------------------------------------------------------------------------------------------------------------------------------------------------------------------------------------------------------------------------------------------------------------------------------------------------------------------------------------------------------------------------------------------------------------------------------------------------------------------------------------------------------------------------------------------------------------------------------------------------------------------------------------------------------------------------------------------------------------------------------------------------------------------------------------------------------------------------------------------------------------------------------------------------------------------------------------------------------------------------------------------------------------------------------------------------------------------------------------------------------------------------------------------------------------------------------------------------------------------------------------------------------------------------------------------------------------------------------------------------------------------------------------------------------------------------------------------------------------------------------------------------------------------------------------------------------------------------------------------------------------------------------------------------------------------------------------------------------------------------------------------------------------------------------------------------------------------------------------------------------------------------------------------------------------------------------------------------------------------------------------------------------------------------------------------------------------------------------------------------------------------------------------------------------------------------------------------------------------------------------------------------------------------------------------------------------------------------------------------------------------------------------------------------------------------------------------------------------------------------------------------------------------------------------------------------------------------------------------------------------------------------------------------------------------------------------------------------------------------------------------------------------------------------------------------------------------------------------------------------------------------------------------------------------------------------------------------------------------------------------------------------------------------------------------------------------------------------------------------------------------------------------------------------------------------------------------------------------------------------------------------------------------------------------------------------------------------------------------------------------------------------------------------------------------------------------------------------------------------------------------------------------------------------------------------------------------------------------------------------------------------------------------------------------------------------------------------------------------------------------------------------------------------------------------------------------------------------------------------------------------------------------------------------------------------------------------------------------------------------------------------------------------------------------------------------------------------------------------------------------------------------------------------------------------------------------------------------------------------------------------------------------------------------------------------------------------------------------------------------------------------------------------------------------------------------------------------------------------------------------------------------------------------------------------------------------------------------------------------------------------------------------------------------------------------------------------------------------------------------------------------------------------------------------------------------------------------------------------------------------------------------------------------------------------------------------------------------------------------------------------------------------------------------------------------------------------------------------------------------------------------------------------------------------------------------------------------------------------------------------------------------------------------------------------------------------------------------------------------------------------------------------------------------------------------------------------------------------------------------------------------------------------------------------------------------------------------------------------------------------------------------------------------------------------------------------------------------------------------------------------------------------------------------------------------------------------------------------------------------------------------------------------------------------------------------------------------------------------------------------------------------------------------------------------------------------------------------------------------------------------------------------------------------------------------------------------------------------------------------------------------------------------------------------------------------------------------------------------------------------------------------------------------------------------------------------------------------------------------------------------------------------------------------------------------------------------------------------------------------------------------------------------------------------------------------------------------------------------------------------------------------------------------------------------------------------------------------------------------------------------------------------------------------------------------------------------------------------------------------------------------------------------------------------------------------------------------------------------------------------------------------------------------------------------------------------------------------------------------------------------------------------------------------------------------------------------------------------------------------------------------------------------------------------------------------------------------------------------------------------------------------------------------------------------------------------------------------------------------------------------------------------------------------------------------------------------------------------------------------------------------------------------------------------------------------------------------------------------------------------------------------------------------------------------------------------------------------------------------------------------------------------------------------------------------------------------------------------------------------------------------------------------------------------------------------------------------------------------------------------------------------------------------------------------------------------------------------------------------------------------------------------------------------------------------------------------------------------------------------------------------------------------------------------------------------------------------------------------------------------------------------------------------------------------------------------------------------------------------------------------------------------------------------------------------------------------------------------------------------------------------------------------------------------------------------------------------------------------------------------------------------------------------------------------------------------------------------------------------------------------------------------------------------------------------------------------------------------------------------------------------------------------------------------------------------------------------------------------------------------------------------------------------------------------------------------------------------------------------------------------------------------------------------------------------------------------------------------------------------------------------------------------------------------------------------------------------------------------------------------------------------------------------------------------------------------------------------------------------------------------------------------------------------------------------------------------------------------------------------------------------------|--------|-------|------|---|-----|
| QL01975 | Perfluoro-2-hexene                                                            | 1584-00-5   | FC(=C(F)C(F)C(F)C(F)C(F)C(F)F)                                                                                                                                                                                                                                                                                                                                                                                                                                                                                                                                                                                                                                                                                                                                                                                                                                                                                                                                                                                                                                                                                                                                                                                                                                                                                                                                                                                                                                                                                                                                                                                                                                                                                                                                                                                                                                                                                                                                                                                                                                                                                                                                                                                                                                                                                                                                                                                                                                                                                                                                                                                                                                                                                                                                                                                                                                                                                                                                                                                                                                                                                                                                                                                                                                                                                                                                                                                                                                                                                                                                                                                                                                                                                                                                                                                                                                                                                                                                                                                                                                                                                                                                                                                                                                                                                                                                                                                                                                                                                                                                                                                                                                                                                                                                                                                                                                                                                                                                                                                                                                                                                                                                                                                                                                                                                                                                                                                                                                                                                                                                                                                                                                                                                                                                                                                                                                                                                                                                                                                                                                                                                                                                                                                                                                                                                                                                                                                                                                                                                                                                                                                                                                                                                                                                                                                                                                                                                                                                                                                                                                                                                                                                                                                                                                                                                                                                                                                                                                                                                                                                                                                                                                                                                                                                                                                                                                                                                                                                                                                                                                                                                                                                                                                                                                                                                                                                                                                                                                                                                                                                                                                                                                                                                                                                                                                                                                                                                                                                                                                                                                                                                                                                                                                                                                                                                                                                                                                                                                                                                                                                                                                                                                                                                                                                                                                                                                                                                                                                                                                                                                                              | -8.61  | 66.67 | 1.91 | P | IN  |
| QL01976 | Perfluoro-2-pentene                                                           | 72804-49-0  | FC(=C(F)C(F)C(F)C(F)F)                                                                                                                                                                                                                                                                                                                                                                                                                                                                                                                                                                                                                                                                                                                                                                                                                                                                                                                                                                                                                                                                                                                                                                                                                                                                                                                                                                                                                                                                                                                                                                                                                                                                                                                                                                                                                                                                                                                                                                                                                                                                                                                                                                                                                                                                                                                                                                                                                                                                                                                                                                                                                                                                                                                                                                                                                                                                                                                                                                                                                                                                                                                                                                                                                                                                                                                                                                                                                                                                                                                                                                                                                                                                                                                                                                                                                                                                                                                                                                                                                                                                                                                                                                                                                                                                                                                                                                                                                                                                                                                                                                                                                                                                                                                                                                                                                                                                                                                                                                                                                                                                                                                                                                                                                                                                                                                                                                                                                                                                                                                                                                                                                                                                                                                                                                                                                                                                                                                                                                                                                                                                                                                                                                                                                                                                                                                                                                                                                                                                                                                                                                                                                                                                                                                                                                                                                                                                                                                                                                                                                                                                                                                                                                                                                                                                                                                                                                                                                                                                                                                                                                                                                                                                                                                                                                                                                                                                                                                                                                                                                                                                                                                                                                                                                                                                                                                                                                                                                                                                                                                                                                                                                                                                                                                                                                                                                                                                                                                                                                                                                                                                                                                                                                                                                                                                                                                                                                                                                                                                                                                                                                                                                                                                                                                                                                                                                                                                                                                                                                                                                                                                      | -8.31  | 66.67 | 1.78 | P | IN  |
| QL01977 | Perfluorobut-2-ene                                                            | 360-89-4    | FC(=C(F)C(F)C(F)F)                                                                                                                                                                                                                                                                                                                                                                                                                                                                                                                                                                                                                                                                                                                                                                                                                                                                                                                                                                                                                                                                                                                                                                                                                                                                                                                                                                                                                                                                                                                                                                                                                                                                                                                                                                                                                                                                                                                                                                                                                                                                                                                                                                                                                                                                                                                                                                                                                                                                                                                                                                                                                                                                                                                                                                                                                                                                                                                                                                                                                                                                                                                                                                                                                                                                                                                                                                                                                                                                                                                                                                                                                                                                                                                                                                                                                                                                                                                                                                                                                                                                                                                                                                                                                                                                                                                                                                                                                                                                                                                                                                                                                                                                                                                                                                                                                                                                                                                                                                                                                                                                                                                                                                                                                                                                                                                                                                                                                                                                                                                                                                                                                                                                                                                                                                                                                                                                                                                                                                                                                                                                                                                                                                                                                                                                                                                                                                                                                                                                                                                                                                                                                                                                                                                                                                                                                                                                                                                                                                                                                                                                                                                                                                                                                                                                                                                                                                                                                                                                                                                                                                                                                                                                                                                                                                                                                                                                                                                                                                                                                                                                                                                                                                                                                                                                                                                                                                                                                                                                                                                                                                                                                                                                                                                                                                                                                                                                                                                                                                                                                                                                                                                                                                                                                                                                                                                                                                                                                                                                                                                                                                                                                                                                                                                                                                                                                                                                                                                                                                                                                                                                          | -7.52  | 66.67 | 1.46 | P | OUT |
| QL01978 | 2,3,3,3-Tetrafluoro-2-(heptafluoropropoxy)propyl 2-fluoroprop-2-enoate        | 96250-49-6  | FC(=C)C(=O)OCC(F)OC(F)C(F)C(F)C(F)C(F)F                                                                                                                                                                                                                                                                                                                                                                                                                                                                                                                                                                                                                                                                                                                                                                                                                                                                                                                                                                                                                                                                                                                                                                                                                                                                                                                                                                                                                                                                                                                                                                                                                                                                                                                                                                                                                                                                                                                                                                                                                                                                                                                                                                                                                                                                                                                                                                                                                                                                                                                                                                                                                                                                                                                                                                                                                                                                                                                                                                                                                                                                                                                                                                                                                                                                                                                                                                                                                                                                                                                                                                                                                                                                                                                                                                                                                                                                                                                                                                                                                                                                                                                                                                                                                                                                                                                                                                                                                                                                                                                                                                                                                                                                                                                                                                                                                                                                                                                                                                                                                                                                                                                                                                                                                                                                                                                                                                                                                                                                                                                                                                                                                                                                                                                                                                                                                                                                                                                                                                                                                                                                                                                                                                                                                                                                                                                                                                                                                                                                                                                                                                                                                                                                                                                                                                                                                                                                                                                                                                                                                                                                                                                                                                                                                                                                                                                                                                                                                                                                                                                                                                                                                                                                                                                                                                                                                                                                                                                                                                                                                                                                                                                                                                                                                                                                                                                                                                                                                                                                                                                                                                                                                                                                                                                                                                                                                                                                                                                                                                                                                                                                                                                                                                                                                                                                                                                                                                                                                                                                                                                                                                                                                                                                                                                                                                                                                                                                                                                                                                                                                                                     | -8.37  | 42.86 | 2.47 | P | IN  |
| QL01979 | Heptadecafluorodecyl 2-fluoroprop-2-enoate                                    | 96250-52-1  | FC(=C)C(=O)OCCCC(F)C(F)C(F)C(F)C(F)C(F)C(F)C(F)C(F)F                                                                                                                                                                                                                                                                                                                                                                                                                                                                                                                                                                                                                                                                                                                                                                                                                                                                                                                                                                                                                                                                                                                                                                                                                                                                                                                                                                                                                                                                                                                                                                                                                                                                                                                                                                                                                                                                                                                                                                                                                                                                                                                                                                                                                                                                                                                                                                                                                                                                                                                                                                                                                                                                                                                                                                                                                                                                                                                                                                                                                                                                                                                                                                                                                                                                                                                                                                                                                                                                                                                                                                                                                                                                                                                                                                                                                                                                                                                                                                                                                                                                                                                                                                                                                                                                                                                                                                                                                                                                                                                                                                                                                                                                                                                                                                                                                                                                                                                                                                                                                                                                                                                                                                                                                                                                                                                                                                                                                                                                                                                                                                                                                                                                                                                                                                                                                                                                                                                                                                                                                                                                                                                                                                                                                                                                                                                                                                                                                                                                                                                                                                                                                                                                                                                                                                                                                                                                                                                                                                                                                                                                                                                                                                                                                                                                                                                                                                                                                                                                                                                                                                                                                                                                                                                                                                                                                                                                                                                                                                                                                                                                                                                                                                                                                                                                                                                                                                                                                                                                                                                                                                                                                                                                                                                                                                                                                                                                                                                                                                                                                                                                                                                                                                                                                                                                                                                                                                                                                                                                                                                                                                                                                                                                                                                                                                                                                                                                                                                                                                                                                                        | -9.64  | 46.15 | 2.90 | P | IN  |
| QL01980 | 1,1,1,2,2,3,5,5,6,6,7,7,7-Tridecafluorohept-3-ene                             | 648-39-5    | FC(=CC(F)C(F)C(F)C(F)C(F)C(F)C(F)F)                                                                                                                                                                                                                                                                                                                                                                                                                                                                                                                                                                                                                                                                                                                                                                                                                                                                                                                                                                                                                                                                                                                                                                                                                                                                                                                                                                                                                                                                                                                                                                                                                                                                                                                                                                                                                                                                                                                                                                                                                                                                                                                                                                                                                                                                                                                                                                                                                                                                                                                                                                                                                                                                                                                                                                                                                                                                                                                                                                                                                                                                                                                                                                                                                                                                                                                                                                                                                                                                                                                                                                                                                                                                                                                                                                                                                                                                                                                                                                                                                                                                                                                                                                                                                                                                                                                                                                                                                                                                                                                                                                                                                                                                                                                                                                                                                                                                                                                                                                                                                                                                                                                                                                                                                                                                                                                                                                                                                                                                                                                                                                                                                                                                                                                                                                                                                                                                                                                                                                                                                                                                                                                                                                                                                                                                                                                                                                                                                                                                                                                                                                                                                                                                                                                                                                                                                                                                                                                                                                                                                                                                                                                                                                                                                                                                                                                                                                                                                                                                                                                                                                                                                                                                                                                                                                                                                                                                                                                                                                                                                                                                                                                                                                                                                                                                                                                                                                                                                                                                                                                                                                                                                                                                                                                                                                                                                                                                                                                                                                                                                                                                                                                                                                                                                                                                                                                                                                                                                                                                                                                                                                                                                                                                                                                                                                                                                                                                                                                                                                                                                                                         | -8.74  | 61.90 | 2.09 | P | IN  |
| QL01981 | 4,5,5,6,6,7,7,8,8,9,9-Dodecafluoronona-1,3-diene                              | 74338-55-9  | FC(=CC=C)C(F)C(F)C(F)C(F)C(F)C(F)C(F)F                                                                                                                                                                                                                                                                                                                                                                                                                                                                                                                                                                                                                                                                                                                                                                                                                                                                                                                                                                                                                                                                                                                                                                                                                                                                                                                                                                                                                                                                                                                                                                                                                                                                                                                                                                                                                                                                                                                                                                                                                                                                                                                                                                                                                                                                                                                                                                                                                                                                                                                                                                                                                                                                                                                                                                                                                                                                                                                                                                                                                                                                                                                                                                                                                                                                                                                                                                                                                                                                                                                                                                                                                                                                                                                                                                                                                                                                                                                                                                                                                                                                                                                                                                                                                                                                                                                                                                                                                                                                                                                                                                                                                                                                                                                                                                                                                                                                                                                                                                                                                                                                                                                                                                                                                                                                                                                                                                                                                                                                                                                                                                                                                                                                                                                                                                                                                                                                                                                                                                                                                                                                                                                                                                                                                                                                                                                                                                                                                                                                                                                                                                                                                                                                                                                                                                                                                                                                                                                                                                                                                                                                                                                                                                                                                                                                                                                                                                                                                                                                                                                                                                                                                                                                                                                                                                                                                                                                                                                                                                                                                                                                                                                                                                                                                                                                                                                                                                                                                                                                                                                                                                                                                                                                                                                                                                                                                                                                                                                                                                                                                                                                                                                                                                                                                                                                                                                                                                                                                                                                                                                                                                                                                                                                                                                                                                                                                                                                                                                                                                                                                                                      | -8.17  | 48.00 | 2.24 | P | IN  |
| QL01982 | 3,4,4,5,5,6,6,7,7,8,8,9,9,10,10,11,12,12,12-Icosafluorododec-2-enal           | 864551-40-6 | FC(=CC=O)C(F)C(F)C(F)C(F)C(F)C(F)C(F)C(F)C(F)C(F)C(F)F                                                                                                                                                                                                                                                                                                                                                                                                                                                                                                                                                                                                                                                                                                                                                                                                                                                                                                                                                                                                                                                                                                                                                                                                                                                                                                                                                                                                                                                                                                                                                                                                                                                                                                                                                                                                                                                                                                                                                                                                                                                                                                                                                                                                                                                                                                                                                                                                                                                                                                                                                                                                                                                                                                                                                                                                                                                                                                                                                                                                                                                                                                                                                                                                                                                                                                                                                                                                                                                                                                                                                                                                                                                                                                                                                                                                                                                                                                                                                                                                                                                                                                                                                                                                                                                                                                                                                                                                                                                                                                                                                                                                                                                                                                                                                                                                                                                                                                                                                                                                                                                                                                                                                                                                                                                                                                                                                                                                                                                                                                                                                                                                                                                                                                                                                                                                                                                                                                                                                                                                                                                                                                                                                                                                                                                                                                                                                                                                                                                                                                                                                                                                                                                                                                                                                                                                                                                                                                                                                                                                                                                                                                                                                                                                                                                                                                                                                                                                                                                                                                                                                                                                                                                                                                                                                                                                                                                                                                                                                                                                                                                                                                                                                                                                                                                                                                                                                                                                                                                                                                                                                                                                                                                                                                                                                                                                                                                                                                                                                                                                                                                                                                                                                                                                                                                                                                                                                                                                                                                                                                                                                                                                                                                                                                                                                                                                                                                                                                                                                                                                                                      | -9.99  | 57.14 | 2.74 | P | IN  |
| QL01983 | 3,4,4,5,5,6,6,7,7,8,8-Dodecafluorooct-2-enal                                  | 69534-12-9  | FC(=CC=O)C(F)C(F)C(F)C(F)C(F)C(F)C(F)F                                                                                                                                                                                                                                                                                                                                                                                                                                                                                                                                                                                                                                                                                                                                                                                                                                                                                                                                                                                                                                                                                                                                                                                                                                                                                                                                                                                                                                                                                                                                                                                                                                                                                                                                                                                                                                                                                                                                                                                                                                                                                                                                                                                                                                                                                                                                                                                                                                                                                                                                                                                                                                                                                                                                                                                                                                                                                                                                                                                                                                                                                                                                                                                                                                                                                                                                                                                                                                                                                                                                                                                                                                                                                                                                                                                                                                                                                                                                                                                                                                                                                                                                                                                                                                                                                                                                                                                                                                                                                                                                                                                                                                                                                                                                                                                                                                                                                                                                                                                                                                                                                                                                                                                                                                                                                                                                                                                                                                                                                                                                                                                                                                                                                                                                                                                                                                                                                                                                                                                                                                                                                                                                                                                                                                                                                                                                                                                                                                                                                                                                                                                                                                                                                                                                                                                                                                                                                                                                                                                                                                                                                                                                                                                                                                                                                                                                                                                                                                                                                                                                                                                                                                                                                                                                                                                                                                                                                                                                                                                                                                                                                                                                                                                                                                                                                                                                                                                                                                                                                                                                                                                                                                                                                                                                                                                                                                                                                                                                                                                                                                                                                                                                                                                                                                                                                                                                                                                                                                                                                                                                                                                                                                                                                                                                                                                                                                                                                                                                                                                                                                                      | -8.45  | 52.17 | 2.24 | P | IN  |
| QL01984 | 1,1,1,2,2,3,3,4,4,7,8,8,9,9,10,10,11,12,13,14,14-Pentacosafuorotetradec-6-ene | 53638-14-5  | FC(=CCC(F)C(F)C(F)C(F)C(F)C(F)C(F)C(F)C(F)C(F)C(F)C(F)C(F)F                                                                                                                                                                                                                                                                                                                                                                                                                                                                                                                                                                                                                                                                                                                                                                                                                                                                                                                                                                                                                                                                                                                                                                                                                                                                                                                                                                                                                                                                                                                                                                                                                                                                                                                                                                                                                                                                                                                                                                                                                                                                                                                                                                                                                                                                                                                                                                                                                                                                                                                                                                                                                                                                                                                                                                                                                                                                                                                                                                                                                                                                                                                                                                                                                                                                                                                                                                                                                                                                                                                                                                                                                                                                                                                                                                                                                                                                                                                                                                                                                                                                                                                                                                                                                                                                                                                                                                                                                                                                                                                                                                                                                                                                                                                                                                                                                                                                                                                                                                                                                                                                                                                                                                                                                                                                                                                                                                                                                                                                                                                                                                                                                                                                                                                                                                                                                                                                                                                                                                                                                                                                                                                                                                                                                                                                                                                                                                                                                                                                                                                                                                                                                                                                                                                                                                                                                                                                                                                                                                                                                                                                                                                                                                                                                                                                                                                                                                                                                                                                                                                                                                                                                                                                                                                                                                                                                                                                                                                                                                                                                                                                                                                                                                                                                                                                                                                                                                                                                                                                                                                                                                                                                                                                                                                                                                                                                                                                                                                                                                                                                                                                                                                                                                                                                                                                                                                                                                                                                                                                                                                                                                                                                                                                                                                                                                                                                                                                                                                                                                                                                                 | -10.63 | 59.52 | 2.94 | P | OUT |
| QL01985 | 1,1,1,2,2,3,3,4,7,7,8,8,8-Tridecafluorooct-4-ene                              | 343627-68-9 | FC(=CCC(F)C(F)C(F)C(F)C(F)C(F)F)                                                                                                                                                                                                                                                                                                                                                                                                                                                                                                                                                                                                                                                                                                                                                                                                                                                                                                                                                                                                                                                                                                                                                                                                                                                                                                                                                                                                                                                                                                                                                                                                                                                                                                                                                                                                                                                                                                                                                                                                                                                                                                                                                                                                                                                                                                                                                                                                                                                                                                                                                                                                                                                                                                                                                                                                                                                                                                                                                                                                                                                                                                                                                                                                                                                                                                                                                                                                                                                                                                                                                                                                                                                                                                                                                                                                                                                                                                                                                                                                                                                                                                                                                                                                                                                                                                                                                                                                                                                                                                                                                                                                                                                                                                                                                                                                                                                                                                                                                                                                                                                                                                                                                                                                                                                                                                                                                                                                                                                                                                                                                                                                                                                                                                                                                                                                                                                                                                                                                                                                                                                                                                                                                                                                                                                                                                                                                                                                                                                                                                                                                                                                                                                                                                                                                                                                                                                                                                                                                                                                                                                                                                                                                                                                                                                                                                                                                                                                                                                                                                                                                                                                                                                                                                                                                                                                                                                                                                                                                                                                                                                                                                                                                                                                                                                                                                                                                                                                                                                                                                                                                                                                                                                                                                                                                                                                                                                                                                                                                                                                                                                                                                                                                                                                                                                                                                                                                                                                                                                                                                                                                                                                                                                                                                                                                                                                                                                                                                                                                                                                                                                            | -8.51  | 54.17 | 2.21 | P | IN  |
| QL01986 | 2,2,3,3,4,4,4-Heptafluoro-N-(nonafluorobutyl)butanimidoyl fluoride            | 103573-07-5 | FC(=NC(F)C(F)C(F)C(F)C(F)C(F)C(F)C(F)C(F)F                                                                                                                                                                                                                                                                                                                                                                                                                                                                                                                                                                                                                                                                                                                                                                                                                                                                                                                                                                                                                                                                                                                                                                                                                                                                                                                                                                                                                                                                                                                                                                                                                                                                                                                                                                                                                                                                                                                                                                                                                                                                                                                                                                                                                                                                                                                                                                                                                                                                                                                                                                                                                                                                                                                                                                                                                                                                                                                                                                                                                                                                                                                                                                                                                                                                                                                                                                                                                                                                                                                                                                                                                                                                                                                                                                                                                                                                                                                                                                                                                                                                                                                                                                                                                                                                                                                                                                                                                                                                                                                                                                                                                                                                                                                                                                                                                                                                                                                                                                                                                                                                                                                                                                                                                                                                                                                                                                                                                                                                                                                                                                                                                                                                                                                                                                                                                                                                                                                                                                                                                                                                                                                                                                                                                                                                                                                                                                                                                                                                                                                                                                                                                                                                                                                                                                                                                                                                                                                                                                                                                                                                                                                                                                                                                                                                                                                                                                                                                                                                                                                                                                                                                                                                                                                                                                                                                                                                                                                                                                                                                                                                                                                                                                                                                                                                                                                                                                                                                                                                                                                                                                                                                                                                                                                                                                                                                                                                                                                                                                                                                                                                                                                                                                                                                                                                                                                                                                                                                                                                                                                                                                                                                                                                                                                                                                                                                                                                                                                                                                                                                                                  | -9.69  | 65.38 | 2.39 | P | IN  |
| QL01987 | Hentriacontafluorohexadecanoyl fluoride                                       | 210972-74-0 | FC(=O)C(F)C(F)C(F)C(F)C(F)C(F)C(F)C(F)C(F)C(F)C(F)C(F)C(F)C(F)C(F)C(F)C(F)C(F)C(F)C(F)C(F)C(F)C(F)C(F)C(F)C(F)C(F)C(F)C(F)C(F)C(F)C(F)C(F)C(F)C(F)C(F)C(F)C(F)C(F)C(F)C(F)C(F)C(F)C(F)C(F)C(F)C(F)C(F)C(F)C(F)C(F)C(F)C(F)C(F)C(F)C(F)C(F)C(F)C(F)C(F)C(F)C(F)C(F)C(F)C(F)C(F)C(F)C(F)C(F)C(F)C(F)C(F)C(F)C(F)C(F)C(F)C(F)C(F)C(F)C(F)C(F)C(F)C(F)C(F)C(F)C(F)C(F)C(F)C(F)C(F)C(F)C(F)C(F)C(F)C(F)C(F)C(F)C(F)C(F)C(F)C(F)C(F)C(F)C(F)C(F)C(F)C(F)C(F)C(F)C(F)C(F)C(F)C(F)C(F)C(F)C(F)C(F)C(F)C(F)C(F)C(F)C(F)C(F)C(F)C(F)C(F)C(F)C(F)C(F)C(F)C(F)C(F)C(F)C(F)C(F)C(F)C(F)C(F)C(F)C(F)C(F)C(F)C(F)C(F)C(F)C(F)C(F)C(F)C(F)C(F)C(F)C(F)C(F)C(F)C(F)C(F)C(F)C(F)C(F)C(F)C(F)C(F)C(F)C(F)C(F)C(F)C(F)C(F)C(F)C(F)C(F)C(F)C(F)C(F)C(F)C(F)C(F)C(F)C(F)C(F)C(F)C(F)C(F)C(F)C(F)C(F)C(F)C(F)C(F)C(F)C(F)C(F)C(F)C(F)C(F)C(F)C(F)C(F)C(F)C(F)C(F)C(F)C(F)C(F)C(F)C(F)C(F)C(F)C(F)C(F)C(F)C(F)C(F)C(F)C(F)C(F)C(F)C(F)C(F)C(F)C(F)C(F)C(F)C(F)C(F)C(F)C(F)C(F)C(F)C(F)C(F)C(F)C(F)C(F)C(F)C(F)C(F)C(F)C(F)C(F)C(F)C(F)C(F)C(F)C(F)C(F)C(F)C(F)C(F)C(F)C(F)C(F)C(F)C(F)C(F)C(F)C(F)C(F)C(F)C(F)C(F)C(F)C(F)C(F)C(F)C(F)C(F)C(F)C(F)C(F)C(F)C(F)C(F)C(F)C(F)C(F)C(F)C(F)C(F)C(F)C(F)C(F)C(F)C(F)C(F)C(F)C(F)C(F)C(F)C(F)C(F)C(F)C(F)C(F)C(F)C(F)C(F)C(F)C(F)C(F)C(F)C(F)C(F)C(F)C(F)C(F)C(F)C(F)C(F)C(F)C(F)C(F)C(F)C(F)C(F)C(F)C(F)C(F)C(F)C(F)C(F)C(F)C(F)C(F)C(F)C(F)C(F)C(F)C(F)C(F)C(F)C(F)C(F)C(F)C(F)C(F)C(F)C(F)C(F)C(F)C(F)C(F)C(F)C(F)C(F)C(F)C(F)C(F)C(F)C(F)C(F)C(F)C(F)C(F)C(F)C(F)C(F)C(F)C(F)C(F)C(F)C(F)C(F)C(F)C(F)C(F)C(F)C(F)C(F)C(F)C(F)C(F)C(F)C(F)C(F)C(F)C(F)C(F)C(F)C(F)C(F)C(F)C(F)C(F)C(F)C(F)C(F)C(F)C(F)C(F)C(F)C(F)C(F)C(F)C(F)C(F)C(F)C(F)C(F)C(F)C(F)C(F)C(F)C(F)C(F)C(F)C(F)C(F)C(F)C(F)C(F)C(F)C(F)C(F)C(F)C(F)C(F)C(F)C(F)C(F)C(F)C(F)C(F)C(F)C(F)C(F)C(F)C(F)C(F)C(F)C(F)C(F)C(F)C(F)C(F)C(F)C(F)C(F)C(F)C(F)C(F)C(F)C(F)C(F)C(F)C(F)C(F)C(F)C(F)C(F)C(F)C(F)C(F)C(F)C(F)C(F)C(F)C(F)C(F)C(F)C(F)C(F)C(F)C(F)C(F)C(F)C(F)C(F)C(F)C(F)C(F)C(F)C(F)C(F)C(F)C(F)C(F)C(F)C(F)C(F)C(F)C(F)C(F)C(F)C(F)C(F)C(F)C(F)C(F)C(F)C(F)C(F)C(F)C(F)C(F)C(F)C(F)C(F)C(F)C(F)C(F)C(F)C(F)C(F)C(F)C(F)C(F)C(F)C(F)C(F)C(F)C(F)C(F)C(F)C(F)C(F)C(F)C(F)C(F)C(F)C(F)C(F)C(F)C(F)C(F)C(F)C(F)C(F)C(F)C(F)C(F)C(F)C(F)C(F)C(F)C(F)C(F)C(F)C(F)C(F)C(F)C(F)C(F)C(F)C(F)C(F)C(F)C(F)C(F)C(F)C(F)C(F)C(F)C(F)C(F)C(F)C(F)C(F)C(F)C(F)C(F)C(F)C(F)C(F)C(F)C(F)C(F)C(F)C(F)C(F)C(F)C(F)C(F)C(F)C(F)C(F)C(F)C(F)C(F)C(F)C(F)C(F)C(F)C(F)C(F)C(F)C(F)C(F)C(F)C(F)C(F)C(F)C(F)C(F)C(F)C(F)C(F)C(F)C(F)C(F)C(F)C(F)C(F)C(F)C(F)C(F)C(F)C(F)C(F)C(F)C(F)C(F)C(F)C(F)C(F)C(F)C(F)C(F)C(F)C(F)C(F)C(F)C(F)C(F)C(F)C(F)C(F)C(F)C(F)C(F)C(F)C(F)C(F)C(F)C(F)C(F)C(F)C(F)C(F)C(F)C(F)C(F)C(F)C(F)C(F)C(F)C(F)C(F)C(F)C(F)C(F)C(F)C(F)C(F)C(F)C(F)C(F)C(F)C(F)C(F)C(F)C(F)C(F)C(F)C(F)C(F)C(F)C(F)C(F)C(F)C(F)C(F)C(F)C(F)C(F)C(F)C(F)C(F)C(F)C(F)C(F)C(F)C(F)C(F)C(F)C(F)C(F)C(F)C(F)C(F)C(F)C(F)C(F)C(F)C(F)C(F)C(F)C(F)C(F)C(F)C(F)C(F)C(F)C(F)C(F)C(F)C(F)C(F)C(F)C(F)C(F)C(F)C(F)C(F)C(F)C(F)C(F)C(F)C(F)C(F)C(F)C(F)C(F)C(F)C(F)C(F)C(F)C(F)C(F)C(F)C(F)C(F)C(F)C(F)C(F)C(F)C(F)C(F)C(F)C(F)C(F)C(F)C(F)C(F)C(F)C(F)C(F)C(F)C(F)C(F)C(F)C(F)C(F)C(F)C(F)C(F)C(F)C(F)C(F)C(F)C(F)C(F)C(F)C(F)C(F)C(F)C(F)C(F)C(F)C(F)C(F)C(F)C(F)C(F)C(F)C(F)C(F)C(F)C(F)C(F)C(F)C(F)C(F)C(F)C(F)C(F)C(F)C(F)C(F)C(F)C(F)C(F)C(F)C(F)C(F)C(F)C(F)C(F)C(F)C(F)C(F)C(F)C(F)C(F)C(F)C(F)C(F)C(F)C(F)C(F)C(F)C(F)C(F)C(F)C(F)C(F)C(F)C(F)C(F)C(F)C(F)C(F)C(F)C(F)C(F)C(F)C(F)C(F)C(F)C(F)C(F)C(F)C(F)C(F)C(F)C(F)C(F)C(F)C(F)C(F)C(F)C(F)C(F)C(F)C(F)C(F)C(F)C(F)C(F)C(F)C(F)C(F)C(F)C(F)C(F)C(F)C(F)C(F)C(F)C(F)C(F)C(F)C(F)C(F)C(F)C(F)C(F)C(F)C(F)C(F)C(F)C(F)C(F)C(F)C(F)C(F)C(F)C(F)C(F)C(F)C(F)C(F)C(F)C(F)C(F)C(F)C(F)C(F)C(F)C(F)C(F)C(F)C(F)C(F)C(F)C(F)C(F)C(F)C(F)C(F)C(F)C(F)C(F)C(F)C(F)C(F)C(F)C(F)C(F)C(F)C(F)C(F)C(F)C(F)C(F)C(F)C(F)C(F)C(F)C(F)C(F)C(F)C(F)C(F)C(F)C(F)C(F)C(F)C(F)C(F)C(F)C(F)C(F)C(F)C(F)C(F)C(F)C(F)C(F)C(F)C(F)C(F)C(F)C(F)C(F)C(F)C(F)C(F)C(F)C(F)C(F)C(F)C(F)C(F)C(F)C(F)C(F)C(F)C(F)C(F)C(F)C(F)C(F)C(F)C(F)C(F)C(F)C(F)C(F)C(F)C(F)C(F)C(F)C(F)C(F)C(F)C(F)C(F)C(F)C(F)C(F)C(F)C(F)C(F)C(F)C(F)C(F)C(F)C(F)C(F)C(F)C(F)C(F)C(F)C(F)C(F)C(F)C(F)C(F)C(F)C(F)C(F)C(F)C(F)C(F)C(F)C(F)C(F)C(F)C(F)C(F)C(F)C(F)C(F)C(F)C(F)C(F)C(F)C(F)C(F)C(F)C(F)C(F)C(F)C(F)C(F)C(F)C(F)C(F)C(F)C(F)C(F)C(F)C(F)C(F)C(F)C(F)C(F)C(F)C(F)C(F)C(F)C(F)C(F)C(F)C(F)C(F)C(F)C(F)C(F)C(F)C(F)C(F)C(F)C(F)C(F)C(F)C(F)C(F)C(F)C(F)C(F)C(F)C(F)C(F)C(F)C(F)C(F)C(F)C(F)C(F)C(F)C(F)C(F)C(F)C(F)C(F)C(F)C(F)C(F)C(F)C(F)C(F)C(F)C(F)C(F)C(F)C(F)C(F)C(F)C(F)C(F)C(F)C(F)C(F)C(F)C(F)C(F)C(F)C(F)C(F)C(F)C(F)C(F)C(F)C(F)C(F)C(F)C(F)C(F)C(F)C(F)C(F)C(F)C(F)C(F)C(F)C(F)C(F)C(F)C(F)C(F)C(F)C(F)C(F)C(F)C(F)C(F)C(F)C(F)C(F)C(F)C(F)C(F)C(F)C(F)C(F)C(F)C(F)C(F)C(F)C(F)C(F)C(F)C(F)C(F)C(F)C(F)C(F)C(F)C(F)C(F)C(F)C(F)C(F)C(F)C(F)C(F)C(F)C(F)C(F)C(F)C(F)C(F)C(F)C(F)C(F)C(F)C(F)C(F)C(F)C(F)C(F)C(F)C(F)C(F)C(F)C(F)C(F)C(F)C(F)C(F)C(F)C(F)C(F)C(F)C(F)C(F)C(F)C(F)C(F)C(F)C(F)C(F)C(F)C(F)C(F)C(F)C(F)C(F)C(F)C(F)C(F)C(F)C(F)C(F)C(F)C(F)C(F)C(F)C(F)C(F)C(F)C(F)C(F)C(F)C(F)C(F)C(F)C(F)C(F)C(F)C(F)C(F)C(F)C(F)C(F)C(F)C(F)C(F)C(F)C(F)C(F)C(F)C(F)C(F)C(F)C(F)C(F)C(F)C(F)C(F)C(F)C(F)C(F)C(F)C(F)C(F)C(F)C(F)C(F)C(F)C(F)C(F)C(F)C(F)C(F)C(F)C(F)C(F)C(F)C(F)C(F)C(F)C(F)C(F)C(F)C(F)C(F)C(F)C(F)C(F)C(F)C(F)C(F)C(F)C(F)C(F)C(F)C(F)C(F)C(F)C(F)C(F)C(F)C(F)C(F)C(F)C(F)C(F)C(F)C(F)C(F)C(F)C(F)C(F)C(F)C(F)C(F)C(F)C(F)C(F)C(F)C(F)C(F)C(F)C(F)C(F)C(F)C(F)C(F)C(F)C(F)C(F)C(F)C(F)C(F)C(F)C(F)C(F)C(F)C(F)C(F)C(F)C(F)C(F)C(F)C(F)C(F)C(F)C(F)C(F)C(F)C(F)C(F)C(F)C(F)C(F)C(F)C(F)C(F)C(F)C(F)C(F)C(F)C(F)C(F)C(F)C(F)C(F)C(F)C(F)C(F)C(F)C(F)C(F)C(F)C(F)C(F)C(F)C(F)C(F)C(F)C(F)C(F)C(F)C(F)C(F)C(F)C(F)C(F)C(F)C(F)C(F)C(F)C(F)C(F)C(F)C(F)C(F)C(F)C(F)C(F)C(F)C(F)C(F)C(F)C(F)C(F)C(F)C(F)C(F)C(F)C(F)C(F)C(F)C(F)C(F)C(F)C(F)C(F)C(F)C(F)C(F)C(F)C(F)C(F)C(F)C(F)C(F)C(F)C(F)C(F)C(F)C(F)C(F)C(F)C(F)C(F)C(F)C(F)C(F)C(F)C(F)C(F)C(F)C(F)C(F)C(F)C(F)C(F)C(F)C(F)C(F)C(F)C(F)C(F)C(F)C(F)C(F)C(F)C(F)C(F)C(F)C(F)C(F)C(F)C(F)C(F)C(F)C(F)C(F)C(F)C(F)C(F)C(F)C(F)C(F)C(F)C(F)C(F)C(F)C(F)C(F)C(F)C(F)C(F)C(F)C(F)C(F)C(F)C(F)C(F)C(F)C(F)C(F)C(F)C(F)C(F)C(F)C(F)C(F)C(F)C(F)C(F)C(F)C(F)C(F)C(F)C(F)C(F)C(F)C(F)C(F)C(F)C(F)C(F)C(F)C(F)C(F)C(F)C(F)C(F)C(F)C(F)C(F)C(F)C(F)C(F)C(F)C(F)C(F)C(F)C(F)C(F)C(F)C(F)C(F)C(F)C(F)C(F)C(F)C(F)C(F)C(F)C(F)C(F)C(F)C(F)C(F)C(F)C(F)C(F)C(F)C(F)C(F)C(F)C(F)C(F)C(F)C(F)C(F)C(F)C(F)C(F)C(F)C(F)C(F)C(F)C(F)C(F)C(F)C(F)C(F)C(F)C(F)C(F)C(F)C(F)C(F)C(F)C(F)C(F)C(F)C(F)C(F)C(F)C(F)C(F)C(F)C(F)C(F)C(F)C(F)C(F)C(F)C(F)C(F)C(F)C(F)C(F)C(F)C(F)C(F)C(F)C(F)C(F)C(F)C(F)C(F)C(F)C(F)C(F)C(F)C(F)C(F)C(F)C(F)C(F)C(F)C(F)C(F)C(F)C(F)C(F)C(F)C(F)C(F)C(F)C(F)C(F)C(F)C(F)C(F)C(F)C(F)C(F)C(F)C(F)C(F)C(F)C(F)C(F)C(F)C(F)C(F)C(F)C(F)C(F)C(F)C(F)C(F)C(F)C(F)C(F)C(F)C(F)C(F)C(F)C(F)C(F)C(F)C(F)C(F)C(F)C(F)C(F)C(F)C(F)C(F)C(F)C(F)C(F)C(F)C(F)C(F)C(F)C(F)C(F)C(F)C(F)C(F)C(F)C(F)C(F)C(F)C(F)C(F)C(F)C(F)C(F)C(F)C(F)C(F)C(F)C(F)C(F)C(F)C(F)C(F)C(F)C(F)C(F)C(F)C(F)C(F)C(F)C(F)C(F)C(F)C(F)C(F)C(F)C(F)C(F)C(F)C(F)C(F)C(F)C(F)C(F)C(F)C(F)C(F)C(F)C(F)C(F)C(F)C(F)C(F)C(F)C(F)C(F)C(F)C(F)C(F)C(F)C(F)C(F)C(F)C(F)C(F)C(F)C(F)C(F)C(F)C(F)C(F)C(F)C(F)C(F)C(F)C(F)C(F)C(F)C(F)C(F)C(F)C(F)C(F)C(F)C(F)C(F)C(F)C(F)C(F)C(F)C(F)C(F)C(F)C(F)C(F)C(F)C(F)C(F)C(F)C(F)C(F)C(F)C(F)C(F)C(F)C(F)C(F)C(F)C(F)C(F)C(F)C(F)C(F)C(F)C(F)C(F)C(F)C(F)C(F)C(F)C(F)C(F)C(F)C(F)C(F)C(F)C(F)C(F)C(F)C(F)C(F)C(F)C(F)C(F)C(F)C(F)C(F)C(F)C(F)C(F)C(F)C(F)C(F)C(F)C(F)C(F)C(F)C(F)C(F)C(F)C(F)C(F)C(F)C(F)C(F)C(F)C(F)C(F)C(F)C(F)C(F)C(F)C(F)C(F)C(F)C(F)C(F)C(F)C(F)C(F)C(F)C(F)C(F)C(F)C(F)C(F)C(F)C(F)C(F)C(F)C(F)C(F)C(F)C(F)C(F)C(F)C(F)C(F)C(F)C(F)C(F)C(F)C(F)C(F)C(F)C(F)C(F)C(F)C(F)C(F)C(F)C(F)C(F)C(F)C(F)C(F)C(F)C(F)C(F)C(F)C(F)C(F)C(F)C(F)C(F)C(F)C(F)C(F)C(F)C(F)C(F)C(F)C(F)C(F)C(F)C(F)C(F)C(F)C(F)C(F)C(F)C(F)C(F)C(F)C(F)C(F)C(F)C(F)C(F)C(F)C(F)C(F)C(F)C(F)C(F)C(F)C(F)C(F)C(F)C(F)C(F)C(F)C(F)C(F)C(F)C(F)C(F)C(F)C(F)C(F)C(F)C(F)C(F)C(F)C(F)C(F)C(F)C(F)C(F)C(F)C(F)C(F)C(F)C(F)C(F)C(F)C(F)C(F)C(F)C(F)C(F)C(F)C(F)C(F)C(F)C(F)C(F)C(F)C(F)C(F)C(F)C(F)C(F)C(F)C(F)C(F)C(F)C(F)C(F)C(F)C(F)C(F)C(F)C(F)C(F)C(F)C(F)C(F)C(F)C(F)C(F)C(F)C(F)C(F)C(F)C(F)C(F)C(F)C(F)C(F)C(F)C(F)C(F)C(F)C(F)C(F)C(F)C(F)C(F)C(F)C(F)C(F)C(F)C(F)C(F)C(F)C(F)C(F)C(F)C(F)C(F)C(F)C(F)C(F)C(F)C(F)C(F)C(F)C(F)C(F)C(F)C(F)C(F)C(F)C(F)C(F)C(F)C(F)C(F)C(F)C(F)C(F)C(F)C(F)C(F)C(F)C(F)C(F)C(F)C(F)C(F)C(F)C(F)C(F)C(F)C(F)C(F)C(F)C(F)C(F)C(F)C(F)C(F)C(F)C(F)C(F)C(F)C(F)C(F)C(F)C(F)C(F)C(F)C(F)C(F)C(F)C(F)C(F)C(F)C(F)C(F)C(F)C(F)C(F)C(F)C(F)C(F)C(F)C(F)C(F)C(F)C(F)C(F)C(F)C(F)C(F)C(F)C(F)C(F)C(F)C(F)C(F)C(F)C(F)C(F)C(F)C(F)C(F)C(F)C(F)C(F)C(F)C(F)C(F)C(F)C(F)C(F)C(F)C(F)C(F)C(F)C(F)C(F)C(F)C(F)C(F)C(F)C(F)C(F)C(F)C(F)C(F)C(F)C(F)C(F)C(F)C(F)C(F)C(F)C(F)C(F)C(F)C(F)C(F)C(F)C(F)C(F)C(F)C(F)C(F)C(F)C(F)C(F)C(F)C(F)C(F)C(F)C(F)C(F)C(F)C(F)C(F)C(F)C(F)C(F)C(F)C(F)C(F)C(F)C(F)C(F)C(F)C(F)C(F)C(F)C(F)C(F)C(F)C(F)C(F)C(F)C(F)C(F)C(F)C(F)C(F)C(F)C(F)C(F)C(F)C(F)C(F)C(F)C(F)C(F)C(F)C(F)C(F)C(F)C(F)C(F)C(F)C(F)C(F)C(F)C(F)C(F)C(F)C(F)C(F)C(F)C(F)C(F)C(F)C(F)C(F)C(F)C(F)C(F)C(F)C(F)C(F)C(F)C(F)C(F)C(F)C(F)C(F)C(F)C(F)C(F)C(F)C(F)C(F)C(F)C(F)C(F)C(F)C(F)C(F)C(F)C(F)C(F)C(F)C(F)C(F)C(F)C(F)C(F)C(F)C(F)C(F)C(F)C(F)C(F)C(F)C(F)C(F)C(F)C(F)C(F)C(F)C(F)C(F)C(F)C(F)C(F)C(F)C(F)C(F)C(F)C(F)C(F)C(F)C(F)C(F)C(F)C(F)C(F)C(F)C(F)C(F)C(F)C(F)C(F)C(F)C(F)C(F)C(F)C(F)C(F)C(F)C(F)C(F)C(F)C(F)C(F)C(F)C(F)C(F)C(F)C(F)C(F)C(F)C(F)C(F)C(F)C(F)C(F)C(F)C(F)C(F)C(F)C(F)C(F)C(F)C(F)C(F)C(F)C(F)C(F)C(F)C(F)C(F)C(F)C(F)C(F)C(F)C(F)C(F)C(F)C(F)C(F)C(F)C(F)C(F)C(F)C(F)C(F)C(F)C(F)C(F)C(F)C(F)C(F)C(F)C(F)C(F)C(F)C(F)C(F)C(F)C(F)C(F)C(F)C(F)C(F)C(F)C(F)C(F)C(F)C(F)C(F)C(F)C(F)C(F)C(F)C(F)C(F)C(F)C(F)C(F)C(F)C(F)C(F)C(F)C(F)C(F)C(F)C(F)C(F)C(F)C(F)C(F)C(F)C(F)C(F)C(F)C(F)C(F)C(F)C(F)C(F)C(F)C(F)C(F)C(F)C(F)C(F)C(F)C(F)C(F)C(F)C(F)C(F)C(F)C(F)C(F)C(F)C(F)C(F)C(F)C(F)C(F)C(F)C(F)C(F)C(F)C(F)C(F)C(F)C(F)C(F)C(F)C(F)C(F)C(F)C(F)C(F)C(F)C(F)C(F)C(F)C(F)C(F)C(F)C(F)C(F)C(F)C(F)C(F)C(F)C(F)C(F)C |        |       |      |   |     |



[illegible]



[illegible]



[illegible]



|         |                                                                                                      |              |                                                                               |        |       |      |   |     |
|---------|------------------------------------------------------------------------------------------------------|--------------|-------------------------------------------------------------------------------|--------|-------|------|---|-----|
| QL02160 | H-substituted perfluoroalkyl (linear) sulfonic acids, n=2                                            |              | FC(F)(F)C([H])(F)C(F)(F)C(F)S(=O)(O)=O                                        | -6.87  | 44.44 | 1.81 | P | IN  |
| QL02161 | H-substituted perfluoroalkyl (linear) sulfonic acids, n=1                                            |              | FC(F)(F)C([H])(F)C(F)(F)S(=O)(O)=O                                            | -5.73  | 40.00 | 1.46 | P | IN  |
| QL02162 | Perfluoro-3-ethyl-2,4-dimethyl-2-pentene                                                             | 30320-26-4   | FC(F)(F)C(=C(C(F)(F)C(F)C(F)C(F)C(F)C(F)F)C(F)F)F                             | -7.67  | 66.67 | 1.52 | P | OUT |
| QL02163 | 1,1-Bis(trifluoromethyl)ethene                                                                       | 382-10-5     | FC(F)(F)C(=C(C(F)F)F)F                                                        | -6.01  | 50.00 | 1.30 | P | IN  |
| QL02164 | 5-Fluoro-5,7,7-tris(trifluoromethyl)-6-(2,2,2-trifluoro-1-(trifluoromethyl)ethylidene)-1,4-dioxepane | 94333-56-9   | FC(F)(F)C(=C1C(F)(O)CCOC1C(F)(F)C(F)(F)C(F)(F)C(F)F)F                         | -6.33  | 48.48 | 1.47 | P | IN  |
| QL02165 | 3-Trifluoromethylperfluoro-2-pentanone                                                               | 93830-92-3   | FC(F)(F)C(=O)C(F)(C(F)(F)C(F)C(F)C(F)F)F                                      | -7.99  | 63.16 | 1.75 | P | IN  |
| QL02166 | 1,1,1,3,4,4,4-Heptafluoro-3-(trifluoromethyl)butan-2-one                                             | 756-12-7     | FC(F)(F)C(=O)C(F)(C(F)(F)C(F)F)F                                              | -7.02  | 62.50 | 1.37 | P | IN  |
| QL02167 | 1,1,1,3,3,4,5,5,5-Nonafluoro-4-(trifluoromethyl)pentan-2-one                                         | 73041-05-1   | FC(F)(F)C(=O)C(F)(F)C(F)(C(F)(F)C(F)F)F                                       | -7.91  | 63.16 | 1.71 | P | IN  |
| QL02168 | ketone perfluoroalkyl (linear) carboxylic acids, n=8                                                 |              | FC(F)(F)C(=O)C(F)(F)C(F)(F)C(F)(F)C(F)(F)C(F)(F)C(F)S(=O)(O)=O                | -9.67  | 54.29 | 2.69 | P | IN  |
| QL02169 | ketone perfluoroalkyl (linear) carboxylic acids, n=7                                                 |              | FC(F)(F)C(=O)C(F)(F)C(F)(F)C(F)(F)C(F)(F)C(F)(F)C(F)S(=O)(O)=O                | -9.17  | 53.13 | 2.51 | P | IN  |
| QL02170 | ketone perfluoroalkyl (linear) carboxylic acids, n=5                                                 |              | FC(F)(F)C(=O)C(F)(F)C(F)(F)C(F)(F)C(F)(F)C(F)S(=O)(O)=O                       | -8.29  | 50.00 | 2.24 | P | IN  |
| QL02171 | ketone perfluoroalkyl (linear) carboxylic acids, n=4                                                 |              | FC(F)(F)C(=O)C(F)(F)C(F)(F)C(F)(F)C(F)S(=O)(O)=O                              | -7.95  | 47.83 | 2.16 | P | IN  |
| QL02172 | ketone perfluoroalkyl (linear) carboxylic acids, n=3                                                 |              | FC(F)(F)C(=O)C(F)(F)C(F)(F)C(F)S(=O)(O)=O                                     | -7.13  | 45.00 | 1.90 | P | IN  |
| QL02173 | 2,2,2-Trifluoro-1-[4-(tridecafluorohexyl)phenyl]ethan-1-one                                          | 171183-94-1  | FC(F)(F)C(=O)c1ccc(cc1)C(F)(F)C(F)(F)C(F)(F)C(F)(F)C(F)F                      | -9.25  | 45.71 | 2.75 | P | IN  |
| QL02174 | 1,1,1,5,5,6,6,7,7,8,8,9,9,10,10,10-hexadecafluorodecane-2,4-dione                                    | 147874-76-8  | FC(F)(F)C(=O)CC(=O)C(F)(F)C(F)C(F)(F)C(F)(F)C(F)(F)C(F)F                      | -9.19  | 53.33 | 2.51 | P | IN  |
| QL02175 | 1,1,1,5,5,6,6,7,7,8,8,8-dodecafluorooctane-2,4-dione                                                 | 261503-40-6  | FC(F)(F)C(=O)CC(=O)C(F)(F)C(F)C(F)(F)C(F)(F)F                                 | -8.31  | 50.00 | 2.24 | P | IN  |
| QL02176 | 3H,3H-Perfluoroheptane-2,4-dione                                                                     | 20583-66-8   | FC(F)(F)C(=O)CC(=O)C(F)(F)C(F)C(F)(F)C(F)F                                    | -7.92  | 47.62 | 2.15 | P | IN  |
| QL02177 | 3H,3H-Perfluoro-2,4-hexanedione                                                                      | 20825-07-4   | FC(F)(F)C(=O)CC(=O)C(F)(F)C(F)F                                               | -7.06  | 44.44 | 1.88 | P | IN  |
| QL02178 | 3-(Perfluorohexyl)-1-(trifluoroacetyl)-5-(trifluoromethyl)-1H-pyrazole                               | 261778-38-5  | FC(F)(F)C(=O)N1N=C(C=C1C(F)(F)C(F)(F)C(F)C(F)(F)C(F)(F)C(F)F)F                | -9.62  | 54.29 | 2.67 | P | IN  |
| QL02179 | 2,2,3,3,4,4,4-Heptafluorobutyl trifluoroacetate                                                      | 1365808-09-8 | FC(F)(F)C(=O)OCC(F)(F)C(F)(F)C(F)F                                            | -7.98  | 50.00 | 2.11 | P | IN  |
| QL02180 | 2,2,3,3,4,4,4-Heptafluoro-N-[(trifluoroacetyl)oxy]butanamide                                         | 88326-80-1   | FC(F)(F)C(=O)ONC(=O)C(F)(F)C(F)(F)C(F)F                                       | -8.11  | 47.62 | 2.23 | P | IN  |
| QL02181 | 1,1,1,3,3,5,5-Octafluoro-2,2,4,4-tetrakis(trifluoromethyl)pentane                                    | 62375-54-6   | FC(F)(F)C(C(F)(F)F)C(F)(F)C(F)C(C(F)(F)F)C(F)(F)C(F)(F)F                      | -7.68  | 68.97 | 1.46 | P | OUT |
| QL02182 | Perfluoro-2,2,5,5-tetramethylhexane                                                                  | 71076-47-6   | FC(F)(F)C(C(F)(F)F)C(F)(F)C(F)(F)C(C(F)(F)C(F)(F)C(F)F)C(F)F                  | -8.06  | 68.75 | 1.62 | P | OUT |
| QL02183 | 2,2-bis(Trifluoromethyl)perfluoropropane                                                             | 374-51-6     | FC(F)(F)C(C(F)(F)F)C(F)(F)C(F)F                                               | -6.88  | 70.59 | 1.09 | P | OUT |
| QL02184 | Perfluoro tert-butylcyclohexane                                                                      | 84808-64-0   | FC(F)(F)C(C(F)(F)F)C(F)(F)C1(F)C(F)C(F)(F)C(F)(F)C1F                          | -8.55  | 66.67 | 1.88 | P | IN  |
| QL02185 | Perfluorodecahydro-1-t-butyl-naphthalene                                                             | 118914-94-6  | FC(F)(F)C(C(F)(F)F)C(F)(F)C1(F)C(F)(F)C(F)C(F)C2(F)C(F)C(F)(F)C(F)C12F        | -8.74  | 65.00 | 2.01 | P | IN  |
| QL02186 | Perfluorodecahydro-2-t-butyl-naphthalene                                                             | 119107-97-0  | FC(F)(F)C(C(F)(F)F)C(F)(F)C1(F)C(F)C(F)(F)C2(F)C(F)C(F)(F)C(F)(F)C(F)C2(F)C1F | -9.27  | 65.00 | 2.23 | P | IN  |
| QL02187 | 2H-Perfluoro(2-methyl)pentane                                                                        | 30320-28-6   | FC(F)(F)C(C(F)(F)C(F)(F)C(F)F)F                                               | -8.03  | 65.00 | 1.71 | P | IN  |
| QL02188 | (1,1,1,5,5,6,6,7,7,7-Decafluorohept-3-yn-2-ylidene)cyclopentane                                      | 139226-05-4  | FC(F)(F)C(C#CC(F)(F)C(F)(F)C(F)F)=C1CCCC1                                     | -6.91  | 33.33 | 2.13 | P | IN  |
| QL02189 | Hexafluoro-2,2,3,3-tetrachlorobutane                                                                 | 375-34-8     | FC(F)(F)C(Cl)(Cl)C(Cl)C(F)F                                                   | -7.82  | 71.43 | 1.45 | P | OUT |
| QL02190 | 1,2-Dibromohexafluoropropane                                                                         | 661-95-0     | FC(F)(F)C(F)(Br)C(F)FBr                                                       | -7.60  | 72.73 | 1.32 | P | OUT |
| QL02191 | Bis(perfluoroisopropyl)ketone                                                                        | 813-44-5     | FC(F)(F)C(F)C(=O)C(F)(C(F)(F)C(F)F)C(F)(F)C(F)F                               | -7.62  | 63.64 | 1.58 | P | IN  |
| QL02192 | 1,1,1,2,4,4,5,5-Octafluoro-5-iodo-2-(trifluoromethyl)pentan-3-one                                    | 93822-96-9   | FC(F)(F)C(F)C(F)C(=O)C(F)(F)C(F)(F)C(F)F                                      | -7.82  | 63.16 | 1.68 | P | IN  |
| QL02193 | 1-Propanone, 2,3,3,3-tetrafluoro-1-phenyl-2-(trifluoromethyl)-                                       | 56112-35-7   | FC(F)(F)C(F)(C(=O)C1=CC=CC=C1)C(F)F                                           | -6.10  | 30.43 | 1.88 | P | IN  |
| QL02194 | 1-(4-Chlorophenyl)-2,3,3,3-tetrafluoro-2-(trifluoromethyl)propan-1-one                               | 56041-73-7   | FC(F)(F)C(F)C(F)C(=O)c1ccc(Cl)cc1)C(F)F                                       | -6.99  | 34.78 | 2.12 | P | IN  |
| QL02195 | Benzyl 2,3,3,3-tetrafluoro-2-(trifluoromethyl)propanoate                                             | 38392-11-9   | FC(F)(F)C(F)C(F)C(=O)OCC1C(CCC1)C(F)F                                         | -6.48  | 25.93 | 2.16 | P | OUT |
| QL02196 | Bis[2,3,3,3-tetrafluoro-1-oxo-2-(trifluoromethyl)propyl]peroxide                                     | 111632-55-4  | FC(F)(F)C(F)C(F)C(=O)OOC(=O)C(F)(F)C(F)(F)C(F)(F)C(F)F                        | -7.95  | 53.85 | 1.99 | P | IN  |
| QL02197 | 2-bromo-3,4,4,4-tetrafluoro-3-(trifluoromethyl)but-1-ene                                             | 234443-24-4  | FC(F)(F)C(F)C(F)(C(Br)=C)C(F)F                                                | -6.09  | 53.33 | 1.24 | P | IN  |
| QL02198 | Perfluoro-2,3-dimethylbutane                                                                         | 354-96-1     | FC(F)(F)C(F)C(F)(C(F)(F)F)C(F)(C(F)(F)F)F                                     | -7.35  | 70.00 | 1.30 | P | OUT |
| QL02199 | Heptane, 1,1,1,2,3,3,4,5,5,6,7,7,7-tridecafluoro-2,4,6-tris(trifluoromethyl)-                        | 84808-63-9   | FC(F)(F)C(F)C(F)C(F)(F)C(F)(F)C(F)(F)C(F)(F)C(F)(F)C(F)(F)F                   | -9.05  | 68.75 | 2.03 | P | OUT |
| QL02200 | Perfluoro-2,7-dimethyloctane                                                                         | 3021-63-4    | FC(F)(F)C(F)C(F)C(F)F)C(F)(F)C(F)(F)C(F)(F)C(F)(F)C(F)F                       | -9.32  | 68.75 | 2.14 | P | OUT |
| QL02201 | Perfluoro-2,9-dimethyldodecane                                                                       | 103188-55-2  | FC(F)(F)C(F)C(F)C(F)F)C(F)(F)C(F)(F)C(F)(F)C(F)(F)C(F)(F)C(F)F                | -10.00 | 68.42 | 2.43 | P | IN  |
| QL02202 | 1,1,1,2,3,3,4,4,5,5,6,6,7,7,8,8,9,9,10,10,11,12,12-tetracosafuoro-2,11-bis(trifluoromethyl)dodecane  | 118694-32-9  | FC(F)(F)C(F)C(F)C(F)F)C(F)(F)C(F)(F)C(F)(F)C(F)(F)C(F)(F)C(F)F                | -10.58 | 68.18 | 2.67 | P | OUT |
| QL02203 | 1,1,1,2,3,3,4,4,5,5,6,6,7,7,8,8,9,9,10,10-icosafuoro-12-iodo-2-(trifluoromethyl)dodecane             | 242142-80-9  | FC(F)(F)C(F)C(F)C(F)F)C(F)(F)C(F)(F)C(F)(F)C(F)(F)C(F)(F)C(F)CCI              | -10.07 | 58.54 | 2.73 | P | OUT |
| QL02204 | 2-(Perfluoro-7-methyloctyl)ethyl iodide                                                              | 40678-31-7   | FC(F)(F)C(F)C(F)C(F)F)C(F)(F)C(F)(F)C(F)(F)C(F)(F)C(F)CCI                     | -9.40  | 57.14 | 2.50 | P | IN  |
| QL02205 | 2-[2,2,3,3,4,4,5,5,6,7,7-dodecafluoro-6-(trifluoromethyl)heptyl]oxirane                              | 24564-77-0   | FC(F)(F)C(F)C(F)(C(F)(F)F)C(F)(F)C(F)(F)C(F)F)CC1CO1                          | -8.09  | 48.39 | 2.20 | P | IN  |
| QL02206 | 1,1,1,2,3,3,4,4,5,5,6,6-dodecafluoro-8-iodo-2-(trifluoromethyl)octane                                | 18017-20-4   | FC(F)(F)C(F)C(F)(C(F)(F)F)C(F)(F)C(F)(F)C(F)(F)C(F)CCI                        | -8.59  | 55.17 | 2.22 | P | IN  |
| QL02207 | 3,3,4,4,5,5,6,6,7,8,8,8-Dodecafluoro-7-(trifluoromethyl)octyl prop-2-enoate                          | 50836-65-2   | FC(F)(F)C(F)C(F)C(F)F)C(F)(F)C(F)(F)C(F)(F)C(F)COC(=O)C=C                     | -8.80  | 41.67 | 2.68 | P | IN  |
| QL02208 | Perfluoroisooheptyl iodide                                                                           | 3486-08-6    | FC(F)(F)C(F)C(F)F)C(F)(F)C(F)(F)C(F)(F)C(F)F)I                                | -8.66  | 69.57 | 1.85 | P | OUT |
| QL02209 | 3,3,4,4,5,6,6-Octafluoro-5-(trifluoromethyl)hex-1-ene                                                | 139060-76-7  | FC(F)(F)C(F)C(F)C(F)F)C(F)(F)C(F)(F)C=C                                       | -7.32  | 52.38 | 1.77 | P | IN  |



[illegible]



[illegible]



|         |                                                                                                                                 |             |                                                                                     |       |       |      |   |     |
|---------|---------------------------------------------------------------------------------------------------------------------------------|-------------|-------------------------------------------------------------------------------------|-------|-------|------|---|-----|
| QL02303 | N,N-Dicyclohexyl-2,2,3,3,4,4,4-heptafluorobutanamide                                                                            | 386-84-5    | FC(F)(F)C(F)(F)C(F)(F)C(=O)N(C1CCCCC1)C1CCCCC1                                      | -5.86 | 14.89 | 2.21 | P | OUT |
| QL02304 | N,N-Dichloro-2,2,3,3,4,4,4-heptafluorobutanamide                                                                                | 86451-48-1  | FC(F)(F)C(F)(F)C(F)(F)C(=O)N(C)Cl                                                   | -7.97 | 60.00 | 1.83 | P | IN  |
| QL02305 | 1-(Heptafluorobutryl)imidazole                                                                                                  | 32477-35-3  | FC(F)(F)C(F)(F)C(F)(F)C(=O)N1C=C-CN=C1                                              | -6.51 | 35.00 | 1.92 | P | IN  |
| QL02306 | N-Heptafluorobutrylproline                                                                                                      | 56236-41-0  | FC(F)(F)C(F)(F)C(F)(F)C(=O)N1CCC[C@H]1C(C)C=O                                       | -6.70 | 29.63 | 2.15 | P | IN  |
| QL02307 | 1-(2,3-Dihydro-1H-indol-1-yl)-2,2,3,3,4,4,4-heptafluoro-1-butanone                                                              | 543708-46-9 | FC(F)(F)C(F)(F)C(F)(F)C(=O)N1CCCC2=CC=CC=C12                                        | -6.57 | 24.14 | 2.24 | P | OUT |
| QL02308 | 2,2,3,3,4,4,4-heptafluoro-1-pyrrolidin-1-ylbutan-1-one                                                                          | 424-54-4    | FC(F)(F)C(F)(F)C(F)(F)C(=O)N1CCCC1                                                  | -6.04 | 28.00 | 1.92 | P | OUT |
| QL02309 | 2,2,3,3,4,4,4-Heptafluoro-1-(piperidin-1-yl)butan-1-one                                                                         | 425-19-4    | FC(F)(F)C(F)(F)C(F)(F)C(=O)N1CCCCC1                                                 | -6.45 | 25.00 | 2.17 | P | OUT |
| QL02310 | 1,1'-(Piperazine-1,4-diyl)bis(heptafluorobutan-1-one)                                                                           | 120219-50-3 | FC(F)(F)C(F)(F)C(F)(F)C(=O)N1CCN(CC1)C(=O)C(F)(F)C(F)(F)C(F)F                       | -8.50 | 36.84 | 2.69 | P | IN  |
| QL02311 | 1-[4-{[2H-1,3-Benzodioxol-5-yl)methyl]piperazin-1-yl}-2,2,3,3,4,4,4-heptafluorobutan-1-one                                      | 546063-97-2 | FC(F)(F)C(F)(F)C(F)(F)C(=O)N1CCN(Cc2ccc3OCOc3c2)CC1                                 | -7.62 | 16.28 | 2.89 | P | OUT |
| QL02312 | 2,2,3,3,4,4,4-Heptafluoro-1-(piperazin-1-yl)butan-1-one                                                                         | 89245-13-6  | FC(F)(F)C(F)(F)C(F)(F)C(=O)N1CCNCC1                                                 | -6.51 | 25.93 | 2.17 | P | OUT |
| QL02313 | 2,2,3,3,4,4,4-Heptafluoro-1-(morpholin-4-yl)butan-1-one                                                                         | 425-20-7    | FC(F)(F)C(F)(F)C(F)(F)C(=O)N1CCOCC1                                                 | -6.58 | 26.92 | 2.17 | P | OUT |
| QL02314 | N,N'-1,3-Phenylenebis(perfluorobutanamide)                                                                                      | 524726-48-5 | FC(F)(F)C(F)(F)C(F)(F)C(=O)NC1=CC(NC(=O)C(F)(F)C(F)(F)C(F)F)=CC=C1                  | -8.86 | 36.84 | 2.83 | P | IN  |
| QL02315 | Butanamide, N,N'-{1,1'-biphenyl-4,4'-diylbis(2,2,3,3,4,4,4-heptafluoro-N,N'-(Methylenedi-1,4-phenylene)bis(perfluorobutanamide) | 75042-07-8  | FC(F)(F)C(F)(F)C(F)(F)C(=O)NC1=CC=C(C=C1)C1=CC=C(NC(=O)C(F)(F)C(F)(F)C(F)F)C=C1     | -9.18 | 29.17 | 3.18 | P | OUT |
| QL02316 | phenylene)bis(perfluorobutanamide)                                                                                              | 124232-75-3 | FC(F)(F)C(F)(F)C(F)(F)C(=O)NC1=CC=C(C(C2=CC=C(C(NC(=O)C(F)(F)C(F)(F)C(F)F)C=C2)C=C1 | -9.29 | 27.45 | 3.27 | P | OUT |
| QL02317 | N,N'-1,4-Phenylenebis(perfluorobutanamide)                                                                                      | 524726-49-6 | FC(F)(F)C(F)(F)C(F)(F)C(=O)NC1=CC=C(C(NC(=O)C(F)(F)C(F)(F)C(F)F)C=C1                | -8.91 | 36.84 | 2.86 | P | IN  |
| QL02318 | Al 3-18011                                                                                                                      | 336-61-8    | FC(F)(F)C(F)(F)C(F)(F)C(=O)NC1=CC=CC=C1                                             | -6.84 | 28.00 | 2.25 | P | OUT |
| QL02319 | Thiobenzyl N-heptafluorobutrylanthranilate                                                                                      | 82422-25-1  | FC(F)(F)C(F)(F)C(F)(F)C(=O)NC1=CC=CC=C1C(=O)SCC1=CC=CC=C1                           | -7.66 | 17.07 | 2.89 | P | OUT |
| QL02320 | N-2-Pyridinylperfluorobutanamide                                                                                                | 283172-09-8 | FC(F)(F)C(F)(F)C(F)(F)C(=O)NC1=CC=CC=N1                                             | -6.92 | 29.17 | 2.25 | P | IN  |
| QL02321 | 2,2,3,3,4,4,4-Heptafluoro-N-(2-oxo-2,3-dihydropyrimidin-4-yl)butanamide                                                         | 94720-20-4  | FC(F)(F)C(F)(F)C(F)(F)C(=O)NC1=CC=NC(=O)N1                                          | -6.90 | 29.17 | 2.24 | P | IN  |
| QL02322 | (2-Naphthalenyl)perfluorobutanamide                                                                                             | 582-00-3    | FC(F)(F)C(F)(F)C(F)(F)C(=O)NC1=CC2=CC=CC=C2C=C1                                     | -7.14 | 22.58 | 2.52 | P | OUT |
| QL02323 | N-(2,6-Dichlorophenyl)-2,2,3,3,4,4,4-heptafluorobutanamide                                                                      | 121806-69-7 | FC(F)(F)C(F)(F)C(F)(F)C(=O)Nc1c(Cl)cccc1Cl                                          | -7.26 | 36.00 | 2.20 | P | IN  |
| QL02324 | 2,2,3,3,4,4,4-Heptafluoro-N-(2,4,5-trichlorophenyl)butanamide                                                                   | 121806-70-0 | FC(F)(F)C(F)(F)C(F)(F)C(=O)Nc1cc(Cl)c(Cl)cc1Cl                                      | -8.03 | 40.00 | 2.41 | P | IN  |
| QL02325 | N-(2,5-Dichlorophenyl)-2,2,3,3,4,4,4-heptafluorobutanamide                                                                      | 121806-67-5 | FC(F)(F)C(F)(F)C(F)(F)C(=O)Nc1cc(Cl)ccc1Cl                                          | -7.32 | 36.00 | 2.23 | P | IN  |
| QL02326 | N-(4-Bromophenyl)-2,2,3,3,4,4,4-heptafluorobutanamide                                                                           | 308-67-8    | FC(F)(F)C(F)(F)C(F)(F)C(=O)Nc1ccc(Br)cc1                                            | -7.58 | 32.00 | 2.44 | P | IN  |
| QL02327 | N-(4-Chlorophenyl)-2,2,3,3,4,4,4-heptafluorobutanamide                                                                          | 79497-98-6  | FC(F)(F)C(F)(F)C(F)(F)C(=O)Nc1ccc(Cl)cc1                                            | -7.58 | 32.00 | 2.44 | P | IN  |
| QL02328 | N-(2,4-Dichlorophenyl)-2,2,3,3,4,4,4-heptafluorobutanamide                                                                      | 121806-66-4 | FC(F)(F)C(F)(F)C(F)(F)C(=O)Nc1ccc(Cl)cc1Cl                                          | -7.78 | 36.00 | 2.42 | P | IN  |
| QL02329 | N-(3-Chlorophenyl)-2,2,3,3,4,4,4-heptafluorobutanamide                                                                          | 106376-36-7 | FC(F)(F)C(F)(F)C(F)(F)C(=O)Nc1cccc(Cl)c1                                            | -7.09 | 32.00 | 2.24 | P | IN  |
| QL02330 | N-(2,3-Dichlorophenyl)-2,2,3,3,4,4,4-heptafluorobutanamide                                                                      | 121806-68-6 | FC(F)(F)C(F)(F)C(F)(F)C(=O)Nc1cccc(Cl)c1Cl                                          | -7.32 | 36.00 | 2.23 | P | IN  |
| QL02331 | N-(9,10-Dioxo-9,10-dihydroanthracen-1-yl)-2,2,3,3,4,4,4-heptafluorobutanamide                                                   | 162441-56-7 | FC(F)(F)C(F)(F)C(F)(F)C(=O)Nc1cccc2C(=O)c3cccc3C(=O)c12                             | -7.26 | 18.92 | 2.67 | P | OUT |
| QL02332 | N-Cyclohexyl-2,2,3,3,4,4,4-heptafluorobutanamide                                                                                | 56663-38-8  | FC(F)(F)C(F)(F)C(F)(F)C(=O)NC1CCCCC1                                                | -6.48 | 22.58 | 2.25 | P | OUT |
| QL02333 | N-(2-Chlorophenyl)-2,2,3,3,4,4,4-heptafluorobutanamide                                                                          | 121806-65-3 | FC(F)(F)C(F)(F)C(F)(F)C(=O)Nc1cccc(Cl)                                              | -7.06 | 32.00 | 2.23 | P | IN  |
| QL02334 | 2,2,3,3,4,4,4-Heptafluoro-N-(2-iodophenyl)butanamide (1R-trans)-N,N'-1,2-                                                       | 378215-44-2 | FC(F)(F)C(F)(F)C(F)(F)C(=O)Nc1cccc1I                                                | -7.06 | 32.00 | 2.23 | P | IN  |
| QL02335 | Cyclohexanediylbis(perfluorobutanamide)                                                                                         | 133964-60-0 | FC(F)(F)C(F)(F)C(F)(F)C(=O)NC1CCCCC1NC(=O)C(F)(F)C(F)(F)C(F)F                       | -8.27 | 31.82 | 2.73 | P | IN  |
| QL02336 | 2,2,3,3,4,4,4-Heptafluoro-N-(1H-1,2,4-triazol-5-yl)butanamide                                                                   | 70501-47-2  | FC(F)(F)C(F)(F)C(F)(F)C(=O)Nc1Nncn1                                                 | -7.01 | 33.33 | 2.17 | P | IN  |
| QL02337 | Allylperfluorobutanamide                                                                                                        | 24429-61-6  | FC(F)(F)C(F)(F)C(F)(F)C(=O)NCC=C                                                    | -6.98 | 31.82 | 2.20 | P | IN  |
| QL02338 | N-(Phenylmethyl)perfluorobutanamide                                                                                             | 560-02-1    | FC(F)(F)C(F)(F)C(F)(F)C(=O)NCC1=CC=CC=C1                                            | -7.06 | 25.00 | 2.42 | P | OUT |
| QL02339 | 2,2,3,3,4,4,4-Heptafluoro-N-(2-phenylethyl)butanamide                                                                           | 29723-29-3  | FC(F)(F)C(F)(F)C(F)(F)C(=O)NCCC1=CC=CC=C1                                           | -7.06 | 22.58 | 2.49 | P | OUT |
| QL02340 | 2,2,3,3,4,4,4-Heptafluoro-N-(3-phenylpropyl)butanamide                                                                          | 77970-73-1  | FC(F)(F)C(F)(F)C(F)(F)C(=O)NCCCC1CCCCC1                                             | -7.30 | 20.59 | 2.64 | P | OUT |
| QL02341 | N,N'-bis(Perfluorobutanoyl)1,6-hexanediamine                                                                                    | 123665-83-8 | FC(F)(F)C(F)(F)C(F)(F)C(=O)NCCCCCCNC(=O)C(F)(F)C(F)(F)C(F)F                         | -8.79 | 30.43 | 2.98 | P | OUT |
| QL02342 | N,N'-bis(Perfluorobutanoyl)1,5-pentanediamine                                                                                   | 1814-80-8   | FC(F)(F)C(F)(F)C(F)(F)C(=O)NCCCCCNC(=O)C(F)(F)C(F)(F)C(F)F                          | -8.82 | 32.56 | 2.94 | P | OUT |
| QL02343 | N,N'-bis(Perfluorobutanoyl)1,4-butanediamine                                                                                    | 2967-59-1   | FC(F)(F)C(F)(F)C(F)(F)C(=O)NCCCCNC(=O)C(F)(F)C(F)(F)C(F)F                           | -8.70 | 35.00 | 2.82 | P | IN  |
| QL02344 | n-(2-chloroethyl)-2,2,3,3,4,4,4-heptafluorobutanamide                                                                           | 4314-29-8   | FC(F)(F)C(F)(F)C(F)(F)C(=O)NCCCl                                                    | -7.41 | 38.10 | 2.20 | P | IN  |
| QL02345 | N,N'-bis(Perfluorobutanoyl)1,3-propanediamine                                                                                   | 149981-59-9 | FC(F)(F)C(F)(F)C(F)(F)C(=O)NCCNC(=O)C(F)(F)C(F)(F)C(F)F                             | -8.77 | 37.84 | 2.77 | P | IN  |
| QL02346 | ST50925188                                                                                                                      | 86273-64-5  | FC(F)(F)C(F)(F)C(F)(F)C(=O)NCCNC(=O)C(F)(F)C(F)(F)C(F)F                             | -8.69 | 41.18 | 2.65 | P | IN  |
| QL02347 | N'-Benzylidene-2,2,3,3,4,4,4-heptafluorobutanethydrazide                                                                        | 736-62-9    | FC(F)(F)C(F)(F)C(F)(F)C(=O)NN=CC1CCCC1                                              | -7.22 | 25.00 | 2.49 | P | OUT |



|         |                                                                                                   |              |                                                                                              |       |       |      |   |     |
|---------|---------------------------------------------------------------------------------------------------|--------------|----------------------------------------------------------------------------------------------|-------|-------|------|---|-----|
| QL02348 | 2,2,3,3,4,4,4-Heptafluoro-N'-[(pyridin-4-yl)methylidene]butanehydrazide                           | 109373-81-1  | FC(F)(F)C(F)(F)C(F)(F)C(=O)NN=Cc1ccncc1                                                      | -7.28 | 25.93 | 2.49 | P | OUT |
| QL02349 | 2,2,3,3,4,4,4-heptafluoro-n'-(2,2,3,3,4,4,4-heptafluorobutanoyl)butanehydrazide                   | 648-19-1     | FC(F)(F)C(F)(F)C(F)(F)C(=O)NNC(=O)C(F)(F)C(F)(F)C(F)(F)F                                     | -8.81 | 50.00 | 2.45 | P | IN  |
| QL02350 | 2,2,3,3,4,4,4-Heptafluoro-N'-phenylbutanehydrazide                                                | 77146-66-8   | FC(F)(F)C(F)(F)C(F)(F)C(=O)NNc1ccccc1                                                        | -7.12 | 25.93 | 2.42 | P | OUT |
| QL02351 | 4-Chlorophenyl (2,2,3,3,4,4,4-heptafluorobutanoyl)sulfamate                                       | 1443258-17-0 | FC(F)(F)C(F)(F)C(F)(F)C(=O)NS(=O)(=O)Oc1ccc(Cl)cc1                                           | -7.87 | 27.59 | 2.68 | P | OUT |
| QL02352 | Heptafluorobutanoic anhydride                                                                     | NOCAS_861881 | FC(F)(F)C(F)(F)C(F)(F)C(=O)OC(=O)C(F)(F)C(F)(F)C(F)(F)F                                      | -9.05 | 56.00 | 2.38 | P | IN  |
| QL02353 | 1,1,1,3,3,3-Hexafluoro-2-(trifluoromethyl)propan-2-yl heptafluorobutanoate                        | 922168-38-5  | FC(F)(F)C(F)(F)C(F)(F)C(=O)OC(C(F)(F)C(F)(F)C(F)(F)C(F)(F)F                                  | -8.39 | 61.54 | 1.96 | P | IN  |
| QL02354 | Vinyl perfluorobutyrate                                                                           | 356-28-5     | FC(F)(F)C(F)(F)C(F)(F)C(=O)OC=C                                                              | -6.81 | 38.89 | 1.93 | P | IN  |
| QL02355 | Decane-1,10-diyl bis(heptafluorobutanoate)                                                        | 426-64-2     | FC(F)(F)C(F)(F)C(F)(F)C(=O)OCCCCCCCCCOC(=O)C(F)(F)C(F)(F)C(F)(F)F                            | -9.11 | 25.00 | 3.27 | P | OUT |
| QL02356 | bis(heptafluorobutryl)peroxide                                                                    | 336-64-1     | FC(F)(F)C(F)(F)C(F)(F)C(=O)OOC(=O)C(F)(F)C(F)(F)C(F)(F)F                                     | -9.07 | 53.85 | 2.45 | P | IN  |
| QL02357 | 2,2,3,3,4,4,4-Heptafluoro-1-(morpholin-4-yl)butane-1-thione                                       | 1206684-15-2 | FC(F)(F)C(F)(F)C(F)(F)C(=S)N1CCOCC1                                                          | -6.58 | 26.92 | 2.17 | P | OUT |
| QL02358 | 2,2,3,3,4,4,4-Heptafluoro-N-phenylbutanethioamide                                                 | 61881-12-7   | FC(F)(F)C(F)(F)C(F)(F)C(=S)NC1=CC=CC=C1                                                      | -6.84 | 28.00 | 2.25 | P | OUT |
| QL02359 | 2-bromo-1,1,1,3,3,4,4,5,5,5-decafluoro-2-(trifluoromethyl)pentane                                 | 22528-67-2   | FC(F)(F)C(F)(F)C(F)(F)C(Br)(C(F)(F)C(F)(F)C(F)(F)F                                           | -8.38 | 70.00 | 1.72 | P | OUT |
| QL02360 | 2-bromo-3,3,4,4,5,5,5-heptafluoropent-1-ene                                                       | 96916-53-9   | FC(F)(F)C(F)(F)C(F)(F)C(Br)=C                                                                | -6.63 | 53.33 | 1.46 | P | IN  |
| QL02361 | heptafluorobutanoyl bromide                                                                       | 375-13-3     | FC(F)(F)C(F)(F)C(F)(F)C(Br)=O                                                                | -7.18 | 61.54 | 1.46 | P | IN  |
| QL02362 | 4,5-Dibromo-1,1,1,2,2,3,3-heptafluoropentane                                                      | 377-46-8     | FC(F)(F)C(F)(F)C(F)(F)C(Br)CBr                                                               | -7.51 | 52.94 | 1.84 | P | IN  |
| QL02363 | 1,1,1,2,2,3,3,5,6,6-Undecafluoro-4,4,5-tris(trifluoromethyl)hexane                                | 86714-23-0   | FC(F)(F)C(F)(F)C(F)(F)C(C(F)(F)C(F)(F)C(F)(F)C(F)(F)C(F)(F)F                                 | -8.48 | 68.97 | 1.79 | P | OUT |
| QL02364 | 1,1,1,2,2,3,3,5,5,5-Decafluoro-4,4-bis(trifluoromethyl)pentane                                    | 29971-79-7   | FC(F)(F)C(F)(F)C(F)(F)C(C(F)(F)C(F)(F)C(F)(F)C(F)(F)F                                        | -8.14 | 69.57 | 1.63 | P | OUT |
| QL02365 | 4,4,5,5,6,6,6-Heptafluoro-3,3-bis(trifluoromethyl)hex-1-ene                                       | 79272-26-7   | FC(F)(F)C(F)(F)C(F)(F)C(C=C)C(C(F)(F)C(F)(F)C(F)(F)F                                         | -7.25 | 54.17 | 1.69 | P | IN  |
| QL02366 | 1-bromo-4,4,5,5,6,6-heptafluoro-3,3-bis(trifluoromethyl)hex-1-ene                                 | 128454-94-4  | FC(F)(F)C(F)(F)C(F)(F)C(C=CBr)C(C(F)(F)C(F)(F)C(F)(F)F                                       | -7.77 | 58.33 | 1.79 | P | IN  |
| QL02367 | 6,6,7,7,8,8,8-Heptafluoro-5,5-bis(trifluoromethyl)octa-1,3-diene                                  | 1429188-77-1 | FC(F)(F)C(F)(F)C(F)(F)C(C=C)C(C(F)(F)C(F)(F)C(F)(F)F                                         | -7.56 | 46.43 | 2.04 | P | IN  |
| QL02368 | 4,4,5,5,6,6,6-heptafluoro-1-iodo-3,3-bis(trifluoromethyl)hex-1-ene                                | 126681-21-8  | FC(F)(F)C(F)(F)C(F)(F)C(C=C)C(C(F)(F)C(F)(F)C(F)(F)F                                         | -7.77 | 58.33 | 1.79 | P | IN  |
| QL02369 | (Perfluoropropyl)-2-(2-phenylhydrazinylidene)ethanal phenylhydrazine                              | 57912-15-9   | FC(F)(F)C(F)(F)C(F)(F)C(C(=NNC1=CC=CC=C1)=NNC1=CC=CC=C1                                      | -7.15 | 17.07 | 2.68 | P | OUT |
| QL02370 | 2,2'-(2,2,3,3,4,4,4-Heptafluorobutane-1,1-diyl)di(1H-pyrrole)                                     | 164792-01-2  | FC(F)(F)C(F)(F)C(F)(F)C(c1Ncccc1)c1Ncccc1                                                    | -5.61 | 23.33 | 1.87 | P | OUT |
| QL02371 | (6E)-1,1,1,2,2,3,3,10,10,11,11,12,12-Tetradecafluoro-4,4,9,9-tetrakis(trifluoromethyl)dodec-6-ene | 1946796-71-9 | FC(F)(F)C(F)(F)C(F)(F)C(CC=CCC(C(F)(F)C(F)(F)C(F)(F)C(F)(F)C(F)(F)C(F)(F)C(F)(F)F            | -8.86 | 54.17 | 2.35 | P | IN  |
| QL02372 | Bis[4-[3,3,4,4,5,5,5-heptafluoro-2,2-bis(trifluoromethyl)pentyl]phenyl]phosphane                  | 322647-83-6  | FC(F)(F)C(F)(F)C(F)(F)C(CC1=CC=C(C=C1)P(C1=CC=CC=C1)C1=CC=C(CC(C(F)(F)C(F)(F)C(F)(F)C(F)(F)F | -9.24 | 34.21 | 3.07 | P | OUT |
| QL02373 | 1-Bromo-4-[3,3,4,4,5,5,5-heptafluoro-2,2-bis(trifluoromethyl)pentyl]benzene                       | 149068-60-0  | FC(F)(F)C(F)(F)C(F)(F)C(Cc1ccc(Br)cc1)(C(F)(F)C(F)(F)F                                       | -7.81 | 42.42 | 2.25 | P | IN  |
| QL02374 | Tris[4-[3,3,4,4,5,5,5-heptafluoro-2,2-bis(trifluoromethyl)pentyl]phenyl]phosphane                 | 322647-82-5  | FC(F)(F)C(F)(F)C(F)(F)C(Cc1ccc(cc1)P(c1ccc(C(C(F)(F)C(F)(F)C(F)(F)C(F)(F)C(F)(F)F            | -9.39 | 40.21 | 2.96 | P | IN  |
| QL02375 | 2-[3,3,4,4,5,5,5-Heptafluoro-2,2-bis(trifluoromethyl)pentyl]oxirane                               | 119285-89-1  | FC(F)(F)C(F)(F)C(F)(F)C(CC1CO1)(C(F)(F)C(F)(F)F                                              | -7.02 | 46.43 | 1.81 | P | IN  |
| QL02376 | 6-Bromo-1,1,1,2,2,3,3-heptafluoro-4,4-bis(trifluoromethyl)hexane                                  | 128454-91-1  | FC(F)(F)C(F)(F)C(F)(F)C(CCBr)C(F)(F)C(F)(F)F                                                 | -7.46 | 53.85 | 1.79 | P | IN  |
| QL02377 | 1,1,1,2,2,3,3-heptafluoro-6-iodo-4,4-bis(trifluoromethyl)hexane                                   | 115347-68-7  | FC(F)(F)C(F)(F)C(F)(F)C(CI)C(C(F)(F)C(F)(F)F                                                 | -7.46 | 53.85 | 1.79 | P | IN  |
| QL02378 | 2-Chloro(perfluoro-2-methylpentane)                                                               | 67437-97-2   | FC(F)(F)C(F)(F)C(F)(F)C(Cl)C(C(F)(F)C(F)(F)F                                                 | -8.38 | 70.00 | 1.72 | P | OUT |
| QL02379 | Trichloroheptafluorobutane                                                                        | 28984-80-7   | FC(F)(F)C(F)(F)C(F)(F)C(Cl)(Cl)Cl                                                            | -7.82 | 71.43 | 1.45 | P | OUT |
| QL02380 | Heptafluorobutryl Chloride                                                                        | 375-16-6     | FC(F)(F)C(F)(F)C(F)(F)C(Cl)=O                                                                | -7.18 | 61.54 | 1.46 | P | IN  |
| QL02381 | 4,5-Dichloro-1,1,1,2,2,3,3-heptafluoropentane                                                     | 577773-57-0  | FC(F)(F)C(F)(F)C(F)(F)C(Cl)Cl                                                                | -7.51 | 52.94 | 1.84 | P | IN  |
| QL02382 | 1,1,1,2,4,5,5,6,6,7,7,7-dodecafluoro-2,4-bis(trifluoromethyl)heptan-3-one                         | 95639-15-9   | FC(F)(F)C(F)(F)C(F)(F)C(F)(F)C(=O)C(F)(F)C(F)(F)C(F)(F)C(F)(F)F                              | -8.90 | 64.29 | 2.09 | P | IN  |
| QL02383 | Hexane, 1,1,1,2,2,3,3,4,5,5,6,6,6-tridecafluoro-4-(trifluoromethyl)-                              | 558-69-0     | FC(F)(F)C(F)(F)C(F)(F)C(F)(F)C(F)(F)C(F)(F)C(F)(F)F                                          | -8.66 | 69.57 | 1.85 | P | OUT |
| QL02384 | Perfluoroisohexane                                                                                | 355-04-4     | FC(F)(F)C(F)(F)C(F)(F)C(F)(F)C(F)(F)F                                                        | -8.38 | 70.00 | 1.72 | P | OUT |
| QL02385 | Chromium pentacarbonyl[perfluoro-4-(isocyanato-βC)butane]                                         | 106065-05-8  | FC(F)(F)C(F)(F)C(F)(F)C(F)(F)N#[C-]([C-]([C-]#[O+]))([C-]#[O+]))([C-]#[O+]))([C-]#[O+])      | -7.07 | 34.62 | 2.16 | P | IN  |
| QL02386 | 1-Bromoperfluorobutane                                                                            | 375-48-4     | FC(F)(F)C(F)(F)C(F)(F)C(F)(F)Br                                                              | -7.82 | 71.43 | 1.45 | P | OUT |
| QL02387 | 1-(4-Bromophenyl)-2,2,3,3,4,4,5,5,5-nonafluoropentane-1-one                                       | 1228786-80-8 | FC(F)(F)C(F)(F)C(F)(F)C(F)(F)C(=O)c1ccc(Br)cc1                                               | -8.06 | 38.46 | 2.46 | P | IN  |
| QL02388 | 2-(2,2,3,3,4,4,5,5,5-Nonafluoropentanoyl)cyclopentane-1-one                                       | 347361-45-9  | FC(F)(F)C(F)(F)C(F)(F)C(F)(F)C(=O)C1CCCC1=O                                                  | -6.92 | 32.14 | 2.17 | P | IN  |
| QL02389 | 1,1,1,2,2,3,3,4,4,8,9,9,10,10,11,11-Octadecafluoroundecane-5,7-dione                              | 261503-82-6  | FC(F)(F)C(F)(F)C(F)(F)C(F)(F)C(=O)CC(=O)C(F)(F)C(F)(F)C(F)(F)C(F)(F)F                        | -9.55 | 54.55 | 2.63 | P | IN  |
| QL02390 | 4,4,5,5,6,6,7,7,7-Nonafluoro-1-phenylheptane-1,3-dione                                            | 168920-97-6  | FC(F)(F)C(F)(F)C(F)(F)C(F)(F)C(=O)CC(=O)c1ccccc1                                             | -7.56 | 29.03 | 2.52 | P | OUT |



|         |                                                                                                        |              |                                                                                                                                                                                                                                                                                                                                                                                                                                                                                                                                                                                                                                                                                                                                                                                                                                                                                                                                                                                                                                                                                                                                                                                                                                                                                                                                                                                                                                                                                                                                                                                                                                                                                                                                                                                                                                                                                                                                                                                                                                                                                                                                                                                                                                                                                                                                                                                                                                                                                                                                                                                                                                                                                                                                                                                                                                                                                                                                                                                                                                                                                                                                                                                                                                                                                                                                                                                                                                                                                                                                                                                                                                                                                                                                                                                                                                                                                                                                                                                                                                                                                                                                                                                                                                                                                                                                                                                                                                                                                                                                                                                                                                                                                                                                                                                                                                                                                                                                                                                                                                                                                                                                                                                                                                                                                                                                                                                                                                                                                                                                                                                                                                                                                                                                                                                                                                                                                                                                                                                                                                                                                                                                                                                                                                                                                                                                                                                                                                                                                                                                           |        |       |      |   |     |
|---------|--------------------------------------------------------------------------------------------------------|--------------|-------------------------------------------------------------------------------------------------------------------------------------------------------------------------------------------------------------------------------------------------------------------------------------------------------------------------------------------------------------------------------------------------------------------------------------------------------------------------------------------------------------------------------------------------------------------------------------------------------------------------------------------------------------------------------------------------------------------------------------------------------------------------------------------------------------------------------------------------------------------------------------------------------------------------------------------------------------------------------------------------------------------------------------------------------------------------------------------------------------------------------------------------------------------------------------------------------------------------------------------------------------------------------------------------------------------------------------------------------------------------------------------------------------------------------------------------------------------------------------------------------------------------------------------------------------------------------------------------------------------------------------------------------------------------------------------------------------------------------------------------------------------------------------------------------------------------------------------------------------------------------------------------------------------------------------------------------------------------------------------------------------------------------------------------------------------------------------------------------------------------------------------------------------------------------------------------------------------------------------------------------------------------------------------------------------------------------------------------------------------------------------------------------------------------------------------------------------------------------------------------------------------------------------------------------------------------------------------------------------------------------------------------------------------------------------------------------------------------------------------------------------------------------------------------------------------------------------------------------------------------------------------------------------------------------------------------------------------------------------------------------------------------------------------------------------------------------------------------------------------------------------------------------------------------------------------------------------------------------------------------------------------------------------------------------------------------------------------------------------------------------------------------------------------------------------------------------------------------------------------------------------------------------------------------------------------------------------------------------------------------------------------------------------------------------------------------------------------------------------------------------------------------------------------------------------------------------------------------------------------------------------------------------------------------------------------------------------------------------------------------------------------------------------------------------------------------------------------------------------------------------------------------------------------------------------------------------------------------------------------------------------------------------------------------------------------------------------------------------------------------------------------------------------------------------------------------------------------------------------------------------------------------------------------------------------------------------------------------------------------------------------------------------------------------------------------------------------------------------------------------------------------------------------------------------------------------------------------------------------------------------------------------------------------------------------------------------------------------------------------------------------------------------------------------------------------------------------------------------------------------------------------------------------------------------------------------------------------------------------------------------------------------------------------------------------------------------------------------------------------------------------------------------------------------------------------------------------------------------------------------------------------------------------------------------------------------------------------------------------------------------------------------------------------------------------------------------------------------------------------------------------------------------------------------------------------------------------------------------------------------------------------------------------------------------------------------------------------------------------------------------------------------------------------------------------------------------------------------------------------------------------------------------------------------------------------------------------------------------------------------------------------------------------------------------------------------------------------------------------------------------------------------------------------------------------------------------------------------------------------------------------------------------------------|--------|-------|------|---|-----|
| QL02391 | 3,5-Bis(perfluorooxetyl)-1-(nonafluoropentanol)-1H-pyrazole                                            | 231630-88-9  | FC(F)(F)C(F)(F)C(F)(F)C(F)(C=O)N1N=C(C=C1C(F)(F)C(F)(F)C(F)(F)C(F)(F)C(F)(F)C(F)(F)C(F)(F)F                                                                                                                                                                                                                                                                                                                                                                                                                                                                                                                                                                                                                                                                                                                                                                                                                                                                                                                                                                                                                                                                                                                                                                                                                                                                                                                                                                                                                                                                                                                                                                                                                                                                                                                                                                                                                                                                                                                                                                                                                                                                                                                                                                                                                                                                                                                                                                                                                                                                                                                                                                                                                                                                                                                                                                                                                                                                                                                                                                                                                                                                                                                                                                                                                                                                                                                                                                                                                                                                                                                                                                                                                                                                                                                                                                                                                                                                                                                                                                                                                                                                                                                                                                                                                                                                                                                                                                                                                                                                                                                                                                                                                                                                                                                                                                                                                                                                                                                                                                                                                                                                                                                                                                                                                                                                                                                                                                                                                                                                                                                                                                                                                                                                                                                                                                                                                                                                                                                                                                                                                                                                                                                                                                                                                                                                                                                                                                                                                                               | -10.74 | 59.32 | 2.99 | P | OUT |
| QL02392 | 2,2,3,3,4,4,5,5,5-Nonafluoro-N-phenylpentanamide                                                       | 122590-97-0  | FC(F)(F)C(F)(F)C(F)(F)C(F)(F)C(F)(C=O)Nc1ccccc1                                                                                                                                                                                                                                                                                                                                                                                                                                                                                                                                                                                                                                                                                                                                                                                                                                                                                                                                                                                                                                                                                                                                                                                                                                                                                                                                                                                                                                                                                                                                                                                                                                                                                                                                                                                                                                                                                                                                                                                                                                                                                                                                                                                                                                                                                                                                                                                                                                                                                                                                                                                                                                                                                                                                                                                                                                                                                                                                                                                                                                                                                                                                                                                                                                                                                                                                                                                                                                                                                                                                                                                                                                                                                                                                                                                                                                                                                                                                                                                                                                                                                                                                                                                                                                                                                                                                                                                                                                                                                                                                                                                                                                                                                                                                                                                                                                                                                                                                                                                                                                                                                                                                                                                                                                                                                                                                                                                                                                                                                                                                                                                                                                                                                                                                                                                                                                                                                                                                                                                                                                                                                                                                                                                                                                                                                                                                                                                                                                                                                           | -7.63  | 32.14 | 2.46 | P | IN  |
| QL02393 | N,N'-bis(Perfluoropentanolyl)1,2-ethanediamine                                                         | 119403-53-1  | FC(F)(F)C(F)(F)C(F)(F)C(F)(F)C(F)(C=O)NCCN(C=O)C(F)(F)C(F)(F)C(F)(F)C(F)(F)F                                                                                                                                                                                                                                                                                                                                                                                                                                                                                                                                                                                                                                                                                                                                                                                                                                                                                                                                                                                                                                                                                                                                                                                                                                                                                                                                                                                                                                                                                                                                                                                                                                                                                                                                                                                                                                                                                                                                                                                                                                                                                                                                                                                                                                                                                                                                                                                                                                                                                                                                                                                                                                                                                                                                                                                                                                                                                                                                                                                                                                                                                                                                                                                                                                                                                                                                                                                                                                                                                                                                                                                                                                                                                                                                                                                                                                                                                                                                                                                                                                                                                                                                                                                                                                                                                                                                                                                                                                                                                                                                                                                                                                                                                                                                                                                                                                                                                                                                                                                                                                                                                                                                                                                                                                                                                                                                                                                                                                                                                                                                                                                                                                                                                                                                                                                                                                                                                                                                                                                                                                                                                                                                                                                                                                                                                                                                                                                                                                                              | -9.45  | 45.00 | 2.85 | P | IN  |
| QL02394 | Sodium perfluorovalerate                                                                               | 2706-89-0    | FC(F)(F)C(F)(F)C(F)(F)C(F)(F)C(F)(F)C(=O)O[Na]                                                                                                                                                                                                                                                                                                                                                                                                                                                                                                                                                                                                                                                                                                                                                                                                                                                                                                                                                                                                                                                                                                                                                                                                                                                                                                                                                                                                                                                                                                                                                                                                                                                                                                                                                                                                                                                                                                                                                                                                                                                                                                                                                                                                                                                                                                                                                                                                                                                                                                                                                                                                                                                                                                                                                                                                                                                                                                                                                                                                                                                                                                                                                                                                                                                                                                                                                                                                                                                                                                                                                                                                                                                                                                                                                                                                                                                                                                                                                                                                                                                                                                                                                                                                                                                                                                                                                                                                                                                                                                                                                                                                                                                                                                                                                                                                                                                                                                                                                                                                                                                                                                                                                                                                                                                                                                                                                                                                                                                                                                                                                                                                                                                                                                                                                                                                                                                                                                                                                                                                                                                                                                                                                                                                                                                                                                                                                                                                                                                                                            | -7.68  | 52.94 | 1.90 | P | IN  |
| QL02395 | Perfluoropentanoic anhydride                                                                           | 308-28-1     | FC(F)(F)C(F)(F)C(F)(F)C(F)(F)C(F)(C=O)OC(=O)C(F)(F)C(F)(F)C(F)(F)C(F)(F)F                                                                                                                                                                                                                                                                                                                                                                                                                                                                                                                                                                                                                                                                                                                                                                                                                                                                                                                                                                                                                                                                                                                                                                                                                                                                                                                                                                                                                                                                                                                                                                                                                                                                                                                                                                                                                                                                                                                                                                                                                                                                                                                                                                                                                                                                                                                                                                                                                                                                                                                                                                                                                                                                                                                                                                                                                                                                                                                                                                                                                                                                                                                                                                                                                                                                                                                                                                                                                                                                                                                                                                                                                                                                                                                                                                                                                                                                                                                                                                                                                                                                                                                                                                                                                                                                                                                                                                                                                                                                                                                                                                                                                                                                                                                                                                                                                                                                                                                                                                                                                                                                                                                                                                                                                                                                                                                                                                                                                                                                                                                                                                                                                                                                                                                                                                                                                                                                                                                                                                                                                                                                                                                                                                                                                                                                                                                                                                                                                                                                 | -9.79  | 58.06 | 2.63 | P | IN  |
| QL02396 | Vinyl perfluorovalerate                                                                                | 424-37-3     | FC(F)(F)C(F)(F)C(F)(F)C(F)(F)C(F)(C=O)OC=C                                                                                                                                                                                                                                                                                                                                                                                                                                                                                                                                                                                                                                                                                                                                                                                                                                                                                                                                                                                                                                                                                                                                                                                                                                                                                                                                                                                                                                                                                                                                                                                                                                                                                                                                                                                                                                                                                                                                                                                                                                                                                                                                                                                                                                                                                                                                                                                                                                                                                                                                                                                                                                                                                                                                                                                                                                                                                                                                                                                                                                                                                                                                                                                                                                                                                                                                                                                                                                                                                                                                                                                                                                                                                                                                                                                                                                                                                                                                                                                                                                                                                                                                                                                                                                                                                                                                                                                                                                                                                                                                                                                                                                                                                                                                                                                                                                                                                                                                                                                                                                                                                                                                                                                                                                                                                                                                                                                                                                                                                                                                                                                                                                                                                                                                                                                                                                                                                                                                                                                                                                                                                                                                                                                                                                                                                                                                                                                                                                                                                                | -7.70  | 42.86 | 2.19 | P | IN  |
| QL02397 | Allyl perfluoropentanoate                                                                              | 84145-17-5   | FC(F)(F)C(F)(F)C(F)(F)C(F)(F)C(F)(C=O)OCC=C                                                                                                                                                                                                                                                                                                                                                                                                                                                                                                                                                                                                                                                                                                                                                                                                                                                                                                                                                                                                                                                                                                                                                                                                                                                                                                                                                                                                                                                                                                                                                                                                                                                                                                                                                                                                                                                                                                                                                                                                                                                                                                                                                                                                                                                                                                                                                                                                                                                                                                                                                                                                                                                                                                                                                                                                                                                                                                                                                                                                                                                                                                                                                                                                                                                                                                                                                                                                                                                                                                                                                                                                                                                                                                                                                                                                                                                                                                                                                                                                                                                                                                                                                                                                                                                                                                                                                                                                                                                                                                                                                                                                                                                                                                                                                                                                                                                                                                                                                                                                                                                                                                                                                                                                                                                                                                                                                                                                                                                                                                                                                                                                                                                                                                                                                                                                                                                                                                                                                                                                                                                                                                                                                                                                                                                                                                                                                                                                                                                                                               | -7.53  | 37.50 | 2.27 | P | IN  |
| QL02398 | 3-(Trifluorosilyl)propyl nonafluoropentanoate                                                          | 32916-37-5   | FC(F)(F)C(F)(F)C(F)(F)C(F)(F)C(F)(C=O)OCCCSi(F)(F)F                                                                                                                                                                                                                                                                                                                                                                                                                                                                                                                                                                                                                                                                                                                                                                                                                                                                                                                                                                                                                                                                                                                                                                                                                                                                                                                                                                                                                                                                                                                                                                                                                                                                                                                                                                                                                                                                                                                                                                                                                                                                                                                                                                                                                                                                                                                                                                                                                                                                                                                                                                                                                                                                                                                                                                                                                                                                                                                                                                                                                                                                                                                                                                                                                                                                                                                                                                                                                                                                                                                                                                                                                                                                                                                                                                                                                                                                                                                                                                                                                                                                                                                                                                                                                                                                                                                                                                                                                                                                                                                                                                                                                                                                                                                                                                                                                                                                                                                                                                                                                                                                                                                                                                                                                                                                                                                                                                                                                                                                                                                                                                                                                                                                                                                                                                                                                                                                                                                                                                                                                                                                                                                                                                                                                                                                                                                                                                                                                                                                                       | -8.38  | 41.38 | 2.51 | P | IN  |
| QL02399 | 1,1,2-Tribromo-1-(nonafluorobutyl)ethane                                                               | 59665-24-6   | FC(F)(F)C(F)(F)C(F)(F)C(F)(F)C(F)(Br)C(Br)CBr                                                                                                                                                                                                                                                                                                                                                                                                                                                                                                                                                                                                                                                                                                                                                                                                                                                                                                                                                                                                                                                                                                                                                                                                                                                                                                                                                                                                                                                                                                                                                                                                                                                                                                                                                                                                                                                                                                                                                                                                                                                                                                                                                                                                                                                                                                                                                                                                                                                                                                                                                                                                                                                                                                                                                                                                                                                                                                                                                                                                                                                                                                                                                                                                                                                                                                                                                                                                                                                                                                                                                                                                                                                                                                                                                                                                                                                                                                                                                                                                                                                                                                                                                                                                                                                                                                                                                                                                                                                                                                                                                                                                                                                                                                                                                                                                                                                                                                                                                                                                                                                                                                                                                                                                                                                                                                                                                                                                                                                                                                                                                                                                                                                                                                                                                                                                                                                                                                                                                                                                                                                                                                                                                                                                                                                                                                                                                                                                                                                                                             | -8.12  | 60.00 | 1.89 | P | IN  |
| QL02400 | 2-Bromo-3,3,4,4,5,5,6,6,6-nonafluorohex-1-ene                                                          | 59665-23-5   | FC(F)(F)C(F)(F)C(F)(F)C(F)(F)C(F)(Br)C=C                                                                                                                                                                                                                                                                                                                                                                                                                                                                                                                                                                                                                                                                                                                                                                                                                                                                                                                                                                                                                                                                                                                                                                                                                                                                                                                                                                                                                                                                                                                                                                                                                                                                                                                                                                                                                                                                                                                                                                                                                                                                                                                                                                                                                                                                                                                                                                                                                                                                                                                                                                                                                                                                                                                                                                                                                                                                                                                                                                                                                                                                                                                                                                                                                                                                                                                                                                                                                                                                                                                                                                                                                                                                                                                                                                                                                                                                                                                                                                                                                                                                                                                                                                                                                                                                                                                                                                                                                                                                                                                                                                                                                                                                                                                                                                                                                                                                                                                                                                                                                                                                                                                                                                                                                                                                                                                                                                                                                                                                                                                                                                                                                                                                                                                                                                                                                                                                                                                                                                                                                                                                                                                                                                                                                                                                                                                                                                                                                                                                                                  | -7.62  | 55.56 | 1.81 | P | IN  |
| QL02401 | Nonafluoropentanyol bromide                                                                            | 159623-35-5  | FC(F)(F)C(F)(F)C(F)(F)C(F)(F)C(F)(Br)=O                                                                                                                                                                                                                                                                                                                                                                                                                                                                                                                                                                                                                                                                                                                                                                                                                                                                                                                                                                                                                                                                                                                                                                                                                                                                                                                                                                                                                                                                                                                                                                                                                                                                                                                                                                                                                                                                                                                                                                                                                                                                                                                                                                                                                                                                                                                                                                                                                                                                                                                                                                                                                                                                                                                                                                                                                                                                                                                                                                                                                                                                                                                                                                                                                                                                                                                                                                                                                                                                                                                                                                                                                                                                                                                                                                                                                                                                                                                                                                                                                                                                                                                                                                                                                                                                                                                                                                                                                                                                                                                                                                                                                                                                                                                                                                                                                                                                                                                                                                                                                                                                                                                                                                                                                                                                                                                                                                                                                                                                                                                                                                                                                                                                                                                                                                                                                                                                                                                                                                                                                                                                                                                                                                                                                                                                                                                                                                                                                                                                                                   | -8.08  | 62.50 | 1.81 | P | IN  |
| QL02402 | 5,6-dibromo-1,1,1,2,2,3,3,4,4-nonafluorohexane                                                         | 236736-19-9  | FC(F)(F)C(F)(F)C(F)(F)C(F)(F)C(F)(Br)CBr                                                                                                                                                                                                                                                                                                                                                                                                                                                                                                                                                                                                                                                                                                                                                                                                                                                                                                                                                                                                                                                                                                                                                                                                                                                                                                                                                                                                                                                                                                                                                                                                                                                                                                                                                                                                                                                                                                                                                                                                                                                                                                                                                                                                                                                                                                                                                                                                                                                                                                                                                                                                                                                                                                                                                                                                                                                                                                                                                                                                                                                                                                                                                                                                                                                                                                                                                                                                                                                                                                                                                                                                                                                                                                                                                                                                                                                                                                                                                                                                                                                                                                                                                                                                                                                                                                                                                                                                                                                                                                                                                                                                                                                                                                                                                                                                                                                                                                                                                                                                                                                                                                                                                                                                                                                                                                                                                                                                                                                                                                                                                                                                                                                                                                                                                                                                                                                                                                                                                                                                                                                                                                                                                                                                                                                                                                                                                                                                                                                                                                  | -7.82  | 55.00 | 1.90 | P | IN  |
| QL02403 | 2-Chloro-3,3,4,4,5,5,6,6,6-nonafluorohex-1-ene                                                         | 110927-72-5  | FC(F)(F)C(F)(F)C(F)(F)C(F)(F)C(F)(Cl)=C                                                                                                                                                                                                                                                                                                                                                                                                                                                                                                                                                                                                                                                                                                                                                                                                                                                                                                                                                                                                                                                                                                                                                                                                                                                                                                                                                                                                                                                                                                                                                                                                                                                                                                                                                                                                                                                                                                                                                                                                                                                                                                                                                                                                                                                                                                                                                                                                                                                                                                                                                                                                                                                                                                                                                                                                                                                                                                                                                                                                                                                                                                                                                                                                                                                                                                                                                                                                                                                                                                                                                                                                                                                                                                                                                                                                                                                                                                                                                                                                                                                                                                                                                                                                                                                                                                                                                                                                                                                                                                                                                                                                                                                                                                                                                                                                                                                                                                                                                                                                                                                                                                                                                                                                                                                                                                                                                                                                                                                                                                                                                                                                                                                                                                                                                                                                                                                                                                                                                                                                                                                                                                                                                                                                                                                                                                                                                                                                                                                                                                   | -7.62  | 55.56 | 1.81 | P | IN  |
| QL02404 | Nonafluoropentanyol chloride                                                                           | 375-60-0     | FC(F)(F)C(F)(F)C(F)(F)C(F)(F)C(F)(Cl)=O                                                                                                                                                                                                                                                                                                                                                                                                                                                                                                                                                                                                                                                                                                                                                                                                                                                                                                                                                                                                                                                                                                                                                                                                                                                                                                                                                                                                                                                                                                                                                                                                                                                                                                                                                                                                                                                                                                                                                                                                                                                                                                                                                                                                                                                                                                                                                                                                                                                                                                                                                                                                                                                                                                                                                                                                                                                                                                                                                                                                                                                                                                                                                                                                                                                                                                                                                                                                                                                                                                                                                                                                                                                                                                                                                                                                                                                                                                                                                                                                                                                                                                                                                                                                                                                                                                                                                                                                                                                                                                                                                                                                                                                                                                                                                                                                                                                                                                                                                                                                                                                                                                                                                                                                                                                                                                                                                                                                                                                                                                                                                                                                                                                                                                                                                                                                                                                                                                                                                                                                                                                                                                                                                                                                                                                                                                                                                                                                                                                                                                   | -8.08  | 62.50 | 1.81 | P | IN  |
| QL02405 | 5,6-Dichloro-1,1,1,2,2,3,3,4,4-nonafluorohexane                                                        | 136483-77-7  | FC(F)(F)C(F)(F)C(F)(F)C(F)(F)C(F)(Cl)CCl                                                                                                                                                                                                                                                                                                                                                                                                                                                                                                                                                                                                                                                                                                                                                                                                                                                                                                                                                                                                                                                                                                                                                                                                                                                                                                                                                                                                                                                                                                                                                                                                                                                                                                                                                                                                                                                                                                                                                                                                                                                                                                                                                                                                                                                                                                                                                                                                                                                                                                                                                                                                                                                                                                                                                                                                                                                                                                                                                                                                                                                                                                                                                                                                                                                                                                                                                                                                                                                                                                                                                                                                                                                                                                                                                                                                                                                                                                                                                                                                                                                                                                                                                                                                                                                                                                                                                                                                                                                                                                                                                                                                                                                                                                                                                                                                                                                                                                                                                                                                                                                                                                                                                                                                                                                                                                                                                                                                                                                                                                                                                                                                                                                                                                                                                                                                                                                                                                                                                                                                                                                                                                                                                                                                                                                                                                                                                                                                                                                                                                  | -7.82  | 55.00 | 1.90 | P | IN  |
| QL02406 | Perfluoro-3-methylheptane                                                                              | 153273-33-7  | FC(F)(F)C(F)(F)C(F)(F)C(F)(F)C(F)(F)C(F)(F)C(F)(F)F                                                                                                                                                                                                                                                                                                                                                                                                                                                                                                                                                                                                                                                                                                                                                                                                                                                                                                                                                                                                                                                                                                                                                                                                                                                                                                                                                                                                                                                                                                                                                                                                                                                                                                                                                                                                                                                                                                                                                                                                                                                                                                                                                                                                                                                                                                                                                                                                                                                                                                                                                                                                                                                                                                                                                                                                                                                                                                                                                                                                                                                                                                                                                                                                                                                                                                                                                                                                                                                                                                                                                                                                                                                                                                                                                                                                                                                                                                                                                                                                                                                                                                                                                                                                                                                                                                                                                                                                                                                                                                                                                                                                                                                                                                                                                                                                                                                                                                                                                                                                                                                                                                                                                                                                                                                                                                                                                                                                                                                                                                                                                                                                                                                                                                                                                                                                                                                                                                                                                                                                                                                                                                                                                                                                                                                                                                                                                                                                                                                                                       | -9.26  | 69.23 | 2.10 | P | OUT |
| QL02407 | 2,2,3,3,4,4,5,5,6,6,6-Undecafluoro-N-(2-phenylethyl)hexanamide                                         | 70414-01-6   | FC(F)(F)C(F)(F)C(F)(F)C(F)(F)C(F)(F)C(=O)NCCc1ccccc1                                                                                                                                                                                                                                                                                                                                                                                                                                                                                                                                                                                                                                                                                                                                                                                                                                                                                                                                                                                                                                                                                                                                                                                                                                                                                                                                                                                                                                                                                                                                                                                                                                                                                                                                                                                                                                                                                                                                                                                                                                                                                                                                                                                                                                                                                                                                                                                                                                                                                                                                                                                                                                                                                                                                                                                                                                                                                                                                                                                                                                                                                                                                                                                                                                                                                                                                                                                                                                                                                                                                                                                                                                                                                                                                                                                                                                                                                                                                                                                                                                                                                                                                                                                                                                                                                                                                                                                                                                                                                                                                                                                                                                                                                                                                                                                                                                                                                                                                                                                                                                                                                                                                                                                                                                                                                                                                                                                                                                                                                                                                                                                                                                                                                                                                                                                                                                                                                                                                                                                                                                                                                                                                                                                                                                                                                                                                                                                                                                                                                      | -8.19  | 29.73 | 2.76 | P | OUT |
| QL02408 | Perfluorohexanoic anhydride                                                                            | 308-13-4     | FC(F)(F)C(F)(F)C(F)(F)C(F)(F)C(F)(F)C(F)(C=O)OC(=O)C(F)(F)C(F)(F)C(F)(F)C(F)(F)F                                                                                                                                                                                                                                                                                                                                                                                                                                                                                                                                                                                                                                                                                                                                                                                                                                                                                                                                                                                                                                                                                                                                                                                                                                                                                                                                                                                                                                                                                                                                                                                                                                                                                                                                                                                                                                                                                                                                                                                                                                                                                                                                                                                                                                                                                                                                                                                                                                                                                                                                                                                                                                                                                                                                                                                                                                                                                                                                                                                                                                                                                                                                                                                                                                                                                                                                                                                                                                                                                                                                                                                                                                                                                                                                                                                                                                                                                                                                                                                                                                                                                                                                                                                                                                                                                                                                                                                                                                                                                                                                                                                                                                                                                                                                                                                                                                                                                                                                                                                                                                                                                                                                                                                                                                                                                                                                                                                                                                                                                                                                                                                                                                                                                                                                                                                                                                                                                                                                                                                                                                                                                                                                                                                                                                                                                                                                                                                                                                                          | -10.40 | 59.46 | 2.84 | P | OUT |
| QL02409 | Ethenyl undecafluorohexanoate                                                                          | 464-35-7     | FC(F)(F)C(F)(F)C(F)(F)C(F)(F)C(F)(F)C(F)(C=O)OC=C                                                                                                                                                                                                                                                                                                                                                                                                                                                                                                                                                                                                                                                                                                                                                                                                                                                                                                                                                                                                                                                                                                                                                                                                                                                                                                                                                                                                                                                                                                                                                                                                                                                                                                                                                                                                                                                                                                                                                                                                                                                                                                                                                                                                                                                                                                                                                                                                                                                                                                                                                                                                                                                                                                                                                                                                                                                                                                                                                                                                                                                                                                                                                                                                                                                                                                                                                                                                                                                                                                                                                                                                                                                                                                                                                                                                                                                                                                                                                                                                                                                                                                                                                                                                                                                                                                                                                                                                                                                                                                                                                                                                                                                                                                                                                                                                                                                                                                                                                                                                                                                                                                                                                                                                                                                                                                                                                                                                                                                                                                                                                                                                                                                                                                                                                                                                                                                                                                                                                                                                                                                                                                                                                                                                                                                                                                                                                                                                                                                                                         | -8.03  | 45.83 | 2.24 | P | IN  |
| QL02410 | Undecafluorohexanoyl chloride                                                                          | 335-53-5     | FC(F)(F)C(F)(F)C(F)(F)C(F)(F)C(F)(F)C(F)(Cl)=O                                                                                                                                                                                                                                                                                                                                                                                                                                                                                                                                                                                                                                                                                                                                                                                                                                                                                                                                                                                                                                                                                                                                                                                                                                                                                                                                                                                                                                                                                                                                                                                                                                                                                                                                                                                                                                                                                                                                                                                                                                                                                                                                                                                                                                                                                                                                                                                                                                                                                                                                                                                                                                                                                                                                                                                                                                                                                                                                                                                                                                                                                                                                                                                                                                                                                                                                                                                                                                                                                                                                                                                                                                                                                                                                                                                                                                                                                                                                                                                                                                                                                                                                                                                                                                                                                                                                                                                                                                                                                                                                                                                                                                                                                                                                                                                                                                                                                                                                                                                                                                                                                                                                                                                                                                                                                                                                                                                                                                                                                                                                                                                                                                                                                                                                                                                                                                                                                                                                                                                                                                                                                                                                                                                                                                                                                                                                                                                                                                                                                            | -8.36  | 63.16 | 1.90 | P | IN  |
| QL02411 | 1,2-Dibromoperfluoroheptane                                                                            | 678-32-0     | FC(F)(F)C(F)(F)C(F)(F)C(F)(F)C(F)(F)C(F)(Br)C(F)(F)Br                                                                                                                                                                                                                                                                                                                                                                                                                                                                                                                                                                                                                                                                                                                                                                                                                                                                                                                                                                                                                                                                                                                                                                                                                                                                                                                                                                                                                                                                                                                                                                                                                                                                                                                                                                                                                                                                                                                                                                                                                                                                                                                                                                                                                                                                                                                                                                                                                                                                                                                                                                                                                                                                                                                                                                                                                                                                                                                                                                                                                                                                                                                                                                                                                                                                                                                                                                                                                                                                                                                                                                                                                                                                                                                                                                                                                                                                                                                                                                                                                                                                                                                                                                                                                                                                                                                                                                                                                                                                                                                                                                                                                                                                                                                                                                                                                                                                                                                                                                                                                                                                                                                                                                                                                                                                                                                                                                                                                                                                                                                                                                                                                                                                                                                                                                                                                                                                                                                                                                                                                                                                                                                                                                                                                                                                                                                                                                                                                                                                                     | -9.40  | 69.57 | 2.15 | P | OUT |
| QL02412 | Perfluoro-2-methylheptane                                                                              | 153273-32-6  | FC(F)(F)C(F)(F)C(F)(F)C(F)(F)C(F)(F)C(F)(F)C(F)(F)C(F)(F)F                                                                                                                                                                                                                                                                                                                                                                                                                                                                                                                                                                                                                                                                                                                                                                                                                                                                                                                                                                                                                                                                                                                                                                                                                                                                                                                                                                                                                                                                                                                                                                                                                                                                                                                                                                                                                                                                                                                                                                                                                                                                                                                                                                                                                                                                                                                                                                                                                                                                                                                                                                                                                                                                                                                                                                                                                                                                                                                                                                                                                                                                                                                                                                                                                                                                                                                                                                                                                                                                                                                                                                                                                                                                                                                                                                                                                                                                                                                                                                                                                                                                                                                                                                                                                                                                                                                                                                                                                                                                                                                                                                                                                                                                                                                                                                                                                                                                                                                                                                                                                                                                                                                                                                                                                                                                                                                                                                                                                                                                                                                                                                                                                                                                                                                                                                                                                                                                                                                                                                                                                                                                                                                                                                                                                                                                                                                                                                                                                                                                                | -9.26  | 69.23 | 2.10 | P | OUT |
| QL02413 | (Perfluorohexyl)hexadecene                                                                             | 1244062-15-4 | FC(F)(F)C(F)(F)C(F)(F)C(F)(F)C(F)(F)C(F)(F)C(F)(F)C=C/C/CCCCCCCCCCCCC[H]                                                                                                                                                                                                                                                                                                                                                                                                                                                                                                                                                                                                                                                                                                                                                                                                                                                                                                                                                                                                                                                                                                                                                                                                                                                                                                                                                                                                                                                                                                                                                                                                                                                                                                                                                                                                                                                                                                                                                                                                                                                                                                                                                                                                                                                                                                                                                                                                                                                                                                                                                                                                                                                                                                                                                                                                                                                                                                                                                                                                                                                                                                                                                                                                                                                                                                                                                                                                                                                                                                                                                                                                                                                                                                                                                                                                                                                                                                                                                                                                                                                                                                                                                                                                                                                                                                                                                                                                                                                                                                                                                                                                                                                                                                                                                                                                                                                                                                                                                                                                                                                                                                                                                                                                                                                                                                                                                                                                                                                                                                                                                                                                                                                                                                                                                                                                                                                                                                                                                                                                                                                                                                                                                                                                                                                                                                                                                                                                                                                                  | -9.25  | 19.70 | 3.47 | P | OUT |
| QL02414 | Perfluorohexylbromide                                                                                  | 335-56-8     | FC(F)(F)C(F)(F)C(F)(F)C(F)(F)C(F)(F)C(F)(F)Br                                                                                                                                                                                                                                                                                                                                                                                                                                                                                                                                                                                                                                                                                                                                                                                                                                                                                                                                                                                                                                                                                                                                                                                                                                                                                                                                                                                                                                                                                                                                                                                                                                                                                                                                                                                                                                                                                                                                                                                                                                                                                                                                                                                                                                                                                                                                                                                                                                                                                                                                                                                                                                                                                                                                                                                                                                                                                                                                                                                                                                                                                                                                                                                                                                                                                                                                                                                                                                                                                                                                                                                                                                                                                                                                                                                                                                                                                                                                                                                                                                                                                                                                                                                                                                                                                                                                                                                                                                                                                                                                                                                                                                                                                                                                                                                                                                                                                                                                                                                                                                                                                                                                                                                                                                                                                                                                                                                                                                                                                                                                                                                                                                                                                                                                                                                                                                                                                                                                                                                                                                                                                                                                                                                                                                                                                                                                                                                                                                                                                             | -8.81  | 70.00 | 1.90 | P | OUT |
| QL02415 | N-(2,2,3,3,4,4,5,5,6,6,7,7,7-Tridecafluoroheptanimidoyl)benzenecarboximidamide                         | 123528-68-7  | FC(F)(F)C(F)(F)C(F)(F)C(F)(F)C(F)(F)C(F)(F)C(=N)N(C=N)c1ccccc1                                                                                                                                                                                                                                                                                                                                                                                                                                                                                                                                                                                                                                                                                                                                                                                                                                                                                                                                                                                                                                                                                                                                                                                                                                                                                                                                                                                                                                                                                                                                                                                                                                                                                                                                                                                                                                                                                                                                                                                                                                                                                                                                                                                                                                                                                                                                                                                                                                                                                                                                                                                                                                                                                                                                                                                                                                                                                                                                                                                                                                                                                                                                                                                                                                                                                                                                                                                                                                                                                                                                                                                                                                                                                                                                                                                                                                                                                                                                                                                                                                                                                                                                                                                                                                                                                                                                                                                                                                                                                                                                                                                                                                                                                                                                                                                                                                                                                                                                                                                                                                                                                                                                                                                                                                                                                                                                                                                                                                                                                                                                                                                                                                                                                                                                                                                                                                                                                                                                                                                                                                                                                                                                                                                                                                                                                                                                                                                                                                                                            | -8.50  | 34.21 | 2.76 | P | IN  |
| QL02416 | N-[(2,2,3,3,4,4,5,5,6,6,7,7,7-Tridecafluoroheptanimidoyl)oxy]benzenecarboximidamide                    | 146304-61-2  | FC(F)(F)C(F)(F)C(F)(F)C(F)(F)C(F)(F)C(F)(F)C(=N)ONC(=N)c1ccccc1                                                                                                                                                                                                                                                                                                                                                                                                                                                                                                                                                                                                                                                                                                                                                                                                                                                                                                                                                                                                                                                                                                                                                                                                                                                                                                                                                                                                                                                                                                                                                                                                                                                                                                                                                                                                                                                                                                                                                                                                                                                                                                                                                                                                                                                                                                                                                                                                                                                                                                                                                                                                                                                                                                                                                                                                                                                                                                                                                                                                                                                                                                                                                                                                                                                                                                                                                                                                                                                                                                                                                                                                                                                                                                                                                                                                                                                                                                                                                                                                                                                                                                                                                                                                                                                                                                                                                                                                                                                                                                                                                                                                                                                                                                                                                                                                                                                                                                                                                                                                                                                                                                                                                                                                                                                                                                                                                                                                                                                                                                                                                                                                                                                                                                                                                                                                                                                                                                                                                                                                                                                                                                                                                                                                                                                                                                                                                                                                                                                                           | -8.79  | 33.33 | 2.90 | P | IN  |
| QL02417 | 2-(2,2,3,3,4,4,5,5,6,6,7,7,7-Tridecafluoroheptanoyl)cyclohexan-1-one                                   | 141478-89-9  | FC(F)(F)C(F)(F)C(F)(F)C(F)(F)C(F)(F)C(F)(F)C(F)(F)C(=O)C1CCCCC1=O                                                                                                                                                                                                                                                                                                                                                                                                                                                                                                                                                                                                                                                                                                                                                                                                                                                                                                                                                                                                                                                                                                                                                                                                                                                                                                                                                                                                                                                                                                                                                                                                                                                                                                                                                                                                                                                                                                                                                                                                                                                                                                                                                                                                                                                                                                                                                                                                                                                                                                                                                                                                                                                                                                                                                                                                                                                                                                                                                                                                                                                                                                                                                                                                                                                                                                                                                                                                                                                                                                                                                                                                                                                                                                                                                                                                                                                                                                                                                                                                                                                                                                                                                                                                                                                                                                                                                                                                                                                                                                                                                                                                                                                                                                                                                                                                                                                                                                                                                                                                                                                                                                                                                                                                                                                                                                                                                                                                                                                                                                                                                                                                                                                                                                                                                                                                                                                                                                                                                                                                                                                                                                                                                                                                                                                                                                                                                                                                                                                                         | -7.96  | 35.14 | 2.51 | P | IN  |
| QL02418 | 8H,8H-Perfluoropentadecane-7,9-dione                                                                   | 261503-74-6  | FC(F)(F)C(F)(F)C(F)(F)C(F)(F)C(F)(F)C(F)(F)C(F)(F)C(F)(F)C(F)(F)C(F)(F)C(F)(F)F                                                                                                                                                                                                                                                                                                                                                                                                                                                                                                                                                                                                                                                                                                                                                                                                                                                                                                                                                                                                                                                                                                                                                                                                                                                                                                                                                                                                                                                                                                                                                                                                                                                                                                                                                                                                                                                                                                                                                                                                                                                                                                                                                                                                                                                                                                                                                                                                                                                                                                                                                                                                                                                                                                                                                                                                                                                                                                                                                                                                                                                                                                                                                                                                                                                                                                                                                                                                                                                                                                                                                                                                                                                                                                                                                                                                                                                                                                                                                                                                                                                                                                                                                                                                                                                                                                                                                                                                                                                                                                                                                                                                                                                                                                                                                                                                                                                                                                                                                                                                                                                                                                                                                                                                                                                                                                                                                                                                                                                                                                                                                                                                                                                                                                                                                                                                                                                                                                                                                                                                                                                                                                                                                                                                                                                                                                                                                                                                                                                           | -10.74 | 57.78 | 3.03 | P | OUT |
| QL02419 | 4,4,5,5,6,6,7,7,8,8,9,9-Tridecafluoro-1-phenylnonane-1,3-dione                                         | 99338-16-6   | FC(F)(F)C(F)(F)C(F)(F)C(F)(F)C(F)(F)C(F)(F)C(=O)CC(=O)C1=CC=CC=C1                                                                                                                                                                                                                                                                                                                                                                                                                                                                                                                                                                                                                                                                                                                                                                                                                                                                                                                                                                                                                                                                                                                                                                                                                                                                                                                                                                                                                                                                                                                                                                                                                                                                                                                                                                                                                                                                                                                                                                                                                                                                                                                                                                                                                                                                                                                                                                                                                                                                                                                                                                                                                                                                                                                                                                                                                                                                                                                                                                                                                                                                                                                                                                                                                                                                                                                                                                                                                                                                                                                                                                                                                                                                                                                                                                                                                                                                                                                                                                                                                                                                                                                                                                                                                                                                                                                                                                                                                                                                                                                                                                                                                                                                                                                                                                                                                                                                                                                                                                                                                                                                                                                                                                                                                                                                                                                                                                                                                                                                                                                                                                                                                                                                                                                                                                                                                                                                                                                                                                                                                                                                                                                                                                                                                                                                                                                                                                                                                                                                         | -8.56  | 35.14 | 2.76 | P | IN  |
| QL02420 | 7,7,8,8,9,9,10,10,11,11,12,12-Tridecafluoro-1-[1H-naphtho[2,3-d]imidazol-2-yl]dodecan-6-one            | 240121-57-7  | FC(F)(F)C(F)(F)C(F)(F)C(F)(F)C(F)(F)C(F)(F)C(=O)CCCCC1Nc2cc3cccc3cc2n1                                                                                                                                                                                                                                                                                                                                                                                                                                                                                                                                                                                                                                                                                                                                                                                                                                                                                                                                                                                                                                                                                                                                                                                                                                                                                                                                                                                                                                                                                                                                                                                                                                                                                                                                                                                                                                                                                                                                                                                                                                                                                                                                                                                                                                                                                                                                                                                                                                                                                                                                                                                                                                                                                                                                                                                                                                                                                                                                                                                                                                                                                                                                                                                                                                                                                                                                                                                                                                                                                                                                                                                                                                                                                                                                                                                                                                                                                                                                                                                                                                                                                                                                                                                                                                                                                                                                                                                                                                                                                                                                                                                                                                                                                                                                                                                                                                                                                                                                                                                                                                                                                                                                                                                                                                                                                                                                                                                                                                                                                                                                                                                                                                                                                                                                                                                                                                                                                                                                                                                                                                                                                                                                                                                                                                                                                                                                                                                                                                                                    | -8.88  | 23.21 | 3.22 | P | OUT |
| QL02421 | 7,7,8,8,9,9,10,10,11,11,12,12,12-tridecafluorododecan-6-one                                            | 237738-71-5  | FC(F)(F)C(F)(F)C(F)(F)C(F)(F)C(F)(F)C(F)(F)C(=O)CCCCC1Nc2cccc2n1                                                                                                                                                                                                                                                                                                                                                                                                                                                                                                                                                                                                                                                                                                                                                                                                                                                                                                                                                                                                                                                                                                                                                                                                                                                                                                                                                                                                                                                                                                                                                                                                                                                                                                                                                                                                                                                                                                                                                                                                                                                                                                                                                                                                                                                                                                                                                                                                                                                                                                                                                                                                                                                                                                                                                                                                                                                                                                                                                                                                                                                                                                                                                                                                                                                                                                                                                                                                                                                                                                                                                                                                                                                                                                                                                                                                                                                                                                                                                                                                                                                                                                                                                                                                                                                                                                                                                                                                                                                                                                                                                                                                                                                                                                                                                                                                                                                                                                                                                                                                                                                                                                                                                                                                                                                                                                                                                                                                                                                                                                                                                                                                                                                                                                                                                                                                                                                                                                                                                                                                                                                                                                                                                                                                                                                                                                                                                                                                                                                                          | -8.76  | 26.00 | 3.10 | P | OUT |
| QL02422 | 2,2,3,3,4,4,5,5,6,6,7,7,7-Tridecafluoro-1-(morpholin-4-yl)heptan-1-one                                 | 144237-77-4  | FC(F)(F)C(F)(F)C(F)(F)C(F)(F)C(F)(F)C(F)(F)C(=O)N1CCOCC1                                                                                                                                                                                                                                                                                                                                                                                                                                                                                                                                                                                                                                                                                                                                                                                                                                                                                                                                                                                                                                                                                                                                                                                                                                                                                                                                                                                                                                                                                                                                                                                                                                                                                                                                                                                                                                                                                                                                                                                                                                                                                                                                                                                                                                                                                                                                                                                                                                                                                                                                                                                                                                                                                                                                                                                                                                                                                                                                                                                                                                                                                                                                                                                                                                                                                                                                                                                                                                                                                                                                                                                                                                                                                                                                                                                                                                                                                                                                                                                                                                                                                                                                                                                                                                                                                                                                                                                                                                                                                                                                                                                                                                                                                                                                                                                                                                                                                                                                                                                                                                                                                                                                                                                                                                                                                                                                                                                                                                                                                                                                                                                                                                                                                                                                                                                                                                                                                                                                                                                                                                                                                                                                                                                                                                                                                                                                                                                                                                                                                  | -8.11  | 37.14 | 2.52 | P | IN  |
| QL02423 | N-Cyclohexyl-2,2,3,3,4,4,5,5,6,6,7,7,7-tridecafluoroheptanamide                                        | 73602-45-6   | FC(F)(F)C(F)(F)C(F)(F)C(F)(F)C(F)(F)C(F)(F)C(=O)Nc1CCCCC1                                                                                                                                                                                                                                                                                                                                                                                                                                                                                                                                                                                                                                                                                                                                                                                                                                                                                                                                                                                                                                                                                                                                                                                                                                                                                                                                                                                                                                                                                                                                                                                                                                                                                                                                                                                                                                                                                                                                                                                                                                                                                                                                                                                                                                                                                                                                                                                                                                                                                                                                                                                                                                                                                                                                                                                                                                                                                                                                                                                                                                                                                                                                                                                                                                                                                                                                                                                                                                                                                                                                                                                                                                                                                                                                                                                                                                                                                                                                                                                                                                                                                                                                                                                                                                                                                                                                                                                                                                                                                                                                                                                                                                                                                                                                                                                                                                                                                                                                                                                                                                                                                                                                                                                                                                                                                                                                                                                                                                                                                                                                                                                                                                                                                                                                                                                                                                                                                                                                                                                                                                                                                                                                                                                                                                                                                                                                                                                                                                                                                 | -8.25  | 32.50 | 2.71 | P | IN  |
| QL02424 | Sodium perfluoroheptanoate                                                                             | 20109-59-5   | FC(F)(F)C(F)(F)C(F)(F)C(F)(F)C(F)(F)C(F)(F)C(=O)O[Na]                                                                                                                                                                                                                                                                                                                                                                                                                                                                                                                                                                                                                                                                                                                                                                                                                                                                                                                                                                                                                                                                                                                                                                                                                                                                                                                                                                                                                                                                                                                                                                                                                                                                                                                                                                                                                                                                                                                                                                                                                                                                                                                                                                                                                                                                                                                                                                                                                                                                                                                                                                                                                                                                                                                                                                                                                                                                                                                                                                                                                                                                                                                                                                                                                                                                                                                                                                                                                                                                                                                                                                                                                                                                                                                                                                                                                                                                                                                                                                                                                                                                                                                                                                                                                                                                                                                                                                                                                                                                                                                                                                                                                                                                                                                                                                                                                                                                                                                                                                                                                                                                                                                                                                                                                                                                                                                                                                                                                                                                                                                                                                                                                                                                                                                                                                                                                                                                                                                                                                                                                                                                                                                                                                                                                                                                                                                                                                                                                                                                                     | -8.73  | 56.52 | 2.24 | P | IN  |
| QL02425 | Perfluoroheptanoic anhydride                                                                           | 78225-99-7   | FC(F)(F)C(F)(F)C(F)(F)C(F)(F)C(F)(F)C(F)(F)C(=O)OC(=O)F                                                                                                                                                                                                                                                                                                                                                                                                                                                                                                                                                                                                                                                                                                                                                                                                                                                                                                                                                                                                                                                                                                                                                                                                                                                                                                                                                                                                                                                                                                                                                                                                                                                                                                                                                                                                                                                                                                                                                                                                                                                                                                                                                                                                                                                                                                                                                                                                                                                                                                                                                                                                                                                                                                                                                                                                                                                                                                                                                                                                                                                                                                                                                                                                                                                                                                                                                                                                                                                                                                                                                                                                                                                                                                                                                                                                                                                                                                                                                                                                                                                                                                                                                                                                                                                                                                                                                                                                                                                                                                                                                                                                                                                                                                                                                                                                                                                                                                                                                                                                                                                                                                                                                                                                                                                                                                                                                                                                                                                                                                                                                                                                                                                                                                                                                                                                                                                                                                                                                                                                                                                                                                                                                                                                                                                                                                                                                                                                                                                                                   | -10.92 | 60.47 | 3.03 | P | OUT |
| QL02426 | Ethenyl tridecafluoroheptanoate                                                                        | 240408-96-2  | FC(F)(F)C(F)(F)C(F)(F)C(F)(F)C(F)(F)C(F)(F)C(=O)OC=C                                                                                                                                                                                                                                                                                                                                                                                                                                                                                                                                                                                                                                                                                                                                                                                                                                                                                                                                                                                                                                                                                                                                                                                                                                                                                                                                                                                                                                                                                                                                                                                                                                                                                                                                                                                                                                                                                                                                                                                                                                                                                                                                                                                                                                                                                                                                                                                                                                                                                                                                                                                                                                                                                                                                                                                                                                                                                                                                                                                                                                                                                                                                                                                                                                                                                                                                                                                                                                                                                                                                                                                                                                                                                                                                                                                                                                                                                                                                                                                                                                                                                                                                                                                                                                                                                                                                                                                                                                                                                                                                                                                                                                                                                                                                                                                                                                                                                                                                                                                                                                                                                                                                                                                                                                                                                                                                                                                                                                                                                                                                                                                                                                                                                                                                                                                                                                                                                                                                                                                                                                                                                                                                                                                                                                                                                                                                                                                                                                                                                      | -8.70  | 48.15 | 2.45 | P | IN  |
| QL02427 | Prop-2-en-1-yl tridecafluoroheptanoate                                                                 | 53378-90-8   | FC(F)(F)C(F)(F)C(F)(F)C(F)(F)C(F)(F)C(F)(F)C(=O)OCC=C                                                                                                                                                                                                                                                                                                                                                                                                                                                                                                                                                                                                                                                                                                                                                                                                                                                                                                                                                                                                                                                                                                                                                                                                                                                                                                                                                                                                                                                                                                                                                                                                                                                                                                                                                                                                                                                                                                                                                                                                                                                                                                                                                                                                                                                                                                                                                                                                                                                                                                                                                                                                                                                                                                                                                                                                                                                                                                                                                                                                                                                                                                                                                                                                                                                                                                                                                                                                                                                                                                                                                                                                                                                                                                                                                                                                                                                                                                                                                                                                                                                                                                                                                                                                                                                                                                                                                                                                                                                                                                                                                                                                                                                                                                                                                                                                                                                                                                                                                                                                                                                                                                                                                                                                                                                                                                                                                                                                                                                                                                                                                                                                                                                                                                                                                                                                                                                                                                                                                                                                                                                                                                                                                                                                                                                                                                                                                                                                                                                                                     | -8.53  | 43.33 | 2.52 | P | IN  |
| QL02428 | 7,7,8-Tribromo-1,1,1,2,2,3,3,4,4,5,5,6,6-tridecafluorooctane                                           | 59665-25-7   | FC(F)(F)C(F)(F)C(F)(F)C(F)(F)C(F)(F)C(F)(F)C(Br)(Br)CBr                                                                                                                                                                                                                                                                                                                                                                                                                                                                                                                                                                                                                                                                                                                                                                                                                                                                                                                                                                                                                                                                                                                                                                                                                                                                                                                                                                                                                                                                                                                                                                                                                                                                                                                                                                                                                                                                                                                                                                                                                                                                                                                                                                                                                                                                                                                                                                                                                                                                                                                                                                                                                                                                                                                                                                                                                                                                                                                                                                                                                                                                                                                                                                                                                                                                                                                                                                                                                                                                                                                                                                                                                                                                                                                                                                                                                                                                                                                                                                                                                                                                                                                                                                                                                                                                                                                                                                                                                                                                                                                                                                                                                                                                                                                                                                                                                                                                                                                                                                                                                                                                                                                                                                                                                                                                                                                                                                                                                                                                                                                                                                                                                                                                                                                                                                                                                                                                                                                                                                                                                                                                                                                                                                                                                                                                                                                                                                                                                                                                                   | -9.05  | 61.54 | 2.23 | P | IN  |
| QL02429 | 2-Bromo-2-(Perfluorohexyl)ethene (1Z)-1,2-Dibromo-3,3,4,4,5,5,6,6,7,7,8,8,8-tridecafluorooct-1-ene     | 51249-64-0   | FC(F)(F)C(F)(F)C(F)(F)C(F)(F)C(F)(F)C(F)(F)C(Br)=C                                                                                                                                                                                                                                                                                                                                                                                                                                                                                                                                                                                                                                                                                                                                                                                                                                                                                                                                                                                                                                                                                                                                                                                                                                                                                                                                                                                                                                                                                                                                                                                                                                                                                                                                                                                                                                                                                                                                                                                                                                                                                                                                                                                                                                                                                                                                                                                                                                                                                                                                                                                                                                                                                                                                                                                                                                                                                                                                                                                                                                                                                                                                                                                                                                                                                                                                                                                                                                                                                                                                                                                                                                                                                                                                                                                                                                                                                                                                                                                                                                                                                                                                                                                                                                                                                                                                                                                                                                                                                                                                                                                                                                                                                                                                                                                                                                                                                                                                                                                                                                                                                                                                                                                                                                                                                                                                                                                                                                                                                                                                                                                                                                                                                                                                                                                                                                                                                                                                                                                                                                                                                                                                                                                                                                                                                                                                                                                                                                                                                        | -8.66  | 58.33 | 2.16 | P | IN  |
| QL02430 | tridecafluorooct-1-ene                                                                                 | 59665-28-0   | FC(F)(F)C(F)(F)C(F)(F)C(F)(F)C(F)(F)C(F)(F)C(Br)=CBr                                                                                                                                                                                                                                                                                                                                                                                                                                                                                                                                                                                                                                                                                                                                                                                                                                                                                                                                                                                                                                                                                                                                                                                                                                                                                                                                                                                                                                                                                                                                                                                                                                                                                                                                                                                                                                                                                                                                                                                                                                                                                                                                                                                                                                                                                                                                                                                                                                                                                                                                                                                                                                                                                                                                                                                                                                                                                                                                                                                                                                                                                                                                                                                                                                                                                                                                                                                                                                                                                                                                                                                                                                                                                                                                                                                                                                                                                                                                                                                                                                                                                                                                                                                                                                                                                                                                                                                                                                                                                                                                                                                                                                                                                                                                                                                                                                                                                                                                                                                                                                                                                                                                                                                                                                                                                                                                                                                                                                                                                                                                                                                                                                                                                                                                                                                                                                                                                                                                                                                                                                                                                                                                                                                                                                                                                                                                                                                                                                                                                      | -9.13  | 62.50 | 2.24 | P | IN  |
| QL02431 | tridecafluoroheptanoyl bromide                                                                         | 159623-34-4  | FC(F)(F)C(F)(F)C(F)(F)C(F)(F)C(F)(F)C(F)(F)C(Br)=O                                                                                                                                                                                                                                                                                                                                                                                                                                                                                                                                                                                                                                                                                                                                                                                                                                                                                                                                                                                                                                                                                                                                                                                                                                                                                                                                                                                                                                                                                                                                                                                                                                                                                                                                                                                                                                                                                                                                                                                                                                                                                                                                                                                                                                                                                                                                                                                                                                                                                                                                                                                                                                                                                                                                                                                                                                                                                                                                                                                                                                                                                                                                                                                                                                                                                                                                                                                                                                                                                                                                                                                                                                                                                                                                                                                                                                                                                                                                                                                                                                                                                                                                                                                                                                                                                                                                                                                                                                                                                                                                                                                                                                                                                                                                                                                                                                                                                                                                                                                                                                                                                                                                                                                                                                                                                                                                                                                                                                                                                                                                                                                                                                                                                                                                                                                                                                                                                                                                                                                                                                                                                                                                                                                                                                                                                                                                                                                                                                                                                        | -9.02  | 63.64 | 2.16 | P | IN  |
| QL02432 | 7,8-Dibromo-1,1,1,2,2,3,3,4,4,5,5,6,6-tridecafluorooctane                                              | 51249-62-8   | FC(F)(F)C(F)(F)C(F)(F)C(F)(F)C(F)(F)C(F)(F)C(Br)CBr                                                                                                                                                                                                                                                                                                                                                                                                                                                                                                                                                                                                                                                                                                                                                                                                                                                                                                                                                                                                                                                                                                                                                                                                                                                                                                                                                                                                                                                                                                                                                                                                                                                                                                                                                                                                                                                                                                                                                                                                                                                                                                                                                                                                                                                                                                                                                                                                                                                                                                                                                                                                                                                                                                                                                                                                                                                                                                                                                                                                                                                                                                                                                                                                                                                                                                                                                                                                                                                                                                                                                                                                                                                                                                                                                                                                                                                                                                                                                                                                                                                                                                                                                                                                                                                                                                                                                                                                                                                                                                                                                                                                                                                                                                                                                                                                                                                                                                                                                                                                                                                                                                                                                                                                                                                                                                                                                                                                                                                                                                                                                                                                                                                                                                                                                                                                                                                                                                                                                                                                                                                                                                                                                                                                                                                                                                                                                                                                                                                                                       | -8.80  | 57.69 | 2.24 | P | IN  |
| QL02433 | Perfluoroheptanoyl chloride                                                                            | 52447-22-0   | FC(F)(F)C(F)(F)C(F)(F)C(F)(F)C(F)(F)C(F)(F)C(Cl)=O                                                                                                                                                                                                                                                                                                                                                                                                                                                                                                                                                                                                                                                                                                                                                                                                                                                                                                                                                                                                                                                                                                                                                                                                                                                                                                                                                                                                                                                                                                                                                                                                                                                                                                                                                                                                                                                                                                                                                                                                                                                                                                                                                                                                                                                                                                                                                                                                                                                                                                                                                                                                                                                                                                                                                                                                                                                                                                                                                                                                                                                                                                                                                                                                                                                                                                                                                                                                                                                                                                                                                                                                                                                                                                                                                                                                                                                                                                                                                                                                                                                                                                                                                                                                                                                                                                                                                                                                                                                                                                                                                                                                                                                                                                                                                                                                                                                                                                                                                                                                                                                                                                                                                                                                                                                                                                                                                                                                                                                                                                                                                                                                                                                                                                                                                                                                                                                                                                                                                                                                                                                                                                                                                                                                                                                                                                                                                                                                                                                                                        | -9.02  | 63.64 | 2.16 | P | IN  |
| QL02434 | 7,8-Dichloro-1,1,1,2,2,3,3,4,4,5,5,6,6-tridecafluorooctane                                             | 319490-55-6  | FC(F)(F)C(F)(F)C(F)(F)C(F)(F)C(F)(F)C(F)(F)C(Cl)CCl                                                                                                                                                                                                                                                                                                                                                                                                                                                                                                                                                                                                                                                                                                                                                                                                                                                                                                                                                                                                                                                                                                                                                                                                                                                                                                                                                                                                                                                                                                                                                                                                                                                                                                                                                                                                                                                                                                                                                                                                                                                                                                                                                                                                                                                                                                                                                                                                                                                                                                                                                                                                                                                                                                                                                                                                                                                                                                                                                                                                                                                                                                                                                                                                                                                                                                                                                                                                                                                                                                                                                                                                                                                                                                                                                                                                                                                                                                                                                                                                                                                                                                                                                                                                                                                                                                                                                                                                                                                                                                                                                                                                                                                                                                                                                                                                                                                                                                                                                                                                                                                                                                                                                                                                                                                                                                                                                                                                                                                                                                                                                                                                                                                                                                                                                                                                                                                                                                                                                                                                                                                                                                                                                                                                                                                                                                                                                                                                                                                                                       | -8.80  | 57.69 | 2.24 | P | IN  |
| QL02435 | 1-Bromopentadecafluoroheptane                                                                          | 375-88-2     | FC(F)(F)C(F)(F)C(F)(F)C(F)(F)C(F)(F)C(F)(F)C(F)(F)C(F)(F)Br                                                                                                                                                                                                                                                                                                                                                                                                                                                                                                                                                                                                                                                                                                                                                                                                                                                                                                                                                                                                                                                                                                                                                                                                                                                                                                                                                                                                                                                                                                                                                                                                                                                                                                                                                                                                                                                                                                                                                                                                                                                                                                                                                                                                                                                                                                                                                                                                                                                                                                                                                                                                                                                                                                                                                                                                                                                                                                                                                                                                                                                                                                                                                                                                                                                                                                                                                                                                                                                                                                                                                                                                                                                                                                                                                                                                                                                                                                                                                                                                                                                                                                                                                                                                                                                                                                                                                                                                                                                                                                                                                                                                                                                                                                                                                                                                                                                                                                                                                                                                                                                                                                                                                                                                                                                                                                                                                                                                                                                                                                                                                                                                                                                                                                                                                                                                                                                                                                                                                                                                                                                                                                                                                                                                                                                                                                                                                                                                                                                                               | -9.40  | 69.57 | 2.15 | P | OUT |
| QL02436 | 9H,9H-Triacontafluoro-8,10-heptadecanedione (1R,2R)-N,N'-bis(Perfluorooctanoyl)-1,2-cyclohexanediamine | 36554-97-9   | FC(F)(F)C(F)(F)C(F)(F)C(F)(F)C(F)(F)C(F)(F)C(F)(F)C(=O)N[C@@H]1CCCC[C@H]1NC(=O)C(F)(F)C(F)(F)C(F)(F)C(F)(F)C(F)(F)C(F)(F)C(F)(F)C(F)(F)C(F)(F)C(F)(F)C(F)(F)C(F)(F)C(F)(F)C(F)(F)C(F)(F)C(F)(F)C(F)(F)C(F)(F)C(F)(F)C(F)(F)C(F)(F)C(F)(F)C(F)(F)C(F)(F)C(F)(F)C(F)(F)C(F)(F)C(F)(F)C(F)(F)C(F)(F)C(F)(F)C(F)(F)C(F)(F)C(F)(F)C(F)(F)C(F)(F)C(F)(F)C(F)(F)C(F)(F)C(F)(F)C(F)(F)C(F)(F)C(F)(F)C(F)(F)C(F)(F)C(F)(F)C(F)(F)C(F)(F)C(F)(F)C(F)(F)C(F)(F)C(F)(F)C(F)(F)C(F)(F)C(F)(F)C(F)(F)C(F)(F)C(F)(F)C(F)(F)C(F)(F)C(F)(F)C(F)(F)C(F)(F)C(F)(F)C(F)(F)C(F)(F)C(F)(F)C(F)(F)C(F)(F)C(F)(F)C(F)(F)C(F)(F)C(F)(F)C(F)(F)C(F)(F)C(F)(F)C(F)(F)C(F)(F)C(F)(F)C(F)(F)C(F)(F)C(F)(F)C(F)(F)C(F)(F)C(F)(F)C(F)(F)C(F)(F)C(F)(F)C(F)(F)C(F)(F)C(F)(F)C(F)(F)C(F)(F)C(F)(F)C(F)(F)C(F)(F)C(F)(F)C(F)(F)C(F)(F)C(F)(F)C(F)(F)C(F)(F)C(F)(F)C(F)(F)C(F)(F)C(F)(F)C(F)(F)C(F)(F)C(F)(F)C(F)(F)C(F)(F)C(F)(F)C(F)(F)C(F)(F)C(F)(F)C(F)(F)C(F)(F)C(F)(F)C(F)(F)C(F)(F)C(F)(F)C(F)(F)C(F)(F)C(F)(F)C(F)(F)C(F)(F)C(F)(F)C(F)(F)C(F)(F)C(F)(F)C(F)(F)C(F)(F)C(F)(F)C(F)(F)C(F)(F)C(F)(F)C(F)(F)C(F)(F)C(F)(F)C(F)(F)C(F)(F)C(F)(F)C(F)(F)C(F)(F)C(F)(F)C(F)(F)C(F)(F)C(F)(F)C(F)(F)C(F)(F)C(F)(F)C(F)(F)C(F)(F)C(F)(F)C(F)(F)C(F)(F)C(F)(F)C(F)(F)C(F)(F)C(F)(F)C(F)(F)C(F)(F)C(F)(F)C(F)(F)C(F)(F)C(F)(F)C(F)(F)C(F)(F)C(F)(F)C(F)(F)C(F)(F)C(F)(F)C(F)(F)C(F)(F)C(F)(F)C(F)(F)C(F)(F)C(F)(F)C(F)(F)C(F)(F)C(F)(F)C(F)(F)C(F)(F)C(F)(F)C(F)(F)C(F)(F)C(F)(F)C(F)(F)C(F)(F)C(F)(F)C(F)(F)C(F)(F)C(F)(F)C(F)(F)C(F)(F)C(F)(F)C(F)(F)C(F)(F)C(F)(F)C(F)(F)C(F)(F)C(F)(F)C(F)(F)C(F)(F)C(F)(F)C(F)(F)C(F)(F)C(F)(F)C(F)(F)C(F)(F)C(F)(F)C(F)(F)C(F)(F)C(F)(F)C(F)(F)C(F)(F)C(F)(F)C(F)(F)C(F)(F)C(F)(F)C(F)(F)C(F)(F)C(F)(F)C(F)(F)C(F)(F)C(F)(F)C(F)(F)C(F)(F)C(F)(F)C(F)(F)C(F)(F)C(F)(F)C(F)(F)C(F)(F)C(F)(F)C(F)(F)C(F)(F)C(F)(F)C(F)(F)C(F)(F)C(F)(F)C(F)(F)C(F)(F)C(F)(F)C(F)(F)C(F)(F)C(F)(F)C(F)(F)C(F)(F)C(F)(F)C(F)(F)C(F)(F)C(F)(F)C(F)(F)C(F)(F)C(F)(F)C(F)(F)C(F)(F)C(F)(F)C(F)(F)C(F)(F)C(F)(F)C(F)(F)C(F)(F)C(F)(F)C(F)(F)C(F)(F)C(F)(F)C(F)(F)C(F)(F)C(F)(F)C(F)(F)C(F)(F)C(F)(F)C(F)(F)C(F)(F)C(F)(F)C(F)(F)C(F)(F)C(F)(F)C(F)(F)C(F)(F)C(F)(F)C(F)(F)C(F)(F)C(F)(F)C(F)(F)C(F)(F)C(F)(F)C(F)(F)C(F)(F)C(F)(F)C(F)(F)C(F)(F)C(F)(F)C(F)(F)C(F)(F)C(F)(F)C(F)(F)C(F)(F)C(F)(F)C(F)(F)C(F)(F)C(F)(F)C(F)(F)C(F)(F)C(F)(F)C(F)(F)C(F)(F)C(F)(F)C(F)(F)C(F)(F)C(F)(F)C(F)(F)C(F)(F)C(F)(F)C(F)(F)C(F)(F)C(F)(F)C(F)(F)C(F)(F)C(F)(F)C(F)(F)C(F)(F)C(F)(F)C(F)(F)C(F)(F)C(F)(F)C(F)(F)C(F)(F)C(F)(F)C(F)(F)C(F)(F)C(F)(F)C(F)(F)C(F)(F)C(F)(F)C(F)(F)C(F)(F)C(F)(F)C(F)(F)C(F)(F)C(F)(F)C(F)(F)C(F)(F)C(F)(F)C(F)(F)C(F)(F)C(F)(F)C(F)(F)C(F)(F)C(F)(F)C(F)(F)C(F)(F)C(F)(F)C(F)(F)C(F)(F)C(F)(F)C(F)(F)C(F)(F)C(F)(F)C(F)(F)C(F)(F)C(F)(F)C(F)(F)C(F)(F)C(F)(F)C(F)(F)C(F)(F)C(F)(F)C(F)(F)C(F)(F)C(F)(F)C(F)(F)C(F)(F)C(F)(F)C(F)(F)C(F)(F)C(F)(F)C(F)(F)C(F)(F)C(F)(F)C(F)(F)C(F)(F)C(F)(F)C(F)(F)C(F)(F)C(F)(F)C(F)(F)C(F)(F)C(F)(F)C(F)(F)C(F)(F)C(F)(F)C(F)(F)C(F)(F)C(F)(F)C(F)(F)C(F)(F)C(F)(F)C(F)(F)C(F)(F)C(F)(F)C(F)(F)C(F)(F)C(F)(F)C(F)(F)C(F)(F)C(F)(F)C(F)(F)C(F)(F)C(F)(F)C(F)(F)C(F)(F)C(F)(F)C(F)(F)C(F)(F)C(F)(F)C(F)(F)C(F)(F)C(F)(F)C(F)(F)C(F)(F)C(F)(F)C(F)(F)C(F)(F)C(F)(F)C(F)(F)C(F)(F)C(F)(F)C(F)(F)C(F)(F)C(F)(F)C(F)(F)C(F)(F)C(F)(F)C(F)(F)C(F)(F)C(F)(F)C(F)(F)C(F)(F)C(F)(F)C(F)(F)C(F)(F)C(F)(F)C(F)(F)C(F)(F)C(F)(F)C(F)(F)C(F)(F)C(F)(F)C(F)(F)C(F)(F)C(F)(F)C(F)(F)C(F)(F)C(F)(F)C(F)(F)C(F)(F)C(F)(F)C(F)(F)C(F)(F)C(F)(F)C(F)(F)C(F)(F)C(F)(F)C(F)(F)C(F)(F)C(F)(F)C(F)(F)C(F)(F)C(F)(F)C(F)(F)C(F)(F)C(F)(F)C(F)(F)C(F)(F)C(F)(F)C(F)(F)C(F)(F)C(F)(F)C(F)(F)C(F)(F)C(F)(F)C(F)(F)C(F)(F)C(F)(F)C(F)(F)C(F)(F)C(F)(F)C(F)(F)C(F)(F)C(F)(F)C(F)(F)C(F)(F)C(F)(F)C(F)(F)C(F)(F)C(F)(F)C(F)(F)C(F)(F)C(F)(F)C(F)(F)C(F)(F)C(F)(F)C(F)(F)C(F)(F)C(F)(F)C(F)(F)C(F)(F)C(F)(F)C(F)(F)C(F)(F)C(F)(F)C(F)(F)C(F)(F)C(F)(F)C(F)(F)C(F)(F)C(F)(F)C(F)(F)C(F)(F)C(F)(F)C(F)(F)C(F)(F)C(F)(F)C(F)(F)C(F)(F)C(F)(F)C(F)(F)C(F)(F)C(F)(F)C(F)(F)C(F)(F)C(F)(F)C(F)(F)C(F)(F)C(F)(F)C(F)(F)C(F)(F)C(F)(F)C(F)(F)C(F)(F)C(F)(F)C(F)(F)C(F)(F)C(F)(F)C(F)(F)C(F)(F)C(F)(F)C(F)(F)C(F)(F)C(F)(F)C(F)(F)C(F)(F)C(F)(F)C(F)(F)C(F)(F)C(F)(F)C(F)(F)C(F)(F)C(F)(F)C(F)(F)C(F)(F)C(F)(F)C(F)(F)C(F)(F)C(F)(F)C(F)(F)C(F)(F)C(F)(F)C(F)(F)C(F)(F)C(F)(F)C(F)(F)C(F)(F)C(F)(F)C(F)(F)C(F)(F)C(F)(F)C(F)(F)C(F)(F)C(F)(F)C(F)(F)C(F)(F)C(F)(F)C(F)(F)C(F)(F)C(F)(F)C(F)(F)C(F)(F)C(F)(F)C(F)(F)C(F)(F)C(F)(F)C(F)(F)C(F)(F)C(F)(F)C(F)(F)C(F)(F)C(F)(F)C(F)(F)C(F)(F)C(F)(F)C(F)(F)C(F)(F)C(F)(F)C(F)(F)C(F)(F)C(F)(F)C(F)(F)C(F)(F)C(F)(F)C(F)(F)C(F)(F)C(F)(F)C(F)(F)C(F)(F)C(F)(F)C(F)(F)C(F)(F)C(F)(F)C(F)(F)C(F)(F)C(F)(F)C(F)(F)C(F)(F)C(F)(F)C(F)(F)C(F)(F)C(F)(F)C(F)(F)C(F)(F)C(F)(F)C(F)(F)C(F)(F)C(F)(F)C(F)(F)C(F)(F)C(F)(F)C(F)(F)C(F)(F)C(F)(F)C(F)(F)C(F)(F)C(F)(F)C(F)(F)C(F)(F)C(F)(F)C(F)(F)C(F)(F)C(F)(F)C(F)(F)C(F)(F)C(F)(F)C(F)(F)C(F)(F)C(F)(F)C(F)(F)C(F)(F)C(F)(F)C(F)(F)C(F)(F)C(F)(F)C(F)(F)C(F)(F)C(F)(F)C(F)(F)C(F)(F)C(F)(F)C(F)(F)C(F)(F)C(F)(F)C(F)(F)C(F)(F)C(F)(F)C(F)(F)C(F)(F)C(F)(F)C(F)(F)C(F)(F)C(F)(F)C(F)(F)C(F)(F)C(F)(F)C(F)(F)C(F)(F)C(F)(F)C(F)(F)C(F)(F)C(F)(F)C(F)(F)C(F)(F)C(F)(F)C(F)(F)C(F)(F)C(F)(F)C(F)(F)C(F)(F)C(F)(F)C(F)(F)C(F)(F)C(F)(F)C(F)(F)C(F)(F)C(F)(F)C(F)(F)C(F)(F)C(F)(F)C(F)(F)C(F)(F)C(F)(F)C(F)(F)C(F)(F)C(F)(F)C(F)(F)C(F)(F)C(F)(F)C(F)(F)C(F)(F)C(F)(F)C(F)(F)C(F)(F)C(F)(F)C(F)(F)C(F)(F)C(F)(F)C(F)(F)C(F)(F)C(F)(F)C(F)(F)C(F)(F)C(F)(F)C(F)(F)C(F)(F)C(F)(F)C(F)(F)C(F)(F)C(F)(F)C(F)(F)C(F)(F)C(F)(F)C(F)(F)C(F)(F)C(F)(F)C(F)(F)C(F)(F)C(F)(F)C(F)(F)C(F)(F)C(F)(F)C(F)(F)C(F)(F)C(F)(F)C(F)(F)C(F)(F)C(F)(F)C(F)(F)C(F)(F)C(F)(F)C(F)(F)C(F)(F)C(F)(F)C(F)(F)C(F)(F)C(F)(F)C(F)(F)C(F)(F)C(F)(F)C(F)(F)C(F)(F)C(F)(F)C(F)(F)C(F)(F)C(F)(F)C(F)(F)C(F)(F)C(F)(F)C(F)(F)C(F)(F)C(F)(F)C(F)(F)C(F)(F)C(F)(F)C(F)(F)C(F)(F)C(F)(F)C(F)(F)C(F)(F)C(F)(F)C(F)(F)C(F)(F)C(F)(F)C(F)(F)C(F)(F)C(F)(F)C(F)(F)C(F)(F)C(F)(F)C(F)(F)C(F)(F)C(F)(F)C(F)(F)C(F)(F)C(F)(F)C(F)(F)C(F)(F)C(F)(F)C(F)(F)C(F)(F)C(F)(F)C(F)(F)C(F)(F)C(F)(F)C(F)(F)C(F)(F)C(F)(F)C(F)(F)C(F)(F)C(F)(F)C(F)(F)C(F)(F)C(F)(F)C(F)(F)C(F)(F)C(F)(F)C(F)(F)C(F)(F)C(F)(F)C(F)(F)C(F)(F)C(F)(F)C(F)(F)C(F)(F)C(F)(F)C(F)(F)C(F)(F)C(F)(F)C(F)(F)C(F)(F)C(F)(F)C(F)(F)C(F)(F)C(F)(F)C(F)(F)C(F)(F)C(F)(F)C(F)(F)C(F)(F)C(F)(F)C(F)(F)C(F)(F)C(F)(F)C(F)(F)C(F)(F)C(F)(F)C(F)(F)C(F)(F)C(F)(F)C(F)(F)C(F)(F)C(F)(F)C(F)(F)C(F)(F)C(F)(F)C(F)(F)C(F)(F)C(F)(F)C(F)(F)C(F)(F)C(F)(F)C(F)(F)C(F)(F)C(F)(F)C(F)(F)C(F)(F)C(F)(F)C(F)(F)C(F)(F)C(F)(F)C(F)(F)C(F)(F)C(F)(F)C(F)(F)C(F)(F)C(F)(F) |        |       |      |   |     |



[illegible]



[illegible]











[illegible]



[illegible]



[illegible]



[illegible]











[illegible]



[illegible]



|         |                                                                                                                                                                     |              |                                                                                         |        |       |      |   |     |
|---------|---------------------------------------------------------------------------------------------------------------------------------------------------------------------|--------------|-----------------------------------------------------------------------------------------|--------|-------|------|---|-----|
| QL02910 | Perfluoroalkyl (linear) sulfinate, n=5                                                                                                                              |              | FC(F)(F)C(F)(F)C(F)(F)C(F)(F)C(F)(F)S(O)=O                                              | -7.81  | 55.00 | 1.90 | P | IN  |
| QL02911 | 1,1,1,2,2,3,3,4,4,5,6,6-Tridecafluoro-5-iodohexane                                                                                                                  | 355-44-2     | FC(F)(F)C(F)(F)C(F)(F)C(F)(F)C(F)(F)C(F)(F)I                                            | -8.81  | 70.00 | 1.90 | P | OUT |
| QL02912 | 2,2,3,3,4,4,5,5,5-Nonafluoropentane-1,1-diol                                                                                                                        | 355-30-6     | FC(F)(F)C(F)(F)C(F)(F)C(F)(F)C(F)(F)C(O)O                                               | -7.07  | 47.37 | 1.81 | P | IN  |
| QL02913 | (3,3,4,4,5,5,6,6-Nonafluorohex-1-yn-1-yl)benzene                                                                                                                    | 66249-23-8   | FC(F)(F)C(F)(F)C(F)(F)C(F)(F)C(F)(F)C#Cc1ccccc1                                         | -7.72  | 34.62 | 2.43 | P | IN  |
| QL02914 | 2,2,3,3,4,4,5,5,5-nonafluoropentanenitrile                                                                                                                          | 22325-71-9   | FC(F)(F)C(F)(F)C(F)(F)C(F)(F)C(F)(F)C#N                                                 | -7.92  | 60.00 | 1.81 | P | IN  |
| QL02915 | 1H,1H,2H-Perfluoro-1-hexene                                                                                                                                         | 19430-93-4   | FC(F)(F)C(F)(F)C(F)(F)C(F)(F)C=C                                                        | -7.25  | 50.00 | 1.81 | P | IN  |
| QL02916 | (3,3,4,4,5,5,6,6-Nonafluoro-1-iodohex-1-en-1-yl)benzene                                                                                                             | 109574-90-5  | FC(F)(F)C(F)(F)C(F)(F)C(F)(F)C=C(I)C1=CC=CC=C1                                          | -7.78  | 35.71 | 2.42 | P | IN  |
| QL02917 | [(12)-3,3,4,4,5,5,6,6-Nonafluorohex-1-en-1-yl]benzene                                                                                                               | 95452-53-2   | FC(F)(F)C(F)(F)C(F)(F)C(F)(F)C=C/c1ccccc1                                               | -7.56  | 32.14 | 2.43 | P | IN  |
| QL02918 | 4,4,5,5,6,6,7,7,7-Nonafluorohepta-1,2-diene (5E)-                                                                                                                   | 132673-98-4  | FC(F)(F)C(F)(F)C(F)(F)C(F)(F)C=C/C                                                      | -7.31  | 47.37 | 1.91 | P | IN  |
| QL02919 | 1,1,1,2,2,3,3,4,4,7,7,8,8,9,9,10,10,11,12,12,13,13,14,14,14-Hexacosafuorotetradec-5-ene (5E)-1,1,1,2,2,3,3,4,4,7,7,8,8,9,9,10,10,11,12,12,12-Docosafuorododec-5-ene | 51249-69-5   | FC(F)(F)C(F)(F)C(F)(F)C(F)(F)C=CC(F)(F)C(F)(F)C(F)(F)C(F)(F)C(F)(F)C(F)(F)C(F)(F)F      | -10.78 | 61.90 | 2.93 | P | OUT |
| QL02920 | 1,1,1,2,2,3,3,4,4,7,7,8,8,9,9,10,10,11,11-icosafuoroundec-5-ene                                                                                                     | 51249-66-2   | FC(F)(F)C(F)(F)C(F)(F)C(F)(F)C=CC(F)(F)C(F)(F)C(F)(F)C(F)(F)C(F)(F)F                    | -10.24 | 61.11 | 2.73 | P | OUT |
| QL02921 | 1,1,1,2,2,3,3,4,4,7,7,8,8,9,9,10,10,10-Octadecafluorodec-5-ene                                                                                                      | 100508-28-9  | FC(F)(F)C(F)(F)C(F)(F)C(F)(F)C=CC(F)(F)C(F)(F)C(F)(F)C(F)(F)F                           | -9.96  | 60.61 | 2.63 | P | IN  |
| QL02922 | Perfluorovaleraldehyde                                                                                                                                              | 84551-43-9   | FC(F)(F)C(F)(F)C(F)(F)C(F)(F)C=CC(F)(F)C(F)(F)C(F)(F)F                                  | -9.48  | 60.00 | 2.45 | P | IN  |
| QL02923 | Perfluorobutyraldehyde                                                                                                                                              | 375-53-1     | FC(F)(F)C(F)(F)C(F)(F)C(F)(F)C=O                                                        | -7.67  | 56.25 | 1.81 | P | IN  |
| QL02924 | Perfluorobutylcyclohexane                                                                                                                                           | 374-60-7     | FC(F)(F)C(F)(F)C(F)(F)C(F)(F)C1(F)C(F)(F)C(F)(F)C(F)(F)C1(F)F                           | -9.29  | 66.67 | 2.19 | P | IN  |
| QL02925 | Perfluorodecahydro-1-(perfluorobutyl)naphthalene                                                                                                                    | 118914-93-5  | FC(F)(F)C(F)(F)C(F)(F)C(F)(F)C1(F)C(F)(F)C(F)(F)C(F)(F)C2(F)C(F)(F)C(F)(F)C12F          | -9.54  | 65.00 | 2.34 | P | IN  |
| QL02926 | Perfluorodecahydro-2-n-butyl-naphthalene                                                                                                                            | 119107-96-9  | FC(F)(F)C(F)(F)C(F)(F)C(F)(F)C1(F)C(F)(F)C(F)(F)C2(F)C(F)(F)C(F)(F)C(F)(F)C2(F)C1(F)F   | -9.97  | 65.00 | 2.51 | P | IN  |
| QL02927 | Furan, 2,2,3,3,4,5,5-heptafluorotetrahydro-4-(nonafluorobutyl)-                                                                                                     | 646-85-5     | FC(F)(F)C(F)(F)C(F)(F)C(F)(F)C1(F)C(F)(F)OC(F)(F)C1(F)F                                 | -8.90  | 64.00 | 2.10 | P | IN  |
| QL02928 | 3,4,4-Trifluoro-3-(nonafluorobutyl)-1,2lambda~6~-oxathietane-2,2-dione                                                                                              | 85211-95-6   | FC(F)(F)C(F)(F)C(F)(F)C(F)(F)C1(F)C(F)(F)OS1(=O)=O                                      | -7.70  | 54.55 | 1.87 | P | IN  |
| QL02929 | 2,2,3-Trifluoro-3-(nonafluorobutyl)oxirane                                                                                                                          | 72804-48-9   | FC(F)(F)C(F)(F)C(F)(F)C(F)(F)C1(F)OC1(F)F                                               | -8.36  | 63.16 | 1.90 | P | IN  |
| QL02930 | 2-(Nonafluorobutyl)-4H-1-benzopyran-4-one                                                                                                                           | 304877-96-1  | FC(F)(F)C(F)(F)C(F)(F)C(F)(F)C1=CC(=O)c2ccccc2O1                                        | -7.51  | 31.03 | 2.44 | P | IN  |
| QL02931 | 6-(Nonafluorobutyl)-2-phenylpyrimidin-4(3H)-one                                                                                                                     | 180748-44-1  | FC(F)(F)C(F)(F)C(F)(F)C(F)(F)C1=CC(=O)N(c1ccccc1)c1ccccc1                               | -7.45  | 27.27 | 2.52 | P | OUT |
| QL02932 | 6-(Nonafluorobutyl)-2-sulfinyldiene-2,3-dihydropyrimidin-4(1H)-one                                                                                                  | 1426894-99-6 | FC(F)(F)C(F)(F)C(F)(F)C(F)(F)C1=CC(=O)NC(=S)N1                                          | -7.28  | 37.50 | 2.17 | P | IN  |
| QL02933 | 9-(Nonafluorobutyl)-2,3,6,7-tetrahydro-1H,5H,11H-pyrano[2,3-f]pyrido[3,2,1-ij]quinolin-11-one                                                                       | 355822-08-1  | FC(F)(F)C(F)(F)C(F)(F)C(F)(F)C1=CC(=O)Oc2c3CCCN4CCCCc(cc12)c34                          | -6.93  | 20.00 | 2.51 | P | OUT |
| QL02934 | Benzene, (nonafluorobutyl)-                                                                                                                                         | 2398-75-6    | FC(F)(F)C(F)(F)C(F)(F)C(F)(F)C1=CC=CC=C1                                                | -7.32  | 37.50 | 2.18 | P | IN  |
| QL02935 | 2-(Nonafluorobutyl)-1H-indene                                                                                                                                       | 1608112-37-3 | FC(F)(F)C(F)(F)C(F)(F)C(F)(F)C1=CC2C=CC=CC2C1                                           | -7.07  | 31.03 | 2.26 | P | IN  |
| QL02936 | SCHSEMBL1270621                                                                                                                                                     | 58671-28-6   | FC(F)(F)C(F)(F)C(F)(F)C(F)(F)C1=CN(C(=O)N)C1=O                                          | -7.47  | 37.50 | 2.24 | P | IN  |
| QL02937 | 4-(Nonafluorobutyl)-1,3-dihydro-2H-1,5-benzodiazepin-2-one                                                                                                          | 96146-12-2   | FC(F)(F)C(F)(F)C(F)(F)C(F)(F)C1=NC2C=CC=CC2N(C=O)C1                                     | -7.26  | 28.13 | 2.42 | P | OUT |
| QL02938 | 2-(Nonafluorobutyl)-1-benzofuran                                                                                                                                    | 1608112-36-2 | FC(F)(F)C(F)(F)C(F)(F)C(F)(F)C1c2ccccc2o1                                               | -7.22  | 33.33 | 2.26 | P | IN  |
| QL02939 | 2-(Nonafluorobutyl)-1-benzothiophene                                                                                                                                | 1608112-38-4 | FC(F)(F)C(F)(F)C(F)(F)C(F)(F)C1c2ccccc2s1                                               | -7.22  | 33.33 | 2.26 | P | IN  |
| QL02940 | 4-(Nonafluorobutyl)benzene-1,2-dicarbonitrile                                                                                                                       | 1207299-71-5 | FC(F)(F)C(F)(F)C(F)(F)C(F)(F)C1c1cccc(C#N)c(c1)C#N                                      | -7.78  | 34.62 | 2.45 | P | IN  |
| QL02941 | 1-Ethynyl-4-(nonafluorobutyl)benzene                                                                                                                                | 159241-92-6  | FC(F)(F)C(F)(F)C(F)(F)C(F)(F)C1c1cccc(C#C)cc1                                           | -7.66  | 32.14 | 2.47 | P | IN  |
| QL02942 | 4-(Nonafluorobutyl)benzonitrile                                                                                                                                     | 137052-16-5  | FC(F)(F)C(F)(F)C(F)(F)C(F)(F)C1c1cccc(c1)C#N                                            | -7.92  | 36.00 | 2.47 | P | IN  |
| QL02943 | 7-(Nonafluorobutyl)-1-benzothiophene                                                                                                                                | 1608112-40-8 | FC(F)(F)C(F)(F)C(F)(F)C(F)(F)C1c1cccc2ccsc12                                            | -6.98  | 33.33 | 2.16 | P | IN  |
| QL02944 | Tetrahydr-(perfluorobutyl)furan                                                                                                                                     | 26446-59-3   | FC(F)(F)C(F)(F)C(F)(F)C(F)(F)C1CCCCO1                                                   | -6.55  | 36.00 | 1.91 | P | IN  |
| QL02945 | 2-(Nonafluorobutyl)thiophene                                                                                                                                        | 96721-81-2   | FC(F)(F)C(F)(F)C(F)(F)C(F)(F)C1c1cccs1                                                  | -7.01  | 42.86 | 1.91 | P | IN  |
| QL02946 | 3-(Nonafluorobutyl)-1H-indole                                                                                                                                       | 1608112-33-9 | FC(F)(F)C(F)(F)C(F)(F)C(F)(F)C1c1cNc2ccccc12                                            | -7.11  | 32.14 | 2.24 | P | IN  |
| QL02947 | Nonafluorobutylepoxide                                                                                                                                              | 89807-87-4   | FC(F)(F)C(F)(F)C(F)(F)C(F)(F)C1CO1                                                      | -7.07  | 47.37 | 1.81 | P | IN  |
| QL02948 | 4-(Nonafluorobutyl)-1,3-dioxolan-2-one                                                                                                                              | 1469980-27-5 | FC(F)(F)C(F)(F)C(F)(F)C(F)(F)C1COC(=O)O1                                                | -7.55  | 40.91 | 2.18 | P | IN  |
| QL02949 | 3-(Nonafluorobutyl)-1-benzothiophene                                                                                                                                | 1608112-39-5 | FC(F)(F)C(F)(F)C(F)(F)C(F)(F)C1csc2ccccc12                                              | -7.19  | 33.33 | 2.24 | P | IN  |
| QL02950 | 2-(Nonafluorobutyl)-1H-indole                                                                                                                                       | 1608112-34-0 | FC(F)(F)C(F)(F)C(F)(F)C(F)(F)C1c1Nc2ccccc2c1                                            | -7.14  | 32.14 | 2.26 | P | IN  |
| QL02951 | 3-(Nonafluorobutyl)-5-phenyl-1H-pyrazole                                                                                                                            | 204130-95-0  | FC(F)(F)C(F)(F)C(F)(F)C(F)(F)C1nNc(c1):c1ccccc1                                         | -7.65  | 29.03 | 2.55 | P | OUT |
| QL02952 | 11-(Nonafluorobutyl)-9,10-dihydro-9,10-(epithiomethano)anthracene                                                                                                   | 267648-90-8  | FC(F)(F)C(F)(F)C(F)(F)C(F)(F)C1SC2c3ccccc3C1c1ccccc21                                   | -6.84  | 22.50 | 2.40 | P | OUT |
| QL02953 | 3,3,4,4,5,5,6,6,6-Nonafluorohexanoyl chloride                                                                                                                       | 64018-24-2   | FC(F)(F)C(F)(F)C(F)(F)C(F)(F)C(F)(F)CCl(Cl)=O                                           | -7.66  | 52.63 | 1.90 | P | IN  |
| QL02954 | Thiols, C10-20, -gamma-, -omega-, perfluoro (Perfluoroalkyl(C8-18)ethyl mercaptan)                                                                                  | 68140-21-6   | FC(F)(F)C(F)(F)C(F)(F)C(F)(F)CC(F)(F)C(F)(F)C(F)(F)CS                                   | -8.64  | 45.45 | 2.51 | P | IN  |
| QL02955 | 1,1,1,2,2,3,3,4,4,6,6,8,8-Tridecafluoro-10-iodododecane                                                                                                             | 272451-64-6  | FC(F)(F)C(F)(F)C(F)(F)C(F)(F)C(F)(F)CC(F)(F)C(F)(F)CI                                   | -8.56  | 43.75 | 2.52 | P | IN  |
| QL02956 | 1,1,1,2,2,3,3,4,4,6,6,8,8-Tridecafluoro-8-iodooctane                                                                                                                | 99325-17-4   | FC(F)(F)C(F)(F)C(F)(F)C(F)(F)C(F)(F)CC(F)(F)C(F)(F)I                                    | -8.54  | 53.85 | 2.23 | P | IN  |
| QL02957 | 1,1,1,2,2,3,3,4,4,6,6,8-Undecafluoro-8-iodooctane                                                                                                                   | 53626-95-2   | FC(F)(F)C(F)(F)C(F)(F)C(F)(F)C(F)(F)CC(F)(F)CI                                          | -8.06  | 46.15 | 2.25 | P | IN  |
| QL02958 | 4-(Perfluorobutyl)-3,3-difluorobutanesulfonyl chloride                                                                                                              | 1225375-54-1 | FC(F)(F)C(F)(F)C(F)(F)C(F)(F)CC(F)(F)CCS(Cl)(Cl)=O                                      | -8.09  | 41.38 | 2.39 | P | IN  |
| QL02959 | 1-(3,3,4,4,5,5,6,6-Nonafluoro-1-iodohexyl)-2,8,9-trioxo-5-aza-1-silabicyclo[3.3.3]undecane                                                                          | 135587-13-2  | FC(F)(F)C(F)(F)C(F)(F)C(F)(F)CC(I)(I)[Si](12OCCN(CCO1)CCO2                              | -7.13  | 23.81 | 2.49 | P | OUT |
| QL02960 | 1,1,1,2,2,3,3,4,4,5,5,6,6,7,7,8,8,11,11,12,12,13,13,14,14,14-Hexacosafuoro-9-iodotetradecane                                                                        | 53638-13-4   | FC(F)(F)C(F)(F)C(F)(F)C(F)(F)CC(I)(I)C(F)(F)C(F)(F)C(F)(F)C(F)(F)C(F)(F)C(F)(F)C(F)(F)F | -10.76 | 61.36 | 2.94 | P | OUT |
| QL02961 | 1-Iodo-1,2-bis(perfluoro-n-butyl)ethane                                                                                                                             | 53638-10-1   | FC(F)(F)C(F)(F)C(F)(F)C(F)(F)CC(I)(I)C1CCCCC1                                           | -9.53  | 59.38 | 2.49 | P | IN  |
| QL02962 | (3,3,4,4,5,5,6,6-Nonafluoro-1-iodohexyl)cyclohexane                                                                                                                 | 1464148-71-7 | FC(F)(F)C(F)(F)C(F)(F)C(F)(F)CC(I)(I)C1CCCCC1                                           | -7.24  | 27.78 | 2.42 | P | OUT |
| QL02963 | 1,1,1,2,2,3,3,4,4,10,10,11,11,12,12,13,13,13-Octadecafluoro-6,8-diodotridecane                                                                                      | 40735-21-5   | FC(F)(F)C(F)(F)C(F)(F)C(F)(F)CC(I)(I)CC(I)(I)C(F)(F)C(F)(F)C(F)(F)F                     | -9.58  | 48.78 | 2.80 | P | IN  |



|         |                                                                                                                |              |                                                                                                         |        |       |      |   |     |
|---------|----------------------------------------------------------------------------------------------------------------|--------------|---------------------------------------------------------------------------------------------------------|--------|-------|------|---|-----|
| QL02964 | 1,1,1,2,2,3,3,4,4,11,11,12,12,13,13,14,14,14-Octadecafluoro-6,9-diiodotetradecane                              | 40735-23-7   | FC(F)(F)C(F)(F)C(F)(F)C(F)(F)CC(I)CCC(I)CC(F)(F)C(F)(F)C(F)(F)F                                         | -9.48  | 45.45 | 2.85 | P | IN  |
| QL02965 | 1,1,1,2,2,3,3,4,4,12,12,13,13,14,14,15,15-Octadecafluoro-6,10-diiodopentadecane                                | 40735-25-9   | FC(F)(F)C(F)(F)C(F)(F)C(F)(F)C(CI)CCCC(I)CC(F)(F)C(F)(F)C(F)(F)F                                        | -9.54  | 42.55 | 2.96 | P | IN  |
| QL02966 | 1,1,1,2,2,3,3,4,4,13,13,14,14,15,15,16,16-Octadecafluoro-6,11-diiodohexadecane                                 | 13105-46-9   | FC(F)(F)C(F)(F)C(F)(F)C(F)(F)C(CI)CCCC(I)CC(F)(F)C(F)(F)C(F)(F)F                                        | -9.48  | 40.00 | 3.00 | P | IN  |
| QL02967 | 1 OH-substituted n2 fluorotelomer sulfonic acids, n=4<br>Dichloromethyl(3,3,4,4,5,5,6,6-nonafluorohexyl)silane | 38436-16-7   | FC(F)(F)C(F)(F)C(F)(F)C(F)(F)CC(O)(S(=O)(O)=O)                                                          | -7.18  | 36.00 | 2.17 | P | IN  |
| QL02968 |                                                                                                                |              | FC(F)(F)C(F)(F)C(F)(F)C(F)(F)CC[SiH2]C(C)Cl                                                             | -7.85  | 42.31 | 2.27 | P | IN  |
| QL02969 | Bromotris(3,3,4,4,5,5,6,6-nonafluorohexyl)stannane                                                             | 240497-37-4  | FC(F)(F)C(F)(F)C(F)(F)C(F)(F)C(C[Sn])(CCC(F)(F)C(F)(F)C(F)(F)C(F)(F)CCC(F)(F)C(F)(F)C(F)(F)C(F)(F)F     | -9.38  | 47.46 | 2.75 | P | IN  |
| QL02970 | Tris(3,3,4,4,5,5,6,6-nonafluorohexyl)(phenyl)stannane                                                          | 240497-36-3  | FC(F)(F)C(F)(F)C(F)(F)C(F)(F)C(C[Sn])(CCC(F)(F)C(F)(F)C(F)(F)C(F)(F)F)(CCC(F)(F)C(F)(F)C(F)(F)C(F)(F)F) | -8.96  | 39.13 | 2.82 | P | IN  |
| QL02971 | Tris(3,3,4,4,5,5,6,6-nonafluorohexyl)(prop-2-en-1-yl)stannane                                                  | 215186-99-5  | FC(F)(F)C(F)(F)C(F)(F)C(F)(F)C(C[Sn])(CCC(F)(F)C(F)(F)C(F)(F)C(F)(F)F)(CC(F)(F)C(F)(F)C(F)(F)C(F)(F)F)  | -9.04  | 40.91 | 2.80 | P | IN  |
| QL02972 | Tris(3,3,4,4,5,5,6,6-nonafluorohexyl)stannane                                                                  | 240497-26-1  | FC(F)(F)C(F)(F)C(F)(F)C(F)(F)C(C[Sn])(CCC(F)(F)C(F)(F)C(F)(F)C(F)(F)F)(CCC(F)(F)C(F)(F)C(F)(F)C(F)(F)F) | -9.21  | 45.76 | 2.73 | P | IN  |
| QL02973 | 4,4,5,5,6,6,7,7,7-Nonafluorohept-1-ene<br>([12]-4,4,5,5,6,6,7,7,7-Nonafluorohept-1-en-1-yl)benzene             | 129846-67-9  | FC(F)(F)C(F)(F)C(F)(F)C(F)(F)CC=C                                                                       | -7.01  | 42.86 | 1.91 | P | IN  |
| QL02974 |                                                                                                                | 97041-10-6   | FC(F)(F)C(F)(F)C(F)(F)C(F)(F)CC=C/c1ccccc1                                                              | -7.51  | 29.03 | 2.49 | P | OUT |
| QL02975 | 2-(2,2,3,3,4,4,5,5-Nonafluoropentyl)oxirane                                                                    | 81190-28-5   | FC(F)(F)C(F)(F)C(F)(F)C(F)(F)CC1CO1                                                                     | -6.87  | 40.91 | 1.90 | P | IN  |
| QL02976 | 4-(2,2,3,3,4,4,5,5,5-Nonafluoropentyl)-1,3-dioxolan-2-one                                                      | 912364-40-0  | FC(F)(F)C(F)(F)C(F)(F)C(F)(F)CC1COC(=O)O1                                                               | -7.41  | 36.00 | 2.26 | P | IN  |
| QL02977 | 1H,1H,2H,2H-Perfluorohexyl bromide                                                                             | 38436-14-5   | FC(F)(F)C(F)(F)C(F)(F)C(F)(F)CBr                                                                        | -7.49  | 50.00 | 1.91 | P | IN  |
| QL02978 | 1-[[4,4,5,5,6,6,7,7,7-Nonafluoroheptanoyl]oxy]pyrrolidine-2,5-dione                                            | 852527-43-6  | FC(F)(F)C(F)(F)C(F)(F)C(F)(F)CCC(=O)ON1C(=O)CCC1=O                                                      | -7.28  | 27.27 | 2.45 | P | OUT |
| QL02979 | 1,1,1,2,2,3,3,4,4,5,5,6,6,7,7,8,8,11,11,12,12,13,13,14,14,14-Hexacosafuorotetradecane                          | 53638-09-8   | FC(F)(F)C(F)(F)C(F)(F)C(F)(F)C(C)C(F)(F)C(F)(F)C(F)(F)C(F)(F)C(F)(F)C(F)(F)C(F)(F)F                     | -10.59 | 59.09 | 2.93 | P | OUT |
| QL02980 | Decane, 1,1,1,2,2,3,3,4,4,7,7,8,8,9,9,10,10,10-octadecafluoro-                                                 | 142083-52-1  | FC(F)(F)C(F)(F)C(F)(F)C(F)(F)C(C)C(F)(F)C(F)(F)C(F)(F)C(F)(F)F                                          | -9.23  | 56.25 | 2.45 | P | IN  |
| QL02981 | 1,1,1,2,2,3,3,4,4-Nonafluoro-7,7-diisocyanatoheptane                                                           | 306976-22-7  | FC(F)(F)C(F)(F)C(F)(F)C(F)(F)C(C)C(N=C=O)N=C=O                                                          | -7.62  | 33.33 | 2.42 | P | IN  |
| QL02982 | 4,4,5,5,6,6,7,7,7-Nonafluoroheptanenitrile                                                                     | 26649-23-0   | FC(F)(F)C(F)(F)C(F)(F)C(F)(F)C(C)C#N                                                                    | -7.73  | 42.86 | 2.21 | P | IN  |
| QL02983 | 1-[[[4-(2-(Perfluorobutyl)-1-ethyl)phenyl]methoxy]carbonyl]oxy]-2,5-pyrrolidinedione                           | 825635-46-9  | FC(F)(F)C(F)(F)C(F)(F)C(F)(F)CCC1=CC=C(COC(=O)ON2C(=O)CCC2=O)C=C1                                       | -8.11  | 19.15 | 3.02 | P | OUT |
| QL02984 | 8-Bromo-1,1,1,2,2,3,3,4,4-nonafluorooctane                                                                     | 38436-18-9   | FC(F)(F)C(F)(F)C(F)(F)C(F)(F)C(C)CCBr                                                                   | -7.62  | 38.46 | 2.28 | P | IN  |
| QL02985 | 10-Bromo-1,1,1,2,2,3,3,4,4-nonafluorodecane                                                                    | 457603-91-7  | FC(F)(F)C(F)(F)C(F)(F)C(F)(F)C(C)CCCCCBr                                                                | -7.72  | 31.25 | 2.52 | P | IN  |
| QL02986 | 1,1,1,2,2,3,3,4,4,11,11,12,12,13,13,14,14,14-Octadecafluorotetradecane                                         | 1835252-03-3 | FC(F)(F)C(F)(F)C(F)(F)C(F)(F)CCCCC(F)(F)C(F)(F)C(F)(F)F                                                 | -9.07  | 40.91 | 2.81 | P | IN  |
| QL02987 | 1,1,1,2,2,3,3,4,4,13,13,14,14,15,15,16,16,16-Octadecafluorohexadecane                                          | 1835252-00-0 | FC(F)(F)C(F)(F)C(F)(F)C(F)(F)CCCCCCCC(F)(F)C(F)(F)C(F)(F)F                                              | -9.13  | 36.00 | 2.97 | P | IN  |
| QL02988 | 12,12,13,13,14,14,15,15,15-Nonafluoropentadecanoyl chloride                                                    | 118624-68-3  | FC(F)(F)C(F)(F)C(F)(F)C(F)(F)CCCCCCCCC(Cl)=O                                                            | -8.30  | 21.74 | 3.02 | P | OUT |
| QL02989 | 1,1,1,2,2,3,3,4,4,15,15,16,16,17,17,18,18-Octadecafluorooctadecane                                             | 1835251-99-4 | FC(F)(F)C(F)(F)C(F)(F)C(F)(F)CCCCCCCCC(F)(F)C(F)(F)C(F)(F)F                                             | -9.22  | 32.14 | 3.11 | P | OUT |
| QL02990 | 15-Bromo-1,1,1,2,2,3,3,4,4-nonafluoropentadecane                                                               | 213207-95-5  | FC(F)(F)C(F)(F)C(F)(F)C(F)(F)C(C)CCCCCCCCCBr                                                            | -8.32  | 21.28 | 3.04 | P | OUT |
| QL02991 | 1,1,1,2,2,3,3,4,4-Nonafluoro-8-iodooctane                                                                      | 99324-98-8   | FC(F)(F)C(F)(F)C(F)(F)C(F)(F)C(C)CI                                                                     | -7.62  | 38.46 | 2.28 | P | IN  |
| QL02992 | 4,4,5,5,6,6,7,7,7-Nonafluoroheptyl iodide                                                                      | 183547-74-2  | FC(F)(F)C(F)(F)C(F)(F)C(F)(F)C(C)CI                                                                     | -7.77  | 43.48 | 2.21 | P | IN  |
| QL02993 | 4,4,5,5,6,6,7,7,7-Nonafluoroheptyl prop-2-enoate                                                               | 443145-46-8  | FC(F)(F)C(F)(F)C(F)(F)C(F)(F)C(COC(=O)C)=C                                                              | -7.60  | 30.00 | 2.51 | P | IN  |
| QL02994 | 4,4,5,5,6,6,7,7,7-Nonafluoroheptyl carbonochloridate                                                           | 821806-42-2  | FC(F)(F)C(F)(F)C(F)(F)C(F)(F)C(COC(Cl)=O)                                                               | -8.01  | 38.46 | 2.44 | P | IN  |
| QL02995 | (3,3,4,4,5,5,6,6-Nonafluorohexyl)carbonimidoyl                                                                 | 142030-27-1  | FC(F)(F)C(F)(F)C(F)(F)C(F)(F)CCN=C(Cl)Cl                                                                | -8.22  | 47.83 | 2.27 | P | IN  |
| QL02996 | Bis(3,3,4,4,5,5,6,6-nonafluorohexyl) butanedioate                                                              | 508194-70-5  | FC(F)(F)C(F)(F)C(F)(F)C(F)(F)C(COC(=O)OCC(=O)OCC(F)(F)C(F)(F)C(F)(F)F)                                  | -9.55  | 36.00 | 3.14 | P | IN  |
| QL02997 | bis(Perfluorobutyl)ethyl carbonate                                                                             | 1132677-78-1 | FC(F)(F)C(F)(F)C(F)(F)C(F)(F)C(COC(=O)OCC(F)(F)C(F)(F)C(F)(F)F)                                         | -9.53  | 42.86 | 2.95 | P | IN  |
| QL02998 | 3,3,4,4,5,5,6,6-Nonafluorohexyl carbonochloridate                                                              | 40678-17-9   | FC(F)(F)C(F)(F)C(F)(F)C(F)(F)C(COC(Cl)=O)                                                               | -7.93  | 43.48 | 2.27 | P | IN  |
| QL02999 | 6-(Ethenyloxy)-1,1,1,2,2,3,3,4,4-nonafluorohexane                                                              | 63391-84-4   | FC(F)(F)C(F)(F)C(F)(F)C(F)(F)CCOC=C                                                                     | -7.46  | 36.00 | 2.28 | P | IN  |
| QL03000 | 3,3,4,4,5,5,6,6-Nonafluorohexyl formate                                                                        | 78689-20-0   | FC(F)(F)C(F)(F)C(F)(F)C(F)(F)CCOC=O                                                                     | -7.67  | 39.13 | 2.28 | P | IN  |
| QL03001 | 1,1,1,2,2,3,3,4,4-Nonafluoro-6-[(prop-2-en-1-yl)oxy]hexane                                                     | 188298-09-1  | FC(F)(F)C(F)(F)C(F)(F)C(F)(F)CCOCC=C                                                                    | -7.63  | 32.14 | 2.46 | P | IN  |
| QL03002 | 2-[(3,3,4,4,5,5,6,6-Nonafluorohexyl)oxy]methyl)oxirane                                                         | 384828-82-4  | FC(F)(F)C(F)(F)C(F)(F)C(F)(F)CCOCC1CO1                                                                  | -7.51  | 31.03 | 2.44 | P | IN  |
| QL03003 | 3-[[3,3,4,4,5,5,6,6-Nonafluorohexyl)oxy]propanenitrile                                                         | 56300-32-4   | FC(F)(F)C(F)(F)C(F)(F)C(F)(F)CCOCC#N                                                                    | -7.78  | 32.14 | 2.52 | P | IN  |
| QL03004 | Tris(1H,1H,2H,2H-perfluorohexyl) phosphate                                                                     | 1887067-55-1 | FC(F)(F)C(F)(F)C(F)(F)C(F)(F)C(COP(=O)(OCC(F)(F)C(F)(F)C(F)(F)C(F)(F)OCC(F)(F)C(F)(F)C(F)(F)F)          | -9.51  | 43.55 | 2.92 | P | IN  |
| QL03005 | 3,3,4,4,5,5,6,6-Nonafluorohexyl trifluoromethanesulfonate                                                      | 171182-86-8  | FC(F)(F)C(F)(F)C(F)(F)C(F)(F)CCOS(=O)(=O)C(F)(F)F                                                       | -8.29  | 44.44 | 2.39 | P | IN  |
| QL03006 | 3,3,4,4,5,5,6,6-Nonafluoro-1-hexanethiol                                                                       | 68140-20-5   | FC(F)(F)C(F)(F)C(F)(F)C(F)(F)CCS                                                                        | -7.01  | 42.86 | 1.91 | P | IN  |
| QL03007 | n2 fluorotelomer sulfonyl propano-amido alkyl sulfonic acids, n=2                                              |              | FC(F)(F)C(F)(F)C(F)(F)C(F)(F)CCS(CCC(NC(C)(C)CS(O)(=O)=O)(=O)=O)                                        | -7.76  | 18.37 | 2.90 | P | OUT |
| QL03008 | n2 fluorotelomer thioamido sulfonic acids, n=2                                                                 |              | FC(F)(F)C(F)(F)C(F)(F)C(F)(F)CCS(CCC(NC(C)(C)CS(O)(=O)=O)(=O)=O)                                        | -7.77  | 18.75 | 2.89 | P | OUT |
| QL03009 | n2 fluorotelomer sulfonyl propanoic acids, n=2                                                                 |              | FC(F)(F)C(F)(F)C(F)(F)C(F)(F)CCS(CCC(O)=O)(=O)=O                                                        | -7.40  | 28.13 | 2.47 | P | OUT |



|         |                                                                                                          |              |                                                                                  |        |       |      |   |     |
|---------|----------------------------------------------------------------------------------------------------------|--------------|----------------------------------------------------------------------------------|--------|-------|------|---|-----|
| QL03010 | n2 fluorotelomer sulfonamido betaine-related, n=2                                                        |              | FC(F)(F)C(F)(F)C(F)(F)C(F)(F)CCS(NCCC[N+](CC(O)=O)(C)C(=O)=O)                    | -7.74  | 18.37 | 2.89 | P | OUT |
| QL03011 | 3,3,4,4,5,5,6,6-Nonafluorohexyl thiocyanate                                                              | 26650-08-8   | FC(F)(F)C(F)(F)C(F)(F)C(F)(F)CCSC#N                                              | -7.79  | 40.91 | 2.28 | P | IN  |
| QL03012 | n2 fluorotelomer thio alkyl amido betaine-related, n=2                                                   |              | FC(F)(F)C(F)(F)C(F)(F)C(F)(F)CCSCC(NCCC[N+](C)(C)CC(O)=O)=O                      | -8.05  | 17.31 | 3.04 | P | OUT |
| QL03013 | n2 fluorotelomer thio alkyl amido ammonium, n=2                                                          |              | FC(F)(F)C(F)(F)C(F)(F)C(F)(F)CCSCC(NCCC[N+](C)(C)CC(O)=O)=O                      | -7.92  | 20.00 | 2.92 | P | OUT |
| QL03014 | n2 fluorotelomer thio alkyl amido sulfonic acids, n=2                                                    |              | FC(F)(F)C(F)(F)C(F)(F)C(F)(F)CCSCCC(NC(C)(C)CS(O)=O)=O                           | -7.74  | 19.15 | 2.87 | P | OUT |
| QL03015 | 1-Iodo-1H-nonafluoropentane                                                                              | 2253-14-7    | FC(F)(F)C(F)(F)C(F)(F)C(F)CI                                                     | -7.84  | 58.82 | 1.81 | P | IN  |
| QL03016 | 1-Chlorononafluorobutane                                                                                 | 558-89-4     | FC(F)(F)C(F)(F)C(F)(F)C(F)Cl                                                     | -7.82  | 71.43 | 1.45 | P | OUT |
| QL03017 | 2,2,3,3,4,4,5,5,5-Nonafluoropentyl acrylate                                                              | 308-26-9     | FC(F)(F)C(F)(F)C(F)(F)C(F)(F)COC(=O)C=C                                          | -7.53  | 37.50 | 2.27 | P | IN  |
| QL03018 | 1,1,1,2,2,3,3,4,4-Nonafluoro-5-[(prop-2-en-1-yl)oxy]pentane                                              | 646063-05-0  | FC(F)(F)C(F)(F)C(F)(F)C(F)(F)COCC=C                                              | -7.46  | 36.00 | 2.28 | P | IN  |
| QL03019 | 5-[2-(Ethenyloxy)ethoxy]-1,1,1,2,2,3,3,4,4-nonafluoropentane                                             | 572911-07-0  | FC(F)(F)C(F)(F)C(F)(F)C(F)(F)COCCOC=C                                            | -7.71  | 31.03 | 2.52 | P | IN  |
| QL03020 | Perfluorobutane                                                                                          | 355-25-9     | FC(F)(F)C(F)(F)C(F)(F)C(F)F                                                      | -7.82  | 71.43 | 1.45 | P | OUT |
| QL03021 | Perfluoro-2-butyl-3-propyloxaziridine                                                                    | 143813-70-1  | FC(F)(F)C(F)(F)C(F)(F)C(F)(F)N1OC1(F)C(F)(F)C(F)(F)F                             | -9.62  | 62.96 | 2.43 | P | IN  |
| QL03022 | Nonafluorobutyl prop-2-enoate                                                                            | 2708-03-4    | FC(F)(F)C(F)(F)C(F)(F)C(F)(F)OC(=O)C=C                                           | -7.70  | 42.86 | 2.19 | P | IN  |
| QL03023 | ether-substituted perfluoroalkyl (linear) caboxylic acids_i, n=4                                         |              | FC(F)(F)C(F)(F)C(F)(F)C(F)(F)OC(F)(F)C(F)C(O)=O                                  | -8.26  | 54.17 | 2.11 | P | IN  |
| QL03024 | Ether, bis(nonafluorobutyl)                                                                              | 308-48-5     | FC(F)(F)C(F)(F)C(F)(F)C(F)(F)OC(F)(F)C(F)(F)C(F)(F)F                             | -9.77  | 66.67 | 2.38 | P | IN  |
| QL03025 | 1-Bromoperfluoro-2,5,8-trioxadodecane                                                                    | 330562-47-5  | FC(F)(F)C(F)(F)C(F)(F)C(F)(F)C(F)(F)OC(F)(F)C(F)(F)OC(F)(F)Br                    | -10.22 | 62.50 | 2.69 | P | OUT |
| QL03026 | 4-Pyridinecarboxamide, N-[4-(nonafluorobutoxy)phenyl]-                                                   | 62315-14-4   | FC(F)(F)C(F)(F)C(F)(F)C(F)(F)OC1=CC=C(NC(=O)C2=CC=NC=C2)C=C1                     | -8.13  | 23.68 | 2.90 | P | OUT |
| QL03027 | 3-Pyridinecarboxamide, N-[4-(nonafluorobutoxy)phenyl]-                                                   | 62315-07-5   | FC(F)(F)C(F)(F)C(F)(F)C(F)(F)OC1=CC=C(NC(=O)C2=CC=NC=C2)C=C1                     | -8.13  | 23.68 | 2.90 | P | OUT |
| QL03028 | Tris(nonafluorobutyl)(oxo)-lambda^5~-phosphane                                                           | 58431-34-8   | FC(F)(F)C(F)(F)C(F)(F)C(F)(F)P(=O)(C(F)(F)C(F)(F)C(F)(F)C(F)(F)F)C(F)(F)C(F)(F)F | -9.70  | 65.85 | 2.38 | P | IN  |
| QL03029 | Phosphorane, difluorotris(nonafluorobutyl)-[5-(1,1,2,2,3,3,4,4,4-Nonafluorobutane-1-yl)sulfonyl]benzene  | 91543-34-9   | FC(F)(F)C(F)(F)C(F)(F)C(F)(F)P(F)(F)C(F)(F)C(F)(F)C(F)(F)C(F)(F)C(F)(F)C(F)(F)F  | -9.97  | 69.05 | 2.40 | P | IN  |
| QL03030 | N-[(4-Bromophenyl)(perfluorobutyl)oxido-4-4-sulfanylidene]-1,1,1-trifluoromethanesulfonamide             | 1335014-68-0 | FC(F)(F)C(F)(F)C(F)(F)C(F)(F)F(S(=O)(=O)N(=O)=O)C1=CCCCC1                        | -7.11  | 32.14 | 2.24 | P | IN  |
| QL03031 | bis(Perfluorobutylsulfonyl)methylenephenyliodine                                                         | 1421133-01-8 | FC(F)(F)C(F)(F)C(F)(F)C(F)(F)F(S(=O)(=O)N(=O)=O)C(F)(F)C1=CC=C(Br)C=C1           | -7.90  | 38.24 | 2.40 | P | IN  |
| QL03032 | 1-[Bis(1,1,2,2,3,3,4,4,4-nonafluorobutane-1-sulfonyl)methanesulfonyl]-1,1,2,2,3,3,4,4,4-nonafluorobutane | 681477-42-9  | FC(F)(F)C(F)(F)C(F)(F)C(F)(F)F(S(=O)(=O)N(=O)=O)C(F)(F)C(F)(F)C(F)(F)F           | -8.73  | 42.22 | 2.63 | P | IN  |
| QL03033 | [(1,1,2,2,3,3,4,4,4-Nonafluorobutane-1-sulfonyl)ethynyl]benzene                                          | 182505-69-7  | FC(F)(F)C(F)(F)C(F)(F)C(F)(F)F(S(=O)(=O)N(=O)=O)C(F)(F)C(F)(F)C(F)(F)F           | -9.46  | 54.00 | 2.61 | P | IN  |
| QL03034 | 2-(1,1,2,2,3,3,4,4,4-Nonafluorobutane-1-sulfonyl)-1-phenylethan-1-one                                    | 63369-94-8   | FC(F)(F)C(F)(F)C(F)(F)C(F)(F)F(S(=O)(=O)N(=O)=O)C(F)(F)C(F)(F)C(F)(F)F           | -7.74  | 31.03 | 2.53 | P | IN  |
| QL03035 | [(1,1,2,2,3,3,4,4,4-Nonafluorobutane-1-sulfonyl)methyl]benzene                                           | 58510-75-1   | FC(F)(F)C(F)(F)C(F)(F)C(F)(F)F(S(=O)(=O)N(=O)=O)CC(=O)C1=CC=CC=C1                | -7.53  | 28.13 | 2.53 | P | OUT |
| QL03036 | 1,1,1,2,2,3,3,4,4-Nonafluoro-4-[(1,1,2,2,3,3,4,4,4-nonafluorobutane-1-sulfonyl)methanesulfonyl]butane    | 879081-10-4  | FC(F)(F)C(F)(F)C(F)(F)C(F)(F)F(S(=O)(=O)N(=O)=O)CC1CCCCC1                        | -7.51  | 30.00 | 2.47 | P | IN  |
| QL03037 | N-[(4-Bromophenyl)oxido(trifluoromethyl)sulfanylidene]perfluorobutanesulfonamide                         | 29214-37-7   | FC(F)(F)C(F)(F)C(F)(F)C(F)(F)F(S(=O)(=O)N(=O)=O)C(F)(F)C(F)(F)C(F)(F)F           | -9.35  | 51.43 | 2.63 | P | IN  |
| QL03038 | 1-{(1,1,2,2,3,3,4,4,4-Nonafluorobutane-1-sulfonyl)-1H-benzotriazole                                      | 1421133-00-7 | FC(F)(F)C(F)(F)C(F)(F)C(F)(F)F(S(=O)(=O)N(=O)=O)C1=CC=C(Br)C=C1)C(F)(F)F         | -8.39  | 38.24 | 2.60 | P | IN  |
| QL03039 | N-(1,1,2,2,3,3,4,4,4-Nonafluorobutane-1-sulfonyl)cyclopent-2-ene-1-carboxamide                           | 681443-29-8  | FC(F)(F)C(F)(F)C(F)(F)C(F)(F)F(S(=O)(=O)N(=O)=O)C1=CC=CC=C1                      | -7.54  | 31.03 | 2.45 | P | IN  |
| QL03040 | N-(1,1,2,2,3,3,4,4,4-Nonafluorobutane-1-sulfonyl)cyclopentanecarboxamide                                 | 1440968-24-0 | FC(F)(F)C(F)(F)C(F)(F)C(F)(F)F(S(=O)(=O)N(=O)=O)C1=CC=CC=C1                      | -7.38  | 28.13 | 2.47 | P | OUT |
| QL03041 | N-(1,1,2,2,3,3,4,4,4-Nonafluorobutane-1-sulfonyl)cyclohexanecarboxamide                                  | 1440968-21-7 | FC(F)(F)C(F)(F)C(F)(F)C(F)(F)F(S(=O)(=O)N(=O)=O)C1=CCCCC1                        | -7.27  | 26.47 | 2.47 | P | OUT |
| QL03042 | N-(1,1,2,2,3,3,4,4,4-Nonafluorobutane-1-sulfonyl)cyclohexanecarboxamide                                  | 1440968-37-5 | FC(F)(F)C(F)(F)C(F)(F)C(F)(F)F(S(=O)(=O)N(=O)=O)C1=CCCCC1                        | -7.28  | 24.32 | 2.53 | P | OUT |
| QL03043 | N,N'-(3,4-Dioxocyclobut-1-ene-1,2-diyl)bis(1,1,2,2,3,3,4,4,4-nonafluorobutane-1-sulfonamide)             | 1234571-87-9 | FC(F)(F)C(F)(F)C(F)(F)C(F)(F)F(S(=O)(=O)N(=O)=O)C1=CC=CC=C1                      | -9.50  | 42.86 | 2.93 | P | IN  |
| QL03044 | N-Cyclooctyl-1,1,2,2,3,3,4,4,4-nonafluorobutane-1-sulfonamide                                            | 1456900-48-3 | FC(F)(F)C(F)(F)C(F)(F)C(F)(F)F(S(=O)(=O)N(=O)=O)C1=CCCCCCC1                      | -7.12  | 21.95 | 2.53 | P | OUT |
| QL03045 | 1,1,2,2,3,3,4,4,4-nonafluoro-N-[(trifluoromethyl)sulfonyl]-1-Butanesulfonamide                           | 39847-37-5   | FC(F)(F)C(F)(F)C(F)(F)C(F)(F)F(S(=O)(=O)N(=O)=O)C(F)(F)F                         | -8.14  | 48.00 | 2.23 | P | IN  |
| QL03046 | Vinyl nonafluoro-1-butanedisulfonate                                                                     | 42409-05-2   | FC(F)(F)C(F)(F)C(F)(F)C(F)(F)F(S(=O)(=O)N(=O)=O)C=C                              | -7.51  | 40.91 | 2.17 | P | IN  |
| QL03047 | Phenyl nonafluorobutane-1-sulfonate                                                                      | 25628-11-9   | FC(F)(F)C(F)(F)C(F)(F)C(F)(F)F(S(=O)(=O)N(=O)=O)C1=CC=CC=C1                      | -7.66  | 32.14 | 2.47 | P | IN  |
| QL03048 | Cyclopent-1-en-1-yl nonafluorobutane-1-sulfonate                                                         | 36839-94-8   | FC(F)(F)C(F)(F)C(F)(F)C(F)(F)F(S(=O)(=O)N(=O)=O)C1=CC=CC=C1                      | -7.03  | 31.03 | 2.24 | P | IN  |
| QL03049 | Cyclohex-1-en-1-yl nonafluorobutane-1-sulfonate                                                          | 36839-95-9   | FC(F)(F)C(F)(F)C(F)(F)C(F)(F)F(S(=O)(=O)N(=O)=O)C1=CCCCC1                        | -7.39  | 28.13 | 2.47 | P | OUT |
| QL03050 | Cyclohept-1-en-1-yl nonafluorobutane-1-sulfonate                                                         | 42108-79-2   | FC(F)(F)C(F)(F)C(F)(F)C(F)(F)F(S(=O)(=O)N(=O)=O)C1=CCCCC1                        | -7.22  | 25.71 | 2.47 | P | OUT |
| QL03051 | 4-Cyanophenyl nonafluorobutane-1-sulfonate                                                               | 626201-15-8  | FC(F)(F)C(F)(F)C(F)(F)C(F)(F)F(S(=O)(=O)N(=O)=O)C1=CC=CC=C1                      | -8.08  | 31.03 | 2.68 | P | IN  |
| QL03052 | 2,4-Dichlorophenyl nonafluorobutane-1-sulfonate                                                          | 32848-21-8   | FC(F)(F)C(F)(F)C(F)(F)C(F)(F)F(S(=O)(=O)N(=O)=O)C1=CC=CC=C1                      | -8.25  | 39.29 | 2.52 | P | IN  |
| QL03053 | Quinolin-8-yl nonafluorobutane-1-sulfonate                                                               | 41605-60-1   | FC(F)(F)C(F)(F)C(F)(F)C(F)(F)F(S(=O)(=O)N(=O)=O)C1=CC=CC=C1                      | -7.42  | 27.27 | 2.51 | P | OUT |
| QL03054 | 2-Cyanophenyl nonafluorobutane-1-sulfonate                                                               | 873838-37-0  | FC(F)(F)C(F)(F)C(F)(F)C(F)(F)F(S(=O)(=O)N(=O)=O)C1=CC=CC=C1                      | -7.54  | 31.03 | 2.45 | P | IN  |
| QL03055 | 1,2-Ethanediyl bis(perfluorobutanesulfonate)                                                             | 92982-03-1   | FC(F)(F)C(F)(F)C(F)(F)C(F)(F)F(S(=O)(=O)N(=O)=O)C(F)(F)C(F)(F)C(F)(F)F           | -9.44  | 45.00 | 2.85 | P | IN  |



|         |                                                                                                                  |              |                                                                          |        |       |      |   |     |
|---------|------------------------------------------------------------------------------------------------------------------|--------------|--------------------------------------------------------------------------|--------|-------|------|---|-----|
| QL03056 | 2-[(1,1,2,2,3,3,4,4,4-Nonafluorobutane-1-sulfonyl)oxy]-3a,4,7,7a-tetrahydro-1H-4,7-methanoisindole-1,3(2H)-dione | 307531-76-6  | FC(F)(F)C(F)(F)C(F)(F)C(F)(F)S(=O)(=O)ON1C(=O)C2C3CC(C=C3)C2C1=O         | -7.20  | 24.32 | 2.50 | P | OUT |
| QL03057 | 1,1,2,2,3,3,4,4,4-nonafluoro-N-(2-hydroxyethyl)-1-Butanesulfonamide                                              | 34454-99-4   | FC(F)(F)C(F)(F)C(F)(F)C(F)(F)S(=O)(=O)NCCO)=O                            | -7.28  | 34.62 | 2.25 | P | IN  |
| QL03058 | [1-(1,1,2,2,3,3,4,4,4-Nonafluorobutane-1-sulfinyl)ethenyl]benzene                                                | 1606997-41-4 | FC(F)(F)C(F)(F)C(F)(F)C(F)(F)S(=O)C(=C)c1ccccc1                          | -7.47  | 30.00 | 2.45 | P | IN  |
| QL03059 | Perfluoro-1-butanefluoronyl chloride                                                                             | 2991-84-6    | FC(F)(F)C(F)(F)C(F)(F)C(F)(F)S(Cl)=O)=O                                  | -7.81  | 58.82 | 1.79 | P | IN  |
| QL03060 | Perfluorobutanesulfinyl chloride                                                                                 | 41006-41-1   | FC(F)(F)C(F)(F)C(F)(F)C(F)(F)S(Cl)=O                                     | -8.08  | 62.50 | 1.81 | P | IN  |
| QL03061 | Perfluorobutane sulfonamidoacetic acid                                                                           | 347872-22-4  | FC(F)(F)C(F)(F)C(F)(F)C(F)(F)S(NCC(=O)O)=O)=O                            | -7.37  | 36.00 | 2.24 | P | IN  |
| QL03062 | Perfluoroalkyl (linear) sulfinate, n=4                                                                           | 34642-43-8   | FC(F)(F)C(F)(F)C(F)(F)C(F)(F)S(O)=O                                      | -7.44  | 52.94 | 1.81 | P | IN  |
| QL03063 | [(Nonafluorobutyl)disulfonyl]benzene                                                                             | 1606997-42-5 | FC(F)(F)C(F)(F)C(F)(F)C(F)(F)SSc1ccccc1                                  | -7.72  | 34.62 | 2.43 | P | IN  |
| QL03064 | 1,1,1,2,2,3,3,4,5,5,5-Undecafluoro-4-iodopentane                                                                 | 68158-13-4   | FC(F)(F)C(F)(F)C(F)(F)C(F)(F)I                                           | -8.60  | 70.59 | 1.79 | P | OUT |
| QL03065 | 1,1,1,2,2,3,3,5,5,5-Decafluoro-4-iodo-4-(trifluoromethyl)pentane                                                 | 102780-88-1  | FC(F)(F)C(F)(F)C(F)(F)C(F)(F)C(F)(F)F                                    | -8.38  | 70.00 | 1.72 | P | OUT |
| QL03066 | 1-ethoxy-2,2,3,3,4,4,4-heptafluorobutan-1-ol                                                                     | 356-26-3     | FC(F)(F)C(F)(F)C(F)(F)C(F)(F)OCC                                         | -6.33  | 31.82 | 1.93 | P | IN  |
| QL03067 | 2,2,3,3,4,4,4-Heptafluoro-1-phenylbutyl diphenyl phosphate                                                       | 98010-21-0   | FC(F)(F)C(F)(F)C(F)(F)C(F)(F)C(OP(=O)(Oc1ccccc1)Oc1ccccc1)c1ccccc1       | -6.32  | 14.00 | 2.42 | P | OUT |
| QL03068 | 3,3,4,4,5,5,5-heptafluoropent-1-yne                                                                              | 80337-25-3   | FC(F)(F)C(F)(F)C(F)(F)C(F)(F)C#C                                         | -6.66  | 53.85 | 1.46 | P | IN  |
| QL03069 | 4,4,5,5,6,6,6-Heptafluoro-1-phenylhex-2-yn-1-one                                                                 | 89965-72-0   | FC(F)(F)C(F)(F)C(F)(F)C(F)(F)C#CC(=O)C1=CC=CC=C1                         | -7.26  | 28.00 | 2.42 | P | OUT |
| QL03070 | (3,3,4,4,5,5,5-Heptafluoropent-1-yn-1-yl)benzene                                                                 | 81674-08-0   | FC(F)(F)C(F)(F)C(F)(F)C(F)(F)C#Cc1ccccc1                                 | -6.92  | 30.43 | 2.21 | P | IN  |
| QL03071 | Heptafluorobutyronitrile                                                                                         | 375-00-8     | FC(F)(F)C(F)(F)C(F)(F)C#N                                                | -6.96  | 58.33 | 1.46 | P | IN  |
| QL03072 | 3,3,4,4,5,5,5-heptafluoropent-1-ene                                                                              | 355-08-8     | FC(F)(F)C(F)(F)C(F)(F)C=C                                                | -6.18  | 46.67 | 1.46 | P | IN  |
| QL03073 | 3-(2,2,3,3,4,4,4-Heptafluorobutylidene)oxolan-2-one                                                              | 89608-45-7   | FC(F)(F)C(F)(F)C(F)(F)C(=O)C1COC1=O                                      | -6.26  | 31.82 | 1.90 | P | IN  |
| QL03074 | 4,4,5,5,6,6,6-Heptafluoro-1-phenylhex-2-en-1-one                                                                 | 110960-47-9  | FC(F)(F)C(F)(F)C(F)(F)C(=O)C1=CC=CC=C1                                   | -7.12  | 25.93 | 2.42 | P | OUT |
| QL03075 | 1,1,1,2,2,3,3,6,6,7,7,8,8,9,9,10,10,11,11-icosaflluoroundec-4-ene                                                | 100603-63-2  | FC(F)(F)C(F)(F)C(F)(F)C=CC(F)(F)C(F)(F)C(F)(F)C(F)(F)C(F)(F)C(F)(F)F     | -10.08 | 60.61 | 2.68 | P | OUT |
| QL03076 | 1,1,1,2,2,3,3,6,6,7,7,8,8,9,9,10,10,10-Octadecafluorodec-4-ene                                                   | 935477-16-0  | FC(F)(F)C(F)(F)C(F)(F)C=CC(F)(F)C(F)(F)C(F)(F)C(F)(F)C(F)(F)F            | -9.61  | 60.00 | 2.50 | P | IN  |
| QL03077 | 1,1,1,2,2,3,3,6,6,7,7,8,8,9,9,9-Hexadecafluoronon-4-ene                                                          | 935477-07-9  | FC(F)(F)C(F)(F)C(F)(F)C=CC(F)(F)C(F)(F)C(F)(F)C(F)(F)F                   | -9.27  | 59.26 | 2.38 | P | IN  |
| QL03078 | 1,1,1,2,2,3,3,6,6,7,7,8,8,8-Tetradecafluorooct-4-ene                                                             | 3910-82-5    | FC(F)(F)C(F)(F)C(F)(F)C=CC(F)(F)C(F)(F)C(F)(F)F                          | -8.67  | 58.33 | 2.16 | P | IN  |
| QL03080 | 3,3,4,4,5,5,5-Heptafluoro-1-iodo-1-pentene                                                                       | 376-97-6     | FC(F)(F)C(F)(F)C(F)(F)C=CI                                               | -7.59  | 53.33 | 1.85 | P | IN  |
| QL03082 | (1E)-2,2,3,3,4,4,4-Heptafluoro-N-phenylbutan-1-imine                                                             | 62765-24-6   | FC(F)(F)C(F)(F)C(F)(F)C=NC1=CC=CC=C1                                     | -6.83  | 29.17 | 2.21 | P | IN  |
| QL03083 | (1E)-2,2,3,3,4,4,4-Heptafluoro-N-(2-phenylethyl)butan-1-imine                                                    | 29723-32-8   | FC(F)(F)C(F)(F)C(F)(F)C=NC1C=CC=CC=C1                                    | -7.04  | 23.33 | 2.46 | P | OUT |
| QL03084 | Perfluorobutylaldehyde                                                                                           | 375-02-0     | FC(F)(F)C(F)(F)C(F)(F)C=O                                                | -6.66  | 53.85 | 1.46 | P | IN  |
| QL03085 | Undecafluoro(heptafluoropropyl)cyclohexane                                                                       | 374-59-4     | FC(F)(F)C(F)(F)C(F)(F)C1(F)C(F)(F)C(F)(F)C(F)(F)C1(F)F                   | -9.04  | 66.67 | 2.08 | P | IN  |
| QL03086 | 2,2,3,3,4,4,5,6,6-Nonafluoro-5-(heptafluoropropyl)oxane                                                          | 801-26-3     | FC(F)(F)C(F)(F)C(F)(F)C1(F)C(F)(F)OC(F)(F)C(F)(F)C1(F)F                  | -8.90  | 64.00 | 2.10 | P | IN  |
| QL03087 | 3,4,4-Trifluoro-3-(heptafluoropropyl)-1,2lambda~6~-oxathietane-2,2-dione                                         | 156465-44-0  | FC(F)(F)C(F)(F)C(F)(F)C1(F)C(F)(F)OS1(=O)=O                              | -7.28  | 52.63 | 1.75 | P | IN  |
| QL03088 | 2,2,3,3,4,4,5,6-Nonafluoro-6-(heptafluoropropyl)tetrahydro-2H-pyran                                              | 335-35-3     | FC(F)(F)C(F)(F)C(F)(F)C1(F)OC(F)(F)C(F)(F)C1(F)F                         | -8.93  | 64.00 | 2.11 | P | IN  |
| QL03089 | 2,2,3,3,4,4,5-Heptafluoro-5-(heptafluoropropyl)oxolane                                                           | 423-22-3     | FC(F)(F)C(F)(F)C(F)(F)C1(F)OC(F)(F)C(F)(F)C1(F)F                         | -8.34  | 63.64 | 1.88 | P | IN  |
| QL03090 | 2,2,3-Trifluoro-3-(heptafluoropropyl)oxirane                                                                     | 74942-19-1   | FC(F)(F)C(F)(F)C(F)(F)C1(F)OC1(F)F                                       | -8.08  | 62.50 | 1.81 | P | IN  |
| QL03091 | 1,4-Bis(chloromethyl)-2-(heptafluoropropyl)benzene                                                               | 139263-35-7  | FC(F)(F)C(F)(F)C(F)(F)C1=C(CCl)C=CC(CCl)=C1                              | -6.92  | 33.33 | 2.13 | P | IN  |
| QL03092 | 5-(Heptafluoropropyl)-3-phenyl-1H-pyrazole                                                                       | 54864-78-7   | FC(F)(F)C(F)(F)C(F)(F)C1=CC(=NN1)C1=CC=CC=C1                             | -7.08  | 25.00 | 2.43 | P | OUT |
| QL03093 | 6-(Heptafluoropropyl)-2-sulfanylidene-2,3-dihydropyrimidin-4(1H)-one                                             | 88191-88-2   | FC(F)(F)C(F)(F)C(F)(F)C1=CC(=O)NC(=S)N1                                  | -6.37  | 33.33 | 1.91 | P | IN  |
| QL03094 | 1-Bromo-3-(heptafluoropropyl)benzene                                                                             | 53104-06-6   | FC(F)(F)C(F)(F)C(F)(F)C1=CC(Br)=CC=C1                                    | -6.72  | 38.10 | 1.92 | P | IN  |
| QL03095 | 2-[(4-(Heptafluoropropyl)phenyl)methyl]oxirane                                                                   | 144006-68-8  | FC(F)(F)C(F)(F)C(F)(F)C1=CC=C(C(C2CO2)C=C1                               | -7.20  | 24.14 | 2.50 | P | OUT |
| QL03096 | N-[6-(Heptafluoropropyl)-2-oxo-2H-pyran-3-yl]benzamide                                                           | 860454-18-8  | FC(F)(F)C(F)(F)C(F)(F)C1=CC=C(NC(=O)C2C(=O)C(=O)O1                       | -7.56  | 20.59 | 2.75 | P | OUT |
| QL03097 | Quinoline, 4-(heptafluoropropyl)-                                                                                | 181059-73-4  | FC(F)(F)C(F)(F)C(F)(F)C1=CC=NC2=CC=CC=C2N1                               | -6.49  | 26.92 | 2.13 | P | OUT |
| QL03098 | AC1LC6EI                                                                                                         | 60007-37-6   | FC(F)(F)C(F)(F)C(F)(F)C1=CN(C(=O)NC1=O                                   | -6.97  | 33.33 | 2.16 | P | IN  |
| QL03099 | 5-(Heptafluoropropyl)-2-sulfanylidene-2,3-dihydropyrimidin-4(1H)-one                                             | 145663-11-2  | FC(F)(F)C(F)(F)C(F)(F)C1=CN(C(=S)NC1=O                                   | -6.97  | 33.33 | 2.16 | P | IN  |
| QL03100 | (4S)-4-Benzyl-2-(heptafluoropropyl)-4,5-dihydro-1,3-oxazole                                                      | 1366341-52-7 | FC(F)(F)C(F)(F)C(F)(F)C1=N[C@@H](Cc2ccccc2)CO1                           | -7.08  | 21.88 | 2.52 | P | OUT |
| QL03101 | 2,4,6-Tris(heptafluoropropyl)-1,3,5-triazine                                                                     | 915-76-4     | FC(F)(F)C(F)(F)C(F)(F)C1=NC(=NC(=N1)C(F)(F)C(F)(F)C(F)(F)C(F)(F)C(F)(F)F | -8.83  | 58.33 | 2.23 | P | IN  |
| QL03102 | MLS002694827                                                                                                     | 4314-49-2    | FC(F)(F)C(F)(F)C(F)(F)C1=NC(=O)ON1                                       | -6.94  | 41.18 | 1.92 | P | IN  |
| QL03103 | Benzimidazole, 5(or 6)-chloro-2-(heptafluoropropyl)-                                                             | 6866-58-6    | FC(F)(F)C(F)(F)C(F)(F)C1=NC2=C(N1)C=C(C1)C=C2                            | -7.29  | 33.33 | 2.29 | P | IN  |
| QL03104 | 2-(Heptafluoropropyl)-1H-benzimidazole                                                                           | 559-37-5     | FC(F)(F)C(F)(F)C(F)(F)C1=NC2=CC=CC=C2N1                                  | -6.71  | 29.17 | 2.16 | P | IN  |
| QL03105 | 2-(Perfluoropropyl)benzoxazole                                                                                   | 2008-06-2    | FC(F)(F)C(F)(F)C(F)(F)C1=NC2=CC=CC=C2O1                                  | -6.80  | 30.43 | 2.16 | P | IN  |
| QL03106 | 4-(Heptafluoropropyl)-1,3-dihydro-2H-1,5-benzodiazepin-2-one                                                     | 96146-10-0   | FC(F)(F)C(F)(F)C(F)(F)C1=Nc2ccccc2NC(=O)C1                               | -6.56  | 24.14 | 2.24 | P | OUT |
| QL03107 | 2-(heptafluoropropyl)-4,5-dihydro-1h-imidazole                                                                   | 4472-70-2    | FC(F)(F)C(F)(F)C(F)(F)C1=NCCN1                                           | -6.28  | 35.00 | 1.83 | P | IN  |
| QL03108 | 2-(Heptafluoropropyl)-1-phenyl-4,5-dihydro-1H-imidazole                                                          | 1069085-53-5 | FC(F)(F)C(F)(F)C(F)(F)C1=NCCN1c1ccccc1                                   | -6.55  | 23.33 | 2.26 | P | OUT |



|         |                                                                           |              |                                                              |       |       |      |   |     |
|---------|---------------------------------------------------------------------------|--------------|--------------------------------------------------------------|-------|-------|------|---|-----|
| QL03109 | 1-Benzyl-2-(heptafluoropropyl)-4,5-dihydro-1H-imidazole                   | 1069085-51-3 | FC(F)(F)C(F)(F)C(F)(F)C1=NCCN1Cc1cccc1                       | -6.90 | 21.21 | 2.46 | P | OUT |
| QL03110 | 2-Perfluoropropyl-5-phenyl-1,3,4-oxadiazole                               | 5756-67-2    | FC(F)(F)C(F)(F)C(F)(F)C1=NN=C(O1)C1=CC=CC=C1                 | -7.21 | 26.92 | 2.43 | P | OUT |
| QL03111 | 5-(heptafluoropropyl)-1-phenyl-1h-tetrazole                               | 2712-85-8    | FC(F)(F)C(F)(F)C(F)(F)C1=NN=NN1C1=CC=CC=C1                   | -6.79 | 26.92 | 2.26 | P | OUT |
| QL03112 | 4-Bromo-2-(heptafluoropropyl)pyridine                                     | 1816283-37-0 | FC(F)(F)C(F)(F)C(F)(F)C1cc(Br)ccn1                           | -6.85 | 40.00 | 1.92 | P | IN  |
| QL03113 | 4-Chloro-2-(heptafluoropropyl)pyridine                                    | 1816283-32-5 | FC(F)(F)C(F)(F)C(F)(F)C1cc(Cl)ccn1                           | -6.85 | 40.00 | 1.92 | P | IN  |
| QL03114 | 1-Bromo-4-(heptafluoropropyl)benzene                                      | 117874-91-6  | FC(F)(F)C(F)(F)C(F)(F)C1ccc(Br)cc1                           | -7.36 | 38.10 | 2.18 | P | IN  |
| QL03115 | 5-Bromo-2-(heptafluoropropyl)pyridine                                     | 1816282-96-8 | FC(F)(F)C(F)(F)C(F)(F)C1ccc(Br)cn1                           | -7.49 | 40.00 | 2.18 | P | IN  |
| QL03116 | 1-(Heptafluoropropyl)-4-iodobenzene                                       | 1417885-93-8 | FC(F)(F)C(F)(F)C(F)(F)C1ccc(I)cc1                            | -7.36 | 38.10 | 2.18 | P | IN  |
| QL03117 | N-[5-(Heptafluoropropyl)][1,1'-biphenyl]-2-yl]benzamide                   | 748785-00-4  | FC(F)(F)C(F)(F)C(F)(F)C1ccc(NC(=O)[c2ccccc2]c(c1)-c1ccccc1   | -7.28 | 15.56 | 2.78 | P | OUT |
| QL03118 | 2-(Heptafluoropropyl)quinoline                                            | 57702-79-1   | FC(F)(F)C(F)(F)C(F)(F)C1ccc2ccccc2n1                         | -6.86 | 26.92 | 2.29 | P | OUT |
| QL03119 | 5-(Heptafluoropropyl)isoquinoline-1-carbaldehyde                          | 31181-32-5   | FC(F)(F)C(F)(F)C(F)(F)C1cccc2c(C=O)cccc12                    | -6.63 | 25.00 | 2.24 | P | OUT |
| QL03120 | (Heptafluoropropyl)benzene                                                | 378-98-3     | FC(F)(F)C(F)(F)C(F)(F)C1ccccc1                               | -6.41 | 33.33 | 1.92 | P | IN  |
| QL03121 | 2-(Heptafluoropropyl)cyclohexan-1-one                                     | 61282-91-5   | FC(F)(F)C(F)(F)C(F)(F)C1CCCCC1=O                             | -5.93 | 26.92 | 1.90 | P | OUT |
| QL03122 | 1-(heptafluoropropyl)-2-iodocyclohexane                                   | 2728-75-8    | FC(F)(F)C(F)(F)C(F)(F)C1CCCCC1I                              | -6.11 | 29.63 | 1.90 | P | IN  |
| QL03123 | 3-(Heptafluoropropyl)oxolane                                              | 143837-48-3  | FC(F)(F)C(F)(F)C(F)(F)C1CCOC1                                | -6.07 | 31.82 | 1.83 | P | IN  |
| QL03124 | 5-(Heptafluoropropyl)dihydropyrimidine-2,4(1H,3H)-dione                   | 90715-84-7   | FC(F)(F)C(F)(F)C(F)(F)C1CNC(=O)NC1=O                         | -6.78 | 30.43 | 2.16 | P | IN  |
| QL03125 | 5-(Heptafluoropropyl)pyrimidine                                           | 1354703-21-1 | FC(F)(F)C(F)(F)C(F)(F)C1cnccn1                               | -6.65 | 36.84 | 1.92 | P | IN  |
| QL03126 | 2-(Heptafluoropropyl)oxirane                                              | 51035-20-2   | FC(F)(F)C(F)(F)C(F)(F)C1CO1                                  | -5.99 | 43.75 | 1.46 | P | IN  |
| QL03127 | 5-(Heptafluoropropyl)-1H-pyrrole-2-carbaldehyde                           | 123825-52-5  | FC(F)(F)C(F)(F)C(F)(F)C1Nc(C=O)cc1                           | -7.04 | 33.33 | 2.18 | P | IN  |
| QL03128 | 4,6-Dichloro-2-(heptafluoropropyl)pyrimidine                              | 1023815-51-1 | FC(F)(F)C(F)(F)C(F)(F)C1nc(Cl)cc(Cl)n1                       | -7.31 | 47.37 | 1.91 | P | IN  |
| QL03129 | 2-(Heptafluoropropyl)-1H-indole                                           | 123825-50-3  | FC(F)(F)C(F)(F)C(F)(F)C1nc2ccccc2c1                          | -6.63 | 28.00 | 2.16 | P | OUT |
| QL03130 | 2-(Heptafluoropropyl)-3-phenylquinoxaline                                 | 69492-70-2   | FC(F)(F)C(F)(F)C(F)(F)C1nc2cccc2nc1-c1ccccc1                 | -6.20 | 20.00 | 2.21 | P | OUT |
| QL03131 | 4-Chloro-2-(heptafluoropropyl)pyrimidine                                  | 937676-00-1  | FC(F)(F)C(F)(F)C(F)(F)C1nccc(Cl)n1                           | -6.99 | 42.11 | 1.92 | P | IN  |
| QL03132 | 2-(Heptafluoropropyl)-1H-pyrrole                                          | 118425-75-5  | FC(F)(F)C(F)(F)C(F)(F)C1Nccc1                                | -6.41 | 36.84 | 1.83 | P | IN  |
| QL03133 | 1-(Heptafluoropropyl)isoquinoline                                         | 70414-12-9   | FC(F)(F)C(F)(F)C(F)(F)C1nccc2ccccc12                         | -6.49 | 26.92 | 2.13 | P | OUT |
| QL03134 | 2-(Heptafluoropropyl)pyrimidine                                           | 133391-64-7  | FC(F)(F)C(F)(F)C(F)(F)C1ncccn1                               | -6.65 | 36.84 | 1.92 | P | IN  |
| QL03135 | Imidazolidine, 2-heptafluoropropyl-                                       | 31185-53-2   | FC(F)(F)C(F)(F)C(F)(F)C1NCCN1                                | -6.07 | 31.82 | 1.83 | P | IN  |
| QL03136 | 2-(Heptafluoropropyl)-1H-imidazole                                        | 81769-47-3   | FC(F)(F)C(F)(F)C(F)(F)C1Nccn1                                | -6.54 | 38.89 | 1.83 | P | IN  |
| QL03138 | 4-Bromo-3-(heptafluoropropyl)-5-phenyl-1H-pyrazole                        | 82633-52-1   | FC(F)(F)C(F)(F)C(F)(F)C1Nnc(c1Br):c1ccccc1                   | -7.30 | 28.57 | 2.42 | P | OUT |
| QL03139 | 5-(Heptafluoropropyl)-3-phenyl-1H-1,2,4-triazole                          | 2195-67-7    | FC(F)(F)C(F)(F)C(F)(F)C1Nnc(n1)-c1ccccc1                     | -7.14 | 25.93 | 2.43 | P | OUT |
| QL03140 | 3-(Heptafluoropropyl)-6-(morpholin-4-yl)[1,2,4]triazolo[4,3-b]pyridazine  | 296886-61-8  | FC(F)(F)C(F)(F)C(F)(F)C1nnc2ccc((nn12)N1CCOCC1               | -6.99 | 20.00 | 2.53 | P | OUT |
| QL03141 | 3-(Heptafluoropropyl)-1H-pyrazole                                         | 158148-63-1  | FC(F)(F)C(F)(F)C(F)(F)C1nNcc1                                | -6.54 | 38.89 | 1.83 | P | IN  |
| QL03142 | 2(5H)-Furanone, 5-(heptafluoropropyl)-                                    | 143469-51-6  | FC(F)(F)C(F)(F)C(F)(F)C1O(C=O)C=C1                           | -6.65 | 36.84 | 1.92 | P | IN  |
| QL03143 | 2-(Heptafluoropropyl)-1,3-dioxolane                                       | 109799-66-8  | FC(F)(F)C(F)(F)C(F)(F)C1OCCO1                                | -6.28 | 35.00 | 1.83 | P | IN  |
| QL03144 | Allyl heptafluorobutyrate                                                 | 17165-55-8   | FC(F)(F)C(F)(F)C(F)(F)CC(=O)OC=C                             | -6.96 | 33.33 | 2.15 | P | IN  |
| QL03145 | 1,1,1,2,2,3,3,10,11,11,12,12,12-Tetradecafluoro-5,8-diiodododecane        | 2357-30-4    | FC(F)(F)C(F)(F)C(F)(F)CC(I)C(C)(I)C(F)(F)C(F)(F)C(F)(F)F     | -8.75 | 42.11 | 2.65 | P | IN  |
| QL03146 | 1,1,1,2,2,3,3,11,11,12,12,13,13,13-Tetradecafluoro-5,9-diiodotridecane    | 1644-06-0    | FC(F)(F)C(F)(F)C(F)(F)CC(I)C(C)(I)C(C)(F)(F)C(F)(F)F         | -8.85 | 39.02 | 2.77 | P | IN  |
| QL03147 | Trichloro(3,3,4,4,5,5,5-heptafluoropentyl)silane                          | 866-24-0     | FC(F)(F)C(F)(F)C(F)(F)CC(Si)(Cl)(Cl)Cl                       | -7.49 | 50.00 | 1.91 | P | IN  |
| QL03148 | 3,3,4,4,5,5,5-heptafluoropentanal                                         | 126015-32-5  | FC(F)(F)C(F)(F)C(F)(F)CC=O                                   | -6.94 | 43.75 | 1.85 | P | IN  |
| QL03149 | (2,2,3,3,4,4,4-Heptafluorobutyl)benzene                                   | 81664-99-5   | FC(F)(F)C(F)(F)C(F)(F)C1ccccc1                               | -6.64 | 29.17 | 2.13 | P | IN  |
| QL03150 | 1H,1H-Heptafluorobutyl epoxide                                            | 1765-92-0    | FC(F)(F)C(F)(F)C(F)(F)CC1CO1                                 | -6.43 | 36.84 | 1.84 | P | IN  |
| QL03151 | 2-(2,2,3,3,4,4,4-Heptafluorobutyl)-1,3-dioxolane                          | 175607-87-1  | FC(F)(F)C(F)(F)C(F)(F)CC1OCCO1                               | -6.21 | 30.43 | 1.92 | P | IN  |
| QL03152 | 5-Bromo-1,1,1,2,2,3,3-heptafluoropentane                                  | 355-94-2     | FC(F)(F)C(F)(F)C(F)(F)CCBr                                   | -7.16 | 47.06 | 1.85 | P | IN  |
| QL03153 | 1,1,1,2,2,3,3,4,4,5,5,6,6,9,9,10,10,11,11-icosafuoroundecane              | 777931-73-4  | FC(F)(F)C(F)(F)C(F)(F)CCC(F)(F)C(F)(F)C(F)(F)C(F)(F)C(F)(F)F | -9.85 | 57.14 | 2.68 | P | IN  |
| QL03154 | 1,1,1,2,2,3,3,6,6,7,7,8,8,8-Tetradecafluorooctane                         | 1835251-92-7 | FC(F)(F)C(F)(F)C(F)(F)CCC(F)(F)C(F)(F)C(F)(F)F               | -8.37 | 53.85 | 2.16 | P | IN  |
| QL03155 | 7-Bromo-1,1,1,2,2,3,3-heptafluoroheptane                                  | 1391033-22-9 | FC(F)(F)C(F)(F)C(F)(F)CCCCBr                                 | -7.11 | 34.78 | 2.17 | P | IN  |
| QL03156 | 1,1,1,2,2,3,3,10,10,11,11,12,12,12-Tetradecafluorododecane                | 69125-82-2   | FC(F)(F)C(F)(F)C(F)(F)CCCCCCC(F)(F)C(F)(F)C(F)(F)F           | -8.29 | 36.84 | 2.60 | P | IN  |
| QL03157 | 1,1,1,2,2,3,3,12,12,13,13,14,14,14-Tetradecafluorotetradecane             | 1835251-91-6 | FC(F)(F)C(F)(F)C(F)(F)CCCCCCCC(F)(F)C(F)(F)C(F)(F)F          | -8.41 | 31.82 | 2.79 | P | IN  |
| QL03158 | 1,1,1,2,2,3,3,14,14,15,15,16,16,16-Tetradecafluorohexadecane              | 168169-26-4  | FC(F)(F)C(F)(F)C(F)(F)CCCCCCCCCCC(F)(F)C(F)(F)C(F)(F)F       | -8.56 | 28.00 | 2.96 | P | OUT |
| QL03159 | 1,1,1,2,2,3,3-Heptafluoro-7-iodoheptane                                   | 2967-60-4    | FC(F)(F)C(F)(F)C(F)(F)CCCCI                                  | -7.11 | 34.78 | 2.17 | P | IN  |
| QL03160 | 1,1,1,2,2,3,3-Heptafluoro-5-iodopentane                                   | 68188-12-5   | FC(F)(F)C(F)(F)C(F)(F)CCI                                    | -7.16 | 47.06 | 1.85 | P | IN  |
| QL03161 | 1,1,1,2,2,3,3-Heptafluoro-4-chlorobutane                                  | 374-97-0     | FC(F)(F)C(F)(F)C(F)(F)CCI                                    | -6.88 | 57.14 | 1.46 | P | IN  |
| QL03162 | Heptafluorobutyl iodide                                                   | 374-98-1     | FC(F)(F)C(F)(F)C(F)(F)CI                                     | -6.88 | 57.14 | 1.46 | P | IN  |
| QL03163 | 1-chloro-1,1,2,2,3,3,3-heptafluoropropane                                 | 422-86-6     | FC(F)(F)C(F)(F)C(F)(F)Cl                                     | -7.60 | 72.73 | 1.32 | P | OUT |
| QL03164 | N-Nitrosobis(2,2,3,3,4,4,4-heptafluorobutyl)amine                         | 83329-16-2   | FC(F)(F)C(F)(F)C(F)(F)CN(Cc(F)(F)C(F)(F)C(F)(F)N=O           | -8.58 | 48.28 | 2.40 | P | IN  |
| QL03165 | Isocyanic acid, 2,2,3,3,4,4,4-heptafluorobutyl ester                      | 377-00-4     | FC(F)(F)C(F)(F)C(F)(F)CN=C=O                                 | -7.17 | 43.75 | 1.95 | P | IN  |
| QL03166 | N-(2,2,3,3,4,4,4-Heptafluorobutyl)prop-2-enamide                          | 1422-65-7    | FC(F)(F)C(F)(F)C(F)(F)CNC(=O)C=C                             | -6.85 | 31.82 | 2.15 | P | IN  |
| QL03167 | 3-Benzamido-N-(2,2,3,3,4,4,4-heptafluorobutyl)benzamide                   | 917920-92-4  | FC(F)(F)C(F)(F)C(F)(F)CNC(=O)C1=CC(NC(=O)C2=CC=CC=C2)=CC=C1  | -7.72 | 16.67 | 2.93 | P | OUT |
| QL03168 | N-(2,2,3,3,4,4,4-Heptafluorobutyl)benzamide                               | 304458-19-3  | FC(F)(F)C(F)(F)C(F)(F)CNC(=O)c1ccccc1                        | -7.06 | 25.00 | 2.42 | P | OUT |
| QL03169 | 2,2,3,3,4,4,4-Heptafluoro-N-(2,2,3,3,4,4,4-heptafluorobutyl)butan-1-amine | 356-08-1     | FC(F)(F)C(F)(F)C(F)(F)CNCC(F)(F)C(F)(F)C(F)(F)F              | -8.51 | 50.00 | 2.33 | P | IN  |



|         |                                                                                                                |              |                                                                                                                                                                       |        |       |      |   |     |
|---------|----------------------------------------------------------------------------------------------------------------|--------------|-----------------------------------------------------------------------------------------------------------------------------------------------------------------------|--------|-------|------|---|-----|
| QL03170 | Tris(1H,1H-heptafluorobutyl)phosphate                                                                          | 563-09-7     | FC(F)(F)C(F)(F)C(F)(F)CO[P](=O)(OCC(F)(F)C(F)(F)C(F)(F)C(F)(F)C(F)(F)F                                                                                                | -8.86  | 47.73 | 2.53 | P | IN  |
| QL03171 | Chlorotris(2,2,3,3,4,4,4-heptafluorobutoxy)silane                                                              | 757-72-2     | FC(F)(F)C(F)(F)C(F)(F)CO[Si](Cl)(OCC(F)(F)C(F)(F)C(F)(F)C(F)(F)C(F)(F)F                                                                                               | -9.01  | 50.00 | 2.53 | P | IN  |
| QL03172 | tris(Perfluoropropyl)methyl borate                                                                             | 755-53-3     | FC(F)(F)C(F)(F)C(F)(F)COB(OCC(F)(F)C(F)(F)C(F)(F)C(F)(F)C(F)(F)F                                                                                                      | -8.88  | 48.84 | 2.51 | P | IN  |
| QL03173 | 2,2,3,3,4,4,4-Heptafluorobutyl 2-cyanoprop-2-enoate                                                            | 130192-28-8  | FC(F)(F)C(F)(F)C(F)(F)COC(=O)C(=C)C#N                                                                                                                                 | -7.01  | 31.82 | 2.21 | P | IN  |
| QL03174 | 2,2,3,3,4,4,4-Heptafluorobutyl 2-chloroprop-2-enoate                                                           | 74359-14-1   | FC(F)(F)C(F)(F)C(F)(F)COC(=O)C(Cl)=C                                                                                                                                  | -7.24  | 38.10 | 2.13 | P | IN  |
| QL03175 | 2,2,3,3,4,4,4-Heptafluorobutyl heptafluorobutanoate                                                            | 308-45-2     | FC(F)(F)C(F)(F)C(F)(F)COC(=O)C(F)(F)C(F)(F)C(F)(F)F                                                                                                                   | -8.86  | 53.85 | 2.36 | P | IN  |
| QL03176 | 1H,1H-Perfluorobutyl acrylate                                                                                  | 424-64-6     | FC(F)(F)C(F)(F)C(F)(F)COC(=O)C=C                                                                                                                                      | -6.96  | 33.33 | 2.15 | P | IN  |
| QL03177 | Bis(1H,1H-perfluorobutyl)fumarate                                                                              | 24120-17-0   | FC(F)(F)C(F)(F)C(F)(F)COC(=O)C=C(=O)OCC(F)(F)C(F)(F)C(F)(F)F                                                                                                          | -8.96  | 38.89 | 2.82 | P | IN  |
| QL03178 | 2,2,3,3,4,4,4-Heptafluorobutyl 1,2,3-benzothiadiazole-7-carboxylate                                            | 1384278-50-5 | FC(F)(F)C(F)(F)C(F)(F)COC(=O)c1cccc2nmsc12                                                                                                                            | -6.95  | 25.00 | 2.38 | P | OUT |
| QL03179 | 2,2,3,3,4,4,4-Heptafluorobutyl but-3-enoate                                                                    | 17165-56-9   | FC(F)(F)C(F)(F)C(F)(F)COC(=O)CC=C                                                                                                                                     | -6.87  | 29.17 | 2.23 | P | IN  |
| QL03180 | 1-Aziridinepropionic acid, 2,2,3,3,4,4,4-heptafluorobutyl ester                                                | 24160-20-1   | FC(F)(F)C(F)(F)C(F)(F)COC(=O)CCN1CC1                                                                                                                                  | -7.04  | 24.14 | 2.44 | P | OUT |
| QL03181 | Bis(2,2,3,3,4,4,4-heptafluorobutyl) carbonate                                                                  | 1026739-75-2 | FC(F)(F)C(F)(F)C(F)(F)COC(=O)OCC(F)(F)C(F)(F)C(F)(F)F                                                                                                                 | -8.89  | 46.67 | 2.57 | P | IN  |
| QL03182 | 2,2,3,3,4,4,4-Heptafluorobutyl carbonochloridate                                                               | 108156-21-4  | FC(F)(F)C(F)(F)C(F)(F)COC(Cl)=O                                                                                                                                       | -7.36  | 47.06 | 1.93 | P | IN  |
| QL03183 | 4-(Ethenyloxy)-1,1,1,2,2,3,3-heptafluorobutane                                                                 | 356-00-3     | FC(F)(F)C(F)(F)C(F)(F)COC=C                                                                                                                                           | -6.71  | 36.84 | 1.95 | P | IN  |
| QL03184 | 1-Ethenyl-4-(2,2,3,3,4,4,4-heptafluorobutoxy)benzene                                                           | 111144-99-1  | FC(F)(F)C(F)(F)C(F)(F)COC1=CC=C(C=C)C=C1                                                                                                                              | -7.30  | 24.14 | 2.55 | P | OUT |
| QL03185 | 2-[(4-(Perfluorobutoxy)pyridin-2-yl)methanesulfinyl]-1H-thieno[3,4-d]imidazole                                 | NOCAS_869668 | FC(F)(F)C(F)(F)C(F)(F)COC1=CC=NC(CS(=O)C2=NC3=CSC=C3N2)=C1                                                                                                            | -7.85  | 17.95 | 2.94 | P | OUT |
| QL03186 | 4-(2,2,3,3,4,4,4-Heptafluorobutoxy)benzaldehyde                                                                | 943767-44-0  | FC(F)(F)C(F)(F)C(F)(F)COC1ccc(C=O)cc1                                                                                                                                 | -7.42  | 25.93 | 2.55 | P | OUT |
| QL03187 | 4-(2,2,3,3,4,4,4-Heptafluorobutoxy)benzonitrile                                                                | 96308-32-6   | FC(F)(F)C(F)(F)C(F)(F)COC1ccc(c#N)cc1                                                                                                                                 | -7.49  | 26.92 | 2.55 | P | OUT |
| QL03188 | 1,1,1,2,2,3,3-Heptafluoro-4-(2,2,3,3,4,4,4-heptafluorobutoxy)butane                                            | 647-91-6     | FC(F)(F)C(F)(F)C(F)(F)COC(F)(F)C(F)(F)C(F)(F)F                                                                                                                        | -8.63  | 51.85 | 2.33 | P | IN  |
| QL03189 | Allyl 1H,1H-heptafluorobutyl ether                                                                             | 648-42-0     | FC(F)(F)C(F)(F)C(F)(F)COC=C                                                                                                                                           | -6.91  | 31.82 | 2.17 | P | IN  |
| QL03190 | NSC221106                                                                                                      | 59727-25-2   | FC(F)(F)C(F)(F)C(F)(F)COC(C)=CNC(=O)NC1=O                                                                                                                             | -7.19  | 25.00 | 2.47 | P | OUT |
| QL03191 | 2-[(2,2,3,3,4,4,4-Heptafluorobutoxy)methyl]oxirane                                                             | 648-43-1     | FC(F)(F)C(F)(F)C(F)(F)COC1CO1                                                                                                                                         | -6.76  | 30.43 | 2.15 | P | IN  |
| QL03192 | 4-[(2,2,3,3,4,4,4-Heptafluorobutoxy)methyl]-1,3-dioxolan-2-one                                                 | 181044-06-4  | FC(F)(F)C(F)(F)C(F)(F)COC1COC(=O)O1                                                                                                                                   | -7.12  | 26.92 | 2.39 | P | OUT |
| QL03193 | 4-(2-Chloroethoxy)-1,1,1,2,2,3,3-heptafluorobutane                                                             | 679-53-8     | FC(F)(F)C(F)(F)C(F)(F)COC(Cl)C                                                                                                                                        | -7.34  | 38.10 | 2.17 | P | IN  |
| QL03194 | 2,2,3,3,4,4,4-Heptafluorobutyl diphenylphosphinate                                                             | 55776-72-2   | FC(F)(F)C(F)(F)C(F)(F)COP(=O)(c1ccccc1)c1ccccc1                                                                                                                       | -6.46  | 18.42 | 2.36 | P | OUT |
| QL03195 | Bis(2,2,3,3,4,4,4-heptafluorobutyl) phenylphosphonate                                                          | 31430-72-5   | FC(F)(F)C(F)(F)C(F)(F)COP(=O)(OCC(F)(F)C(F)(F)C(F)(F)F)c1ccccc1                                                                                                       | -8.27  | 34.15 | 2.67 | P | IN  |
| QL03196 | bis(Perfluoropropyl)methyl phosphorochloridoate                                                                | 6780-81-0    | FC(F)(F)C(F)(F)C(F)(F)COP(Cl)(=O)OCC(F)(F)C(F)(F)C(F)(F)F                                                                                                             | -9.03  | 48.39 | 2.59 | P | IN  |
| QL03197 | 1,3,5,2,4,6-Triazaatriphosphorine, 2,2,4,4,6,6-hexakis(2,2,3,3,4,4,4-heptafluorobutoxy)-2,2,4,4,6,6-hexahydro- | 470-73-5     | FC(F)(F)C(F)(F)C(F)(F)COP1(OCC(F)(F)C(F)(F)C(F)(F)F)=NP(OCC(F)(F)C(F)(F)C(F)(F)F)(OCC(F)(F)C(F)(F)C(F)(F)F)=NP(OCC(F)(F)C(F)(F)C(F)(F)F)(OCC(F)(F)C(F)(F)C(F)(F)F)=N1 | -8.89  | 46.67 | 2.57 | P | IN  |
| QL03198 | 1H,1H-Perfluorobutyl perfluorobutanesulfonate                                                                  | 883499-32-9  | FC(F)(F)C(F)(F)C(F)(F)COS(=O)(=O)C(F)(F)C(F)(F)C(F)(F)F                                                                                                               | -9.16  | 53.33 | 2.50 | P | IN  |
| QL03199 | 1H,1H-Heptafluorobutyl triflate                                                                                | 6401-01-0    | FC(F)(F)C(F)(F)C(F)(F)COS(=O)(=O)C(F)(F)F                                                                                                                             | -7.77  | 47.62 | 2.09 | P | IN  |
| QL03200 | [[[2,2,3,3,4,4,4-Heptafluorobutyl)sulfonyl)methyl]benzene                                                      | 200337-06-0  | FC(F)(F)C(F)(F)C(F)(F)CSCc1ccccc1                                                                                                                                     | -6.99  | 25.00 | 2.39 | P | OUT |
| QL03201 | Perflutren                                                                                                     | 76-19-7      | FC(F)(F)C(F)(F)C(F)(F)F                                                                                                                                               | -7.60  | 72.73 | 1.32 | P | OUT |
| QL03202 | Heptafluoropropyl iodide                                                                                       | 754-34-7     | FC(F)(F)C(F)(F)C(F)(F)I                                                                                                                                               | -7.60  | 72.73 | 1.32 | P | OUT |
| QL03203 | Perfluoro-N,N,N',N'-tetraakis(heptafluoropropyl)-1,6-hexanediamine                                             | 143356-32-5  | FC(F)(F)C(F)(F)C(F)(F)N(C(F)(F)C(F)(F)C(F)(F)C(F)(F)C(F)(F)C(F)(F)C(F)(F)C(F)(F)N(C(F)(F)C(F)(F)C(F)(F)C(F)(F)C(F)(F)F                                                | -10.81 | 66.67 | 2.81 | P | OUT |
| QL03204 | Perfluamine                                                                                                    | 338-83-0     | FC(F)(F)C(F)(F)C(F)(F)N(C(F)(F)C(F)(F)C(F)(F)C(F)(F)C(F)(F)C(F)(F)F                                                                                                   | -9.01  | 67.74 | 2.04 | P | IN  |
| QL03205 | 1,1,1,2,4,5,5-Octafluoro-2-(heptafluoropropoxy)-4-(trifluoromethyl)pentan-3-one                                | 851535-00-7  | FC(F)(F)C(F)(F)C(F)(F)OC(F)(Cl)=O(C(F)(Cl)(F)F)C(F)(F)C(F)(F)F                                                                                                        | -8.93  | 62.07 | 2.17 | P | IN  |
| QL03206 | 1,5-Dideoxy-1,1,1,5,5,5-hexafluoro-2,4-di-C-fluoro-2,4-bis-O-(heptafluoropropyl)pent-3-ulose                   | 67118-49-4   | FC(F)(F)C(F)(F)C(F)(F)OC(F)(Cl)=O(C(F)(OC(F)(F)C(F)(F)C(F)(F)C(F)(F)C(F)(F)F                                                                                          | -10.04 | 61.11 | 2.65 | P | IN  |
| QL03207 | 1,1,1,2,6,7,7-Octafluoro-2,6-bis(heptafluoropropoxy)heptane-3,5-dione                                          | 87405-74-1   | FC(F)(F)C(F)(F)C(F)(F)OC(F)(Cl)=O(CCl(=O)C(F)(OC(F)(F)C(F)(F)C(F)(F)C(F)(F)C(F)(F)F                                                                                   | -9.96  | 53.66 | 2.82 | P | IN  |
| QL03208 | 2,3,3,3-Tetrafluoro-2-(heptafluoropropoxy)-1-(piperidin-1-yl)propan-1-one                                      | 176702-72-0  | FC(F)(F)C(F)(F)C(F)(F)OC(F)(Cl)=O)N1CCCCC1)C(F)(F)F                                                                                                                   | -7.57  | 31.43 | 2.45 | P | IN  |
| QL03209 | 2,3,3,3-Tetrafluoro-2-(heptafluoropropoxy)-1-(morpholin-4-yl)propan-1-one                                      | 176702-73-1  | FC(F)(F)C(F)(F)C(F)(F)OC(F)(Cl)=O)N1CCOCC1)C(F)(F)F                                                                                                                   | -7.70  | 33.33 | 2.45 | P | IN  |
| QL03210 | N-Benzyl-2,3,3,3-tetrafluoro-2-(heptafluoropropoxy)propanamide                                                 | 82970-41-0   | FC(F)(F)C(F)(F)C(F)(F)OC(F)(Cl)=O)NCc1ccccc1)C(F)(F)F                                                                                                                 | -8.16  | 31.43 | 2.70 | P | IN  |
| QL03211 | Cyclohexyl 2,3,3,3-tetrafluoro-2-(heptafluoropropoxy)propanoate                                                | 78755-41-6   | FC(F)(F)C(F)(F)C(F)(F)OC(F)(Cl)=O)OC1CCCCC1)C(F)(F)F                                                                                                                  | -7.64  | 29.73 | 2.53 | P | OUT |
| QL03212 | Phenyl 2,3,3,3-tetrafluoro-2-(heptafluoropropoxy)propanoate                                                    | 78755-31-4   | FC(F)(F)C(F)(F)C(F)(F)OC(F)(Cl)=O)Oc1ccccc1)C(F)(F)F                                                                                                                  | -8.02  | 35.48 | 2.53 | P | IN  |
| QL03213 | Prop-2-en-1-yl 2,3,3,3-tetrafluoro-2-(heptafluoropropoxy)propanoate                                            | 84123-65-9   | FC(F)(F)C(F)(F)C(F)(F)OC(F)(Cl)=O)OCC=C)C(F)(F)F                                                                                                                      | -8.11  | 39.29 | 2.46 | P | IN  |
| QL03214 | Benzyl 2,3,3,3-tetrafluoro-2-(heptafluoropropoxy)propanoate                                                    | 147224-19-9  | FC(F)(F)C(F)(F)C(F)(F)OC(F)(Cl)=O)OCC1CCCCC1)C(F)(F)F                                                                                                                 | -8.22  | 32.35 | 2.70 | P | IN  |
| QL03215 | bis(2,3,3,3-tetrafluoro-2-(heptafluoropropoxy)-1-oxopropyl)peroxide                                            | 56347-79-6   | FC(F)(F)C(F)(F)C(F)(F)OC(F)(Cl)=O)OOC(=O)C(F)(OC(F)(F)C(F)(F)C(F)(F)C(F)(F)F                                                                                          | -10.17 | 55.00 | 2.87 | P | OUT |
| QL03216 | 2,3,3,3-Tetrafluoro-2-(heptafluoropropoxy)propanoyl chloride                                                   | 72848-57-8   | FC(F)(F)C(F)(F)C(F)(F)OC(F)(Cl)Cl(=O)C(F)(F)F                                                                                                                         | -8.02  | 60.00 | 1.85 | P | IN  |







|         |                                                                                                                                               |              |                                                                                                                                                                                                                                                                                                       |        |       |      |   |     |
|---------|-----------------------------------------------------------------------------------------------------------------------------------------------|--------------|-------------------------------------------------------------------------------------------------------------------------------------------------------------------------------------------------------------------------------------------------------------------------------------------------------|--------|-------|------|---|-----|
| QL03251 | 1,1,1,2,2,5,5,6,6,7,7,8,8,9,9-Hexadecafluoronon-3-ene                                                                                         | 935477-04-6  | FC(F)(F)C(F)(F)C=CC(F)(F)C(F)(F)C(F)(F)C(F)(F)F                                                                                                                                                                                                                                                       | -9.41  | 59.26 | 2.44 | P | IN  |
| QL03252 | 1,1,1,2,2,5,5,6,6,7,7,8,8,8-Tetradecafluorooct-3-ene                                                                                          | 84808-65-1   | FC(F)(F)C(F)(F)C=CC(F)(F)C(F)(F)C(F)(F)C(F)(F)F                                                                                                                                                                                                                                                       | -8.84  | 58.33 | 2.23 | P | IN  |
| QL03253 | 1,1,1,2,2,5,5,6,6,7,7,7-Dodecafluorohept-3-ene                                                                                                | 887111-61-7  | FC(F)(F)C(F)(F)C=CC(F)(F)C(F)(F)C(F)(F)F                                                                                                                                                                                                                                                              | -8.41  | 57.14 | 2.09 | P | IN  |
| QL03254 | Perfluoro-5-(pentafluoroethyl)oxolane                                                                                                         | NOCAS_870516 | FC(F)(F)C(F)(F)C1(F)OC(F)(F)C(F)(F)C1(F)F                                                                                                                                                                                                                                                             | -8.01  | 63.16 | 1.76 | P | IN  |
| QL03255 | 2-(1,1,1,2,3,3,3-Heptafluoropropan-2-yl)-2-(pentafluoroethyl)-3,3-bis(trifluoromethyl)oxirane                                                 | 103697-21-8  | FC(F)(F)C(F)(F)C1(OC1(C(F)(F)C(F)(F)C(F)(F)C(F)(F)F                                                                                                                                                                                                                                                   | -7.64  | 64.29 | 1.57 | P | IN  |
| QL03256 | 2,4,6-Tris(pentafluoroethyl)-1,3,5-triazine                                                                                                   | 858-46-8     | FC(F)(F)C(F)(F)C1=NC(=NC(=N1)C(F)(F)C(F)(F)C(F)(F)F                                                                                                                                                                                                                                                   | -7.83  | 55.56 | 1.89 | P | IN  |
| QL03257 | 1,1,1,2,2,3,3,4,4,5,5,6,6,7,7,8,8,11,11,12,12,12-Docosafluoro-9-iodododecane                                                                  | 641617-25-6  | FC(F)(F)C(F)(F)CC(I)C(F)(F)C(F)(F)C(F)(F)C(F)(F)C(F)(F)F                                                                                                                                                                                                                                              | -10.22 | 60.53 | 2.74 | P | OUT |
| QL03258 | 1,1,1,2,2,3,3,4,4,7,7,8,8,8-Tetradecafluoro-5-iodooctane                                                                                      | 935553-89-2  | FC(F)(F)C(F)(F)CC(I)C(F)(F)C(F)(F)C(F)(F)C(F)(F)F                                                                                                                                                                                                                                                     | -8.80  | 57.69 | 2.24 | P | IN  |
| QL03259 | Bis(3-(perfluoroethyl)-1-(9-bromononyl)propyl)thioether                                                                                       | 148757-89-5  | FC(F)(F)C(F)(F)CCC(CCCCCCCCCBr)SC(CCCCCCCCCBr)CCC(F)(F)C(F)(F)F                                                                                                                                                                                                                                       | -8.46  | 13.79 | 3.31 | P | OUT |
| QL03260 | 1,1,1,2,2,3,3,4,4,7,7,8,8,8-Tetradecafluorooctane                                                                                             | 343627-66-7  | FC(F)(F)C(F)(F)CCC(F)(F)C(F)(F)C(F)(F)C(F)(F)F                                                                                                                                                                                                                                                        | -8.54  | 53.85 | 2.23 | P | IN  |
| QL03261 | 22 Fluorotelomer iodide                                                                                                                       | 40723-80-6   | FC(F)(F)C(F)(F)CCI                                                                                                                                                                                                                                                                                    | -6.07  | 42.86 | 1.52 | P | IN  |
| QL03262 | Thiols, C4-10, .gamma.-.omega.-perfluoro-(Perfluoroalkyl (C2-C8)ethyl mercaptan)                                                              | 68140-18-1   | FC(F)(F)C(F)(F)CCS                                                                                                                                                                                                                                                                                    | -5.43  | 33.33 | 1.52 | P | IN  |
| QL03263 | (Perfluoroethyl)methyl iodide                                                                                                                 | 354-69-8     | FC(F)(F)C(F)(F)CI                                                                                                                                                                                                                                                                                     | -6.55  | 54.55 | 1.39 | P | IN  |
| QL03264 | 1H,1H-Perfluoropropyl acrylate                                                                                                                | 356-86-5     | FC(F)(F)C(F)(F)COC(=O)C=C                                                                                                                                                                                                                                                                             | -5.94  | 27.78 | 1.88 | P | OUT |
| QL03265 | 2,2,3,3,3-Pentafluoropropyl nonafluorobutane-1-sulfonate                                                                                      | 893556-35-9  | FC(F)(F)C(F)(F)COS(=O)(=O)C(F)(F)C(F)(F)C(F)(F)F                                                                                                                                                                                                                                                      | -8.92  | 51.85 | 2.44 | P | IN  |
| QL03266 | Perfluoroethane                                                                                                                               | 76-16-4      | FC(F)(F)C(F)(F)F                                                                                                                                                                                                                                                                                      | -6.51  | 75.00 | 0.81 | P | OUT |
| QL03267 | Pentafluoriodoethane                                                                                                                          | 354-64-3     | FC(F)(F)C(F)(F)I                                                                                                                                                                                                                                                                                      | -6.51  | 75.00 | 0.81 | P | OUT |
| QL03268 | Perfluorotriethylamine                                                                                                                        | 359-70-6     | FC(F)(F)C(F)(F)N(C(F)(F)C(F)(F)C(F)(F)C(F)(F)F                                                                                                                                                                                                                                                        | -8.09  | 68.18 | 1.65 | P | OUT |
| QL03269 | Morpholine, 2,2,3,3,5,5,6,6-octafluoro-4-(pentafluoroethyl)-                                                                                  | 55716-11-5   | FC(F)(F)C(F)(F)N1C(F)(F)C(F)(F)OC(F)(F)C1(F)F                                                                                                                                                                                                                                                         | -7.70  | 61.90 | 1.66 | P | IN  |
| QL03270 | 1,1,1,2,2,3,3,4,4,5,5,5-Decafluoro-4-(pentafluoroethoxy)pentane                                                                               | 92978-07-9   | FC(F)(F)C(F)(F)OC(F)(C(F)(F)C(F)(F)C(F)(F)C(F)(F)F                                                                                                                                                                                                                                                    | -9.18  | 66.67 | 2.14 | P | IN  |
| QL03271 | Hexane, 1,1,2,2,3,3,4,4,5,5,6,6,6-tridecafluoro-1-(pentafluoroethoxy)-                                                                        | 133080-89-4  | FC(F)(F)C(F)(F)OC(F)(F)C(F)(F)C(F)(F)C(F)(F)C(F)(F)F                                                                                                                                                                                                                                                  | -9.90  | 66.67 | 2.44 | P | IN  |
| QL03272 | POLYFLGSID_880513                                                                                                                             | 60164-51-4   | FC(F)(F)C(F)(F)OC(F)(F)C(F)(F)C(F)(F)C(F)(F)F<br>FC(F)(F)C(F)(F)OC(F)(F)C(F)(F)C(F)(F)C(F)(F)F<br>FC(F)(F)C(F)(F)OC(F)(F)C(F)(F)OC(F)(F)C(F)(F)C(F)(F)F<br>[!p:0:3,2:3,3:3,5:3,6:3,7:2,9:3,10:3,12:3,13:3,15:3,16:3,17:2,19:3,20:3,22:3,23:3,25:3,26:3,27:3<br>,Sg:n:10,9,13,12,16,15,8,11,14,17::ht] | -8.57  | 66.67 | 1.89 | P | IN  |
| QL03273 | alpha-Perfluoropropyl omega-perfluoroethyl poly(perfluoropropylene oxide)                                                                     | 52700-35-3   | FC(F)(F)C(F)(F)OC(F)(F)C(F)(F)C(F)(F)C(F)(F)C(F)(F)F                                                                                                                                                                                                                                                  | -9.90  | 64.29 | 2.50 | P | IN  |
| QL03274 | Perfluoroethyl ether                                                                                                                          | 358-21-4     | FC(F)(F)C(F)(F)OC(F)(F)C(F)(F)F                                                                                                                                                                                                                                                                       | -8.12  | 66.67 | 1.71 | P | OUT |
| QL03275 | multiple ether-substituted Perfluoroalkyl (linear) sulfonic acids, n=8                                                                        |              | FC(F)(F)C(F)(F)OC(F)(F)C(F)(F)OC(F)(F)C(F)(F)C(F)(F)C(F)(F)C(F)(F)C(F)(F)S(=O)(O)=O                                                                                                                                                                                                                   | -10.76 | 56.82 | 3.06 | P | OUT |
| QL03276 | multiple ether-substituted Perfluoroalkyl (linear) sulfonic acids, n=7                                                                        |              | FC(F)(F)C(F)(F)OC(F)(F)C(F)(F)OC(F)(F)C(F)(F)C(F)(F)C(F)(F)C(F)(F)C(F)(F)S(=O)(O)=O                                                                                                                                                                                                                   | -10.39 | 56.10 | 2.93 | P | OUT |
| QL03277 | multiple ether-substituted Perfluoroalkyl (linear) sulfonic acids, n=6                                                                        |              | FC(F)(F)C(F)(F)OC(F)(F)C(F)(F)OC(F)(F)C(F)(F)C(F)(F)C(F)(F)C(F)(F)S(=O)(O)=O                                                                                                                                                                                                                          | -10.22 | 55.26 | 2.88 | P | OUT |
| QL03278 | multiple ether-substituted Perfluoroalkyl (linear) sulfonic acids, n=5                                                                        |              | FC(F)(F)C(F)(F)OC(F)(F)C(F)(F)OC(F)(F)C(F)(F)C(F)(F)C(F)(F)C(F)(F)S(=O)(O)=O                                                                                                                                                                                                                          | -9.78  | 54.29 | 2.73 | P | IN  |
| QL03279 | multiple ether-substituted Perfluoroalkyl (linear) sulfonic acids, n=4                                                                        |              | FC(F)(F)C(F)(F)OC(F)(F)C(F)(F)OC(F)(F)C(F)(F)C(F)(F)C(F)(F)S(=O)(O)=O                                                                                                                                                                                                                                 | -9.46  | 53.13 | 2.63 | P | IN  |
| QL03280 | multiple ether-substituted Perfluoroalkyl (linear) sulfonic acids, n=3                                                                        |              | FC(F)(F)C(F)(F)OC(F)(F)C(F)(F)OC(F)(F)C(F)(F)C(F)(F)S(=O)(O)=O                                                                                                                                                                                                                                        | -9.05  | 51.72 | 2.50 | P | IN  |
| QL03281 | multiple ether-substituted Perfluoroalkyl (linear) sulfonic acids, n=2                                                                        |              | FC(F)(F)C(F)(F)OC(F)(F)C(F)(F)OC(F)(F)C(F)(F)S(=O)(O)=O                                                                                                                                                                                                                                               | -8.79  | 50.00 | 2.44 | P | IN  |
| QL03282 | 1,1,2,2-Tetrafluoro-2-(pentafluoroethoxy)ethane-1-sulfonyl fluoride                                                                           | 67990-78-7   | FC(F)(F)C(F)(F)OC(F)(F)C(F)(F)S(F)=O=O                                                                                                                                                                                                                                                                | -7.83  | 55.56 | 1.89 | P | IN  |
| QL03283 | 2-(2-Bromo-1,1,2,2-tetrafluoroethoxy)-1,1,1,2,3,3-hexafluoro-3-(pentafluoroethoxy)propane                                                     | 1482416-44-3 | FC(F)(F)C(F)(F)OC(F)(F)C(F)(F)OC(F)(F)C(F)(F)BrC(F)(F)F                                                                                                                                                                                                                                               | -9.24  | 64.00 | 2.24 | P | IN  |
| QL03284 | 1,1,1,2,3,3-Hexafluoro-2,3-bis(pentafluoroethoxy)propane                                                                                      | 95842-03-8   | FC(F)(F)C(F)(F)OC(F)(F)C(F)(F)OC(F)(F)C(F)(F)C(F)(F)F                                                                                                                                                                                                                                                 | -9.24  | 64.00 | 2.24 | P | IN  |
| QL03285 | 1,1,2,2-Tetrafluoro-2-([1,1,1,2,3,3,3-hexafluoro-3-(pentafluoroethoxy)propan-2-yl]oxy)ethane-1-sulfonyl fluoride                              | 27744-59-8   | FC(F)(F)C(F)(F)OC(F)(F)C(F)(F)OC(F)(F)C(F)(F)S(=O)=O)C(F)(F)F                                                                                                                                                                                                                                         | -9.23  | 57.14 | 2.43 | P | IN  |
| QL03286 | 1-Bromo-1,1,2,2,4,4,5,5,7,8,8,10,11,11,13,13,14,14,14-octadecafluoro-4,7,10-tris(trifluoromethyl)-3,6,9,12-tetraoxatetradecane                | 1482416-51-2 | FC(F)(F)C(F)(F)OC(F)(F)C(F)(F)OC(F)(F)C(F)(F)OC(F)(F)C(F)(F)BrC(F)(F)C(F)(F)C(F)(F)C(F)(F)F                                                                                                                                                                                                           | -10.77 | 62.22 | 2.92 | P | OUT |
| QL03287 | 1-Bromo-1,1,2,2,4,4,5,5,7,8,8,10,11,11,13,14,14,16,16,17,17-henicosafuoro-4,7,10,13-tetrakis(trifluoromethyl)-3,6,9,12,15-pentaaxaheptadecane | 1482416-52-3 | FC(F)(F)C(F)(F)OC(F)(F)C(F)(F)OC(F)(F)C(F)(F)OC(F)(F)C(F)(F)OC(F)(F)C(F)(F)BrC(F)(F)C(F)(F)C(F)(F)C(F)(F)F                                                                                                                                                                                            | -11.32 | 61.82 | 3.16 | P | OUT |
| QL03288 | 1,2-Dichloro(perfluoro-1-(ethoxymethoxy)ethane)                                                                                               | 369371-42-6  | FC(F)(F)C(F)(F)OC(F)(F)OC(F)(F)C(F)(F)C(F)(F)Cl                                                                                                                                                                                                                                                       | -8.82  | 63.16 | 2.09 | P | IN  |
| QL03289 | 2,2,3,5,6-Pentafluoro-5-(pentafluoroethoxy)-3,6-bis(trifluoromethyl)-1,4-dioxane                                                              | 84041-66-7   | FC(F)(F)C(F)(F)OC1(F)OC(F)(C(F)(F)C(F)(F)C(F)(F)OC1(F)C(F)(F)F                                                                                                                                                                                                                                        | -8.54  | 59.26 | 2.08 | P | IN  |
| QL03290 | Pentafluoroethane-1-sulfonyl chloride                                                                                                         | 64773-40-6   | FC(F)(F)C(F)(F)S(Cl)=O=O                                                                                                                                                                                                                                                                              | -6.38  | 54.55 | 1.32 | P | IN  |
| QL03291 | Heptafluoro-2-iodopropane                                                                                                                     | 677-69-0     | FC(F)(F)C(F)(F)C(F)(F)F                                                                                                                                                                                                                                                                               | -7.60  | 72.73 | 1.32 | P | OUT |
| QL03292 | 1,1,1,2,3,3,3-Heptafluoro-2-(1,1,2,3,3,3-hexafluoro-2-iodopropoxy)propane                                                                     | 16005-45-1   | FC(F)(F)C(F)(F)C(F)(F)OC(F)(F)C(F)(F)C(F)(F)F                                                                                                                                                                                                                                                         | -8.40  | 66.67 | 1.82 | P | IN  |



|         |                                                                                                           |             |                                                                                                              |        |       |      |   |     |
|---------|-----------------------------------------------------------------------------------------------------------|-------------|--------------------------------------------------------------------------------------------------------------|--------|-------|------|---|-----|
| QL03293 | Morpholine, 2,2,3,3,5,5,6,6-octafluoro-4-[1,1,2,2,2-tetrafluoro-1-(trifluoromethyl)ethyl]-                | 1600-71-1   | FC(F)(F)C(F)(N1C(F)(F)C(F)(F)OC(F)(F)C1(F)C(F)(F)F                                                           | -7.62  | 62.50 | 1.61 | P | IN  |
| QL03294 | Heptafluoroisopropyl acrylate                                                                             | 13057-08-4  | FC(F)(F)C(F)(OC(=O)C=C)C(F)(F)F                                                                              | -6.21  | 38.89 | 1.69 | P | IN  |
| QL03295 | 1,1,1,2,3,3,3-Heptafluoropropan-2-yl benzoate                                                             | 57024-21-2  | FC(F)(F)C(F)(OC(=O)c1ccccc1)C(F)(F)F                                                                         | -6.56  | 29.17 | 2.10 | P | IN  |
| QL03296 | 2-(1,2-Dichloro-1,2,2-trifluoroethoxy)-1,1,1,2,3,3,3-heptafluoropropane                                   | 85720-81-6  | FC(F)(F)C(F)(OC(F)(Cl)C(F)(F)Cl)C(F)(F)F                                                                     | -7.90  | 66.67 | 1.61 | P | OUT |
| QL03297 | 2-(2-Chloro-1,1,2-trifluoro-2-iodoethoxy)-1,1,1,2,3,3,3-heptafluoropropane                                | 16031-04-2  | FC(F)(F)C(F)(OC(F)(F)C(F)(Cl)C(F)(F)F                                                                        | -7.90  | 66.67 | 1.61 | P | OUT |
| QL03298 | 2-(2-Bromo-1,1,2,2-tetrafluoroethoxy)-1,1,1,2,3,3,3-heptafluoropropane                                    | 16005-49-5  | FC(F)(F)C(F)(OC(F)(F)C(F)(F)Br)C(F)(F)F                                                                      | -7.90  | 66.67 | 1.61 | P | OUT |
| QL03299 | 1,1,2,2,3,3,4,4,5,5,6,6,7,7,8,8-Hexadecafluoro-1-[(1,1,1,2,3,3,3-heptafluoropropan-2-yl)oxy]-8-iodooctane | 25080-19-7  | FC(F)(F)C(F)(OC(F)(F)C(F)(F)C(F)(F)C(F)(F)C(F)(F)C(F)(F)C(F)(F)C(F)(F)F                                      | -10.39 | 66.67 | 2.64 | P | OUT |
| QL03300 | 1,1,2,2,3,3,4,4,5,5,6,6-Dodecafluoro-1-[(1,1,1,2,3,3,3-heptafluoropropan-2-yl)oxy]-8-iodooctane           | 25080-25-5  | FC(F)(F)C(F)(OC(F)(F)C(F)(F)C(F)(F)C(F)(F)C(F)(F)C(C)C(F)(F)F                                                | -9.71  | 55.56 | 2.67 | P | IN  |
| QL03301 | 1-Iodo-6-(heptafluoroisopropoxy)perfluorohexane                                                           | 25080-18-6  | FC(F)(F)C(F)(OC(F)(F)C(F)(F)C(F)(F)C(F)(F)C(F)(F))C(F)(F)F                                                   | -9.78  | 66.67 | 2.39 | P | IN  |
| QL03302 | 1,1,2,2,3,3,4,4-Octafluoro-1-[(1,1,1,2,3,3,3-heptafluoropropan-2-yl)oxy]-6-iodohexane                     | 25080-24-4  | FC(F)(F)C(F)(OC(F)(F)C(F)(F)C(F)(F)C(C)C(F)(F)F                                                              | -8.97  | 53.33 | 2.43 | P | IN  |
| QL03303 | 1,1,2,2,3,3,4,4-Octafluoro-1-[(1,1,1,2,3,3,3-heptafluoropropan-2-yl)oxy]-4-iodobutane                     | 25080-17-5  | FC(F)(F)C(F)(OC(F)(F)C(F)(F)C(F)(F)C(F)(F))C(F)(F)F                                                          | -9.04  | 66.67 | 2.08 | P | IN  |
| QL03304 | 1,1,2,2,3,3,4,4-Octafluoro-1,4-bis[(1,1,1,2,3,3,3-heptafluoropropan-2-yl)oxy]butane                       | 23228-90-2  | FC(F)(F)C(F)(OC(F)(F)C(F)(F)C(F)(F)C(F)(F)OC(F)(F)C(F)(F)C(F)(F)C(F)(F)F                                     | -9.52  | 64.71 | 2.34 | P | IN  |
| QL03305 | 1-[2,3,3,3-Tetrafluoro-2-(heptafluoropropoxy)-1-(piperidin-1-yl)propyl]-1H-benzotriazole                  | 133384-08-4 | FC(F)(F)C(F)(OC(F)(F)C(F)(F)C(F)(F)C(F)(F)CN1CCCCC1n1nnC2cccc12                                              | -7.02  | 22.92 | 2.47 | P | OUT |
| QL03306 | 1,1,1,2,3,3,3-Heptafluoro-2-(1,1,2,2-tetrafluoro-2-iodoethoxy)propane                                     | 16005-38-2  | FC(F)(F)C(F)(OC(F)(F)C(F)(F))C(F)(F)F                                                                        | -7.90  | 66.67 | 1.61 | P | OUT |
| QL03307 | Bis(perfluoro(1-{[3,6-dimethyl-1,4-dioxan-2-yl]oxy}ethyl)) ketone                                         | 61097-96-9  | FC(F)(F)C(F)(OC1(F)OC(F)(C(F)(F)C(F)(F)C(=O)C(F)(OC1(F)OC(F)(C(F)(F)C(F)(F)C(F)F)OC1(F)OC1(F)C(F)(F)C(F)(F)F | -10.01 | 55.56 | 2.79 | P | IN  |
| QL03308 | Perfluoro-2,3-bis(2,5-dimethyl-1,4-dioxan-3-oxy)butane                                                    | 61097-98-1  | FC(F)(F)C(F)(OC(F)(F)C(F)(F)F                                                                                | -9.88  | 57.69 | 2.68 | P | IN  |
| QL03309 | 2-[(1,1,1,2,3,3,3-Heptafluoropropan-2-yl)oxy]-N-phenylacetamide                                           | 62656-67-1  | FC(F)(F)C(F)(OCC(=O)NC1=CC=CC=C1)C(F)(F)F                                                                    | -6.84  | 24.14 | 2.36 | P | OUT |
| QL03310 | Allyl perfluoroisopropyl ether                                                                            | 15242-17-8  | FC(F)(F)C(F)(OCC=C)C(F)(F)F                                                                                  | -6.08  | 36.84 | 1.69 | P | IN  |
| QL03311 | Trichloro[3-[1,2,2,2-tetrafluoro-1-(trifluoromethyl)ethoxy]propyl]silane                                  | 15538-93-9  | FC(F)(F)C(F)(OCCC[Si](Cl)(Cl)Cl)C(F)(F)F                                                                     | -6.96  | 41.67 | 1.92 | P | IN  |
| QL03312 | Dichloromethyl[3-[1,2,2,2-tetrafluoro-1-(trifluoromethyl)ethoxy]propyl]silane                             | 20006-68-2  | FC(F)(F)C(F)(OCCC[SiH2](Cl)Cl)C(F)(F)F                                                                       | -6.74  | 33.33 | 2.06 | P | IN  |
| QL03313 | 1-Bromo-4-[(1,1,1,2,3,3,3-heptafluoropropan-2-yl)oxy]butane                                               | 37027-49-9  | FC(F)(F)C(F)(OCCCCBr)C(F)(F)F                                                                                | -6.65  | 33.33 | 2.02 | P | IN  |
| QL03314 | 1,1,1,2,3,3,5,5,7,7,7-UnDecafluoro-6-iodo-2,4-bis(trifluoromethyl)heptane                                 | 922524-01-4 | FC(F)(F)C(Cl)C(F)(F)C(C(F)(F)C(F)(F)C(F)(F)C(F)(F)C(F)(F)F                                                   | -8.61  | 62.07 | 2.04 | P | IN  |
| QL03315 | 1,1,1,2,3,3,5,5,5-Nonafluoro-4-iodo-2-(trifluoromethyl)pentane                                            | 922524-00-3 | FC(F)(F)C(Cl)C(F)(F)C(F)(C(F)(F)F)C(F)(F)F                                                                   | -8.03  | 65.00 | 1.71 | P | IN  |
| QL03316 | 1,1,1,2,3,3,4,4,5,5,6,6,7,7,9,9,9-Octadecafluoro-8-iodononane                                             | 922524-04-7 | FC(F)(F)C(Cl)C(F)(F)C(F)(F)C(F)(F)C(F)(F)C(F)(F)C(F)(F)C(F)(F)F                                              | -9.84  | 65.52 | 2.45 | P | IN  |
| QL03317 | 1,1,1,2,7,7,7-Heptafluoro-6-iodo-2,4-bis(trifluoromethyl)heptane                                          | 922523-99-7 | FC(F)(F)C(Cl)CC(C(F)(C(F)(F)C(F)(F)C(F)(F)F                                                                  | -7.76  | 48.28 | 2.07 | P | IN  |
| QL03318 | 1,1,1,2,5,5,5-Heptafluoro-4-iodo-2-(trifluoromethyl)pentane                                               | 922523-98-6 | FC(F)(F)C(Cl)CC(F)(C(F)(F)C(F)(F)F                                                                           | -7.10  | 55.00 | 1.61 | P | IN  |
| QL03319 | 1,1,1,2,2,3,3,4,4,5,5,6,6,9,9,9-Hexadecafluoro-8-iodononane                                               | 922524-02-5 | FC(F)(F)C(Cl)CC(F)(F)C(F)(F)C(F)(F)C(F)(F)C(F)(F)F                                                           | -9.38  | 58.62 | 2.45 | P | IN  |
| QL03320 | 1,1,1,2,2,3,3,4,4,7,7,7-Dodecafluoro-6-iodoheptane                                                        | 935553-88-1 | FC(F)(F)C(Cl)CC(F)(F)C(F)(F)C(F)(F)C(F)(F)F                                                                  | -8.56  | 56.52 | 2.17 | P | IN  |
| QL03321 | 1,1,1,3,3,3-Hexafluoropropan-2-yl heptafluorobutanoate                                                    | 922168-41-0 | FC(F)(F)C(OC(=O)C(F)(F)C(F)(F)C(F)(F)C(F)(F)F                                                                | -8.29  | 56.52 | 2.06 | P | IN  |
| QL03322 | Hexafluoroisopropyl acrylate                                                                              | 2160-89-6   | FC(F)(F)C(OC(=O)C=C)C(F)(F)F                                                                                 | -5.84  | 33.33 | 1.69 | P | IN  |
| QL03323 | 1,1,1,3,3,3-Hexafluoropropan-2-yl nonafluorobutane-1-sulfonate                                            | 118334-96-6 | FC(F)(F)C(OS(=O)(=O)C(F)(F)C(F)(F)C(F)(F)C(F)(F)F                                                            | -8.52  | 55.56 | 2.18 | P | IN  |
| QL03324 | H-substituted perfluoroalkyl (linear) sulfonic acids_ii, n=0                                              |             | FC(F)(F)C(S(=O)(O)=O)(F)[H]                                                                                  | -4.88  | 33.33 | 1.30 | P | IN  |
| QL03325 | 1,1,1,4,4,5,5,6,6,7,7,8,8,9,9-Hexadecafluoronon-2-ene                                                     | 935477-01-3 | FC(F)(F)C=C(C(F)(F)C(F)(F)C(F)(F)C(F)(F)C(F)(F)F                                                             | -9.41  | 59.26 | 2.44 | P | IN  |
| QL03326 | 1,1,1,4,4,5,5,6,6,7,7,8,8,8-Tetradecafluorooct-2-ene                                                      | 935476-95-2 | FC(F)(F)C=C(C(F)(F)C(F)(F)C(F)(F)C(F)(F)F                                                                    | -8.84  | 58.33 | 2.23 | P | IN  |
| QL03327 | 1,1,1,4,4,5,5,6,6,7,7,7-Dodecafluorohept-2-ene                                                            | 887111-62-8 | FC(F)(F)C=C(C(F)(F)C(F)(F)C(F)(F)F                                                                           | -8.61  | 57.14 | 2.17 | P | IN  |
| QL03328 | (2E)-1,1,1,4,4,5,5,6,6-Decafluorohex-2-ene                                                                | 83227-62-7  | FC(F)(F)C=C(C(F)(F)C(F)(F)F                                                                                  | -7.86  | 55.56 | 1.91 | P | IN  |
| QL03329 | Cyclohexane, decafluorobis(trifluoromethyl)-(6C1,7C1,8C1,9C1)                                             | 26637-68-3  | FC(F)(F)C1C(F)(F)C(F)C(F)(F)C(F)(F)C1(F)F                                                                    | -7.66  | 66.67 | 1.52 | P | OUT |
| QL03330 | Perfluorodimethylcyclobutane                                                                              | 28677-00-1  | FC(F)(F)C1C(F)(F)C(F)C(F)(F)C1(F)F                                                                           | -7.58  | 66.67 | 1.48 | P | OUT |
| QL03331 | Perfluoro-1,3,5-trimethylcyclohexane                                                                      | 374-76-5    | FC(F)(F)C1C(F)C(F)(F)C(F)(F)C(F)(F)C1(F)F                                                                    | -7.26  | 66.67 | 1.35 | P | OUT |
| QL03332 | Cyclobutane, 1,1,2,3,4-hexafluoro-2,4-bis(trifluoromethyl)-                                               | 13221-71-1  | FC(F)(F)C1C(F)C(F)C(F)(F)C1(F)F                                                                              | -8.57  | 66.67 | 1.89 | P | IN  |
| QL03333 | 1,1,2,2,3,4,4,5,5,6-Decafluoro-3,6-bis(trifluoromethyl)cyclohexane                                        | 374-77-6    | FC(F)(F)C1C(F)C(F)(F)C(F)(F)C(F)(F)C1(F)F                                                                    | -8.57  | 66.67 | 1.89 | P | IN  |
| QL03334 | Perfluoro-1,3-dimethylcyclohexane                                                                         | 335-27-3    | FC(F)(F)C1C(F)C(F)C(F)(F)C(F)(F)C1(F)F                                                                       | -7.58  | 66.67 | 1.48 | P | OUT |
| QL03335 | Perfluoro-5,5'-bis(trifluoromethyl)-1,1'-bicyclohexyl                                                     | 105462-77-9 | FC(F)(F)C1C(F)(F)C(F)C(F)(F)C1(F)C(F)(F)C(F)(F)C(F)(F)C1(F)F                                                 | -9.08  | 65.00 | 2.15 | P | IN  |







[illegible]



|         |                                                                                                             |            |             |             |            |            |            |            |           |           |            |           |            |            |           |            |             |             |             |            |            |            |           |          |          |            |          |             |           |            |          |            |          |          |             |          |          |              |           |           |          |          |          |           |          |          |            |
|---------|-------------------------------------------------------------------------------------------------------------|------------|-------------|-------------|------------|------------|------------|------------|-----------|-----------|------------|-----------|------------|------------|-----------|------------|-------------|-------------|-------------|------------|------------|------------|-----------|----------|----------|------------|----------|-------------|-----------|------------|----------|------------|----------|----------|-------------|----------|----------|--------------|-----------|-----------|----------|----------|----------|-----------|----------|----------|------------|
| QL03425 | Perfluoro(2-bromoethoxy)ethene<br>2,2,3,3,4,4,5,5,6,6-Decafluoro-6-<br>[(trifluoroethenyl)oxy]hexanenitrile | 85733-06-0 | 120903-40-4 | 609818-38-4 | 80962-91-0 | 40573-09-9 | 13846-22-5 | 84145-18-6 | 6037-91-8 | 1998-53-4 | 29514-94-1 | 1644-11-7 | 69804-19-9 | 16090-14-5 | 2599-84-0 | 64080-43-9 | 346662-93-9 | 369371-47-1 | 700874-87-9 | 13845-92-6 | 61097-79-8 | 17256-52-9 | 1840-17-1 | 690-27-7 | 424-32-8 | 93894-55-4 | 375-63-3 | 691358-66-4 | 1427-89-0 | 66577-33-1 | 423-66-5 | 66563-68-6 | 375-97-3 | 375-94-0 | 125370-60-7 | 335-65-9 | 307-99-3 | NOCAS_871634 | 2993-85-3 | 1737-33-3 | 355-37-3 | 336-07-2 | 375-61-1 | 2648-47-7 | 423-31-4 | 376-84-1 | 16059-16-8 |
| QL03426 | Perfluoro(2-bromoethoxy)ethene<br>2,2,3,3,4,4,5,5,6,6-Decafluoro-6-<br>[(trifluoroethenyl)oxy]hexanenitrile | 85733-06-0 | 120903-40-4 | 609818-38-4 | 80962-91-0 | 40573-09-9 | 13846-22-5 | 84145-18-6 | 6037-91-8 | 1998-53-4 | 29514-94-1 | 1644-11-7 | 69804-19-9 | 16090-14-5 | 2599-84-0 | 64080-43-9 | 346662-93-9 | 369371-47-1 | 700874-87-9 | 13845-92-6 | 61097-79-8 | 17256-52-9 | 1840-17-1 | 690-27-7 | 424-32-8 | 93894-55-4 | 375-63-3 | 691358-66-4 | 1427-89-0 | 66577-33-1 | 423-66-5 | 66563-68-6 | 375-97-3 | 375-94-0 | 125370-60-7 | 335-65-9 | 307-99-3 | NOCAS_871634 | 2993-85-3 | 1737-33-3 | 355-37-3 | 336-07-2 | 375-61-1 | 2648-47-7 | 423-31-4 | 376-84-1 | 16059-16-8 |
| QL03427 | Perfluoro(2-bromoethoxy)ethene<br>2,2,3,3,4,4,5,5,6,6-Decafluoro-6-<br>[(trifluoroethenyl)oxy]hexanenitrile | 85733-06-0 | 120903-40-4 | 609818-38-4 | 80962-91-0 | 40573-09-9 | 13846-22-5 | 84145-18-6 | 6037-91-8 | 1998-53-4 | 29514-94-1 | 1644-11-7 | 69804-19-9 | 16090-14-5 | 2599-84-0 | 64080-43-9 | 346662-93-9 | 369371-47-1 | 700874-87-9 | 13845-92-6 | 61097-79-8 | 17256-52-9 | 1840-17-1 | 690-27-7 | 424-32-8 | 93894-55-4 | 375-63-3 | 691358-66-4 | 1427-89-0 | 66577-33-1 | 423-66-5 | 66563-68-6 | 375-97-3 | 375-94-0 | 125370-60-7 | 335-65-9 | 307-99-3 | NOCAS_871634 | 2993-85-3 | 1737-33-3 | 355-37-3 | 336-07-2 | 375-61-1 | 2648-47-7 | 423-31-4 | 376-84-1 | 16059-16-8 |
| QL03428 | Perfluoro(2-bromoethoxy)ethene<br>2,2,3,3,4,4,5,5,6,6-Decafluoro-6-<br>[(trifluoroethenyl)oxy]hexanenitrile | 85733-06-0 | 120903-40-4 | 609818-38-4 | 80962-91-0 | 40573-09-9 | 13846-22-5 | 84145-18-6 | 6037-91-8 | 1998-53-4 | 29514-94-1 | 1644-11-7 | 69804-19-9 | 16090-14-5 | 2599-84-0 | 64080-43-9 | 346662-93-9 | 369371-47-1 | 700874-87-9 | 13845-92-6 | 61097-79-8 | 17256-52-9 | 1840-17-1 | 690-27-7 | 424-32-8 | 93894-55-4 | 375-63-3 | 691358-66-4 | 1427-89-0 | 66577-33-1 | 423-66-5 | 66563-68-6 | 375-97-3 | 375-94-0 | 125370-60-7 | 335-65-9 | 307-99-3 | NOCAS_871634 | 2993-85-3 | 1737-33-3 | 355-37-3 | 336-07-2 | 375-61-1 | 2648-47-7 | 423-31-4 | 376-84-1 | 16059-16-8 |
| QL03429 | Perfluoro(2-bromoethoxy)ethene<br>2,2,3,3,4,4,5,5,6,6-Decafluoro-6-<br>[(trifluoroethenyl)oxy]hexanenitrile | 85733-06-0 | 120903-40-4 | 609818-38-4 | 80962-91-0 | 40573-09-9 | 13846-22-5 | 84145-18-6 | 6037-91-8 | 1998-53-4 | 29514-94-1 | 1644-11-7 | 69804-19-9 | 16090-14-5 | 2599-84-0 | 64080-43-9 | 346662-93-9 | 369371-47-1 | 700874-87-9 | 13845-92-6 | 61097-79-8 | 17256-52-9 | 1840-17-1 | 690-27-7 | 424-32-8 | 93894-55-4 | 375-63-3 | 691358-66-4 | 1427-89-0 | 66577-33-1 | 423-66-5 | 66563-68-6 | 375-97-3 | 375-94-0 | 125370-60-7 | 335-65-9 | 307-99-3 | NOCAS_871634 | 2993-85-3 | 1737-33-3 | 355-37-3 | 336-07-2 | 375-61-1 | 2648-47-7 | 423-31-4 | 376-84-1 | 16059-16-8 |
| QL03430 | Perfluoro(2-bromoethoxy)ethene<br>2,2,3,3,4,4,5,5,6,6-Decafluoro-6-<br>[(trifluoroethenyl)oxy]hexanenitrile | 85733-06-0 | 120903-40-4 | 609818-38-4 | 80962-91-0 | 40573-09-9 | 13846-22-5 | 84145-18-6 | 6037-91-8 | 1998-53-4 | 29514-94-1 | 1644-11-7 | 69804-19-9 | 16090-14-5 | 2599-84-0 | 64080-43-9 | 346662-93-9 | 369371-47-1 | 700874-87-9 | 13845-92-6 | 61097-79-8 | 17256-52-9 | 1840-17-1 | 690-27-7 | 424-32-8 | 93894-55-4 | 375-63-3 | 691358-66-4 | 1427-89-0 | 66577-33-1 | 423-66-5 | 66563-68-6 | 375-97-3 | 375-94-0 | 125370-60-7 | 335-65-9 | 307-99-3 | NOCAS_871634 | 2993-85-3 | 1737-33-3 | 355-37-3 | 336-07-2 | 375-61-1 | 2648-47-7 | 423-31-4 | 376-84-1 | 16059-16-8 |
| QL03431 | Perfluoro(2-bromoethoxy)ethene<br>2,2,3,3,4,4,5,5,6,6-Decafluoro-6-<br>[(trifluoroethenyl)oxy]hexanenitrile | 85733-06-0 | 120903-40-4 | 609818-38-4 | 80962-91-0 | 40573-09-9 | 13846-22-5 | 84145-18-6 | 6037-91-8 | 1998-53-4 | 29514-94-1 | 1644-11-7 | 69804-19-9 | 16090-14-5 | 2599-84-0 | 64080-43-9 | 346662-93-9 | 369371-47-1 | 700874-87-9 | 13845-92-6 | 61097-79-8 | 17256-52-9 | 1840-17-1 | 690-27-7 | 424-32-8 | 93894-55-4 | 375-63-3 | 691358-66-4 | 1427-89-0 | 66577-33-1 | 423-66-5 | 66563-68-6 | 375-97-3 | 375-94-0 | 125370-60-7 | 335-65-9 | 307-99-3 | NOCAS_871634 | 2993-85-3 | 1737-33-3 | 355-37-3 | 336-07-2 | 375-61-1 | 2648-47-7 | 423-31-4 | 376-84-1 | 16059-16-8 |
| QL03432 | Perfluoro(2-bromoethoxy)ethene<br>2,2,3,3,4,4,5,5,6,6-Decafluoro-6-<br>[(trifluoroethenyl)oxy]hexanenitrile | 85733-06-0 | 120903-40-4 | 609818-38-4 | 80962-91-0 | 40573-09-9 | 13846-22-5 | 84145-18-6 | 6037-91-8 | 1998-53-4 | 29514-94-1 | 1644-11-7 | 69804-19-9 | 16090-14-5 | 2599-84-0 | 64080-43-9 | 346662-93-9 | 369371-47-1 | 700874-87-9 | 13845-92-6 | 61097-79-8 | 17256-52-9 | 1840-17-1 | 690-27-7 | 424-32-8 | 93894-55-4 | 375-63-3 | 691358-66-4 | 1427-89-0 | 66577-33-1 | 423-66-5 | 66563-68-6 | 375-97-3 | 375-94-0 | 125370-60-7 | 335-65-9 | 307-99-3 | NOCAS_871634 | 2993-85-3 | 1737-33-3 | 355-37-3 | 336-07-2 | 375-61-1 | 2648-47-7 | 423-31-4 | 376-84-1 | 16059-16-8 |
| QL03433 | Perfluoro(2-bromoethoxy)ethene<br>2,2,3,3,4,4,5,5,6,6-Decafluoro-6-<br>[(trifluoroethenyl)oxy]hexanenitrile | 85733-06-0 | 120903-40-4 | 609818-38-4 | 80962-91-0 | 40573-09-9 | 13846-22-5 | 84145-18-6 | 6037-91-8 | 1998-53-4 | 29514-94-1 | 1644-11-7 | 69804-19-9 | 16090-14-5 | 2599-84-0 | 64080-43-9 | 346662-93-9 | 369371-47-1 | 700874-87-9 | 13845-92-6 | 61097-79-8 | 17256-52-9 | 1840-17-1 | 690-27-7 | 424-32-8 | 93894-55-4 | 375-63-3 | 691358-66-4 | 1427-89-0 | 66577-33-1 | 423-66-5 | 66563-68-6 | 375-97-3 | 375-94-0 | 125370-60-7 | 335-65-9 | 307-99-3 | NOCAS_871634 | 2993-85-3 | 1737-33-3 | 355-37-3 | 336-07-2 | 375-61-1 | 2648-47-7 | 423-31-4 | 376-84-1 | 16059-16-8 |
| QL03434 | Perfluoro(2-bromoethoxy)ethene<br>2,2,3,3,4,4,5,5,6,6-Decafluoro-6-<br>[(trifluoroethenyl)oxy]hexanenitrile | 85733-06-0 | 120903-40-4 | 609818-38-4 | 80962-91-0 | 40573-09-9 | 13846-22-5 | 84145-18-6 | 6037-91-8 | 1998-53-4 | 29514-94-1 | 1644-11-7 | 69804-19-9 | 16090-14-5 | 2599-84-0 | 64080-43-9 | 346662-93-9 | 369371-47-1 | 700874-87-9 | 13845-92-6 | 61097-79-8 | 17256-52-9 | 1840-17-1 | 690-27-7 | 424-32-8 | 93894-55-4 | 375-63-3 | 691358-66-4 | 1427-89-0 | 66577-33-1 | 423-66-5 | 66563-68-6 | 375-97-3 | 375-94-0 | 125370-60-7 | 335-65-9 | 307-99-3 | NOCAS_871634 | 2993-85-3 | 1737-33-3 | 355-37-3 | 336-07-2 | 375-61-1 | 2648-47-7 | 423-31-4 | 376-84-1 | 16059-16-8 |
| QL03435 | Perfluoro(2-bromoethoxy)ethene<br>2,2,3,3,4,4,5,5,6,6-Decafluoro-6-<br>[(trifluoroethenyl)oxy]hexanenitrile | 85733-06-0 | 120903-40-4 | 609818-38-4 | 80962-91-0 | 40573-09-9 | 13846-22-5 | 84145-18-6 | 6037-91-8 | 1998-53-4 | 29514-94-1 | 1644-11-7 | 69804-19-9 | 16090-14-5 | 2599-84-0 | 64080-43-9 | 346662-93-9 | 369371-47-1 | 700874-87-9 | 13845-92-6 | 61097-79-8 | 17256-52-9 | 1840-17-1 | 690-27-7 | 424-32-8 | 93894-55-4 | 375-63-3 | 691358-66-4 | 1427-89-0 | 66577-33-1 | 423-66-5 | 66563-68-6 | 375-97-3 | 375-94-0 | 125370-60-7 | 335-65-9 | 307-99-3 | NOCAS_871634 | 2993-85-3 | 1737-33-3 | 355-37-3 | 336-07-2 | 375-61-1 | 2648-47-7 | 423-31-4 | 376-84-1 | 16059-16-8 |
| QL03436 | Perfluoro(2-bromoethoxy)ethene<br>2,2,3,3,4,4,5,5,6,6-Decafluoro-6-<br>[(trifluoroethenyl)oxy]hexanenitrile | 85733-06-0 | 120903-40-4 | 609818-38-4 | 80962-91-0 | 40573-09-9 | 13846-22-5 | 84145-18-6 | 6037-91-8 | 1998-53-4 | 29514-94-1 | 1644-11-7 | 69804-19-9 | 16090-14-5 | 2599-84-0 | 64080-43-9 | 346662-93-9 | 369371-47-1 | 700874-87-9 | 13845-92-6 | 61097-79-8 | 17256-52-9 | 1840-17-1 | 690-27-7 | 424-32-8 | 93894-55-4 | 375-63-3 | 691358-66-4 | 1427-89-0 | 66577-33-1 | 423-66-5 | 66563-68-6 | 375-97-3 | 375-94-0 | 125370-60-7 | 335-65-9 | 307-99-3 | NOCAS_871634 | 2993-85-3 | 1737-33-3 | 355-37-3 | 336-07-2 | 375-61-1 | 2648-47-7 | 423-31-4 | 376-84-1 | 16059-16-8 |
| QL03437 | Perfluoro(2-bromoethoxy)ethene<br>2,2,3,3,4,4,5,5,6,6-Decafluoro-6-<br>[(trifluoroethenyl)oxy]hexanenitrile | 85733-06-0 | 120903-40-4 | 609818-38-4 | 80962-91-0 | 40573-09-9 | 13846-22-5 | 84145-18-6 | 6037-91-8 | 1998-53-4 | 29514-94-1 | 1644-11-7 | 69804-19-9 | 16090-14-5 | 2599-84-0 | 64080-43-9 | 346662-93-9 | 369371-47-1 | 700874-87-9 | 13845-92-6 | 61097-79-8 | 17256-52-9 | 1840-17-1 | 690-27-7 | 424-32-8 | 93894-55-4 | 375-63-3 | 691358-66-4 | 1427-89-0 | 66577-33-1 | 423-66-5 | 66563-68-6 | 375-97-3 | 375-94-0 | 125370-60-7 | 335-65-9 | 307-99-3 | NOCAS_871634 | 2993-85-3 | 1737-33-3 | 355-37-3 | 336-07-2 | 375-61-1 | 2648-47-7 | 423-31-4 | 376-84-1 | 16059-16-8 |
| QL03438 | Perfluoro(2-bromoethoxy)ethene<br>2,2,3,3,4,4,5,5,6,6-Decafluoro-6-<br>[(trifluoroethenyl)oxy]hexanenitrile | 85733-06-0 | 120903-40-4 | 609818-38-4 | 80962-91-0 | 40573-09-9 | 13846-22-5 | 84145-18-6 | 6037-91-8 | 1998-53-4 | 29514-94-1 | 1644-11-7 | 69804-19-9 | 16090-14-5 | 2599-84-0 | 64080-43-9 | 346662-93-9 | 369371-47-1 | 700874-87-9 | 13845-92-6 | 61097-79-8 | 17256-52-9 | 1840-17-1 | 690-27-7 | 424-32-8 | 93894-55-4 | 375-63-3 | 691358-66-4 | 1427-89-0 | 66577-33-1 | 423-66-5 | 66563-68-6 | 375-97-3 | 375-94-0 | 125370-60-7 | 335-65-9 | 307-99-3 | NOCAS_871634 | 2993-85-3 | 1737-33-3 | 355-37-3 | 336-07-2 | 375-61-1 | 2648-47-7 | 423-31-4 | 376-84-1 | 16059-16-8 |
| QL03439 | Perfluoro(2-bromoethoxy)ethene<br>2,2,3,3,4,4,5,5,6,6-Decafluoro-6-<br>[(trifluoroethenyl)oxy]hexanenitrile | 85733-06-0 | 120903-40-4 | 609818-38-4 | 80962-91-0 | 40573-09-9 | 13846-22-5 | 84145-18-6 | 6037-91-8 | 1998-53-4 | 29514-94-1 | 1644-11-7 | 69804-19-9 | 16090-14-5 | 2599-84-0 | 64080-43-9 | 346662-93-9 | 369371-47-1 | 700874-87-9 | 13845-92-6 | 61097-79-8 | 17256-52-9 | 1840-17-1 | 690-27-7 | 424-32-8 | 93894-55-4 | 375-63-3 | 691358-66-4 | 1427-89-0 | 66577-33-1 | 423-66-5 | 66563-68-6 | 375-97-3 | 375-94-0 | 125370-60-7 | 335-65-9 | 307-99-3 | NOCAS_871634 | 2993-85-3 | 1737-33-3 | 355-37-3 | 336-07-2 | 375-61-1 | 2648-47-7 | 423-31-4 | 376-84-1 | 16059-16-8 |
| QL03440 | Perfluoro(2-bromoethoxy)ethene<br>2,2,3,3,4,4,5,5,6,6-Decafluoro-6-<br>[(trifluoroethenyl)oxy]hexanenitrile | 85733-06-0 | 120903-40-4 | 609818-38-4 | 80962-91-0 | 40573-09-9 | 13846-22-5 | 84145-18-6 | 6037-91-8 | 1998-53-4 | 29514-94-1 | 1644-11-7 | 69804-19-9 | 16090-14-5 | 2599-84-0 | 64080-43-9 | 346662-93-9 | 369371-47-1 | 700874-87-9 | 13845-92-6 | 61097-79-8 | 17256-52-9 | 1840-17-1 | 690-27-7 | 424-32-8 | 93894-55-4 | 375-63-3 | 691358-66-4 | 1427-89-0 | 66577-33-1 | 423-66-5 | 66563-68-6 | 375-97-3 | 375-94-0 | 125370-60-7 | 335-65-9 | 307-99-3 | NOCAS_871634 | 2993-85-3 | 1737-33-3 | 355-37-3 | 336-07-2 | 375-61-1 | 2648-47-7 | 423-31-4 | 376-84-1 | 16059-16-8 |
| QL03441 | Perfluoro(2-bromoethoxy)ethene<br>2,2,3,3,4,4,5,5,6,6-Decafluoro-6-<br>[(trifluoroethenyl)oxy]hexanenitrile | 85733-06-0 | 120903-40-4 | 609818-38-4 | 80962-91-0 | 40573-09-9 | 13846-22-5 | 84145-18-6 | 6037-91-8 | 1998-53-4 | 29514-94-1 | 1644-11-7 | 69804-19-9 | 16090-14-5 | 2599-84-0 | 64080-43-9 | 346662-93-9 | 369371-47-1 | 700874-87-9 | 13845-92-6 | 61097-79-8 | 17256-52-9 | 1840-17-1 | 690-27-7 | 424-32-8 | 93894-55-4 | 375-63-3 | 691358-66-4 | 1427-89-0 | 66577-33-1 | 423-66-5 | 66563-68-6 | 375-97-3 | 375-94-0 |             |          |          |              |           |           |          |          |          |           |          |          |            |







[illegible]







|         |                                                                     |            |                                                                                                                                                                                                                                                                                                                                                                                                                                                                                                                                                                                                                                                                                                                                                                                                                                                                                                                                                                                                                                                                                                                                                                                                                                                                                                                                                                                                                                                                                                                                                                                                                                                                                                                                                                                                                                                                                                                                                                                                                                                                                                                                                                                                                                                                                                                                                                                                                                                                                                                                                                                                                                                                                                                                                                                                                                                                                                                                                                                                                                                                                                                                                                                                                                                                                                                                                                                                                                                                                                                                                                                                                                                                                                                                                                                                                                                                                                                                                                                                                                                                                                                                                                                                                                                                                                                                                                                                                                                                                                                                                                                                                                                                                                                                                                                                                                                                                                                                                                                                                                                                                                                                                                                                                                                                                                                                                                                                                                                                                                                                                                                                                                                                                                                                                                                                                                                                                                                                                                                                                                                                                                                                                                                                                                                                                                                                                                                                                                                                                                                                                                                                                                                                                                                                                                                                                                                                                                                                                                                                                                                                                                                                                                                                                                                                                                                                                                                                                                                                                                                                                                                                                                                                                                                                                                                                                                                                                                                                                                                                                                                                                                                                                                                                                                                                                                                                                                                                                                                                                                                                                                                                                                                                                                                                                                                                                                                                                                                                                                                                                                                                                                                                                                                                                                                                                                                                                                                                                                                                                                                                                                                                                                                                                                                                                                                                                                                                                                                                                                                                                                                                                                                                                                                                                                                                                                                                                                                                                                                                                                                                                                                                                                                                                                                                                                                                                                                                                                                                                                                                                                                                                                                                                                                                                                                                                                                                                                                                                                                                                                                                                                                                                                                                                                                                                                                                                                                                                                                                                                                                                                                                                                                                                                                                                                                                                                                                                                                                                                                                                                                                                                                                                                                                                       |
|---------|---------------------------------------------------------------------|------------|---------------------------------------------------------------------------------------------------------------------------------------------------------------------------------------------------------------------------------------------------------------------------------------------------------------------------------------------------------------------------------------------------------------------------------------------------------------------------------------------------------------------------------------------------------------------------------------------------------------------------------------------------------------------------------------------------------------------------------------------------------------------------------------------------------------------------------------------------------------------------------------------------------------------------------------------------------------------------------------------------------------------------------------------------------------------------------------------------------------------------------------------------------------------------------------------------------------------------------------------------------------------------------------------------------------------------------------------------------------------------------------------------------------------------------------------------------------------------------------------------------------------------------------------------------------------------------------------------------------------------------------------------------------------------------------------------------------------------------------------------------------------------------------------------------------------------------------------------------------------------------------------------------------------------------------------------------------------------------------------------------------------------------------------------------------------------------------------------------------------------------------------------------------------------------------------------------------------------------------------------------------------------------------------------------------------------------------------------------------------------------------------------------------------------------------------------------------------------------------------------------------------------------------------------------------------------------------------------------------------------------------------------------------------------------------------------------------------------------------------------------------------------------------------------------------------------------------------------------------------------------------------------------------------------------------------------------------------------------------------------------------------------------------------------------------------------------------------------------------------------------------------------------------------------------------------------------------------------------------------------------------------------------------------------------------------------------------------------------------------------------------------------------------------------------------------------------------------------------------------------------------------------------------------------------------------------------------------------------------------------------------------------------------------------------------------------------------------------------------------------------------------------------------------------------------------------------------------------------------------------------------------------------------------------------------------------------------------------------------------------------------------------------------------------------------------------------------------------------------------------------------------------------------------------------------------------------------------------------------------------------------------------------------------------------------------------------------------------------------------------------------------------------------------------------------------------------------------------------------------------------------------------------------------------------------------------------------------------------------------------------------------------------------------------------------------------------------------------------------------------------------------------------------------------------------------------------------------------------------------------------------------------------------------------------------------------------------------------------------------------------------------------------------------------------------------------------------------------------------------------------------------------------------------------------------------------------------------------------------------------------------------------------------------------------------------------------------------------------------------------------------------------------------------------------------------------------------------------------------------------------------------------------------------------------------------------------------------------------------------------------------------------------------------------------------------------------------------------------------------------------------------------------------------------------------------------------------------------------------------------------------------------------------------------------------------------------------------------------------------------------------------------------------------------------------------------------------------------------------------------------------------------------------------------------------------------------------------------------------------------------------------------------------------------------------------------------------------------------------------------------------------------------------------------------------------------------------------------------------------------------------------------------------------------------------------------------------------------------------------------------------------------------------------------------------------------------------------------------------------------------------------------------------------------------------------------------------------------------------------------------------------------------------------------------------------------------------------------------------------------------------------------------------------------------------------------------------------------------------------------------------------------------------------------------------------------------------------------------------------------------------------------------------------------------------------------------------------------------------------------------------------------------------------------------------------------------------------------------------------------------------------------------------------------------------------------------------------------------------------------------------------------------------------------------------------------------------------------------------------------------------------------------------------------------------------------------------------------------------------------------------------------------------------------------------------------------------------------------------------------------------------------------------------------------------------------------------------------------------------------------------------------------------------------------------------------------------------------------------------------------------------------------------------------------------------------------------------------------------------------------------------------------------------------------------------------------------------------------------------------------------------------------------------------------------------------------------------------------------------------------------------------------------------------------------------------------------------------------------------------------------------------------------------------------------------------------------------------------------------------------------------------------------------------------------------------------------------------------------------------------------------------------------------------------------------------------------------------------------------------------------------------------------------------------------------------------------------------------------------------------------------------------------------------------------------------------------------------------------------------------------------------------------------------------------------------------------------------------------------------------------------------------------------------------------------------------------------------------------------------------------------------------------------------------------------------------------------------------------------------------------------------------------------------------------------------------------------------------------------------------------------------------------------------------------------------------------------------------------------------------------------------------------------------------------------------------------------------------------------------------------------------------------------------------------------------------------------------------------------------------------------------------------------------------------------------------------------------------------------------------------------------------------------------------------------------------------------------------------------------------------------------------------------------------------------------------------------------------------------------------------------------------------------------------------------------------------------------------------------------------------------------------------------------------------------------------------------------------------------------------------------------------------------------------------------------------------------------------------------------------------------------------------------------------------------------------------------------------------------------------------------------------------------------------------------------------------------------------------------------------------------------------------------------------------------------------------------------------------------------------------------------------------------------------------------------------------------------------------------------------------------------------------------------------------------------------------------------------------------------------------------------------------------------------------------------------------------------------------------------------------------------------------------------------------------------------------------------------------------------------------------------------------------------------------------------------------------------------------------------------------------------------------------------------------------------------------------------------------------------------------------------------------------------------------------------------------------------------------------------------------------------------------------------------------------------------------------------------------------------------------------------------------------------------------------------------------------------------------------------------------------------------------------------------------------------------------------------------------------------------------------------------------------------------------|
| QL03603 | 2-Fluoro-4,6-bis(1,1,2,3,3,3-heptafluoropropan-2-yl)-1,3,5-triazine | 10271-36-0 | Fc1nc(nc(n1)C(F)(F)(F)C(F)(F)C(F)(F)C(F)(F)C(F)(F)C(F)(F)C(F)(F)C(F)(F)C(F)(F)C(F)(F)C(F)(F)C(F)(F)C(F)(F)C(F)(F)C(F)(F)C(F)(F)C(F)(F)C(F)(F)C(F)(F)C(F)(F)C(F)(F)C(F)(F)C(F)(F)C(F)(F)C(F)(F)C(F)(F)C(F)(F)C(F)(F)C(F)(F)C(F)(F)C(F)(F)C(F)(F)C(F)(F)C(F)(F)C(F)(F)C(F)(F)C(F)(F)C(F)(F)C(F)(F)C(F)(F)C(F)(F)C(F)(F)C(F)(F)C(F)(F)C(F)(F)C(F)(F)C(F)(F)C(F)(F)C(F)(F)C(F)(F)C(F)(F)C(F)(F)C(F)(F)C(F)(F)C(F)(F)C(F)(F)C(F)(F)C(F)(F)C(F)(F)C(F)(F)C(F)(F)C(F)(F)C(F)(F)C(F)(F)C(F)(F)C(F)(F)C(F)(F)C(F)(F)C(F)(F)C(F)(F)C(F)(F)C(F)(F)C(F)(F)C(F)(F)C(F)(F)C(F)(F)C(F)(F)C(F)(F)C(F)(F)C(F)(F)C(F)(F)C(F)(F)C(F)(F)C(F)(F)C(F)(F)C(F)(F)C(F)(F)C(F)(F)C(F)(F)C(F)(F)C(F)(F)C(F)(F)C(F)(F)C(F)(F)C(F)(F)C(F)(F)C(F)(F)C(F)(F)C(F)(F)C(F)(F)C(F)(F)C(F)(F)C(F)(F)C(F)(F)C(F)(F)C(F)(F)C(F)(F)C(F)(F)C(F)(F)C(F)(F)C(F)(F)C(F)(F)C(F)(F)C(F)(F)C(F)(F)C(F)(F)C(F)(F)C(F)(F)C(F)(F)C(F)(F)C(F)(F)C(F)(F)C(F)(F)C(F)(F)C(F)(F)C(F)(F)C(F)(F)C(F)(F)C(F)(F)C(F)(F)C(F)(F)C(F)(F)C(F)(F)C(F)(F)C(F)(F)C(F)(F)C(F)(F)C(F)(F)C(F)(F)C(F)(F)C(F)(F)C(F)(F)C(F)(F)C(F)(F)C(F)(F)C(F)(F)C(F)(F)C(F)(F)C(F)(F)C(F)(F)C(F)(F)C(F)(F)C(F)(F)C(F)(F)C(F)(F)C(F)(F)C(F)(F)C(F)(F)C(F)(F)C(F)(F)C(F)(F)C(F)(F)C(F)(F)C(F)(F)C(F)(F)C(F)(F)C(F)(F)C(F)(F)C(F)(F)C(F)(F)C(F)(F)C(F)(F)C(F)(F)C(F)(F)C(F)(F)C(F)(F)C(F)(F)C(F)(F)C(F)(F)C(F)(F)C(F)(F)C(F)(F)C(F)(F)C(F)(F)C(F)(F)C(F)(F)C(F)(F)C(F)(F)C(F)(F)C(F)(F)C(F)(F)C(F)(F)C(F)(F)C(F)(F)C(F)(F)C(F)(F)C(F)(F)C(F)(F)C(F)(F)C(F)(F)C(F)(F)C(F)(F)C(F)(F)C(F)(F)C(F)(F)C(F)(F)C(F)(F)C(F)(F)C(F)(F)C(F)(F)C(F)(F)C(F)(F)C(F)(F)C(F)(F)C(F)(F)C(F)(F)C(F)(F)C(F)(F)C(F)(F)C(F)(F)C(F)(F)C(F)(F)C(F)(F)C(F)(F)C(F)(F)C(F)(F)C(F)(F)C(F)(F)C(F)(F)C(F)(F)C(F)(F)C(F)(F)C(F)(F)C(F)(F)C(F)(F)C(F)(F)C(F)(F)C(F)(F)C(F)(F)C(F)(F)C(F)(F)C(F)(F)C(F)(F)C(F)(F)C(F)(F)C(F)(F)C(F)(F)C(F)(F)C(F)(F)C(F)(F)C(F)(F)C(F)(F)C(F)(F)C(F)(F)C(F)(F)C(F)(F)C(F)(F)C(F)(F)C(F)(F)C(F)(F)C(F)(F)C(F)(F)C(F)(F)C(F)(F)C(F)(F)C(F)(F)C(F)(F)C(F)(F)C(F)(F)C(F)(F)C(F)(F)C(F)(F)C(F)(F)C(F)(F)C(F)(F)C(F)(F)C(F)(F)C(F)(F)C(F)(F)C(F)(F)C(F)(F)C(F)(F)C(F)(F)C(F)(F)C(F)(F)C(F)(F)C(F)(F)C(F)(F)C(F)(F)C(F)(F)C(F)(F)C(F)(F)C(F)(F)C(F)(F)C(F)(F)C(F)(F)C(F)(F)C(F)(F)C(F)(F)C(F)(F)C(F)(F)C(F)(F)C(F)(F)C(F)(F)C(F)(F)C(F)(F)C(F)(F)C(F)(F)C(F)(F)C(F)(F)C(F)(F)C(F)(F)C(F)(F)C(F)(F)C(F)(F)C(F)(F)C(F)(F)C(F)(F)C(F)(F)C(F)(F)C(F)(F)C(F)(F)C(F)(F)C(F)(F)C(F)(F)C(F)(F)C(F)(F)C(F)(F)C(F)(F)C(F)(F)C(F)(F)C(F)(F)C(F)(F)C(F)(F)C(F)(F)C(F)(F)C(F)(F)C(F)(F)C(F)(F)C(F)(F)C(F)(F)C(F)(F)C(F)(F)C(F)(F)C(F)(F)C(F)(F)C(F)(F)C(F)(F)C(F)(F)C(F)(F)C(F)(F)C(F)(F)C(F)(F)C(F)(F)C(F)(F)C(F)(F)C(F)(F)C(F)(F)C(F)(F)C(F)(F)C(F)(F)C(F)(F)C(F)(F)C(F)(F)C(F)(F)C(F)(F)C(F)(F)C(F)(F)C(F)(F)C(F)(F)C(F)(F)C(F)(F)C(F)(F)C(F)(F)C(F)(F)C(F)(F)C(F)(F)C(F)(F)C(F)(F)C(F)(F)C(F)(F)C(F)(F)C(F)(F)C(F)(F)C(F)(F)C(F)(F)C(F)(F)C(F)(F)C(F)(F)C(F)(F)C(F)(F)C(F)(F)C(F)(F)C(F)(F)C(F)(F)C(F)(F)C(F)(F)C(F)(F)C(F)(F)C(F)(F)C(F)(F)C(F)(F)C(F)(F)C(F)(F)C(F)(F)C(F)(F)C(F)(F)C(F)(F)C(F)(F)C(F)(F)C(F)(F)C(F)(F)C(F)(F)C(F)(F)C(F)(F)C(F)(F)C(F)(F)C(F)(F)C(F)(F)C(F)(F)C(F)(F)C(F)(F)C(F)(F)C(F)(F)C(F)(F)C(F)(F)C(F)(F)C(F)(F)C(F)(F)C(F)(F)C(F)(F)C(F)(F)C(F)(F)C(F)(F)C(F)(F)C(F)(F)C(F)(F)C(F)(F)C(F)(F)C(F)(F)C(F)(F)C(F)(F)C(F)(F)C(F)(F)C(F)(F)C(F)(F)C(F)(F)C(F)(F)C(F)(F)C(F)(F)C(F)(F)C(F)(F)C(F)(F)C(F)(F)C(F)(F)C(F)(F)C(F)(F)C(F)(F)C(F)(F)C(F)(F)C(F)(F)C(F)(F)C(F)(F)C(F)(F)C(F)(F)C(F)(F)C(F)(F)C(F)(F)C(F)(F)C(F)(F)C(F)(F)C(F)(F)C(F)(F)C(F)(F)C(F)(F)C(F)(F)C(F)(F)C(F)(F)C(F)(F)C(F)(F)C(F)(F)C(F)(F)C(F)(F)C(F)(F)C(F)(F)C(F)(F)C(F)(F)C(F)(F)C(F)(F)C(F)(F)C(F)(F)C(F)(F)C(F)(F)C(F)(F)C(F)(F)C(F)(F)C(F)(F)C(F)(F)C(F)(F)C(F)(F)C(F)(F)C(F)(F)C(F)(F)C(F)(F)C(F)(F)C(F)(F)C(F)(F)C(F)(F)C(F)(F)C(F)(F)C(F)(F)C(F)(F)C(F)(F)C(F)(F)C(F)(F)C(F)(F)C(F)(F)C(F)(F)C(F)(F)C(F)(F)C(F)(F)C(F)(F)C(F)(F)C(F)(F)C(F)(F)C(F)(F)C(F)(F)C(F)(F)C(F)(F)C(F)(F)C(F)(F)C(F)(F)C(F)(F)C(F)(F)C(F)(F)C(F)(F)C(F)(F)C(F)(F)C(F)(F)C(F)(F)C(F)(F)C(F)(F)C(F)(F)C(F)(F)C(F)(F)C(F)(F)C(F)(F)C(F)(F)C(F)(F)C(F)(F)C(F)(F)C(F)(F)C(F)(F)C(F)(F)C(F)(F)C(F)(F)C(F)(F)C(F)(F)C(F)(F)C(F)(F)C(F)(F)C(F)(F)C(F)(F)C(F)(F)C(F)(F)C(F)(F)C(F)(F)C(F)(F)C(F)(F)C(F)(F)C(F)(F)C(F)(F)C(F)(F)C(F)(F)C(F)(F)C(F)(F)C(F)(F)C(F)(F)C(F)(F)C(F)(F)C(F)(F)C(F)(F)C(F)(F)C(F)(F)C(F)(F)C(F)(F)C(F)(F)C(F)(F)C(F)(F)C(F)(F)C(F)(F)C(F)(F)C(F)(F)C(F)(F)C(F)(F)C(F)(F)C(F)(F)C(F)(F)C(F)(F)C(F)(F)C(F)(F)C(F)(F)C(F)(F)C(F)(F)C(F)(F)C(F)(F)C(F)(F)C(F)(F)C(F)(F)C(F)(F)C(F)(F)C(F)(F)C(F)(F)C(F)(F)C(F)(F)C(F)(F)C(F)(F)C(F)(F)C(F)(F)C(F)(F)C(F)(F)C(F)(F)C(F)(F)C(F)(F)C(F)(F)C(F)(F)C(F)(F)C(F)(F)C(F)(F)C(F)(F)C(F)(F)C(F)(F)C(F)(F)C(F)(F)C(F)(F)C(F)(F)C(F)(F)C(F)(F)C(F)(F)C(F)(F)C(F)(F)C(F)(F)C(F)(F)C(F)(F)C(F)(F)C(F)(F)C(F)(F)C(F)(F)C(F)(F)C(F)(F)C(F)(F)C(F)(F)C(F)(F)C(F)(F)C(F)(F)C(F)(F)C(F)(F)C(F)(F)C(F)(F)C(F)(F)C(F)(F)C(F)(F)C(F)(F)C(F)(F)C(F)(F)C(F)(F)C(F)(F)C(F)(F)C(F)(F)C(F)(F)C(F)(F)C(F)(F)C(F)(F)C(F)(F)C(F)(F)C(F)(F)C(F)(F)C(F)(F)C(F)(F)C(F)(F)C(F)(F)C(F)(F)C(F)(F)C(F)(F)C(F)(F)C(F)(F)C(F)(F)C(F)(F)C(F)(F)C(F)(F)C(F)(F)C(F)(F)C(F)(F)C(F)(F)C(F)(F)C(F)(F)C(F)(F)C(F)(F)C(F)(F)C(F)(F)C(F)(F)C(F)(F)C(F)(F)C(F)(F)C(F)(F)C(F)(F)C(F)(F)C(F)(F)C(F)(F)C(F)(F)C(F)(F)C(F)(F)C(F)(F)C(F)(F)C(F)(F)C(F)(F)C(F)(F)C(F)(F)C(F)(F)C(F)(F)C(F)(F)C(F)(F)C(F)(F)C(F)(F)C(F)(F)C(F)(F)C(F)(F)C(F)(F)C(F)(F)C(F)(F)C(F)(F)C(F)(F)C(F)(F)C(F)(F)C(F)(F)C(F)(F)C(F)(F)C(F)(F)C(F)(F)C(F)(F)C(F)(F)C(F)(F)C(F)(F)C(F)(F)C(F)(F)C(F)(F)C(F)(F)C(F)(F)C(F)(F)C(F)(F)C(F)(F)C(F)(F)C(F)(F)C(F)(F)C(F)(F)C(F)(F)C(F)(F)C(F)(F)C(F)(F)C(F)(F)C(F)(F)C(F)(F)C(F)(F)C(F)(F)C(F)(F)C(F)(F)C(F)(F)C(F)(F)C(F)(F)C(F)(F)C(F)(F)C(F)(F)C(F)(F)C(F)(F)C(F)(F)C(F)(F)C(F)(F)C(F)(F)C(F)(F)C(F)(F)C(F)(F)C(F)(F)C(F)(F)C(F)(F)C(F)(F)C(F)(F)C(F)(F)C(F)(F)C(F)(F)C(F)(F)C(F)(F)C(F)(F)C(F)(F)C(F)(F)C(F)(F)C(F)(F)C(F)(F)C(F)(F)C(F)(F)C(F)(F)C(F)(F)C(F)(F)C(F)(F)C(F)(F)C(F)(F)C(F)(F)C(F)(F)C(F)(F)C(F)(F)C(F)(F)C(F)(F)C(F)(F)C(F)(F)C(F)(F)C(F)(F)C(F)(F)C(F)(F)C(F)(F)C(F)(F)C(F)(F)C(F)(F)C(F)(F)C(F)(F)C(F)(F)C(F)(F)C(F)(F)C(F)(F)C(F)(F)C(F)(F)C(F)(F)C(F)(F)C(F)(F)C(F)(F)C(F)(F)C(F)(F)C(F)(F)C(F)(F)C(F)(F)C(F)(F)C(F)(F)C(F)(F)C(F)(F)C(F)(F)C(F)(F)C(F)(F)C(F)(F)C(F)(F)C(F)(F)C(F)(F)C(F)(F)C(F)(F)C(F)(F)C(F)(F)C(F)(F)C(F)(F)C(F)(F)C(F)(F)C(F)(F)C(F)(F)C(F)(F)C(F)(F)C(F)(F)C(F)(F)C(F)(F)C(F)(F)C(F)(F)C(F)(F)C(F)(F)C(F)(F)C(F)(F)C(F)(F)C(F)(F)C(F)(F)C(F)(F)C(F)(F)C(F)(F)C(F)(F)C(F)(F)C(F)(F)C(F)(F)C(F)(F)C(F)(F)C(F)(F)C(F)(F)C(F)(F)C(F)(F)C(F)(F)C(F)(F)C(F)(F)C(F)(F)C(F)(F)C(F)(F)C(F)(F)C(F)(F)C(F)(F)C(F)(F)C(F)(F)C(F)(F)C(F)(F)C(F)(F)C(F)(F)C(F)(F)C(F)(F)C(F)(F)C(F)(F)C(F)(F)C(F)(F)C(F)(F)C(F)(F)C(F)(F)C(F)(F)C(F)(F)C(F)(F)C(F)(F)C(F)(F)C(F)(F)C(F)(F)C(F)(F)C(F)(F)C(F)(F)C(F)(F)C(F)(F)C(F)(F)C(F)(F)C(F)(F)C(F)(F)C(F)(F)C(F)(F)C(F)(F)C(F)(F)C(F)(F)C(F)(F)C(F)(F)C(F)(F)C(F)(F)C(F)(F)C(F)(F)C(F)(F)C(F)(F)C(F)(F)C(F)(F)C(F)(F)C(F)(F)C(F)(F)C(F)(F)C(F)(F)C(F)(F)C(F)(F)C(F)(F)C(F)(F)C(F)(F)C(F)(F)C(F)(F)C(F)(F)C(F)(F)C(F)(F)C(F)(F)C(F)(F)C(F)(F)C(F)(F)C(F)(F)C(F)(F)C(F)(F)C(F)(F)C(F)(F)C(F)(F)C(F)(F)C(F)(F)C(F)(F)C(F)(F)C(F)(F)C(F)(F)C(F)(F)C(F)(F)C(F)(F)C(F)(F)C(F)(F)C(F)(F)C(F)(F)C(F)(F)C(F)(F)C(F)(F)C(F)(F)C(F)(F)C(F)(F)C(F)(F)C(F)(F)C(F)(F)C(F)(F)C(F)(F)C(F)(F)C(F)(F)C(F)(F)C(F)(F)C(F)(F)C(F)(F)C(F)(F)C(F)(F)C(F)(F)C(F)(F)C(F)(F)C(F)(F)C(F)(F)C(F)(F)C(F)(F)C(F)(F)C(F)(F)C(F)(F)C(F)(F)C(F)(F)C(F)(F)C(F)(F)C(F)(F)C(F)(F)C(F)(F)C(F)(F)C(F)(F)C(F)(F)C(F)(F)C(F)(F)C(F)(F)C(F)(F)C(F)(F)C(F)(F)C(F)(F)C(F)(F)C(F)(F)C(F)(F)C(F)(F)C(F)(F)C(F)(F)C(F)(F)C(F)(F)C(F)(F)C(F)(F)C(F)(F)C(F)(F)C(F)(F)C(F)(F)C(F)(F)C(F)(F)C(F)(F)C(F)(F)C(F)(F)C(F)(F)C(F)(F)C(F)(F)C(F)(F)C(F)(F)C(F)(F)C(F)(F)C(F)(F)C(F)(F)C(F)(F)C(F)(F)C(F)(F)C(F)(F)C(F)(F)C(F)(F)C(F)(F)C(F)(F)C(F)(F)C(F)(F)C(F)(F)C(F)(F)C(F)(F)C(F)(F)C(F)(F)C(F)(F)C(F)(F)C(F)(F)C(F)(F)C(F)(F)C(F)(F)C(F)(F)C(F)(F)C(F)(F)C(F)(F)C(F)(F)C(F)(F)C(F)(F)C(F)(F)C(F)(F)C(F)(F)C(F)(F)C(F)(F)C(F)(F)C(F)(F)C(F)(F)C(F)(F)C(F)(F)C(F)(F)C(F)(F)C(F)(F)C(F)(F)C(F)(F)C(F)(F)C(F)(F)C(F)(F)C(F)(F)C(F)(F)C(F)(F)C(F)(F)C(F)(F)C(F)(F)C(F)(F)C(F)(F)C(F)(F)C(F)(F)C(F)(F)C(F)(F)C(F)(F)C(F)(F)C(F)(F)C(F)(F)C(F)(F)C(F)(F)C(F)(F)C(F)(F)C(F)(F)C(F)(F)C(F)(F)C(F)(F)C(F)(F)C(F)(F)C(F)(F)C(F)(F)C(F)(F)C(F)(F)C(F)(F)C(F)(F)C(F)(F)C(F)(F)C(F)(F)C(F)(F)C(F)(F)C(F)(F)C(F)(F)C(F)(F)C(F)(F)C(F)(F)C(F)(F)C(F)(F)C(F)(F)C(F)(F)C(F)(F)C(F)(F)C(F)(F)C(F)(F)C(F)(F)C(F)(F)C(F)(F)C(F)(F)C(F)(F)C(F)(F)C(F)(F)C(F)(F)C(F)(F)C(F)(F)C(F)(F)C(F)(F)C(F)(F)C(F)(F)C(F)(F)C(F)(F)C(F)(F)C(F)(F)C(F)(F)C(F)(F)C(F)(F)C(F)(F)C(F)(F)C(F)(F)C(F)(F)C(F)(F)C(F)(F)C(F)(F)C(F)(F)C(F)(F)C(F)(F)C(F)(F)C(F)(F)C(F)(F)C(F)(F)C(F)(F)C(F)(F)C(F)(F)C(F)(F)C(F)(F)C(F)(F)C(F)(F)C(F)(F)C(F)(F)C(F)(F)C(F)(F)C(F)(F)C(F)(F)C(F)(F)C(F)(F)C(F)(F)C(F)(F)C(F)(F)C(F)(F)C(F)(F)C(F)(F)C(F)(F)C(F)(F)C(F)(F)C(F)(F)C(F)(F)C(F)(F)C(F)(F)C(F)(F)C(F)(F)C(F)(F)C(F)(F)C(F)(F)C(F)(F)C(F)(F)C(F)(F)C(F)(F)C(F)(F)C(F)(F)C(F)(F)C(F)(F)C(F)(F)C(F)(F)C(F)(F)C(F)(F)C(F)(F)C(F)(F)C(F)(F)C(F)(F)C(F)(F)C(F)(F)C(F)(F)C(F)(F)C(F)(F)C(F)(F)C(F)(F)C(F)(F)C(F)(F)C(F)(F)C(F)(F)C(F)(F)C(F)(F)C(F)(F)C(F)(F)C(F)(F)C(F)(F)C(F)(F)C(F)(F)C(F)(F)C(F)(F)C(F)(F)C(F)(F)C(F)(F)C(F)(F)C(F)(F)C(F)(F)C(F)(F)C(F)(F)C(F)(F)C(F)(F)C(F)(F)C(F)(F)C(F)(F)C(F)(F)C(F)(F)C(F)(F)C(F)(F)C(F)(F)C(F)(F)C(F)(F)C(F)(F)C(F)(F)C(F)(F)C(F)(F)C(F)(F)C(F)(F)C(F)(F)C(F)(F)C(F)(F)C(F)(F)C(F)(F)C(F)(F)C(F)(F)C(F)(F)C(F)(F)C(F)(F)C(F)(F)C(F)(F)C(F)(F)C(F)(F)C(F)(F)C(F)(F)C(F)(F)C(F)(F)C(F)(F)C(F)(F)C(F)(F)C(F)(F)C(F)(F)C(F)(F)C(F)(F)C(F)(F)C(F)(F)C(F)(F)C(F)(F)C(F)(F)C(F)(F)C(F)(F)C(F)(F)C(F)(F)C(F)(F)C(F)(F)C(F)(F)C(F)(F)C(F)(F)C(F)(F)C(F)(F)C(F)(F)C(F)(F)C(F)(F)C(F)(F)C(F)(F)C(F)(F)C(F)(F)C(F)(F)C(F)(F)C(F)(F)C(F)(F)C(F)(F)C(F)(F)C(F)(F)C(F)(F)C(F)(F)C(F)(F)C(F)(F)C(F)(F)C(F)(F)C(F)(F)C(F)(F)C(F)(F)C(F)(F)C(F)(F)C(F)(F)C(F)(F)C(F)(F)C(F)(F)C(F)(F)C(F)(F)C(F)(F)C(F)(F)C(F)(F)C(F)(F)C(F)(F)C(F)(F)C(F)(F)C(F)(F)C(F)(F)C(F)(F)C(F)(F)C(F)(F)C(F)(F)C(F)(F)C(F)(F)C(F)(F)C(F)(F)C(F)(F)C(F)(F)C(F)(F)C(F)(F)C(F)(F)C(F)(F)C(F)(F)C(F)(F)C(F)(F)C(F)(F)C(F)(F)C(F)(F)C(F)(F)C(F)(F)C(F)(F)C(F)(F)C(F)(F)C(F)(F)C(F)(F)C(F)(F)C(F)(F)C(F)(F)C(F)(F)C(F)(F)C(F)(F)C(F)(F)C(F)(F)C(F)(F)C(F)(F)C(F)(F)C(F)(F)C(F)(F)C(F)(F)C(F)(F)C(F)(F)C(F)(F)C(F)(F)C(F)(F)C(F)(F)C(F)(F)C(F)(F)C(F)(F)C(F)(F)C(F)(F)C(F)(F)C(F)(F)C(F)(F)C(F)(F)C(F)(F)C(F)(F)C(F)(F)C(F)(F)C(F)(F)C(F)(F)C(F)(F)C(F)(F)C(F)(F)C(F)(F)C(F)(F)C(F)(F)C(F)(F)C(F)(F)C(F)(F)C(F)(F)C(F)(F)C(F)(F)C(F)(F)C(F)(F)C(F)(F)C(F)(F)C(F)(F)C(F)(F)C(F)(F)C(F)(F)C(F)(F)C(F)(F)C(F)(F)C(F)(F)C(F)(F)C(F)(F)C(F)(F)C(F)(F)C(F)(F)C(F)(F)C(F)(F)C(F)(F)C(F)(F)C(F)(F)C(F)(F)C(F)(F)C(F)(F)C(F)(F)C(F)(F)C(F)(F)C(F)(F)C(F)(F)C(F)(F)C(F)(F)C(F)(F)C(F)(F)C(F)(F)C(F)(F)C(F)(F)C(F)(F)C(F)(F)C(F)(F)C(F)(F)C(F)(F)C(F)(F)C(F)(F)C(F)(F)C(F)(F)C(F)(F)C(F)(F)C(F)(F)C(F)(F)C(F)(F)C(F)(F)C(F)(F)C(F)(F)C(F)(F)C(F)(F)C(F)(F)C(F)(F)C(F)(F)C(F)(F)C(F)(F)C(F)(F)C(F)(F)C(F)(F)C(F)(F)C(F)(F)C(F)(F)C(F)(F)C(F)(F)C(F)(F)C(F)(F)C(F)(F)C(F)(F)C(F)(F)C(F)(F)C(F)(F)C(F)(F)C(F)(F)C(F)(F)C(F)(F)C(F)(F)C(F)(F)C(F)(F)C(F)(F)C(F)(F)C(F)(F)C(F)(F)C(F)(F)C(F)(F)C(F)(F)C(F)(F)C(F)(F)C(F)(F)C(F)(F)C(F)(F)C(F)(F)C(F)(F)C(F)(F)C(F)(F)C(F)(F)C(F)(F)C(F)(F)C(F)(F)C(F)(F)C(F)(F)C(F)(F)C(F)(F)C(F)(F)C(F)(F)C(F)(F)C(F)(F)C(F)(F)C(F)(F)C(F)(F)C(F)(F)C(F)(F)C(F)(F)C(F)(F)C(F)(F)C(F)(F)C(F)(F)C(F)(F)C(F)(F)C(F)(F)C(F)(F)C(F)(F)C(F)(F)C(F)(F)C(F)(F)C(F)(F)C(F)(F)C(F)(F)C(F)(F)C(F)(F)C(F)(F)C(F)(F)C(F)(F)C(F)(F)C(F)(F)C(F)(F)C(F)(F)C(F)(F)C(F)(F)C(F)(F)C(F)(F)C(F)(F)C(F)(F)C(F)(F)C(F)(F)C(F)(F)C(F)(F)C(F)(F)C(F)(F)C(F)(F)C(F)(F)C(F)(F)C(F)(F)C(F)(F)C(F)(F)C(F)(F)C(F)(F)C(F)(F)C(F)(F)C(F)(F)C(F)(F)C(F)(F)C(F)(F)C(F)(F)C(F)(F)C(F)(F)C(F)(F)C(F)(F)C(F)(F)C(F)(F)C(F)(F)C(F)(F)C(F)(F)C(F)(F)C(F)(F)C(F)(F)C(F)(F)C(F)(F)C(F)(F)C(F)(F)C(F)(F)C(F)(F)C(F)(F)C(F)(F)C(F)(F)C(F)(F)C(F)(F)C(F)(F)C(F)(F)C(F)(F)C(F)(F)C(F)(F)C(F)(F)C(F)(F)C(F)(F)C(F)(F)C(F)(F)C(F)(F)C(F)(F)C(F)(F)C(F)(F)C(F)(F)C(F)(F)C(F)(F)C(F)(F)C(F)(F)C(F)(F)C(F)(F)C(F)(F)C(F)(F)C(F)(F)C(F)(F)C(F)(F)C(F)(F)C(F)(F)C(F)(F)C(F)(F)C(F)(F)C(F)(F)C(F)(F)C(F)(F)C(F)(F)C(F)(F)C(F)(F)C(F)(F)C(F)(F)C(F)(F)C(F)(F)C(F)(F)C(F)(F)C(F)(F)C(F)(F)C(F)(F)C(F)(F)C(F)(F)C(F)(F)C(F)(F)C(F)(F)C(F)(F)C(F)(F)C(F)(F)C(F)(F)C(F)(F)C(F)(F)C(F)(F)C(F)(F)C(F)(F)C(F)(F)C(F)(F)C(F)(F)C(F)(F)C(F)(F)C(F)(F)C(F)(F)C(F)(F)C(F)(F)C(F)(F)C(F)(F)C(F)(F)C(F)(F)C(F)(F)C(F)(F)C(F)(F)C(F)(F)C(F)(F)C(F)(F)C(F)(F)C(F)(F)C(F)(F)C(F)(F)C(F)(F)C(F)(F)C(F)(F)C(F)(F)C(F)(F)C(F)(F)C(F)(F)C(F)(F)C(F)(F)C(F)(F)C(F)(F)C(F)(F)C(F)(F)C(F)(F)C(F)(F)C(F)(F)C(F)(F)C(F)(F)C(F)(F)C(F)(F)C(F)(F)C(F)(F)C(F)(F)C(F)(F)C(F)(F)C(F)(F)C(F)(F)C(F)(F)C(F)(F) |
|---------|---------------------------------------------------------------------|------------|---------------------------------------------------------------------------------------------------------------------------------------------------------------------------------------------------------------------------------------------------------------------------------------------------------------------------------------------------------------------------------------------------------------------------------------------------------------------------------------------------------------------------------------------------------------------------------------------------------------------------------------------------------------------------------------------------------------------------------------------------------------------------------------------------------------------------------------------------------------------------------------------------------------------------------------------------------------------------------------------------------------------------------------------------------------------------------------------------------------------------------------------------------------------------------------------------------------------------------------------------------------------------------------------------------------------------------------------------------------------------------------------------------------------------------------------------------------------------------------------------------------------------------------------------------------------------------------------------------------------------------------------------------------------------------------------------------------------------------------------------------------------------------------------------------------------------------------------------------------------------------------------------------------------------------------------------------------------------------------------------------------------------------------------------------------------------------------------------------------------------------------------------------------------------------------------------------------------------------------------------------------------------------------------------------------------------------------------------------------------------------------------------------------------------------------------------------------------------------------------------------------------------------------------------------------------------------------------------------------------------------------------------------------------------------------------------------------------------------------------------------------------------------------------------------------------------------------------------------------------------------------------------------------------------------------------------------------------------------------------------------------------------------------------------------------------------------------------------------------------------------------------------------------------------------------------------------------------------------------------------------------------------------------------------------------------------------------------------------------------------------------------------------------------------------------------------------------------------------------------------------------------------------------------------------------------------------------------------------------------------------------------------------------------------------------------------------------------------------------------------------------------------------------------------------------------------------------------------------------------------------------------------------------------------------------------------------------------------------------------------------------------------------------------------------------------------------------------------------------------------------------------------------------------------------------------------------------------------------------------------------------------------------------------------------------------------------------------------------------------------------------------------------------------------------------------------------------------------------------------------------------------------------------------------------------------------------------------------------------------------------------------------------------------------------------------------------------------------------------------------------------------------------------------------------------------------------------------------------------------------------------------------------------------------------------------------------------------------------------------------------------------------------------------------------------------------------------------------------------------------------------------------------------------------------------------------------------------------------------------------------------------------------------------------------------------------------------------------------------------------------------------------------------------------------------------------------------------------------------------------------------------------------------------------------------------------------------------------------------------------------------------------------------------------------------------------------------------------------------------------------------------------------------------------------------------------------------------------------------------------------------------------------------------------------------------------------------------------------------------------------------------------------------------------------------------------------------------------------------------------------------------------------------------------------------------------------------------------------------------------------------------------------------------------------------------------------------------------------------------------------------------------------------------------------------------------------------------------------------------------------------------------------------------------------------------------------------------------------------------------------------------------------------------------------------------------------------------------------------------------------------------------------------------------------------------------------------------------------------------------------------------------------------------------------------------------------------------------------------------------------------------------------------------------------------------------------------------------------------------------------------------------------------------------------------------------------------------------------------------------------------------------------------------------------------------------------------------------------------------------------------------------------------------------------------------------------------------------------------------------------------------------------------------------------------------------------------------------------------------------------------------------------------------------------------------------------------------------------------------------------------------------------------------------------------------------------------------------------------------------------------------------------------------------------------------------------------------------------------------------------------------------------------------------------------------------------------------------------------------------------------------------------------------------------------------------------------------------------------------------------------------------------------------------------------------------------------------------------------------------------------------------------------------------------------------------------------------------------------------------------------------------------------------------------------------------------------------------------------------------------------------------------------------------------------------------------------------------------------------------------------------------------------------------------------------------------------------------------------------------------------------------------------------------------------------------------------------------------------------------------------------------------------------------------------------------------------------------------------------------------------------------------------------------------------------------------------------------------------------------------------------------------------------------------------------------------------------------------------------------------------------------------------------------------------------------------------------------------------------------------------------------------------------------------------------------------------------------------------------------------------------------------------------------------------------------------------------------------------------------------------------------------------------------------------------------------------------------------------------------------------------------------------------------------------------------------------------------------------------------------------------------------------------------------------------------------------------------------------------------------------------------------------------------------------------------------------------------------------------------------------------------------------------------------------------------------------------------------------------------------------------------------------------------------------------------------------------------------------------------------------------------------------------------------------------------------------------------------------------------------------------------------------------------------------------------------------------------------------------------------------------------------------------------------------------------------------------------------------------------------------------------------------------------------------------------------------------------------------------------------------------------------------------------------------------------------------------------------------------------------------------------------------------------------------------------------------------------------------------------------------------------------------------------------------------------------------------------------------------------------------------------------------------------------------------------------------------------------------------------------------------------------------------------------------------------------------------------------------------------------------------------------------------------------------------------------------------------------------------------------------------------------------------------------------------------------------------------------------------------------------------------------------------------------------------------------------------------------------------------------------------------------------------------------------------------------------------------------------------------------------------------------------------------------------------------------------------------------------------------------------------------------------------------------------------------------------------------------------------------------------------------------------------------------------------------------------------------------------------------------------------------------------------------------------------------------------------------------------------------------------------------------------------------------------|



[illegible]



[illegible]



[illegible]



[illegible]



[illegible]



|         |                                                                                                                                                            |              |                                                                                                                                                                                                                                                                                                                                                                                                                                                                                                                                                                                                                                                                                                                                                                                                                                                                                                                                                                                                                                                                                                                                                                                                                                                                                                                                                                                                                                                                                                                                                                                                                                                                                                                                                                                                                                                                                                                                                                                                                                                                                                                                                                                                                                                                                                                                                                                                                                                                                                                                                                                                                                                                                                                                                                                                                                                                                                                                                                                                                                                                                                                                                                                                                                                                                                                                                                                                                                                                                                                                                                                                                                                                                                                                                                                                                                                                                                                                                                                                                                                                                                                                                                                                                                                                                                                                                                                                                                                                                                                                                                                                                                                                                                                                                                           |        |       |      |   |     |
|---------|------------------------------------------------------------------------------------------------------------------------------------------------------------|--------------|---------------------------------------------------------------------------------------------------------------------------------------------------------------------------------------------------------------------------------------------------------------------------------------------------------------------------------------------------------------------------------------------------------------------------------------------------------------------------------------------------------------------------------------------------------------------------------------------------------------------------------------------------------------------------------------------------------------------------------------------------------------------------------------------------------------------------------------------------------------------------------------------------------------------------------------------------------------------------------------------------------------------------------------------------------------------------------------------------------------------------------------------------------------------------------------------------------------------------------------------------------------------------------------------------------------------------------------------------------------------------------------------------------------------------------------------------------------------------------------------------------------------------------------------------------------------------------------------------------------------------------------------------------------------------------------------------------------------------------------------------------------------------------------------------------------------------------------------------------------------------------------------------------------------------------------------------------------------------------------------------------------------------------------------------------------------------------------------------------------------------------------------------------------------------------------------------------------------------------------------------------------------------------------------------------------------------------------------------------------------------------------------------------------------------------------------------------------------------------------------------------------------------------------------------------------------------------------------------------------------------------------------------------------------------------------------------------------------------------------------------------------------------------------------------------------------------------------------------------------------------------------------------------------------------------------------------------------------------------------------------------------------------------------------------------------------------------------------------------------------------------------------------------------------------------------------------------------------------------------------------------------------------------------------------------------------------------------------------------------------------------------------------------------------------------------------------------------------------------------------------------------------------------------------------------------------------------------------------------------------------------------------------------------------------------------------------------------------------------------------------------------------------------------------------------------------------------------------------------------------------------------------------------------------------------------------------------------------------------------------------------------------------------------------------------------------------------------------------------------------------------------------------------------------------------------------------------------------------------------------------------------------------------------------------------------------------------------------------------------------------------------------------------------------------------------------------------------------------------------------------------------------------------------------------------------------------------------------------------------------------------------------------------------------------------------------------------------------------------------------------------------------------|--------|-------|------|---|-----|
| QL03887 | 2,3,4,4,5,5,6,6-Nonafluoro-2,3-bis(trifluoromethyl)hexanoic acid                                                                                           | 1812247-18-9 | OC(=O)C(F)(C(F)(F)F)C(F)(C(F)(F)F)C(F)(C(F)(F)F)F                                                                                                                                                                                                                                                                                                                                                                                                                                                                                                                                                                                                                                                                                                                                                                                                                                                                                                                                                                                                                                                                                                                                                                                                                                                                                                                                                                                                                                                                                                                                                                                                                                                                                                                                                                                                                                                                                                                                                                                                                                                                                                                                                                                                                                                                                                                                                                                                                                                                                                                                                                                                                                                                                                                                                                                                                                                                                                                                                                                                                                                                                                                                                                                                                                                                                                                                                                                                                                                                                                                                                                                                                                                                                                                                                                                                                                                                                                                                                                                                                                                                                                                                                                                                                                                                                                                                                                                                                                                                                                                                                                                                                                                                                                                         | -7.85  | 57.69 | 1.84 | P | IN  |
| QL03888 | 2,3,3,5,5,5-Hexafluoro-2,4,4-tris(trifluoromethyl)pentanoic acid                                                                                           | 1882109-73-0 | OC(=O)C(F)(C(F)(F)F)C(F)C(F)(F)F(C(F)(F)C(F)(F)F)                                                                                                                                                                                                                                                                                                                                                                                                                                                                                                                                                                                                                                                                                                                                                                                                                                                                                                                                                                                                                                                                                                                                                                                                                                                                                                                                                                                                                                                                                                                                                                                                                                                                                                                                                                                                                                                                                                                                                                                                                                                                                                                                                                                                                                                                                                                                                                                                                                                                                                                                                                                                                                                                                                                                                                                                                                                                                                                                                                                                                                                                                                                                                                                                                                                                                                                                                                                                                                                                                                                                                                                                                                                                                                                                                                                                                                                                                                                                                                                                                                                                                                                                                                                                                                                                                                                                                                                                                                                                                                                                                                                                                                                                                                                         | -7.19  | 57.69 | 1.57 | P | IN  |
| QL03889 | 2,3,3,4,4,5,5,6,6,6-Nonafluoro-2,4-bis(trifluoromethyl)hexanoic acid                                                                                       | 1812247-19-0 | OC(=O)C(F)(C(F)(F)F)C(F)C(F)(F)C(F)(F)C(F)(F)F                                                                                                                                                                                                                                                                                                                                                                                                                                                                                                                                                                                                                                                                                                                                                                                                                                                                                                                                                                                                                                                                                                                                                                                                                                                                                                                                                                                                                                                                                                                                                                                                                                                                                                                                                                                                                                                                                                                                                                                                                                                                                                                                                                                                                                                                                                                                                                                                                                                                                                                                                                                                                                                                                                                                                                                                                                                                                                                                                                                                                                                                                                                                                                                                                                                                                                                                                                                                                                                                                                                                                                                                                                                                                                                                                                                                                                                                                                                                                                                                                                                                                                                                                                                                                                                                                                                                                                                                                                                                                                                                                                                                                                                                                                                            | -7.85  | 57.69 | 1.84 | P | IN  |
| QL03890 | 2,3,3,4,4,5,5,6,6,6-Nonafluoro-2,5-bis(trifluoromethyl)hexanoic acid                                                                                       | 1882109-80-9 | OC(=O)C(F)(C(F)(F)F)C(F)C(F)(F)C(F)(C(F)(F)C(F)(F)F)                                                                                                                                                                                                                                                                                                                                                                                                                                                                                                                                                                                                                                                                                                                                                                                                                                                                                                                                                                                                                                                                                                                                                                                                                                                                                                                                                                                                                                                                                                                                                                                                                                                                                                                                                                                                                                                                                                                                                                                                                                                                                                                                                                                                                                                                                                                                                                                                                                                                                                                                                                                                                                                                                                                                                                                                                                                                                                                                                                                                                                                                                                                                                                                                                                                                                                                                                                                                                                                                                                                                                                                                                                                                                                                                                                                                                                                                                                                                                                                                                                                                                                                                                                                                                                                                                                                                                                                                                                                                                                                                                                                                                                                                                                                      | -7.75  | 57.69 | 1.80 | P | IN  |
| QL03891 | 2,3,3,4,4,5,5,6,6,7,7,7-Dodecafluoro-2-(trifluoromethyl)heptanoic acid                                                                                     | 207678-51-1  | OC(=O)C(F)(C(F)(F)F)C(F)C(F)(F)C(F)(F)C(F)(F)C(F)(F)F                                                                                                                                                                                                                                                                                                                                                                                                                                                                                                                                                                                                                                                                                                                                                                                                                                                                                                                                                                                                                                                                                                                                                                                                                                                                                                                                                                                                                                                                                                                                                                                                                                                                                                                                                                                                                                                                                                                                                                                                                                                                                                                                                                                                                                                                                                                                                                                                                                                                                                                                                                                                                                                                                                                                                                                                                                                                                                                                                                                                                                                                                                                                                                                                                                                                                                                                                                                                                                                                                                                                                                                                                                                                                                                                                                                                                                                                                                                                                                                                                                                                                                                                                                                                                                                                                                                                                                                                                                                                                                                                                                                                                                                                                                                     | -8.53  | 57.69 | 2.12 | P | IN  |
| QL03892 | Perfluoroisobutyric acid                                                                                                                                   | 335-10-4     | OC(=O)C(F)(C(F)(F)F)F                                                                                                                                                                                                                                                                                                                                                                                                                                                                                                                                                                                                                                                                                                                                                                                                                                                                                                                                                                                                                                                                                                                                                                                                                                                                                                                                                                                                                                                                                                                                                                                                                                                                                                                                                                                                                                                                                                                                                                                                                                                                                                                                                                                                                                                                                                                                                                                                                                                                                                                                                                                                                                                                                                                                                                                                                                                                                                                                                                                                                                                                                                                                                                                                                                                                                                                                                                                                                                                                                                                                                                                                                                                                                                                                                                                                                                                                                                                                                                                                                                                                                                                                                                                                                                                                                                                                                                                                                                                                                                                                                                                                                                                                                                                                                     | -5.87  | 50.00 | 1.24 | P | IN  |
| QL03893 | Nonanoic acid, 2,4,6,8,9-pentachloro-2,3,3,4,5,5,6,7,7,8,9,9-dodecafluoro-2,2,4,4,5,5,5-Heptafluoro-3-(pentafluoroethyl)-3-(trifluoromethyl)pentanoic acid | 754-87-0     | OC(=O)C(F)(Cl)C(F)C(F)C(F)(Cl)C(F)C(F)(Cl)C(F)C(F)(Cl)C(F)F(Cl)                                                                                                                                                                                                                                                                                                                                                                                                                                                                                                                                                                                                                                                                                                                                                                                                                                                                                                                                                                                                                                                                                                                                                                                                                                                                                                                                                                                                                                                                                                                                                                                                                                                                                                                                                                                                                                                                                                                                                                                                                                                                                                                                                                                                                                                                                                                                                                                                                                                                                                                                                                                                                                                                                                                                                                                                                                                                                                                                                                                                                                                                                                                                                                                                                                                                                                                                                                                                                                                                                                                                                                                                                                                                                                                                                                                                                                                                                                                                                                                                                                                                                                                                                                                                                                                                                                                                                                                                                                                                                                                                                                                                                                                                                                           | -9.38  | 58.62 | 2.45 | P | IN  |
| QL03894 | 2,2,4,5,5,5-Hexafluoro-3,3,4-tris(trifluoromethyl)pentanoic acid                                                                                           | 1882109-67-2 | OC(=O)C(F)(F)C(C(F)(F)F)(C(F)(F)C(F)(F)F)C(F)(F)F                                                                                                                                                                                                                                                                                                                                                                                                                                                                                                                                                                                                                                                                                                                                                                                                                                                                                                                                                                                                                                                                                                                                                                                                                                                                                                                                                                                                                                                                                                                                                                                                                                                                                                                                                                                                                                                                                                                                                                                                                                                                                                                                                                                                                                                                                                                                                                                                                                                                                                                                                                                                                                                                                                                                                                                                                                                                                                                                                                                                                                                                                                                                                                                                                                                                                                                                                                                                                                                                                                                                                                                                                                                                                                                                                                                                                                                                                                                                                                                                                                                                                                                                                                                                                                                                                                                                                                                                                                                                                                                                                                                                                                                                                                                         | -7.37  | 57.69 | 1.64 | P | IN  |
| QL03895 | 2,2,4,4,5,5,6,6,6-Nonafluoro-3,3,3-tris(trifluoromethyl)pentanoic acid                                                                                     | 1882109-74-1 | OC(=O)C(F)(F)C(C(F)(F)F)(C(F)(F)F)C(F)(F)C(F)(F)F                                                                                                                                                                                                                                                                                                                                                                                                                                                                                                                                                                                                                                                                                                                                                                                                                                                                                                                                                                                                                                                                                                                                                                                                                                                                                                                                                                                                                                                                                                                                                                                                                                                                                                                                                                                                                                                                                                                                                                                                                                                                                                                                                                                                                                                                                                                                                                                                                                                                                                                                                                                                                                                                                                                                                                                                                                                                                                                                                                                                                                                                                                                                                                                                                                                                                                                                                                                                                                                                                                                                                                                                                                                                                                                                                                                                                                                                                                                                                                                                                                                                                                                                                                                                                                                                                                                                                                                                                                                                                                                                                                                                                                                                                                                         | -7.37  | 57.69 | 1.64 | P | IN  |
| QL03896 | 2,2,3,4,4,5,5,6,6,6-Nonafluoro-3,3-bis(trifluoromethyl)hexanoic acid                                                                                       | 1812247-20-3 | OC(=O)C(F)(F)C(C(F)(F)F)C(F)(F)C(F)(F)C(F)(F)F                                                                                                                                                                                                                                                                                                                                                                                                                                                                                                                                                                                                                                                                                                                                                                                                                                                                                                                                                                                                                                                                                                                                                                                                                                                                                                                                                                                                                                                                                                                                                                                                                                                                                                                                                                                                                                                                                                                                                                                                                                                                                                                                                                                                                                                                                                                                                                                                                                                                                                                                                                                                                                                                                                                                                                                                                                                                                                                                                                                                                                                                                                                                                                                                                                                                                                                                                                                                                                                                                                                                                                                                                                                                                                                                                                                                                                                                                                                                                                                                                                                                                                                                                                                                                                                                                                                                                                                                                                                                                                                                                                                                                                                                                                                            | -7.65  | 57.69 | 1.76 | P | IN  |
| QL03897 | 2,2,3,4,4,5,5,5-Octafluoro-3-(1,1,1,2,3,3,3-heptafluoropropan-2-yl)pentanoic acid                                                                          | 1882109-68-3 | OC(=O)C(F)(F)C(C(F)(C(F)(F)F)C(F)(F)C(F)(F)C(F)(F)F)                                                                                                                                                                                                                                                                                                                                                                                                                                                                                                                                                                                                                                                                                                                                                                                                                                                                                                                                                                                                                                                                                                                                                                                                                                                                                                                                                                                                                                                                                                                                                                                                                                                                                                                                                                                                                                                                                                                                                                                                                                                                                                                                                                                                                                                                                                                                                                                                                                                                                                                                                                                                                                                                                                                                                                                                                                                                                                                                                                                                                                                                                                                                                                                                                                                                                                                                                                                                                                                                                                                                                                                                                                                                                                                                                                                                                                                                                                                                                                                                                                                                                                                                                                                                                                                                                                                                                                                                                                                                                                                                                                                                                                                                                                                      | -7.41  | 57.69 | 1.66 | P | IN  |
| QL03898 | 2,2,3,4,4,5,5,6,6,6-Decafluoro-3-(pentafluoroethyl)hexanoic acid                                                                                           | 1882109-78-5 | OC(=O)C(F)(F)C(C(F)(C(F)(F)F)C(F)(F)C(F)(F)C(F)(F)F)                                                                                                                                                                                                                                                                                                                                                                                                                                                                                                                                                                                                                                                                                                                                                                                                                                                                                                                                                                                                                                                                                                                                                                                                                                                                                                                                                                                                                                                                                                                                                                                                                                                                                                                                                                                                                                                                                                                                                                                                                                                                                                                                                                                                                                                                                                                                                                                                                                                                                                                                                                                                                                                                                                                                                                                                                                                                                                                                                                                                                                                                                                                                                                                                                                                                                                                                                                                                                                                                                                                                                                                                                                                                                                                                                                                                                                                                                                                                                                                                                                                                                                                                                                                                                                                                                                                                                                                                                                                                                                                                                                                                                                                                                                                      | -7.85  | 57.69 | 1.84 | P | IN  |
| QL03899 | 2,2,3,5,5,5-Hexafluoro-3,4,4-tris(trifluoromethyl)pentanoic acid                                                                                           | 1882109-75-2 | OC(=O)C(F)(F)C(C(F)(F)F)C(F)(F)C(F)(F)C(F)(F)C(F)(F)F                                                                                                                                                                                                                                                                                                                                                                                                                                                                                                                                                                                                                                                                                                                                                                                                                                                                                                                                                                                                                                                                                                                                                                                                                                                                                                                                                                                                                                                                                                                                                                                                                                                                                                                                                                                                                                                                                                                                                                                                                                                                                                                                                                                                                                                                                                                                                                                                                                                                                                                                                                                                                                                                                                                                                                                                                                                                                                                                                                                                                                                                                                                                                                                                                                                                                                                                                                                                                                                                                                                                                                                                                                                                                                                                                                                                                                                                                                                                                                                                                                                                                                                                                                                                                                                                                                                                                                                                                                                                                                                                                                                                                                                                                                                     | -7.41  | 57.69 | 1.66 | P | IN  |
| QL03900 | 2,2,3,4,5,5,6,6,6-Nonafluoro-3,4-bis(trifluoromethyl)hexanoic acid                                                                                         | 1882109-81-0 | OC(=O)C(F)(F)C(C(F)(C(F)(F)F)C(F)(F)C(F)(F)F)C(F)(F)F                                                                                                                                                                                                                                                                                                                                                                                                                                                                                                                                                                                                                                                                                                                                                                                                                                                                                                                                                                                                                                                                                                                                                                                                                                                                                                                                                                                                                                                                                                                                                                                                                                                                                                                                                                                                                                                                                                                                                                                                                                                                                                                                                                                                                                                                                                                                                                                                                                                                                                                                                                                                                                                                                                                                                                                                                                                                                                                                                                                                                                                                                                                                                                                                                                                                                                                                                                                                                                                                                                                                                                                                                                                                                                                                                                                                                                                                                                                                                                                                                                                                                                                                                                                                                                                                                                                                                                                                                                                                                                                                                                                                                                                                                                                     | -7.65  | 57.69 | 1.76 | P | IN  |
| QL03901 | Perfluoro-3,5,5-trimethylhexanoic acid                                                                                                                     | 238403-51-5  | OC(=O)C(F)(F)C(F)(C(F)(F)F)C(F)C(C(F)(F)F)(C(F)(F)F)C(F)(F)F                                                                                                                                                                                                                                                                                                                                                                                                                                                                                                                                                                                                                                                                                                                                                                                                                                                                                                                                                                                                                                                                                                                                                                                                                                                                                                                                                                                                                                                                                                                                                                                                                                                                                                                                                                                                                                                                                                                                                                                                                                                                                                                                                                                                                                                                                                                                                                                                                                                                                                                                                                                                                                                                                                                                                                                                                                                                                                                                                                                                                                                                                                                                                                                                                                                                                                                                                                                                                                                                                                                                                                                                                                                                                                                                                                                                                                                                                                                                                                                                                                                                                                                                                                                                                                                                                                                                                                                                                                                                                                                                                                                                                                                                                                              | -7.82  | 58.62 | 1.80 | P | IN  |
| QL03902 | 2,2,3,4,4,5,6,6,6-Nonafluoro-3,5-bis(trifluoromethyl)hexanoic acid                                                                                         | 1144512-35-5 | OC(=O)C(F)(F)C(C(F)(F)F)C(F)(F)C(F)(F)C(F)(F)F                                                                                                                                                                                                                                                                                                                                                                                                                                                                                                                                                                                                                                                                                                                                                                                                                                                                                                                                                                                                                                                                                                                                                                                                                                                                                                                                                                                                                                                                                                                                                                                                                                                                                                                                                                                                                                                                                                                                                                                                                                                                                                                                                                                                                                                                                                                                                                                                                                                                                                                                                                                                                                                                                                                                                                                                                                                                                                                                                                                                                                                                                                                                                                                                                                                                                                                                                                                                                                                                                                                                                                                                                                                                                                                                                                                                                                                                                                                                                                                                                                                                                                                                                                                                                                                                                                                                                                                                                                                                                                                                                                                                                                                                                                                            | -7.85  | 57.69 | 1.84 | P | IN  |
| QL03903 | Perfluoro-3,7-dimethyloctanoic acid                                                                                                                        | 172155-07-6  | OC(=O)C(F)(F)C(C(F)(F)F)C(F)(F)C(F)(F)C(F)(C(F)(F)C(F)(F)F)                                                                                                                                                                                                                                                                                                                                                                                                                                                                                                                                                                                                                                                                                                                                                                                                                                                                                                                                                                                                                                                                                                                                                                                                                                                                                                                                                                                                                                                                                                                                                                                                                                                                                                                                                                                                                                                                                                                                                                                                                                                                                                                                                                                                                                                                                                                                                                                                                                                                                                                                                                                                                                                                                                                                                                                                                                                                                                                                                                                                                                                                                                                                                                                                                                                                                                                                                                                                                                                                                                                                                                                                                                                                                                                                                                                                                                                                                                                                                                                                                                                                                                                                                                                                                                                                                                                                                                                                                                                                                                                                                                                                                                                                                                               | -8.82  | 59.38 | 2.19 | P | IN  |
| QL03904 | 2,2,3,4,4,5,5,6,6,7,7,7-Dodecafluoro-3-(trifluoromethyl)heptanoic acid                                                                                     | 705240-04-6  | OC(=O)C(F)(F)C(C(F)(F)F)C(F)(F)C(F)(F)C(F)(F)F                                                                                                                                                                                                                                                                                                                                                                                                                                                                                                                                                                                                                                                                                                                                                                                                                                                                                                                                                                                                                                                                                                                                                                                                                                                                                                                                                                                                                                                                                                                                                                                                                                                                                                                                                                                                                                                                                                                                                                                                                                                                                                                                                                                                                                                                                                                                                                                                                                                                                                                                                                                                                                                                                                                                                                                                                                                                                                                                                                                                                                                                                                                                                                                                                                                                                                                                                                                                                                                                                                                                                                                                                                                                                                                                                                                                                                                                                                                                                                                                                                                                                                                                                                                                                                                                                                                                                                                                                                                                                                                                                                                                                                                                                                                            | -8.47  | 57.69 | 2.10 | P | IN  |
| QL03905 | 3,5,7,9,11,11-Hexachloro-2,2,3,4,4,5,6,6,7,8,8,9,10,10,11-pentadecafluoroundecanoic acid                                                                   | 53281-37-1   | OC(=O)C(F)(F)C(C(F)(Cl)C(F)(F)C(F)(Cl)C(F)C(F)(Cl)C(F)(F)C(F)(Cl)C(F)(F)C(F)(Cl)Cl)                                                                                                                                                                                                                                                                                                                                                                                                                                                                                                                                                                                                                                                                                                                                                                                                                                                                                                                                                                                                                                                                                                                                                                                                                                                                                                                                                                                                                                                                                                                                                                                                                                                                                                                                                                                                                                                                                                                                                                                                                                                                                                                                                                                                                                                                                                                                                                                                                                                                                                                                                                                                                                                                                                                                                                                                                                                                                                                                                                                                                                                                                                                                                                                                                                                                                                                                                                                                                                                                                                                                                                                                                                                                                                                                                                                                                                                                                                                                                                                                                                                                                                                                                                                                                                                                                                                                                                                                                                                                                                                                                                                                                                                                                       | -10.05 | 60.00 | 2.69 | P | IN  |
| QL03906 | 3,5,7,9-Pentachloro-2,2,3,4,4,5,6,6,7,8,8,9-dodecafluorononanoic acid                                                                                      | 53281-25-7   | OC(=O)C(F)(F)C(C(F)(Cl)C(F)(F)C(F)(Cl)C(F)C(F)(Cl)C(F)(F)C(F)(Cl)Cl)                                                                                                                                                                                                                                                                                                                                                                                                                                                                                                                                                                                                                                                                                                                                                                                                                                                                                                                                                                                                                                                                                                                                                                                                                                                                                                                                                                                                                                                                                                                                                                                                                                                                                                                                                                                                                                                                                                                                                                                                                                                                                                                                                                                                                                                                                                                                                                                                                                                                                                                                                                                                                                                                                                                                                                                                                                                                                                                                                                                                                                                                                                                                                                                                                                                                                                                                                                                                                                                                                                                                                                                                                                                                                                                                                                                                                                                                                                                                                                                                                                                                                                                                                                                                                                                                                                                                                                                                                                                                                                                                                                                                                                                                                                      | -9.38  | 58.62 | 2.45 | P | IN  |
| QL03907 | 3,5,7,8-Tetrachloroperfluorooctanoic acid                                                                                                                  | 2923-68-4    | OC(=O)C(F)(F)C(C(F)(Cl)C(F)(F)C(F)(Cl)C(F)(F)C(F)(Cl)C(F)(F)Cl)                                                                                                                                                                                                                                                                                                                                                                                                                                                                                                                                                                                                                                                                                                                                                                                                                                                                                                                                                                                                                                                                                                                                                                                                                                                                                                                                                                                                                                                                                                                                                                                                                                                                                                                                                                                                                                                                                                                                                                                                                                                                                                                                                                                                                                                                                                                                                                                                                                                                                                                                                                                                                                                                                                                                                                                                                                                                                                                                                                                                                                                                                                                                                                                                                                                                                                                                                                                                                                                                                                                                                                                                                                                                                                                                                                                                                                                                                                                                                                                                                                                                                                                                                                                                                                                                                                                                                                                                                                                                                                                                                                                                                                                                                                           | -8.81  | 57.69 | 2.24 | P | IN  |
| QL03908 | 3,5,7,7-Tetrachloro-2,2,3,4,4,5,6,6,7-nonafluoroheptanoic acid                                                                                             | 16069-78-6   | OC(=O)C(F)(F)C(C(F)(Cl)C(F)(F)C(F)(Cl)C(F)(F)C(F)(Cl)Cl)                                                                                                                                                                                                                                                                                                                                                                                                                                                                                                                                                                                                                                                                                                                                                                                                                                                                                                                                                                                                                                                                                                                                                                                                                                                                                                                                                                                                                                                                                                                                                                                                                                                                                                                                                                                                                                                                                                                                                                                                                                                                                                                                                                                                                                                                                                                                                                                                                                                                                                                                                                                                                                                                                                                                                                                                                                                                                                                                                                                                                                                                                                                                                                                                                                                                                                                                                                                                                                                                                                                                                                                                                                                                                                                                                                                                                                                                                                                                                                                                                                                                                                                                                                                                                                                                                                                                                                                                                                                                                                                                                                                                                                                                                                                  | -8.54  | 56.52 | 2.16 | P | IN  |
| QL03909 | 3,5,6-Trichloroperfluorohexanoic acid                                                                                                                      | 2106-54-9    | OC(=O)C(F)(F)C(C(F)(Cl)C(F)(F)C(F)(Cl)C(F)(F)Cl)                                                                                                                                                                                                                                                                                                                                                                                                                                                                                                                                                                                                                                                                                                                                                                                                                                                                                                                                                                                                                                                                                                                                                                                                                                                                                                                                                                                                                                                                                                                                                                                                                                                                                                                                                                                                                                                                                                                                                                                                                                                                                                                                                                                                                                                                                                                                                                                                                                                                                                                                                                                                                                                                                                                                                                                                                                                                                                                                                                                                                                                                                                                                                                                                                                                                                                                                                                                                                                                                                                                                                                                                                                                                                                                                                                                                                                                                                                                                                                                                                                                                                                                                                                                                                                                                                                                                                                                                                                                                                                                                                                                                                                                                                                                          | -7.81  | 55.00 | 1.90 | P | IN  |
| QL03910 | 2,2,3,3,5,5,5,6,6,6-Nonafluoro-4,4-bis(trifluoromethyl)hexanoic acid                                                                                       | 1192593-79-5 | OC(=O)C(F)(F)C(F)C(F)C(C(F)(F)F)C(F)(F)C(F)(F)C(F)(F)F                                                                                                                                                                                                                                                                                                                                                                                                                                                                                                                                                                                                                                                                                                                                                                                                                                                                                                                                                                                                                                                                                                                                                                                                                                                                                                                                                                                                                                                                                                                                                                                                                                                                                                                                                                                                                                                                                                                                                                                                                                                                                                                                                                                                                                                                                                                                                                                                                                                                                                                                                                                                                                                                                                                                                                                                                                                                                                                                                                                                                                                                                                                                                                                                                                                                                                                                                                                                                                                                                                                                                                                                                                                                                                                                                                                                                                                                                                                                                                                                                                                                                                                                                                                                                                                                                                                                                                                                                                                                                                                                                                                                                                                                                                                    | -7.65  | 57.69 | 1.76 | P | IN  |
| QL03911 | 2,2,3,3,4,5,5,6,6,6-Decafluoro-4-(pentafluoroethyl)hexanoic acid                                                                                           | 1882109-79-6 | OC(=O)C(F)(F)C(C(F)(F)C(F)(F)C(F)(F)F)C(F)(F)F                                                                                                                                                                                                                                                                                                                                                                                                                                                                                                                                                                                                                                                                                                                                                                                                                                                                                                                                                                                                                                                                                                                                                                                                                                                                                                                                                                                                                                                                                                                                                                                                                                                                                                                                                                                                                                                                                                                                                                                                                                                                                                                                                                                                                                                                                                                                                                                                                                                                                                                                                                                                                                                                                                                                                                                                                                                                                                                                                                                                                                                                                                                                                                                                                                                                                                                                                                                                                                                                                                                                                                                                                                                                                                                                                                                                                                                                                                                                                                                                                                                                                                                                                                                                                                                                                                                                                                                                                                                                                                                                                                                                                                                                                                                            | -7.85  | 57.69 | 1.84 | P | IN  |
| QL03912 | 2,2,3,3,4,5,6,6,6-Nonafluoro-4,5-bis(trifluoromethyl)hexanoic acid                                                                                         | 1144512-36-6 | OC(=O)C(F)(F)C(C(F)(F)C(F)(F)C(F)(F)C(F)(F)F)                                                                                                                                                                                                                                                                                                                                                                                                                                                                                                                                                                                                                                                                                                                                                                                                                                                                                                                                                                                                                                                                                                                                                                                                                                                                                                                                                                                                                                                                                                                                                                                                                                                                                                                                                                                                                                                                                                                                                                                                                                                                                                                                                                                                                                                                                                                                                                                                                                                                                                                                                                                                                                                                                                                                                                                                                                                                                                                                                                                                                                                                                                                                                                                                                                                                                                                                                                                                                                                                                                                                                                                                                                                                                                                                                                                                                                                                                                                                                                                                                                                                                                                                                                                                                                                                                                                                                                                                                                                                                                                                                                                                                                                                                                                             | -7.85  | 57.69 | 1.84 | P | IN  |
| QL03913 | 2,2,3,3,4,5,5,6,6,7,7,7-Dodecafluoro-4-(trifluoromethyl)heptanoic acid                                                                                     | 1144512-18-4 | OC(=O)C(F)(F)C(C(F)(F)C(F)(F)C(F)(F)C(F)(F)F)                                                                                                                                                                                                                                                                                                                                                                                                                                                                                                                                                                                                                                                                                                                                                                                                                                                                                                                                                                                                                                                                                                                                                                                                                                                                                                                                                                                                                                                                                                                                                                                                                                                                                                                                                                                                                                                                                                                                                                                                                                                                                                                                                                                                                                                                                                                                                                                                                                                                                                                                                                                                                                                                                                                                                                                                                                                                                                                                                                                                                                                                                                                                                                                                                                                                                                                                                                                                                                                                                                                                                                                                                                                                                                                                                                                                                                                                                                                                                                                                                                                                                                                                                                                                                                                                                                                                                                                                                                                                                                                                                                                                                                                                                                                             | -8.47  | 57.69 | 2.10 | P | IN  |
| QL03914 | 2,2,3,3,4,4,6,6,6-Nonafluoro-5,5-bis(trifluoromethyl)hexanoic acid                                                                                         | 1144512-34-4 | OC(=O)C(F)(F)C(C(F)(F)C(F)C(F)(F)C(F)(F)C(F)(F)F)                                                                                                                                                                                                                                                                                                                                                                                                                                                                                                                                                                                                                                                                                                                                                                                                                                                                                                                                                                                                                                                                                                                                                                                                                                                                                                                                                                                                                                                                                                                                                                                                                                                                                                                                                                                                                                                                                                                                                                                                                                                                                                                                                                                                                                                                                                                                                                                                                                                                                                                                                                                                                                                                                                                                                                                                                                                                                                                                                                                                                                                                                                                                                                                                                                                                                                                                                                                                                                                                                                                                                                                                                                                                                                                                                                                                                                                                                                                                                                                                                                                                                                                                                                                                                                                                                                                                                                                                                                                                                                                                                                                                                                                                                                                         | -7.75  | 57.69 | 1.80 | P | IN  |
| QL03915 | 2,2,3,3,4,4,5,6,6,7,7,7-Dodecafluoro-5-(trifluoromethyl)heptanoic acid                                                                                     | 909009-42-3  | OC(=O)C(F)(F)C(C(F)(F)C(F)(F)C(F)(F)C(F)(F)F)                                                                                                                                                                                                                                                                                                                                                                                                                                                                                                                                                                                                                                                                                                                                                                                                                                                                                                                                                                                                                                                                                                                                                                                                                                                                                                                                                                                                                                                                                                                                                                                                                                                                                                                                                                                                                                                                                                                                                                                                                                                                                                                                                                                                                                                                                                                                                                                                                                                                                                                                                                                                                                                                                                                                                                                                                                                                                                                                                                                                                                                                                                                                                                                                                                                                                                                                                                                                                                                                                                                                                                                                                                                                                                                                                                                                                                                                                                                                                                                                                                                                                                                                                                                                                                                                                                                                                                                                                                                                                                                                                                                                                                                                                                                             | -8.47  | 57.69 | 2.10 | P | IN  |
| QL03916 | Perfluoro-6-(trifluoromethyl)heptanoic acid                                                                                                                | 15166-06-0   | OC(=O)C(F)(F)C(C(F)(F)C(F)(F)C(F)(F)C(F)(F)F)                                                                                                                                                                                                                                                                                                                                                                                                                                                                                                                                                                                                                                                                                                                                                                                                                                                                                                                                                                                                                                                                                                                                                                                                                                                                                                                                                                                                                                                                                                                                                                                                                                                                                                                                                                                                                                                                                                                                                                                                                                                                                                                                                                                                                                                                                                                                                                                                                                                                                                                                                                                                                                                                                                                                                                                                                                                                                                                                                                                                                                                                                                                                                                                                                                                                                                                                                                                                                                                                                                                                                                                                                                                                                                                                                                                                                                                                                                                                                                                                                                                                                                                                                                                                                                                                                                                                                                                                                                                                                                                                                                                                                                                                                                                             | -8.53  | 57.69 | 2.12 | P | IN  |
| QL03917 | TP_8230                                                                                                                                                    |              | C(F)(F)C(F)(F)C(F)(F)C(F)(F)F                                                                                                                                                                                                                                                                                                                                                                                                                                                                                                                                                                                                                                                                                                                                                                                                                                                                                                                                                                                                                                                                                                                                                                                                                                                                                                                                                                                                                                                                                                                                                                                                                                                                                                                                                                                                                                                                                                                                                                                                                                                                                                                                                                                                                                                                                                                                                                                                                                                                                                                                                                                                                                                                                                                                                                                                                                                                                                                                                                                                                                                                                                                                                                                                                                                                                                                                                                                                                                                                                                                                                                                                                                                                                                                                                                                                                                                                                                                                                                                                                                                                                                                                                                                                                                                                                                                                                                                                                                                                                                                                                                                                                                                                                                                                             | -11.92 | 62.71 | 3.38 | P | OUT |
| QL03918 | Perfluorododecanoic acid (PFdODA)                                                                                                                          | 307-55-1     | OC(=O)C(F)(F)C(F)(F)C(F)(F)C(F)(F)C(F)(F)C(F)(F)C(F)(F)C(F)(F)C(F)(F)F                                                                                                                                                                                                                                                                                                                                                                                                                                                                                                                                                                                                                                                                                                                                                                                                                                                                                                                                                                                                                                                                                                                                                                                                                                                                                                                                                                                                                                                                                                                                                                                                                                                                                                                                                                                                                                                                                                                                                                                                                                                                                                                                                                                                                                                                                                                                                                                                                                                                                                                                                                                                                                                                                                                                                                                                                                                                                                                                                                                                                                                                                                                                                                                                                                                                                                                                                                                                                                                                                                                                                                                                                                                                                                                                                                                                                                                                                                                                                                                                                                                                                                                                                                                                                                                                                                                                                                                                                                                                                                                                                                                                                                                                                                    | -10.23 | 60.53 | 2.75 | P | OUT |
| QL03919 | Perfluoro-1,10-decanedicarboxylic acid                                                                                                                     | 865-85-0     | OC(=O)C(F)(F)C(F)(F)C(F)(F)C(F)(F)C(F)(F)C(F)(F)C(F)(F)C(F)(F)C(F)(F)C(F)(F)C(F)(F)C(F)(F)C(F)(F)C(F)(F)C(F)(F)C(F)(F)C(F)(F)C(F)(F)C(F)(F)C(F)(F)C(F)(F)C(F)(F)C(F)(F)C(F)(F)C(F)(F)C(F)(F)C(F)(F)C(F)(F)C(F)(F)C(F)(F)C(F)(F)C(F)(F)C(F)(F)C(F)(F)C(F)(F)C(F)(F)C(F)(F)C(F)(F)C(F)(F)C(F)(F)C(F)(F)C(F)(F)C(F)(F)C(F)(F)C(F)(F)C(F)(F)C(F)(F)C(F)(F)C(F)(F)C(F)(F)C(F)(F)C(F)(F)C(F)(F)C(F)(F)C(F)(F)C(F)(F)C(F)(F)C(F)(F)C(F)(F)C(F)(F)C(F)(F)C(F)(F)C(F)(F)C(F)(F)C(F)(F)C(F)(F)C(F)(F)C(F)(F)C(F)(F)C(F)(F)C(F)(F)C(F)(F)C(F)(F)C(F)(F)C(F)(F)C(F)(F)C(F)(F)C(F)(F)C(F)(F)C(F)(F)C(F)(F)C(F)(F)C(F)(F)C(F)(F)C(F)(F)C(F)(F)C(F)(F)C(F)(F)C(F)(F)C(F)(F)C(F)(F)C(F)(F)C(F)(F)C(F)(F)C(F)(F)C(F)(F)C(F)(F)C(F)(F)C(F)(F)C(F)(F)C(F)(F)C(F)(F)C(F)(F)C(F)(F)C(F)(F)C(F)(F)C(F)(F)C(F)(F)C(F)(F)C(F)(F)C(F)(F)C(F)(F)C(F)(F)C(F)(F)C(F)(F)C(F)(F)C(F)(F)C(F)(F)C(F)(F)C(F)(F)C(F)(F)C(F)(F)C(F)(F)C(F)(F)C(F)(F)C(F)(F)C(F)(F)C(F)(F)C(F)(F)C(F)(F)C(F)(F)C(F)(F)C(F)(F)C(F)(F)C(F)(F)C(F)(F)C(F)(F)C(F)(F)C(F)(F)C(F)(F)C(F)(F)C(F)(F)C(F)(F)C(F)(F)C(F)(F)C(F)(F)C(F)(F)C(F)(F)C(F)(F)C(F)(F)C(F)(F)C(F)(F)C(F)(F)C(F)(F)C(F)(F)C(F)(F)C(F)(F)C(F)(F)C(F)(F)C(F)(F)C(F)(F)C(F)(F)C(F)(F)C(F)(F)C(F)(F)C(F)(F)C(F)(F)C(F)(F)C(F)(F)C(F)(F)C(F)(F)C(F)(F)C(F)(F)C(F)(F)C(F)(F)C(F)(F)C(F)(F)C(F)(F)C(F)(F)C(F)(F)C(F)(F)C(F)(F)C(F)(F)C(F)(F)C(F)(F)C(F)(F)C(F)(F)C(F)(F)C(F)(F)C(F)(F)C(F)(F)C(F)(F)C(F)(F)C(F)(F)C(F)(F)C(F)(F)C(F)(F)C(F)(F)C(F)(F)C(F)(F)C(F)(F)C(F)(F)C(F)(F)C(F)(F)C(F)(F)C(F)(F)C(F)(F)C(F)(F)C(F)(F)C(F)(F)C(F)(F)C(F)(F)C(F)(F)C(F)(F)C(F)(F)C(F)(F)C(F)(F)C(F)(F)C(F)(F)C(F)(F)C(F)(F)C(F)(F)C(F)(F)C(F)(F)C(F)(F)C(F)(F)C(F)(F)C(F)(F)C(F)(F)C(F)(F)C(F)(F)C(F)(F)C(F)(F)C(F)(F)C(F)(F)C(F)(F)C(F)(F)C(F)(F)C(F)(F)C(F)(F)C(F)(F)C(F)(F)C(F)(F)C(F)(F)C(F)(F)C(F)(F)C(F)(F)C(F)(F)C(F)(F)C(F)(F)C(F)(F)C(F)(F)C(F)(F)C(F)(F)C(F)(F)C(F)(F)C(F)(F)C(F)(F)C(F)(F)C(F)(F)C(F)(F)C(F)(F)C(F)(F)C(F)(F)C(F)(F)C(F)(F)C(F)(F)C(F)(F)C(F)(F)C(F)(F)C(F)(F)C(F)(F)C(F)(F)C(F)(F)C(F)(F)C(F)(F)C(F)(F)C(F)(F)C(F)(F)C(F)(F)C(F)(F)C(F)(F)C(F)(F)C(F)(F)C(F)(F)C(F)(F)C(F)(F)C(F)(F)C(F)(F)C(F)(F)C(F)(F)C(F)(F)C(F)(F)C(F)(F)C(F)(F)C(F)(F)C(F)(F)C(F)(F)C(F)(F)C(F)(F)C(F)(F)C(F)(F)C(F)(F)C(F)(F)C(F)(F)C(F)(F)C(F)(F)C(F)(F)C(F)(F)C(F)(F)C(F)(F)C(F)(F)C(F)(F)C(F)(F)C(F)(F)C(F)(F)C(F)(F)C(F)(F)C(F)(F)C(F)(F)C(F)(F)C(F)(F)C(F)(F)C(F)(F)C(F)(F)C(F)(F)C(F)(F)C(F)(F)C(F)(F)C(F)(F)C(F)(F)C(F)(F)C(F)(F)C(F)(F)C(F)(F)C(F)(F)C(F)(F)C(F)(F)C(F)(F)C(F)(F)C(F)(F)C(F)(F)C(F)(F)C(F)(F)C(F)(F)C(F)(F)C(F)(F)C(F)(F)C(F)(F)C(F)(F)C(F)(F)C(F)(F)C(F)(F)C(F)(F)C(F)(F)C(F)(F)C(F)(F)C(F)(F)C(F)(F)C(F)(F)C(F)(F)C(F)(F)C(F)(F)C(F)(F)C(F)(F)C(F)(F)C(F)(F)C(F)(F)C(F)(F)C(F)(F)C(F)(F)C(F)(F)C(F)(F)C(F)(F)C(F)(F)C(F)(F)C(F)(F)C(F)(F)C(F)(F)C(F)(F)C(F)(F)C(F)(F)C(F)(F)C(F)(F)C(F)(F)C(F)(F)C(F)(F)C(F)(F)C(F)(F)C(F)(F)C(F)(F)C(F)(F)C(F)(F)C(F)(F)C(F)(F)C(F)(F)C(F)(F)C(F)(F)C(F)(F)C(F)(F)C(F)(F)C(F)(F)C(F)(F)C(F)(F)C(F)(F)C(F)(F)C(F)(F)C(F)(F)C(F)(F)C(F)(F)C(F)(F)C(F)(F)C(F)(F)C(F)(F)C(F)(F)C(F)(F)C(F)(F)C(F)(F)C(F)(F)C(F)(F)C(F)(F)C(F)(F)C(F)(F)C(F)(F)C(F)(F)C(F)(F)C(F)(F)C(F)(F)C(F)(F)C(F)(F)C(F)(F)C(F)(F)C(F)(F)C(F)(F)C(F)(F)C(F)(F)C(F)(F)C(F)(F)C(F)(F)C(F)(F)C(F)(F)C(F)(F)C(F)(F)C(F)(F)C(F)(F)C(F)(F)C(F)(F)C(F)(F)C(F)(F)C(F)(F)C(F)(F)C(F)(F)C(F)(F)C(F)(F)C(F)(F)C(F)(F)C(F)(F)C(F)(F)C(F)(F)C(F)(F)C(F)(F)C(F)(F)C(F)(F)C(F)(F)C(F)(F)C(F)(F)C(F)(F)C(F)(F)C(F)(F)C(F)(F)C(F)(F)C(F)(F)C(F)(F)C(F)(F)C(F)(F)C(F)(F)C(F)(F)C(F)(F)C(F)(F)C(F)(F)C(F)(F)C(F)(F)C(F)(F)C(F)(F)C(F)(F)C(F)(F)C(F)(F)C(F)(F)C(F)(F)C(F)(F)C(F)(F)C(F)(F)C(F)(F)C(F)(F)C(F)(F)C(F)(F)C(F)(F)C(F)(F)C(F)(F)C(F)(F)C(F)(F)C(F)(F)C(F)(F)C(F)(F)C(F)(F)C(F)(F)C(F)(F)C(F)(F)C(F)(F)C(F)(F)C(F)(F)C(F)(F)C(F)(F)C(F)(F)C(F)(F)C(F)(F)C(F)(F)C(F)(F)C(F)(F)C(F)(F)C(F)(F)C(F)(F)C(F)(F)C(F)(F)C(F)(F)C(F)(F)C(F)(F)C(F)(F)C(F)(F)C(F)(F)C(F)(F)C(F)(F)C(F)(F)C(F)(F)C(F)(F)C(F)(F)C(F)(F)C(F)(F)C(F)(F)C(F)(F)C(F)(F)C(F)(F)C(F)(F)C(F)(F)C(F)(F)C(F)(F)C(F)(F)C(F)(F)C(F)(F)C(F)(F)C(F)(F)C(F)(F)C(F)(F)C(F)(F)C(F)(F)C(F)(F)C(F)(F)C(F)(F)C(F)(F)C(F)(F)C(F)(F)C(F)(F)C(F)(F)C(F)(F)C(F)(F)C(F)(F)C(F)(F)C(F)(F)C(F)(F)C(F)(F)C(F)(F)C(F)(F)C(F)(F)C(F)(F)C(F)(F)C(F)(F)C(F)(F)C(F)(F)C(F)(F)C(F)(F)C(F)(F)C(F)(F)C(F)(F)C(F)(F)C(F)(F)C(F)(F)C(F)(F)C(F)(F)C(F)(F)C(F)(F)C(F)(F)C(F)(F)C(F)(F)C(F)(F)C(F)(F)C(F)(F)C(F)(F)C(F)(F)C(F)(F)C(F)(F)C(F)(F)C(F)(F)C(F)(F)C(F)(F)C(F)(F)C(F)(F)C(F)(F)C(F)(F)C(F)(F)C(F)(F)C(F)(F)C(F)(F)C(F)(F)C(F)(F)C(F)(F)C(F)(F)C(F)(F)C(F)(F)C(F)(F)C(F)(F)C(F)(F)C(F)(F)C(F)(F)C(F)(F)C(F)(F)C(F)(F)C(F)(F)C(F)(F)C(F)(F)C(F)(F)C(F)(F)C(F)(F)C(F)(F)C(F)(F)C(F)(F)C(F)(F)C(F)(F)C(F)(F)C(F)(F)C(F)(F)C(F)(F)C(F)(F)C(F)(F)C(F)(F)C(F)(F)C(F)(F)C(F)(F)C(F)(F)C(F)(F)C(F)(F)C(F)(F)C(F)(F)C(F)(F)C(F)(F)C |        |       |      |   |     |



|         |                                                                                                                                                                                                 |             |                                                                                                                                                                                                                                                                                                                                                                                                                                                                                                                                                                                                                                                                                                                                                                                                                                                                                                                                                                                                                                                                                                                                                                                                                                                                                                                                                                                                                                                                                                                                                                                                                                                                                                                                                                                                                                                                                                                                                                                                                                                                                                                                                                                                                                                                                                                                                                                                                                                                                                                                                                                                                                                                                                                                                                                                                                                                                                                                                                                                                                                                                                                                                                                                                                                                                                                                                                                                                                                                                                                                                                                                                                                                                                                                                                                                                                                                                                                                                                                                                                                                                                                                                                                                                                                                                                                                                                                                                                                                                                                                                                                                                                                                                                                                                                                                                                                                                                                                                                                                                                                                                                                                                                                                                                                                                                                                                                                                                                |        |       |      |   |     |
|---------|-------------------------------------------------------------------------------------------------------------------------------------------------------------------------------------------------|-------------|--------------------------------------------------------------------------------------------------------------------------------------------------------------------------------------------------------------------------------------------------------------------------------------------------------------------------------------------------------------------------------------------------------------------------------------------------------------------------------------------------------------------------------------------------------------------------------------------------------------------------------------------------------------------------------------------------------------------------------------------------------------------------------------------------------------------------------------------------------------------------------------------------------------------------------------------------------------------------------------------------------------------------------------------------------------------------------------------------------------------------------------------------------------------------------------------------------------------------------------------------------------------------------------------------------------------------------------------------------------------------------------------------------------------------------------------------------------------------------------------------------------------------------------------------------------------------------------------------------------------------------------------------------------------------------------------------------------------------------------------------------------------------------------------------------------------------------------------------------------------------------------------------------------------------------------------------------------------------------------------------------------------------------------------------------------------------------------------------------------------------------------------------------------------------------------------------------------------------------------------------------------------------------------------------------------------------------------------------------------------------------------------------------------------------------------------------------------------------------------------------------------------------------------------------------------------------------------------------------------------------------------------------------------------------------------------------------------------------------------------------------------------------------------------------------------------------------------------------------------------------------------------------------------------------------------------------------------------------------------------------------------------------------------------------------------------------------------------------------------------------------------------------------------------------------------------------------------------------------------------------------------------------------------------------------------------------------------------------------------------------------------------------------------------------------------------------------------------------------------------------------------------------------------------------------------------------------------------------------------------------------------------------------------------------------------------------------------------------------------------------------------------------------------------------------------------------------------------------------------------------------------------------------------------------------------------------------------------------------------------------------------------------------------------------------------------------------------------------------------------------------------------------------------------------------------------------------------------------------------------------------------------------------------------------------------------------------------------------------------------------------------------------------------------------------------------------------------------------------------------------------------------------------------------------------------------------------------------------------------------------------------------------------------------------------------------------------------------------------------------------------------------------------------------------------------------------------------------------------------------------------------------------------------------------------------------------------------------------------------------------------------------------------------------------------------------------------------------------------------------------------------------------------------------------------------------------------------------------------------------------------------------------------------------------------------------------------------------------------------------------------------------------------------------------------|--------|-------|------|---|-----|
| QL03936 | Perfluoro(3,3'-(piperazine-1,4-diyl)diopropanoic acid)                                                                                                                                          | 948014-40-2 | OC(=O)C(F)(F)C(F)(F)N1C(F)(F)C(F)(F)N(C(F)(F)C(F)(F)O)=O)C(F)(F)C1(F)F                                                                                                                                                                                                                                                                                                                                                                                                                                                                                                                                                                                                                                                                                                                                                                                                                                                                                                                                                                                                                                                                                                                                                                                                                                                                                                                                                                                                                                                                                                                                                                                                                                                                                                                                                                                                                                                                                                                                                                                                                                                                                                                                                                                                                                                                                                                                                                                                                                                                                                                                                                                                                                                                                                                                                                                                                                                                                                                                                                                                                                                                                                                                                                                                                                                                                                                                                                                                                                                                                                                                                                                                                                                                                                                                                                                                                                                                                                                                                                                                                                                                                                                                                                                                                                                                                                                                                                                                                                                                                                                                                                                                                                                                                                                                                                                                                                                                                                                                                                                                                                                                                                                                                                                                                                                                                                                                                         | -8.56  | 47.06 | 2.43 | P | IN  |
| QL03937 | Perfluoro-3-[(1-(etheniloxy)propan-2-yloxy]propanoic acid                                                                                                                                       | 69087-46-3  | OC(=O)C(F)(F)C(F)(F)OC(F)(C(F)(F)C(F)(F)OC(F)=C)F                                                                                                                                                                                                                                                                                                                                                                                                                                                                                                                                                                                                                                                                                                                                                                                                                                                                                                                                                                                                                                                                                                                                                                                                                                                                                                                                                                                                                                                                                                                                                                                                                                                                                                                                                                                                                                                                                                                                                                                                                                                                                                                                                                                                                                                                                                                                                                                                                                                                                                                                                                                                                                                                                                                                                                                                                                                                                                                                                                                                                                                                                                                                                                                                                                                                                                                                                                                                                                                                                                                                                                                                                                                                                                                                                                                                                                                                                                                                                                                                                                                                                                                                                                                                                                                                                                                                                                                                                                                                                                                                                                                                                                                                                                                                                                                                                                                                                                                                                                                                                                                                                                                                                                                                                                                                                                                                                                              | -8.77  | 50.00 | 2.43 | P | IN  |
| QL03938 | Perfluoro-3-ethoxypropanoic acid                                                                                                                                                                | 377-76-4    | OC(=O)C(F)(F)C(F)(F)OC(F)(F)C(F)(F)F                                                                                                                                                                                                                                                                                                                                                                                                                                                                                                                                                                                                                                                                                                                                                                                                                                                                                                                                                                                                                                                                                                                                                                                                                                                                                                                                                                                                                                                                                                                                                                                                                                                                                                                                                                                                                                                                                                                                                                                                                                                                                                                                                                                                                                                                                                                                                                                                                                                                                                                                                                                                                                                                                                                                                                                                                                                                                                                                                                                                                                                                                                                                                                                                                                                                                                                                                                                                                                                                                                                                                                                                                                                                                                                                                                                                                                                                                                                                                                                                                                                                                                                                                                                                                                                                                                                                                                                                                                                                                                                                                                                                                                                                                                                                                                                                                                                                                                                                                                                                                                                                                                                                                                                                                                                                                                                                                                                           | -7.48  | 50.00 | 1.90 | P | IN  |
| QL03939 | Perfluoro-3-methoxypropanoic acid                                                                                                                                                               | 377-73-1    | OC(=O)C(F)(F)C(F)(F)OC(F)(F)F                                                                                                                                                                                                                                                                                                                                                                                                                                                                                                                                                                                                                                                                                                                                                                                                                                                                                                                                                                                                                                                                                                                                                                                                                                                                                                                                                                                                                                                                                                                                                                                                                                                                                                                                                                                                                                                                                                                                                                                                                                                                                                                                                                                                                                                                                                                                                                                                                                                                                                                                                                                                                                                                                                                                                                                                                                                                                                                                                                                                                                                                                                                                                                                                                                                                                                                                                                                                                                                                                                                                                                                                                                                                                                                                                                                                                                                                                                                                                                                                                                                                                                                                                                                                                                                                                                                                                                                                                                                                                                                                                                                                                                                                                                                                                                                                                                                                                                                                                                                                                                                                                                                                                                                                                                                                                                                                                                                                  | -7.09  | 46.67 | 1.84 | P | IN  |
| QL03940 | Flupropanate                                                                                                                                                                                    | 756-09-2    | OC(=O)C(F)(F)C(F)F                                                                                                                                                                                                                                                                                                                                                                                                                                                                                                                                                                                                                                                                                                                                                                                                                                                                                                                                                                                                                                                                                                                                                                                                                                                                                                                                                                                                                                                                                                                                                                                                                                                                                                                                                                                                                                                                                                                                                                                                                                                                                                                                                                                                                                                                                                                                                                                                                                                                                                                                                                                                                                                                                                                                                                                                                                                                                                                                                                                                                                                                                                                                                                                                                                                                                                                                                                                                                                                                                                                                                                                                                                                                                                                                                                                                                                                                                                                                                                                                                                                                                                                                                                                                                                                                                                                                                                                                                                                                                                                                                                                                                                                                                                                                                                                                                                                                                                                                                                                                                                                                                                                                                                                                                                                                                                                                                                                                             | -5.32  | 36.36 | 1.39 | P | IN  |
| QL03941 | 2,2-Difluoro-3-(nonafluorobutoxy)propanoic acid<br>[(1-Chloro-1,1,2,3,3,3-hexafluoropropan-2-yloxy](difluoro)acetic acid                                                                        | 824393-39-7 | OC(=O)C(F)(F)COC(F)(F)C(F)(F)C(F)(F)C(F)(F)F                                                                                                                                                                                                                                                                                                                                                                                                                                                                                                                                                                                                                                                                                                                                                                                                                                                                                                                                                                                                                                                                                                                                                                                                                                                                                                                                                                                                                                                                                                                                                                                                                                                                                                                                                                                                                                                                                                                                                                                                                                                                                                                                                                                                                                                                                                                                                                                                                                                                                                                                                                                                                                                                                                                                                                                                                                                                                                                                                                                                                                                                                                                                                                                                                                                                                                                                                                                                                                                                                                                                                                                                                                                                                                                                                                                                                                                                                                                                                                                                                                                                                                                                                                                                                                                                                                                                                                                                                                                                                                                                                                                                                                                                                                                                                                                                                                                                                                                                                                                                                                                                                                                                                                                                                                                                                                                                                                                   | -8.03  | 45.83 | 2.24 | P | IN  |
| QL03942 | Perfluoro-3,6-dioxadecanoic acid                                                                                                                                                                | 903523-21-7 | OC(=O)C(F)(F)OC(F)(F)C(F)(F)C(F)(F)Cl                                                                                                                                                                                                                                                                                                                                                                                                                                                                                                                                                                                                                                                                                                                                                                                                                                                                                                                                                                                                                                                                                                                                                                                                                                                                                                                                                                                                                                                                                                                                                                                                                                                                                                                                                                                                                                                                                                                                                                                                                                                                                                                                                                                                                                                                                                                                                                                                                                                                                                                                                                                                                                                                                                                                                                                                                                                                                                                                                                                                                                                                                                                                                                                                                                                                                                                                                                                                                                                                                                                                                                                                                                                                                                                                                                                                                                                                                                                                                                                                                                                                                                                                                                                                                                                                                                                                                                                                                                                                                                                                                                                                                                                                                                                                                                                                                                                                                                                                                                                                                                                                                                                                                                                                                                                                                                                                                                                          | -6.86  | 50.00 | 1.65 | P | IN  |
| QL03943 | Perfluoro-3,6-dioxaoctanoic acid                                                                                                                                                                | 137780-69-9 | O=C(O)C(F)(F)OC(F)(F)C(F)(F)OC(F)(F)C(F)(F)C(F)(F)F                                                                                                                                                                                                                                                                                                                                                                                                                                                                                                                                                                                                                                                                                                                                                                                                                                                                                                                                                                                                                                                                                                                                                                                                                                                                                                                                                                                                                                                                                                                                                                                                                                                                                                                                                                                                                                                                                                                                                                                                                                                                                                                                                                                                                                                                                                                                                                                                                                                                                                                                                                                                                                                                                                                                                                                                                                                                                                                                                                                                                                                                                                                                                                                                                                                                                                                                                                                                                                                                                                                                                                                                                                                                                                                                                                                                                                                                                                                                                                                                                                                                                                                                                                                                                                                                                                                                                                                                                                                                                                                                                                                                                                                                                                                                                                                                                                                                                                                                                                                                                                                                                                                                                                                                                                                                                                                                                                            | -9.19  | 53.57 | 2.51 | P | IN  |
| QL03944 | Perfluoro-3,6-dioxaetanoic acid                                                                                                                                                                 | 80153-82-8  | OC(=O)C(F)(F)OC(F)(F)C(F)(F)OC(F)(F)C(F)(F)F                                                                                                                                                                                                                                                                                                                                                                                                                                                                                                                                                                                                                                                                                                                                                                                                                                                                                                                                                                                                                                                                                                                                                                                                                                                                                                                                                                                                                                                                                                                                                                                                                                                                                                                                                                                                                                                                                                                                                                                                                                                                                                                                                                                                                                                                                                                                                                                                                                                                                                                                                                                                                                                                                                                                                                                                                                                                                                                                                                                                                                                                                                                                                                                                                                                                                                                                                                                                                                                                                                                                                                                                                                                                                                                                                                                                                                                                                                                                                                                                                                                                                                                                                                                                                                                                                                                                                                                                                                                                                                                                                                                                                                                                                                                                                                                                                                                                                                                                                                                                                                                                                                                                                                                                                                                                                                                                                                                   | -8.13  | 50.00 | 2.17 | P | IN  |
| QL03945 | Perfluoro-3,6,9-trioxatridecanoic acid                                                                                                                                                          | 330562-41-9 | OC(=O)C(F)(F)OC(F)(F)C(F)(F)OC(F)(F)C(F)(F)OC(F)(F)C(F)(F)C(F)(F)F                                                                                                                                                                                                                                                                                                                                                                                                                                                                                                                                                                                                                                                                                                                                                                                                                                                                                                                                                                                                                                                                                                                                                                                                                                                                                                                                                                                                                                                                                                                                                                                                                                                                                                                                                                                                                                                                                                                                                                                                                                                                                                                                                                                                                                                                                                                                                                                                                                                                                                                                                                                                                                                                                                                                                                                                                                                                                                                                                                                                                                                                                                                                                                                                                                                                                                                                                                                                                                                                                                                                                                                                                                                                                                                                                                                                                                                                                                                                                                                                                                                                                                                                                                                                                                                                                                                                                                                                                                                                                                                                                                                                                                                                                                                                                                                                                                                                                                                                                                                                                                                                                                                                                                                                                                                                                                                                                             | -10.17 | 54.29 | 2.89 | P | OUT |
| QL03946 | Perfluoro-3,6,9-trioxaundecane-1,11-dioic acid                                                                                                                                                  | 55621-18-6  | OC(=O)C(F)(F)OC(F)(F)C(F)(F)OC(F)(F)C(F)(F)OC(F)(F)C(O)=O                                                                                                                                                                                                                                                                                                                                                                                                                                                                                                                                                                                                                                                                                                                                                                                                                                                                                                                                                                                                                                                                                                                                                                                                                                                                                                                                                                                                                                                                                                                                                                                                                                                                                                                                                                                                                                                                                                                                                                                                                                                                                                                                                                                                                                                                                                                                                                                                                                                                                                                                                                                                                                                                                                                                                                                                                                                                                                                                                                                                                                                                                                                                                                                                                                                                                                                                                                                                                                                                                                                                                                                                                                                                                                                                                                                                                                                                                                                                                                                                                                                                                                                                                                                                                                                                                                                                                                                                                                                                                                                                                                                                                                                                                                                                                                                                                                                                                                                                                                                                                                                                                                                                                                                                                                                                                                                                                                      | -8.56  | 41.38 | 2.59 | P | IN  |
| QL03947 | Perfluoro-3,6,9-trioxadecanoic acid                                                                                                                                                             | 151772-59-7 | OC(=O)C(F)(F)OC(F)(F)C(F)(F)OC(F)(F)C(F)(F)OC(F)(F)C(F)(F)F                                                                                                                                                                                                                                                                                                                                                                                                                                                                                                                                                                                                                                                                                                                                                                                                                                                                                                                                                                                                                                                                                                                                                                                                                                                                                                                                                                                                                                                                                                                                                                                                                                                                                                                                                                                                                                                                                                                                                                                                                                                                                                                                                                                                                                                                                                                                                                                                                                                                                                                                                                                                                                                                                                                                                                                                                                                                                                                                                                                                                                                                                                                                                                                                                                                                                                                                                                                                                                                                                                                                                                                                                                                                                                                                                                                                                                                                                                                                                                                                                                                                                                                                                                                                                                                                                                                                                                                                                                                                                                                                                                                                                                                                                                                                                                                                                                                                                                                                                                                                                                                                                                                                                                                                                                                                                                                                                                    | -8.98  | 50.00 | 2.52 | P | IN  |
| QL03948 | Perfluoro-3,6-dioxaotane-1,8-dioic acid                                                                                                                                                         | 55621-21-1  | OC(=O)C(F)(F)OC(F)(F)C(F)(F)OC(F)(F)C(F)(F)O=O                                                                                                                                                                                                                                                                                                                                                                                                                                                                                                                                                                                                                                                                                                                                                                                                                                                                                                                                                                                                                                                                                                                                                                                                                                                                                                                                                                                                                                                                                                                                                                                                                                                                                                                                                                                                                                                                                                                                                                                                                                                                                                                                                                                                                                                                                                                                                                                                                                                                                                                                                                                                                                                                                                                                                                                                                                                                                                                                                                                                                                                                                                                                                                                                                                                                                                                                                                                                                                                                                                                                                                                                                                                                                                                                                                                                                                                                                                                                                                                                                                                                                                                                                                                                                                                                                                                                                                                                                                                                                                                                                                                                                                                                                                                                                                                                                                                                                                                                                                                                                                                                                                                                                                                                                                                                                                                                                                                 | -7.21  | 36.36 | 2.17 | P | IN  |
| QL03949 | Perfluoro-3,6-dioxaheptanoic acid                                                                                                                                                               | 151772-58-6 | OC(=O)C(F)(F)OC(F)(F)C(F)(F)OC(F)(F)F                                                                                                                                                                                                                                                                                                                                                                                                                                                                                                                                                                                                                                                                                                                                                                                                                                                                                                                                                                                                                                                                                                                                                                                                                                                                                                                                                                                                                                                                                                                                                                                                                                                                                                                                                                                                                                                                                                                                                                                                                                                                                                                                                                                                                                                                                                                                                                                                                                                                                                                                                                                                                                                                                                                                                                                                                                                                                                                                                                                                                                                                                                                                                                                                                                                                                                                                                                                                                                                                                                                                                                                                                                                                                                                                                                                                                                                                                                                                                                                                                                                                                                                                                                                                                                                                                                                                                                                                                                                                                                                                                                                                                                                                                                                                                                                                                                                                                                                                                                                                                                                                                                                                                                                                                                                                                                                                                                                          | -8.00  | 47.37 | 2.19 | P | IN  |
| QL03950 | 3-Azido-2,3,3-trifluoro-2-(heptafluoropropoxy)propanoic acid                                                                                                                                    | 95906-13-1  | OC(=O)C(F)(OC(F)(F)C(F)(F)C(F)(F)C(F)(F)N=[N+]=[N-])N=[N-]                                                                                                                                                                                                                                                                                                                                                                                                                                                                                                                                                                                                                                                                                                                                                                                                                                                                                                                                                                                                                                                                                                                                                                                                                                                                                                                                                                                                                                                                                                                                                                                                                                                                                                                                                                                                                                                                                                                                                                                                                                                                                                                                                                                                                                                                                                                                                                                                                                                                                                                                                                                                                                                                                                                                                                                                                                                                                                                                                                                                                                                                                                                                                                                                                                                                                                                                                                                                                                                                                                                                                                                                                                                                                                                                                                                                                                                                                                                                                                                                                                                                                                                                                                                                                                                                                                                                                                                                                                                                                                                                                                                                                                                                                                                                                                                                                                                                                                                                                                                                                                                                                                                                                                                                                                                                                                                                                                     | -7.73  | 43.48 | 2.19 | P | IN  |
| QL03951 | Perfluoro-2,5-dimethyl-3,6-dioxanonanoic acid                                                                                                                                                   | 13252-14-7  | OC(=O)C(F)(OC(F)(F)C(F)(F)OC(F)(F)C(F)(F)C(F)(F)C(F)(F)C(F)(F)F                                                                                                                                                                                                                                                                                                                                                                                                                                                                                                                                                                                                                                                                                                                                                                                                                                                                                                                                                                                                                                                                                                                                                                                                                                                                                                                                                                                                                                                                                                                                                                                                                                                                                                                                                                                                                                                                                                                                                                                                                                                                                                                                                                                                                                                                                                                                                                                                                                                                                                                                                                                                                                                                                                                                                                                                                                                                                                                                                                                                                                                                                                                                                                                                                                                                                                                                                                                                                                                                                                                                                                                                                                                                                                                                                                                                                                                                                                                                                                                                                                                                                                                                                                                                                                                                                                                                                                                                                                                                                                                                                                                                                                                                                                                                                                                                                                                                                                                                                                                                                                                                                                                                                                                                                                                                                                                                                                | -9.02  | 54.84 | 2.40 | P | IN  |
| QL03952 | Perfluoro-[2,5,8-trimethyl-3,6,9-trioxadodecanoic]acid<br>2,4,4,5,7,7,8,10,10,11,13,13,14,14,15,15,15-Heptadecafluoro-2,5,8,11-tetrakis(trifluoromethyl)-3,6,9,12-tetraoxapentadecan-1-oic acid | 65294-16-8  | OC(=O)C(F)(OC(F)(F)C(F)(F)OC(F)(F)C(F)(F)OC(F)(F)C(F)(F)C(F)(F)C(F)(F)C(F)(F)C(F)(F)F                                                                                                                                                                                                                                                                                                                                                                                                                                                                                                                                                                                                                                                                                                                                                                                                                                                                                                                                                                                                                                                                                                                                                                                                                                                                                                                                                                                                                                                                                                                                                                                                                                                                                                                                                                                                                                                                                                                                                                                                                                                                                                                                                                                                                                                                                                                                                                                                                                                                                                                                                                                                                                                                                                                                                                                                                                                                                                                                                                                                                                                                                                                                                                                                                                                                                                                                                                                                                                                                                                                                                                                                                                                                                                                                                                                                                                                                                                                                                                                                                                                                                                                                                                                                                                                                                                                                                                                                                                                                                                                                                                                                                                                                                                                                                                                                                                                                                                                                                                                                                                                                                                                                                                                                                                                                                                                                          | -9.74  | 56.10 | 2.67 | P | IN  |
| QL03953 | Perfluoro(2,5,8,11,14-pentamethyl-3,6,9,12,15-pentaoxaooctadecanoic) acid                                                                                                                       | 65150-95-0  | OC(=O)C(F)(OC(F)(F)C(F)(F)OC(F)(F)C(F)(F)OC(F)(F)C(F)(F)OC(F)(F)C(F)(F)C(F)(F)C(F)(F)C(F)(F)C(F)(F)F                                                                                                                                                                                                                                                                                                                                                                                                                                                                                                                                                                                                                                                                                                                                                                                                                                                                                                                                                                                                                                                                                                                                                                                                                                                                                                                                                                                                                                                                                                                                                                                                                                                                                                                                                                                                                                                                                                                                                                                                                                                                                                                                                                                                                                                                                                                                                                                                                                                                                                                                                                                                                                                                                                                                                                                                                                                                                                                                                                                                                                                                                                                                                                                                                                                                                                                                                                                                                                                                                                                                                                                                                                                                                                                                                                                                                                                                                                                                                                                                                                                                                                                                                                                                                                                                                                                                                                                                                                                                                                                                                                                                                                                                                                                                                                                                                                                                                                                                                                                                                                                                                                                                                                                                                                                                                                                           | -10.62 |       | 3.01 | P | OUT |
| QL03954 | 3-(Perfluoroisopropyl)-(2E)-difluoropropenoic acid                                                                                                                                              | 52481-85-3  | OC(=O)C(F)=C(/F)C(F)(C(F)(F)C(F)(F)F                                                                                                                                                                                                                                                                                                                                                                                                                                                                                                                                                                                                                                                                                                                                                                                                                                                                                                                                                                                                                                                                                                                                                                                                                                                                                                                                                                                                                                                                                                                                                                                                                                                                                                                                                                                                                                                                                                                                                                                                                                                                                                                                                                                                                                                                                                                                                                                                                                                                                                                                                                                                                                                                                                                                                                                                                                                                                                                                                                                                                                                                                                                                                                                                                                                                                                                                                                                                                                                                                                                                                                                                                                                                                                                                                                                                                                                                                                                                                                                                                                                                                                                                                                                                                                                                                                                                                                                                                                                                                                                                                                                                                                                                                                                                                                                                                                                                                                                                                                                                                                                                                                                                                                                                                                                                                                                                                                                           | -11.10 | 57.38 | 3.19 | P | OUT |
| QL03955 |                                                                                                                                                                                                 | 103229-89-6 | OC(=O)C(F)=C(/F)C(F)(C(F)(F)C(F)(F)F                                                                                                                                                                                                                                                                                                                                                                                                                                                                                                                                                                                                                                                                                                                                                                                                                                                                                                                                                                                                                                                                                                                                                                                                                                                                                                                                                                                                                                                                                                                                                                                                                                                                                                                                                                                                                                                                                                                                                                                                                                                                                                                                                                                                                                                                                                                                                                                                                                                                                                                                                                                                                                                                                                                                                                                                                                                                                                                                                                                                                                                                                                                                                                                                                                                                                                                                                                                                                                                                                                                                                                                                                                                                                                                                                                                                                                                                                                                                                                                                                                                                                                                                                                                                                                                                                                                                                                                                                                                                                                                                                                                                                                                                                                                                                                                                                                                                                                                                                                                                                                                                                                                                                                                                                                                                                                                                                                                           | -7.02  | 50.00 | 1.71 | P | IN  |
| QL03956 | 2,3,4,4,4-Pentafluoro-3-(trifluoromethyl)butanoic acid                                                                                                                                          | 917951-62-3 | OC(=O)C(F)C(F)(C(F)(F)C(F)(F)F                                                                                                                                                                                                                                                                                                                                                                                                                                                                                                                                                                                                                                                                                                                                                                                                                                                                                                                                                                                                                                                                                                                                                                                                                                                                                                                                                                                                                                                                                                                                                                                                                                                                                                                                                                                                                                                                                                                                                                                                                                                                                                                                                                                                                                                                                                                                                                                                                                                                                                                                                                                                                                                                                                                                                                                                                                                                                                                                                                                                                                                                                                                                                                                                                                                                                                                                                                                                                                                                                                                                                                                                                                                                                                                                                                                                                                                                                                                                                                                                                                                                                                                                                                                                                                                                                                                                                                                                                                                                                                                                                                                                                                                                                                                                                                                                                                                                                                                                                                                                                                                                                                                                                                                                                                                                                                                                                                                                 | -6.06  | 47.06 | 1.40 | P | IN  |
| QL03957 | (2Z)-4,4,5,5,6,6,6-Heptafluoro-3-phenylhex-2-enoic acid<br>(3,3,4,4,5,5,6,6,7,7,8,8,9,9,10,10,10-heptadecafluorodecyl) hydrogen maleate                                                         | 154375-43-6 | OC(=O)C=C(c1cccc1)C(F)(F)C(F)(F)C(F)(F)F                                                                                                                                                                                                                                                                                                                                                                                                                                                                                                                                                                                                                                                                                                                                                                                                                                                                                                                                                                                                                                                                                                                                                                                                                                                                                                                                                                                                                                                                                                                                                                                                                                                                                                                                                                                                                                                                                                                                                                                                                                                                                                                                                                                                                                                                                                                                                                                                                                                                                                                                                                                                                                                                                                                                                                                                                                                                                                                                                                                                                                                                                                                                                                                                                                                                                                                                                                                                                                                                                                                                                                                                                                                                                                                                                                                                                                                                                                                                                                                                                                                                                                                                                                                                                                                                                                                                                                                                                                                                                                                                                                                                                                                                                                                                                                                                                                                                                                                                                                                                                                                                                                                                                                                                                                                                                                                                                                                       | -6.30  |       | 2.11 | P | OUT |
| QL03959 |                                                                                                                                                                                                 | 54950-04-8  | OC(=O)C=C/C(Cl=O)OCC(F)(F)C(F)(F)C(F)(F)C(F)(F)C(F)(F)C(F)(F)C(F)(F)F                                                                                                                                                                                                                                                                                                                                                                                                                                                                                                                                                                                                                                                                                                                                                                                                                                                                                                                                                                                                                                                                                                                                                                                                                                                                                                                                                                                                                                                                                                                                                                                                                                                                                                                                                                                                                                                                                                                                                                                                                                                                                                                                                                                                                                                                                                                                                                                                                                                                                                                                                                                                                                                                                                                                                                                                                                                                                                                                                                                                                                                                                                                                                                                                                                                                                                                                                                                                                                                                                                                                                                                                                                                                                                                                                                                                                                                                                                                                                                                                                                                                                                                                                                                                                                                                                                                                                                                                                                                                                                                                                                                                                                                                                                                                                                                                                                                                                                                                                                                                                                                                                                                                                                                                                                                                                                                                                          | -9.73  | 40.48 | 3.09 | P | IN  |
| QL03960 | 4-[(Heptadecafluoroctyloxy)-4-oxobut-2-enoic acid                                                                                                                                               | 152682-85-4 | OC(=O)C=C(CC(=O)OC(F)(F)C(F)(F)C(F)(F)C(F)(F)C(F)(F)C(F)(F)C(F)(F)F                                                                                                                                                                                                                                                                                                                                                                                                                                                                                                                                                                                                                                                                                                                                                                                                                                                                                                                                                                                                                                                                                                                                                                                                                                                                                                                                                                                                                                                                                                                                                                                                                                                                                                                                                                                                                                                                                                                                                                                                                                                                                                                                                                                                                                                                                                                                                                                                                                                                                                                                                                                                                                                                                                                                                                                                                                                                                                                                                                                                                                                                                                                                                                                                                                                                                                                                                                                                                                                                                                                                                                                                                                                                                                                                                                                                                                                                                                                                                                                                                                                                                                                                                                                                                                                                                                                                                                                                                                                                                                                                                                                                                                                                                                                                                                                                                                                                                                                                                                                                                                                                                                                                                                                                                                                                                                                                                            | -9.72  | 47.22 | 2.90 | P | IN  |
| QL03961 | (Perfluoroctylethyl)hydrogen fumarate                                                                                                                                                           | 86130-60-1  | OC(=O)C=C(CC(=O)OCC(F)(F)C(F)(F)C(F)(F)C(F)(F)C(F)(F)C(F)(F)C(F)(F)F                                                                                                                                                                                                                                                                                                                                                                                                                                                                                                                                                                                                                                                                                                                                                                                                                                                                                                                                                                                                                                                                                                                                                                                                                                                                                                                                                                                                                                                                                                                                                                                                                                                                                                                                                                                                                                                                                                                                                                                                                                                                                                                                                                                                                                                                                                                                                                                                                                                                                                                                                                                                                                                                                                                                                                                                                                                                                                                                                                                                                                                                                                                                                                                                                                                                                                                                                                                                                                                                                                                                                                                                                                                                                                                                                                                                                                                                                                                                                                                                                                                                                                                                                                                                                                                                                                                                                                                                                                                                                                                                                                                                                                                                                                                                                                                                                                                                                                                                                                                                                                                                                                                                                                                                                                                                                                                                                           | -9.73  | 40.48 | 3.09 | P | IN  |
| QL03962 | 4,4,5,5,6,6,6-Heptafluorohehex-2-enoic acid                                                                                                                                                     | 356-03-6    | OC(=O)C=C(C(F)(F)C(F)(F)F                                                                                                                                                                                                                                                                                                                                                                                                                                                                                                                                                                                                                                                                                                                                                                                                                                                                                                                                                                                                                                                                                                                                                                                                                                                                                                                                                                                                                                                                                                                                                                                                                                                                                                                                                                                                                                                                                                                                                                                                                                                                                                                                                                                                                                                                                                                                                                                                                                                                                                                                                                                                                                                                                                                                                                                                                                                                                                                                                                                                                                                                                                                                                                                                                                                                                                                                                                                                                                                                                                                                                                                                                                                                                                                                                                                                                                                                                                                                                                                                                                                                                                                                                                                                                                                                                                                                                                                                                                                                                                                                                                                                                                                                                                                                                                                                                                                                                                                                                                                                                                                                                                                                                                                                                                                                                                                                                                                                      | -6.81  | 38.89 | 1.93 | P | IN  |
| QL03964 | 5-[(Heptadecafluorononyl(oxy)]benzenedicarboxylic acid                                                                                                                                          | 96210-37-6  | OC(=O)C1=CC(=CC(OC(F)=C(F)(F)C(F)(F)C(F)(F)C(F)(F)C(F)(F)C(F)(F)C(F)(F)F)=C1)C(O)=O                                                                                                                                                                                                                                                                                                                                                                                                                                                                                                                                                                                                                                                                                                                                                                                                                                                                                                                                                                                                                                                                                                                                                                                                                                                                                                                                                                                                                                                                                                                                                                                                                                                                                                                                                                                                                                                                                                                                                                                                                                                                                                                                                                                                                                                                                                                                                                                                                                                                                                                                                                                                                                                                                                                                                                                                                                                                                                                                                                                                                                                                                                                                                                                                                                                                                                                                                                                                                                                                                                                                                                                                                                                                                                                                                                                                                                                                                                                                                                                                                                                                                                                                                                                                                                                                                                                                                                                                                                                                                                                                                                                                                                                                                                                                                                                                                                                                                                                                                                                                                                                                                                                                                                                                                                                                                                                                            | -9.22  | 38.64 | 2.94 | P | IN  |
| QL03965 | 4-(Heptafluoroisopropyl)benzoic acid                                                                                                                                                            | 2396-21-6   | OC(=O)C1=CC=C(C=C1)C(F)(F)C(F)(F)F                                                                                                                                                                                                                                                                                                                                                                                                                                                                                                                                                                                                                                                                                                                                                                                                                                                                                                                                                                                                                                                                                                                                                                                                                                                                                                                                                                                                                                                                                                                                                                                                                                                                                                                                                                                                                                                                                                                                                                                                                                                                                                                                                                                                                                                                                                                                                                                                                                                                                                                                                                                                                                                                                                                                                                                                                                                                                                                                                                                                                                                                                                                                                                                                                                                                                                                                                                                                                                                                                                                                                                                                                                                                                                                                                                                                                                                                                                                                                                                                                                                                                                                                                                                                                                                                                                                                                                                                                                                                                                                                                                                                                                                                                                                                                                                                                                                                                                                                                                                                                                                                                                                                                                                                                                                                                                                                                                                             | -6.56  | 29.17 | 2.10 | P | IN  |
| QL03966 | 4-(Heptadecafluoroctyl)benzoic acid                                                                                                                                                             | 74701-33-0  | OC(=O)C1=CC=C(C=C1)C(F)(F)C(F)(F)C(F)(F)C(F)(F)C(F)(F)C(F)(F)F                                                                                                                                                                                                                                                                                                                                                                                                                                                                                                                                                                                                                                                                                                                                                                                                                                                                                                                                                                                                                                                                                                                                                                                                                                                                                                                                                                                                                                                                                                                                                                                                                                                                                                                                                                                                                                                                                                                                                                                                                                                                                                                                                                                                                                                                                                                                                                                                                                                                                                                                                                                                                                                                                                                                                                                                                                                                                                                                                                                                                                                                                                                                                                                                                                                                                                                                                                                                                                                                                                                                                                                                                                                                                                                                                                                                                                                                                                                                                                                                                                                                                                                                                                                                                                                                                                                                                                                                                                                                                                                                                                                                                                                                                                                                                                                                                                                                                                                                                                                                                                                                                                                                                                                                                                                                                                                                                                 | -9.47  | 43.59 | 2.90 | P | IN  |
| QL03967 | 4-(Nonafluorobutyl)benzoic acid                                                                                                                                                                 | 13835-88-6  | OC(=O)C1=CC=C(C=C1)C(F)(F)C(F)(F)C(F)(F)F                                                                                                                                                                                                                                                                                                                                                                                                                                                                                                                                                                                                                                                                                                                                                                                                                                                                                                                                                                                                                                                                                                                                                                                                                                                                                                                                                                                                                                                                                                                                                                                                                                                                                                                                                                                                                                                                                                                                                                                                                                                                                                                                                                                                                                                                                                                                                                                                                                                                                                                                                                                                                                                                                                                                                                                                                                                                                                                                                                                                                                                                                                                                                                                                                                                                                                                                                                                                                                                                                                                                                                                                                                                                                                                                                                                                                                                                                                                                                                                                                                                                                                                                                                                                                                                                                                                                                                                                                                                                                                                                                                                                                                                                                                                                                                                                                                                                                                                                                                                                                                                                                                                                                                                                                                                                                                                                                                                      | -7.71  | 33.33 | 2.46 | P | IN  |
| QL03968 | 4-(Heptafluoropropyl)benzoic acid                                                                                                                                                               | 88950-94-1  | OC(=O)C1=CC=C(C=C1)C(F)(F)C(F)(F)F                                                                                                                                                                                                                                                                                                                                                                                                                                                                                                                                                                                                                                                                                                                                                                                                                                                                                                                                                                                                                                                                                                                                                                                                                                                                                                                                                                                                                                                                                                                                                                                                                                                                                                                                                                                                                                                                                                                                                                                                                                                                                                                                                                                                                                                                                                                                                                                                                                                                                                                                                                                                                                                                                                                                                                                                                                                                                                                                                                                                                                                                                                                                                                                                                                                                                                                                                                                                                                                                                                                                                                                                                                                                                                                                                                                                                                                                                                                                                                                                                                                                                                                                                                                                                                                                                                                                                                                                                                                                                                                                                                                                                                                                                                                                                                                                                                                                                                                                                                                                                                                                                                                                                                                                                                                                                                                                                                                             | -7.03  | 29.17 | 2.29 | P | IN  |
| QL03969 | 4-[(1,1,2,3,3,4,4,5,5,6,6,7,7,8,8,9,9,9-Heptafluorononyl-1-en-1-yl)oxy]benzoic acid                                                                                                             | 58253-65-9  | OC(=O)C1=CC=C(OC(F)=C(F)(F)C(F)(F)C(F)(F)C(F)(F)C(F)(F)C(F)(F)C(F)(F)C(F)(F)C(F)(F)C(F)(F)C(F)(F)C(F)(F)C(F)(F)C(F)(F)C(F)(F)C(F)(F)C(F)(F)C(F)(F)C(F)(F)C(F)(F)C(F)(F)C(F)(F)C(F)(F)C(F)(F)C(F)(F)C(F)(F)C(F)(F)C(F)(F)C(F)(F)C(F)(F)C(F)(F)C(F)(F)C(F)(F)C(F)(F)C(F)(F)C(F)(F)C(F)(F)C(F)(F)C(F)(F)C(F)(F)C(F)(F)C(F)(F)C(F)(F)C(F)(F)C(F)(F)C(F)(F)C(F)(F)C(F)(F)C(F)(F)C(F)(F)C(F)(F)C(F)(F)C(F)(F)C(F)(F)C(F)(F)C(F)(F)C(F)(F)C(F)(F)C(F)(F)C(F)(F)C(F)(F)C(F)(F)C(F)(F)C(F)(F)C(F)(F)C(F)(F)C(F)(F)C(F)(F)C(F)(F)C(F)(F)C(F)(F)C(F)(F)C(F)(F)C(F)(F)C(F)(F)C(F)(F)C(F)(F)C(F)(F)C(F)(F)C(F)(F)C(F)(F)C(F)(F)C(F)(F)C(F)(F)C(F)(F)C(F)(F)C(F)(F)C(F)(F)C(F)(F)C(F)(F)C(F)(F)C(F)(F)C(F)(F)C(F)(F)C(F)(F)C(F)(F)C(F)(F)C(F)(F)C(F)(F)C(F)(F)C(F)(F)C(F)(F)C(F)(F)C(F)(F)C(F)(F)C(F)(F)C(F)(F)C(F)(F)C(F)(F)C(F)(F)C(F)(F)C(F)(F)C(F)(F)C(F)(F)C(F)(F)C(F)(F)C(F)(F)C(F)(F)C(F)(F)C(F)(F)C(F)(F)C(F)(F)C(F)(F)C(F)(F)C(F)(F)C(F)(F)C(F)(F)C(F)(F)C(F)(F)C(F)(F)C(F)(F)C(F)(F)C(F)(F)C(F)(F)C(F)(F)C(F)(F)C(F)(F)C(F)(F)C(F)(F)C(F)(F)C(F)(F)C(F)(F)C(F)(F)C(F)(F)C(F)(F)C(F)(F)C(F)(F)C(F)(F)C(F)(F)C(F)(F)C(F)(F)C(F)(F)C(F)(F)C(F)(F)C(F)(F)C(F)(F)C(F)(F)C(F)(F)C(F)(F)C(F)(F)C(F)(F)C(F)(F)C(F)(F)C(F)(F)C(F)(F)C(F)(F)C(F)(F)C(F)(F)C(F)(F)C(F)(F)C(F)(F)C(F)(F)C(F)(F)C(F)(F)C(F)(F)C(F)(F)C(F)(F)C(F)(F)C(F)(F)C(F)(F)C(F)(F)C(F)(F)C(F)(F)C(F)(F)C(F)(F)C(F)(F)C(F)(F)C(F)(F)C(F)(F)C(F)(F)C(F)(F)C(F)(F)C(F)(F)C(F)(F)C(F)(F)C(F)(F)C(F)(F)C(F)(F)C(F)(F)C(F)(F)C(F)(F)C(F)(F)C(F)(F)C(F)(F)C(F)(F)C(F)(F)C(F)(F)C(F)(F)C(F)(F)C(F)(F)C(F)(F)C(F)(F)C(F)(F)C(F)(F)C(F)(F)C(F)(F)C(F)(F)C(F)(F)C(F)(F)C(F)(F)C(F)(F)C(F)(F)C(F)(F)C(F)(F)C(F)(F)C(F)(F)C(F)(F)C(F)(F)C(F)(F)C(F)(F)C(F)(F)C(F)(F)C(F)(F)C(F)(F)C(F)(F)C(F)(F)C(F)(F)C(F)(F)C(F)(F)C(F)(F)C(F)(F)C(F)(F)C(F)(F)C(F)(F)C(F)(F)C(F)(F)C(F)(F)C(F)(F)C(F)(F)C(F)(F)C(F)(F)C(F)(F)C(F)(F)C(F)(F)C(F)(F)C(F)(F)C(F)(F)C(F)(F)C(F)(F)C(F)(F)C(F)(F)C(F)(F)C(F)(F)C(F)(F)C(F)(F)C(F)(F)C(F)(F)C(F)(F)C(F)(F)C(F)(F)C(F)(F)C(F)(F)C(F)(F)C(F)(F)C(F)(F)C(F)(F)C(F)(F)C(F)(F)C(F)(F)C(F)(F)C(F)(F)C(F)(F)C(F)(F)C(F)(F)C(F)(F)C(F)(F)C(F)(F)C(F)(F)C(F)(F)C(F)(F)C(F)(F)C(F)(F)C(F)(F)C(F)(F)C(F)(F)C(F)(F)C(F)(F)C(F)(F)C(F)(F)C(F)(F)C(F)(F)C(F)(F)C(F)(F)C(F)(F)C(F)(F)C(F)(F)C(F)(F)C(F)(F)C(F)(F)C(F)(F)C(F)(F)C(F)(F)C(F)(F)C(F)(F)C(F)(F)C(F)(F)C(F)(F)C(F)(F)C(F)(F)C(F)(F)C(F)(F)C(F)(F)C(F)(F)C(F)(F)C(F)(F)C(F)(F)C(F)(F)C(F)(F)C(F)(F)C(F)(F)C(F)(F)C(F)(F)C(F)(F)C(F)(F)C(F)(F)C(F)(F)C(F)(F)C(F)(F)C(F)(F)C(F)(F)C(F)(F)C(F)(F)C(F)(F)C(F)(F)C(F)(F)C(F)(F)C(F)(F)C(F)(F)C(F)(F)C(F)(F)C(F)(F)C(F)(F)C(F)(F)C(F)(F)C(F)(F)C(F)(F)C(F)(F)C(F)(F)C(F)(F)C(F)(F)C(F)(F)C(F)(F)C(F)(F)C(F)(F)C(F)(F)C(F)(F)C(F)(F)C(F)(F)C(F)(F)C(F)(F)C(F)(F)C(F)(F)C(F)(F)C(F)(F)C(F)(F)C(F)(F)C(F)(F)C(F)(F)C(F)(F)C(F)(F)C(F)(F)C(F)(F)C(F)(F)C(F)(F)C(F)(F)C(F)(F)C(F)(F)C(F)(F)C(F)(F)C(F)(F)C(F)(F)C(F)(F)C(F)(F)C(F)(F)C(F)(F)C(F)(F)C(F)(F)C(F)(F)C(F)(F)C(F)(F)C(F)(F)C(F)(F)C(F)(F)C(F)(F)C(F)(F)C(F)(F)C(F)(F)C(F)(F)C(F)(F)C(F)(F)C(F)(F)C(F)(F)C(F)(F)C(F)(F)C(F)(F)C(F)(F)C(F)(F)C(F)(F)C(F)(F)C(F)(F)C(F)(F)C(F)(F)C(F)(F)C(F)(F)C(F)(F)C(F)(F)C(F)(F)C(F)(F)C(F)(F)C(F)(F)C(F)(F)C(F)(F)C(F)(F)C(F)(F)C(F)(F)C(F)(F)C(F)(F)C(F)(F)C(F)(F)C(F)(F)C(F)(F)C(F)(F)C(F)(F)C(F)(F)C(F)(F)C(F)(F)C(F)(F)C(F)(F)C(F)(F)C(F)(F)C(F)(F)C(F)(F)C(F)(F)C(F)(F)C(F)(F)C(F)(F)C(F)(F)C(F)(F)C(F)(F)C(F)(F)C(F)(F)C(F)(F)C(F)(F)C(F)(F)C(F)(F)C(F)(F)C(F)(F)C(F)(F)C(F)(F)C(F)(F)C(F)(F)C(F)(F)C(F)(F)C(F)(F)C(F)(F)C(F)(F)C(F)(F)C(F)(F)C(F)(F)C(F)(F)C(F)(F)C(F)(F)C(F)(F)C(F)(F)C(F)(F)C(F)(F)C(F)(F)C(F)(F)C(F)(F)C(F)(F)C(F)(F)C(F)(F)C(F)(F)C(F)(F)C(F)(F)C(F)(F)C(F)(F)C(F)(F)C(F)(F)C(F)(F)C(F)(F)C(F)(F)C(F)(F)C(F)(F)C(F)(F)C(F)(F)C(F)(F)C(F)(F)C(F)(F)C(F)(F)C(F)(F)C(F)(F)C(F)(F)C(F)(F)C(F)(F)C(F)(F)C(F)(F)C(F)(F)C(F)(F)C(F)(F)C(F)(F)C(F)(F)C(F)(F)C(F)(F)C(F)(F)C(F)(F)C(F)(F)C(F)(F)C(F)(F)C(F)(F)C(F)(F)C(F)(F)C(F)(F)C(F)(F)C(F)(F)C(F)(F)C(F)(F)C(F)(F)C(F)(F)C(F)(F)C(F)(F)C(F)(F)C(F)(F)C(F)(F)C(F)(F)C(F)(F)C(F)(F)C(F)(F)C(F)(F)C(F)(F)C(F)(F)C(F)(F)C(F)(F)C(F)(F)C(F)(F)C(F)(F)C(F)(F)C(F)(F)C(F)(F)C(F)(F)C(F)(F)C(F)(F)C(F)(F)C(F)(F)C(F)(F)C(F)(F)C(F)(F)C(F)(F)C(F)(F)C(F)(F)C(F)(F)C(F)(F)C(F)(F)C(F)(F)C(F)(F)C(F)(F)C(F)(F)C(F)(F)C(F)(F)C(F)(F)C(F)(F)C(F)(F)C(F)(F)C(F)(F)C(F)(F)C(F)(F)C(F)(F)C(F)(F)C(F)(F)C(F)(F)C(F)(F)C(F)(F)C(F)(F)C(F)(F)C(F)(F)C(F)(F)C(F)(F)C(F)(F)C(F)(F)C(F)(F)C(F)(F)C(F)(F)C(F)(F)C(F)(F)C(F)(F)C(F)(F)C(F)(F)C(F)(F)C(F)(F)C(F)(F)C(F)(F)C(F)(F)C(F)(F)C(F)(F)C(F)(F)C(F)(F)C(F)(F)C(F)(F)C(F)(F)C(F)(F)C(F)(F)C(F)(F)C(F)(F)C(F)(F)C(F)(F)C(F)(F)C(F)(F)C(F)(F)C(F)(F)C(F)(F)C(F)(F)C(F)(F)C(F)(F)C(F)(F)C(F)(F)C(F)(F)C(F)(F)C(F)(F)C(F)(F)C(F)(F)C(F)(F)C(F)(F)C(F)(F)C(F)(F)C(F)(F)C(F)(F)C(F)(F)C(F)(F)C(F)(F)C(F)(F)C(F)(F)C(F)(F)C(F)(F)C(F)(F)C(F)(F)C(F)(F)C(F)(F)C(F)(F)C(F)(F)C(F)(F)C(F)(F)C(F)(F)C(F)(F)C(F)(F)C(F)(F)C(F)(F)C(F)(F)C(F)(F)C(F)(F)C(F)(F)C(F)(F)C(F)(F)C(F)(F)C(F)(F)C(F)(F)C(F)(F)C(F)(F)C(F)(F)C(F)(F)C(F)(F)C(F)(F)C(F)(F)C(F)(F)C(F)(F)C(F)(F)C(F)(F)C(F)(F)C(F)(F)C(F)(F)C(F)(F)C(F)(F)C(F)(F)C(F)(F)C(F)(F)C(F)(F)C(F)(F)C(F)(F)C(F)(F)C(F)(F)C(F)(F)C(F)(F)C(F)(F)C(F)(F)C(F)(F)C(F)(F)C(F)(F)C(F)(F)C(F)(F)C(F)(F)C(F)(F)C(F)(F)C(F)(F)C(F)(F)C(F)(F)C(F)(F)C(F)(F)C(F)(F)C(F)(F)C(F)(F)C(F)(F)C(F)(F)C(F)(F)C(F)(F)C(F)(F)C(F)(F)C(F)(F)C(F)(F)C(F)(F)C(F)(F)C(F)(F)C(F)(F)C(F)(F)C(F)(F)C(F)(F)C(F)(F)C(F)(F)C(F)(F)C(F)(F)C(F)(F)C(F)(F)C(F)(F)C(F)(F) |        |       |      |   |     |



[illegible]



[illegible]







[illegible]



|         |                                                                                                                                                                                                                                                                                                                           |               |                                                                                                                                    |        |       |      |   |     |
|---------|---------------------------------------------------------------------------------------------------------------------------------------------------------------------------------------------------------------------------------------------------------------------------------------------------------------------------|---------------|------------------------------------------------------------------------------------------------------------------------------------|--------|-------|------|---|-----|
| QL04183 | (2Z)-4,4,5,6,6,7,7,8,8,9,9-Tridecafluoronon-2-en-1-ol<br>(2E)-4,5,5,5-Tetrafluoro-4-(trifluoromethyl)pent-2-en-1-ol                                                                                                                                                                                                       | 83707-01-1    | OCC=C(C(F)(F)C(F)(F)C(F)(F)C(F)(F)C(F)(F)F                                                                                         | -8.59  | 46.43 | 2.46 | P | IN  |
| QL04184 | 4,4,5,5,6,6,7,7,8,8,9,9,10,10,11,11,11-hepta-decafluoroundec-2-en-1-ol                                                                                                                                                                                                                                                    | 83706-95-0    | OCC=CC(F)(C(F)(F)C(F)(F)F                                                                                                          | -6.08  | 36.84 | 1.69 | P | IN  |
| QL04185 | hepta-decafluoroundec-2-en-1-ol                                                                                                                                                                                                                                                                                           | 2340-84-3     | OCC=CC(F)(F)C(F)(F)C(F)(F)C(F)(F)C(F)(F)C(F)(F)F                                                                                   | -9.38  | 50.00 | 2.68 | P | IN  |
| QL04186 | 4,4,5,5,6,6,7,7,8,8,9,9,9-Tridecafluoro-2-nonen-1-ol                                                                                                                                                                                                                                                                      | 38550-47-9    | OCC=CC(F)(F)C(F)(F)C(F)(F)C(F)(F)C(F)(F)C(F)(F)F                                                                                   | -8.59  | 46.43 | 2.46 | P | IN  |
| QL04189 | 4,4,5,5,6,6,7,7,7-Nonafluorohept-2-en-1-ol                                                                                                                                                                                                                                                                                | 72016-05-8    | OCC=CC(F)(F)C(F)(F)C(F)(F)C(F)(F)F                                                                                                 | -7.60  | 40.91 | 2.21 | P | IN  |
| QL04190 | 4,4,5,5,6,6,6-Heptafluorohex-2-en-1-ol<br>(Perfluorocyclohexyl)methanol                                                                                                                                                                                                                                                   | 679-03-8      | OCC=CC(F)(F)C(F)(F)C(F)(F)F                                                                                                        | -6.71  | 36.84 | 1.95 | P | IN  |
| QL04192 | [4-(Hepta-decafluorooctyl)phenyl]methanol                                                                                                                                                                                                                                                                                 | 28788-68-3    | OCC1(F)C(F)(F)C(F)(F)C(F)(F)C(F)(F)C1(F)F                                                                                          | -6.22  | 50.00 | 1.38 | P | IN  |
| QL04193 | [4-(Hepta-decafluorooctyl)phenyl]methanol<br>[4-(3,3,4,4,5,5,6,6,7,7,8,8,9,9,10,10,10-Hepta-decafluorodecyl)phenyl]methanol                                                                                                                                                                                               | 163114-33-8   | OCC1=CC=C(C=C1)C(F)(F)C(F)(F)C(F)(F)C(F)(F)C(F)(F)C(F)(F)F                                                                         | -9.40  | 42.50 | 2.90 | P | IN  |
| QL04194 | Hepta-decafluorodecyl]phenyl]methanol                                                                                                                                                                                                                                                                                     | 356055-77-1   | OCC1=CC=C(CCCC(F)(F)C(F)(F)C(F)(F)C(F)(F)C(F)(F)C(F)(F)C(F)(F)C=C1                                                                 | -9.49  | 36.96 | 3.09 | P | IN  |
| QL04195 | 4-(Perfluorohexyl)ethyl]phenyl]methanol                                                                                                                                                                                                                                                                                   | 356055-76-0   | OCC1=CC=C(CCCC(F)(F)C(F)(F)C(F)(F)C(F)(F)C(F)(F)C=C1                                                                               | -8.69  | 32.50 | 2.88 | P | IN  |
| QL04196 | [4-(3,3,4,4,5,5,6,6,6-Nonafluorohexyl)phenyl]methanol<br>[4-[(4,4,5,5,6,6,7,7,8,8,9,9,10,10,11,11-Hepta-decafluoroundecyl)oxy]phenyl]methanol                                                                                                                                                                             | 892154-66-4   | OCC1=CC=C(CCCC(F)(F)C(F)(F)C(F)(F)C(F)(F)C=C1                                                                                      | -7.79  | 26.47 | 2.68 | P | OUT |
| QL04197 | Hepta-decafluoroundecyl]oxy]phenyl]methanol<br>[4-[(4,4,5,5,6,6,7,7,8,8,9,9-Tridecafluoroononyl)oxy]phenyl]methanol                                                                                                                                                                                                       | 892155-69-0   | OCC1=CC=C(OC CCC(F)(F)C(F)(F)C(F)(F)C(F)(F)C(F)(F)C(F)(F)C(F)(F)C=C1                                                               | -9.63  | 34.00 | 3.23 | P | OUT |
| QL04198 | Tridecafluoroononyl]oxy]phenyl]methanol                                                                                                                                                                                                                                                                                   | 957206-65-4   | OCC1=CC=C(COCCCC(F)(F)C(F)(F)C(F)(F)C(F)(F)C(F)(F)C=C1                                                                             | -8.87  | 29.55 | 3.04 | P | OUT |
| QL04199 | 4-[3-(Perfluorobutyl)-1-propyloxy]benzyl alcohol<br>[3,4,5-Tris(1,1,2-trifluoro-2-(heptafluoropropoxy)ethoxy]phenyl]methanol                                                                                                                                                                                              | 892154-51-7   | OCC1=CC=C(COCCCC(F)(F)C(F)(F)C(F)(F)C(F)(F)C=C1<br>OCc1cc(OC(F)(F)C(F)C(F)OC(F)(F)C(F)F)c(OC(F)(F)C(F)C(F)F)c(OC(F)(F)C(F)C(F)F)c1 | -8.06  | 23.68 | 2.87 | P | OUT |
| QL04200 | (heptafluoropropoxy)ethoxy]phenyl]methanol<br>[4-(1,1,1,2,2,3,3-Heptafluoropropan-2-yl)phenyl]methanol                                                                                                                                                                                                                    | 1233312-87-2  | F)OC(F)(F)C(F)(F)C(F)(F)C1                                                                                                         | -10.20 | 44.78 | 3.17 | P | OUT |
| QL04201 | 3-(Heptafluoropropyl)pentane-1,5-diol                                                                                                                                                                                                                                                                                     | 1137162-24-3  | OCC1ccc(cc1)C(F)(C(F)(F)C(F)(F)F                                                                                                   | -6.59  | 28.00 | 2.15 | P | OUT |
| QL04202 | 3-(Heptafluoropropyl)pentane-1,5-diol                                                                                                                                                                                                                                                                                     | 678-93-3      | OCCC(CCO)C(F)(F)C(F)(F)C(F)(F)F                                                                                                    | -5.84  | 25.00 | 1.92 | P | OUT |
| QL04203 | 2-(Hepta-decafluorooctyl)butane-1,4-diol                                                                                                                                                                                                                                                                                  | 135440-42-5   | OCCC(CO)C(F)(F)C(F)(F)C(F)(F)C(F)(F)C(F)(F)C(F)(F)F                                                                                | -8.88  | 42.50 | 2.69 | P | IN  |
| QL04204 | 2(Perfluoro-2-propyl)ethanol                                                                                                                                                                                                                                                                                              | 90999-87-4    | OCCC(F)(C(F)(F)C(F)(F)F                                                                                                            | -5.56  | 38.89 | 1.42 | P | IN  |
| QL04205 | 3,3,4,4,5,6,6,6-Octafluoro-5-(trifluoromethyl)hexan-1-ol                                                                                                                                                                                                                                                                  | 89076-11-9    | OCCC(F)(F)C(F)(F)C(F)(C(F)(F)C(F)(F)F                                                                                              | -7.12  | 45.83 | 1.87 | P | IN  |
| QL04206 | 3,3,4,4,5,5,6,6,7,8,8,8-Dodecafluoro-7-(trifluoromethyl)octan-1-ol                                                                                                                                                                                                                                                        | 20015-46-7    | OCCCC(F)(F)C(F)(F)C(F)(F)C(F)(F)C(F)(F)C(F)(F)F                                                                                    | -8.24  | 50.00 | 2.22 | P | IN  |
| QL04207 | 2-(Perfluoro-7-methyloctyl)ethanol                                                                                                                                                                                                                                                                                        | 31200-98-3    | OCCC(F)(F)C(F)(F)C(F)(F)C(F)(F)C(F)(F)C(F)(F)C(F)(F)F                                                                              | -9.11  | 52.78 | 2.50 | P | IN  |
| QL04208 | 3,3,4,4,5,5,6,6,7,7,8,8,9,9,10,10,11,12,12-Icosafluoro-11-(trifluoromethyl)dodecan-1-ol                                                                                                                                                                                                                                   | 194427-39-9   | OCCCC(F)(F)C(F)(F)C(F)(F)C(F)(F)C(F)(F)C(F)(F)C(F)(F)C(F)(F)C(F)(F)F                                                               | -9.81  | 54.76 | 2.73 | P | IN  |
| QL04209 | 3,3,4,4,5,5,6,6,7,7,8,8,9,9,10,10,11,11,12,12,13,14,14,15,15,15-Heptaacosiafluoropentadecan-1-ol                                                                                                                                                                                                                          | 176676-70-3   | OCCCC(F)(F)C(F)(F)C(F)(F)C(F)(F)C(F)(F)C(F)(F)C(F)(F)C(F)(F)C(F)(F)C(F)(F)F                                                        | -10.72 | 56.25 | 3.06 | P | OUT |
| QL04210 | 3,3,4,4,5,5,6,6,7,7,8,8,9,9,10,10,11,11,12,13,13,13-Tricosafluorotridecan-1-ol                                                                                                                                                                                                                                            | 1545-59-1     | OCCCC(F)(F)C(F)(F)C(F)(F)C(F)(F)C(F)(F)C(F)(F)C(F)(F)C(F)(F)C(F)(F)F                                                               | -10.18 | 54.76 | 2.88 | P | OUT |
| QL04212 | 3,3,4,4,5,5,6,6,7,7,8,8,9,9,10,10,11,11,11-Nonadecafluoroundecan-1-ol                                                                                                                                                                                                                                                     | 87017-97-8    | OCCCC(F)(F)C(F)(F)C(F)(F)C(F)(F)C(F)(F)C(F)(F)C(F)(F)F                                                                             | -9.55  | 52.78 | 2.68 | P | IN  |
| QL04213 | 3,3,4,4,5,5,6,6,7,7,8,8,9,9,9-Pentadecafluorononan-1-ol                                                                                                                                                                                                                                                                   | 755-02-2      | OCCC(F)(F)C(F)(F)C(F)(F)C(F)(F)C(F)(F)C(F)(F)F                                                                                     | -8.79  | 50.00 | 2.44 | P | IN  |
| QL04214 | 52 Fluorotelomer alcohol                                                                                                                                                                                                                                                                                                  | 185689-57-0   | OCCC(F)(F)C(F)(F)C(F)(F)C(F)(F)C(F)(F)F                                                                                            | -7.84  | 45.83 | 2.17 | P | IN  |
| QL04216 | 32 Fluorotelomer alcohol                                                                                                                                                                                                                                                                                                  | 755-40-8      | OCCC(F)(F)C(F)(F)C(F)(F)F                                                                                                          | -6.61  | 38.89 | 1.85 | P | IN  |
| QL04217 | 22 fluorotelomer alcohol                                                                                                                                                                                                                                                                                                  | 54949-74-5    | OCCC(F)(F)C(F)(F)F                                                                                                                 | -5.43  | 33.33 | 1.52 | P | IN  |
| QL04218 | Poly(difluoromethylene), .alpha.-fluoro.-omega.-(2-hydroxyethyl)-, dihydrogen 2-hydroxy-1,2,3-propanetricarboxylate Poly(oxy-1,2-ethanediyl), alpha-hydro-omega-hydroxy-, ether with alpha-fluoro-omega-(2-hydroxyethyl)poly(difluoromethylene)<br>(11) Poly(difluoromethylene), .alpha.-fluoro.-omega.-(2-hydroxyethyl)- | 65605-56-3 65 | OCCC(F)(F)F                                                                                                                        | -4.53  | 25.00 | 1.38 | P | OUT |
| QL04219 | 5,5,6,6,7,7,8,8,9,9,10,10,10-Tridecafluoro-3-iododecan-1-ol                                                                                                                                                                                                                                                               | 16083-68-4    | OCCCC(I)CC(F)(F)C(F)(F)C(F)(F)C(F)(F)C(F)(F)F                                                                                      | -8.47  | 42.42 | 2.52 | P | IN  |
| QL04220 | 5,5,6,6,7,7,8,8,8-Nonafluoro-3-iodooctan-1-ol                                                                                                                                                                                                                                                                             | 109574-81-4   | OCCCC(I)CC(F)(F)C(F)(F)C(F)(F)C(F)(F)F                                                                                             | -7.50  | 37.04 | 2.27 | P | IN  |
| QL04221 | 5,5,6,6,7,7,7-Heptafluoro-3-iodoheptan-1-ol<br>5,5,6,6,7,7,7-Heptafluoro-4,4-bis(trifluoromethyl)heptan-1-ol                                                                                                                                                                                                              | 89621-93-2    | OCCCC(I)CC(F)(F)C(F)(F)C(F)(F)F                                                                                                    | -6.96  | 33.33 | 2.15 | P | IN  |
| QL04222 | 3-(Perfluoroisopropyl)propanol                                                                                                                                                                                                                                                                                            | 110254-90-5   | OCCCCC(C(F)(F)C(F)(F)C(F)(F)C(F)(F)C(F)(F)F                                                                                        | -7.35  | 43.33 | 2.04 | P | IN  |
| QL04223 | 3-(Perfluoroisopropyl)propanol                                                                                                                                                                                                                                                                                            | 29819-73-6    | OCCCCC(F)(C(F)(F)C(F)(F)F                                                                                                          | -5.84  | 33.33 | 1.69 | P | IN  |
| QL04224 | 3-(Perfluorooctyl)propanol                                                                                                                                                                                                                                                                                                | 1651-41-8     | OCCCCC(F)(F)C(F)(F)C(F)(F)C(F)(F)C(F)(F)C(F)(F)F                                                                                   | -9.19  | 47.22 | 2.68 | P | IN  |
| QL04225 | 73 fluorotelomer alcohol                                                                                                                                                                                                                                                                                                  | 25600-66-2    | OCCCCC(F)(F)C(F)(F)C(F)(F)C(F)(F)C(F)(F)C(F)(F)F                                                                                   | -8.64  | 45.45 | 2.51 | P | IN  |
| QL04226 | 3-(Perfluorohexyl)propanol                                                                                                                                                                                                                                                                                                | 80806-68-4    | OCCCCC(F)(F)C(F)(F)C(F)(F)C(F)(F)C(F)(F)F                                                                                          | -8.38  | 43.33 | 2.46 | P | IN  |
| QL04227 | 4,4,5,5,6,6,7,7,8,8,8-Undecafluorooctan-1-ol                                                                                                                                                                                                                                                                              | 1404193-88-9  | OCCCCC(F)(F)C(F)(F)C(F)(F)C(F)(F)F                                                                                                 | -7.69  | 40.74 | 2.25 | P | IN  |
| QL04228 | 3-(Perfluorobutyl)-1-propanol                                                                                                                                                                                                                                                                                             | 83310-97-8    | OCCCCC(F)(F)C(F)(F)C(F)(F)F                                                                                                        | -7.37  | 37.50 | 2.21 | P | IN  |
| QL04229 | 3-(Perfluoropropyl)propanol                                                                                                                                                                                                                                                                                               | 679-02-7      | OCCCCC(F)(F)C(F)(F)C(F)(F)F                                                                                                        | -6.47  | 33.33 | 1.95 | P | IN  |
| QL04230 | 3-(Perfluoroethyl)propanol                                                                                                                                                                                                                                                                                                | NOCAS_869964  | OCCCCC(F)(F)C(F)(F)F                                                                                                               | -5.79  | 27.78 | 1.82 | P | OUT |
| QL04231 | 4,5,5,5-Tetrafluoro-4-(heptafluoropropoxy)pentan-1-ol<br>6,6,7,7,8,8,9,9,10,10,11,11,11-Tridecafluoro-4-iodoundecan-1-ol                                                                                                                                                                                                  | 243128-41-8   | OCCCCC(F)(OC(F)(F)C(F)(F)C(F)(F)C(F)(F)F                                                                                           | -7.53  | 39.29 | 2.22 | P | IN  |
| QL04232 | iodoundecan-1-ol                                                                                                                                                                                                                                                                                                          | 132665-00-0   | OCCCCC(I)CC(F)(F)C(F)(F)C(F)(F)C(F)(F)C(F)(F)F                                                                                     | -8.70  | 38.89 | 2.72 | P | IN  |
| QL04233 | 5,5,6,6,7,7,8,8,9,9,10,10,10-Tridecafluorodecan-1-ol                                                                                                                                                                                                                                                                      | 39239-79-7    | OCCCCC(F)(F)C(F)(F)C(F)(F)C(F)(F)C(F)(F)C(F)(F)F                                                                                   | -8.27  | 39.39 | 2.52 | P | IN  |
| QL04234 | 44 Fluorotelomer alcohol                                                                                                                                                                                                                                                                                                  | 3792-02-7     | OCCCCC(F)(F)C(F)(F)C(F)(F)C(F)(F)F                                                                                                 | -7.28  | 33.33 | 2.28 | P | IN  |



|         |                                                                                                  |              |                                                                                                                                                                                                                                                                                                                                                                                                                                                                                                                                                                                                                                                                                                                                                                                                                                                                                                                                                                                                                                                                                                                                                                                                                                                                                                                                                                                                                                                                                                                                                                                                                                                                                                                                                                                                                                                                                                                                                                                                                                                                                                                                                                                                                                                                                                                                                                                                                                                                                                                                                                                                                                                                                                                                                                                                                                                                                                                                                                                                                                                                                                                                                                                                                                                                                                                                                                                                                                                                                                                                                                                                                                                                                                                                                                                                                                                                                                                                                                                                                                                                                                                                                                                                                                                                                                                                                                                                                                                                                                                                                                                                                                                                                                                                                                                                                                                                                                                                                                                                                                                                                                                                                                                                                                                                                                                                                                                                                                                                                                                                                                                                                                                                                                                                                                                                                                                                                                                                                                                                                                                                                                                                                                                                                                                                                                                                                                                                                                                                                                                                                                                                                                                                                                       |       |       |      |   |     |
|---------|--------------------------------------------------------------------------------------------------|--------------|-------------------------------------------------------------------------------------------------------------------------------------------------------------------------------------------------------------------------------------------------------------------------------------------------------------------------------------------------------------------------------------------------------------------------------------------------------------------------------------------------------------------------------------------------------------------------------------------------------------------------------------------------------------------------------------------------------------------------------------------------------------------------------------------------------------------------------------------------------------------------------------------------------------------------------------------------------------------------------------------------------------------------------------------------------------------------------------------------------------------------------------------------------------------------------------------------------------------------------------------------------------------------------------------------------------------------------------------------------------------------------------------------------------------------------------------------------------------------------------------------------------------------------------------------------------------------------------------------------------------------------------------------------------------------------------------------------------------------------------------------------------------------------------------------------------------------------------------------------------------------------------------------------------------------------------------------------------------------------------------------------------------------------------------------------------------------------------------------------------------------------------------------------------------------------------------------------------------------------------------------------------------------------------------------------------------------------------------------------------------------------------------------------------------------------------------------------------------------------------------------------------------------------------------------------------------------------------------------------------------------------------------------------------------------------------------------------------------------------------------------------------------------------------------------------------------------------------------------------------------------------------------------------------------------------------------------------------------------------------------------------------------------------------------------------------------------------------------------------------------------------------------------------------------------------------------------------------------------------------------------------------------------------------------------------------------------------------------------------------------------------------------------------------------------------------------------------------------------------------------------------------------------------------------------------------------------------------------------------------------------------------------------------------------------------------------------------------------------------------------------------------------------------------------------------------------------------------------------------------------------------------------------------------------------------------------------------------------------------------------------------------------------------------------------------------------------------------------------------------------------------------------------------------------------------------------------------------------------------------------------------------------------------------------------------------------------------------------------------------------------------------------------------------------------------------------------------------------------------------------------------------------------------------------------------------------------------------------------------------------------------------------------------------------------------------------------------------------------------------------------------------------------------------------------------------------------------------------------------------------------------------------------------------------------------------------------------------------------------------------------------------------------------------------------------------------------------------------------------------------------------------------------------------------------------------------------------------------------------------------------------------------------------------------------------------------------------------------------------------------------------------------------------------------------------------------------------------------------------------------------------------------------------------------------------------------------------------------------------------------------------------------------------------------------------------------------------------------------------------------------------------------------------------------------------------------------------------------------------------------------------------------------------------------------------------------------------------------------------------------------------------------------------------------------------------------------------------------------------------------------------------------------------------------------------------------------------------------------------------------------------------------------------------------------------------------------------------------------------------------------------------------------------------------------------------------------------------------------------------------------------------------------------------------------------------------------------------------------------------------------------------------------------------------------------------------------------|-------|-------|------|---|-----|
| QL04235 | 5,5,6,6,7,7,7-Heptafluoroheptan-1-ol<br>(SE)-7,7,8,8,9,10,10,10-Nonafluoro-5-iododec-5-en-1-ol   | 883543-64-4  | OCCCCC(F)(F)C(F)(F)C(F)(F)F                                                                                                                                                                                                                                                                                                                                                                                                                                                                                                                                                                                                                                                                                                                                                                                                                                                                                                                                                                                                                                                                                                                                                                                                                                                                                                                                                                                                                                                                                                                                                                                                                                                                                                                                                                                                                                                                                                                                                                                                                                                                                                                                                                                                                                                                                                                                                                                                                                                                                                                                                                                                                                                                                                                                                                                                                                                                                                                                                                                                                                                                                                                                                                                                                                                                                                                                                                                                                                                                                                                                                                                                                                                                                                                                                                                                                                                                                                                                                                                                                                                                                                                                                                                                                                                                                                                                                                                                                                                                                                                                                                                                                                                                                                                                                                                                                                                                                                                                                                                                                                                                                                                                                                                                                                                                                                                                                                                                                                                                                                                                                                                                                                                                                                                                                                                                                                                                                                                                                                                                                                                                                                                                                                                                                                                                                                                                                                                                                                                                                                                                                                                                                                                                           | -6.74 | 29.17 | 2.17 | P | IN  |
| QL04236 | 6,6,7,7,8,8,9,10,10,11,11,11-Tridecafluoroundecan-1-ol                                           | 137648-89-6  | OCCCC(I)=C/C(F)(F)C(F)(F)C(F)(F)C(F)(F)F                                                                                                                                                                                                                                                                                                                                                                                                                                                                                                                                                                                                                                                                                                                                                                                                                                                                                                                                                                                                                                                                                                                                                                                                                                                                                                                                                                                                                                                                                                                                                                                                                                                                                                                                                                                                                                                                                                                                                                                                                                                                                                                                                                                                                                                                                                                                                                                                                                                                                                                                                                                                                                                                                                                                                                                                                                                                                                                                                                                                                                                                                                                                                                                                                                                                                                                                                                                                                                                                                                                                                                                                                                                                                                                                                                                                                                                                                                                                                                                                                                                                                                                                                                                                                                                                                                                                                                                                                                                                                                                                                                                                                                                                                                                                                                                                                                                                                                                                                                                                                                                                                                                                                                                                                                                                                                                                                                                                                                                                                                                                                                                                                                                                                                                                                                                                                                                                                                                                                                                                                                                                                                                                                                                                                                                                                                                                                                                                                                                                                                                                                                                                                                                              | -7.85 | 32.26 | 2.55 | P | IN  |
| QL04237 | 6,6,7,7,8,8,9,9,9-Nonafluorononan-1-ol                                                           | 134052-02-1  | OCCCCC(F)(F)C(F)(F)C(F)(F)C(F)(F)C(F)(F)F                                                                                                                                                                                                                                                                                                                                                                                                                                                                                                                                                                                                                                                                                                                                                                                                                                                                                                                                                                                                                                                                                                                                                                                                                                                                                                                                                                                                                                                                                                                                                                                                                                                                                                                                                                                                                                                                                                                                                                                                                                                                                                                                                                                                                                                                                                                                                                                                                                                                                                                                                                                                                                                                                                                                                                                                                                                                                                                                                                                                                                                                                                                                                                                                                                                                                                                                                                                                                                                                                                                                                                                                                                                                                                                                                                                                                                                                                                                                                                                                                                                                                                                                                                                                                                                                                                                                                                                                                                                                                                                                                                                                                                                                                                                                                                                                                                                                                                                                                                                                                                                                                                                                                                                                                                                                                                                                                                                                                                                                                                                                                                                                                                                                                                                                                                                                                                                                                                                                                                                                                                                                                                                                                                                                                                                                                                                                                                                                                                                                                                                                                                                                                                                             | -8.54 | 36.11 | 2.72 | P | IN  |
| QL04238 | 7,8,8,8-Tetrafluoro-7-(trifluoromethyl)octan-1-ol                                                | 219557-62-7  | OCCCCC(F)(F)C(F)(F)C(F)(F)C(F)(F)C(F)(F)F                                                                                                                                                                                                                                                                                                                                                                                                                                                                                                                                                                                                                                                                                                                                                                                                                                                                                                                                                                                                                                                                                                                                                                                                                                                                                                                                                                                                                                                                                                                                                                                                                                                                                                                                                                                                                                                                                                                                                                                                                                                                                                                                                                                                                                                                                                                                                                                                                                                                                                                                                                                                                                                                                                                                                                                                                                                                                                                                                                                                                                                                                                                                                                                                                                                                                                                                                                                                                                                                                                                                                                                                                                                                                                                                                                                                                                                                                                                                                                                                                                                                                                                                                                                                                                                                                                                                                                                                                                                                                                                                                                                                                                                                                                                                                                                                                                                                                                                                                                                                                                                                                                                                                                                                                                                                                                                                                                                                                                                                                                                                                                                                                                                                                                                                                                                                                                                                                                                                                                                                                                                                                                                                                                                                                                                                                                                                                                                                                                                                                                                                                                                                                                                             | -7.48 | 30.00 | 2.46 | P | IN  |
| QL04239 | 7,7,8,8,9,10,10,11,11,12,12,13,14,14,14-Hexadecafluoro-13-(trifluoromethyl)tetradecan-1-ol       | 220469-13-6  | OCCCCC(C)(F)(F)C(F)(F)C(F)(F)F                                                                                                                                                                                                                                                                                                                                                                                                                                                                                                                                                                                                                                                                                                                                                                                                                                                                                                                                                                                                                                                                                                                                                                                                                                                                                                                                                                                                                                                                                                                                                                                                                                                                                                                                                                                                                                                                                                                                                                                                                                                                                                                                                                                                                                                                                                                                                                                                                                                                                                                                                                                                                                                                                                                                                                                                                                                                                                                                                                                                                                                                                                                                                                                                                                                                                                                                                                                                                                                                                                                                                                                                                                                                                                                                                                                                                                                                                                                                                                                                                                                                                                                                                                                                                                                                                                                                                                                                                                                                                                                                                                                                                                                                                                                                                                                                                                                                                                                                                                                                                                                                                                                                                                                                                                                                                                                                                                                                                                                                                                                                                                                                                                                                                                                                                                                                                                                                                                                                                                                                                                                                                                                                                                                                                                                                                                                                                                                                                                                                                                                                                                                                                                                                        | -6.18 | 23.33 | 2.11 | P | OUT |
| QL04240 | 7,7,8,8,9,9,10,10,11,11,12,12,13,13,14,14,14-hepta-decafluoratetradecan-1-ol                     | 390410-82-9  | OCCCCCCC(F)(F)C(F)(F)C(F)(F)C(F)(F)C(F)(F)C(F)(F)C(F)(F)F                                                                                                                                                                                                                                                                                                                                                                                                                                                                                                                                                                                                                                                                                                                                                                                                                                                                                                                                                                                                                                                                                                                                                                                                                                                                                                                                                                                                                                                                                                                                                                                                                                                                                                                                                                                                                                                                                                                                                                                                                                                                                                                                                                                                                                                                                                                                                                                                                                                                                                                                                                                                                                                                                                                                                                                                                                                                                                                                                                                                                                                                                                                                                                                                                                                                                                                                                                                                                                                                                                                                                                                                                                                                                                                                                                                                                                                                                                                                                                                                                                                                                                                                                                                                                                                                                                                                                                                                                                                                                                                                                                                                                                                                                                                                                                                                                                                                                                                                                                                                                                                                                                                                                                                                                                                                                                                                                                                                                                                                                                                                                                                                                                                                                                                                                                                                                                                                                                                                                                                                                                                                                                                                                                                                                                                                                                                                                                                                                                                                                                                                                                                                                                             | -9.26 | 39.58 | 2.92 | P | IN  |
| QL04241 | 6-(Perfluorohexyl)hexanol                                                                        | 129794-54-3  | OCCCCCCC(F)(F)C(F)(F)C(F)(F)C(F)(F)C(F)(F)C(F)(F)F                                                                                                                                                                                                                                                                                                                                                                                                                                                                                                                                                                                                                                                                                                                                                                                                                                                                                                                                                                                                                                                                                                                                                                                                                                                                                                                                                                                                                                                                                                                                                                                                                                                                                                                                                                                                                                                                                                                                                                                                                                                                                                                                                                                                                                                                                                                                                                                                                                                                                                                                                                                                                                                                                                                                                                                                                                                                                                                                                                                                                                                                                                                                                                                                                                                                                                                                                                                                                                                                                                                                                                                                                                                                                                                                                                                                                                                                                                                                                                                                                                                                                                                                                                                                                                                                                                                                                                                                                                                                                                                                                                                                                                                                                                                                                                                                                                                                                                                                                                                                                                                                                                                                                                                                                                                                                                                                                                                                                                                                                                                                                                                                                                                                                                                                                                                                                                                                                                                                                                                                                                                                                                                                                                                                                                                                                                                                                                                                                                                                                                                                                                                                                                                    | -9.21 | 37.78 | 2.95 | P | IN  |
| QL04242 | 7,7,8,8,9,9,10,10,10-nonafluorodecan-1-ol                                                        | 161981-35-7  | OCCCCC(F)(F)C(F)(F)C(F)(F)C(F)(F)C(F)(F)C(F)(F)F                                                                                                                                                                                                                                                                                                                                                                                                                                                                                                                                                                                                                                                                                                                                                                                                                                                                                                                                                                                                                                                                                                                                                                                                                                                                                                                                                                                                                                                                                                                                                                                                                                                                                                                                                                                                                                                                                                                                                                                                                                                                                                                                                                                                                                                                                                                                                                                                                                                                                                                                                                                                                                                                                                                                                                                                                                                                                                                                                                                                                                                                                                                                                                                                                                                                                                                                                                                                                                                                                                                                                                                                                                                                                                                                                                                                                                                                                                                                                                                                                                                                                                                                                                                                                                                                                                                                                                                                                                                                                                                                                                                                                                                                                                                                                                                                                                                                                                                                                                                                                                                                                                                                                                                                                                                                                                                                                                                                                                                                                                                                                                                                                                                                                                                                                                                                                                                                                                                                                                                                                                                                                                                                                                                                                                                                                                                                                                                                                                                                                                                                                                                                                                                      | -8.48 | 33.33 | 2.78 | P | IN  |
| QL04243 | 9,9,10,10,11,11,12,12-Nonafluoro-7-iodododecan-1-ol                                              | 181042-39-7  | OCCCCC(C)(F)(F)C(F)(F)C(F)(F)F                                                                                                                                                                                                                                                                                                                                                                                                                                                                                                                                                                                                                                                                                                                                                                                                                                                                                                                                                                                                                                                                                                                                                                                                                                                                                                                                                                                                                                                                                                                                                                                                                                                                                                                                                                                                                                                                                                                                                                                                                                                                                                                                                                                                                                                                                                                                                                                                                                                                                                                                                                                                                                                                                                                                                                                                                                                                                                                                                                                                                                                                                                                                                                                                                                                                                                                                                                                                                                                                                                                                                                                                                                                                                                                                                                                                                                                                                                                                                                                                                                                                                                                                                                                                                                                                                                                                                                                                                                                                                                                                                                                                                                                                                                                                                                                                                                                                                                                                                                                                                                                                                                                                                                                                                                                                                                                                                                                                                                                                                                                                                                                                                                                                                                                                                                                                                                                                                                                                                                                                                                                                                                                                                                                                                                                                                                                                                                                                                                                                                                                                                                                                                                                                        | -7.45 | 27.27 | 2.52 | P | OUT |
| QL04244 | 9,9,10,10,11,11,12,12-Nonafluorododecan-1-ol                                                     | 172701-28-9  | OCCCCC(I)CC(F)(F)C(F)(F)C(F)(F)C(F)(F)F                                                                                                                                                                                                                                                                                                                                                                                                                                                                                                                                                                                                                                                                                                                                                                                                                                                                                                                                                                                                                                                                                                                                                                                                                                                                                                                                                                                                                                                                                                                                                                                                                                                                                                                                                                                                                                                                                                                                                                                                                                                                                                                                                                                                                                                                                                                                                                                                                                                                                                                                                                                                                                                                                                                                                                                                                                                                                                                                                                                                                                                                                                                                                                                                                                                                                                                                                                                                                                                                                                                                                                                                                                                                                                                                                                                                                                                                                                                                                                                                                                                                                                                                                                                                                                                                                                                                                                                                                                                                                                                                                                                                                                                                                                                                                                                                                                                                                                                                                                                                                                                                                                                                                                                                                                                                                                                                                                                                                                                                                                                                                                                                                                                                                                                                                                                                                                                                                                                                                                                                                                                                                                                                                                                                                                                                                                                                                                                                                                                                                                                                                                                                                                                               | -7.90 | 25.64 | 2.75 | P | OUT |
| QL04245 | 11-(Perfluorooctyl)undec-10-enol                                                                 | 133001-14-6  | OCCCCCCCCC(F)(F)C(F)(F)C(F)(F)C(F)(F)F                                                                                                                                                                                                                                                                                                                                                                                                                                                                                                                                                                                                                                                                                                                                                                                                                                                                                                                                                                                                                                                                                                                                                                                                                                                                                                                                                                                                                                                                                                                                                                                                                                                                                                                                                                                                                                                                                                                                                                                                                                                                                                                                                                                                                                                                                                                                                                                                                                                                                                                                                                                                                                                                                                                                                                                                                                                                                                                                                                                                                                                                                                                                                                                                                                                                                                                                                                                                                                                                                                                                                                                                                                                                                                                                                                                                                                                                                                                                                                                                                                                                                                                                                                                                                                                                                                                                                                                                                                                                                                                                                                                                                                                                                                                                                                                                                                                                                                                                                                                                                                                                                                                                                                                                                                                                                                                                                                                                                                                                                                                                                                                                                                                                                                                                                                                                                                                                                                                                                                                                                                                                                                                                                                                                                                                                                                                                                                                                                                                                                                                                                                                                                                                                | -7.68 | 23.08 | 2.73 | P | OUT |
| QL04246 | 12,12,13,13,14,14,15,15,16,16,17,17,17-Tridecafluoroheptadec-10-en-1-ol                          | 15364-19-9   | OCCCCCCCCC=CC(F)(F)C(F)(F)C(F)(F)C(F)(F)C(F)(F)C(F)(F)F                                                                                                                                                                                                                                                                                                                                                                                                                                                                                                                                                                                                                                                                                                                                                                                                                                                                                                                                                                                                                                                                                                                                                                                                                                                                                                                                                                                                                                                                                                                                                                                                                                                                                                                                                                                                                                                                                                                                                                                                                                                                                                                                                                                                                                                                                                                                                                                                                                                                                                                                                                                                                                                                                                                                                                                                                                                                                                                                                                                                                                                                                                                                                                                                                                                                                                                                                                                                                                                                                                                                                                                                                                                                                                                                                                                                                                                                                                                                                                                                                                                                                                                                                                                                                                                                                                                                                                                                                                                                                                                                                                                                                                                                                                                                                                                                                                                                                                                                                                                                                                                                                                                                                                                                                                                                                                                                                                                                                                                                                                                                                                                                                                                                                                                                                                                                                                                                                                                                                                                                                                                                                                                                                                                                                                                                                                                                                                                                                                                                                                                                                                                                                                               | -9.65 | 29.31 | 3.37 | P | OUT |
| QL04247 | 12,12,13,13,14,14,15,15,16,16,17,17,18,18,19,19-Heptadecafluorononadecan-1-ol                    | 117543-54-1  | OCCCCCCCCC=CC(F)(F)C(F)(F)C(F)(F)C(F)(F)C(F)(F)F                                                                                                                                                                                                                                                                                                                                                                                                                                                                                                                                                                                                                                                                                                                                                                                                                                                                                                                                                                                                                                                                                                                                                                                                                                                                                                                                                                                                                                                                                                                                                                                                                                                                                                                                                                                                                                                                                                                                                                                                                                                                                                                                                                                                                                                                                                                                                                                                                                                                                                                                                                                                                                                                                                                                                                                                                                                                                                                                                                                                                                                                                                                                                                                                                                                                                                                                                                                                                                                                                                                                                                                                                                                                                                                                                                                                                                                                                                                                                                                                                                                                                                                                                                                                                                                                                                                                                                                                                                                                                                                                                                                                                                                                                                                                                                                                                                                                                                                                                                                                                                                                                                                                                                                                                                                                                                                                                                                                                                                                                                                                                                                                                                                                                                                                                                                                                                                                                                                                                                                                                                                                                                                                                                                                                                                                                                                                                                                                                                                                                                                                                                                                                                                      | -8.98 | 25.00 | 3.21 | P | OUT |
| QL04249 | 12,12,13,13,14,14,15,15,16,16,17,17,17-Tridecafluoroheptadecan-1-ol                              | 1512-02-3    | OCCCCCCCCCCC(F)(F)C(F)(F)C(F)(F)C(F)(F)C(F)(F)C(F)(F)C(F)(F)F                                                                                                                                                                                                                                                                                                                                                                                                                                                                                                                                                                                                                                                                                                                                                                                                                                                                                                                                                                                                                                                                                                                                                                                                                                                                                                                                                                                                                                                                                                                                                                                                                                                                                                                                                                                                                                                                                                                                                                                                                                                                                                                                                                                                                                                                                                                                                                                                                                                                                                                                                                                                                                                                                                                                                                                                                                                                                                                                                                                                                                                                                                                                                                                                                                                                                                                                                                                                                                                                                                                                                                                                                                                                                                                                                                                                                                                                                                                                                                                                                                                                                                                                                                                                                                                                                                                                                                                                                                                                                                                                                                                                                                                                                                                                                                                                                                                                                                                                                                                                                                                                                                                                                                                                                                                                                                                                                                                                                                                                                                                                                                                                                                                                                                                                                                                                                                                                                                                                                                                                                                                                                                                                                                                                                                                                                                                                                                                                                                                                                                                                                                                                                                         | -9.59 | 28.33 | 3.37 | P | OUT |
| QL04250 | 12,12,13,13,14,14,15,15,16,16,17,17,17-Tridecafluoroheptadecan-1-ol                              | 134052-01-0  | OCCCCCCCCCCC(F)(F)C(F)(F)C(F)(F)C(F)(F)C(F)(F)C(F)(F)F                                                                                                                                                                                                                                                                                                                                                                                                                                                                                                                                                                                                                                                                                                                                                                                                                                                                                                                                                                                                                                                                                                                                                                                                                                                                                                                                                                                                                                                                                                                                                                                                                                                                                                                                                                                                                                                                                                                                                                                                                                                                                                                                                                                                                                                                                                                                                                                                                                                                                                                                                                                                                                                                                                                                                                                                                                                                                                                                                                                                                                                                                                                                                                                                                                                                                                                                                                                                                                                                                                                                                                                                                                                                                                                                                                                                                                                                                                                                                                                                                                                                                                                                                                                                                                                                                                                                                                                                                                                                                                                                                                                                                                                                                                                                                                                                                                                                                                                                                                                                                                                                                                                                                                                                                                                                                                                                                                                                                                                                                                                                                                                                                                                                                                                                                                                                                                                                                                                                                                                                                                                                                                                                                                                                                                                                                                                                                                                                                                                                                                                                                                                                                                                | -8.91 | 24.07 | 3.21 | P | OUT |
| QL04251 | 12,12,13,13,14,14,15,15,15-Nonafluoropentadecan-1-ol                                             | 36096-97-6   | OCCCCCCCCCCC(F)(F)C(F)(F)C(F)(F)C(F)(F)F                                                                                                                                                                                                                                                                                                                                                                                                                                                                                                                                                                                                                                                                                                                                                                                                                                                                                                                                                                                                                                                                                                                                                                                                                                                                                                                                                                                                                                                                                                                                                                                                                                                                                                                                                                                                                                                                                                                                                                                                                                                                                                                                                                                                                                                                                                                                                                                                                                                                                                                                                                                                                                                                                                                                                                                                                                                                                                                                                                                                                                                                                                                                                                                                                                                                                                                                                                                                                                                                                                                                                                                                                                                                                                                                                                                                                                                                                                                                                                                                                                                                                                                                                                                                                                                                                                                                                                                                                                                                                                                                                                                                                                                                                                                                                                                                                                                                                                                                                                                                                                                                                                                                                                                                                                                                                                                                                                                                                                                                                                                                                                                                                                                                                                                                                                                                                                                                                                                                                                                                                                                                                                                                                                                                                                                                                                                                                                                                                                                                                                                                                                                                                                                              | -8.15 | 18.75 | 3.04 | P | OUT |
| QL04252 | 9-[(4,4,5,5-Pentafluoropentyl)sulfanyl]nonan-1-ol                                                | 511545-94-1  | OCCCCCCCCCCC(F)(F)C(F)(F)F                                                                                                                                                                                                                                                                                                                                                                                                                                                                                                                                                                                                                                                                                                                                                                                                                                                                                                                                                                                                                                                                                                                                                                                                                                                                                                                                                                                                                                                                                                                                                                                                                                                                                                                                                                                                                                                                                                                                                                                                                                                                                                                                                                                                                                                                                                                                                                                                                                                                                                                                                                                                                                                                                                                                                                                                                                                                                                                                                                                                                                                                                                                                                                                                                                                                                                                                                                                                                                                                                                                                                                                                                                                                                                                                                                                                                                                                                                                                                                                                                                                                                                                                                                                                                                                                                                                                                                                                                                                                                                                                                                                                                                                                                                                                                                                                                                                                                                                                                                                                                                                                                                                                                                                                                                                                                                                                                                                                                                                                                                                                                                                                                                                                                                                                                                                                                                                                                                                                                                                                                                                                                                                                                                                                                                                                                                                                                                                                                                                                                                                                                                                                                                                                            | -7.65 | 10.87 | 3.06 | P | OUT |
| QL04253 | 6-(2,2,3,3,4,4,4-Heptafluorobutoxy)hexan-1-ol                                                    | 1207481-10-4 | OCCCCCOC(F)(F)C(F)(F)C(F)(F)F                                                                                                                                                                                                                                                                                                                                                                                                                                                                                                                                                                                                                                                                                                                                                                                                                                                                                                                                                                                                                                                                                                                                                                                                                                                                                                                                                                                                                                                                                                                                                                                                                                                                                                                                                                                                                                                                                                                                                                                                                                                                                                                                                                                                                                                                                                                                                                                                                                                                                                                                                                                                                                                                                                                                                                                                                                                                                                                                                                                                                                                                                                                                                                                                                                                                                                                                                                                                                                                                                                                                                                                                                                                                                                                                                                                                                                                                                                                                                                                                                                                                                                                                                                                                                                                                                                                                                                                                                                                                                                                                                                                                                                                                                                                                                                                                                                                                                                                                                                                                                                                                                                                                                                                                                                                                                                                                                                                                                                                                                                                                                                                                                                                                                                                                                                                                                                                                                                                                                                                                                                                                                                                                                                                                                                                                                                                                                                                                                                                                                                                                                                                                                                                                         | -7.36 | 20.59 | 2.67 | P | OUT |
| QL04254 | 3-[1,1,2,2,3,3,4,4,4-Nonafluorobutane-1-sulfonyl]propan-1-ol                                     | 762241-70-3  | OCCCS(=O)(=O)C(F)(F)C(F)(F)C(F)(F)F                                                                                                                                                                                                                                                                                                                                                                                                                                                                                                                                                                                                                                                                                                                                                                                                                                                                                                                                                                                                                                                                                                                                                                                                                                                                                                                                                                                                                                                                                                                                                                                                                                                                                                                                                                                                                                                                                                                                                                                                                                                                                                                                                                                                                                                                                                                                                                                                                                                                                                                                                                                                                                                                                                                                                                                                                                                                                                                                                                                                                                                                                                                                                                                                                                                                                                                                                                                                                                                                                                                                                                                                                                                                                                                                                                                                                                                                                                                                                                                                                                                                                                                                                                                                                                                                                                                                                                                                                                                                                                                                                                                                                                                                                                                                                                                                                                                                                                                                                                                                                                                                                                                                                                                                                                                                                                                                                                                                                                                                                                                                                                                                                                                                                                                                                                                                                                                                                                                                                                                                                                                                                                                                                                                                                                                                                                                                                                                                                                                                                                                                                                                                                                                                   | -7.19 | 33.33 | 2.25 | P | IN  |
| QL04255 | 3-[(Nonafluorobutyl)sulfonyl]propan-1-ol                                                         | 875628-33-4  | OCCSC(F)(F)C(F)(F)C(F)(F)C(F)(F)F                                                                                                                                                                                                                                                                                                                                                                                                                                                                                                                                                                                                                                                                                                                                                                                                                                                                                                                                                                                                                                                                                                                                                                                                                                                                                                                                                                                                                                                                                                                                                                                                                                                                                                                                                                                                                                                                                                                                                                                                                                                                                                                                                                                                                                                                                                                                                                                                                                                                                                                                                                                                                                                                                                                                                                                                                                                                                                                                                                                                                                                                                                                                                                                                                                                                                                                                                                                                                                                                                                                                                                                                                                                                                                                                                                                                                                                                                                                                                                                                                                                                                                                                                                                                                                                                                                                                                                                                                                                                                                                                                                                                                                                                                                                                                                                                                                                                                                                                                                                                                                                                                                                                                                                                                                                                                                                                                                                                                                                                                                                                                                                                                                                                                                                                                                                                                                                                                                                                                                                                                                                                                                                                                                                                                                                                                                                                                                                                                                                                                                                                                                                                                                                                     | -7.46 | 36.00 | 2.28 | P | IN  |
| QL04256 | 1-Propanol, 3-[[3,3,4,4,5,5,6,6,7,7,8,8,9,9,10,10,10-hepta-decafluorodecyl]thio]-                | 36880-07-6   | OCCSCCC(F)(F)C(F)(F)C(F)(F)C(F)(F)C(F)(F)C(F)(F)C(F)(F)F                                                                                                                                                                                                                                                                                                                                                                                                                                                                                                                                                                                                                                                                                                                                                                                                                                                                                                                                                                                                                                                                                                                                                                                                                                                                                                                                                                                                                                                                                                                                                                                                                                                                                                                                                                                                                                                                                                                                                                                                                                                                                                                                                                                                                                                                                                                                                                                                                                                                                                                                                                                                                                                                                                                                                                                                                                                                                                                                                                                                                                                                                                                                                                                                                                                                                                                                                                                                                                                                                                                                                                                                                                                                                                                                                                                                                                                                                                                                                                                                                                                                                                                                                                                                                                                                                                                                                                                                                                                                                                                                                                                                                                                                                                                                                                                                                                                                                                                                                                                                                                                                                                                                                                                                                                                                                                                                                                                                                                                                                                                                                                                                                                                                                                                                                                                                                                                                                                                                                                                                                                                                                                                                                                                                                                                                                                                                                                                                                                                                                                                                                                                                                                              | -9.32 | 39.53 | 2.95 | P | IN  |
| QL04257 | Isooctanesulfonamide, hepta-decafluoro-N,N-bis-(2-hydroxyethyl)-                                 | 93894-66-7   | OCCN(CCO)[S](=O)(=O)C(F)(F)C(F)(F)C(F)(F)C(F)(F)C(F)(F)C(F)(F)C(F)(F)F                                                                                                                                                                                                                                                                                                                                                                                                                                                                                                                                                                                                                                                                                                                                                                                                                                                                                                                                                                                                                                                                                                                                                                                                                                                                                                                                                                                                                                                                                                                                                                                                                                                                                                                                                                                                                                                                                                                                                                                                                                                                                                                                                                                                                                                                                                                                                                                                                                                                                                                                                                                                                                                                                                                                                                                                                                                                                                                                                                                                                                                                                                                                                                                                                                                                                                                                                                                                                                                                                                                                                                                                                                                                                                                                                                                                                                                                                                                                                                                                                                                                                                                                                                                                                                                                                                                                                                                                                                                                                                                                                                                                                                                                                                                                                                                                                                                                                                                                                                                                                                                                                                                                                                                                                                                                                                                                                                                                                                                                                                                                                                                                                                                                                                                                                                                                                                                                                                                                                                                                                                                                                                                                                                                                                                                                                                                                                                                                                                                                                                                                                                                                                                | -8.51 | 37.78 | 2.67 | P | IN  |
| QL04258 | 1-[Bis(2-hydroxyethylamino)-4,4,5,5,6,6,6-heptafluorohexan-2-ol                                  | 189160-58-5  | OCCN(CCO)CC(O)CC(F)(F)C(F)(F)C(F)(F)F                                                                                                                                                                                                                                                                                                                                                                                                                                                                                                                                                                                                                                                                                                                                                                                                                                                                                                                                                                                                                                                                                                                                                                                                                                                                                                                                                                                                                                                                                                                                                                                                                                                                                                                                                                                                                                                                                                                                                                                                                                                                                                                                                                                                                                                                                                                                                                                                                                                                                                                                                                                                                                                                                                                                                                                                                                                                                                                                                                                                                                                                                                                                                                                                                                                                                                                                                                                                                                                                                                                                                                                                                                                                                                                                                                                                                                                                                                                                                                                                                                                                                                                                                                                                                                                                                                                                                                                                                                                                                                                                                                                                                                                                                                                                                                                                                                                                                                                                                                                                                                                                                                                                                                                                                                                                                                                                                                                                                                                                                                                                                                                                                                                                                                                                                                                                                                                                                                                                                                                                                                                                                                                                                                                                                                                                                                                                                                                                                                                                                                                                                                                                                                                                 | -6.62 | 18.92 | 2.41 | P | OUT |
| QL04259 | 2,2'-((3,3,4,4,5,5,6,6,7,7,8,8,9,9,10,10,10-Hepta-decafluorodecyl)imino)bisethanol               | 27607-36-9   | OCCN(CCO)CCC(F)(F)C(F)(F)C(F)(F)C(F)(F)C(F)(F)C(F)(F)C(F)(F)F                                                                                                                                                                                                                                                                                                                                                                                                                                                                                                                                                                                                                                                                                                                                                                                                                                                                                                                                                                                                                                                                                                                                                                                                                                                                                                                                                                                                                                                                                                                                                                                                                                                                                                                                                                                                                                                                                                                                                                                                                                                                                                                                                                                                                                                                                                                                                                                                                                                                                                                                                                                                                                                                                                                                                                                                                                                                                                                                                                                                                                                                                                                                                                                                                                                                                                                                                                                                                                                                                                                                                                                                                                                                                                                                                                                                                                                                                                                                                                                                                                                                                                                                                                                                                                                                                                                                                                                                                                                                                                                                                                                                                                                                                                                                                                                                                                                                                                                                                                                                                                                                                                                                                                                                                                                                                                                                                                                                                                                                                                                                                                                                                                                                                                                                                                                                                                                                                                                                                                                                                                                                                                                                                                                                                                                                                                                                                                                                                                                                                                                                                                                                                                         | -8.92 | 35.42 | 2.90 | P | IN  |
| QL04260 | N-(Bis(2-hydroxyethylamino)propyl)-perfluorooctanamide                                           | 41358-63-8   | OCCN(CCO)CCNC(=O)C(F)(F)C(F)(F)C(F)(F)C(F)(F)C(F)(F)C(F)(F)F                                                                                                                                                                                                                                                                                                                                                                                                                                                                                                                                                                                                                                                                                                                                                                                                                                                                                                                                                                                                                                                                                                                                                                                                                                                                                                                                                                                                                                                                                                                                                                                                                                                                                                                                                                                                                                                                                                                                                                                                                                                                                                                                                                                                                                                                                                                                                                                                                                                                                                                                                                                                                                                                                                                                                                                                                                                                                                                                                                                                                                                                                                                                                                                                                                                                                                                                                                                                                                                                                                                                                                                                                                                                                                                                                                                                                                                                                                                                                                                                                                                                                                                                                                                                                                                                                                                                                                                                                                                                                                                                                                                                                                                                                                                                                                                                                                                                                                                                                                                                                                                                                                                                                                                                                                                                                                                                                                                                                                                                                                                                                                                                                                                                                                                                                                                                                                                                                                                                                                                                                                                                                                                                                                                                                                                                                                                                                                                                                                                                                                                                                                                                                                          | -8.92 | 28.85 | 3.08 | P | OUT |
| QL04261 | 1,1-Bis((perfluoro-1-nonyl)ethyloxy)-N-(2-hydroxyethyl)-2-oxa-3-aza-1-phosphapentan-5-ol 1-oxide | 101896-22-4  | OCCN(CCO)O[P](=O)(=O)OCCC(F)(F)C(F)(F)C(F)(F)C(F)(F)C(F)(F)C(F)(F)C(F)(F)C(F)(F)C(F)(F)C(F)(F)C(F)(F)C(F)(F)C(F)(F)C(F)(F)C(F)(F)C(F)(F)C(F)(F)C(F)(F)C(F)(F)C(F)(F)C(F)(F)C(F)(F)C(F)(F)C(F)(F)C(F)(F)C(F)(F)C(F)(F)C(F)(F)C(F)(F)C(F)(F)C(F)(F)C(F)(F)C(F)(F)C(F)(F)C(F)(F)C(F)(F)C(F)(F)C(F)(F)C(F)(F)C(F)(F)C(F)(F)C(F)(F)C(F)(F)C(F)(F)C(F)(F)C(F)(F)C(F)(F)C(F)(F)C(F)(F)C(F)(F)C(F)(F)C(F)(F)C(F)(F)C(F)(F)C(F)(F)C(F)(F)C(F)(F)C(F)(F)C(F)(F)C(F)(F)C(F)(F)C(F)(F)C(F)(F)C(F)(F)C(F)(F)C(F)(F)C(F)(F)C(F)(F)C(F)(F)C(F)(F)C(F)(F)C(F)(F)C(F)(F)C(F)(F)C(F)(F)C(F)(F)C(F)(F)C(F)(F)C(F)(F)C(F)(F)C(F)(F)C(F)(F)C(F)(F)C(F)(F)C(F)(F)C(F)(F)C(F)(F)C(F)(F)C(F)(F)C(F)(F)C(F)(F)C(F)(F)C(F)(F)C(F)(F)C(F)(F)C(F)(F)C(F)(F)C(F)(F)C(F)(F)C(F)(F)C(F)(F)C(F)(F)C(F)(F)C(F)(F)C(F)(F)C(F)(F)C(F)(F)C(F)(F)C(F)(F)C(F)(F)C(F)(F)C(F)(F)C(F)(F)C(F)(F)C(F)(F)C(F)(F)C(F)(F)C(F)(F)C(F)(F)C(F)(F)C(F)(F)C(F)(F)C(F)(F)C(F)(F)C(F)(F)C(F)(F)C(F)(F)C(F)(F)C(F)(F)C(F)(F)C(F)(F)C(F)(F)C(F)(F)C(F)(F)C(F)(F)C(F)(F)C(F)(F)C(F)(F)C(F)(F)C(F)(F)C(F)(F)C(F)(F)C(F)(F)C(F)(F)C(F)(F)C(F)(F)C(F)(F)C(F)(F)C(F)(F)C(F)(F)C(F)(F)C(F)(F)C(F)(F)C(F)(F)C(F)(F)C(F)(F)C(F)(F)C(F)(F)C(F)(F)C(F)(F)C(F)(F)C(F)(F)C(F)(F)C(F)(F)C(F)(F)C(F)(F)C(F)(F)C(F)(F)C(F)(F)C(F)(F)C(F)(F)C(F)(F)C(F)(F)C(F)(F)C(F)(F)C(F)(F)C(F)(F)C(F)(F)C(F)(F)C(F)(F)C(F)(F)C(F)(F)C(F)(F)C(F)(F)C(F)(F)C(F)(F)C(F)(F)C(F)(F)C(F)(F)C(F)(F)C(F)(F)C(F)(F)C(F)(F)C(F)(F)C(F)(F)C(F)(F)C(F)(F)C(F)(F)C(F)(F)C(F)(F)C(F)(F)C(F)(F)C(F)(F)C(F)(F)C(F)(F)C(F)(F)C(F)(F)C(F)(F)C(F)(F)C(F)(F)C(F)(F)C(F)(F)C(F)(F)C(F)(F)C(F)(F)C(F)(F)C(F)(F)C(F)(F)C(F)(F)C(F)(F)C(F)(F)C(F)(F)C(F)(F)C(F)(F)C(F)(F)C(F)(F)C(F)(F)C(F)(F)C(F)(F)C(F)(F)C(F)(F)C(F)(F)C(F)(F)C(F)(F)C(F)(F)C(F)(F)C(F)(F)C(F)(F)C(F)(F)C(F)(F)C(F)(F)C(F)(F)C(F)(F)C(F)(F)C(F)(F)C(F)(F)C(F)(F)C(F)(F)C(F)(F)C(F)(F)C(F)(F)C(F)(F)C(F)(F)C(F)(F)C(F)(F)C(F)(F)C(F)(F)C(F)(F)C(F)(F)C(F)(F)C(F)(F)C(F)(F)C(F)(F)C(F)(F)C(F)(F)C(F)(F)C(F)(F)C(F)(F)C(F)(F)C(F)(F)C(F)(F)C(F)(F)C(F)(F)C(F)(F)C(F)(F)C(F)(F)C(F)(F)C(F)(F)C(F)(F)C(F)(F)C(F)(F)C(F)(F)C(F)(F)C(F)(F)C(F)(F)C(F)(F)C(F)(F)C(F)(F)C(F)(F)C(F)(F)C(F)(F)C(F)(F)C(F)(F)C(F)(F)C(F)(F)C(F)(F)C(F)(F)C(F)(F)C(F)(F)C(F)(F)C(F)(F)C(F)(F)C(F)(F)C(F)(F)C(F)(F)C(F)(F)C(F)(F)C(F)(F)C(F)(F)C(F)(F)C(F)(F)C(F)(F)C(F)(F)C(F)(F)C(F)(F)C(F)(F)C(F)(F)C(F)(F)C(F)(F)C(F)(F)C(F)(F)C(F)(F)C(F)(F)C(F)(F)C(F)(F)C(F)(F)C(F)(F)C(F)(F)C(F)(F)C(F)(F)C(F)(F)C(F)(F)C(F)(F)C(F)(F)C(F)(F)C(F)(F)C(F)(F)C(F)(F)C(F)(F)C(F)(F)C(F)(F)C(F)(F)C(F)(F)C(F)(F)C(F)(F)C(F)(F)C(F)(F)C(F)(F)C(F)(F)C(F)(F)C(F)(F)C(F)(F)C(F)(F)C(F)(F)C(F)(F)C(F)(F)C(F)(F)C(F)(F)C(F)(F)C(F)(F)C(F)(F)C(F)(F)C(F)(F)C(F)(F)C(F)(F)C(F)(F)C(F)(F)C(F)(F)C(F)(F)C(F)(F)C(F)(F)C(F)(F)C(F)(F)C(F)(F)C(F)(F)C(F)(F)C(F)(F)C(F)(F)C(F)(F)C(F)(F)C(F)(F)C(F)(F)C(F)(F)C(F)(F)C(F)(F)C(F)(F)C(F)(F)C(F)(F)C(F)(F)C(F)(F)C(F)(F)C(F)(F)C(F)(F)C(F)(F)C(F)(F)C(F)(F)C(F)(F)C(F)(F)C(F)(F)C(F)(F)C(F)(F)C(F)(F)C(F)(F)C(F)(F)C(F)(F)C(F)(F)C(F)(F)C(F)(F)C(F)(F)C(F)(F)C(F)(F)C(F)(F)C(F)(F)C(F)(F)C(F)(F)C(F)(F)C(F)(F)C(F)(F)C(F)(F)C(F)(F)C(F)(F)C(F)(F)C(F)(F)C(F)(F)C(F)(F)C(F)(F)C(F)(F)C(F)(F)C(F)(F)C(F)(F)C(F)(F)C(F)(F)C(F)(F)C(F)(F)C(F)(F)C(F)(F)C(F)(F)C(F)(F)C(F)(F)C(F)(F)C(F)(F)C(F)(F)C(F)(F)C(F)(F)C(F)(F)C(F)(F)C(F)(F)C(F)(F)C(F)(F)C(F)(F)C(F)(F)C(F)(F)C(F)(F)C(F)(F)C(F)(F)C(F)(F)C(F)(F)C(F)(F)C(F)(F)C(F)(F)C(F)(F)C(F)(F)C(F)(F)C(F)(F)C(F)(F)C(F)(F)C(F)(F)C(F)(F)C(F)(F)C(F)(F)C(F)(F)C(F)(F)C(F)(F)C(F)(F)C(F)(F)C(F)(F)C(F)(F)C(F)(F)C(F)(F)C(F)(F)C(F)(F)C(F)(F)C(F)(F)C(F)(F)C(F)(F)C(F)(F)C(F)(F)C(F)(F)C(F)(F)C(F)(F)C(F)(F)C(F)(F)C(F)(F)C(F)(F)C(F)(F)C(F)(F)C(F)(F)C(F)(F)C(F)(F)C(F)(F)C(F)(F)C(F)(F)C(F)(F)C(F)(F)C(F)(F)C(F)(F)C(F)(F)C(F)(F)C(F)(F)C(F)(F)C(F)(F)C(F)(F)C(F)(F)C(F)(F)C(F)(F)C(F)(F)C(F)(F)C(F)(F)C(F)(F)C(F)(F)C(F)(F)C(F)(F)C(F)(F)C(F)(F)C(F)(F)C(F)(F)C(F)(F)C(F)(F)C(F)(F)C(F)(F)C(F)(F)C(F)(F)C(F)(F)C(F)(F)C(F)(F)C(F)(F)C(F)(F)C(F)(F)C(F)(F)C(F)(F)C(F)(F)C(F)(F)C(F)(F)C(F)(F)C(F)(F)C(F)(F)C(F)(F)C(F)(F)C(F)(F)C(F)(F)C(F)(F)C(F)(F)C(F)(F)C(F)(F)C(F)(F)C(F)(F)C(F)(F)C(F)(F)C(F)(F)C(F)(F)C(F)(F)C(F)(F)C(F)(F)C(F)(F)C(F)(F)C(F)(F)C(F)(F)C(F)(F)C(F)(F)C(F)(F)C(F)(F)C(F)(F)C(F)(F)C(F)(F)C(F)(F)C(F)(F)C(F)(F)C(F)(F)C(F)(F)C(F)(F)C(F)(F)C(F)(F)C(F)(F)C(F)(F)C(F)(F)C(F)(F)C(F)(F)C(F)(F)C(F)(F)C(F)(F)C(F)(F)C(F)(F)C(F)(F)C(F)(F)C(F)(F)C(F)(F)C(F)(F)C(F)(F)C(F)(F)C(F)(F)C(F)(F)C(F)(F)C(F)(F)C(F)(F)C(F)(F)C(F)(F)C(F)(F)C(F)(F)C(F)(F)C(F)(F)C(F)(F)C(F)(F)C(F)(F)C(F)(F)C(F)(F)C(F)(F)C(F)(F)C(F)(F)C(F)(F)C(F)(F)C(F)(F)C(F)(F)C(F)(F)C(F)(F)C(F)(F)C(F)(F)C(F)(F)C(F)(F)C(F)(F)C(F)(F)C(F)(F)C(F)(F)C(F)(F)C(F)(F)C(F)(F)C(F)(F)C(F)(F)C(F)(F)C(F)(F)C(F)(F)C(F)(F)C(F)(F)C(F)(F)C(F)(F)C(F)(F)C(F)(F)C(F)(F)C(F)(F)C(F)(F)C(F)(F)C(F)(F)C(F)(F)C(F)(F)C(F)(F)C(F)(F)C(F)(F)C(F)(F)C(F)(F)C(F)(F)C(F)(F)C(F)(F)C(F)(F)C(F)(F)C(F)(F)C(F)(F)C(F)(F)C(F)(F)C(F)(F)C(F)(F)C(F)(F)C(F)(F)C(F)(F)C(F)(F)C(F)(F)C(F)(F)C(F)(F)C(F)(F)C(F)(F)C(F)(F)C(F)(F)C(F)(F)C(F)(F)C(F)(F)C(F)(F)C(F)(F)C(F)(F)C(F)(F)C(F)(F)C(F)(F)C(F)(F)C(F)(F)C(F)(F)C(F)(F)C(F)(F)C(F)(F)C(F)(F)C(F)(F)C(F)(F)C(F)(F)C(F)(F)C(F)(F)C(F)(F)C(F)(F)C(F)(F)C(F)(F)C(F)(F)C(F)(F)C(F)(F)C(F)(F)C(F)(F)C(F)(F)C(F)(F)C(F)(F)C(F)(F)C(F)(F)C(F)(F)C(F)(F)C(F)(F)C(F)(F)C(F)(F)C(F)(F)C(F)(F)C(F)(F)C(F)(F)C(F)(F)C(F)(F)C(F)(F)C(F)(F)C(F)(F)C(F)(F)C(F)(F)C(F)(F)C(F)(F)C(F)(F)C(F)(F)C(F)(F)C(F)(F)C(F)(F)C(F)(F)C(F)(F)C(F)(F)C(F)(F)C(F)(F)C(F)(F)C(F)(F)C(F)(F)C(F)(F)C(F)(F)C(F)(F)C(F)(F)C(F)(F)C(F)(F)C(F)(F)C(F)(F)C(F)(F)C(F)(F)C(F)(F)C(F)(F)C(F)(F)C(F)(F)C(F)(F)C(F)(F)C(F)(F)C(F)(F)C(F)(F)C(F)(F)C(F)(F)C(F)(F)C(F)(F)C(F)(F)C(F)(F)C(F)(F)C(F)(F)C(F)(F)C(F)(F)C(F)(F)C(F)(F)C(F)(F)C(F)(F)C(F)(F)C(F)(F)C(F)(F)C(F)(F)C(F)(F)C(F)(F)C(F)(F)C(F)(F)C(F)(F)C(F)(F)C(F)(F)C(F)(F)C(F)(F)C(F)(F)C(F)(F)C(F)(F)C(F)(F)C(F)(F)C(F)(F)C(F)(F)C(F)(F)C(F)(F)C(F)(F)C(F)(F)C(F)(F)C(F)(F)C(F)(F)C(F)(F)C(F)(F)C(F)(F)C(F)(F)C(F)(F)C(F)(F)C(F)(F)C(F)(F)C(F)(F)C(F)(F)C(F)(F)C(F)(F)C(F)(F)C(F)(F)C(F)(F)C(F)(F)C(F)(F)C(F)(F)C(F)(F)C(F)(F)C(F)(F)C(F)(F)C(F)(F)C(F)(F)C(F)(F)C(F)(F)C(F)(F)C(F)(F)C(F)(F)C(F)(F)C(F)(F)C(F)(F)C(F)(F)C(F)(F)C(F)(F)C(F)(F)C(F)(F)C(F)(F)C(F)(F)C(F)(F)C(F)(F)C(F)(F)C(F)(F)C(F)(F)C(F)(F)C(F)(F)C(F)(F)C(F)(F)C(F)(F)C(F)(F)C(F)(F)C(F)(F)C(F)(F)C(F)(F)C(F)(F)C(F)(F)C(F)(F)C(F)(F)C(F)(F)C(F)(F)C(F)(F)C(F)(F)C(F)(F)C(F)(F)C(F)(F)C(F)(F)C(F)(F)C(F)(F)C(F)(F)C(F)(F)C(F)(F)C(F)(F)C(F)(F)C(F)(F)C(F)(F)C(F)(F)C(F)(F)C(F)(F)C(F)(F)C(F)(F)C(F)(F)C(F)(F)C(F)(F)C(F)(F)C(F)(F)C(F)(F)C(F)(F)C(F)(F)C(F)(F)C(F)(F)C(F)(F)C(F)(F)C(F)(F)C(F)(F)C(F)(F)C(F)(F)C(F)(F)C(F)(F)C(F)(F)C(F)(F)C(F)(F)C(F)(F)C(F)(F)C(F)(F)C(F)(F)C(F)(F)C(F)(F)C(F)(F)C(F)(F)C(F)(F)C |       |       |      |   |     |



[illegible]



[illegible]



[illegible]



|         |                                                                             |                                                                                                                                                                                                                                                                                                                                                                                                                                                                                                                                                                                                                                                                                                                                                                                                                                                                                                                                                                                                                                                                                                                                                                                                                                                                                                                                                                                                                                                                                                                                                                                                                                                                                                                                                                                                                                                                                                                                                                                                                                                                                                                                                                                                                                                                                                                                                                                                                                                                                                                                                                                                                                                                                                                                                                                                                                                                                                                                                                                                                                                                                                                                                                                                                                                                                                                                                                                                                                                                                                                                                                                                                                                                                                                                                                                                                                                                                                                                                                                                                                                                                                                                                                                                                                                                                                                                                                                                                                                                                                                                                                                                                                                                                                                                                                                                                                                                                                                                                                                                                                                                                                                                                                                                                                                                                                                                                                                                                                                                                                                                                                                                                                                                                                                                                                                                                                                                                                                                                                                                                                                                                                                                                                                                                                                                                                                                                                                                                                                                                                                                                                                                                                                                                                                                                                                                                                                                                                                                                                                                                                                                                                                                                                                                                                                                                                                                                                                                                                                                                                                                                                                                                                                                                                                                                                                                                                                                                                                                                                                                                                                                                                                                                                                                                                                                                                                                                                                                                                                                                                                                                                                                                                                                                                                                                                                                                                                                                                                                                                                                                                                                                                                                                                                                                                                                                                                                                                                                                                                                                                                                                                                                                                                                                                                                                                                                                                                                                                                                                                                                                                                                                                                                                                                                                                                                                                                                                                                                                                                                                                                                                                                                                                                                                                                                                                                                                                                                                                                                                                                                                                                                                                                                                                                                                                                                                                                                                                                                                                                                                                                                                                                                                                                                                                                                                                                                                                                                                                                                                                                                                 |       |       |      |   |    |
|---------|-----------------------------------------------------------------------------|-----------------------------------------------------------------------------------------------------------------------------------------------------------------------------------------------------------------------------------------------------------------------------------------------------------------------------------------------------------------------------------------------------------------------------------------------------------------------------------------------------------------------------------------------------------------------------------------------------------------------------------------------------------------------------------------------------------------------------------------------------------------------------------------------------------------------------------------------------------------------------------------------------------------------------------------------------------------------------------------------------------------------------------------------------------------------------------------------------------------------------------------------------------------------------------------------------------------------------------------------------------------------------------------------------------------------------------------------------------------------------------------------------------------------------------------------------------------------------------------------------------------------------------------------------------------------------------------------------------------------------------------------------------------------------------------------------------------------------------------------------------------------------------------------------------------------------------------------------------------------------------------------------------------------------------------------------------------------------------------------------------------------------------------------------------------------------------------------------------------------------------------------------------------------------------------------------------------------------------------------------------------------------------------------------------------------------------------------------------------------------------------------------------------------------------------------------------------------------------------------------------------------------------------------------------------------------------------------------------------------------------------------------------------------------------------------------------------------------------------------------------------------------------------------------------------------------------------------------------------------------------------------------------------------------------------------------------------------------------------------------------------------------------------------------------------------------------------------------------------------------------------------------------------------------------------------------------------------------------------------------------------------------------------------------------------------------------------------------------------------------------------------------------------------------------------------------------------------------------------------------------------------------------------------------------------------------------------------------------------------------------------------------------------------------------------------------------------------------------------------------------------------------------------------------------------------------------------------------------------------------------------------------------------------------------------------------------------------------------------------------------------------------------------------------------------------------------------------------------------------------------------------------------------------------------------------------------------------------------------------------------------------------------------------------------------------------------------------------------------------------------------------------------------------------------------------------------------------------------------------------------------------------------------------------------------------------------------------------------------------------------------------------------------------------------------------------------------------------------------------------------------------------------------------------------------------------------------------------------------------------------------------------------------------------------------------------------------------------------------------------------------------------------------------------------------------------------------------------------------------------------------------------------------------------------------------------------------------------------------------------------------------------------------------------------------------------------------------------------------------------------------------------------------------------------------------------------------------------------------------------------------------------------------------------------------------------------------------------------------------------------------------------------------------------------------------------------------------------------------------------------------------------------------------------------------------------------------------------------------------------------------------------------------------------------------------------------------------------------------------------------------------------------------------------------------------------------------------------------------------------------------------------------------------------------------------------------------------------------------------------------------------------------------------------------------------------------------------------------------------------------------------------------------------------------------------------------------------------------------------------------------------------------------------------------------------------------------------------------------------------------------------------------------------------------------------------------------------------------------------------------------------------------------------------------------------------------------------------------------------------------------------------------------------------------------------------------------------------------------------------------------------------------------------------------------------------------------------------------------------------------------------------------------------------------------------------------------------------------------------------------------------------------------------------------------------------------------------------------------------------------------------------------------------------------------------------------------------------------------------------------------------------------------------------------------------------------------------------------------------------------------------------------------------------------------------------------------------------------------------------------------------------------------------------------------------------------------------------------------------------------------------------------------------------------------------------------------------------------------------------------------------------------------------------------------------------------------------------------------------------------------------------------------------------------------------------------------------------------------------------------------------------------------------------------------------------------------------------------------------------------------------------------------------------------------------------------------------------------------------------------------------------------------------------------------------------------------------------------------------------------------------------------------------------------------------------------------------------------------------------------------------------------------------------------------------------------------------------------------------------------------------------------------------------------------------------------------------------------------------------------------------------------------------------------------------------------------------------------------------------------------------------------------------------------------------------------------------------------------------------------------------------------------------------------------------------------------------------------------------------------------------------------------------------------------------------------------------------------------------------------------------------------------------------------------------------------------------------------------------------------------------------------------------------------------------------------------------------------------------------------------------------------------------------------------------------------------------------------------------------------------------------------------------------------------------------------------------------------------------------------------------------------------------------------------------------------------------------------------------------------------------------------------------------------------------------------------------------------------------------------------------------------------------------------------------------------------------------------------------------------------------------------------------------------------------------------------------------------------------------------------------------------------------------------------------------------------------------------------------------------------------------------------------------------------------------------------------------------------------------------------------------------------------------------------------------------------------------------------------------------------------------------------------------------------------------------------------------------------------------------------------------------------------------------------------------------------------------------------------------------------------------------------------------------------------------------------------------------------------------------------------------------------------------------------------------------------------------------------------------------------------------------------------------------------------------------------------------------------------------------------------------------------------------------------------------------------------------------------------------------------------------------------------------------------------------------------------------------------------------------------------------------------------------------------------------------------------------------------------------------------------------------------------------------------------------------------------------------------------------------------|-------|-------|------|---|----|
| QL04384 | ether-substituted Perfluoroalkyl (linear) sulfonic acids_i, n=3             | S(=O)(O)(=O)C(F)(F)C(F)(F)C(F)(F)OC(F)(F)C(C(F)(F)F)C(F)(F)F                                                                                                                                                                                                                                                                                                                                                                                                                                                                                                                                                                                                                                                                                                                                                                                                                                                                                                                                                                                                                                                                                                                                                                                                                                                                                                                                                                                                                                                                                                                                                                                                                                                                                                                                                                                                                                                                                                                                                                                                                                                                                                                                                                                                                                                                                                                                                                                                                                                                                                                                                                                                                                                                                                                                                                                                                                                                                                                                                                                                                                                                                                                                                                                                                                                                                                                                                                                                                                                                                                                                                                                                                                                                                                                                                                                                                                                                                                                                                                                                                                                                                                                                                                                                                                                                                                                                                                                                                                                                                                                                                                                                                                                                                                                                                                                                                                                                                                                                                                                                                                                                                                                                                                                                                                                                                                                                                                                                                                                                                                                                                                                                                                                                                                                                                                                                                                                                                                                                                                                                                                                                                                                                                                                                                                                                                                                                                                                                                                                                                                                                                                                                                                                                                                                                                                                                                                                                                                                                                                                                                                                                                                                                                                                                                                                                                                                                                                                                                                                                                                                                                                                                                                                                                                                                                                                                                                                                                                                                                                                                                                                                                                                                                                                                                                                                                                                                                                                                                                                                                                                                                                                                                                                                                                                                                                                                                                                                                                                                                                                                                                                                                                                                                                                                                                                                                                                                                                                                                                                                                                                                                                                                                                                                                                                                                                                                                                                                                                                                                                                                                                                                                                                                                                                                                                                                                                                                                                                                                                                                                                                                                                                                                                                                                                                                                                                                                                                                                                                                                                                                                                                                                                                                                                                                                                                                                                                                                                                                                                                                                                                                                                                                                                                                                                                                                                                                                                                                                                                                                    | -8.39 | 53.57 | 2.18 | P | IN |
| QL04385 | ether-substituted Perfluoroalkyl (linear) sulfonic acids_n=3                | S(=O)(O)(=O)C(F)(F)C(F)(F)C(F)(F)OC(F)(F)F                                                                                                                                                                                                                                                                                                                                                                                                                                                                                                                                                                                                                                                                                                                                                                                                                                                                                                                                                                                                                                                                                                                                                                                                                                                                                                                                                                                                                                                                                                                                                                                                                                                                                                                                                                                                                                                                                                                                                                                                                                                                                                                                                                                                                                                                                                                                                                                                                                                                                                                                                                                                                                                                                                                                                                                                                                                                                                                                                                                                                                                                                                                                                                                                                                                                                                                                                                                                                                                                                                                                                                                                                                                                                                                                                                                                                                                                                                                                                                                                                                                                                                                                                                                                                                                                                                                                                                                                                                                                                                                                                                                                                                                                                                                                                                                                                                                                                                                                                                                                                                                                                                                                                                                                                                                                                                                                                                                                                                                                                                                                                                                                                                                                                                                                                                                                                                                                                                                                                                                                                                                                                                                                                                                                                                                                                                                                                                                                                                                                                                                                                                                                                                                                                                                                                                                                                                                                                                                                                                                                                                                                                                                                                                                                                                                                                                                                                                                                                                                                                                                                                                                                                                                                                                                                                                                                                                                                                                                                                                                                                                                                                                                                                                                                                                                                                                                                                                                                                                                                                                                                                                                                                                                                                                                                                                                                                                                                                                                                                                                                                                                                                                                                                                                                                                                                                                                                                                                                                                                                                                                                                                                                                                                                                                                                                                                                                                                                                                                                                                                                                                                                                                                                                                                                                                                                                                                                                                                                                                                                                                                                                                                                                                                                                                                                                                                                                                                                                                                                                                                                                                                                                                                                                                                                                                                                                                                                                                                                                                                                                                                                                                                                                                                                                                                                                                                                                                                                                                                                                                      | -7.27 | 47.37 | 1.89 | P | IN |
| QL04386 | ether-substituted Perfluoroalkyl (linear) sulfonic acids_i, n=2             | S(=O)(O)(=O)C(F)(F)C(F)(F)OC(F)(F)C(F)(F)F                                                                                                                                                                                                                                                                                                                                                                                                                                                                                                                                                                                                                                                                                                                                                                                                                                                                                                                                                                                                                                                                                                                                                                                                                                                                                                                                                                                                                                                                                                                                                                                                                                                                                                                                                                                                                                                                                                                                                                                                                                                                                                                                                                                                                                                                                                                                                                                                                                                                                                                                                                                                                                                                                                                                                                                                                                                                                                                                                                                                                                                                                                                                                                                                                                                                                                                                                                                                                                                                                                                                                                                                                                                                                                                                                                                                                                                                                                                                                                                                                                                                                                                                                                                                                                                                                                                                                                                                                                                                                                                                                                                                                                                                                                                                                                                                                                                                                                                                                                                                                                                                                                                                                                                                                                                                                                                                                                                                                                                                                                                                                                                                                                                                                                                                                                                                                                                                                                                                                                                                                                                                                                                                                                                                                                                                                                                                                                                                                                                                                                                                                                                                                                                                                                                                                                                                                                                                                                                                                                                                                                                                                                                                                                                                                                                                                                                                                                                                                                                                                                                                                                                                                                                                                                                                                                                                                                                                                                                                                                                                                                                                                                                                                                                                                                                                                                                                                                                                                                                                                                                                                                                                                                                                                                                                                                                                                                                                                                                                                                                                                                                                                                                                                                                                                                                                                                                                                                                                                                                                                                                                                                                                                                                                                                                                                                                                                                                                                                                                                                                                                                                                                                                                                                                                                                                                                                                                                                                                                                                                                                                                                                                                                                                                                                                                                                                                                                                                                                                                                                                                                                                                                                                                                                                                                                                                                                                                                                                                                                                                                                                                                                                                                                                                                                                                                                                                                                                                                                                                                                      | -7.90 | 52.00 | 2.02 | P | IN |
| QL04387 | Cl-substituted,ether-substituted perfluoroalkyl (linear)sulfonic acids_n=12 | S(=O)(O)(=O)C(F)(F)C(F)(F)OC(F)(F)C(F)(F)C(F)(F)C(F)(F)C(F)(F)C(F)(F)C(F)(F)C(F)(F)C(F)(F)C(F)(F)C(F)(F)C(F)(F)C(F)(F)C(F)(F)C(F)(F)C(F)(F)C(F)(F)C(F)(F)C(F)(F)C(F)(F)C(F)(F)C(F)(F)C(F)(F)C(F)(F)C(F)(F)C(F)(F)C(F)(F)C(F)(F)C(F)(F)C(F)(F)C(F)(F)C(F)(F)C(F)(F)C(F)(F)C(F)(F)C(F)(F)C(F)(F)C(F)(F)C(F)(F)C(F)(F)C(F)(F)C(F)(F)C(F)(F)C(F)(F)C(F)(F)C(F)(F)C(F)(F)C(F)(F)C(F)(F)C(F)(F)C(F)(F)C(F)(F)C(F)(F)C(F)(F)C(F)(F)C(F)(F)C(F)(F)C(F)(F)C(F)(F)C(F)(F)C(F)(F)C(F)(F)C(F)(F)C(F)(F)C(F)(F)C(F)(F)C(F)(F)C(F)(F)C(F)(F)C(F)(F)C(F)(F)C(F)(F)C(F)(F)C(F)(F)C(F)(F)C(F)(F)C(F)(F)C(F)(F)C(F)(F)C(F)(F)C(F)(F)C(F)(F)C(F)(F)C(F)(F)C(F)(F)C(F)(F)C(F)(F)C(F)(F)C(F)(F)C(F)(F)C(F)(F)C(F)(F)C(F)(F)C(F)(F)C(F)(F)C(F)(F)C(F)(F)C(F)(F)C(F)(F)C(F)(F)C(F)(F)C(F)(F)C(F)(F)C(F)(F)C(F)(F)C(F)(F)C(F)(F)C(F)(F)C(F)(F)C(F)(F)C(F)(F)C(F)(F)C(F)(F)C(F)(F)C(F)(F)C(F)(F)C(F)(F)C(F)(F)C(F)(F)C(F)(F)C(F)(F)C(F)(F)C(F)(F)C(F)(F)C(F)(F)C(F)(F)C(F)(F)C(F)(F)C(F)(F)C(F)(F)C(F)(F)C(F)(F)C(F)(F)C(F)(F)C(F)(F)C(F)(F)C(F)(F)C(F)(F)C(F)(F)C(F)(F)C(F)(F)C(F)(F)C(F)(F)C(F)(F)C(F)(F)C(F)(F)C(F)(F)C(F)(F)C(F)(F)C(F)(F)C(F)(F)C(F)(F)C(F)(F)C(F)(F)C(F)(F)C(F)(F)C(F)(F)C(F)(F)C(F)(F)C(F)(F)C(F)(F)C(F)(F)C(F)(F)C(F)(F)C(F)(F)C(F)(F)C(F)(F)C(F)(F)C(F)(F)C(F)(F)C(F)(F)C(F)(F)C(F)(F)C(F)(F)C(F)(F)C(F)(F)C(F)(F)C(F)(F)C(F)(F)C(F)(F)C(F)(F)C(F)(F)C(F)(F)C(F)(F)C(F)(F)C(F)(F)C(F)(F)C(F)(F)C(F)(F)C(F)(F)C(F)(F)C(F)(F)C(F)(F)C(F)(F)C(F)(F)C(F)(F)C(F)(F)C(F)(F)C(F)(F)C(F)(F)C(F)(F)C(F)(F)C(F)(F)C(F)(F)C(F)(F)C(F)(F)C(F)(F)C(F)(F)C(F)(F)C(F)(F)C(F)(F)C(F)(F)C(F)(F)C(F)(F)C(F)(F)C(F)(F)C(F)(F)C(F)(F)C(F)(F)C(F)(F)C(F)(F)C(F)(F)C(F)(F)C(F)(F)C(F)(F)C(F)(F)C(F)(F)C(F)(F)C(F)(F)C(F)(F)C(F)(F)C(F)(F)C(F)(F)C(F)(F)C(F)(F)C(F)(F)C(F)(F)C(F)(F)C(F)(F)C(F)(F)C(F)(F)C(F)(F)C(F)(F)C(F)(F)C(F)(F)C(F)(F)C(F)(F)C(F)(F)C(F)(F)C(F)(F)C(F)(F)C(F)(F)C(F)(F)C(F)(F)C(F)(F)C(F)(F)C(F)(F)C(F)(F)C(F)(F)C(F)(F)C(F)(F)C(F)(F)C(F)(F)C(F)(F)C(F)(F)C(F)(F)C(F)(F)C(F)(F)C(F)(F)C(F)(F)C(F)(F)C(F)(F)C(F)(F)C(F)(F)C(F)(F)C(F)(F)C(F)(F)C(F)(F)C(F)(F)C(F)(F)C(F)(F)C(F)(F)C(F)(F)C(F)(F)C(F)(F)C(F)(F)C(F)(F)C(F)(F)C(F)(F)C(F)(F)C(F)(F)C(F)(F)C(F)(F)C(F)(F)C(F)(F)C(F)(F)C(F)(F)C(F)(F)C(F)(F)C(F)(F)C(F)(F)C(F)(F)C(F)(F)C(F)(F)C(F)(F)C(F)(F)C(F)(F)C(F)(F)C(F)(F)C(F)(F)C(F)(F)C(F)(F)C(F)(F)C(F)(F)C(F)(F)C(F)(F)C(F)(F)C(F)(F)C(F)(F)C(F)(F)C(F)(F)C(F)(F)C(F)(F)C(F)(F)C(F)(F)C(F)(F)C(F)(F)C(F)(F)C(F)(F)C(F)(F)C(F)(F)C(F)(F)C(F)(F)C(F)(F)C(F)(F)C(F)(F)C(F)(F)C(F)(F)C(F)(F)C(F)(F)C(F)(F)C(F)(F)C(F)(F)C(F)(F)C(F)(F)C(F)(F)C(F)(F)C(F)(F)C(F)(F)C(F)(F)C(F)(F)C(F)(F)C(F)(F)C(F)(F)C(F)(F)C(F)(F)C(F)(F)C(F)(F)C(F)(F)C(F)(F)C(F)(F)C(F)(F)C(F)(F)C(F)(F)C(F)(F)C(F)(F)C(F)(F)C(F)(F)C(F)(F)C(F)(F)C(F)(F)C(F)(F)C(F)(F)C(F)(F)C(F)(F)C(F)(F)C(F)(F)C(F)(F)C(F)(F)C(F)(F)C(F)(F)C(F)(F)C(F)(F)C(F)(F)C(F)(F)C(F)(F)C(F)(F)C(F)(F)C(F)(F)C(F)(F)C(F)(F)C(F)(F)C(F)(F)C(F)(F)C(F)(F)C(F)(F)C(F)(F)C(F)(F)C(F)(F)C(F)(F)C(F)(F)C(F)(F)C(F)(F)C(F)(F)C(F)(F)C(F)(F)C(F)(F)C(F)(F)C(F)(F)C(F)(F)C(F)(F)C(F)(F)C(F)(F)C(F)(F)C(F)(F)C(F)(F)C(F)(F)C(F)(F)C(F)(F)C(F)(F)C(F)(F)C(F)(F)C(F)(F)C(F)(F)C(F)(F)C(F)(F)C(F)(F)C(F)(F)C(F)(F)C(F)(F)C(F)(F)C(F)(F)C(F)(F)C(F)(F)C(F)(F)C(F)(F)C(F)(F)C(F)(F)C(F)(F)C(F)(F)C(F)(F)C(F)(F)C(F)(F)C(F)(F)C(F)(F)C(F)(F)C(F)(F)C(F)(F)C(F)(F)C(F)(F)C(F)(F)C(F)(F)C(F)(F)C(F)(F)C(F)(F)C(F)(F)C(F)(F)C(F)(F)C(F)(F)C(F)(F)C(F)(F)C(F)(F)C(F)(F)C(F)(F)C(F)(F)C(F)(F)C(F)(F)C(F)(F)C(F)(F)C(F)(F)C(F)(F)C(F)(F)C(F)(F)C(F)(F)C(F)(F)C(F)(F)C(F)(F)C(F)(F)C(F)(F)C(F)(F)C(F)(F)C(F)(F)C(F)(F)C(F)(F)C(F)(F)C(F)(F)C(F)(F)C(F)(F)C(F)(F)C(F)(F)C(F)(F)C(F)(F)C(F)(F)C(F)(F)C(F)(F)C(F)(F)C(F)(F)C(F)(F)C(F)(F)C(F)(F)C(F)(F)C(F)(F)C(F)(F)C(F)(F)C(F)(F)C(F)(F)C(F)(F)C(F)(F)C(F)(F)C(F)(F)C(F)(F)C(F)(F)C(F)(F)C(F)(F)C(F)(F)C(F)(F)C(F)(F)C(F)(F)C(F)(F)C(F)(F)C(F)(F)C(F)(F)C(F)(F)C(F)(F)C(F)(F)C(F)(F)C(F)(F)C(F)(F)C(F)(F)C(F)(F)C(F)(F)C(F)(F)C(F)(F)C(F)(F)C(F)(F)C(F)(F)C(F)(F)C(F)(F)C(F)(F)C(F)(F)C(F)(F)C(F)(F)C(F)(F)C(F)(F)C(F)(F)C(F)(F)C(F)(F)C(F)(F)C(F)(F)C(F)(F)C(F)(F)C(F)(F)C(F)(F)C(F)(F)C(F)(F)C(F)(F)C(F)(F)C(F)(F)C(F)(F)C(F)(F)C(F)(F)C(F)(F)C(F)(F)C(F)(F)C(F)(F)C(F)(F)C(F)(F)C(F)(F)C(F)(F)C(F)(F)C(F)(F)C(F)(F)C(F)(F)C(F)(F)C(F)(F)C(F)(F)C(F)(F)C(F)(F)C(F)(F)C(F)(F)C(F)(F)C(F)(F)C(F)(F)C(F)(F)C(F)(F)C(F)(F)C(F)(F)C(F)(F)C(F)(F)C(F)(F)C(F)(F)C(F)(F)C(F)(F)C(F)(F)C(F)(F)C(F)(F)C(F)(F)C(F)(F)C(F)(F)C(F)(F)C(F)(F)C(F)(F)C(F)(F)C(F)(F)C(F)(F)C(F)(F)C(F)(F)C(F)(F)C(F)(F)C(F)(F)C(F)(F)C(F)(F)C(F)(F)C(F)(F)C(F)(F)C(F)(F)C(F)(F)C(F)(F)C(F)(F)C(F)(F)C(F)(F)C(F)(F)C(F)(F)C(F)(F)C(F)(F)C(F)(F)C(F)(F)C(F)(F)C(F)(F)C(F)(F)C(F)(F)C(F)(F)C(F)(F)C(F)(F)C(F)(F)C(F)(F)C(F)(F)C(F)(F)C(F)(F)C(F)(F)C(F)(F)C(F)(F)C(F)(F)C(F)(F)C(F)(F)C(F)(F)C(F)(F)C(F)(F)C(F)(F)C(F)(F)C(F)(F)C(F)(F)C(F)(F)C(F)(F)C(F)(F)C(F)(F)C(F)(F)C(F)(F)C(F)(F)C(F)(F)C(F)(F)C(F)(F)C(F)(F)C(F)(F)C(F)(F)C(F)(F)C(F)(F)C(F)(F)C(F)(F)C(F)(F)C(F)(F)C(F)(F)C(F)(F)C(F)(F)C(F)(F)C(F)(F)C(F)(F)C(F)(F)C(F)(F)C(F)(F)C(F)(F)C(F)(F)C(F)(F)C(F)(F)C(F)(F)C(F)(F)C(F)(F)C(F)(F)C(F)(F)C(F)(F)C(F)(F)C(F)(F)C(F)(F)C(F)(F)C(F)(F)C(F)(F)C(F)(F)C(F)(F)C(F)(F)C(F)(F)C(F)(F)C(F)(F)C(F)(F)C(F)(F)C(F)(F)C(F)(F)C(F)(F)C(F)(F)C(F)(F)C(F)(F)C(F)(F)C(F)(F)C(F)(F)C(F)(F)C(F)(F)C(F)(F)C(F)(F)C(F)(F)C(F)(F)C(F)(F)C(F)(F)C(F)(F)C(F)(F)C(F)(F)C(F)(F)C(F)(F)C(F)(F)C(F)(F)C(F)(F)C(F)(F)C(F)(F)C(F)(F)C(F)(F)C(F)(F)C(F)(F)C(F)(F)C(F)(F)C(F)(F)C(F)(F)C(F)(F)C(F)(F)C(F)(F)C(F)(F)C(F)(F)C(F)(F)C(F)(F)C(F)(F)C(F)(F)C(F)(F)C(F)(F)C(F)(F)C(F)(F)C(F)(F)C(F)(F)C(F)(F)C(F)(F)C(F)(F)C(F)(F)C(F)(F)C(F)(F)C(F)(F)C(F)(F)C(F)(F)C(F)(F)C(F)(F)C(F)(F)C(F)(F)C(F)(F)C(F)(F)C(F)(F)C(F)(F)C(F)(F)C(F)(F)C(F)(F)C(F)(F)C(F)(F)C(F)(F)C(F)(F)C(F)(F)C(F)(F)C(F)(F)C(F)(F)C(F)(F)C(F)(F)C(F)(F)C(F)(F)C(F)(F)C(F)(F)C(F)(F)C(F)(F)C(F)(F)C(F)(F)C(F)(F)C(F)(F)C(F)(F)C(F)(F)C(F)(F)C(F)(F)C(F)(F)C(F)(F)C(F)(F)C(F)(F)C(F)(F)C(F)(F)C(F)(F)C(F)(F)C(F)(F)C(F)(F)C(F)(F)C(F)(F)C(F)(F)C(F)(F)C(F)(F)C(F)(F)C(F)(F)C(F)(F)C(F)(F)C(F)(F)C(F)(F)C(F)(F)C(F)(F)C(F)(F)C(F)(F)C(F)(F)C(F)(F)C(F)(F)C(F)(F)C(F)(F)C(F)(F)C(F)(F)C(F)(F)C(F)(F)C(F)(F)C(F)(F)C(F)(F)C(F)(F)C(F)(F)C(F)(F)C(F)(F)C(F)(F)C(F)(F)C(F)(F)C(F)(F)C(F)(F)C(F)(F)C(F)(F)C(F)(F)C(F)(F)C(F)(F)C(F)(F)C(F)(F)C(F)(F)C(F)(F)C(F)(F)C(F)(F)C(F)(F)C(F)(F)C(F)(F)C(F)(F)C(F)(F)C(F)(F)C(F)(F)C(F)(F)C(F)(F)C(F)(F)C(F)(F)C(F)(F)C(F)(F)C(F)(F)C(F)(F)C(F)(F)C(F)(F)C(F)(F)C(F)(F)C(F)(F)C(F)(F)C(F)(F)C(F)(F)C(F)(F)C(F)(F)C(F)(F)C(F)(F)C(F)(F)C(F)(F)C(F)(F)C(F)(F)C(F)(F)C(F)(F)C(F)(F)C(F)(F)C(F)(F)C(F)(F)C(F)(F)C(F)(F)C(F)(F)C(F)(F)C(F)(F)C(F)(F)C(F)(F)C(F)(F)C(F)(F)C(F)(F)C(F)(F)C(F)(F)C(F)(F)C(F)(F)C(F)(F)C(F)(F)C(F)(F)C(F)(F)C(F)(F)C(F)(F)C(F)(F)C(F)(F)C(F)(F)C(F)(F)C(F)(F)C(F)(F)C(F)(F)C(F)(F)C(F)(F)C(F)(F)C(F)(F)C(F)(F)C(F)(F)C(F)(F)C(F)(F)C(F)(F)C(F)(F)C(F)(F)C(F)(F)C(F)(F)C(F)(F)C(F)(F)C(F)(F)C(F)(F)C(F)(F)C(F)(F)C(F)(F)C(F)(F)C(F)(F)C(F)(F)C(F)(F)C(F)(F)C(F)(F)C(F)(F)C(F)(F)C(F)(F)C(F)(F)C(F)(F)C(F)(F)C(F)(F)C(F)(F)C(F)(F)C(F)(F)C(F)(F)C(F)(F)C(F)(F)C(F)(F)C(F)(F)C(F)(F)C(F)(F)C(F)(F)C(F)(F)C(F)(F)C(F)(F)C(F)(F)C(F)(F)C(F)(F)C(F)(F)C(F)(F)C(F)(F)C(F)(F)C(F)(F)C(F)(F)C(F)(F)C(F)(F)C(F)(F)C(F)(F)C(F)(F)C(F)(F)C(F)(F)C(F)(F)C(F)(F)C(F)(F)C(F)(F)C(F)(F)C(F)(F)C(F)(F)C(F)(F)C(F)(F)C(F)(F)C(F)(F)C(F)(F)C(F)(F)C(F)(F)C(F)(F)C(F)(F)C(F)(F)C(F)(F)C(F)(F)C(F)(F)C(F)(F)C(F)(F)C(F)(F)C(F)(F)C(F)(F)C(F)(F)C(F)(F)C(F)(F)C(F)(F)C(F)(F)C(F)(F)C(F)(F)C(F)(F)C(F)(F)C(F)(F)C(F)(F)C(F)(F)C(F)(F)C(F)(F)C(F)(F)C(F)(F)C(F)(F)C(F)(F)C(F)(F)C(F)(F)C(F)(F)C(F)(F)C(F)(F)C(F)(F)C(F)(F)C(F)(F)C(F)(F)C(F)(F)C(F)(F)C(F)(F)C(F)(F)C(F)(F)C(F)(F)C(F)(F)C(F)(F)C(F)(F)C(F)(F)C(F)(F)C(F)(F)C(F)(F)C(F)(F)C(F)(F)C(F)(F)C(F)(F)C(F)(F)C(F)(F)C(F)(F)C(F)(F)C(F)(F)C(F)(F)C(F)(F)C(F)(F)C(F)(F)C(F)(F)C(F)(F)C(F)(F)C(F)(F)C(F)(F)C(F)(F)C(F)(F)C(F)(F)C(F)(F)C(F)(F)C(F)(F)C(F)(F)C(F)(F)C(F)(F)C(F)(F)C(F)(F)C(F)(F)C(F)(F)C(F)(F)C(F)(F)C(F)(F)C(F)(F)C(F)(F)C(F)(F)C(F)(F)C(F)(F)C(F)(F)C(F)(F)C(F)(F)C(F)(F)C(F)(F)C(F)(F)C(F)(F)C(F)(F)C(F)(F)C(F)(F)C(F)(F)C(F)(F)C(F)(F)C(F)(F)C(F)(F)C(F)(F)C(F)(F)C(F)(F)C(F)(F)C(F)(F)C(F)(F)C(F)(F)C(F)(F)C(F)(F)C(F)(F)C(F)(F)C(F)(F)C(F)(F)C(F)(F)C(F)(F)C(F)(F)C(F)(F)C(F)(F)C(F)(F)C(F)(F)C(F)(F)C(F)(F)C(F)(F)C(F)(F)C(F)(F)C(F)(F)C(F)(F)C(F)(F)C(F)(F)C(F)(F)C(F)(F)C(F)(F)C(F)(F)C(F)(F)C(F)(F)C(F)(F)C(F)(F)C(F)(F)C(F)(F)C(F)(F)C(F)(F)C(F)(F)C(F)(F)C(F)(F)C(F)(F)C(F)(F)C(F)(F)C(F)(F)C(F)(F)C(F)(F)C(F)(F)C(F)(F)C(F)(F)C(F)(F)C(F)(F)C(F)(F)C(F)(F)C(F)(F)C(F)(F)C(F)(F)C(F)(F)C(F)(F)C(F)(F)C(F)(F)C(F)(F)C(F)(F)C(F)(F)C(F)(F)C(F)(F)C(F)(F)C(F)(F)C(F)(F)C(F)(F)C(F)(F)C(F)(F)C(F)(F)C(F)(F)C(F)(F)C(F)(F)C(F)(F)C(F)(F)C(F)(F)C(F)(F)C(F)(F)C(F)(F)C(F)(F)C(F)(F)C(F)(F)C(F)(F)C(F)(F)C(F)(F)C(F)(F)C(F)(F)C(F)(F)C(F)(F)C(F)(F)C(F)(F)C(F)(F)C(F)(F)C(F)(F)C(F)(F)C(F)(F)C(F)(F)C(F)(F)C(F)(F)C(F)(F)C(F)(F)C(F)(F)C(F)(F)C(F)(F)C(F)(F)C(F)(F)C(F)(F)C(F)(F)C(F)(F)C(F)(F)C(F)(F)C(F)(F)C(F)(F)C(F)(F)C(F)(F)C(F)(F)C(F)(F)C(F)(F)C(F)(F)C(F)(F)C(F)(F)C(F)(F)C(F)(F)C(F)(F)C(F)(F)C(F)(F)C(F)(F)C(F)(F)C(F)(F)C(F)(F)C(F)(F)C(F)(F)C(F)(F)C(F)(F)C(F)(F)C(F)(F)C(F)(F)C(F)(F)C(F)(F)C(F)(F)C(F)(F)C(F)(F)C(F)(F)C(F)(F)C(F)(F)C(F)(F)C(F)(F)C(F)(F)C(F)(F)C(F)(F)C(F)(F)C(F)(F)C(F)(F)C(F)(F)C(F)(F)C(F)(F)C(F)(F)C(F)(F)C(F)(F)C(F)(F)C(F)(F)C(F)(F)C(F)(F)C(F)(F)C(F)(F)C(F)(F)C(F)(F)C(F)(F)C(F)(F)C(F)(F)C(F)(F)C(F)(F)C(F)(F)C(F)(F)C(F)(F)C(F)(F)C(F)(F)C(F)(F)C(F)(F)C(F)(F)C(F)(F)C(F)(F)C(F)(F)C(F)(F)C(F)(F)C(F)(F)C(F)(F)C(F)(F)C(F)(F)C(F)(F)C(F)(F)C(F)(F)C(F)(F)C(F)(F)C(F)(F)C(F)(F)C(F)(F)C(F)(F)C(F)(F)C(F)(F)C(F)(F)C(F)(F)C(F)(F)C(F)(F)C(F)(F)C(F)(F)C(F)(F)C(F)(F)C(F)(F)C(F)(F)C(F)(F)C(F)(F)C(F)(F)C(F)(F)C(F)(F)C(F)(F)C(F)(F)C(F)(F)C(F)(F)C(F)(F)C(F)(F)C(F)(F)C(F)(F)C(F)(F)C(F)(F)C(F)(F)C(F)(F)C(F)(F)C(F)(F)C(F)(F)C(F)(F)C(F)(F)C(F)(F)C(F)(F)C(F)(F)C(F)(F)C(F)(F)C(F)(F)C(F)(F)C(F)(F)C(F)(F)C(F)(F)C(F)(F)C(F)(F)C(F)(F)C(F)(F)C(F)(F)C(F)(F)C(F)(F)C(F)(F)C(F)(F)C(F)(F)C(F)(F)C(F)(F)C(F)(F)C(F)(F)C(F)(F)C(F)(F)C(F)(F)C(F)(F)C(F)(F)C(F)(F)C(F)(F)C(F)(F)C(F)(F)C(F)(F)C(F)(F)C(F)(F)C(F)(F)C(F)(F)C(F)(F)C(F)(F)C(F)(F)C(F)(F)C(F)(F)C(F)(F)C(F)(F)C(F)(F)C(F)(F)C(F)(F)C(F)(F)C(F)(F)C(F)(F)C(F)(F)C(F)(F)C(F)(F)C(F)(F)C(F)(F)C(F)(F)C(F)(F)C(F)(F)C(F)(F)C(F)(F)C(F)(F)C(F)(F)C(F)(F)C(F)(F)C(F)(F)C(F)(F)C(F)(F)C(F)(F)C(F)(F)C(F)(F)C(F)(F)C(F)(F)C(F)(F)C(F)(F)C(F)(F)C(F)(F)C(F)(F)C(F)(F)C(F)(F)C(F)(F)C(F)(F)C(F)(F)C(F)(F)C(F)(F)C(F)(F)C(F)(F)C(F)(F)C(F)(F)C(F)(F)C(F)(F)C(F)(F)C(F)(F)C(F)(F)C(F)(F)C(F)(F)C(F)(F)C(F)(F)C(F)(F)C(F)(F)C(F)(F)C(F)(F)C(F)(F)C(F)(F)C(F)(F)C(F)(F)C(F)(F)C(F)(F)C(F)(F)C(F)(F)C(F)(F)C(F)(F)C(F)(F)C(F)(F)C(F)(F)C(F)(F)C(F)(F)C(F)(F)C(F)(F)C(F)(F)C(F)(F)C(F)(F)C(F)(F)C(F)(F)C(F)(F)C(F)(F)C(F)(F)C(F)(F)C(F)(F)C(F)(F)C(F)(F)C(F)(F)C(F)(F)C(F)(F)C(F)(F)C(F)(F)C(F)(F)C(F)(F)C(F)(F)C(F)(F)C(F)(F)C(F)(F)C(F)(F)C(F)(F)C(F)(F)C(F)(F)C(F)(F)C(F)(F)C(F)(F)C(F)(F)C(F)(F)C(F)(F)C(F)(F)C(F)(F)C(F)(F)C(F)(F)C(F)(F)C(F)(F)C(F)(F)C(F)(F)C(F)(F)C(F)(F)C(F)(F)C(F)(F)C(F)(F)C(F)(F)C(F)(F)C(F)(F)C(F)(F)C(F)(F)C(F)(F)C(F)(F)C(F)(F)C(F)(F)C(F)(F)C(F)(F)C(F)(F)C(F)(F)C(F)(F)C(F)(F)C(F)(F)C(F)(F)C(F)(F)C(F)(F)C(F)(F)C(F)(F)C(F)(F)C(F)(F)C(F)(F)C(F)(F)C(F)(F)C(F)(F)C(F)(F)C(F)(F)C(F)(F)C(F)(F)C(F)(F)C(F)(F)C(F)(F)C(F)(F)C(F)(F)C(F)(F)C(F)(F)C(F)(F)C(F)(F)C(F)(F)C(F)(F)C(F)(F)C(F)(F)C(F)(F)C(F)(F)C(F)(F)C(F)(F)C(F)(F)C(F)(F)C(F)(F)C(F)(F)C(F)(F)C(F)(F)C(F)(F)C(F)(F)C(F)(F)C(F)(F)C(F)(F)C(F)(F)C(F)(F)C(F)(F)C(F)(F)C(F)(F)C(F)(F)C(F)(F)C(F)(F)C(F)(F)C(F)(F)C(F)(F)C(F)(F)C(F)(F)C(F)(F)C(F)(F)C(F)(F)C(F)(F)C(F)(F)C(F)(F)C(F)(F)C(F)(F)C(F)(F)C(F)(F)C(F)(F)C(F)(F)C(F)(F)C(F)(F)C(F)(F)C(F)(F)C(F)(F)C(F)(F)C(F)(F)C(F)(F)C(F)(F)C(F)(F)C(F)(F)C(F)(F)C(F)(F)C(F)(F)C(F)(F)C(F)(F)C(F)(F)C(F)(F)C(F)(F)C(F)(F)C(F)(F)C(F)(F)C(F)(F)C(F)(F)C(F)(F)C(F)(F)C(F)(F)C(F)(F)C(F)(F)C(F)(F)C(F)(F)C(F)(F)C(F)(F)C(F)(F)C(F)(F)C(F)(F)C(F)(F)C(F)(F)C(F)(F)C(F)(F)C(F)(F)C(F)(F)C(F)(F)C(F)(F)C(F)(F)C(F)(F)C(F)(F)C(F)(F)C(F)(F)C(F)(F)C(F)(F)C(F)(F)C(F)(F)C(F)(F)C(F)(F)C(F)(F) |       |       |      |   |    |



|         |                                                                     |                                                                                              |       |       |      |   |     |
|---------|---------------------------------------------------------------------|----------------------------------------------------------------------------------------------|-------|-------|------|---|-----|
| QL04421 | perfluoroalkanesulfonamido quaternary ammonium disulfonate B, n=6   | S(N(CC(O)CS(=O)O)=O)CCC[N+](CC(O)CS(=O)O)(C)C(=O)(=O)C(F)(F)C(F)(F)C(F)(F)C(F)(F)F           | -8.22 | 18.31 | 3.09 | P | OUT |
| QL04422 | perfluoroalkanesulfonamido quaternary ammonium disulfonate B, n=5   | S(N(CC(O)CS(=O)O)=O)CCC[N+](CC(O)CS(=O)O)(C)C(=O)(=O)C(F)(F)C(F)(F)C(F)(F)C(F)(F)F           | -7.81 | 16.18 | 2.98 | P | OUT |
| QL04423 | perfluoroalkanesulfonamido quaternary ammonium disulfonate B, n=4   | S(N(CC(O)CS(=O)O)=O)CCC[N+](CC(O)CS(=O)O)(C)C(=O)(=O)C(F)(F)C(F)(F)C(F)(F)C(F)(F)F           | -7.37 | 13.85 | 2.86 | P | OUT |
| QL04424 | perfluoroalkanesulfonamido quaternary ammonium disulfonate B, n=3   | S(N(CC(O)CS(=O)O)=O)CCC[N+](CC(O)CS(=O)O)(C)C(=O)(=O)C(F)(F)C(F)(F)C(F)(F)F                  | -6.94 | 11.29 | 2.75 | P | OUT |
| QL04425 | perfluoroalkanesulfonamido quaternary ammonium disulfonate B, n=2   | S(N(CC(O)CS(=O)O)=O)CCC[N+](CC(O)CS(=O)O)(C)C(=O)(=O)C(F)(F)C(F)(F)F                         | -6.87 | 8.47  | 2.80 | P | OUT |
| QL04426 | perfluoroalkanesulfonamido quaternary diol sulfonic acid, n=6       | S(N(CC(O)CS(O)(=O)=O)CCC[N+](CCO)(C)C(=O)(=O)C(F)(F)C(F)(F)C(F)(F)C(F)(F)C(F)(F)F            | -7.90 | 20.31 | 2.90 | P | OUT |
| QL04427 | perfluoroalkanesulfonamido quaternary diol sulfonic acid, n=5       | S(N(CC(O)CS(O)(=O)=O)CCC[N+](CCO)(C)C(=O)(=O)C(F)(F)C(F)(F)C(F)(F)C(F)(F)F                   | -7.58 | 18.03 | 2.83 | P | OUT |
| QL04428 | perfluoroalkanesulfonamido quaternary diol sulfonic acid, n=4       | S(N(CC(O)CS(O)(=O)=O)CCC[N+](CCO)(C)C(=O)(=O)C(F)(F)C(F)(F)C(F)(F)C(F)(F)F                   | -7.09 | 15.52 | 2.70 | P | OUT |
| QL04429 | perfluoroalkanesulfonamido quaternary diol sulfonic acid, n=3       | S(N(CC(O)CS(O)(=O)=O)CCC[N+](CCO)(C)C(=O)(=O)C(F)(F)C(F)(F)C(F)(F)F                          | -6.61 | 12.73 | 2.58 | P | OUT |
| QL04430 | N-ethyl perfluorodecane sulfonamido acetic acid, n=10               | S(N(CC)CC(O)=O)(=O)(=O)C(F)(F)C(F)(F)C(F)(F)C(F)(F)C(F)(F)C(F)(F)C(F)(F)C(F)(F)F             | -9.53 | 42.86 | 2.95 | P | IN  |
| QL04431 | N-ethyl perfluorononane sulfonamido acetic acid, n=9                | S(N(CC)CC(O)=O)(=O)(=O)C(F)(F)C(F)(F)C(F)(F)C(F)(F)C(F)(F)C(F)(F)C(F)(F)F                    | -9.31 | 41.30 | 2.90 | P | IN  |
| QL04432 | N-ethyl perfluoropropane sulfonamido acetic acid, n=3               | S(N(CC)CC(O)=O)(=O)(=O)C(F)(F)C(F)(F)F                                                       | -6.47 | 25.00 | 2.18 | P | OUT |
| QL04433 | N-ethyl perfluoroethane sulfonamido acetic acid, n=2                | S(N(CC)CC(O)=O)(=O)(=O)C(F)(F)C(F)(F)F                                                       | -5.51 | 20.00 | 1.92 | P | OUT |
| QL04434 | perfluoroalkanesulfonamido betaine C, n=6                           | S(N(CC)CCC[N+](CCC(O)=O)(C)C(=O)(=O)C(F)(F)C(F)(F)C(F)(F)C(F)(F)C(F)(F)F                     | -8.46 | 22.41 | 3.07 | P | OUT |
| QL04435 | perfluoroalkanesulfonamido betaine C, n=5                           | S(N(CC)CCC[N+](CCC(O)=O)(C)C(=O)(=O)C(F)(F)C(F)(F)C(F)(F)C(F)(F)F                            | -7.98 | 20.00 | 2.94 | P | OUT |
| QL04436 | perfluoroalkanesulfonamido quaternary ammonium carboxylic acid, n=6 | S(N(CCC(=O)O)CCC[N+](C)(C)C(=O)(=O)C(F)(F)C(F)(F)C(F)(F)C(F)(F)C(F)(F)F                      | -7.76 | 23.64 | 2.75 | P | OUT |
| QL04437 | perfluoroalkanesulfonamido quaternary ammonium carboxylic acid, n=5 | S(N(CCC(=O)O)CCC[N+](C)(C)C(=O)(=O)C(F)(F)C(F)(F)C(F)(F)C(F)(F)F                             | -7.46 | 21.15 | 2.69 | P | OUT |
| QL04438 | perfluoroalkanesulfonamido quaternary ammonium carboxylic acid, n=4 | S(N(CCC(=O)O)CCC[N+](C)(C)C(=O)(=O)C(F)(F)C(F)(F)C(F)(F)F                                    | -6.85 | 18.37 | 2.52 | P | OUT |
| QL04439 | perfluoroalkanesulfonamido quaternary ammonium carboxylic acid, n=3 | S(N(CCC(=O)O)CCC[N+](C)(C)C(=O)(=O)C(F)(F)C(F)(F)F                                           | -6.42 | 15.22 | 2.43 | P | OUT |
| QL04440 | perfluoroalkanesulfonamido quaternary ammonium dicarboxylate B, n=6 | S(N(CCC(O)=O)CCC[N+](CC(O)=O)(C)C(=O)(=O)C(F)(F)C(F)(F)C(F)(F)C(F)(F)C(F)(F)F                | -8.16 | 22.41 | 2.95 | P | OUT |
| QL04441 | perfluoroalkanesulfonamido quaternary ammonium dicarboxylate B, n=5 | S(N(CCC(O)=O)CCC[N+](CC(O)=O)(C)C(=O)(=O)C(F)(F)C(F)(F)C(F)(F)C(F)(F)F                       | -7.84 | 20.00 | 2.88 | P | OUT |
| QL04442 | perfluoroalkanesulfonamido quaternary ammonium dicarboxylate B, n=4 | S(N(CCC(O)=O)CCC[N+](CC(O)=O)(C)C(=O)(=O)C(F)(F)C(F)(F)C(F)(F)F                              | -7.22 | 17.31 | 2.70 | P | OUT |
| QL04443 | perfluoroalkanesulfonamido quaternary ammonium dicarboxylate C, n=6 | S(N(CCC(O)=O)CCC[N+](CCC(O)=O)(C)C(=O)(=O)C(F)(F)C(F)(F)C(F)(F)C(F)(F)C(F)(F)F               | -8.37 | 21.31 | 3.06 | P | OUT |
| QL04444 | perfluoroalkanesulfonamido quaternary ammonium dicarboxylate C, n=5 | S(N(CCC(O)=O)CCC[N+](CCC(O)=O)(C)C(=O)(=O)C(F)(F)C(F)(F)C(F)(F)C(F)(F)F                      | -7.82 | 18.97 | 2.90 | P | OUT |
| QL04445 | perfluoroalkanesulfonamido quaternary ammonium dicarboxylate C, n=4 | S(N(CCC(O)=O)CCC[N+](CCC(O)=O)(C)C(=O)(=O)C(F)(F)C(F)(F)C(F)(F)F                             | -7.46 | 16.36 | 2.83 | P | OUT |
| QL04446 | perfluoroalkanesulfonamido quaternary ammonium dicarboxylate C, n=3 | S(N(CCC(O)=O)CCC[N+](CCC(O)=O)(C)C(=O)(=O)C(F)(F)C(F)(F)F                                    | -6.88 | 13.46 | 2.67 | P | OUT |
| QL04447 | perfluorooctanesulfonamido amine carboxylic acid B, n=8             | S(N(CCC(O)=O)CCCN(C)C(=O)(=O)C(F)(F)C(F)(F)C(F)(F)C(F)(F)C(F)(F)C(F)(F)F                     | -8.66 | 29.82 | 2.95 | P | OUT |
| QL04448 | perfluoroheptanesulfonamido amine carboxylic acid B, n=7            | S(N(CCC(O)=O)CCCN(C)C(=O)(=O)C(F)(F)C(F)(F)C(F)(F)C(F)(F)C(F)(F)F                            | -8.40 | 27.78 | 2.90 | P | OUT |
| QL04449 | perfluorohexanesulfonamido amine carboxylic acid B, n=6             | S(N(CCC(O)=O)CCCN(C)C(=O)(=O)C(F)(F)C(F)(F)C(F)(F)C(F)(F)F                                   | -7.89 | 25.49 | 2.75 | P | OUT |
| QL04450 | perfluoropentanesulfonamido amine carboxylic acid B, n=5            | S(N(CCC(O)=O)CCCN(C)C(=O)(=O)C(F)(F)C(F)(F)C(F)(F)C(F)(F)F                                   | -7.59 | 22.92 | 2.70 | P | OUT |
| QL04451 | perfluorobutanesulfonamido amine carboxylic acid B, n=4             | S(N(CCC(O)=O)CCCN(C)C(=O)(=O)C(F)(F)C(F)(F)C(F)(F)F                                          | -6.97 | 20.00 | 2.52 | P | OUT |
| QL04452 | perfluoropropanesulfonamido amine carboxylic acid B, n=3            | S(N(CCC(O)=O)CCCN(C)C(=O)(=O)C(F)(F)C(F)(F)F                                                 | -6.54 | 16.67 | 2.44 | P | OUT |
| QL04453 | perfluorohexanesulfonamido amine sulfonic acid, n=6                 | S(N(CCCS(=O)O)(O)=O)C(CO)CCN(C)C(=O)(=O)C(F)(F)C(F)(F)C(F)(F)C(F)(F)F                        | -7.60 | 22.03 | 2.73 | P | OUT |
| QL04454 | perfluoropentanesulfonamido amine sulfonic acid, n=5                | S(N(CCCS(=O)O)(O)=O)C(CO)CCN(C)C(=O)(=O)C(F)(F)C(F)(F)C(F)(F)C(F)(F)F                        | -7.29 | 19.64 | 2.67 | P | OUT |
| QL04455 | perfluoroalkanesulfonamido quaternary ammonium disulfonate A, n=8   | S(N(CCCS(=O)O)(O)=O)CCC[N+](CCCS(=O)O)(O)=O)(C)C(=O)(=O)C(F)(F)C(F)(F)C(F)(F)C(F)(F)C(F)(F)F | -8.88 | 22.67 | 3.24 | P | OUT |
| QL04456 | perfluoroalkanesulfonamido quaternary ammonium disulfonate A, n=7   | S(N(CCCS(=O)O)(O)=O)CCC[N+](CCCS(=O)O)(O)=O)(C)C(=O)(=O)C(F)(F)C(F)(F)C(F)(F)C(F)(F)C(F)(F)F | -8.63 | 20.83 | 3.18 | P | OUT |
| QL04457 | perfluoroalkanesulfonamido quaternary ammonium disulfonate A, n=6   | S(N(CCCS(=O)O)(O)=O)CCC[N+](CCCS(=O)O)(O)=O)(C)C(=O)(=O)C(F)(F)C(F)(F)C(F)(F)C(F)(F)F        | -8.25 | 18.84 | 3.08 | P | OUT |
| QL04458 | perfluoroalkanesulfonamido quaternary ammonium disulfonate A, n=5   | S(N(CCCS(=O)O)(O)=O)CCC[N+](CCCS(=O)O)(O)(C)C(=O)(=O)C(F)(F)C(F)(F)C(F)(F)C(F)(F)F           | -7.91 | 16.67 | 3.00 | P | OUT |



|         |                                                                           |                                                                                        |       |       |      |   |     |
|---------|---------------------------------------------------------------------------|----------------------------------------------------------------------------------------|-------|-------|------|---|-----|
| QL04459 | perfluoroalkanesulfonamido quaternary ammonium disulfonate A, n=4         | S(N(CCCS(=O)(O)=O)CCC[N+](CCCS(=O)(O)=O)(C)C(=O)(=O)C(F)(F)C(F)(F)C(F)(F)F             | -7.41 | 14.29 | 2.86 | P | OUT |
| QL04460 | perfluoroalkanesulfonamido quaternary ammonium disulfonate A, n=3         | S(N(CCCS(=O)(O)=O)CCC[N+](CCCS(=O)(O)=O)(C)C(=O)(=O)C(F)(F)C(F)(F)C(F)(F)F             | -6.99 | 11.67 | 2.76 | P | OUT |
| QL04461 | perfluoroalkanesulfonamido quaternary ammonium triol sulfonic acid, n=6   | S(N(CCCS(O)(=O)=O)C(CO)CC[N+](CC(CO)O)(C)C(=O)(=O)C(F)(F)C(F)(F)C(F)(F)C(F)(F)C(F)(F)F | -8.06 | 18.31 | 3.02 | P | OUT |
| QL04462 | perfluoroalkanesulfonamido quaternary ammonium triol sulfonic acid, n=5   | S(N(CCCS(O)(=O)=O)C(CO)CC[N+](CC(CO)O)(C)C(=O)(=O)C(F)(F)C(F)(F)C(F)(F)C(F)(F)F        | -7.68 | 16.18 | 2.92 | P | OUT |
| QL04463 | perfluoroalkanesulfonamido quaternary ammonium triol sulfonic acid, n=4   | S(N(CCCS(O)(=O)=O)C(CO)CC[N+](CC(CO)O)(C)C(=O)(=O)C(F)(F)C(F)(F)C(F)(F)C(F)(F)F        | -7.32 | 13.85 | 2.84 | P | OUT |
| QL04464 | perfluoroalkanesulfonamido quaternary ammonium triol sulfonic acid, n=3   | S(N(CCCS(O)(=O)=O)C(CO)CC[N+](CC(CO)O)(C)C(=O)(=O)C(F)(F)C(F)(F)C(F)(F)F               | -6.81 | 11.29 | 2.70 | P | OUT |
| QL04465 | perfluoroalkanesulfonamido quaternary ammonium triol sulfonic acid, n=2   | S(N(CCCS(O)(=O)=O)C(CO)CC[N+](CC(CO)O)(C)C(=O)(=O)C(F)(F)C(F)(F)C(F)(F)F               | -6.65 | 8.47  | 2.71 | P | OUT |
| QL04466 | perfluoroalkanesulfonamido quaternary ammonium alcohol sulfonic acid, n=8 | S(N(CCCS(O)(=O)=O)CCC[N+](CCO)(C)C(=O)(=O)C(F)(F)C(F)(F)C(F)(F)C(F)(F)C(F)(F)C(F)(F)F  | -8.63 | 24.64 | 3.08 | P | OUT |
| QL04467 | perfluoroalkanesulfonamido quaternary ammonium alcohol sulfonic acid, n=7 | S(N(CCCS(O)(=O)=O)CCC[N+](CCO)(C)C(=O)(=O)C(F)(F)C(F)(F)C(F)(F)C(F)(F)C(F)(F)F         | -8.40 | 22.73 | 3.04 | P | OUT |
| QL04468 | perfluoroalkanesulfonamido quaternary ammonium alcohol sulfonic acid, n=6 | S(N(CCCS(O)(=O)=O)CCC[N+](CCO)(C)C(=O)(=O)C(F)(F)C(F)(F)C(F)(F)C(F)(F)C(F)(F)F         | -7.93 | 20.63 | 2.90 | P | OUT |
| QL04469 | perfluoroalkanesulfonamido quaternary ammonium alcohol sulfonic acid, n=5 | S(N(CCCS(O)(=O)=O)CCC[N+](CCO)(C)C(=O)(=O)C(F)(F)C(F)(F)C(F)(F)C(F)(F)F                | -7.61 | 18.33 | 2.83 | P | OUT |
| QL04470 | perfluoroalkanesulfonamido quaternary ammonium alcohol sulfonic acid, n=4 | S(N(CCCS(O)(=O)=O)CCC[N+](CCO)(C)C(=O)(=O)C(F)(F)C(F)(F)C(F)(F)C(F)(F)F                | -7.12 | 15.79 | 2.70 | P | OUT |
| QL04471 | perfluoroalkanesulfonamido quaternary ammonium alcohol sulfonic acid, n=3 | S(N(CCCS(O)(=O)=O)CCC[N+](CCO)(C)C(=O)(=O)C(F)(F)C(F)(F)C(F)(F)F                       | -6.67 | 12.96 | 2.60 | P | OUT |
| QL04472 | perfluoroalkanesulfonamido quaternary ammonium alcohol sulfonic acid, n=2 | S(N(CCCS(O)(=O)=O)CCC[N+](CCO)(C)C(=O)(=O)C(F)(F)C(F)(F)F                              | -6.52 | 9.80  | 2.62 | P | OUT |
| QL04473 | perfluoroalkanesulfonamido sulfonate betaine E, n=6                       | S(N(CCO)CCC[N+](CC(O)CS(=O)(O)=O)(C)C(=O)(=O)C(F)(F)C(F)(F)C(F)(F)C(F)(F)C(F)(F)F      | -8.40 | 20.31 | 3.11 | P | OUT |
| QL04474 | perfluoroalkanesulfonamido sulfonate betaine E, n=5                       | S(N(CCO)CCC[N+](CC(O)CS(=O)(O)=O)(C)C(=O)(=O)C(F)(F)C(F)(F)C(F)(F)C(F)(F)F             | -8.03 | 18.03 | 3.02 | P | OUT |
| QL04475 | perfluoroalkanesulfonamido sulfonate betaine E, n=4                       | S(N(CCO)CCC[N+](CC(O)CS(=O)(O)=O)(C)C(=O)(=O)C(F)(F)C(F)(F)C(F)(F)C(F)(F)F             | -7.53 | 15.52 | 2.88 | P | OUT |
| QL04476 | perfluoroalkanesulfonamido sulfonate betaine E, n=3                       | S(N(CCO)CCC[N+](CC(O)CS(=O)(O)=O)(C)C(=O)(=O)C(F)(F)C(F)(F)C(F)(F)F                    | -7.19 | 12.73 | 2.82 | P | OUT |
| QL04477 | perfluoroalkanesulfonamido quaternary ammonium diol B, n=8                | S(N(CCO)CCC[N+](CCO)(C)C(=O)(=O)C(F)(F)C(F)(F)C(F)(F)C(F)(F)C(F)(F)C(F)(F)F            | -8.88 | 26.98 | 3.12 | P | OUT |
| QL04478 | perfluoroalkanesulfonamido quaternary ammonium diol B, n=7                | S(N(CCO)CCC[N+](CCO)(C)C(=O)(=O)C(F)(F)C(F)(F)C(F)(F)C(F)(F)C(F)(F)F                   | -8.66 | 25.00 | 3.08 | P | OUT |
| QL04479 | perfluoroalkanesulfonamido quaternary ammonium diol B, n=6                | S(N(CCO)CCC[N+](CCO)(C)C(=O)(=O)C(F)(F)C(F)(F)C(F)(F)C(F)(F)C(F)(F)F                   | -8.19 | 22.81 | 2.95 | P | OUT |
| QL04480 | perfluoroalkanesulfonamido quaternary ammonium diol B, n=5                | S(N(CCO)CCC[N+](CCO)(C)C(=O)(=O)C(F)(F)C(F)(F)C(F)(F)C(F)(F)F                          | -7.89 | 20.37 | 2.89 | P | OUT |
| QL04481 | perfluoroalkanesulfonamido quaternary ammonium diol B, n=4                | S(N(CCO)CCC[N+](CCO)(C)C(=O)(=O)C(F)(F)C(F)(F)C(F)(F)F                                 | -7.33 | 17.65 | 2.74 | P | OUT |
| QL04482 | perfluoroalkanesulfonamido quaternary ammonium diol B, n=3                | S(N(CCO)CCC[N+](CCO)(C)C(=O)(=O)C(F)(F)C(F)(F)F                                        | -6.84 | 14.58 | 2.62 | P | OUT |
| QL04483 | perfluoroalkanesulfonamido quaternary ammonium diol B, n=2                | S(N(CCO)CCC[N+](CCO)(C)C(=O)(=O)C(F)(F)C(F)F                                           | -6.16 | 11.11 | 2.44 | P | OUT |
| QL04484 | perfluorohexanesulfonamido amine carboxylic acid A, n=6                   | S(NC(C(O)=O)CCN(C)C(=O)(=O)C(F)(F)C(F)(F)C(F)(F)C(F)(F)F                               | -8.10 | 28.89 | 2.74 | P | OUT |
| QL04485 | perfluoropentanesulfonamido amine carboxylic acid A, n=5                  | S(NC(C(O)=O)CCN(C)C(=O)(=O)C(F)(F)C(F)(F)C(F)(F)F                                      | -7.80 | 26.19 | 2.69 | P | OUT |
| QL04486 | perfluorobutanesulfonamido amine carboxylic acid A, n=4                   | S(NC(C(O)=O)CCN(C)C(=O)(=O)C(F)(F)C(F)(F)C(F)(F)F                                      | -7.16 | 23.08 | 2.52 | P | OUT |
| QL04487 | perfluoroalkanesulfonamido quaternary ammonium triol, n=6                 | S(NC(CO)CC[N+](CC(O)CO)(C)C(=O)(=O)C(F)(F)C(F)(F)C(F)(F)C(F)(F)C(F)(F)F                | -8.41 | 22.41 | 3.05 | P | OUT |
| QL04488 | perfluoroalkanesulfonamido quaternary ammonium triol, n=5                 | S(NC(CO)CC[N+](CC(O)CO)(C)C(=O)(=O)C(F)(F)C(F)(F)C(F)(F)C(F)(F)F                       | -7.98 | 20.00 | 2.94 | P | OUT |
| QL04489 | perfluoroalkanesulfonamido quaternary ammonium triol, n=4                 | S(NC(CO)CC[N+](CC(O)CO)(C)C(=O)(=O)C(F)(F)C(F)(F)C(F)(F)F                              | -7.67 | 17.31 | 2.89 | P | OUT |
| QL04490 | perfluoroalkanesulfonamido quaternary ammonium triol, n=3                 | S(NC(CO)CC[N+](CC(O)CO)(C)C(=O)(=O)C(F)(F)C(F)(F)F                                     | -7.09 | 14.29 | 2.73 | P | OUT |
| QL04491 | perfluoroalkanesulfonamido quaternary ammonium diol A, n=6                | S(NCC(O)C[N+](CCO)(C)C(=O)(=O)C(F)(F)C(F)(F)C(F)(F)C(F)(F)F                            | -8.37 | 25.49 | 2.95 | P | OUT |
| QL04492 | perfluoroalkanesulfonamido quaternary ammonium diol A, n=5                | S(NCC(O)C[N+](CCO)(C)C(=O)(=O)C(F)(F)C(F)(F)C(F)(F)C(F)(F)F                            | -8.00 | 22.92 | 2.87 | P | OUT |
| QL04493 | perfluoroalkanesulfonamido quaternary ammonium diol A, n=4                | S(NCC(O)C[N+](CCO)(C)C(=O)(=O)C(F)(F)C(F)(F)C(F)(F)F                                   | -7.43 | 20.00 | 2.71 | P | OUT |
| QL04494 | perfluoroalkanesulfonamido quaternary ammonium oxide, n=9                 | S(NCCC[N+](O-)(C)C(=O)(=O)C(F)(F)C(F)(F)C(F)(F)C(F)(F)C(F)(F)C(F)(F)C(F)(F)F           | -9.40 | 36.54 | 3.07 | P | IN  |
| QL04495 | perfluoroalkanesulfonamido quaternary ammonium oxide, n=7                 | S(NCCC[N+](O-)(C)C(=O)(=O)C(F)(F)C(F)(F)C(F)(F)C(F)(F)C(F)(F)F                         | -8.71 | 32.61 | 2.89 | P | IN  |



|         |                                                             |            |                                                                                            |       |       |      |   |     |
|---------|-------------------------------------------------------------|------------|--------------------------------------------------------------------------------------------|-------|-------|------|---|-----|
| QL04496 | perfluoroalkanesulfonamido quaternary ammonium oxide, n=6   | 30295-56-8 | S(NCCC[N+](O-))(C)C(=O)=(O)C(F)(F)C(F)(F)C(F)(F)C(F)(F)C(F)(F)F                            | -8.18 | 30.23 | 2.74 | P | OUT |
| QL04497 | perfluoroalkanesulfonamido quaternary ammonium oxide, n=5   |            | S(NCCC[N+](O-))(C)C(=O)=(O)C(F)(F)C(F)(F)C(F)(F)C(F)(F)C(F)(F)F                            | -7.90 | 27.50 | 2.70 | P | OUT |
| QL04498 | perfluoroalkanesulfonamido quaternary ammonium oxide, n=4   |            | S(NCCC[N+](O-))(C)C(=O)=(O)C(F)(F)C(F)(F)C(F)(F)C(F)(F)F                                   | -7.26 | 24.32 | 2.52 | P | OUT |
| QL04499 | perfluoroalkanesulfonamido quaternary ammonium, n=3         |            | S(NCCC[N+](C)(C)C(=O)=(O)C(F)(F)C(F)(F)C(F)(F)F                                            | -6.63 | 18.92 | 2.42 | P | OUT |
| QL04500 | perfluoroalkanesulfonamido betaine A, n =6                  |            | S(NCCC[N+](CC(O)=O)(C)C(=O)=(O)C(F)(F)C(F)(F)C(F)(F)C(F)(F)C(F)(F)F                        | -8.44 | 26.53 | 2.95 | P | OUT |
| QL04501 | perfluoroalkanesulfonamido betaine A, n =5                  |            | S(NCCC[N+](CC(O)=O)(C)C(=O)=(O)C(F)(F)C(F)(F)C(F)(F)C(F)(F)C(F)(F)F                        | -8.07 | 23.91 | 2.87 | P | OUT |
| QL04502 | perfluoroalkanesulfonamido betaine A, n =4                  |            | S(NCCC[N+](CC(O)=O)(C)C(=O)=(O)C(F)(F)C(F)(F)C(F)(F)C(F)(F)F                               | -7.49 | 20.93 | 2.71 | P | OUT |
| QL04503 | perfluoroalkanesulfonamido betaine A, n =3                  |            | S(NCCC[N+](CC(O)=O)(C)C(=O)=(O)C(F)(F)C(F)(F)C(F)(F)F                                      | -7.04 | 17.50 | 2.62 | P | OUT |
| QL04504 | perfluoroalkanesulfonamido sulfonate betaine B, n=9         |            | S(NCCC[N+](CC(O)CS(=O)(O)=O)(C)C(=O)=(O)C(F)(F)C(F)(F)C(F)(F)C(F)(F)C(F)(F)C(F)(F)C(F)(F)F | -9.64 | 28.79 | 3.38 | P | OUT |
| QL04505 | perfluoroalkanesulfonamido sulfonate betaine B, n=8         |            | S(NCCC[N+](CC(O)CS(=O)(O)=O)(C)C(=O)=(O)C(F)(F)C(F)(F)C(F)(F)C(F)(F)C(F)(F)C(F)(F)F        | -9.26 | 26.98 | 3.27 | P | OUT |
| QL04506 | perfluoroalkanesulfonamido sulfonate betaine B, n=7         |            | S(NCCC[N+](CC(O)CS(=O)(O)=O)(C)C(=O)=(O)C(F)(F)C(F)(F)C(F)(F)C(F)(F)C(F)(F)C(F)(F)F        | -8.96 | 25.00 | 3.21 | P | OUT |
| QL04507 | perfluoroalkanesulfonamido sulfonate betaine B, n=6         |            | S(NCCC[N+](CC(O)CS(=O)(O)=O)(C)C(=O)=(O)C(F)(F)C(F)(F)C(F)(F)C(F)(F)C(F)(F)C(F)(F)F        | -8.52 | 22.81 | 3.08 | P | OUT |
| QL04508 | perfluoroalkanesulfonamido sulfonate betaine B, n=5         |            | S(NCCC[N+](CC(O)CS(=O)(O)=O)(C)C(=O)=(O)C(F)(F)C(F)(F)C(F)(F)C(F)(F)F                      | -8.17 | 20.37 | 3.01 | P | OUT |
| QL04509 | perfluoroalkanesulfonamido sulfonate betaine B, n=4         |            | S(NCCC[N+](CC(O)CS(=O)(O)=O)(C)C(=O)=(O)C(F)(F)C(F)(F)C(F)(F)C(F)(F)F                      | -7.65 | 17.65 | 2.87 | P | OUT |
| QL04510 | perfluoroalkanesulfonamido sulfonate betaine B, n=3         |            | S(NCCC[N+](CC(O)CS(=O)(O)=O)(C)C(=O)=(O)C(F)(F)C(F)(F)C(F)(F)F                             | -7.37 | 14.58 | 2.84 | P | OUT |
| QL04511 | perfluoroalkanesulfonamido betaine B, n=6                   |            | S(NCCC[N+](CCC(O)=O)(C)C(=O)=(O)C(F)(F)C(F)(F)C(F)(F)C(F)(F)C(F)(F)F                       | -8.59 | 25.00 | 3.05 | P | OUT |
| QL04512 | perfluoroalkanesulfonamido betaine B, n=5                   |            | S(NCCC[N+](CCC(O)=O)(C)C(=O)=(O)C(F)(F)C(F)(F)C(F)(F)C(F)(F)C(F)(F)F                       | -8.09 | 22.45 | 2.92 | P | OUT |
| QL04513 | perfluoroalkanesulfonamido betaine B, n=4                   |            | S(NCCC[N+](CCC(O)=O)(C)C(=O)=(O)C(F)(F)C(F)(F)C(F)(F)C(F)(F)F                              | -7.70 | 19.57 | 2.84 | P | OUT |
| QL04514 | perfluoroalkanesulfonamido betaine B, n=3                   |            | S(NCCC[N+](CCC(O)=O)(C)C(=O)=(O)C(F)(F)C(F)(F)C(F)(F)F                                     | -7.10 | 16.28 | 2.68 | P | OUT |
| QL04515 | perfluoroalkanesulfonamido quaternary ammonium diol C, n=6  |            | S(NCCC[N+](CCC(O)CO)(C)C(=O)=(O)C(F)(F)C(F)(F)C(F)(F)C(F)(F)C(F)(F)F                       | -8.55 | 22.81 | 3.10 | P | OUT |
| QL04516 | perfluoroalkanesulfonamido quaternary ammonium diol C, n=5  |            | S(NCCC[N+](CCC(O)CO)(C)C(=O)=(O)C(F)(F)C(F)(F)C(F)(F)C(F)(F)F                              | -8.22 | 20.37 | 3.03 | P | OUT |
| QL04517 | perfluoroalkanesulfonamido quaternary ammonium diol C, n=4  |            | S(NCCC[N+](CCC(O)CO)(C)C(=O)=(O)C(F)(F)C(F)(F)C(F)(F)C(F)(F)F                              | -7.70 | 17.65 | 2.89 | P | OUT |
| QL04518 | perfluoroalkanesulfonamido sulfonate betaine A, n=8         |            | S(NCCC[N+](CCCS(=O)(O)=O)(O)=O)(C)C(=O)=(O)C(F)(F)C(F)(F)C(F)(F)C(F)(F)C(F)(F)C(F)(F)F     | -9.29 | 27.42 | 3.27 | P | OUT |
| QL04519 | perfluoroalkanesulfonamido sulfonate betaine A, n=7         |            | S(NCCC[N+](CCCS(=O)(O)=O)(O)=O)(C)C(=O)=(O)C(F)(F)C(F)(F)C(F)(F)C(F)(F)C(F)(F)F            | -8.99 | 25.42 | 3.21 | P | OUT |
| QL04520 | perfluoroalkanesulfonamido sulfonate betaine A, n=6         |            | S(NCCC[N+](CCCS(=O)(O)=O)(O)=O)(C)C(=O)=(O)C(F)(F)C(F)(F)C(F)(F)C(F)(F)C(F)(F)F            | -8.55 | 23.21 | 3.09 | P | OUT |
| QL04521 | perfluoroalkanesulfonamido sulfonate betaine A, n=5         |            | S(NCCC[N+](CCCS(=O)(O)=O)(O)=O)(C)C(=O)=(O)C(F)(F)C(F)(F)C(F)(F)C(F)(F)F                   | -8.21 | 20.75 | 3.01 | P | OUT |
| QL04522 | perfluoroalkanesulfonamido sulfonate betaine A, n=4         |            | S(NCCC[N+](CCCS(=O)(O)=O)(O)=O)(C)C(=O)=(O)C(F)(F)C(F)(F)C(F)(F)C(F)(F)F                   | -7.68 | 18.00 | 2.87 | P | OUT |
| QL04523 | perfluoroalkanesulfonamido sulfonate betaine A, n=3         |            | S(NCCC[N+](CCCS(=O)(O)=O)(O)=O)(C)C(=O)=(O)C(F)(F)C(F)(F)C(F)(F)F                          | -7.41 | 14.89 | 2.85 | P | OUT |
| QL04524 | perfluoroalkanesulfonamido sulfonate betaine C, n=6         |            | S(NCCC[N+](CCCS(=O)(O)=O)(O)=O)(C)CCO(=O)=(O)C(F)(F)C(F)(F)C(F)(F)C(F)(F)C(F)(F)F          | -8.44 | 21.67 | 3.08 | P | OUT |
| QL04525 | perfluoroalkanesulfonamido sulfonate betaine C, n=5         |            | S(NCCC[N+](CCCS(=O)(O)=O)(O)=O)(C)CCO(=O)=(O)C(F)(F)C(F)(F)C(F)(F)C(F)(F)F                 | -8.10 | 19.30 | 3.01 | P | OUT |
| QL04526 | perfluoroalkanesulfonamido sulfonate betaine C, n=4         |            | S(NCCC[N+](CCCS(=O)(O)=O)(O)=O)(C)CCO(=O)=(O)C(F)(F)C(F)(F)C(F)(F)C(F)(F)F                 | -7.58 | 16.67 | 2.87 | P | OUT |
| QL04527 | perfluoroalkanesulfonamido quaternary ammonium alcohol, n=8 |            | S(NCCC[N+](CCO)(C)C(=O)=(O)C(F)(F)C(F)(F)C(F)(F)C(F)(F)C(F)(F)C(F)(F)F                     | -9.10 | 30.36 | 3.12 | P | OUT |
| QL04528 | perfluoroalkanesulfonamido quaternary ammonium alcohol, n=7 |            | S(NCCC[N+](CCO)(C)C(=O)=(O)C(F)(F)C(F)(F)C(F)(F)C(F)(F)C(F)(F)C(F)(F)F                     | -8.89 | 28.30 | 3.09 | P | OUT |
| QL04529 | perfluoroalkanesulfonamido quaternary ammonium alcohol, n=6 |            | S(NCCC[N+](CCO)(C)C(=O)=(O)C(F)(F)C(F)(F)C(F)(F)C(F)(F)C(F)(F)F                            | -8.41 | 26.00 | 2.95 | P | OUT |
| QL04530 | perfluoroalkanesulfonamido quaternary ammonium alcohol, n=5 |            | S(NCCC[N+](CCO)(C)C(=O)=(O)C(F)(F)C(F)(F)C(F)(F)C(F)(F)F                                   | -8.05 | 23.40 | 2.87 | P | OUT |
| QL04531 | perfluoroalkanesulfonamido quaternary ammonium alcohol, n=4 |            | S(NCCC[N+](CCO)(C)C(=O)=(O)C(F)(F)C(F)(F)C(F)(F)C(F)(F)F                                   | -7.47 | 20.45 | 2.72 | P | OUT |
| QL04532 | perfluoroalkanesulfonamido quaternary ammonium alcohol, n=3 |            | S(NCCC[N+](CCO)(C)C(=O)=(O)C(F)(F)C(F)(F)C(F)(F)F                                          | -7.03 | 17.07 | 2.63 | P | OUT |
| QL04533 | perfluoroalkanesulfonamido quaternary ammonium alcohol, n=2 |            | S(NCCC[N+](CCO)(C)C(=O)=(O)C(F)(F)C(F)(F)F                                                 | -6.32 | 13.16 | 2.45 | P | OUT |
| QL04534 | perfluoropropanesulfonamido amine, n =3                     |            | S(NCCCN(C)C(=O)=(O)C(F)(F)C(F)(F)F                                                         | -6.85 | 21.21 | 2.44 | P | OUT |
| QL04535 | perfluoropropanesulfonamido sulfonic acid, n=6              |            | S(NCCCS(=O)(O)=O)(O)=O)(O)C(F)(F)C(F)(F)C(F)(F)C(F)(F)C(F)(F)F                             | -8.45 | 34.21 | 2.74 | P | IN  |
| QL04536 | perfluoropropanesulfonamido sulfonic acid, n=5              |            | S(NCCCS(=O)(O)=O)(O)=O)(O)C(F)(F)C(F)(F)C(F)(F)C(F)(F)F                                    | -8.16 | 31.43 | 2.70 | P | IN  |
| QL04537 | perfluoropropanesulfonamido sulfonic acid, n=4              |            | S(NCCCS(=O)(O)=O)(O)=O)(O)C(F)(F)C(F)(F)C(F)(F)F                                           | -7.51 | 28.13 | 2.52 | P | OUT |
| QL04538 | perfluoropropanesulfonamido sulfonic acid, n=3              |            | S(NCCCS(=O)(O)=O)(O)=O)(O)C(F)(F)C(F)(F)F                                                  | -6.98 | 24.14 | 2.42 | P | OUT |
