# Supplementary material for: How the Structure of Per- and Polyfluoroalkyl Substances (PFAS) Influences Their Binding Potency to the Peroxisome Proliferator-Activated and Thyroid Hormone Receptors—An In Silico Screening Study
Source: MDPI journal article supplement (doi:10.3390/molecules28020479), 2023-01-04
Supplement: s1 [file s1]

[illegible]







[illegible]



|         |                                                                                                                    |              |                                                                                                                                                                                                                                                                                                                                                                                                                                                                                                                                                                                                                                                                                                                                                                                                                                                                                                                                                                                                                                                                                                                                                                                                                                                                                                                                                                                                                                                                                                                                                                                                                                                                                                                                                                                                                                                                                                                                                                                                                                                                                                                                                                                                                                                                                                                                                                                                                                                                                                                                                                                                                                                                                                                                                                                                                                                                                                                                                                                                                                                                                                                                                                                                                                                                                                                                                                                                                                                                                                                                                                                                                                                                                                                                                                                                                                                                                                                                                                                                                                                                                                                                                                                                                                                                                                                                                                                                                                                                                                                                                                                                                                                                                                                                                                                                                                                                                                                                                                                                                                                                                                                                                                 |       |       |      |   |     |
|---------|--------------------------------------------------------------------------------------------------------------------|--------------|-----------------------------------------------------------------------------------------------------------------------------------------------------------------------------------------------------------------------------------------------------------------------------------------------------------------------------------------------------------------------------------------------------------------------------------------------------------------------------------------------------------------------------------------------------------------------------------------------------------------------------------------------------------------------------------------------------------------------------------------------------------------------------------------------------------------------------------------------------------------------------------------------------------------------------------------------------------------------------------------------------------------------------------------------------------------------------------------------------------------------------------------------------------------------------------------------------------------------------------------------------------------------------------------------------------------------------------------------------------------------------------------------------------------------------------------------------------------------------------------------------------------------------------------------------------------------------------------------------------------------------------------------------------------------------------------------------------------------------------------------------------------------------------------------------------------------------------------------------------------------------------------------------------------------------------------------------------------------------------------------------------------------------------------------------------------------------------------------------------------------------------------------------------------------------------------------------------------------------------------------------------------------------------------------------------------------------------------------------------------------------------------------------------------------------------------------------------------------------------------------------------------------------------------------------------------------------------------------------------------------------------------------------------------------------------------------------------------------------------------------------------------------------------------------------------------------------------------------------------------------------------------------------------------------------------------------------------------------------------------------------------------------------------------------------------------------------------------------------------------------------------------------------------------------------------------------------------------------------------------------------------------------------------------------------------------------------------------------------------------------------------------------------------------------------------------------------------------------------------------------------------------------------------------------------------------------------------------------------------------------------------------------------------------------------------------------------------------------------------------------------------------------------------------------------------------------------------------------------------------------------------------------------------------------------------------------------------------------------------------------------------------------------------------------------------------------------------------------------------------------------------------------------------------------------------------------------------------------------------------------------------------------------------------------------------------------------------------------------------------------------------------------------------------------------------------------------------------------------------------------------------------------------------------------------------------------------------------------------------------------------------------------------------------------------------------------------------------------------------------------------------------------------------------------------------------------------------------------------------------------------------------------------------------------------------------------------------------------------------------------------------------------------------------------------------------------------------------------------------------------------------------------------------------|-------|-------|------|---|-----|
| QL00176 | Potassium perfluoropentanesulfonate                                                                                | 3872-25-1    | [K+].[O-].[S](=O)(=O)C(F)(F)C(F)(F)C(F)(F)C(F)(F)F                                                                                                                                                                                                                                                                                                                                                                                                                                                                                                                                                                                                                                                                                                                                                                                                                                                                                                                                                                                                                                                                                                                                                                                                                                                                                                                                                                                                                                                                                                                                                                                                                                                                                                                                                                                                                                                                                                                                                                                                                                                                                                                                                                                                                                                                                                                                                                                                                                                                                                                                                                                                                                                                                                                                                                                                                                                                                                                                                                                                                                                                                                                                                                                                                                                                                                                                                                                                                                                                                                                                                                                                                                                                                                                                                                                                                                                                                                                                                                                                                                                                                                                                                                                                                                                                                                                                                                                                                                                                                                                                                                                                                                                                                                                                                                                                                                                                                                                                                                                                                                                                                                              | -7.58 | 52.38 | 2.08 | P | IN  |
| QL00177 | Potassium 1,1,2,2,3,3,4,4,4-nonafluorobutane-1-sulphonate                                                          | 29420-49-3   | [K+].[O-].[S](=O)(=O)C(F)(F)C(F)(F)C(F)(F)C(F)F                                                                                                                                                                                                                                                                                                                                                                                                                                                                                                                                                                                                                                                                                                                                                                                                                                                                                                                                                                                                                                                                                                                                                                                                                                                                                                                                                                                                                                                                                                                                                                                                                                                                                                                                                                                                                                                                                                                                                                                                                                                                                                                                                                                                                                                                                                                                                                                                                                                                                                                                                                                                                                                                                                                                                                                                                                                                                                                                                                                                                                                                                                                                                                                                                                                                                                                                                                                                                                                                                                                                                                                                                                                                                                                                                                                                                                                                                                                                                                                                                                                                                                                                                                                                                                                                                                                                                                                                                                                                                                                                                                                                                                                                                                                                                                                                                                                                                                                                                                                                                                                                                                                 | -7.27 | 50.00 | 2.00 | P | IN  |
| QL00178 | Potassium 1,1,2,2,3,3,4,4-octafluorobutane-1-sulphonate                                                            | 70259-85-7   | [K+].[O-].[S](=O)(=O)C(F)(F)C(F)(F)C(F)(F)C(F)F                                                                                                                                                                                                                                                                                                                                                                                                                                                                                                                                                                                                                                                                                                                                                                                                                                                                                                                                                                                                                                                                                                                                                                                                                                                                                                                                                                                                                                                                                                                                                                                                                                                                                                                                                                                                                                                                                                                                                                                                                                                                                                                                                                                                                                                                                                                                                                                                                                                                                                                                                                                                                                                                                                                                                                                                                                                                                                                                                                                                                                                                                                                                                                                                                                                                                                                                                                                                                                                                                                                                                                                                                                                                                                                                                                                                                                                                                                                                                                                                                                                                                                                                                                                                                                                                                                                                                                                                                                                                                                                                                                                                                                                                                                                                                                                                                                                                                                                                                                                                                                                                                                                 | -6.99 | 44.44 | 2.02 | P | IN  |
| QL00179 | Potassium 1,1,2,2-tetrafluoro-2-[(1,1,1,2,2,3,3-hexafluoro-3-(pentafluoroethoxy)propan-2-yl)oxy]ethane-1-sulfonate | 70755-50-9   | [K+].[O-].[S](=O)(=O)C(F)(F)C(F)OC(F)(C(F)F)C(F)F)OC(F)(F)C(F)F)                                                                                                                                                                                                                                                                                                                                                                                                                                                                                                                                                                                                                                                                                                                                                                                                                                                                                                                                                                                                                                                                                                                                                                                                                                                                                                                                                                                                                                                                                                                                                                                                                                                                                                                                                                                                                                                                                                                                                                                                                                                                                                                                                                                                                                                                                                                                                                                                                                                                                                                                                                                                                                                                                                                                                                                                                                                                                                                                                                                                                                                                                                                                                                                                                                                                                                                                                                                                                                                                                                                                                                                                                                                                                                                                                                                                                                                                                                                                                                                                                                                                                                                                                                                                                                                                                                                                                                                                                                                                                                                                                                                                                                                                                                                                                                                                                                                                                                                                                                                                                                                                                                | -8.59 | 51.72 | 2.56 | P | IN  |
| QL00180 | Potassium 9-chlorohexadecafluoro-3-oxanonane-1-sulfonate                                                           | 73606-19-6   | [K+].[O-].[S](=O)(=O)C(F)(F)C(F)OC(F)(F)C(F)(F)C(F)(F)C(F)(F)C(F)Cl                                                                                                                                                                                                                                                                                                                                                                                                                                                                                                                                                                                                                                                                                                                                                                                                                                                                                                                                                                                                                                                                                                                                                                                                                                                                                                                                                                                                                                                                                                                                                                                                                                                                                                                                                                                                                                                                                                                                                                                                                                                                                                                                                                                                                                                                                                                                                                                                                                                                                                                                                                                                                                                                                                                                                                                                                                                                                                                                                                                                                                                                                                                                                                                                                                                                                                                                                                                                                                                                                                                                                                                                                                                                                                                                                                                                                                                                                                                                                                                                                                                                                                                                                                                                                                                                                                                                                                                                                                                                                                                                                                                                                                                                                                                                                                                                                                                                                                                                                                                                                                                                                             | -8.93 | 54.84 | 2.63 | P | IN  |
| QL00181 | Perfluoro-2-(hexyloxy)ethane-1-sulfonic acid potassium salt                                                        | 68136-88-9   | [K+].[O-].[S](=O)(=O)C(F)(F)C(F)OC(F)(F)C(F)(F)C(F)(F)C(F)(F)F                                                                                                                                                                                                                                                                                                                                                                                                                                                                                                                                                                                                                                                                                                                                                                                                                                                                                                                                                                                                                                                                                                                                                                                                                                                                                                                                                                                                                                                                                                                                                                                                                                                                                                                                                                                                                                                                                                                                                                                                                                                                                                                                                                                                                                                                                                                                                                                                                                                                                                                                                                                                                                                                                                                                                                                                                                                                                                                                                                                                                                                                                                                                                                                                                                                                                                                                                                                                                                                                                                                                                                                                                                                                                                                                                                                                                                                                                                                                                                                                                                                                                                                                                                                                                                                                                                                                                                                                                                                                                                                                                                                                                                                                                                                                                                                                                                                                                                                                                                                                                                                                                                  | -8.93 | 54.84 | 2.63 | P | IN  |
| QL00182 | Potassium 1,1,2,2-tetrafluoro-2-(pentafluoroethoxy)ethane-1-sulfonate                                              | 117205-07-9  | [K+].[O-].[S](=O)(=O)C(F)(F)C(F)OC(F)(F)C(F)F)                                                                                                                                                                                                                                                                                                                                                                                                                                                                                                                                                                                                                                                                                                                                                                                                                                                                                                                                                                                                                                                                                                                                                                                                                                                                                                                                                                                                                                                                                                                                                                                                                                                                                                                                                                                                                                                                                                                                                                                                                                                                                                                                                                                                                                                                                                                                                                                                                                                                                                                                                                                                                                                                                                                                                                                                                                                                                                                                                                                                                                                                                                                                                                                                                                                                                                                                                                                                                                                                                                                                                                                                                                                                                                                                                                                                                                                                                                                                                                                                                                                                                                                                                                                                                                                                                                                                                                                                                                                                                                                                                                                                                                                                                                                                                                                                                                                                                                                                                                                                                                                                                                                  | -7.31 | 47.37 | 2.09 | P | IN  |
| QL00183 | Cyclohexanesulfonic acid, decafluoro(trifluoromethyl)-, potassium salt (11)                                        | 68156-07-0   | [K+].[O-].[S](=O)(=O)C1(C(F)(F)C(F)(F)C(F)(F)C(F)(F)C1F)                                                                                                                                                                                                                                                                                                                                                                                                                                                                                                                                                                                                                                                                                                                                                                                                                                                                                                                                                                                                                                                                                                                                                                                                                                                                                                                                                                                                                                                                                                                                                                                                                                                                                                                                                                                                                                                                                                                                                                                                                                                                                                                                                                                                                                                                                                                                                                                                                                                                                                                                                                                                                                                                                                                                                                                                                                                                                                                                                                                                                                                                                                                                                                                                                                                                                                                                                                                                                                                                                                                                                                                                                                                                                                                                                                                                                                                                                                                                                                                                                                                                                                                                                                                                                                                                                                                                                                                                                                                                                                                                                                                                                                                                                                                                                                                                                                                                                                                                                                                                                                                                                                        | -6.72 | 52.00 | 1.70 | P | IN  |
| QL00184 | Potassium 1,2,2,3,3,4,4,5,5,6,6-decafluoro-4-(pentafluoroethyl)cyclohexanesulphonate                               | 335-24-0     | [K+].[O-].[S](=O)(=O)C1(F)C(F)C(F)C(F)C(F)C(F)(F)C(F)C1F                                                                                                                                                                                                                                                                                                                                                                                                                                                                                                                                                                                                                                                                                                                                                                                                                                                                                                                                                                                                                                                                                                                                                                                                                                                                                                                                                                                                                                                                                                                                                                                                                                                                                                                                                                                                                                                                                                                                                                                                                                                                                                                                                                                                                                                                                                                                                                                                                                                                                                                                                                                                                                                                                                                                                                                                                                                                                                                                                                                                                                                                                                                                                                                                                                                                                                                                                                                                                                                                                                                                                                                                                                                                                                                                                                                                                                                                                                                                                                                                                                                                                                                                                                                                                                                                                                                                                                                                                                                                                                                                                                                                                                                                                                                                                                                                                                                                                                                                                                                                                                                                                                        | -8.27 | 53.57 | 2.36 | P | IN  |
| QL00185 | Potassium undecafluorocyclohexanesulphonate                                                                        | 3107-18-4    | [K+].[O-].[S](=O)(=O)C1(F)C(F)C(F)C(F)C(F)C1F                                                                                                                                                                                                                                                                                                                                                                                                                                                                                                                                                                                                                                                                                                                                                                                                                                                                                                                                                                                                                                                                                                                                                                                                                                                                                                                                                                                                                                                                                                                                                                                                                                                                                                                                                                                                                                                                                                                                                                                                                                                                                                                                                                                                                                                                                                                                                                                                                                                                                                                                                                                                                                                                                                                                                                                                                                                                                                                                                                                                                                                                                                                                                                                                                                                                                                                                                                                                                                                                                                                                                                                                                                                                                                                                                                                                                                                                                                                                                                                                                                                                                                                                                                                                                                                                                                                                                                                                                                                                                                                                                                                                                                                                                                                                                                                                                                                                                                                                                                                                                                                                                                                   | -6.55 | 50.00 | 1.67 | P | IN  |
| QL00186 | Potassium 3,3,4,4,5,5,6,6,7,7,8,8,8-tridecafluorooctanesulphonate                                                  | 59587-38-1   | [K+].[O-].[S](=O)(=O)CCCC(F)(F)C(F)C(F)(F)C(F)(F)F                                                                                                                                                                                                                                                                                                                                                                                                                                                                                                                                                                                                                                                                                                                                                                                                                                                                                                                                                                                                                                                                                                                                                                                                                                                                                                                                                                                                                                                                                                                                                                                                                                                                                                                                                                                                                                                                                                                                                                                                                                                                                                                                                                                                                                                                                                                                                                                                                                                                                                                                                                                                                                                                                                                                                                                                                                                                                                                                                                                                                                                                                                                                                                                                                                                                                                                                                                                                                                                                                                                                                                                                                                                                                                                                                                                                                                                                                                                                                                                                                                                                                                                                                                                                                                                                                                                                                                                                                                                                                                                                                                                                                                                                                                                                                                                                                                                                                                                                                                                                                                                                                                              | -8.16 | 43.33 | 2.58 | P | IN  |
| QL00187 | Potassium 5,5,6,6,7,7,8,8,8-nonafluorooctane-1-sulfonate                                                           | 1604816-60-5 | [K+].[O-].[S](=O)(=O)CCCCC(F)(F)C(F)C(F)(F)F                                                                                                                                                                                                                                                                                                                                                                                                                                                                                                                                                                                                                                                                                                                                                                                                                                                                                                                                                                                                                                                                                                                                                                                                                                                                                                                                                                                                                                                                                                                                                                                                                                                                                                                                                                                                                                                                                                                                                                                                                                                                                                                                                                                                                                                                                                                                                                                                                                                                                                                                                                                                                                                                                                                                                                                                                                                                                                                                                                                                                                                                                                                                                                                                                                                                                                                                                                                                                                                                                                                                                                                                                                                                                                                                                                                                                                                                                                                                                                                                                                                                                                                                                                                                                                                                                                                                                                                                                                                                                                                                                                                                                                                                                                                                                                                                                                                                                                                                                                                                                                                                                                                    | -7.37 | 30.00 | 2.57 | P | OUT |
| QL00188 | Potassium 3,3,4,4,5,5,6,6,7,7,8,8,9,9,10,10,11,11,12,12-dihexacosaflluorododecyl sulfate                           | 1262446-14-9 | [K+].[O-].[S](=O)(=O)OCCCC(F)(F)C(F)C(F)C(F)C(F)C(F)C(F)C(F)C(F)C(F)C(F)C(F)C(F)F                                                                                                                                                                                                                                                                                                                                                                                                                                                                                                                                                                                                                                                                                                                                                                                                                                                                                                                                                                                                                                                                                                                                                                                                                                                                                                                                                                                                                                                                                                                                                                                                                                                                                                                                                                                                                                                                                                                                                                                                                                                                                                                                                                                                                                                                                                                                                                                                                                                                                                                                                                                                                                                                                                                                                                                                                                                                                                                                                                                                                                                                                                                                                                                                                                                                                                                                                                                                                                                                                                                                                                                                                                                                                                                                                                                                                                                                                                                                                                                                                                                                                                                                                                                                                                                                                                                                                                                                                                                                                                                                                                                                                                                                                                                                                                                                                                                                                                                                                                                                                                                                               | -9.45 | 48.84 | 3.03 | P | OUT |
| QL00189 | Potassium 3,3,4,4,5,5,6,6,7,7,8,8,9,9,10,10,10-hepta-decafluorodecyl sulfate                                       | 1262446-13-8 | [K+].[O-].[S](=O)(=O)OCCCC(F)(F)C(F)C(F)C(F)C(F)C(F)C(F)C(F)C(F)F                                                                                                                                                                                                                                                                                                                                                                                                                                                                                                                                                                                                                                                                                                                                                                                                                                                                                                                                                                                                                                                                                                                                                                                                                                                                                                                                                                                                                                                                                                                                                                                                                                                                                                                                                                                                                                                                                                                                                                                                                                                                                                                                                                                                                                                                                                                                                                                                                                                                                                                                                                                                                                                                                                                                                                                                                                                                                                                                                                                                                                                                                                                                                                                                                                                                                                                                                                                                                                                                                                                                                                                                                                                                                                                                                                                                                                                                                                                                                                                                                                                                                                                                                                                                                                                                                                                                                                                                                                                                                                                                                                                                                                                                                                                                                                                                                                                                                                                                                                                                                                                                                               | -8.89 | 45.95 | 2.85 | P | IN  |
| QL00190 | 3-[(Perfluorooctane-1-sulfonyl)amino]-N,N-dimethylpropan-1-amine N-oxide potassium                                 | 178094-69-4  | [K+].CN[N+](C)[O-]CCC[N-].[S](=O)(=O)C(F)(F)C(F)C(F)C(F)C(F)F                                                                                                                                                                                                                                                                                                                                                                                                                                                                                                                                                                                                                                                                                                                                                                                                                                                                                                                                                                                                                                                                                                                                                                                                                                                                                                                                                                                                                                                                                                                                                                                                                                                                                                                                                                                                                                                                                                                                                                                                                                                                                                                                                                                                                                                                                                                                                                                                                                                                                                                                                                                                                                                                                                                                                                                                                                                                                                                                                                                                                                                                                                                                                                                                                                                                                                                                                                                                                                                                                                                                                                                                                                                                                                                                                                                                                                                                                                                                                                                                                                                                                                                                                                                                                                                                                                                                                                                                                                                                                                                                                                                                                                                                                                                                                                                                                                                                                                                                                                                                                                                                                                   | -8.65 | 34.69 | 3.03 | P | OUT |
| QL00191 | 3-[(Perfluoroheptane-1-sulfonyl)amino]-N,N-dimethylpropan-1-amine N-oxide potassium salt                           | 178094-70-7  | [K+].CN[N+](C)[O-]CCCC[N-].[S](=O)(=O)C(F)(F)C(F)C(F)C(F)C(F)F                                                                                                                                                                                                                                                                                                                                                                                                                                                                                                                                                                                                                                                                                                                                                                                                                                                                                                                                                                                                                                                                                                                                                                                                                                                                                                                                                                                                                                                                                                                                                                                                                                                                                                                                                                                                                                                                                                                                                                                                                                                                                                                                                                                                                                                                                                                                                                                                                                                                                                                                                                                                                                                                                                                                                                                                                                                                                                                                                                                                                                                                                                                                                                                                                                                                                                                                                                                                                                                                                                                                                                                                                                                                                                                                                                                                                                                                                                                                                                                                                                                                                                                                                                                                                                                                                                                                                                                                                                                                                                                                                                                                                                                                                                                                                                                                                                                                                                                                                                                                                                                                                                  | -8.45 | 32.61 | 3.00 | P | OUT |
| QL00192 | 3-[(Perfluorohexane-1-sulfonyl)amino]-N,N-dimethylpropan-1-amine N-oxide potassium salt                            | 178094-71-8  | [K+].CN[N+](C)[O-]CCCC[N-].[S](=O)(=O)C(F)(F)C(F)C(F)C(F)F                                                                                                                                                                                                                                                                                                                                                                                                                                                                                                                                                                                                                                                                                                                                                                                                                                                                                                                                                                                                                                                                                                                                                                                                                                                                                                                                                                                                                                                                                                                                                                                                                                                                                                                                                                                                                                                                                                                                                                                                                                                                                                                                                                                                                                                                                                                                                                                                                                                                                                                                                                                                                                                                                                                                                                                                                                                                                                                                                                                                                                                                                                                                                                                                                                                                                                                                                                                                                                                                                                                                                                                                                                                                                                                                                                                                                                                                                                                                                                                                                                                                                                                                                                                                                                                                                                                                                                                                                                                                                                                                                                                                                                                                                                                                                                                                                                                                                                                                                                                                                                                                                                      | -8.00 | 30.23 | 2.86 | P | OUT |
| QL00193 | 3-[(Perfluoropentane-1-sulfonyl)amino]-N,N-dimethylpropan-1-amine N-oxide potassium salt                           | 178094-72-9  | [K+].CN[N+](C)[O-]CCCC[N-].[S](=O)(=O)C(F)(F)C(F)C(F)F                                                                                                                                                                                                                                                                                                                                                                                                                                                                                                                                                                                                                                                                                                                                                                                                                                                                                                                                                                                                                                                                                                                                                                                                                                                                                                                                                                                                                                                                                                                                                                                                                                                                                                                                                                                                                                                                                                                                                                                                                                                                                                                                                                                                                                                                                                                                                                                                                                                                                                                                                                                                                                                                                                                                                                                                                                                                                                                                                                                                                                                                                                                                                                                                                                                                                                                                                                                                                                                                                                                                                                                                                                                                                                                                                                                                                                                                                                                                                                                                                                                                                                                                                                                                                                                                                                                                                                                                                                                                                                                                                                                                                                                                                                                                                                                                                                                                                                                                                                                                                                                                                                          | -7.77 | 27.50 | 2.82 | P | OUT |
| QL00194 | 3-[(Perfluorobutane-1-sulfonyl)amino]-N,N-dimethylpropan-1-amine N-oxide potassium salt                            | 178094-73-0  | [K+].CN[N+](C)[O-]CCCC[N-].[S](=O)(=O)C(F)(F)C(F)C(F)F                                                                                                                                                                                                                                                                                                                                                                                                                                                                                                                                                                                                                                                                                                                                                                                                                                                                                                                                                                                                                                                                                                                                                                                                                                                                                                                                                                                                                                                                                                                                                                                                                                                                                                                                                                                                                                                                                                                                                                                                                                                                                                                                                                                                                                                                                                                                                                                                                                                                                                                                                                                                                                                                                                                                                                                                                                                                                                                                                                                                                                                                                                                                                                                                                                                                                                                                                                                                                                                                                                                                                                                                                                                                                                                                                                                                                                                                                                                                                                                                                                                                                                                                                                                                                                                                                                                                                                                                                                                                                                                                                                                                                                                                                                                                                                                                                                                                                                                                                                                                                                                                                                          | -7.24 | 24.32 | 2.66 | P | OUT |
| QL00195 | Cyclohexanesulfonic acid, decafluoro(pentafluoroethyl)-, potassium salt (TSCA, DSL, AICS)                          | 67584-42-3   | [K+].C1(C(C(C(C(C1F)F)F)F)F)F(S(=O)=O)[O-]C(C(F)F)F                                                                                                                                                                                                                                                                                                                                                                                                                                                                                                                                                                                                                                                                                                                                                                                                                                                                                                                                                                                                                                                                                                                                                                                                                                                                                                                                                                                                                                                                                                                                                                                                                                                                                                                                                                                                                                                                                                                                                                                                                                                                                                                                                                                                                                                                                                                                                                                                                                                                                                                                                                                                                                                                                                                                                                                                                                                                                                                                                                                                                                                                                                                                                                                                                                                                                                                                                                                                                                                                                                                                                                                                                                                                                                                                                                                                                                                                                                                                                                                                                                                                                                                                                                                                                                                                                                                                                                                                                                                                                                                                                                                                                                                                                                                                                                                                                                                                                                                                                                                                                                                                                                             | -7.49 | 53.57 | 2.01 | P | IN  |
| QL00196 | Potassium N-propyl-N-[(tridecafluorohexyl)sulphonyl]glycinate                                                      | 85665-66-3   | [K+].CCCC(CC[O-])O[S](=O)(=O)C(F)(F)C(F)C(F)C(F)C(F)F                                                                                                                                                                                                                                                                                                                                                                                                                                                                                                                                                                                                                                                                                                                                                                                                                                                                                                                                                                                                                                                                                                                                                                                                                                                                                                                                                                                                                                                                                                                                                                                                                                                                                                                                                                                                                                                                                                                                                                                                                                                                                                                                                                                                                                                                                                                                                                                                                                                                                                                                                                                                                                                                                                                                                                                                                                                                                                                                                                                                                                                                                                                                                                                                                                                                                                                                                                                                                                                                                                                                                                                                                                                                                                                                                                                                                                                                                                                                                                                                                                                                                                                                                                                                                                                                                                                                                                                                                                                                                                                                                                                                                                                                                                                                                                                                                                                                                                                                                                                                                                                                                                           | -7.66 | 32.50 | 2.64 | P | OUT |
| QL00197 | Potassium N-[(hepta-decafluorooctyl)sulphonyl]-N-propylglycinate                                                   | 55910-10-6   | [K+].CCCC(CC[O-])O[S](=O)(=O)C(F)(F)C(F)C(F)C(F)C(F)C(F)F                                                                                                                                                                                                                                                                                                                                                                                                                                                                                                                                                                                                                                                                                                                                                                                                                                                                                                                                                                                                                                                                                                                                                                                                                                                                                                                                                                                                                                                                                                                                                                                                                                                                                                                                                                                                                                                                                                                                                                                                                                                                                                                                                                                                                                                                                                                                                                                                                                                                                                                                                                                                                                                                                                                                                                                                                                                                                                                                                                                                                                                                                                                                                                                                                                                                                                                                                                                                                                                                                                                                                                                                                                                                                                                                                                                                                                                                                                                                                                                                                                                                                                                                                                                                                                                                                                                                                                                                                                                                                                                                                                                                                                                                                                                                                                                                                                                                                                                                                                                                                                                                                                       | -8.38 | 36.96 | 2.85 | P | OUT |
| QL00198 | Potassium N-ethyl-N-[(hepta-decafluorooctyl)sulphonyl]glycinate                                                    | 2991-51-7    | [K+].CCN(CC[O-])[O-].[S](=O)(=O)C(F)(F)C(F)C(F)C(F)C(F)F                                                                                                                                                                                                                                                                                                                                                                                                                                                                                                                                                                                                                                                                                                                                                                                                                                                                                                                                                                                                                                                                                                                                                                                                                                                                                                                                                                                                                                                                                                                                                                                                                                                                                                                                                                                                                                                                                                                                                                                                                                                                                                                                                                                                                                                                                                                                                                                                                                                                                                                                                                                                                                                                                                                                                                                                                                                                                                                                                                                                                                                                                                                                                                                                                                                                                                                                                                                                                                                                                                                                                                                                                                                                                                                                                                                                                                                                                                                                                                                                                                                                                                                                                                                                                                                                                                                                                                                                                                                                                                                                                                                                                                                                                                                                                                                                                                                                                                                                                                                                                                                                                                        | -8.54 | 39.53 | 2.85 | P | IN  |
| QL00199 | Potassium N-ethyl-N-[(pentadecafluoroheptyl)sulphonyl]glycinate                                                    | 67584-62-7   | [K+].CCN(CC[O-])[O-].[S](=O)(=O)C(F)(F)C(F)C(F)C(F)C(F)F                                                                                                                                                                                                                                                                                                                                                                                                                                                                                                                                                                                                                                                                                                                                                                                                                                                                                                                                                                                                                                                                                                                                                                                                                                                                                                                                                                                                                                                                                                                                                                                                                                                                                                                                                                                                                                                                                                                                                                                                                                                                                                                                                                                                                                                                                                                                                                                                                                                                                                                                                                                                                                                                                                                                                                                                                                                                                                                                                                                                                                                                                                                                                                                                                                                                                                                                                                                                                                                                                                                                                                                                                                                                                                                                                                                                                                                                                                                                                                                                                                                                                                                                                                                                                                                                                                                                                                                                                                                                                                                                                                                                                                                                                                                                                                                                                                                                                                                                                                                                                                                                                                        | -8.31 | 37.50 | 2.81 | P | IN  |
| QL00200 | Potassium N-ethyl-N-[(tridecafluorohexyl)sulphonyl]glycinate                                                       | 67584-53-6   | [K+].CCN(CC[O-])[O-].[S](=O)(=O)C(F)(F)C(F)C(F)C(F)F                                                                                                                                                                                                                                                                                                                                                                                                                                                                                                                                                                                                                                                                                                                                                                                                                                                                                                                                                                                                                                                                                                                                                                                                                                                                                                                                                                                                                                                                                                                                                                                                                                                                                                                                                                                                                                                                                                                                                                                                                                                                                                                                                                                                                                                                                                                                                                                                                                                                                                                                                                                                                                                                                                                                                                                                                                                                                                                                                                                                                                                                                                                                                                                                                                                                                                                                                                                                                                                                                                                                                                                                                                                                                                                                                                                                                                                                                                                                                                                                                                                                                                                                                                                                                                                                                                                                                                                                                                                                                                                                                                                                                                                                                                                                                                                                                                                                                                                                                                                                                                                                                                            | -7.82 | 35.14 | 2.65 | P | OUT |
| QL00201 | Potassium N-ethyl-N-[(undecafluoropentyl)sulphonyl]glycinate                                                       | 67584-52-5   | [K+].CCN(CC[O-])[O-].[S](=O)(=O)C(F)(F)C(F)C(F)F                                                                                                                                                                                                                                                                                                                                                                                                                                                                                                                                                                                                                                                                                                                                                                                                                                                                                                                                                                                                                                                                                                                                                                                                                                                                                                                                                                                                                                                                                                                                                                                                                                                                                                                                                                                                                                                                                                                                                                                                                                                                                                                                                                                                                                                                                                                                                                                                                                                                                                                                                                                                                                                                                                                                                                                                                                                                                                                                                                                                                                                                                                                                                                                                                                                                                                                                                                                                                                                                                                                                                                                                                                                                                                                                                                                                                                                                                                                                                                                                                                                                                                                                                                                                                                                                                                                                                                                                                                                                                                                                                                                                                                                                                                                                                                                                                                                                                                                                                                                                                                                                                                                | -7.55 | 32.35 | 2.59 | P | OUT |
| QL00202 | Potassium N-ethyl-N-[(nonafluorobutyl)sulphonyl]glycinate                                                          | 67584-51-4   | [K+].CCN(CC[O-])[O-].[S](=O)(=O)C(F)(F)C(F)F                                                                                                                                                                                                                                                                                                                                                                                                                                                                                                                                                                                                                                                                                                                                                                                                                                                                                                                                                                                                                                                                                                                                                                                                                                                                                                                                                                                                                                                                                                                                                                                                                                                                                                                                                                                                                                                                                                                                                                                                                                                                                                                                                                                                                                                                                                                                                                                                                                                                                                                                                                                                                                                                                                                                                                                                                                                                                                                                                                                                                                                                                                                                                                                                                                                                                                                                                                                                                                                                                                                                                                                                                                                                                                                                                                                                                                                                                                                                                                                                                                                                                                                                                                                                                                                                                                                                                                                                                                                                                                                                                                                                                                                                                                                                                                                                                                                                                                                                                                                                                                                                                                                    | -6.94 | 29.03 | 2.40 | P | OUT |
| QL00203 | 1-[2-[Ethyl[[perfluorooctyl)sulfonyl]amino]ethyl] butanedioate potassium                                           | 92340-26-6   | [K+].CCN(CCC(=O)CCCC[O-])[O-].[S](=O)(=O)C(F)(F)C(F)C(F)C(F)F                                                                                                                                                                                                                                                                                                                                                                                                                                                                                                                                                                                                                                                                                                                                                                                                                                                                                                                                                                                                                                                                                                                                                                                                                                                                                                                                                                                                                                                                                                                                                                                                                                                                                                                                                                                                                                                                                                                                                                                                                                                                                                                                                                                                                                                                                                                                                                                                                                                                                                                                                                                                                                                                                                                                                                                                                                                                                                                                                                                                                                                                                                                                                                                                                                                                                                                                                                                                                                                                                                                                                                                                                                                                                                                                                                                                                                                                                                                                                                                                                                                                                                                                                                                                                                                                                                                                                                                                                                                                                                                                                                                                                                                                                                                                                                                                                                                                                                                                                                                                                                                                                                   | -9.09 | 30.91 | 3.33 | P | OUT |
| QL00204 | Potassium N-[(hepta-decafluorooctyl)sulphonyl]-N-methylglycinate                                                   | 70281-93-5   | [K+].CN(CCC(=O)[O-])[O-].[S](=O)(=O)C(F)(F)C(F)C(F)C(F)F                                                                                                                                                                                                                                                                                                                                                                                                                                                                                                                                                                                                                                                                                                                                                                                                                                                                                                                                                                                                                                                                                                                                                                                                                                                                                                                                                                                                                                                                                                                                                                                                                                                                                                                                                                                                                                                                                                                                                                                                                                                                                                                                                                                                                                                                                                                                                                                                                                                                                                                                                                                                                                                                                                                                                                                                                                                                                                                                                                                                                                                                                                                                                                                                                                                                                                                                                                                                                                                                                                                                                                                                                                                                                                                                                                                                                                                                                                                                                                                                                                                                                                                                                                                                                                                                                                                                                                                                                                                                                                                                                                                                                                                                                                                                                                                                                                                                                                                                                                                                                                                                                                        | -8.70 | 42.50 | 2.85 | P | IN  |
| QL00205 | Potassium N-[(perfluoro-7-methyloctyl)-2-hydroxypropyl]-N-methylaminoacetate                                       | 94159-89-4   | [K+].CN(CCC(=O)CC(F)(F)C(F)C(F)C(F)C(F)C(F)C(F)C(F)C(F)C(F)C(F)C(F)C(F)C(F)C(F)C(F)C(F)C(F)C(F)C(F)C(F)C(F)C(F)C(F)C(F)C(F)C(F)C(F)C(F)C(F)C(F)C(F)C(F)C(F)C(F)C(F)C(F)C(F)C(F)C(F)C(F)C(F)C(F)C(F)C(F)C(F)C(F)C(F)C(F)C(F)C(F)C(F)C(F)C(F)C(F)C(F)C(F)C(F)C(F)C(F)C(F)C(F)C(F)C(F)C(F)C(F)C(F)C(F)C(F)C(F)C(F)C(F)C(F)C(F)C(F)C(F)C(F)C(F)C(F)C(F)C(F)C(F)C(F)C(F)C(F)C(F)C(F)C(F)C(F)C(F)C(F)C(F)C(F)C(F)C(F)C(F)C(F)C(F)C(F)C(F)C(F)C(F)C(F)C(F)C(F)C(F)C(F)C(F)C(F)C(F)C(F)C(F)C(F)C(F)C(F)C(F)C(F)C(F)C(F)C(F)C(F)C(F)C(F)C(F)C(F)C(F)C(F)C(F)C(F)C(F)C(F)C(F)C(F)C(F)C(F)C(F)C(F)C(F)C(F)C(F)C(F)C(F)C(F)C(F)C(F)C(F)C(F)C(F)C(F)C(F)C(F)C(F)C(F)C(F)C(F)C(F)C(F)C(F)C(F)C(F)C(F)C(F)C(F)C(F)C(F)C(F)C(F)C(F)C(F)C(F)C(F)C(F)C(F)C(F)C(F)C(F)C(F)C(F)C(F)C(F)C(F)C(F)C(F)C(F)C(F)C(F)C(F)C(F)C(F)C(F)C(F)C(F)C(F)C(F)C(F)C(F)C(F)C(F)C(F)C(F)C(F)C(F)C(F)C(F)C(F)C(F)C(F)C(F)C(F)C(F)C(F)C(F)C(F)C(F)C(F)C(F)C(F)C(F)C(F)C(F)C(F)C(F)C(F)C(F)C(F)C(F)C(F)C(F)C(F)C(F)C(F)C(F)C(F)C(F)C(F)C(F)C(F)C(F)C(F)C(F)C(F)C(F)C(F)C(F)C(F)C(F)C(F)C(F)C(F)C(F)C(F)C(F)C(F)C(F)C(F)C(F)C(F)C(F)C(F)C(F)C(F)C(F)C(F)C(F)C(F)C(F)C(F)C(F)C(F)C(F)C(F)C(F)C(F)C(F)C(F)C(F)C(F)C(F)C(F)C(F)C(F)C(F)C(F)C(F)C(F)C(F)C(F)C(F)C(F)C(F)C(F)C(F)C(F)C(F)C(F)C(F)C(F)C(F)C(F)C(F)C(F)C(F)C(F)C(F)C(F)C(F)C(F)C(F)C(F)C(F)C(F)C(F)C(F)C(F)C(F)C(F)C(F)C(F)C(F)C(F)C(F)C(F)C(F)C(F)C(F)C(F)C(F)C(F)C(F)C(F)C(F)C(F)C(F)C(F)C(F)C(F)C(F)C(F)C(F)C(F)C(F)C(F)C(F)C(F)C(F)C(F)C(F)C(F)C(F)C(F)C(F)C(F)C(F)C(F)C(F)C(F)C(F)C(F)C(F)C(F)C(F)C(F)C(F)C(F)C(F)C(F)C(F)C(F)C(F)C(F)C(F)C(F)C(F)C(F)C(F)C(F)C(F)C(F)C(F)C(F)C(F)C(F)C(F)C(F)C(F)C(F)C(F)C(F)C(F)C(F)C(F)C(F)C(F)C(F)C(F)C(F)C(F)C(F)C(F)C(F)C(F)C(F)C(F)C(F)C(F)C(F)C(F)C(F)C(F)C(F)C(F)C(F)C(F)C(F)C(F)C(F)C(F)C(F)C(F)C(F)C(F)C(F)C(F)C(F)C(F)C(F)C(F)C(F)C(F)C(F)C(F)C(F)C(F)C(F)C(F)C(F)C(F)C(F)C(F)C(F)C(F)C(F)C(F)C(F)C(F)C(F)C(F)C(F)C(F)C(F)C(F)C(F)C(F)C(F)C(F)C(F)C(F)C(F)C(F)C(F)C(F)C(F)C(F)C(F)C(F)C(F)C(F)C(F)C(F)C(F)C(F)C(F)C(F)C(F)C(F)C(F)C(F)C(F)C(F)C(F)C(F)C(F)C(F)C(F)C(F)C(F)C(F)C(F)C(F)C(F)C(F)C(F)C(F)C(F)C(F)C(F)C(F)C(F)C(F)C(F)C(F)C(F)C(F)C(F)C(F)C(F)C(F)C(F)C(F)C(F)C(F)C(F)C(F)C(F)C(F)C(F)C(F)C(F)C(F)C(F)C(F)C(F)C(F)C(F)C(F)C(F)C(F)C(F)C(F)C(F)C(F)C(F)C(F)C(F)C(F)C(F)C(F)C(F)C(F)C(F)C(F)C(F)C(F)C(F)C(F)C(F)C(F)C(F)C(F)C(F)C(F)C(F)C(F)C(F)C(F)C(F)C(F)C(F)C(F)C(F)C(F)C(F)C(F)C(F)C(F)C(F)C(F)C(F)C(F)C(F)C(F)C(F)C(F)C(F)C(F)C(F)C(F)C(F)C(F)C(F)C(F)C(F)C(F)C(F)C(F)C(F)C(F)C(F)C(F)C(F)C(F)C(F)C(F)C(F)C(F)C(F)C(F)C(F)C(F)C(F)C(F)C(F)C(F)C(F)C(F)C(F)C(F)C(F)C(F)C(F)C(F)C(F)C(F)C(F)C(F)C(F)C(F)C(F)C(F)C(F)C(F)C(F)C(F)C(F)C(F)C(F)C(F)C(F)C(F)C(F)C(F)C(F)C(F)C(F)C(F)C(F)C(F)C(F)C(F)C(F)C(F)C(F)C(F)C(F)C(F)C(F)C(F)C(F)C(F)C(F)C(F)C(F)C(F)C(F)C(F)C(F)C(F)C(F)C(F)C(F)C(F)C(F)C(F)C(F)C(F)C(F)C(F)C(F)C(F)C(F)C(F)C(F)C(F)C(F)C(F)C(F)C(F)C(F)C(F)C(F)C(F)C(F)C(F)C(F)C(F)C(F)C(F)C(F)C(F)C(F)C(F)C(F)C(F)C(F)C(F)C(F)C(F)C(F)C(F)C(F)C(F)C(F)C(F)C(F)C(F)C(F)C(F)C(F)C(F)C(F)C(F)C(F)C(F)C(F)C(F)C(F)C(F)C(F)C(F)C(F)C(F)C(F)C(F)C(F)C(F)C(F)C(F)C(F)C(F)C(F)C(F)C(F)C(F)C(F)C(F)C(F)C(F)C(F)C(F)C(F)C(F)C(F)C(F)C(F)C(F)C(F)C(F)C(F)C(F)C(F)C(F)C(F)C(F)C(F)C(F)C(F)C(F)C(F)C(F)C(F)C(F)C(F)C(F)C(F)C(F)C(F)C(F)C(F)C(F)C(F)C(F)C(F)C(F)C(F)C(F)C(F)C(F)C(F)C(F)C(F)C(F)C(F)C(F)C(F)C(F)C(F)C(F)C(F)C(F)C(F)C(F)C(F)C(F)C(F)C(F)C(F)C(F)C(F)C(F)C(F)C(F)C(F)C(F)C(F)C(F)C(F)C(F)C(F)C(F)C(F)C(F)C(F)C(F)C(F)C(F)C(F)C(F)C(F)C(F)C(F)C(F)C(F)C(F)C(F)C(F)C(F)C(F)C(F)C(F)C(F)C(F)C(F)C(F)C(F)C(F)C(F)C(F)C(F)C(F)C(F)C(F)C(F)C(F)C(F)C(F)C(F)C(F)C(F)C(F)C(F)C(F)C(F)C(F)C(F)C(F)C(F)C(F)C(F)C(F)C(F)C(F)C(F)C(F)C(F)C(F)C(F)C(F)C(F)C(F)C(F)C(F)C(F)C(F)C(F)C(F)C(F)C(F)C(F)C(F)C(F)C(F)C(F)C(F)C(F)C(F)C(F)C(F)C(F)C(F)C(F)C(F)C(F)C(F)C(F)C(F)C(F)C(F)C(F)C(F)C(F)C(F)C(F)C(F)C(F)C(F)C(F)C(F)C(F)C(F)C(F)C(F)C(F)C(F)C(F)C(F)C(F)C(F)C(F)C(F)C(F)C(F)C(F)C(F)C(F)C(F)C(F)C(F)C(F)C(F)C(F)C(F)C(F)C(F)C(F)C(F)C(F)C(F)C(F)C(F)C(F)C(F)C(F)C(F)C(F)C(F)C(F)C(F)C(F)C(F)C(F)C(F)C(F)C(F)C(F)C(F)C(F)C(F)C(F)C(F)C(F)C(F)C(F)C(F)C(F)C(F)C(F)C(F)C(F)C(F)C(F)C(F)C(F)C(F)C(F)C(F)C(F)C(F)C(F)C(F)C(F)C(F)C(F)C(F)C(F)C(F)C(F)C(F)C(F)C(F)C(F)C(F)C(F)C(F)C(F)C(F)C(F)C(F)C(F)C(F)C(F)C(F)C(F)C(F)C(F)C(F)C(F)C(F)C(F)C(F)C(F)C(F)C(F)C(F)C(F)C(F)C(F)C(F)C(F)C(F)C(F)C(F)C(F)C(F)C(F)C(F)C(F)C(F)C(F)C(F)C(F)C(F)C(F)C(F)C(F)C(F)C(F)C(F)C(F)C(F)C(F)C(F)C(F)C(F)C(F)C(F)C(F)C(F)C(F)C(F)C(F)C(F)C(F)C(F)C(F)C(F)C(F)C(F)C(F)C(F)C(F)C(F)C(F)C(F)C(F)C(F)C(F)C(F)C(F)C(F)C(F)C(F)C(F)C(F)C(F)C(F)C(F)C(F)C(F)C(F)C(F)C(F)C(F)C(F)C(F)C(F)C(F)C(F)C(F)C(F)C(F)C(F)C(F)C(F)C(F)C(F)C(F)C(F)C(F)C(F)C(F)C(F)C(F)C(F)C(F)C(F)C(F)C(F)C(F)C(F)C(F)C(F)C(F)C(F)C(F)C(F)C(F)C(F)C(F)C(F)C(F)C(F)C(F)C(F)C(F)C(F)C(F)C(F)C(F)C(F)C(F)C(F)C(F)C(F)C(F)C(F)C(F)C(F)C(F)C(F)C(F)C(F)C(F)C(F)C(F)C(F)C(F)C(F)C(F)C(F)C(F)C(F)C(F)C(F)C(F)C(F)C(F)C(F)C(F)C(F)C(F)C(F)C(F)C(F)C(F)C(F)C(F)C(F)C(F)C(F)C(F)C(F)C(F)C(F)C(F)C(F)C(F)C(F)C(F)C(F)C(F)C(F)C(F)C(F)C(F)C(F)C(F)C(F)C(F)C(F)C(F)C(F)C(F)C(F)C(F)C(F)C(F)C(F)C(F)C(F)C(F)C(F)C(F)C(F)C(F)C(F)C(F)C(F)C(F)C(F)C(F)C(F)C(F)C(F)C(F)C(F)C(F)C(F)C(F)C(F)C(F)C(F)C(F)C(F)C(F)C(F)C(F)C(F)C(F)C(F)C(F)C(F)C(F)C(F)C(F)C(F) |       |       |      |   |     |









[illegible]













[illegible]

|         |                                                                |            |                                                                                                                                                                                                                                                                                                                                                                                                                                                                                                                                                                                                                                                                                                                                                                                                                                                                                                                                                                                                                                                                                                                                                                                                                                                                                                                                                                                                                                                                                                                                                                                                                                                                                                                                                                                                                                                                                                                                                                                                                                                                                                                                                                                                                                                                                                                                                                                                                                                                                                                                                                                                                                                                                                                                                                                                                                                                                                                                                                                                                                                                                                                                                                                                                                                                                                                                                                                                                                                                                                                                                                                                                                                                                                                                                                                                                                                                                                                                                                                                                                                                                                                                                                                                                                                                                                                                                                                                                                                                                                                                                                                                                                                                                                                                                                                                                                                                                                                                                                                                                                                                                                                                                                                                                                                                                                                                                                                                                                                                                                                                                                                                                                                                                                                                                                                                                                                                                                                                                                                                                                                                                                                                                                                                                                                                                                                                                                                                                                                                                                                                                                                                                                                                                                                                                                                                                                                                                                                                                                                                                                                                                                                                                                                                                                                                                                                                                                                                                                                                                                                                                                                                                                                                                                                                                                                                                                                                                                                                                                                                                                                                                                                                                                                                                                                                                                                                                                                                                                                                                                                                                                                                                                                                                                                                                                                                                                                                                                                                                                                                                                                                                                                                                                                                                                                                                                                                                                                                                                                                                                                                                                                                                                                                                                                                                                                                                                                                                                                                                                                                                                                                                                                                                                                                                                                                                                                                                                                                                                                                                                                                                                                                                                                                                                                                                                                                                                                                                                                                                                                                                                                                                                                                                                                                                                                                                                                                                                                                                                                                                                                                                                                                                                                                                                                                                                                                                                                                                                                                                                                                                                                                                                                                                                                                                                                                                                                                                                                                                                                                                                                                                                                                                                                                                                                                                                                                                                                                                                                                                                                           |
|---------|----------------------------------------------------------------|------------|-------------------------------------------------------------------------------------------------------------------------------------------------------------------------------------------------------------------------------------------------------------------------------------------------------------------------------------------------------------------------------------------------------------------------------------------------------------------------------------------------------------------------------------------------------------------------------------------------------------------------------------------------------------------------------------------------------------------------------------------------------------------------------------------------------------------------------------------------------------------------------------------------------------------------------------------------------------------------------------------------------------------------------------------------------------------------------------------------------------------------------------------------------------------------------------------------------------------------------------------------------------------------------------------------------------------------------------------------------------------------------------------------------------------------------------------------------------------------------------------------------------------------------------------------------------------------------------------------------------------------------------------------------------------------------------------------------------------------------------------------------------------------------------------------------------------------------------------------------------------------------------------------------------------------------------------------------------------------------------------------------------------------------------------------------------------------------------------------------------------------------------------------------------------------------------------------------------------------------------------------------------------------------------------------------------------------------------------------------------------------------------------------------------------------------------------------------------------------------------------------------------------------------------------------------------------------------------------------------------------------------------------------------------------------------------------------------------------------------------------------------------------------------------------------------------------------------------------------------------------------------------------------------------------------------------------------------------------------------------------------------------------------------------------------------------------------------------------------------------------------------------------------------------------------------------------------------------------------------------------------------------------------------------------------------------------------------------------------------------------------------------------------------------------------------------------------------------------------------------------------------------------------------------------------------------------------------------------------------------------------------------------------------------------------------------------------------------------------------------------------------------------------------------------------------------------------------------------------------------------------------------------------------------------------------------------------------------------------------------------------------------------------------------------------------------------------------------------------------------------------------------------------------------------------------------------------------------------------------------------------------------------------------------------------------------------------------------------------------------------------------------------------------------------------------------------------------------------------------------------------------------------------------------------------------------------------------------------------------------------------------------------------------------------------------------------------------------------------------------------------------------------------------------------------------------------------------------------------------------------------------------------------------------------------------------------------------------------------------------------------------------------------------------------------------------------------------------------------------------------------------------------------------------------------------------------------------------------------------------------------------------------------------------------------------------------------------------------------------------------------------------------------------------------------------------------------------------------------------------------------------------------------------------------------------------------------------------------------------------------------------------------------------------------------------------------------------------------------------------------------------------------------------------------------------------------------------------------------------------------------------------------------------------------------------------------------------------------------------------------------------------------------------------------------------------------------------------------------------------------------------------------------------------------------------------------------------------------------------------------------------------------------------------------------------------------------------------------------------------------------------------------------------------------------------------------------------------------------------------------------------------------------------------------------------------------------------------------------------------------------------------------------------------------------------------------------------------------------------------------------------------------------------------------------------------------------------------------------------------------------------------------------------------------------------------------------------------------------------------------------------------------------------------------------------------------------------------------------------------------------------------------------------------------------------------------------------------------------------------------------------------------------------------------------------------------------------------------------------------------------------------------------------------------------------------------------------------------------------------------------------------------------------------------------------------------------------------------------------------------------------------------------------------------------------------------------------------------------------------------------------------------------------------------------------------------------------------------------------------------------------------------------------------------------------------------------------------------------------------------------------------------------------------------------------------------------------------------------------------------------------------------------------------------------------------------------------------------------------------------------------------------------------------------------------------------------------------------------------------------------------------------------------------------------------------------------------------------------------------------------------------------------------------------------------------------------------------------------------------------------------------------------------------------------------------------------------------------------------------------------------------------------------------------------------------------------------------------------------------------------------------------------------------------------------------------------------------------------------------------------------------------------------------------------------------------------------------------------------------------------------------------------------------------------------------------------------------------------------------------------------------------------------------------------------------------------------------------------------------------------------------------------------------------------------------------------------------------------------------------------------------------------------------------------------------------------------------------------------------------------------------------------------------------------------------------------------------------------------------------------------------------------------------------------------------------------------------------------------------------------------------------------------------------------------------------------------------------------------------------------------------------------------------------------------------------------------------------------------------------------------------------------------------------------------------------------------------------------------------------------------------------------------------------------------------------------------------------------------------------------------------------------------------------------------------------------------------------------------------------------------------------------------------------------------------------------------------------------------------------------------------------------------------------------------------------------------------------------------------------------------------------------------------------------------------------------------------------------------------------------------------------------------------------------------------------------------------------------------------------------------------------------------------------------------------------------------------------------------------------------------------------------------------------------------------------------------------------------------------------------------------------------------------------------------------------------------------------------------------------------------------------------------------------------------------------------------------------------------------------------------------------------------------------------------------------------------------------------------------------------------------------------------------------------------------------------------------------------------------------------------------------------------------------------------------------------------------------------------------------------------------------------------------------------------------------------------------------------------------------------------------------------------------------------------------------------------------------------------------------------------------------------------------------------------------------------------------------------------------------------------------------------------------------------------------------------------------------------------------------------------------------------------------------------------------------------------------------------------------------------------------------------------------------------------------------------------------------------------------------------------------------------------------------------------------------------------------------------------------------------------------------------------------------------------------------------------------------------------------------------------------------------------------------------------------------------------------------------------------------|
| QL00582 | Potassium N-((heptadecafluorooctyl)sulfonyl)-N-propylglycinate | 55910-10-6 | C(N([S]([O])=O)C(F)(F)C(F)C(F)C(F)C(F)C(F)C(F)C(F)C(F)C(F)C(F)C(F)C(F)C(F)C(F)C(F)C(F)C(F)C(F)C(F)C(F)C(F)C(F)C(F)C(F)C(F)C(F)C(F)C(F)C(F)C(F)C(F)C(F)C(F)C(F)C(F)C(F)C(F)C(F)C(F)C(F)C(F)C(F)C(F)C(F)C(F)C(F)C(F)C(F)C(F)C(F)C(F)C(F)C(F)C(F)C(F)C(F)C(F)C(F)C(F)C(F)C(F)C(F)C(F)C(F)C(F)C(F)C(F)C(F)C(F)C(F)C(F)C(F)C(F)C(F)C(F)C(F)C(F)C(F)C(F)C(F)C(F)C(F)C(F)C(F)C(F)C(F)C(F)C(F)C(F)C(F)C(F)C(F)C(F)C(F)C(F)C(F)C(F)C(F)C(F)C(F)C(F)C(F)C(F)C(F)C(F)C(F)C(F)C(F)C(F)C(F)C(F)C(F)C(F)C(F)C(F)C(F)C(F)C(F)C(F)C(F)C(F)C(F)C(F)C(F)C(F)C(F)C(F)C(F)C(F)C(F)C(F)C(F)C(F)C(F)C(F)C(F)C(F)C(F)C(F)C(F)C(F)C(F)C(F)C(F)C(F)C(F)C(F)C(F)C(F)C(F)C(F)C(F)C(F)C(F)C(F)C(F)C(F)C(F)C(F)C(F)C(F)C(F)C(F)C(F)C(F)C(F)C(F)C(F)C(F)C(F)C(F)C(F)C(F)C(F)C(F)C(F)C(F)C(F)C(F)C(F)C(F)C(F)C(F)C(F)C(F)C(F)C(F)C(F)C(F)C(F)C(F)C(F)C(F)C(F)C(F)C(F)C(F)C(F)C(F)C(F)C(F)C(F)C(F)C(F)C(F)C(F)C(F)C(F)C(F)C(F)C(F)C(F)C(F)C(F)C(F)C(F)C(F)C(F)C(F)C(F)C(F)C(F)C(F)C(F)C(F)C(F)C(F)C(F)C(F)C(F)C(F)C(F)C(F)C(F)C(F)C(F)C(F)C(F)C(F)C(F)C(F)C(F)C(F)C(F)C(F)C(F)C(F)C(F)C(F)C(F)C(F)C(F)C(F)C(F)C(F)C(F)C(F)C(F)C(F)C(F)C(F)C(F)C(F)C(F)C(F)C(F)C(F)C(F)C(F)C(F)C(F)C(F)C(F)C(F)C(F)C(F)C(F)C(F)C(F)C(F)C(F)C(F)C(F)C(F)C(F)C(F)C(F)C(F)C(F)C(F)C(F)C(F)C(F)C(F)C(F)C(F)C(F)C(F)C(F)C(F)C(F)C(F)C(F)C(F)C(F)C(F)C(F)C(F)C(F)C(F)C(F)C(F)C(F)C(F)C(F)C(F)C(F)C(F)C(F)C(F)C(F)C(F)C(F)C(F)C(F)C(F)C(F)C(F)C(F)C(F)C(F)C(F)C(F)C(F)C(F)C(F)C(F)C(F)C(F)C(F)C(F)C(F)C(F)C(F)C(F)C(F)C(F)C(F)C(F)C(F)C(F)C(F)C(F)C(F)C(F)C(F)C(F)C(F)C(F)C(F)C(F)C(F)C(F)C(F)C(F)C(F)C(F)C(F)C(F)C(F)C(F)C(F)C(F)C(F)C(F)C(F)C(F)C(F)C(F)C(F)C(F)C(F)C(F)C(F)C(F)C(F)C(F)C(F)C(F)C(F)C(F)C(F)C(F)C(F)C(F)C(F)C(F)C(F)C(F)C(F)C(F)C(F)C(F)C(F)C(F)C(F)C(F)C(F)C(F)C(F)C(F)C(F)C(F)C(F)C(F)C(F)C(F)C(F)C(F)C(F)C(F)C(F)C(F)C(F)C(F)C(F)C(F)C(F)C(F)C(F)C(F)C(F)C(F)C(F)C(F)C(F)C(F)C(F)C(F)C(F)C(F)C(F)C(F)C(F)C(F)C(F)C(F)C(F)C(F)C(F)C(F)C(F)C(F)C(F)C(F)C(F)C(F)C(F)C(F)C(F)C(F)C(F)C(F)C(F)C(F)C(F)C(F)C(F)C(F)C(F)C(F)C(F)C(F)C(F)C(F)C(F)C(F)C(F)C(F)C(F)C(F)C(F)C(F)C(F)C(F)C(F)C(F)C(F)C(F)C(F)C(F)C(F)C(F)C(F)C(F)C(F)C(F)C(F)C(F)C(F)C(F)C(F)C(F)C(F)C(F)C(F)C(F)C(F)C(F)C(F)C(F)C(F)C(F)C(F)C(F)C(F)C(F)C(F)C(F)C(F)C(F)C(F)C(F)C(F)C(F)C(F)C(F)C(F)C(F)C(F)C(F)C(F)C(F)C(F)C(F)C(F)C(F)C(F)C(F)C(F)C(F)C(F)C(F)C(F)C(F)C(F)C(F)C(F)C(F)C(F)C(F)C(F)C(F)C(F)C(F)C(F)C(F)C(F)C(F)C(F)C(F)C(F)C(F)C(F)C(F)C(F)C(F)C(F)C(F)C(F)C(F)C(F)C(F)C(F)C(F)C(F)C(F)C(F)C(F)C(F)C(F)C(F)C(F)C(F)C(F)C(F)C(F)C(F)C(F)C(F)C(F)C(F)C(F)C(F)C(F)C(F)C(F)C(F)C(F)C(F)C(F)C(F)C(F)C(F)C(F)C(F)C(F)C(F)C(F)C(F)C(F)C(F)C(F)C(F)C(F)C(F)C(F)C(F)C(F)C(F)C(F)C(F)C(F)C(F)C(F)C(F)C(F)C(F)C(F)C(F)C(F)C(F)C(F)C(F)C(F)C(F)C(F)C(F)C(F)C(F)C(F)C(F)C(F)C(F)C(F)C(F)C(F)C(F)C(F)C(F)C(F)C(F)C(F)C(F)C(F)C(F)C(F)C(F)C(F)C(F)C(F)C(F)C(F)C(F)C(F)C(F)C(F)C(F)C(F)C(F)C(F)C(F)C(F)C(F)C(F)C(F)C(F)C(F)C(F)C(F)C(F)C(F)C(F)C(F)C(F)C(F)C(F)C(F)C(F)C(F)C(F)C(F)C(F)C(F)C(F)C(F)C(F)C(F)C(F)C(F)C(F)C(F)C(F)C(F)C(F)C(F)C(F)C(F)C(F)C(F)C(F)C(F)C(F)C(F)C(F)C(F)C(F)C(F)C(F)C(F)C(F)C(F)C(F)C(F)C(F)C(F)C(F)C(F)C(F)C(F)C(F)C(F)C(F)C(F)C(F)C(F)C(F)C(F)C(F)C(F)C(F)C(F)C(F)C(F)C(F)C(F)C(F)C(F)C(F)C(F)C(F)C(F)C(F)C(F)C(F)C(F)C(F)C(F)C(F)C(F)C(F)C(F)C(F)C(F)C(F)C(F)C(F)C(F)C(F)C(F)C(F)C(F)C(F)C(F)C(F)C(F)C(F)C(F)C(F)C(F)C(F)C(F)C(F)C(F)C(F)C(F)C(F)C(F)C(F)C(F)C(F)C(F)C(F)C(F)C(F)C(F)C(F)C(F)C(F)C(F)C(F)C(F)C(F)C(F)C(F)C(F)C(F)C(F)C(F)C(F)C(F)C(F)C(F)C(F)C(F)C(F)C(F)C(F)C(F)C(F)C(F)C(F)C(F)C(F)C(F)C(F)C(F)C(F)C(F)C(F)C(F)C(F)C(F)C(F)C(F)C(F)C(F)C(F)C(F)C(F)C(F)C(F)C(F)C(F)C(F)C(F)C(F)C(F)C(F)C(F)C(F)C(F)C(F)C(F)C(F)C(F)C(F)C(F)C(F)C(F)C(F)C(F)C(F)C(F)C(F)C(F)C(F)C(F)C(F)C(F)C(F)C(F)C(F)C(F)C(F)C(F)C(F)C(F)C(F)C(F)C(F)C(F)C(F)C(F)C(F)C(F)C(F)C(F)C(F)C(F)C(F)C(F)C(F)C(F)C(F)C(F)C(F)C(F)C(F)C(F)C(F)C(F)C(F)C(F)C(F)C(F)C(F)C(F)C(F)C(F)C(F)C(F)C(F)C(F)C(F)C(F)C(F)C(F)C(F)C(F)C(F)C(F)C(F)C(F)C(F)C(F)C(F)C(F)C(F)C(F)C(F)C(F)C(F)C(F)C(F)C(F)C(F)C(F)C(F)C(F)C(F)C(F)C(F)C(F)C(F)C(F)C(F)C(F)C(F)C(F)C(F)C(F)C(F)C(F)C(F)C(F)C(F)C(F)C(F)C(F)C(F)C(F)C(F)C(F)C(F)C(F)C(F)C(F)C(F)C(F)C(F)C(F)C(F)C(F)C(F)C(F)C(F)C(F)C(F)C(F)C(F)C(F)C(F)C(F)C(F)C(F)C(F)C(F)C(F)C(F)C(F)C(F)C(F)C(F)C(F)C(F)C(F)C(F)C(F)C(F)C(F)C(F)C(F)C(F)C(F)C(F)C(F)C(F)C(F)C(F)C(F)C(F)C(F)C(F)C(F)C(F)C(F)C(F)C(F)C(F)C(F)C(F)C(F)C(F)C(F)C(F)C(F)C(F)C(F)C(F)C(F)C(F)C(F)C(F)C(F)C(F)C(F)C(F)C(F)C(F)C(F)C(F)C(F)C(F)C(F)C(F)C(F)C(F)C(F)C(F)C(F)C(F)C(F)C(F)C(F)C(F)C(F)C(F)C(F)C(F)C(F)C(F)C(F)C(F)C(F)C(F)C(F)C(F)C(F)C(F)C(F)C(F)C(F)C(F)C(F)C(F)C(F)C(F)C(F)C(F)C(F)C(F)C(F)C(F)C(F)C(F)C(F)C(F)C(F)C(F)C(F)C(F)C(F)C(F)C(F)C(F)C(F)C(F)C(F)C(F)C(F)C(F)C(F)C(F)C(F)C(F)C(F)C(F)C(F)C(F)C(F)C(F)C(F)C(F)C(F)C(F)C(F)C(F)C(F)C(F)C(F)C(F)C(F)C(F)C(F)C(F)C(F)C(F)C(F)C(F)C(F)C(F)C(F)C(F)C(F)C(F)C(F)C(F)C(F)C(F)C(F)C(F)C(F)C(F)C(F)C(F)C(F)C(F)C(F)C(F)C(F)C(F)C(F)C(F)C(F)C(F)C(F)C(F)C(F)C(F)C(F)C(F)C(F)C(F)C(F)C(F)C(F)C(F)C(F)C(F)C(F)C(F)C(F)C(F)C(F)C(F)C(F)C(F)C(F)C(F)C(F)C(F)C(F)C(F)C(F)C(F)C(F)C(F)C(F)C(F)C(F)C(F)C(F)C(F)C(F)C(F)C(F)C(F)C(F)C(F)C(F)C(F)C(F)C(F)C(F)C(F)C(F)C(F)C(F)C(F)C(F)C(F)C(F)C(F)C(F)C(F)C(F)C(F)C(F)C(F)C(F)C(F)C(F)C(F)C(F)C(F)C(F)C(F)C(F)C(F)C(F)C(F)C(F)C(F)C(F)C(F)C(F)C(F)C(F)C(F)C(F)C(F)C(F)C(F)C(F)C(F)C(F)C(F)C(F)C(F)C(F)C(F)C(F)C(F)C(F)C(F)C(F)C(F)C(F)C(F)C(F)C(F)C(F)C(F)C(F)C(F)C(F)C(F)C(F)C(F)C(F)C(F)C(F)C(F)C(F)C(F)C(F)C(F)C(F)C(F)C(F)C(F)C(F)C(F)C(F)C(F)C(F)C(F)C(F)C(F)C(F)C(F)C(F)C(F)C(F)C(F)C(F)C(F)C(F)C(F)C(F)C(F)C(F)C(F)C(F)C(F)C(F)C(F)C(F)C(F)C(F)C(F)C(F)C(F)C(F)C(F)C(F)C(F)C(F)C(F)C(F)C(F)C(F)C(F)C(F)C(F)C(F)C(F)C(F)C(F)C(F)C(F)C(F)C(F)C(F)C(F)C(F)C(F)C(F)C(F)C(F)C(F)C(F)C(F)C(F)C(F)C(F)C(F)C(F)C(F)C(F)C(F)C(F)C(F)C(F)C(F)C(F)C(F)C(F)C(F)C(F)C(F)C(F)C(F)C(F)C(F)C(F)C(F)C(F)C(F)C(F)C(F)C(F)C(F)C(F)C(F)C(F)C(F)C(F)C(F)C(F)C(F)C(F)C(F)C(F)C(F)C(F)C(F)C(F)C(F)C(F)C(F)C(F)C(F)C(F)C(F)C(F)C(F)C(F)C(F)C(F)C(F)C(F)C(F)C(F)C(F)C(F)C(F)C(F)C(F)C(F)C(F)C(F)C(F)C(F)C(F)C(F)C(F)C(F)C(F)C(F)C(F)C(F)C(F)C(F)C(F)C(F)C(F)C(F)C(F)C(F)C(F)C(F)C(F)C(F)C(F)C(F)C(F)C(F)C(F)C(F)C(F)C(F)C(F)C(F)C(F)C(F)C(F)C(F)C(F)C(F)C(F)C(F)C(F)C(F)C(F)C(F)C(F)C(F)C(F)C(F)C(F)C(F)C(F)C(F)C(F)C(F)C(F)C(F)C(F)C(F)C(F)C(F)C(F)C(F)C(F)C(F)C(F)C(F)C(F)C(F)C(F)C(F)C(F)C(F)C(F)C(F)C(F)C(F)C(F)C(F)C(F)C(F)C(F)C(F)C(F)C(F)C(F)C(F)C(F)C(F)C(F)C(F)C(F)C(F)C(F)C(F)C(F)C(F)C(F)C(F)C(F)C(F)C(F)C(F)C(F)C(F)C(F)C(F)C(F)C(F)C(F)C(F)C(F)C(F)C(F)C(F)C(F)C(F)C(F)C(F)C(F)C(F)C(F)C(F)C(F)C(F)C(F)C(F)C(F)C(F)C(F)C(F)C(F)C(F)C(F)C(F)C(F)C(F)C(F)C(F)C(F)C(F)C(F)C(F)C(F)C(F)C(F)C(F)C(F)C(F)C(F)C(F)C(F)C(F)C(F)C(F)C(F)C(F)C(F)C(F)C(F)C(F)C(F)C(F)C(F)C(F)C(F)C(F)C(F)C(F)C(F)C(F)C(F)C(F)C(F)C(F)C(F)C(F)C(F)C(F)C(F)C(F)C(F)C(F)C(F)C(F)C(F)C(F)C(F)C(F)C(F)C(F)C(F)C(F)C(F)C(F)C(F)C(F)C(F)C(F)C(F)C(F)C(F)C(F)C(F)C(F)C(F)C(F)C(F)C(F)C(F)C(F)C(F)C(F)C(F)C(F)C(F)C(F)C(F)C(F)C(F)C(F)C(F)C(F)C(F)C(F)C(F)C(F)C(F)C(F)C(F)C(F)C(F)C(F)C(F)C(F)C(F)C(F)C(F)C(F)C(F)C(F)C(F)C(F)C(F)C(F)C(F)C(F)C(F)C(F)C(F)C(F)C(F)C(F)C(F)C(F)C(F)C(F)C(F)C(F)C(F)C(F)C(F)C(F)C(F)C(F)C(F)C(F)C(F)C(F)C(F)C(F)C(F)C(F)C(F)C(F)C(F)C(F)C(F)C(F)C(F)C(F)C(F)C(F)C(F)C(F)C(F)C(F)C(F)C(F)C(F)C(F)C(F)C(F)C(F)C(F)C(F)C(F)C(F)C(F)C(F)C(F)C(F)C(F)C(F)C(F)C(F)C(F)C(F)C(F)C(F)C(F)C(F)C(F)C(F)C(F)C(F)C(F)C(F)C(F)C(F)C(F)C(F)C(F)C(F)C(F)C(F)C(F)C(F)C(F)C(F)C(F)C(F)C(F)C(F)C(F)C(F)C(F)C(F)C(F)C(F)C(F)C(F)C(F)C(F)C(F)C(F)C(F)C(F)C(F)C(F)C(F)C(F)C(F)C(F)C(F)C(F)C(F)C(F)C(F)C(F)C(F)C(F)C(F)C(F)C(F)C(F)C(F)C(F)C(F)C(F)C(F)C(F)C(F)C(F)C(F)C(F)C(F)C(F)C(F)C(F)C(F)C(F)C(F)C(F)C(F)C(F)C(F)C(F)C(F)C(F)C(F)C(F)C(F)C(F)C(F)C(F)C(F)C(F)C(F)C(F)C(F)C(F)C(F)C(F)C(F)C(F)C(F)C(F)C(F)C(F)C(F)C(F)C(F)C(F)C(F)C(F)C(F)C(F)C(F)C(F)C(F)C(F)C(F)C(F)C(F)C(F)C(F)C(F)C(F)C(F)C(F)C(F)C(F)C(F)C(F)C(F)C(F)C(F)C(F)C(F)C(F)C(F)C(F)C(F)C(F)C(F)C(F)C(F)C(F)C(F)C(F)C(F)C(F)C(F)C(F)C(F)C(F)C(F)C(F)C(F)C(F)C(F)C(F)C(F)C(F)C(F)C(F)C(F)C(F)C(F)C(F)C(F)C(F)C(F)C(F)C(F)C(F)C(F)C(F)C(F)C(F)C(F)C(F)C(F)C(F)C(F)C(F)C(F)C(F)C(F)C(F)C(F)C(F)C(F)C(F)C(F)C(F)C(F)C(F)C(F)C(F)C(F)C(F)C(F)C(F)C(F)C(F)C(F)C(F)C(F)C(F)C(F)C(F)C(F)C(F)C(F)C(F)C(F)C(F)C(F)C(F)C(F)C(F)C(F)C(F)C(F)C(F)C(F)C(F)C(F)C(F)C(F)C(F)C(F)C(F)C(F)C(F)C(F)C(F)C(F)C(F)C(F)C(F)C(F)C(F)C(F)C(F)C(F)C(F)C(F)C(F)C(F)C(F)C(F)C(F)C(F)C(F)C(F)C(F)C(F)C(F)C(F)C(F)C(F)C(F)C(F)C(F)C(F)C(F)C(F)C(F)C(F)C(F)C(F)C(F)C(F)C(F)C(F)C(F)C(F)C(F)C(F)C(F)C(F)C(F)C(F)C(F)C(F)C(F)C(F)C(F)C(F)C(F)C(F)C(F)C(F)C(F)C(F)C(F)C(F)C(F)C(F)C(F)C(F)C(F)C(F)C(F)C(F)C(F)C(F)C(F)C(F)C(F)C(F)C(F)C(F)C(F)C(F)C(F)C(F)C(F)C(F)C(F)C(F)C(F)C(F)C(F)C(F)C(F)C(F)C(F)C(F)C(F)C(F)C(F)C(F)C(F)C(F)C(F)C(F)C(F)C(F)C(F)C(F)C(F)C(F)C(F)C(F)C(F)C(F)C(F)C(F)C(F)C(F)C(F)C(F)C(F)C(F)C(F)C(F)C(F)C(F)C(F)C(F)C(F)C(F)C(F)C(F)C(F)C(F)C(F)C(F)C(F)C(F)C(F)C(F)C(F)C(F)C(F)C(F)C(F)C(F)C(F)C(F)C(F)C(F)C(F)C(F)C(F)C(F)C(F)C(F)C(F)C(F)C(F)C(F)C(F)C(F)C(F)C(F)C(F)C(F)C(F)C(F)C(F)C(F)C(F)C(F)C(F)C(F)C(F)C(F)C(F)C(F)C(F)C(F)C(F)C(F)C(F)C(F)C(F)C(F)C(F)C(F)C(F)C(F)C(F)C(F)C(F)C(F)C(F)C(F)C(F)C(F)C(F)C(F)C(F)C(F)C(F)C(F)C(F)C(F)C(F)C(F)C(F)C(F)C(F)C(F)C(F)C(F)C(F)C(F)C(F)C(F)C(F)C(F)C(F)C(F)C(F)C(F)C(F)C(F)C(F)C(F)C(F)C(F)C(F)C(F)C(F)C(F)C(F)C(F)C(F)C(F)C(F)C(F)C(F)C(F)C(F)C(F)C(F)C(F)C(F)C(F)C(F)C(F)C(F)C(F)C(F)C(F)C(F)C(F)C(F)C(F)C(F)C(F)C(F)C(F)C(F)C(F)C(F)C(F)C(F)C(F)C(F)C(F)C(F)C(F)C(F)C(F)C(F)C(F)C(F)C(F)C(F)C(F)C(F)C(F)C(F)C(F)C(F)C(F)C(F)C(F)C(F)C(F)C(F)C(F)C(F)C(F)C(F)C(F)C(F)C(F)C(F)C(F)C(F)C(F)C(F)C(F)C(F)C(F)C(F)C(F)C(F)C(F)C(F)C(F)C(F)C(F)C(F)C(F)C(F)C(F)C(F)C(F)C(F)C(F)C(F)C(F)C(F)C(F)C(F)C(F)C(F)C(F)C(F)C(F)C(F)C(F)C(F)C(F)C(F)C(F)C(F)C(F)C(F)C(F)C(F)C(F)C(F)C(F)C(F)C(F)C(F)C(F)C(F)C(F)C(F)C(F)C(F)C(F)C(F)C(F)C(F)C(F)C(F)C(F)C(F)C(F)C(F)C(F)C(F)C(F)C(F)C(F)C(F)C(F)C(F)C(F)C(F)C(F)C(F)C(F)C(F)C(F)C(F)C(F)C(F)C(F)C(F)C(F)C(F)C(F)C(F)C(F)C(F)C(F)C(F)C(F)C(F)C(F)C(F)C(F)C(F)C(F)C(F)C(F)C(F)C(F)C(F)C(F)C(F)C(F)C(F)C(F)C(F)C(F)C(F)C(F)C(F)C(F)C(F)C(F)C(F)C(F)C(F)C(F)C(F)C(F)C(F)C(F)C(F)C(F)C(F)C(F)C(F)C(F)C(F)C(F)C(F)C(F)C(F)C(F)C(F)C(F)C(F)C(F)C(F)C(F)C(F)C(F)C(F)C(F)C(F)C(F)C(F)C(F)C(F)C(F)C(F)C(F)C(F)C(F)C(F)C(F)C(F)C(F)C(F)C(F)C(F)C(F)C(F)C(F)C(F)C(F)C(F)C(F)C(F)C(F)C(F)C(F)C(F)C(F)C(F)C(F)C(F)C(F)C(F)C(F)C(F)C(F)C(F)C(F)C(F)C(F)C(F)C(F)C(F)C(F)C(F)C(F)C(F)C(F)C(F)C(F)C(F)C(F)C(F)C(F)C(F)C(F)C(F)C(F)C(F)C(F)C(F)C(F)C(F)C(F)C(F)C(F)C(F)C(F)C(F)C(F)C(F)C(F)C(F)C(F)C(F)C(F)C(F)C(F)C(F)C(F)C(F)C(F)C(F)C(F)C(F)C(F)C(F)C(F)C(F)C(F)C(F)C(F)C(F)C(F)C(F)C(F)C(F)C(F)C(F)C(F)C(F)C(F)C(F)C(F)C(F)C(F)C(F)C(F)C(F)C(F)C(F)C(F)C(F)C(F)C(F)C(F)C(F)C(F)C(F)C(F)C(F)C(F)C(F)C(F)C(F)C(F)C(F)C(F)C(F)C(F)C(F)C(F)C(F)C(F)C(F)C(F)C(F)C(F)C(F)C(F)C(F)C(F)C(F)C(F)C(F)C(F)C(F)C(F)C(F)C(F)C(F)C(F)C(F)C(F)C(F)C(F)C(F)C(F)C(F)C(F)C(F)C(F)C(F)C(F)C(F)C(F)C(F)C(F)C(F)C(F)C(F)C(F)C(F)C(F)C(F)C(F)C(F)C(F)C(F)C(F)C(F)C(F)C(F)C(F)C(F)C(F)C(F)C(F)C(F)C(F)C(F)C(F)C(F)C(F)C(F)C(F)C(F)C(F)C(F)C(F)C(F)C(F)C(F)C(F)C(F)C(F)C(F)C(F)C(F)C(F)C(F)C(F)C(F)C(F)C(F)C(F)C(F)C(F)C(F)C(F)C(F)C(F)C(F)C(F)C(F)C(F)C(F)C(F)C(F)C(F)C(F)C(F)C(F)C(F)C(F)C(F)C(F)C(F)C(F)C(F)C(F)C(F)C(F)C(F)C(F)C(F)C(F)C(F)C(F)C(F)C(F)C(F)C(F)C(F)C(F)C(F)C(F)C(F)C(F)C(F)C(F)C(F)C(F)C(F)C(F)C(F)C(F)C(F)C(F)C(F)C(F)C(F)C(F)C(F)C(F)C(F)C(F)C(F)C(F)C(F)C(F)C(F)C(F)C(F)C(F)C(F)C(F)C(F)C(F)C(F)C(F)C(F)C(F)C(F)C(F)C(F)C(F)C(F)C(F)C(F)C(F)C(F)C(F)C(F)C(F)C(F)C(F)C(F)C(F)C(F)C(F)C(F)C(F)C(F)C(F)C(F)C(F)C(F)C(F)C(F)C(F)C(F)C(F)C(F)C(F)C(F)C(F)C(F)C(F)C(F)C(F)C(F)C(F)C(F)C(F)C(F)C(F)C(F)C(F)C(F)C(F)C(F)C(F)C(F)C(F)C(F)C(F)C(F)C(F)C(F)C(F)C(F)C(F)C(F)C(F)C(F)C(F)C(F)C(F)C(F)C(F)C(F)C(F)C(F)C(F)C(F)C(F)C(F)C(F)C(F)C(F)C(F)C(F)C(F)C(F)C(F)C(F)C(F)C(F)C(F)C(F)C(F)C(F)C(F)C(F)C(F)C(F)C(F)C(F)C(F)C(F)C(F)C(F)C(F)C(F)C(F)C(F)C(F)C(F)C(F)C(F)C(F)C(F)C(F)C(F)C(F)C(F)C(F)C(F)C(F)C(F)C(F)C(F)C(F)C(F)C(F)C(F)C(F)C(F)C(F)C(F)C(F)C(F)C(F)C(F)C(F)C(F)C(F)C(F)C(F)C(F)C(F)C(F)C(F)C(F)C(F)C(F)C(F)C(F)C(F)C(F)C(F)C(F)C(F)C(F)C(F)C(F)C(F)C(F)C(F)C(F)C(F)C(F)C(F)C(F)C(F)C(F)C(F)C(F)C(F)C(F)C(F)C(F)C(F)C(F)C(F)C(F)C(F)C(F)C(F)C(F)C(F)C(F)C(F)C(F)C(F)C(F)C(F)C(F)C(F)C(F)C(F)C(F)C(F)C(F)C(F)C(F)C(F)C(F)C(F)C(F)C(F)C(F)C(F)C(F)C(F)C(F)C(F)C(F)C(F)C(F)C(F)C(F)C(F)C(F)C(F)C(F)C(F)C(F)C(F)C(F)C(F)C(F)C(F)C(F)C(F)C(F)C(F)C(F)C(F)C(F)C(F)C(F)C(F)C(F)C(F)C(F)C(F)C(F)C(F)C(F)C(F)C(F)C(F)C(F)C(F)C(F)C(F)C(F)C(F)C(F)C(F)C(F)C(F)C(F)C(F)C(F)C(F)C(F)C(F)C(F)C(F)C(F)C(F)C(F)C(F)C(F)C(F)C(F)C(F)C(F)C(F)C(F)C(F)C(F)C(F)C(F)C(F)C(F)C(F)C(F)C(F)C(F)C(F)C(F)C(F)C(F)C(F)C(F)C(F)C(F)C(F)C(F)C(F)C(F)C(F)C(F)C(F)C(F)C(F)C(F)C(F)C(F)C(F)C(F)C(F)C(F)C(F)C(F)C(F)C(F)C(F)C(F)C(F)C(F)C(F)C(F)C(F)C(F)C(F)C(F)C(F)C(F)C(F)C(F)C(F)C(F)C(F)C(F)C(F)C(F)C(F)C(F)C(F)C(F)C(F)C(F)C(F)C(F)C(F)C(F)C(F)C(F)C(F)C(F)C(F)C(F)C(F)C(F)C(F)C(F)C(F)C(F)C(F)C(F)C(F)C(F)C(F)C(F)C(F)C(F)C(F)C(F)C(F)C(F)C(F)C(F)C(F)C(F)C(F)C(F)C(F)C(F)C(F)C(F)C(F)C(F)C(F)C(F)C(F)C(F)C(F)C(F)C(F)C(F)C(F)C(F)C(F)C(F)C(F)C(F)C(F)C(F)C(F)C(F)C(F)C(F)C(F)C(F)C(F)C(F)C(F)C(F)C(F)C(F)C(F)C(F)C(F)C(F)C(F)C(F)C(F)C(F)C(F)C(F)C(F)C(F)C(F)C(F)C(F)C(F)C(F)C(F)C(F)C(F |
|---------|----------------------------------------------------------------|------------|-------------------------------------------------------------------------------------------------------------------------------------------------------------------------------------------------------------------------------------------------------------------------------------------------------------------------------------------------------------------------------------------------------------------------------------------------------------------------------------------------------------------------------------------------------------------------------------------------------------------------------------------------------------------------------------------------------------------------------------------------------------------------------------------------------------------------------------------------------------------------------------------------------------------------------------------------------------------------------------------------------------------------------------------------------------------------------------------------------------------------------------------------------------------------------------------------------------------------------------------------------------------------------------------------------------------------------------------------------------------------------------------------------------------------------------------------------------------------------------------------------------------------------------------------------------------------------------------------------------------------------------------------------------------------------------------------------------------------------------------------------------------------------------------------------------------------------------------------------------------------------------------------------------------------------------------------------------------------------------------------------------------------------------------------------------------------------------------------------------------------------------------------------------------------------------------------------------------------------------------------------------------------------------------------------------------------------------------------------------------------------------------------------------------------------------------------------------------------------------------------------------------------------------------------------------------------------------------------------------------------------------------------------------------------------------------------------------------------------------------------------------------------------------------------------------------------------------------------------------------------------------------------------------------------------------------------------------------------------------------------------------------------------------------------------------------------------------------------------------------------------------------------------------------------------------------------------------------------------------------------------------------------------------------------------------------------------------------------------------------------------------------------------------------------------------------------------------------------------------------------------------------------------------------------------------------------------------------------------------------------------------------------------------------------------------------------------------------------------------------------------------------------------------------------------------------------------------------------------------------------------------------------------------------------------------------------------------------------------------------------------------------------------------------------------------------------------------------------------------------------------------------------------------------------------------------------------------------------------------------------------------------------------------------------------------------------------------------------------------------------------------------------------------------------------------------------------------------------------------------------------------------------------------------------------------------------------------------------------------------------------------------------------------------------------------------------------------------------------------------------------------------------------------------------------------------------------------------------------------------------------------------------------------------------------------------------------------------------------------------------------------------------------------------------------------------------------------------------------------------------------------------------------------------------------------------------------------------------------------------------------------------------------------------------------------------------------------------------------------------------------------------------------------------------------------------------------------------------------------------------------------------------------------------------------------------------------------------------------------------------------------------------------------------------------------------------------------------------------------------------------------------------------------------------------------------------------------------------------------------------------------------------------------------------------------------------------------------------------------------------------------------------------------------------------------------------------------------------------------------------------------------------------------------------------------------------------------------------------------------------------------------------------------------------------------------------------------------------------------------------------------------------------------------------------------------------------------------------------------------------------------------------------------------------------------------------------------------------------------------------------------------------------------------------------------------------------------------------------------------------------------------------------------------------------------------------------------------------------------------------------------------------------------------------------------------------------------------------------------------------------------------------------------------------------------------------------------------------------------------------------------------------------------------------------------------------------------------------------------------------------------------------------------------------------------------------------------------------------------------------------------------------------------------------------------------------------------------------------------------------------------------------------------------------------------------------------------------------------------------------------------------------------------------------------------------------------------------------------------------------------------------------------------------------------------------------------------------------------------------------------------------------------------------------------------------------------------------------------------------------------------------------------------------------------------------------------------------------------------------------------------------------------------------------------------------------------------------------------------------------------------------------------------------------------------------------------------------------------------------------------------------------------------------------------------------------------------------------------------------------------------------------------------------------------------------------------------------------------------------------------------------------------------------------------------------------------------------------------------------------------------------------------------------------------------------------------------------------------------------------------------------------------------------------------------------------------------------------------------------------------------------------------------------------------------------------------------------------------------------------------------------------------------------------------------------------------------------------------------------------------------------------------------------------------------------------------------------------------------------------------------------------------------------------------------------------------------------------------------------------------------------------------------------------------------------------------------------------------------------------------------------------------------------------------------------------------------------------------------------------------------------------------------------------------------------------------------------------------------------------------------------------------------------------------------------------------------------------------------------------------------------------------------------------------------------------------------------------------------------------------------------------------------------------------------------------------------------------------------------------------------------------------------------------------------------------------------------------------------------------------------------------------------------------------------------------------------------------------------------------------------------------------------------------------------------------------------------------------------------------------------------------------------------------------------------------------------------------------------------------------------------------------------------------------------------------------------------------------------------------------------------------------------------------------------------------------------------------------------------------------------------------------------------------------------------------------------------------------------------------------------------------------------------------------------------------------------------------------------------------------------------------------------------------------------------------------------------------------------------------------------------------------------------------------------------------------------------------------------------------------------------------------------------------------------------------------------------------------------------------------------------------------------------------------------------------------------------------------------------------------------------------------------------------------------------------------------------------------------------------------------------------------------------------------------------------------------------------------------------------------------------------------------------------------------------------------------------------------------------------------------------------------------------------------------------------------------------------------------------------------------------------------------------------------------------------------------------------------------------------------------------------------------------------------------------------------------------------------------------------------------------------------------------------------------------------------------------------------------------------------------------------------------------------------------------------------------------------------------------------------------------------------------------------------------------------------------------------------------------------------------------------------------------------------------------------------------------------------------------|



[illegible]

[illegible]









[illegible]



[illegible]

|         |                                                                                                                                            |              |                                                                                                                                                    |       |       |      |   |     |
|---------|--------------------------------------------------------------------------------------------------------------------------------------------|--------------|----------------------------------------------------------------------------------------------------------------------------------------------------|-------|-------|------|---|-----|
| QL00972 | 3,3,4,4,5,5,6,6,7,7,8,8,9,9-Pentadecafluoro-2-methylnonan-2-ol                                                                             | 92914-88-0   | CC(C)(O)(C)(F)(C)(F)(C)(F)(C)(F)(C)(F)(C)(F)(F)                                                                                                    | -7.53 | 45.45 | 2.24 | P | IN  |
| QL00973 | 2-Perfluoropropyl-2-propanol                                                                                                               | 355-22-6     | CC(C)(O)(C)(F)(C)(F)(C)(F)(F)                                                                                                                      | -5.10 | 33.33 | 1.45 | P | IN  |
| QL00974 | 5,5,6,6,7,7,8,8-Nonafluoro-2-methyloct-3-yn-2-ol                                                                                           | 82721-68-4   | CC(C)(O)C#CC(F)(C)(F)(C)(F)(C)(F)(F)                                                                                                               | -6.75 | 34.62 | 2.17 | P | IN  |
| QL00975 | 5,5,6,6,7,7,8,8,9,10,10,11,11,12,12-Heptadecafluoro-2-methyldodecan-2-ol                                                                   | 141183-94-0  | CC(C)(O)CCCC(F)(C)(F)(C)(F)(C)(F)(C)(F)(C)(F)(C)(F)(F)                                                                                             | -8.21 | 40.48 | 2.68 | P | IN  |
| QL00976 | 5,5,6,6,7,7,8,8,9,10,10,10-Tridecafluoro-2-methyldecan-2-ol                                                                                | 159142-65-1  | CC(C)(O)CCCC(F)(C)(F)(C)(F)(C)(F)(C)(F)(C)(F)(F)                                                                                                   | -7.44 | 36.11 | 2.44 | P | IN  |
| QL00977 | 5,5,6,6,7,7,8,8-Nonafluoro-2-methyloctan-2-ol (4S,5R)-4-(Propan-2-yl)-5-(3,3,4,4,5,5,6,6,7,7,8,8-tridecafluoroocetyl)-1,3-oxazolidin-2-one | 269394-08-3  | CC(C)(O)CCCC(F)(C)(F)(C)(F)(C)(F)(F)                                                                                                               | -6.48 | 30.00 | 2.17 | P | OUT |
| QL00978 | N-[(ZS)-2-Amino-3-methylbutyl]-1,2,2,3,3,4,4,4-nonafluorobutane-1-sulfonamide                                                              | 871210-22-9  | CC(C)[C@@H]1NC(=O)[C@@H]1CCCC(F)(F)(C)(F)(C)(F)(C)(F)(C)(F)(F)                                                                                     | -7.59 | 29.55 | 2.69 | P | OUT |
| QL00979 | N,N-Dimethyl-N-(propan-2-yl)propan-2-aminium nonafluorobutane-1-sulfonate                                                                  | 1417316-15-4 | CC(C)[C@H](N)CNS(=O)(=O)C(F)(C)(F)(C)(F)(C)(F)(F)                                                                                                  | -6.85 | 25.00 | 2.47 | P | OUT |
| QL00980 | (3,3,4,4,5,5,6,6,7,7,8,8,9,9,10,10,11,11,12,12-Henicosafuorododecyl)di(propan-2-yl)silane ((Perfluorooctyl)ethyl)di(propan-2-yl)silane     | 374571-81-0  | CC(C)[N+](C)(C)(C)(C)[O-][S](=O)(=O)C(F)(C)(F)(C)(F)(C)(F)(F)CC(C)[SiH](CCCC(F)(C)(F)(C)(F)(C)(F)(C)(F)(C)(F)(C)(F)(C)(F)(C)(F)(F)C)C              | -5.81 | 19.57 | 2.14 | P | OUT |
| QL00981 | 356056-16-1                                                                                                                                | 356056-16-1  | CC(C)[SiH](CCCC(F)(C)(F)(C)(F)(C)(F)(C)(F)(C)(F)(C)(F)(C)(F)(C)(F)(F)C)C                                                                           | -8.47 | 35.59 | 2.93 | P | OUT |
| QL00982 | 356056-15-9                                                                                                                                | 356056-15-9  | CC(C)[SiH](CCCC(F)(C)(F)(C)(F)(C)(F)(C)(F)(C)(F)(C)(F)(C)(F)(C)(F)(F)C)C                                                                           | -7.82 | 32.08 | 2.73 | P | OUT |
| QL00983 | Di(propan-2-yl)(3,3,4,4,5,5,6,6,7,7,8,8,8-tridecafluoroocetyl)silane                                                                       | 356056-14-9  | CC(C)[SiH](CCCC(F)(C)(F)(C)(F)(C)(F)(C)(F)(C)(F)(C)(F)(C)(C)(C)                                                                                    | -7.06 | 27.66 | 2.49 | P | OUT |
| QL00984 | (3,3,4,4,5,5,6,6,6-Nonafluorohexyl)di(propan-2-yl)silane                                                                                   | 356056-13-8  | CC(C)[SiH](CCCC(F)(C)(F)(C)(F)(C)(F)(F)(C)(C)(C)CC(C)=C(C)(C(=O)C)(F)(C)(F)(C)(F)(F)=P(C1=CC=CC=C1)(C1=CC=CC=C1)C1=CC=CC=C1)C(F)(F)(C)(F)(C)(F)(F) | -6.13 | 21.95 | 2.22 | P | OUT |
| QL00985 | 6-(1-Methylethylidene)-5-(triphenylphosphoranylidene)-(perfluoro)-nonan-4-one                                                              | 139225-92-6  | 1)C(F)(F)(C)(F)(C)(F)(F)                                                                                                                           | -6.20 | 20.90 | 2.28 | P | OUT |
| QL00986 | 7,7,8,8,9,9-Heptafluoro-2-methylnon-2-ene-4,6-dione                                                                                        | 559-99-9     | CC(C)=CC(=O)CC(=O)C(F)(C)(F)(C)(F)(F)                                                                                                              | -6.37 | 25.00 | 2.25 | P | OUT |
| QL00987 | 5,6,6,7,7,8,8-Octafluoro-2-methylocta-2,4-diene                                                                                            | 90292-28-7   | CC(C)=CC=C(C)(F)(C)(F)(C)(F)(F)                                                                                                                    | -6.63 | 32.00 | 2.18 | P | OUT |
| QL00988 | 5,5,6,6,7,7,8,8-Nonafluoro-2-methyloct-2-ene                                                                                               | 97294-02-5   | CC(C)=CCC(F)(C)(F)(C)(F)(C)(F)(F)                                                                                                                  | -6.72 | 33.33 | 2.19 | P | IN  |
| QL00989 | 2-Methylprop-1-en-1-yl nonafluorobutane-1-sulfonate                                                                                        | 84224-48-6   | CC(C)=COS(=O)(=O)C(F)(C)(F)(C)(F)(C)(F)(F)                                                                                                         | -6.77 | 32.14 | 2.24 | P | OUT |
| QL00990 | 1,1,1,2-Tetrafluoro-4-methyl-2-(trifluoromethyl)pentan-3-one                                                                               | 62656-72-8   | CC(C)C(=O)C(F)(C)(F)(C)(F)(F)                                                                                                                      | -4.90 | 31.82 | 1.40 | P | OUT |
| QL00991 | 3,3,4,4,5,5,6,6,7,7,8,8-tridecafluoroocetyl 2-methylpropanoate                                                                             | 242812-05-1  | CC(C)C(=O)OCCC(F)(F)(C)(F)(C)(F)(C)(F)(C)(F)(F)(F)                                                                                                 | -7.91 | 34.21 | 2.71 | P | OUT |
| QL00992 | 3,3,4,4,5,5,6,6,6-Nonafluorohexyl 2,2-difluoro-3-hydroxy-4-methylpentanoate                                                                | 1370345-78-0 | CC(C)C(O)(C)(F)(C(=O)O)CCC(F)(F)(C)(F)(C)(F)(C)(F)(F)                                                                                              | -7.35 | 28.21 | 2.61 | P | OUT |
| QL00993 | 1-(1,3-Dimethylbutoxy)-2-(perfluorohexyl)ethane                                                                                            | 210896-25-6  | CC(C)CC(C)OCCC(F)(F)(C)(F)(C)(F)(F)(C)(F)(C)(F)(F)                                                                                                 | -7.72 | 28.89 | 2.76 | P | OUT |
| QL00994 | 3-Methylbutyl heptadecafluorononanoate                                                                                                     | 117374-32-0  | CC(C)CCOC(=O)C(F)(C)(F)(C)(F)(C)(F)(C)(F)(C)(F)(C)(F)(F)                                                                                           | -8.59 | 38.64 | 2.90 | P | IN  |
| QL00995 | 3-Methylbutyl 2,3,3,3-tetrafluoro-2-(heptafluoropropoxy)propanoate                                                                         | 183873-56-5  | CC(C)CCOC(=O)C(F)(OC(F)(F)(C)(F)(C)(F)(F)(F)(F)                                                                                                    | -7.31 | 30.56 | 2.53 | P | OUT |
| QL00996 | Disopentyl 2-[(2,2,3,3,4,4,4-heptafluorobutanoyl)amino]succinate                                                                           | 75743-06-5   | CC(C)CCOC(=O)CC(NC(=O)C(F)(F)(C)(F)(C)(F)(F)(C(=O)O)CCC(C)C                                                                                        | -6.67 | 12.28 | 2.72 | P | OUT |
| QL00997 | 2,2,3,3,4,4,4-Heptafluoro-N,N-bis(2-methylpropyl)butanamide                                                                                | 336-30-1     | CC(C)CN(C(C)(C)C(=O)C)(F)(C)(F)(C)(F)(F)                                                                                                           | -5.69 | 17.95 | 2.12 | P | OUT |
| QL00998 | 2,2,3,3,4,4,4-Heptafluoro-N-[2-(methylpropyl)butanamide                                                                                    | 75668-25-6   | CC(C)CNC(=O)C(F)(F)(C)(F)(C)(F)                                                                                                                    | -6.28 | 25.93 | 2.18 | P | OUT |
| QL00999 | Tris(2-methylpropyl) 3-(2,2,3,3,4,4,4-heptafluorobutanamido)propane-1,1                                                                    |              |                                                                                                                                                    |       |       |      |   |     |

[illegible]





|         |                                                                                                                     |              |                                                                                      |       |       |      |   |     |
|---------|---------------------------------------------------------------------------------------------------------------------|--------------|--------------------------------------------------------------------------------------|-------|-------|------|---|-----|
| QL01122 | 4-(1,1,1,2,3,3,3-Heptafluoropropan-2-yl)-3-(methanesulfonyl)-2-methylbenzoic acid                                   | 1355554-41-4 | Cc1c(ccc(c1S(C)=O)=O)C(F)(C(F)(F)(F)C(F)C(O)=O                                       | -6.02 | 21.21 | 2.19 | P | OUT |
| QL01123 | 4-(1,1,1,2,3,3,3-Heptafluoropropan-2-yl)-3-(methanesulfinyl)-2-methylbenzoic acid                                   | 1355554-19-6 | Cc1c(ccc(c1S(C)=O)C(F)(C(F)(F)(F)C(F)C(O)=O                                          | -6.06 | 21.88 | 2.19 | P | OUT |
| QL01124 | 3-(tert-Butylsulfonyl)-4-(1,1,1,2,3,3,3-heptafluoropropan-2-yl)-2-methylbenzoic acid                                | 1355554-16-3 | Cc1c(ccc(c1S(C)(C)(C)C(F)(C(F)(F)(F)C(F)C(O)=O                                       | -5.64 | 17.50 | 2.11 | P | OUT |
| QL01125 | 3-Methyl-2-(nonafluorobutyl)-1H-indole                                                                              | 1622133-36-1 | Cc1c(Nc2ccccc12)C(F)(F)(C(F)(F)(C(F)(F)F                                             | -6.60 | 29.03 | 2.25 | P | OUT |
| QL01126 | 2-(Heptafluoropropyl)-3-methyl-1H-indole                                                                            | 103606-42-8  | Cc1c(Nc2ccccc12)C(F)(C(F)(F)(C(F)(F)F                                                | -6.15 | 25.00 | 2.15 | P | OUT |
| QL01127 | 5-Methyl-6-[(3,3,4,4,5,5,6,6,7,7,8,8,8-tridecafluorooctyl)sulfonyl]hexahydro-4,7-methano-2-benzofuran-1,3-dione     | 94413-32-8   | CC1C2CC(C1SCCC(F)(F)(C(F)(F)(F)(C(F)(F)(C(F)(F)C1C2C(=O)OC1=O                        | -7.83 | 26.00 | 2.89 | P | OUT |
| QL01128 | 6-[(4,6-Dimethylpyrimidin-2-yl)sulfonyl]-3-(heptafluoropropyl)[1,2,4]triazolo[4,3-b]pyridazine                      | 351346-36-6  | Cc1cc(C)nc[Sc2ccc3nnc(n3n2)C(F)(C(F)(F)(C(F)(F)F)n1                                  | -6.97 | 18.92 | 2.68 | P | OUT |
| QL01129 | 2-Bromo-4-(1,1,1,2,3,3,3-heptafluoropropan-2-yl)-6-methylaniline                                                    | 1770825-71-2 | Cc1cc(cc(Br)c1N(C)C(F)(C(F)(F)(F)C(F)F                                               | -5.93 | 30.77 | 1.90 | P | OUT |
| QL01130 | 2-Bromo-5-(1,1,1,2,3,3,3-heptafluoropropan-2-yl)-1,3-dimethylbenzene                                                | 353272-55-6  | Cc1cc(cc(C)c1Br)C(F)(C(F)(F)(C(F)(F)F                                                | -5.86 | 29.63 | 1.90 | P | OUT |
| QL01131 | 4-(1,1,1,2,3,3,3-Heptafluoropropan-2-yl)-2,6-dimethylbenzaldehyde                                                   | 1771743-29-3 | Cc1cc(cc(C)c1C=O)C(F)(C(F)(F)(C(F)(F)F                                               | -6.21 | 24.14 | 2.20 | P | OUT |
| QL01132 | 4-(1,1,1,2,3,3,3-Heptafluoropropan-2-yl)-2,6-dimethylaniline                                                        | 273735-43-6  | Cc1cc(cc(C)c1N(C)C(F)(C(F)(F)(C(F)(F)F                                               | -5.55 | 24.14 | 1.90 | P | OUT |
| QL01133 | 3-Benzamido-2,6-difluoro-N-[4-(1,1,1,2,3,3,3-heptafluoropropan-2-yl)-2,6-dimethylphenyl]benzamide                   | 862133-36-6  | Cc1cc(cc(C)c1NC(=O)c1c(F)ccc(NC(=O)c2ccccc2)c1F)C(F)(C(F)(F)C(F)(F)F                 | -7.71 | 16.36 | 3.09 | P | OUT |
| QL01134 | 5-Benzamido-2,4-dibromo-N-[4-(1,1,1,2,3,3,3-heptafluoropropan-2-yl)-2,6-dimethylphenyl]benzamide                    | 862133-37-7  | Cc1cc(cc(C)c1NC(=O)c1cc(NC(=O)c2ccccc2)c(Br)cc1Br)C(F)(C(F)(F)C(F)(F)F               | -7.70 | 16.36 | 3.08 | P | OUT |
| QL01135 | 2,4-Difluoro-N-{2-fluoro-5-[[4-(1,1,1,2,3,3,3-heptafluoropropan-2-yl)-2,6-dimethylphenyl]carbamoyl]phenyl}benzamide | 862133-29-7  | Cc1cc(cc(C)c1NC(=O)c1cccc(F)c(NC(=O)c2ccc(F)cc2F)c1)C(F)(C(F)(F)C(F)(F)F             | -8.05 | 18.18 | 3.20 | P | OUT |
| QL01136 | 2,3,4,5,6-Pentafluoro-N-{3-[[4-(1,1,1,2,3,3,3-heptafluoropropan-2-yl)-2,6-dimethylphenyl]carbamoyl]phenyl}benzamide | 862130-96-9  | Cc1cc(cc(C)c1NC(=O)c1cccc(NC(=O)c2c(F)c(C(F)(F)(F)C(F)(F)C(F)(F)F                    | -8.22 | 21.82 | 3.18 | P | OUT |
| QL01137 | 2,3,6-Trifluoro-N-{3-[[4-(1,1,1,2,3,3,3-heptafluoropropan-2-yl)-2,6-dimethylphenyl]carbamoyl]phenyl}benzamide       | 862130-95-8  | Cc1cc(cc(C)c1NC(=O)c1cccc(NC(=O)c2c(F)ccc(F)c2F)c1)C(F)(C(F)(F)C(F)(F)F              | -7.71 | 18.18 | 3.04 | P | OUT |
| QL01138 | 2,5-Difluoro-N-{3-[[4-(1,1,1,2,3,3,3-heptafluoropropan-2-yl)-2,6-dimethylphenyl]carbamoyl]phenyl}benzamide          | 862130-67-4  | Cc1cc(cc(C)c1NC(=O)c1cccc(NC(=O)c2cc(F)ccc2F)c1)C(F)(C(F)(F)C(F)(F)F                 | -7.63 | 16.36 | 3.05 | P | OUT |
| QL01139 | 4-Chloro-N-{3-[[4-(1,1,1,2,3,3,3-heptafluoropropan-2-yl)-2,6-dimethylphenyl]carbamoyl]phenyl}-2-nitrobenzamide      | 862130-91-4  | Cc1cc(cc(C)c1NC(=O)c1cccc(NC(=O)c2ccc(Cl)cc2[N+]([O-])=O)c1)C(F)(C(F)(F)C(F)(F)F     | -7.77 | 14.04 | 3.18 | P | OUT |
| QL01140 | 3-(4-Chloro-2-nitrobenzamido)-2-fluoro-N-[4-(1,1,1,2,3,3,3-heptafluoropropan-2-yl)-2,6-dimethylphenyl]benzamide     | 862133-18-4  | Cc1cc(cc(C)c1NC(=O)c1cccc(NC(=O)c2ccc(Cl)cc2[N+]([O-])=O)c1F)C(F)(C(F)(F)C(F)(F)F    | -7.87 | 15.79 | 3.18 | P | OUT |
| QL01141 | 2,4-Dichloro-N-{3-[[4-(1,1,1,2,3,3,3-heptafluoropropan-2-yl)-2,6-dimethylphenyl]carbamoyl]phenyl}benzamide          | 862130-69-6  | Cc1cc(cc(C)c1NC(=O)c1cccc(NC(=O)c2ccc(Cl)cc2Cl)c1)C(F)(C(F)(F)C(F)(F)F               | -7.93 | 16.36 | 3.19 | P | OUT |
| QL01142 | 4-Chloro-2-fluoro-N-{3-[[4-(1,1,1,2,3,3,3-heptafluoropropan-2-yl)-2,6-dimethylphenyl]carbamoyl]phenyl}benzamide     | 862130-90-3  | Cc1cc(cc(C)c1NC(=O)c1cccc(NC(=O)c2ccc(Cl)cc2F)c1)C(F)(C(F)(F)C(F)(F)F                | -7.93 | 16.36 | 3.19 | P | OUT |
| QL01143 | 3-(4-Chloro-2-fluorobenzamido)-2-fluoro-N-[4-(1,1,1,2,3,3,3-heptafluoropropan-2-yl)-2,6-dimethylphenyl]benzamide    | 862133-16-2  | Cc1cc(cc(C)c1NC(=O)c1cccc(NC(=O)c2ccc(Cl)cc2F)c1F)C(F)(C(F)(F)C(F)(F)F               | -8.03 | 18.18 | 3.19 | P | OUT |
| QL01144 | 2-Fluoro-3-(4-fluoro-2-nitrobenzamido)-N-[4-(1,1,1,2,3,3,3-heptafluoropropan-2-yl)-2,6-dimethylphenyl]benzamide     | 862133-14-0  | Cc1cc(cc(C)c1NC(=O)c1cccc(NC(=O)c2ccc(F)cc2[N+](([O-])=O)c1)C(F)(C(F)(F)C(F)(F)F     | -7.87 | 15.79 | 3.18 | P | OUT |
| QL01145 | 2-Chloro-4-fluoro-N-{3-[[4-(1,1,1,2,3,3,3-heptafluoropropan-2-yl)-2,6-dimethylphenyl]carbamoyl]phenyl}benzamide     | 862130-87-8  | Cc1cc(cc(C)c1NC(=O)c1cccc(NC(=O)c2ccc(F)cc2Cl)c1)C(F)(C(F)(F)C(F)(F)F                | -7.93 | 16.36 | 3.19 | P | OUT |
| QL01146 | 3-(2-Chloro-4-fluorobenzamido)-2-fluoro-N-[4-(1,1,1,2,3,3,3-heptafluoropropan-2-yl)-2,6-dimethylphenyl]benzamide    | 862133-15-1  | Cc1cc(cc(C)c1NC(=O)c1cccc(NC(=O)c2ccc(F)cc2Cl)c1F)C(F)(C(F)(F)C(F)(F)F               | -8.03 | 18.18 | 3.19 | P | OUT |
| QL01147 | 2,4-Difluoro-N-{3-[[4-(1,1,1,2,3,3,3-heptafluoropropan-2-yl)-2,6-dimethylphenyl]carbamoyl]phenyl}benzamide          | 862130-66-3  | Cc1cc(cc(C)c1NC(=O)c1cccc(NC(=O)c2ccc(F)cc2F)c1)C(F)(C(F)(F)C(F)(F)F                 | -7.93 | 16.36 | 3.19 | P | OUT |
| QL01148 | 3-methyl-4-(2,2,3,3,4,4,5,5,5-nonafluoropentyl)cyclopentane-1,1-dicarboxylic Acid                                   | 20116-32-9   | CC1CC(Cc1CC(C)(F)(C(F)(F)(C(F)(F)F)(C(O)=O)C(O)=O                                    | -6.54 | 23.08 | 2.38 | P | OUT |
| QL01149 | 4-(1,1,1,2,3,3,3-Heptafluoropropan-2-yl)-2-methyl-1-nitrobenzene                                                    | 238098-38-9  | Cc1cc(ccc1[N+]([O-])=O)C(F)(C(F)(F)(C(F)(F)F                                         | -6.25 | 26.92 | 2.15 | P | OUT |
| QL01150 | 1-Bromo-4-(1,1,1,2,3,3,3-heptafluoropropan-2-yl)-2-methylbenzene                                                    | 353272-53-4  | Cc1cc(ccc1Br)C(F)(C(F)(F)(C(F)(F)F                                                   | -6.10 | 33.33 | 1.90 | P | IN  |
| QL01151 | 2-[4-(1,1,1,2,3,3,3-Heptafluoropropan-2-yl)-2-methylphenyl]-4-iodo-1H-isindole-1,3(2H)-dione                        | 346575-66-4  | Cc1cc(ccc1N1C(=O)c2ccc(l)c1c2C(=O)C(F)(C(F)(F)C(F)(F)F                               | -6.62 | 21.05 | 2.47 | P | OUT |
| QL01152 | Flubendiamide                                                                                                       | 272451-65-7  | Cc1cc(ccc1NC(=O)c1cccc(l)c1C(O)=NC(C)(C)C(C)(=O)=O)C(F)(C(F)(F)C(F)(F)F              | -7.23 | 13.33 | 2.95 | P | OUT |
| QL01153 | N-(2-Methylsulfinyl)-1,1-dimethyl-ethyl)-N'-(2-methyl-4-[perfluoroisopropyl]phenyl)phthalimide                      | 371771-07-2  | Cc1cc(ccc1NC(=O)c1cccc(c1=O)NC(C)(C)C(C)=O)C(F)(C(F)(F)C(F)(F)F                      | -7.22 | 11.86 | 2.99 | P | OUT |
| QL01154 | 4-(Heptafluoropropyl)-7,8-dimethyl-1,3-dihydro-2H-1,5-benzodiazepin-2-one                                           | 505063-74-1  | Cc1cc2NC(=O)CC(=Nc2cc1C)C(F)(C(F)(F)(C(F)(F)F                                        | -6.56 | 20.00 | 2.47 | P | OUT |
| QL01155 | 2-(1,1,1,2,3,3,3-Heptafluoropropan-2-yl)-5-methylcyclohexan-1-ol                                                    | 52450-55-2   | CC1CCCC(C(O)c1)C(F)(C(F)(F)(C(F)(F)F                                                 | -5.52 | 22.58 | 1.93 | P | OUT |
| QL01156 | 1,4-Dimethyl-2-(tridecafluorohexyl)benzene                                                                          | 123524-58-3  | Cc1ccc(C)c(c1)C(F)(C(F)(F)(C(F)(F)(C(F)(F)C(F)(F)F                                   | -7.45 | 36.11 | 2.45 | P | IN  |
| QL01157 | 2,2,3,3,4,4,5,5,6,6,7,7-7-Tridecafluoro-N'-[[4-methylphenyl]methylidene]heptanehydrazide                            | 445258-02-6  | Cc1ccc(C=NNC(=O)C(F)(F)(C(F)(F)(C(F)(F)(F)C(F)(F)F)cc1                               | -8.35 | 32.50 | 2.96 | P | OUT |
| QL01158 | 1-(Heptafluorooctyl)-4-methylbenzene                                                                                | 82396-51-8   | Cc1ccc(cc1)C(F)(C(F)(F)(C(F)(F)(C(F)(F)C(F)(F)C(F)(F)F                               | -8.52 | 43.59 | 2.74 | P | IN  |
| QL01159 | 1-Methyl-4-(tridecafluorohexyl)benzene                                                                              | 128720-26-3  | Cc1ccc(cc1)C(F)(C(F)(F)(C(F)(F)(C(F)(F)C(F)(F)F                                      | -7.79 | 39.39 | 2.52 | P | IN  |
| QL01160 | 1-(3,3,4,4,5,5,6,6,7,7,8,8,9,9,10,10,10-heptafluorodecyl)pyridinium toluene-p-sulphonate                            | 61798-68-3   | Cc1ccc(cc1S(=O)(=O)[O-].F(C(F)(F)(F)(C(F)(F)(C(F)(F)(C(F)(F)(C(F)(F)C(C[n+]+)2ccccc2 | -9.24 | 28.33 | 3.47 | P | OUT |



[illegible]

|         |                                                                                                                                               |              |                                                                                                                       |       |       |      |   |     |
|---------|-----------------------------------------------------------------------------------------------------------------------------------------------|--------------|-----------------------------------------------------------------------------------------------------------------------|-------|-------|------|---|-----|
| QL01210 | 1,1,1,2,2,3,3,4,4,5,5,6,6,7,7,8,8-Heptadecafluoro-10-iodododecane                                                                             | 99325-00-5   | CCC(I)CC(F)(F)C(F)(F)C(F)(F)C(F)(F)C(F)(F)C(F)(F)C(F)(F)C(F)(F)F                                                      | -8.62 | 47.37 | 2.69 | P | IN  |
| QL01211 | 5,5,6,6,7,7,7-Heptafluoroheptan-3-amine<br>4-{(2-[2,4-Bis(2-methylbutan-2-yl)phenoxy]butanamido)-2-hydroxy-N-(nonafluorobutyl)benzamide       | 679-00-5     | CCC(N)CC(F)(F)C(F)(F)C(F)(F)F                                                                                         | -5.85 | 28.00 | 1.93 | P | OUT |
| QL01212 | Tetrapropylammonium perfluorooctanoate                                                                                                        | 94705-65-4   | CCC(OC1ccc(cc1C(C)C)C)C(C)C(C)C(C)=O)Nc1ccc(C(=O)NC(F)(F)C(F)(F)C(F)(F)C(F)(F)F                                       | -8.04 | 10.84 | 3.39 | P | OUT |
| QL01213 | 5,5,6,6,7,7,7-Heptafluorohept-3-ene                                                                                                           | 277749-00-5  | CCC[N+](CCC)(CCC)CCC.[O-]C[=O]C(F)(F)C(F)(F)C(F)(F)C(F)(F)C(F)(F)C(F)(F)F                                             | -7.08 | 22.73 | 2.63 | P | OUT |
| QL01214 | Orthobutyric acid, heptafluoro-, cyclic ester with 2-ethyl-2-(hydroxymethyl)-1,3-propanediol (11)                                             | 355-98-6     | CCC=CC(F)(F)C(F)(F)C(F)(F)F                                                                                           | -6.20 | 33.33 | 1.95 | P | IN  |
| QL01215 | 2-Ethyl-4-(1,1,1,2,3,3,3-heptafluoropropan-2-yl)-3-(2-methylpropane-2-sulfonyl)benzoic acid                                                   | 31185-68-9   | CCC12COC(OC1)(OC2)C(F)(F)C(F)(F)C(F)(F)F                                                                              | -6.39 | 22.58 | 2.32 | P | OUT |
| QL01216 | 2-Ethyl-4-(1,1,1,2,3,3,3-heptafluoropropan-2-yl)-3-(2-methylpropane-2-sulfonyl)benzoic acid                                                   | 1355555-26-8 | Cc1c(ccc(c1S(=O)=O)=O)C(C)C(C)C(F)(C(F)F)C(F)(F)C(F)(F)C(O)=O                                                         | -5.51 | 15.56 | 2.11 | P | OUT |
| QL01217 | 2-Ethyl-4-(1,1,1,2,3,3,3-heptafluoropropan-2-yl)-3-(propane-2-sulfonyl)benzoic acid                                                           | 1355555-15-5 | Cc1c(ccc(c1S(=O)=O)=O)C(C)C(C)C(F)(C(F)F)C(F)(F)C(F)(F)C(O)=O                                                         | -5.59 | 16.67 | 2.11 | P | OUT |
| QL01218 | 2-Ethyl-4-(1,1,1,2,3,3,3-heptafluoropropan-2-yl)-3-(2-methylpropane-1-sulfonyl)benzoic acid                                                   | 1355555-21-3 | Cc1c(ccc(c1S(=O)=O)=O)CC(C)C(C)C(F)(C(F)F)C(F)(F)C(F)(F)C(O)=O                                                        | -5.38 | 15.56 | 2.05 | P | OUT |
| QL01219 | 3-(Ethanesulfonyl)-2-ethyl-4-(1,1,1,2,3,3,3-heptafluoropropan-2-yl)benzoic acid                                                               | 1355555-11-1 | Cc1c(ccc(c1S(=O)=O)CC)C(F)(C(F)F)C(F)(F)C(F)(F)C(O)=O                                                                 | -5.67 | 17.95 | 2.12 | P | OUT |
| QL01220 | 2-Ethyl-4-(1,1,1,2,3,3,3-heptafluoropropan-2-yl)-3-(2-methylpropane-2-sulfinyl)benzoic acid                                                   | 1355555-05-3 | Cc1c(ccc(c1S(=O)C(C)C(C)C)C(F)(C(F)F)C(F)(F)C(F)(F)C(O)=O                                                             | -5.53 | 15.91 | 2.11 | P | OUT |
| QL01221 | 2-Ethyl-4-(1,1,1,2,3,3,3-heptafluoropropan-2-yl)-3-(propane-2-sulfinyl)benzoic acid                                                           | 1355554-94-7 | Cc1c(ccc(c1S(=O)C(C)C(C)C)C(F)(C(F)F)C(F)(F)C(F)(F)C(O)=O                                                             | -5.62 | 17.07 | 2.12 | P | OUT |
| QL01222 | 2-Ethyl-4-(1,1,1,2,3,3,3-heptafluoropropan-2-yl)-3-(2-methylpropane-1-sulfinyl)benzoic acid                                                   | 1355554-99-2 | Cc1c(ccc(c1S(=O)CC(C)C(C)C)C(F)(C(F)F)C(F)(F)C(F)(F)C(O)=O                                                            | -5.40 | 15.91 | 2.05 | P | OUT |
| QL01223 | 3-(Ethanesulfinyl)-2-ethyl-4-(1,1,1,2,3,3,3-heptafluoropropan-2-yl)benzoic acid                                                               | 1355554-87-8 | Cc1c(ccc(c1S(=O)CC)C(F)(C(F)F)C(F)(F)C(F)(F)C(O)=O                                                                    | -5.71 | 18.42 | 2.12 | P | OUT |
| QL01224 | 2-Ethyl-4-(1,1,1,2,3,3,3-heptafluoropropan-2-yl)-3-(methanesulfonyl)benzoic acid                                                              | 1355555-09-7 | Cc1c(ccc(c1S(C)=O)=O)C(F)(C(F)F)C(F)(F)C(F)(F)C(O)=O                                                                  | -5.80 | 19.44 | 2.13 | P | OUT |
| QL01225 | 2-Ethyl-4-(1,1,1,2,3,3,3-heptafluoropropan-2-yl)-3-(methanesulfinyl)benzoic acid                                                              | 1355554-84-5 | Cc1c(ccc(c1S(C)=O)C(F)(C(F)F)C(F)(F)C(F)(F)C(O)=O                                                                     | -5.83 | 20.00 | 2.13 | P | OUT |
| QL01226 | 2-Ethyl-4-(1,1,1,2,3,3,3-heptafluoropropan-2-yl)-3-[[propan-2-yl)sulanyl]benzoic acid                                                         | 1355554-70-9 | Cc1c(ccc(c1SC(C)C(C)C)C(F)(C(F)F)C(F)(F)C(F)(F)C(O)=O                                                                 | -5.64 | 17.50 | 2.11 | P | OUT |
| QL01227 | 2-Ethyl-4-(1,1,1,2,3,3,3-heptafluoropropan-2-yl)-3-[[2-methylpropyl)sulanyl]benzoic acid                                                      | 1355554-74-3 | Cc1c(ccc(c1SCC(C)C(C)C)C(F)(C(F)F)C(F)(F)C(F)(F)C(O)=O                                                                | -5.40 | 16.28 | 2.04 | P | OUT |
| QL01228 | 3-(tert-Butylsulfonyl)-2-ethyl-4-(1,1,1,2,3,3,3-heptafluoropropan-2-yl)benzoic acid                                                           | 1355554-81-2 | Cc1c(SC(C)C(C)C)cccc1C(O)=O)C(F)(C(F)F)C(F)(F)C(F)(F)F                                                                | -5.54 | 16.28 | 2.10 | P | OUT |
| QL01229 | 2-Ethyl-4-(1,1,1,2,3,3,3-heptafluoropropan-2-yl)-3-(methylsulfonyl)benzoic acid                                                               | 1355554-62-9 | Cc1c(SC)ccccc1C(O)=O)C(F)(C(F)F)C(F)(F)F                                                                              | -5.84 | 20.59 | 2.12 | P | OUT |
| QL01230 | 2-Chloro-6-ethyl-4-(1,1,1,2,3,3,3-heptafluoropropan-2-yl)aniline                                                                              | 1630969-89-9 | Cc1ccc(cc(C)Cl)N(C(F)(C(F)F)C(F)(F)F                                                                                  | -5.64 | 27.59 | 1.85 | P | OUT |
| QL01231 | 2-Ethyl-4-(1,1,1,2,3,3,3-heptafluoropropan-2-yl)aniline N'-{[(4-Ethylphenyl)methyldiene]-2,2,3,3,4,4,5,5,6,6,7,7-tridecafluoroheptaneydiazide | 273735-34-5  | Cc1ccc(ccc1N)C(F)(C(F)F)C(F)(F)F                                                                                      | -5.44 | 24.14 | 1.85 | P | OUT |
| QL01232 | N-(2-Ethylphenyl)-2,2,3,3,4,4,4-heptafluorobutanamide                                                                                         | 445258-05-9  | Cc1cccc(C=NCC(=O)C(F)(F)C(F)(F)C(F)(F)C(F)(F)C(F)(F)C(F)(F)Cc1                                                        | -8.46 | 30.23 | 3.06 | P | OUT |
| QL01233 | 1,1,1,2,2,3,3-Hepthafluoroheptan-4-one                                                                                                        | 51814-65-4   | Cc1cccc1NC(=O)C(F)(F)C(F)(F)F                                                                                         | -6.18 | 22.58 | 2.23 | P | OUT |
| QL01234 | 2,2,3,3,4,4,4-Hepthafluorobutyl butanoate                                                                                                     | 425-22-9     | CCCC(=O)C(F)(F)C(F)(F)C(F)(F)F                                                                                        | -6.07 | 31.82 | 1.93 | P | OUT |
| QL01235 | 2,2,3,3,4,4,4-Hepthafluorobutyl butanoate                                                                                                     | 2926-44-5    | CCCC(=O)OCC(F)(F)C(F)(F)C(F)(F)F                                                                                      | -6.43 | 26.92 | 2.23 | P | OUT |
| QL01236 | 1,1,1,2,2,3,3,4,4,5,5,6,6,7,7,8,8,9,9,10,10-Henicosafuorotridecane                                                                            | 1835251-22-3 | CCCC(F)(F)C(F)(F)C(F)(F)C(F)(F)C(F)(F)C(F)(F)C(F)(F)C(F)(F)C(F)(F)C(F)(F)C(F)(F)C(F)(F)F                              | -8.95 | 51.22 | 2.73 | P | IN  |
| QL01237 | 1,1,1,2,2,3,3,4,4,5,5,6,6,7,7,8,8-Heptadecafluoroundecane                                                                                     | 1835250-28-6 | CCCC(F)(F)C(F)(F)C(F)(F)C(F)(F)C(F)(F)C(F)(F)C(F)(F)C(F)(F)C(F)(F)F                                                   | -8.29 | 48.57 | 2.50 | P | IN  |
| QL01238 | 1,1,1,2,2,3,3,4,4,5,5,6,6-Tridecafluorononane                                                                                                 | NOCAS_871521 | CCCC(F)(F)C(F)(F)C(F)(F)C(F)(F)C(F)(F)C(F)(F)C(F)(F)F                                                                 | -7.48 | 44.83 | 2.23 | P | IN  |
| QL01239 | 1,1,1,2,2,3,3,4,4,5,5-Undecafluorooctane                                                                                                      | 1645298-12-9 | CCCC(F)(F)C(F)(F)C(F)(F)C(F)(F)C(F)(F)C(F)(F)F                                                                        | -7.19 | 42.31 | 2.17 | P | IN  |
| QL01240 | 1,1,1,2,2,3,3,4,4-Nonafluoroheptane                                                                                                           | 154381-51-8  | CCCC(F)(F)C(F)(F)C(F)(F)C(F)(F)F                                                                                      | -6.43 | 39.13 | 1.91 | P | IN  |
| QL01241 | 1,2,4,5-Benzenetetracarboxylic acid, mixed 3-chloro-2-hydroxypropyl and -gamma--omega--perfluoro-C8-10-alkyl esters                           | 68954-01-8   | CCCC(F)(F)C(F)(F)C(F)(F)CCCC(C(C)COC(=O)c1cc(C(O)=O)cc1C(=O)OCC(O)CC)C(=O)OCC(O)CC                                    | -8.28 | 11.11 | 3.49 | P | OUT |
| QL01242 | 1,1,1,2,2,3,3-Hepthafluorohexane                                                                                                              | 678-98-8     | CCCC(F)(F)C(F)(F)C(F)(F)F                                                                                             | -6.08 | 35.00 | 1.85 | P | IN  |
| QL01243 | 1,1,1,2,2,3,3,4,4,5,5,6,6,7,7-Pentadecafluoro-9-iodododecane                                                                                  | 25431-48-5   | CCCC(I)CC(F)(F)C(F)(F)C(F)(F)C(F)(F)C(F)(F)C(F)(F)C(F)(F)F                                                            | -8.34 | 42.11 | 2.70 | P | IN  |
| QL01244 | 1,1,1,2,2,3,3-heptafluoroheptan-4-ol                                                                                                          | 425-21-8     | CCCC(O)C(F)(F)C(F)(F)C(F)(F)F                                                                                         | -5.92 | 29.17 | 1.93 | P | OUT |
| QL01245 | N,N-Dibutyl-N-methylbutan-1-aminium heptadecafluorooctane-1-sulfonate                                                                         | 124472-68-0  | CCCC[N+](C)(CCCC)CCCC.[O-]S(=O)(=O)C(F)(F)C(F)(F)C(F)(F)C(F)(F)C(F)(F)C(F)(F)C(F)(F)F                                 | -7.15 | 23.29 | 2.65 | P | OUT |
| QL01246 | N,N-Dibutyl-N-methylbutan-1-aminium nonafluorobutane-1-sulfonate                                                                              | 124472-66-8  | CCCC[N+](C)(CCCC)CCCC.[O-]S(=O)(=O)C(F)(F)C(F)(F)C(F)(F)C(F)(F)F                                                      | -5.85 | 14.75 | 2.28 | P | OUT |
| QL01247 | Tetrabutylammonium perfluorooctanesulfonate                                                                                                   | 111873-33-7  | CCCC[N+](CCCC)(CCCC)CCCC.[O-]S(=O)(=O)C(F)(F)C(F)(F)C(F)(F)C(F)(F)C(F)(F)F                                            | -6.96 | 20.73 | 2.63 | P | OUT |
| QL01248 | N,N,N-Tributylbutan-1-aminium nonafluorobutane-1-sulfonate                                                                                    | 108427-52-7  | CCCC[N+](CCCC)(CCCC)CCCC.[O-]S(=O)(=O)C(F)(F)C(F)(F)C(F)(F)C(F)(F)F                                                   | -5.82 | 12.86 | 2.32 | P | OUT |
| QL01249 | Perfluoro(4-[[4-ethyl-3,4-dimethylhex-2-en-2-yl]oxy])benzene-1-sulfonate tributylammonium                                                     | 70729-63-4   | CCCC[NH+](CCCC)CCCC.[O-]S(=O)(=O)C1=CC=C(C(OC1=CC(F)(F)C(C(F)F)C(F)(F)C(F)(F)C(F)(F)C(F)(F)F)C(F)(F)C(F)(F)F)C(F)(F)F | -7.84 | 22.35 | 2.99 | P | OUT |
| QL01250 | Tetrabutylphosphonium perfluorobutanesulfonate                                                                                                | 220689-12-3  | CCCC[PH+](CCCC)(CCCC)CCCC.[O-]S(=O)(=O)C(F)(F)C(F)(F)C(F)(F)C(F)(F)F                                                  | -5.81 | 12.68 | 2.32 | P | OUT |
| QL01251 | 1-(Butylselanyl)-2,2,3,3,4,4-heptafluorobutan-1-ol                                                                                            | 1092379-04-8 | CCCC[Se](O)C(F)(F)C(F)(F)C(F)(F)F                                                                                     | -6.43 | 25.00 | 2.28 | P | OUT |
| QL01252 | 1,1,1,2,2,3,3-Heptafluorooct-4-ene                                                                                                            | 2707-72-4    | CCCC=CC(F)(F)C(F)(F)C(F)(F)F                                                                                          | -6.44 | 29.17 | 2.17 | P | OUT |
| QL01253 | 2-Ethylhexyl 2,3,3,3-tetrafluoro-2-(heptafluoropropoxy)propanoate                                                                             | 340034-61-9  | CCCC(C)COC(=O)C(F)(OC(F)(F)C(F)(F)C(F)(F)C(F)(F)F                                                                     | -7.41 | 24.44 | 2.74 | P | OUT |

[illegible]



[illegible]

[illegible]







[illegible]

[illegible]

[illegible]



|         |                                                                                                                        |              |                                                                                                                 |       |       |      |   |     |
|---------|------------------------------------------------------------------------------------------------------------------------|--------------|-----------------------------------------------------------------------------------------------------------------|-------|-------|------|---|-----|
| QL01695 | N,N-Dimethyl-3-((perfluorohexyl)ethylsulfonyl)aminopropanamine<br>N-oxide                                              | 80475-32-7   | CN(CCCC[NH+](O))S(=O)(=O)CCCC(F)(F)(F)(F)(F)(F)(F)(F)(F)(F)(F)(F)(F)(F)(F)                                      | -7.92 | 26.53 | 2.91 | P | OUT |
| QL01696 | N-[4-(Dimethylamino)butyl]-2,2,3,3,4,4,5,5,6,6,7,7,8,8,8-pentadecafluorooctanamide                                     | 118454-01-6  | CN(C)CCCCNC(=O)C(F)(F)(F)(F)(F)(F)(F)(F)(F)(F)(F)(F)(F)(F)(F)                                                   | -8.33 | 31.91 | 2.96 | P | OUT |
| QL01697 | 1-Propanesulfonic acid, 3-[[3-(dimethylamino)propyl]](tridecafluoroethyl)sulfonyl]amino)-2-hydroxy-, monosodium salt   | 73772-32-4   | CN(C)CCCN(CC(CS(=O)=O)(O))OS(=O)=O)C(C)(C)(C)(F)(F)(F)(F)(F)(F)(F)(F).[Na+]                                     | -7.54 | 23.21 | 2.83 | P | OUT |
| QL01698 | 1-((3-(Dimethylamino)propyl)amino)-(3-(perfluorooctyl))propan-2-ol                                                     | 94159-81-6   | CN(C)CCCNCC(O)CC(F)(F)(F)(F)(F)(F)(F)(F)(F)(F)(F)(F)(F)(F)(F)                                                   | -8.65 | 30.91 | 3.14 | P | OUT |
| QL01699 | Perfluorobutane sulfonamido amine                                                                                      | 68555-77-1   | CN(C)CCCSN(=O)=O)C(F)(F)(F)(F)(F)(F)(F)(F)(F)(F)(F)(F)(F)(F)(F)                                                 | -7.01 | 25.00 | 2.54 | P | OUT |
| QL01700 | 62 Fluorotelomer sulfonamide amine                                                                                     | 34455-22-6   | CN(C)CCCSN(=O)=O)CCC(F)(F)(F)(F)(F)(F)(F)(F)(F)(F)(F)(F)(F)(F)(F)                                               | -7.95 | 27.08 | 2.92 | P | OUT |
| QL01701 | 1,1,2,2,3,3,4,4,5,5,6,6-Tridecafluoro-N,N-dimethylhexane-1-sulfonamide                                                 | 1270179-82-2 | CN(C)S(=O)=O)C(F)(F)(C)(F)(F)(C)(F)(F)(C)(F)(F)(C)(F)(F)(F)                                                     | -7.32 | 41.94 | 2.24 | P | IN  |
| QL01702 | N-{3-[(3,3,4,4,5,5,6,6,7,7,8,8,9,9,10,10,10-Heptadecafluorodecyl)sulfonyl]-2-hydroxypropyl}-N-methylglycine            | 93128-66-6   | CN(CC(O)SCCCC(F)(F)(C)(F)(F)(C)(F)(F)(C)(F)(F)(C)(F)(F)(F)CC(O)=O                                               | -8.88 | 31.48 | 3.23 | P | OUT |
| QL01703 | Isooctanesulfonamide, heptadecafluoro-N-(2-hydroxyethyl)-N-methyl-                                                     | 93894-65-6   | CN(CCO)[S](=O)=O)C(F)(F)(C)(F)(F)(C)(F)(F)(C)(F)(F)(C)(F)(F)(F)                                                 | -8.25 | 41.46 | 2.67 | P | IN  |
| QL01704 | N-(2-hydroxyethyl)-N-methylperfluoro-2-methylpropanesulfonamide                                                        | 93762-11-9   | CN(CCO)[S](=O)=O)C(F)(F)(C)(F)(C)(F)(F)(C)(F)(F)                                                                | -6.48 | 31.03 | 2.14 | P | OUT |
| QL01705 | 1-Pentanesulfonamide, 1,1,2,2,3,3,4,4,5,5-undecafluoro-N-(2-hydroxyethyl)-N-methyl-                                    | 68555-74-8   | CN(CCO)[S](=O)=O)C(F)(F)(C)(F)(F)(C)(F)(F)(C)(F)(F)                                                             | -7.36 | 34.38 | 2.45 | P | IN  |
| QL01706 | 1-Butanesulfonamide, 1,1,2,2,3,3,4,4,4-nonafluoro-N-(2-hydroxyethyl)-N-methyl-                                         | 34454-97-2   | CN(CCO)[S](=O)=O)C(F)(F)(C)(F)(F)(C)(F)(F)                                                                      | -6.71 | 31.03 | 2.24 | P | OUT |
| QL01707 | 3,3,4,4,5,5,6,6,7,7,8,8,8-Tridecafluoro-N-(2-hydroxyethyl)-N-methyl-                                                   | 51619-73-9   | CN(CCO)[S](=O)=O)CCC(F)(F)(C)(F)(F)(C)(F)(F)(C)(F)(F)(F)                                                        | -7.85 | 31.71 | 2.75 | P | OUT |
| QL01708 | 2-[(Heptadecafluorooctyl)((methyl)amino)ethyl prop-2-enoate                                                            | 93491-54-4   | CN(CCO)C(=O)C=C(F)(F)(C)(F)(C)(F)(F)(F)(F)(F)(C)(F)(F)(F)(F)                                                    | -8.69 | 38.64 | 2.95 | P | OUT |
| QL01709 | 2-Propenoic acid, 2-[methyl[(undecafluoropentyl)sulfonyl]amino]ethyl ester                                             | 67584-56-9   | CN(CCO)C(=O)C=C[S](=O)=O)C(F)(F)(C)(F)(F)(C)(F)(F)(C)(F)(F)                                                     | -7.72 | 28.95 | 2.76 | P | OUT |
| QL01710 | 2-Propenoic acid, 2-[methyl[(nonafluorobutyl)sulfonyl]amino]ethyl ester                                                | 67584-55-8   | CN(CCO)C(=O)C=C[S](=O)=O)C(F)(F)(F)(F)(F)(C)(F)(F)(F)(F)(F)CCOP(O)(=O)OCCN[C](S)=O(=O)C(F)(F)(C)(F)(F)(C)(F)(F) | -7.42 | 25.71 | 2.71 | P | OUT |
| QL01711 | Bis[N-methyl(perfluorobutyl)sulfonamidoethyl]phosphoric acid                                                           | 120945-47-3  | F)C(F)(F)(C)(F)(F)F                                                                                             | -8.92 | 30.00 | 3.28 | P | OUT |
| QL01712 | 2-[Methyl[(nonafluorobutyl)sulfonyl]amino]ethyl phosphate                                                              | 147545-41-3  | CN(CCO)P(O)(O)=O)S(=O)=O)C(F)(F)(C)(F)(F)(C)(F)(F)(F)                                                           | -7.05 | 26.47 | 2.52 | P | OUT |
| QL01713 | 2,2,3,3,4,4,4-Heptafluoro-N-hydroxy-N-methylbutanamide                                                                 | 193008-44-5  | CN(O)C(=O)C(F)(F)(C)(F)(C)(F)(F)(C)(F)F                                                                         | -6.13 | 36.84 | 1.83 | P | IN  |
| QL01714 | N,N-Dimethyl perfluorooctane sulfonamide                                                                               | 213181-78-3  | CN(S(=O)(=O)C(F)(F)(F)(F)(F)(C)(F)(F)(C)(F)(F)(C)(F)(F)=O)C                                                     | -8.16 | 45.95 | 2.51 | P | IN  |
| QL01715 | 1,1,2,2,3,3,4,4,4-Nonafluoro-N-methyl-N-(trimethylstannyl)butane-1-sulfonamide                                         | 41006-33-1   | CN(S(=O)C(F)(F)(C)(F)(F)(F)(F)(F)(F)Sn(C)(C)C                                                                   | -6.32 | 27.27 | 2.17 | P | OUT |
| QL01716 | Heptadecafluoro-N-methylisooctanesulphonamide                                                                          | 93894-71-4   | CN[S](=O)=O)C(F)(F)(C)(F)(F)(C)(F)(F)(C)(F)(F)(C)(F)(F)(C)(F)(F)                                                | -8.22 | 50.00 | 2.43 | P | IN  |
| QL01717 | 1-Heptanesulfonamide, 1,1,2,2,3,3,4,4,5,5,6,6,7,7-pentadecafluoro-N-methyl-                                            | 68259-14-3   | CN[S](=O)=O)C(F)(F)(C)(F)(F)(C)(F)(F)(C)(F)(F)(C)(F)(F)(F)                                                      | -8.14 | 48.39 | 2.44 | P | IN  |
| QL01718 | 1-Hexanesulfonamide, 1,1,2,2,3,3,4,4,5,5,6,6-tridecafluoro-N-methyl-                                                   | 68259-15-4   | CN[S](=O)=O)C(F)(F)(C)(F)(F)(C)(F)(F)(C)(F)(F)(C)(F)(F)                                                         | -7.56 | 46.43 | 2.23 | P | IN  |
| QL01719 | 1-Pentanesulfonamide, 1,1,2,2,3,3,4,4,5,5,5-undecafluoro-N-methyl-                                                     | 68298-13-5   | CN[S](=O)=O)C(F)(F)(C)(F)(F)(C)(F)(F)(C)(F)(F)                                                                  | -7.26 | 44.00 | 2.15 | P | IN  |
| QL01720 | 1-Butanesulfonamide, 1,1,2,2,3,3,4,4,4-nonafluoro-N-methyl-                                                            | 68298-12-4   | CN[S](=O)=O)C(F)(F)(C)(F)(F)(C)(F)(F)                                                                           | -6.50 | 40.91 | 1.89 | P | IN  |
| QL01721 | 1-Methyl-2-(nonafluorobutyl)-1H-indole                                                                                 | 1608112-35-1 | Cn1cc(ccccc12)C(F)(F)(C)(F)(F)(C)(F)(F)                                                                         | -6.60 | 29.03 | 2.25 | P | OUT |
| QL01722 | 3,3,4,4,5,5-Heptafluoro-1-(3-methyl-1,3-benzothiazol-2(3H)-ylidene)pentan-2-one                                        | 41131-07-1   | CN1C(Sc2ccccc12)=CC(=O)C(F)(F)(C)(F)(F)F                                                                        | -6.57 | 22.58 | 2.40 | P | OUT |
| QL01723 | 1H-Pyrrole, 1-methyl-2-(tridecafluoroethyl)-                                                                           | 64435-67-2   | CN1C=CC=C1C(F)(F)(F)(C)(F)(F)(C)(F)(F)(C)(F)(F)                                                                 | -7.32 | 41.94 | 2.24 | P | IN  |
| QL01724 | 1-(1-Methyl-1H-indol-3-yl)thiolan-1-ium nonafluorobutane-1-sulfonate                                                   | 867373-18-0  | Cn1cc([S+](2CCCC2)C2ccccc12.[O-].[S](=O)=O)C(F)(F)(C)(F)(F)(C)(F)(F)                                            | -5.48 | 18.75 | 2.01 | P | OUT |
| QL01725 | 2,2,3,3,4,4,5,5,6,6,7,7,7-Tridecafluoro-1-(4-methylpiperazin-1-yl)heptan-1-one                                         | 560092-29-7  | CN1CCN(CC1)C(=O)C(F)(F)(C)(F)(F)(C)(F)(F)(C)(F)(F)                                                              | -7.85 | 33.33 | 2.71 | P | OUT |
| QL01726 | 2,2,3,3,4,4,4-Heptafluoro-1-(4-methylpiperazin-1-yl)butan-1-one                                                        | 499975-92-7  | CN1CCN(CC1)C(=O)C(F)(F)(C)(F)(F)                                                                                | -6.31 | 23.33 | 2.27 | P | OUT |
| QL01727 | Heptadecafluorononanoic acid--N-methylmethanamine (1/1)                                                                | 77032-24-7   | CNC.OC(=O)C(F)(F)(F)(F)(F)(C)(F)(F)(C)(F)(F)(C)(F)(F)(F)                                                        | -8.55 | 43.59 | 2.76 | P | IN  |
| QL01728 | 2,3,3,3-Tetrafluoro-2-[[1,1,2,3,3,3-hexafluoro-2-(heptafluoropropoxy)propoxy]propanoic acid--N-methylmethanamine (1/1) | 328065-54-9  | CNC.OC(=O)C(F)(OC(F)(F)(C)(F)(OC(F)(F)(C)(F)(F)(C)(F)(F)(C)(F)(F)                                               | -8.32 | 41.46 | 2.71 | P | IN  |
| QL01729 | 2,2,3,3,4,4,5,5,6,6,7,7,8,8,9,9,9-Heptadecafluoro-N-methylnonanamide                                                   | 314053-71-9  | CNC(=O)C(F)(F)(F)(F)(F)(C)(F)(F)(C)(F)(F)(C)(F)(F)(F)                                                           | -8.47 | 51.52 | 2.51 | P | IN  |
| QL01730 | N-Methylperfluorohexanamide                                                                                            | 89932-74-1   | CNC(=O)C(F)(F)(F)(F)(F)(C)(F)(F)(C)(F)(F)                                                                       | -7.68 | 48.15 | 2.24 | P | IN  |
| QL01731 | 2,2,3,3,4,4,5,5-Nonafluoro-N-methylpentanamide                                                                         | 115585-00-7  | CNC(=O)C(F)(F)(F)(F)(F)(C)(F)(F)                                                                                | -6.65 | 42.86 | 1.90 | P | IN  |
| QL01732 | 2,2,3,3,4,4,4-Heptafluoro-N-methylbutanamide                                                                           | 4314-42-5    | CNC(=O)C(F)(F)(F)(F)(F)                                                                                         | -6.27 | 38.89 | 1.84 | P | IN  |
| QL01733 | 3,3,4,4,5,5,6,6-Nonafluoro-2-hydroxy-N,N''-dimethylnorleucinamide                                                      | 107070-94-0  | CNC(=O)C(O)(NC(C)(F)(F)(C)(F)(F)(C)(F)(F)                                                                       | -6.45 | 30.00 | 2.15 | P | OUT |
| QL01734 | 4-(Heptadecafluorooctyl)-N-methylbenzamide                                                                             | 89932-69-4   | CNC(=O)C1=CC=C(C=C1)C(F)(F)(F)(F)(F)(F)(F)(F)(F)(F)(F)(F)(F)(F)(F)                                              | -8.74 | 39.53 | 2.95 | P | IN  |
| QL01735 | N-Methyl-4-(nonafluorobutyl)aniline                                                                                    | 1426840-85-8 | CNc1ccc(cc1)C(F)(F)(F)(F)(C)(F)(F)                                                                              | -7.20 | 31.03 | 2.47 | P | OUT |
| QL01736 | 5-(Heptafluoropropyl)-N,1-dimethyl-1H-1,2,4-triazol-3-amine                                                            | 714975-28-7  | CNc1nc(n(C)n1)C(F)(F)(F)(F)(F)                                                                                  | -6.34 | 28.00 | 2.16 | P | OUT |
| QL01737 | 5-(Heptafluoropropyl)-N-methyl-1,3,4-oxadiazol-2-amine                                                                 | 714975-29-8  | CNc1nnc(o1)C(F)(F)(F)(F)(F)                                                                                     | -6.71 | 33.33 | 2.18 | P | IN  |
| QL01738 | 2,2,3,3,4,4,4-Heptafluoro-N-methylbutan-1-amine                                                                        | 755-42-0     | CNCC(F)(F)(F)(F)(C)(F)(F)                                                                                       | -6.19 | 36.84 | 1.85 | P | IN  |
| QL01739 | methyl-(7,7,8,8,9,9,10,10,10-nonafluorodecyl)amine                                                                     | 228569-98-0  | CNCCCCC(F)(F)(C)(F)(F)(F)(C)(F)(F)                                                                              | -7.27 | 24.32 | 2.68 | P | OUT |
| QL01740 | N-Methyl-4-[3,4,4,4-tetrafluoro-3-(trifluoromethyl)butane-1-sulfonyl]butan-1-amine                                     | 1353009-38-7 | CNCCCCS(=O)=O)CCC(F)(C)(F)(F)(C)(F)(F)                                                                          | -6.37 | 18.92 | 2.41 | P | OUT |

|         |                                                                                                                                                      |              |                                                                                                                     |        |       |      |   |     |
|---------|------------------------------------------------------------------------------------------------------------------------------------------------------|--------------|---------------------------------------------------------------------------------------------------------------------|--------|-------|------|---|-----|
| QL01741 | Silane, trimethoxy(3,3,4,4,5,5,6,6-nonafluorohexyl)-<br>(3,3,4,4,5,5,6,6,7,7,8,8,9,9,10,10,11,11,12,12,12-<br>Henicosafluorododecyl)trimethoxysilane |              | CO[S](CCCC(C)(C)(F)(F)(F)(F)(F)(F)(OC)OC                                                                            | -6.37  | 25.71 | 2.23 | P | OUT |
| QL01742 |                                                                                                                                                      | 123445-18-1  | CO[S](CCCC(F)(C)(F)(F)(C)(F)(C)(F)(F)(C)(F)(F)(C)(F)(F)(C)(F)(F)(OC)OC                                              | -8.71  | 39.62 | 2.93 | P | IN  |
| QL01743 | 1H,1H,2H,2H-Perfluoroedecyltrimethoxysilane                                                                                                          | 83048-65-1   | CO[S](CCCC(F)(C)(F)(F)(C)(F)(C)(F)(C)(F)(C)(F)(F)(C)(F)(F)(C)(F)(F)(OC)OC                                           | -8.08  | 36.17 | 2.73 | P | OUT |
| QL01744 | 1,6-bis(trimethoxysilyl)perfluorohexane                                                                                                              | 94403-04-0   | CO[S](CCC(F)(F)(C)(F)(C)(F)(F)(C)(F)(F)(C)(F)(F)(C)[S](OC)[OC]OC)[OC]OC                                             | -7.36  | 19.35 | 2.85 | P | OUT |
| QL01745 | (3,3,4,4,5,5,5-Heptafluoropentyl)trimethoxysilane                                                                                                    | 109134-39-6  | CO[S](CCC(F)(F)(C)(F)(C)(F)(F))OC                                                                                   | -5.84  | 21.88 | 2.09 | P | OUT |
| QL01746 | 3,3,4,4,5,5,6,6,7,7,8,8,8-Tridecafluorooctyl [3-(<br>trimethoxysilyl)propyl]carbamate                                                                | 1421688-36-9 | CO[S](CCCN(C=O)OCCC(F)(C)(F)(F)(C)(F)(F)(C)(F)(F)(C)(F)(F)(OC)OC                                                    | -8.11  | 23.64 | 3.08 | P | OUT |
| QL01747 | 3-(Heptafluoroisopropoxy)propyltrimethoxysilane                                                                                                      | 19116-61-1   | CO[S](CCCOC(F)(C)(F)(F)(C)(F)(F))(OC)OC                                                                             | -5.52  | 19.44 | 2.01 | P | OUT |
| QL01748 | [3-(Heptafluoropropoxy)propyl]trimethoxysilane                                                                                                       | 903890-42-6  | CO[S](CCCO(C)(F)(C)(F)(F)(F)(F)(OC)OC                                                                               | -6.25  | 19.44 | 2.34 | P | OUT |
| QL01749 | Methyl 4,4,5,5,6,6-heptafluoro-2-methylidenehexanoate                                                                                                | 88021-90-3   | COC(=O)C=C(C)(F)(F)(C)(F)(F)                                                                                        | -6.36  | 29.17 | 2.13 | P | OUT |
| QL01750 | Methyl 3,3,4,4,5,5,6,6-nonafluoro-2-oxohexanoate                                                                                                     | 74067-16-6   | COC(=O)C(=O)(C)(F)(C)(F)(C)(F)(C)(F)F                                                                               | -7.15  | 40.91 | 2.18 | P | IN  |
| QL01751 | Methyl 5-cyano-α-(perfluoropropyl)ethylsulfinyl-α,β-dimethyl-3-thiophenepropanoate                                                                   | 1137678-56-8 | COC(=O)C(C)(C)(C)=CSC(=C1)C#N)S(=O)CCCC(F)(C)(F)(C)(F)(F                                                            | -6.94  | 15.56 | 2.76 | P | OUT |
| QL01752 | Methyl 4,4,5,5,6,6-heptafluoro-2-methylhex-2-enoate                                                                                                  | 88021-94-7   | COC(=O)C(C)=CC(F)(F)(C)(F)(F)                                                                                       | -6.36  | 29.17 | 2.13 | P | OUT |
| QL01753 | Hexanoic acid, 4,4,5,5,6,6,6-heptafluoro-2-methyl-, methyl ester                                                                                     | 88021-93-6   | COC(=O)C(C)(C)(F)(F)(C)(F)(F)F                                                                                      | -6.23  | 26.92 | 2.13 | P | OUT |
| QL01754 | Methyl 2-(heptafluoropropyl)-2-(trifluoromethyl)pent-4-en-1-                                                                                         | 83846-71-3   | COC(=O)C(CC=C(C)(F)(F)(C)(F)(F)(C)(F)(C)(F)F                                                                        | -5.95  | 33.33 | 1.84 | P | IN  |
| QL01755 | Methyl 2-chloro-3,3,4,4,5,5,6,6-nonafluorohexanoate                                                                                                  | 116356-70-8  | COC(=O)C(C)(C)(F)(F)(F)(F)(C)(F)(F)F                                                                                | -7.29  | 43.48 | 2.18 | P | IN  |
| QL01756 | Methyl tetrafluoro-2-(trifluoromethyl)propionate                                                                                                     | 680-05-7     | COC(=O)C(F)(C)(F)(C)(F)F                                                                                            | -5.51  | 41.18 | 1.43 | P | IN  |
| QL01757 | Methyl perfluorooctadecanoate                                                                                                                        | 16753-33-6   | COC(=O)C(F)(C)(F)(C)(F)(C)(F)(C)(F)(C)(F)(C)(F)(C)(F)(C)(F)(C)(F)(C)(F)(C)(F)(F)<br>(F)(C)(F)(C)(F)(F)(C)(F)(C)(F)F | -10.82 | 59.32 | 3.38 | P | OUT |
| QL01758 | Methyl perfluorohexadecanoate                                                                                                                        | 165457-57-8  | COC(=O)C(F)(C)(F)(C)(F)(C)(F)(C)(F)(C)(F)(C)(F)(C)(F)(C)(F)(C)(F)(C)(F)(C)(F)<br>(F)(C)(F)(C)(F)(F)F                | -10.46 | 58.49 | 3.23 | P | OUT |
| QL01759 | Methyl perfluoropentadecanoate                                                                                                                       | 203303-00-8  | COC(=O)C(F)(C)(F)(C)(F)(C)(F)(C)(F)(C)(F)(C)(F)(C)(F)(C)(F)(C)(F)(C)(F)(C)(F)<br>(F)(C)(F)(C)(F)F                   | -10.17 | 58.00 | 3.11 | P | OUT |
| QL01760 | Methyl perfluorotetradecanoate                                                                                                                       | 203302-99-2  | COC(=O)C(F)(C)(F)(C)(F)(C)(F)(C)(F)(C)(F)(C)(F)(C)(F)(C)(F)(C)(F)(C)(F)(C)(F)<br>(F)(C)(F)F                         | -10.04 | 57.45 | 3.07 | P | OUT |
| QL01761 | Methyl pentacosafuorotridecanoate                                                                                                                    | 185230-63-1  | COC(=O)C(F)(C)(F)(C)(F)(C)(F)(C)(F)(C)(F)(C)(F)(C)(F)(C)(F)(C)(F)(C)(F)(C)(F)<br>(F)F                               | -9.72  | 56.82 | 2.94 | P | OUT |
| QL01762 | Methyl Perfluorododecanoate                                                                                                                          | 56554-52-0   | COC(=O)C(F)(C)(F)(C)(F)(C)(F)(C)(F)(C)(F)(C)(F)(C)(F)(C)(F)(C)(F)(C)(F)(C)(F)<br>(F)F                               | -9.57  | 56.10 | 2.89 | P | OUT |
| QL01763 | Methyl perfluoroundecanoate                                                                                                                          | 203302-98-1  | COC(=O)C(F)(C)(F)(C)(F)(C)(F)(C)(F)(C)(F)(C)(F)(C)(F)(C)(F)(C)(F)(C)(F)(C)(F)<br>(F)F                               | -9.19  | 55.26 | 2.74 | P | IN  |
| QL01764 | Methyl Perfluorodecanoate                                                                                                                            | 307-79-9     | COC(=O)C(F)(C)(F)(C)(F)(C)(F)(C)(F)(C)(F)(C)(F)(C)(F)(C)(F)(C)(F)(C)(F)(C)(F)<br>(F)F                               | -9.01  | 54.29 | 2.68 | P | IN  |
| QL01765 | Methyl Perfluorononanoate                                                                                                                            | 51502-45-5   | COC(=O)C(F)(C)(F)(C)(F)(C)(F)(C)(F)(C)(F)(C)(F)(C)(F)(C)(F)(C)(F)(C)(F)(C)(F)<br>(F)F                               | -8.56  | 53.13 | 2.51 | P | IN  |
| QL01766 | Methyl perfluorooctanoate                                                                                                                            | 376-27-2     | COC(=O)C(F)(C)(F)(C)(F)(C)(F)(C)(F)(C)(F)(C)(F)(C)(F)(C)(F)(C)(F)(C)(F)(C)(F)<br>(F)F                               | -8.34  | 51.72 | 2.45 | P | IN  |
| QL01767 | Methyl perfluoroheptanoate                                                                                                                           | 14312-89-1   | COC(=O)C(F)(C)(F)(C)(F)(C)(F)(C)(F)(C)(F)(C)(F)(C)(F)(C)(F)(C)(F)(C)(F)(C)(F)<br>(F)F                               | -7.78  | 50.00 | 2.24 | P | IN  |
| QL01768 | Methyl perfluorohexanoate                                                                                                                            | 424-18-0     | COC(=O)C(F)(C)(F)(C)(F)(C)(F)(C)(F)(C)(F)(C)(F)(C)(F)(C)(F)(C)(F)(C)(F)(C)(F)<br>(F)F                               | -7.51  | 47.83 | 2.17 | P | IN  |
| QL01769 | Methyl nonafluorovalerate                                                                                                                            | 13038-26-1   | COC(=O)C(F)(C)(F)(C)(F)(C)(F)(C)(F)F                                                                                | -6.77  | 45.00 | 1.90 | P | IN  |







[illegible]







[illegible]





|         |                                                                                                     |             |                                                                                              |       |       |      |   |     |
|---------|-----------------------------------------------------------------------------------------------------|-------------|----------------------------------------------------------------------------------------------|-------|-------|------|---|-----|
| QL02182 | Perfluoro-2,2,5,5-tetramethylhexane                                                                 | 71076-47-6  | FC(F)(F)C(C(F)(F)F)C(F)(F)C(F)(F)C(F)(F)C(F)(F)C(F)(F)C(F)(F)F                               | -7.53 | 68.75 | 1.62 | P | OUT |
| QL02183 | 2,2-bis(trifluoromethyl)perfluoropropane                                                            | 374-51-6    | FC(F)(F)C(C(F)(F)F)C(F)(F)C(F)(F)C(F)(F)F                                                    | -6.46 | 70.59 | 1.09 | P | OUT |
| QL02184 | Perfluoro tert-butylcyclohexane                                                                     | 84808-64-0  | FC(F)(F)C(C(F)(F)F)C(F)(F)C1(F)C(F)(F)C(F)(F)C(F)(F)C1(F)F                                   | -7.97 | 66.67 | 1.88 | P | OUT |
| QL02185 | Perfluorodecahydro-1-t-butyl-naphthalene                                                            | 118914-94-6 | FC(F)(F)C(C(F)(F)F)C(F)(F)C1(F)C(F)(F)C(F)(F)C2(F)C(F)(F)C(F)(F)C(F)(F)C(F)(F)C12F           | -8.15 | 65.00 | 2.01 | P | IN  |
| QL02186 | Perfluorodecahydro-2-t-butyl-naphthalene                                                            | 119107-97-0 | FC(F)(F)C(C(F)(F)F)C(F)(F)C1(F)C(F)(F)C(F)(F)C2(F)C(F)(F)C(F)(F)C(F)(F)C2(F)C1(F)F           | -8.63 | 65.00 | 2.23 | P | IN  |
| QL02187 | 2H-Perfluoro(2-methylpentane)                                                                       | 30320-28-6  | FC(F)(F)C(C(F)(F)F)C(F)(F)C(F)(F)C(F)(F)F                                                    | -7.51 | 65.00 | 1.71 | P | OUT |
| QL02188 | (1,1,1,5,5,6,6,7,7,7-Decafluorohept-3-yn-2-ylidene)cyclopentane                                     | 139226-05-4 | FC(F)(F)C(C#CC(F)(F)C(F)(F)C(F)(F)F)=C1CCCC1                                                 | -6.59 | 33.33 | 2.13 | P | IN  |
| QL02189 | Hexafluoro-2,2,3,3-tetrachlorobutane                                                                | 375-34-8    | FC(F)(F)C(Cl)(Cl)C(Cl)(Cl)C(F)(F)F                                                           | -7.30 | 71.43 | 1.45 | P | OUT |
| QL02190 | 1,2-Dibromohexafluoropropane                                                                        | 661-95-0    | FC(F)(F)C(F)(Br)C(F)(F)Br                                                                    | -7.10 | 72.73 | 1.32 | P | OUT |
| QL02191 | Bis(perfluoroisopropyl)ketone                                                                       | 813-44-5    | FC(F)(F)C(F)(C(=O)C(F)(F)C(F)(F)C(F)(F)F)                                                    | -7.14 | 63.64 | 1.58 | P | OUT |
| QL02192 | 1,1,1,2,4,4,5,5-Octafluoro-5-iodo-2-(trifluoromethyl)pentan-3-one                                   | 93822-96-9  | FC(F)(F)C(F)(C(=O)C(F)(F)C(F)(F)C(F)(F)F)                                                    | -7.33 | 63.16 | 1.68 | P | OUT |
| QL02193 | 1-Propanone, 2,3,3,3-tetrafluoro-1-phenyl-2-(trifluoromethyl)-                                      | 56112-35-7  | FC(F)(F)C(F)(C(=O)C1=CC=CC=C1C(F)(F)F)                                                       | -5.87 | 30.43 | 1.88 | P | OUT |
| QL02194 | 1-(4-Chlorophenyl)-2,3,3,3-tetrafluoro-2-(trifluoromethyl)propan-1-one                              | 56041-73-7  | FC(F)(F)C(F)(C(=O)c1ccc(Cl)cc1)C(F)(F)F                                                      | -6.65 | 34.78 | 2.12 | P | IN  |
| QL02195 | Benzyl 2,3,3,3-tetrafluoro-2-(trifluoromethyl)propanoate                                            | 38392-11-9  | FC(F)(F)C(F)(C(=O)OCc1ccccc1)C(F)(F)F                                                        | -6.22 | 25.93 | 2.16 | P | OUT |
| QL02196 | Bis[2,3,3,3-tetrafluoro-1-oxo-2-(trifluoromethyl)propyl] peroxide                                   | 111632-55-4 | FC(F)(F)C(F)(C(=O)OOC(=O)C(F)(F)C(F)(F)C(F)(F)C(F)(F)F)                                      | -7.46 | 53.85 | 1.99 | P | IN  |
| QL02197 | 2-bromo-3,4,4,4-tetrafluoro-3-(trifluoromethyl)but-1-ene                                            | 234443-24-4 | FC(F)(F)C(F)(C(Br)=C(C(F)(F)F)F)                                                             | -5.79 | 53.33 | 1.24 | P | IN  |
| QL02198 | Perfluoro-2,3-dimethylbutane                                                                        | 354-96-1    | FC(F)(F)C(F)(C(F)(F)F)C(F)(F)C(F)(F)F                                                        | -6.88 | 70.00 | 1.30 | P | OUT |
| QL02199 | Heptane, 1,1,1,2,3,3,4,5,5,6,6,7,7,7-tridecafluoro-2,4,6-tris(trifluoromethyl)-                     | 84808-63-9  | FC(F)(F)C(F)(C(F)(F)C(F)(F)C(F)(F)C(F)(F)C(F)(F)C(F)(F)C(F)(F)F)                             | -8.42 | 68.75 | 2.03 | P | OUT |
| QL02200 | Perfluoro-2,7-dimethyloctane                                                                        | 3021-63-4   | FC(F)(F)C(F)(C(F)(F)C(F)(F)C(F)(F)C(F)(F)C(F)(F)C(F)(F)F)                                    | -8.66 | 68.75 | 2.14 | P | OUT |
| QL02201 | Perfluoro-2,9-dimethyldecane                                                                        | 103188-55-2 | FC(F)(F)C(F)(C(F)(F)C(F)(F)C(F)(F)C(F)(F)C(F)(F)C(F)(F)C(F)(F)F)                             | -9.28 | 68.42 | 2.43 | P | OUT |
| QL02202 | 1,1,1,2,3,3,4,4,5,5,6,6,7,7,8,8,9,9,10,10,11,12,12-tetracosafuoro-2,11-bis(trifluoromethyl)dodecane | 118694-32-9 | FC(F)(F)C(F)(C(F)(F)C(F)(F)C(F)(F)C(F)(F)C(F)(F)C(F)(F)C(F)(F)C(F)(F)C(F)(F)C(F)(F)C(F)(F)F) | -9.80 | 68.18 | 2.67 | P | OUT |
| QL02203 | 1,1,1,2,3,3,4,4,5,5,6,6,7,7,8,8,9,9,10,10-icosafuoro-12-iodo-2-(trifluoromethyl)dodecane            | 242142-80-9 | FC(F)(F)C(F)(C(F)(F)C(F)(F)C(F)(F)C(F)(F)C(F)(F)C(F)(F)C(F)(F)C(F)(F)C(F)(F)C(F)(F)CCI)      | -9.36 | 58.54 | 2.73 | P | OUT |
| QL02204 | 2-(Perfluoro-7-methyloctyl)ethyl iodide                                                             | 40678-31-7  | FC(F)(F)C(F)(C(F)(F)C(F)(F)C(F)(F)C(F)(F)C(F)(F)C(F)(F)C(F)(F)C(F)(F)CCI)                    | -8.77 | 57.14 | 2.50 | P | IN  |
| QL02205 | 2-[2,2,3,3,4,4,5,5,6,6,7,7-dodecafluoro-6-(trifluoromethyl)heptyl]oxirane                           | 24564-77-0  | FC(F)(F)C(F)(C(F)(F)C(F)(F)C(F)(F)C(F)(F)C(F)(F)C1CO1)                                       | -7.61 | 48.39 | 2.20 | P | IN  |
| QL02206 | 1,1,1,2,3,3,4,4,5,5,6,6-dodecafluoro-8-iodo-2-(trifluoromethyl)octane                               | 18017-20-4  | FC(F)(F)C(F)(C(F)(F)C(F)(F)C(F)(F)C(F)(F)C(F)(F)CCI)                                         | -8.04 | 55.17 | 2.22 | P | IN  |
| QL02207 | 3,3,4,4,5,5,6,6,7,8,8-Dodecafluoro-7-(trifluoromethyl)octyl prop-2-enoate                           | 50836-65-2  | FC(F)(F)C(F)(C(F)(F)C(F)(F)C(F)(F)C(F)(F)C(F)(F)CCOC(=O)C=C                                  | -8.27 | 41.67 | 2.68 | P | IN  |
| QL02208 | Perfluoroisooheptyl Iodide                                                                          | 3486-08-6   | FC(F)(F)C(F)(C(F)(F)C(F)(F)C(F)(F)C(F)(F)C(F)(F)I)                                           | -8.07 | 69.57 | 1.85 | P | OUT |
| QL02209 | 3,3,4,4,5,5,6,6-Octafluoro-5-(trifluoromethyl)hex-1-ene                                             | 139060-76-7 | FC(F)(F)C(F)(C(F)(F)C(F)(F)C(F)(F)C(F)(F)C=C                                                 | -6.91 | 52.38 | 1.77 | P | IN  |
| QL02210 | 3-(Perfluoro-3-methylbutyl)-1,2-propenoxide                                                         | 54009-81-3  | FC(F)(F)C(F)(C(F                                                                             |       |       |      |   |     |

[illegible]

|         |                                                                                                                                                     |                             |                                                                                                                                        |                |                |              |   |     |
|---------|-----------------------------------------------------------------------------------------------------------------------------------------------------|-----------------------------|----------------------------------------------------------------------------------------------------------------------------------------|----------------|----------------|--------------|---|-----|
| QLO2292 | 1-(3,5-Dibromophenyl)-2,2,3,4,4,4-heptafluorobutan-1-one                                                                                            | 79851-20-0                  | FC(F)C(F)C(F)C(F)C(=O)C1=CC(Br)=CC(Br)=C1                                                                                              | -6.96          | 39.13          | 2.15         | P | IN  |
| QLO2293 | 2,2,3,3,4,4,4-heptafluoro-1-phenylbutan-1-one                                                                                                       | 559-91-1                    | FC(F)C(F)C(F)C(F)C(=O)C1=CC=CC=C1                                                                                                      | -6.51          | 30.43          | 2.17         | P | OUT |
| QLO2294 | 2-(2,2,3,3,4,4,4-Heptafluorobutanoyl)cyclopentan-1-one                                                                                              | 141478-83-3                 | FC(F)C(F)C(F)C(F)C(=O)O1CCCCC1=O                                                                                                       | -5.79          | 28.00          | 1.91         | P | OUT |
| QLO2295 | 2-(2,2,3,3,4,4,4-Heptafluorobutanoyl)cyclohexan-1-one                                                                                               | 37172-87-5                  | FC(F)C(F)C(F)C(F)C(=O)O1CCCCC1=O                                                                                                       | -6.15          | 25.00          | 2.15         | P | OUT |
| QLO2296 | 5H,5H-Perfluoro-4,6-nonanedione<br>4,4''-Bis(perfluoropropyl)-1,3-dioxopropyl-o-terphenyl-4'-sulfonyl chloride                                      | 113116-18-0<br>200862-70-0  | FC(F)C(F)C(F)C(F)C(=O)CC(=O)C1=CC=C(C=C1)C1=C(C=C(C=C1))S(Cl)(=O)=O)C1=CC=C(C=C1)C1=CC(=O)C(F)C(F)F                                    | -8.21          | 51.85          | 2.38         | P | IN  |
| QLO2297 | 4,4,5,5,6,6,6-Heptafluoro-1-phenylhexane-1,3-dione                                                                                                  | 53580-21-5                  | FC(F)C(F)C(F)C(F)C(=O)CC(=O)C1=CC=CC=C1                                                                                                | -8.92          | 22.39          | 3.48         | P | OUT |
| QLO2298 | 4,4,5,5,6,6,6-Heptafluoro-1-(furan-2-yl)hexane-1,3-dione                                                                                            | 595-26-6                    | FC(F)C(F)C(F)C(F)C(=O)CC(=O)C1=CC=CC=C1                                                                                                | -6.76          | 25.00          | 2.43         | P | OUT |
| QLO2299 | (Perfluorobutyryl)-2-thenoxymethane                                                                                                                 | 559-94-4                    | FC(F)C(F)C(F)C(F)C(=O)CC1=CC=CC=C1                                                                                                     | -6.53          | 28.00          | 2.24         | P | OUT |
| QLO2300 | 3,3,4,4,5,5,5-Heptafluoro-1-phenylpentan-2-one                                                                                                      | 559-96-6                    | FC(F)C(F)C(F)C(F)C(=O)CC1=CC=CC=C1                                                                                                     | -6.48          | 26.92          | 2.25         | P | OUT |
| QLO2302 | 3,3,4,4,5,5,5-Heptafluoro-1-pyridin-2-ylpentan-2-one                                                                                                | 336-60-7                    | FC(F)C(F)C(F)C(F)C(=O)CC1=CC=CC=N1                                                                                                     | -6.54          | 28.00          | 2.25         | P | OUT |
| QLO2303 | N,N-Dicyclohexyl-2,2,3,3,4,4,4-heptafluorobutanamide                                                                                                | 386-84-5                    | FC(F)C(F)C(F)C(F)C(=O)N1CCCCC1C1CCCCC1                                                                                                 | -5.69          | 14.89          | 2.21         | P | OUT |
| QLO2304 | N,N-Dichloro-2,2,3,3,4,4,4-heptafluorobutanamide                                                                                                    | 86451-48-1                  | FC(F)C(F)C(F)C(F)C(=O)N(Cl)Cl                                                                                                          | -7.46          | 60.00          | 1.83         | P | IN  |
| QLO2305 | 1-(Heptafluorobutanyl)imidazole                                                                                                                     | 32477-35-3                  | FC(F)C(F)C(F)C(F)C(=O)N1C=C-CN=1                                                                                                       | -6.23          | 35.00          | 1.92         | P | IN  |
| QLO2306 | N-Heptafluorobutylproline                                                                                                                           | 56236-41-0                  | FC(F)C(F)C(F)C(F)C(=O)N1CCCC[C@H]1C(=O)                                                                                                | -6.41          | 29.63          | 2.15         | P | OUT |
| QLO2307 | 1-(2,3-Dihydro-1H-indol-1-yl)-2,2,3,3,4,4,4-heptafluoro-1-butanone                                                                                  | 543708-46-9                 | FC(F)C(F)C(F)C(F)C(=O)N1CCC2=CC=CC=C12                                                                                                 | -6.31          | 24.14          | 2.24         | P | OUT |
| QLO2308 | 2,2,3,3,4,4,4-heptafluoro-1-pyrrolidin-1-ylbutan-1-one                                                                                              | 424-54-4                    | FC(F)C(F)C(F)C(F)C(=O)N1CCCC1                                                                                                          | -5.82          | 28.00          | 1.92         | P | OUT |
| QLO2309 | 2,2,3,3,4,4,4-Heptafluoro-1-(piperidin-1-yl)butan-1-one                                                                                             | 425-19-4                    | FC(F)C(F)C(F)C(F)C(=O)N1CCCCC1                                                                                                         | -6.20          | 25.00          | 2.17         | P | OUT |
| QLO2310 | 1,1'-(Piperazine-1,4-diyl)bis[heptafluorobutan-1-one]<br>1-[4-{[2H-1,3-Benzodioxol-5-yl)methyl]piperazin-1-yl}-2,2,3,3,4,4,4-heptafluorobutan-1-one | 120219-50-3<br>546063-97-2  | FC(F)C(F)C(F)C(F)C(=O)N1CCN(CC1)C(=O)C(F)C(F)C(F)C(F)F                                                                                 | -8.02          | 36.84          | 2.69         | P | IN  |
| QLO2311 | 2,2,3,3,4,4,4-Heptafluoro-1-(piperazin-1-yl)butan-1-one                                                                                             | 89245-13-6                  | FC(F)C(F)C(F)C(F)C(=O)N1CCNCC1                                                                                                         | -7.28          | 16.28          | 2.89         | P | OUT |
| QLO2312 | 2,2,3,3,4,4,4-Heptafluoro-1-(morpholin-4-yl)butan-1-one                                                                                             | 425-20-7                    | FC(F)C(F)C(F)C(F)C(=O)N1CCOCC1                                                                                                         | -6.25          | 25.93          | 2.17         | P | OUT |
| QLO2314 | N,N'-1,3-Phenylenabis(perfluorobutanamide)<br>Butanamide, N,N'-[1,1'-biphenyl]-4,4'-diylbis[2,2,3,3,4,4,4-heptafluoro-                              | 524726-48-5<br>75042-07-8   | FC(F)C(F)C(F)C(F)C(=O)NC1=CC(NC(=O)C(F)C(F)C(F)C(F)F)=CC=C1<br>FC(F)C(F)C(F)C(F)C(=O)NC1=CC=C(C=C1)C1=CC=C(NC(=O)C(F)C(F)C(F)C(F)F)=C1 | -6.31<br>-8.34 | 26.92<br>36.84 | 2.17<br>2.83 | P | OUT |
| QLO2315 |                                                                                                                                                     |                             | FC(F)C(F)C(F)C(F)C(=O)NC1=CC=C(C=C1)C1=CC=C(C=C1)C(=O)C(F)C(F)C(F)C(F)C(=O)C1                                                          | -8.65          | 29.17          | 3.18         | P | OUT |
| QLO2316 | N,N'-(Methylene-1,4-phenylene)bis(perfluorobutanamide)                                                                                              | 124232-75-3                 | FC(F)C(F)C(F)C(F)C(=O)NC1=CC=C(C=C1)C(=O)C(F)C(F)C(F)C(F)C(=O)C1                                                                       | -8.75          | 27.45          | 3.27         | P | OUT |
| QLO2317 | N,N'-1,4-Phenylenabis(perfluorobutanamide)                                                                                                          | 524726-49-6                 | FC(F)C(F)C(F)C(F)C(=O)NC1=CC=C(NC(=O)C(F)C(F)C(F)C(F)C(=O)C1                                                                           | -8.39          | 36.84          | 2.86         | P | OUT |
| QLO2318 | Al 3-18011                                                                                                                                          | 336-61-8                    | FC(F)C(F)C(F)C(F)C(=O)NC1=CC=C(C=C1)                                                                                                   | -6.54          | 28.00          | 2.25         | P | OUT |
| QLO2319 | Thiobenzyll-N-heptafluorobutylranthanilate                                                                                                          | 82422-25-1                  | FC(F)C(F)C(F)C(F)C(=O)NC1=CC=C(C=C1)C(=O)SCC1=CC=CC=C1                                                                                 | -7.31          | 17.07          | 2.89         | P | OUT |
| QLO2320 | N-2-Pyridinylperfluorobutanamide                                                                                                                    | 283172-09-8                 | FC(F)C(F)C(F)C(F)C(=O)NC1=CC=CC=N1                                                                                                     | -6.61          | 29.17          | 2.25         | P | OUT |
| QLO2321 | 2,2,3,3,4,4,4-Heptafluoro-N-(2-oxo-2,3-dihydropyrimidin-4-yl)butanamide                                                                             | 94720-20-4                  | FC(F)C(F)C(F)C(F)C(=O)NC1=CC=NC(=O)N1                                                                                                  | -6.60          | 29.17          | 2.24         | P | OUT |
| QLO2322 | (2-Naphthalenyl)perfluorobutanamide                                                                                                                 | 582-00-3                    | FC(F)C(F)C(F)C(F)C(=O)NC1=CC2=CC=CC=C2C=C1                                                                                             | -6.83          | 22.58          | 2.52         | P | OUT |
| QLO2323 | N-(2,6-Dichlorophenyl)-2,2,3,3,4,4,4-heptafluorobutanamide                                                                                          | 121806-69-7                 | FC(F)C(F)C(F)C(F)C(=O)Nc1c(Cl)cccc1Cl                                                                                                  | -6.90          | 36.00          | 2.20         | P | IN  |
| QLO2324 | 2,2,3,3,4,4,4-Heptafluoro-N-(2,4,5-trichlorophenyl)butanamide                                                                                       | 121806-70-0                 | FC(F)C(F)C(F)C(F)C(=O)Nc1cc(Cl)c(Cl)cc1Cl                                                                                              | -7.59          | 40.00          | 2.41         | P | IN  |
| QLO2325 | N-(2,5-Dichlorophenyl)-2,2,3,3,4,4,4-heptafluorobutanamide                                                                                          | 121806-67-5                 | FC(F)C(F)C(F)C(F)C(=O)Nc1cc(Cl)ccc1Cl                                                                                                  | -6.96          | 36.00          | 2.23         | P | IN  |
| QLO2326 | N-(4-Bromophenyl)-2,2,3,3,4,4,4-heptafluorobutanamide                                                                                               | 308-67-8                    | FC(F)C(F)C(F)C(F)C(=O)Nc1ccc(Br)cc1                                                                                                    | -7.19          | 32.00          | 2.44         | P | OUT |
| QLO2327 | N-(4-Chlorophenyl)-2,2,3,3,4,4,4-heptafluorobutanamide                                                                                              | 79497-98-6                  | FC(F)C(F)C(F)C(F)C(=O)Nc1ccc(Cl)cc1                                                                                                    | -7.19          | 32.00          | 2.44         | P | OUT |
| QLO2328 | N-(2,4-Dichlorophenyl)-2,2,3,3,4,4,4-heptafluorobutanamide                                                                                          | 121806-66-4                 | FC(F)C(F)C(F)C(F)C(=O)Nc1ccc(Cl)cc1Cl                                                                                                  | -7.37          | 36.00          | 2.42         | P | IN  |
| QLO2329 | N-(3-Chlorophenyl)-2,2,3,3,4,4,4-heptafluorobutanamide                                                                                              | 106376-36-7                 | FC(F)C(F)C(F)C(F)C(=O)Nc1cccc(Cl)c1                                                                                                    | -6.76          | 32.00          | 2.24         | P | OUT |
| QLO2330 | N-(2,3-Dichlorophenyl)-2,2,3,3,4,4,4-heptafluorobutanamide                                                                                          | 121806-68-6                 | FC(F)C(F)C(F)C(F)C(=O)Nc1cccc(Cl)c1Cl                                                                                                  | -6.96          | 36.00          | 2.23         | P | IN  |
| QLO2331 | N-(9,10-Dioxo-9,10-dihydroanthracen-1-yl)-2,2,3,3,4,4,4-heptafluorobutanamide                                                                       | 162441-56-7                 | FC(F)C(F)C(F)C(F)C(=O)Nc1cccc2C(=O)c3cccc3C(=O)c12                                                                                     | -6.94          | 18.92          | 2.67         | P | OUT |
| QLO2332 | N-Cyclohexyl-2,2,3,3,4,4,4-heptafluorobutanamide                                                                                                    | 56663-38-8                  | FC(F)C(F)C(F)C(F)C(=O)NC1CCCCC1                                                                                                        | -6.23          | 22.58          | 2.25         | P | OUT |
| QLO2333 | N-(2-Chlorophenyl)-2,2,3,3,4,4,4-heptafluorobutanamide                                                                                              | 121806-65-3                 | FC(F)C(F)C(F)C(F)C(=O)Nc1cccc(Cl)c1                                                                                                    | -6.73          | 32.00          | 2.23         | P | OUT |
| QLO2334 | 2,2,3,3,4,4,4-Heptafluoro-N-(2-iodophenyl)butanamide                                                                                                | 378215-44-2                 | FC(F)C(F)C(F)C(F)C(=O)Nc1cccc(Cl)c1                                                                                                    | -6.73          | 32.00          | 2.23         | P | OUT |
| QLO2335 | (1R-trans)-N,N'-1,2-Cyclohexanediylbis(perfluorobutanamide)                                                                                         | 133964-60-0                 | FC(F)C(F)C(F)C(F)C(=O)N1CCCCC1NC(=O)C(F)C(F)C(F)C(F)F                                                                                  | -7.82          | 31.82          | 2.73         | P | OUT |
| QLO2336 | 2,2,3,3,4,4,4-Heptafluoro-N-(1H-1,2,4-triazol-5-yl)butanamide                                                                                       | 70501-47-2                  | FC(F)C(F)C(F)C(F)C(=O)Nc1Nnnc1                                                                                                         | -6.68          | 33.33          | 2.17         | P | IN  |
| QLO2337 | Allylperfluorobutanamide                                                                                                                            | 24429-61-6                  | FC(F)C(F)C(F)C(F)C(=O)NCC=C                                                                                                            | -6.66          | 31.82          | 2.20         | P | OUT |
| QLO2338 | N-(Phenylmethyl)perfluorobutanamide                                                                                                                 | 560-02-1                    | FC(F)C(F)C(F)C(F)C(=O)NCc1=CC=CC=C1                                                                                                    | -6.75          | 25.00          | 2.42         | P | OUT |
| QLO2339 | 2,2,3,3,4,4,4-Heptafluoro-N-(2-phenylethyl)butanamide                                                                                               | 29723-29-3                  | FC(F)C(F)C(F)C(F)C(=O)NCCC1=CC=CC=C1                                                                                                   | -6.75          | 22.58          | 2.49         | P | OUT |
| QLO2340 | 2,2,3,3,4,4,4-Heptafluoro-N-(3-phenylpropyl)butanamide                                                                                              | 77970-73-1                  | FC(F)C(F)C(F)C(F)C(=O)NCCCC1CCCCC1                                                                                                     | -6.98          | 20.59          | 2.64         | P | OUT |
| QLO2341 | N,N'-bis(Perfluorobutanoyl)1,6-hexanediamine                                                                                                        | 123665-83-8                 | FC(F)C(F)C(F)C(F)C(=O)NCCCCCCCNC(=O)C(F)C(F)C(F)C(F)F                                                                                  | -8.29          | 30.43          | 2.98         | P | OUT |
| QLO2342 | N,N'-bis(Perfluorobutanoyl)1,5-pentanediamine                                                                                                       | 1814-80-8                   | FC(F)C(F)C(F)C(F)C(=O)NCCCCCNC(=O)C(F)C(F)C(F)C(F)F                                                                                    | -8.31          | 32.56          | 2.94         | P | OUT |
| QLO2343 | N,N'-bis(Perfluorobutanoyl)1,4-butanediamine                                                                                                        | 2967-59-1                   | FC(F)C(F)C(F)C(F)C(=O)NCCCCCNC(=O)C(F)C(F)C(F)C(F)F                                                                                    | -8.20          | 35.00          | 2.82         | P | OUT |
| QLO2344 | n-(2-chloroethyl)-2,2,3,3,4,4,4-heptafluorobutanamide                                                                                               | 4314-29-8                   | FC(F)C(F)C(F)C(F)C(=O)NCCCl                                                                                                            | -7.02          | 38.10          | 2.20         | P | IN  |
| QLO2345 | N,N'-bis(Perfluorobutanoyl)1,3-propanediamine                                                                                                       | 149981-59-9                 | FC(F)C(F)C(F)C(F)C(=O)NCCNCNC(=O)C(F)C(F)C(F)C(F)F                                                                                     | -8.25          | 37.84          | 2.77         | P | IN  |
| QLO2346 | ST50925188                                                                                                                                          | 86273-64-5                  | FC(F)C(F)C(F)C(F)C(=O)NCCNC(=O)C(F)C(F)C(F)C(F)F                                                                                       | -8.17          | 41.18          | 2.65         | P | IN  |
| QLO2347 | N-Benzylidene-2,2,3,3,4,4,4-heptafluorobutanehydrazide<br>2,2,3,3,4,4,4-Heptafluoro-N'-[pyridin-4-yl)methylidene]butanehydrazide                    | 736-62-9<br>109373-81-1     | FC(F)C(F)C(F)C(F)C(=O)NN=C1CCCC1                                                                                                       | -6.89<br>-6.95 | 25.00<br>25.93 | 2.49         | P | OUT |
| QLO2348 | 2,2,3,3,4,4,4-heptafluoro-n'-(2,2,3,3,4,4,4-heptafluorobutanoyl)butanehydrazide                                                                     | 648-19-1                    | FC(F)C(F)C(F)C(F)C(=O)NNC(=O)C(F)C(F)C(F)C(F)F                                                                                         | -8.25          | 50.00          | 2.45         | P | IN  |
| QLO2349 | 2,2,3,3,4,4,4-Heptafluoro-N'-phenylbutanehydrazide                                                                                                  | 77146-66-8                  | FC(F)C(F)C(F)C(F)C(=O)NNc1cccc1                                                                                                        | -6.80          | 25.93          | 2.42         | P | OUT |
| QLO2350 | 4-Chlorophenyl (2,2,3,3,4,4,4-heptafluorobutanoyl)sulfamate                                                                                         | 1443258-17-0                | FC(F)C(F)C(F)C(F)C(=O)NS(=O)(=O)Oc1cccc(Cl)cc1                                                                                         | -7.47          | 27.59          | 2.68         | P | OUT |
| QLO2352 | Heptafluorobutanoic anhydride<br>1,1,1,3,3,3-Hexafluoro-2-(trifluoromethyl)propan-2-yl heptafluorobutanoate                                         | NOCAS_861881<br>922168-38-5 | FC(F)C(F)C(F)C(F)C(=O)OC(=O)C(F)C(F)C(F)C(F)F                                                                                          | -8.45          | 56.00          | 2.38         | P | IN  |
| QLO2353 |                                                                                                                                                     |                             |                                                                                                                                        | -7.85          | 61.54          | 1.96         | P | IN  |
| QLO2354 | Vinyl perfluorobutyrate                                                                                                                             | 356-28-5                    | FC(F)C(F)C(F)C(F)C(=O)OC(C)=C                                                                                                          | -6.48          | 38.89          | 1.93         | P | IN  |

|         |                                                                                                                                                                 |              |                                                                               |       |       |      |   |     |
|---------|-----------------------------------------------------------------------------------------------------------------------------------------------------------------|--------------|-------------------------------------------------------------------------------|-------|-------|------|---|-----|
| QL02355 | Decane-1,10-diyl bis(heptafluorobutanoate)                                                                                                                      | 426-64-2     | FC(F)(F)C(F)(F)C(F)(F)C(F)(F)C(F)(F)C(F)(F)C(F)(F)F                           | -8.60 | 25.00 | 3.27 | P | OUT |
| QL02356 | bis(heptafluorobutyl)peroxide                                                                                                                                   | 336-64-1     | FC(F)(F)C(F)(F)C(F)(F)C(F)(F)C(F)(F)C(F)(F)C(F)(F)F                           | -8.48 | 53.85 | 2.45 | P | IN  |
| QL02357 | 2,2,3,3,4,4,4-Heptafluoro-1-(morpholin-4-yl)butane-1-thione                                                                                                     | 1206684-15-2 | FC(F)(F)C(F)(F)C(F)(F)C(F)(F)C(F)(F)C(F)(F)C(F)(F)F                           | -6.31 | 26.92 | 2.17 | P | OUT |
| QL02358 | 2,2,3,3,4,4,4-Heptafluoro-N-phenylbutanethioamide                                                                                                               | 61881-12-7   | FC(F)(F)C(F)(F)C(F)(F)C(F)(F)C(F)(F)C(F)(F)C(F)(F)F                           | -6.54 | 28.00 | 2.25 | P | OUT |
| QL02359 | 2-bromo-1,1,1,3,3,4,4,5,5,5-decafluoro-2-(trifluoromethyl)pentane                                                                                               | 22528-67-2   | FC(F)(F)C(F)(F)C(F)(F)C(F)(Br)(C(F)(F)C(F)(F)F                                | -7.81 | 70.00 | 1.72 | P | OUT |
| QL02360 | 2-bromo-3,3,4,4,5,5,5-heptafluoropent-1-ene                                                                                                                     | 96916-53-9   | FC(F)(F)C(F)(F)C(F)(F)C(F)(Br)C                                               | -6.28 | 53.33 | 1.46 | P | IN  |
| QL02361 | heptafluorobutanyl bromide                                                                                                                                      | 375-13-3     | FC(F)(F)C(F)(F)C(F)(F)C(F)(Br)O                                               | -6.75 | 61.54 | 1.46 | P | OUT |
| QL02362 | 4,5-Dibromo-1,1,1,2,2,3,3-heptafluoropentane                                                                                                                    | 377-46-8     | FC(F)(F)C(F)(F)C(F)(F)C(F)(Br)CBr                                             | -7.08 | 52.94 | 1.84 | P | IN  |
| QL02363 | 1,1,1,2,2,3,3,5,6,6,6-Undecafluoro-4,4,4-tris(trifluoromethyl)hexane                                                                                            | 86714-23-0   | FC(F)(F)C(F)(F)C(F)(F)C(F)(F)C(F)(F)C(F)(F)C(F)(F)F                           | -7.90 | 68.97 | 1.79 | P | OUT |
| QL02364 | 1,1,1,2,2,3,3,5,5,5-Decafluoro-4,4-bis(trifluoromethyl)pentane                                                                                                  | 29971-79-7   | FC(F)(F)C(F)(F)C(F)(F)C(F)(F)C(F)(F)C(F)(F)C(F)(F)F                           | -7.59 | 69.57 | 1.63 | P | OUT |
| QL02365 | 4,4,5,5,6,6,6-Heptafluoro-3,3-bis(trifluoromethyl)hex-1-ene                                                                                                     | 79272-26-7   | FC(F)(F)C(F)(F)C(F)(F)C(C=C)C(F)(F)C(F)(F)F                                   | -6.83 | 54.17 | 1.69 | P | IN  |
| QL02366 | 1-bromo-4,4,5,5,6,6,6-heptafluoro-3,3-bis(trifluoromethyl)hex-1-ene                                                                                             | 128454-94-4  | FC(F)(F)C(F)(F)C(F)(F)C(C=CBr)(C(F)(F)C(F)(F)F                                | -7.29 | 58.33 | 1.79 | P | IN  |
| QL02367 | 6,6,7,7,8,8,8-Heptafluoro-5,5-bis(trifluoromethyl)octa-1,3-diene                                                                                                | 1429188-77-1 | FC(F)(F)C(F)(F)C(F)(F)C(C=C)C(C(F)(F)C(F)(F)F                                 | -7.14 | 46.43 | 2.04 | P | IN  |
| QL02368 | 4,4,5,5,6,6,6-heptafluoro-1-iodo-3,3-bis(trifluoromethyl)hex-1-ene (Perfluoropropyl)-2-(2-phenylhydrazinylidene)ethanal phenylhydrazone                         | 126681-21-8  | FC(F)(F)C(F)(F)C(F)(F)C(C=CI)(C(F)(F)C(F)(F)F                                 | -7.29 | 58.33 | 1.79 | P | IN  |
| QL02369 | 2,2'-(2,2,3,3,4,4,4-Heptafluorobutane-1,1-diyl)di(1H-pyrrole) (6E)-1,1,1,2,2,3,3,10,10,11,11,12,12-Tetradecafluoro-4,4,9,9-tetrakis(trifluoromethyl)dodec-6-ene | 57912-15-9   | FC(F)(F)C(F)(F)C(F)(F)C(C=NCC1=CC=CC=C1)=NCC1=CC=CC=C1                        | -6.85 | 17.07 | 2.68 | P | OUT |
| QL02370 | 2,2'-(2,2,3,3,4,4,4-Heptafluorobutane-1,1-diyl)di(1H-pyrrole) (6E)-1,1,1,2,2,3,3,10,10,11,11,12,12-Tetradecafluoro-4,4,9,9-tetrakis(trifluoromethyl)dodec-6-ene | 164792-01-2  | FC(F)(F)C(F)(F)C(F)(F)C(C1NCCC1)C1NCCC1                                       | -5.45 | 23.33 | 1.87 | P | OUT |
| QL02371 | Bis(4-[3,3,4,4,5,5,5-heptafluoro-2,2-bis(trifluoromethyl)pentyl]phenyl)phosphane                                                                                | 1946796-71-9 | FC(F)(F)C(F)(F)C(F)(F)C(C1=CC=C(C=C1)P(C1=CC=CC=C1)C1=CC=C(C(F)(F)F)C(F)(F)F  | -8.29 | 54.17 | 2.35 | P | IN  |
| QL02372 | 1-Bromo-4-[3,3,4,4,5,5,5-heptafluoro-2,2-bis(trifluoromethyl)pentyl]phenyl)phosphane                                                                            | 322647-83-6  | FC(F)(F)C(F)(F)C(F)(F)C(C1=CC=C(C=C1)P(C1=CC=CC=C1)C1=CC=C(C(F)(F)F)C(F)(F)F  | -8.69 | 34.21 | 3.07 | P | OUT |
| QL02373 | 1-Bromo-4-[3,3,4,4,5,5,5-heptafluoro-2,2-bis(trifluoromethyl)pentyl]benzene                                                                                     | 149068-60-0  | FC(F)(F)C(F)(F)C(F)(F)C(C1ccccc1Br)C1(C(F)(F)C(F)(F)F                         | -7.38 | 42.42 | 2.25 | P | IN  |
| QL02374 | Tris(4-[3,3,4,4,5,5,5-heptafluoro-2,2-bis(trifluoromethyl)pentyl]phenyl)phosphane                                                                               | 322647-82-5  | FC(F)(F)C(F)(F)C(F)(F)C(C1ccccc1)P(C1ccccc1)C(C(F)(F)C(F)(F)F)C(F)(F)C(F)(F)F | -8.81 | 40.21 | 2.96 | P | IN  |
| QL02375 | 2-[3,3,4,4,5,5,5-Heptafluoro-2,2-bis(trifluoromethyl)pentyl]oxirane                                                                                             | 119285-89-1  | FC(F)(F)C(F)(F)C(F)(F)C(C1CO1)(C(F)(F)C(F)(F)F                                | -6.65 | 46.43 | 1.81 | P | IN  |
| QL02376 | 6-Bromo-1,1,1,2,2,3,3-heptafluoro-4,4-bis(trifluoromethyl)hexane                                                                                                | 128454-91-1  | FC(F)(F)C(F)(F)C(F)(F)C(CCBBr)(C(F)(F)C(F)(F)F                                | -7.03 | 53.85 | 1.79 | P | IN  |
| QL02377 | 1,1,1,2,2,3,3-heptafluoro-6-iodo-4,4-bis(trifluoromethyl)hexane                                                                                                 | 115347-68-7  | FC(F)(F)C(F)(F)C(F)(F)C(CI)C(C(F)(F)C(F)(F)F                                  | -7.03 | 53.85 | 1.79 | P | IN  |
| QL02378 | 2-Chloro(perfluoro-2-methylpentane)                                                                                                                             | 67437-97-2   | FC(F)(F)C(F)(F)C(F)(F)C(Cl)C(F)(F)C(F)(F)F                                    | -7.81 | 70.00 | 1.72 | P | OUT |
| QL02379 | Trichloroheptafluorobutane                                                                                                                                      | 28984-80-7   | FC(F)(F)C(F)(F)C(F)(F)C(Cl)C(Cl)C(Cl)                                         | -7.30 | 71.43 | 1.45 | P | OUT |
| QL02380 | Heptafluorobutyl Chloride                                                                                                                                       | 375-16-6     | FC(F)(F)C(F)(F)C(F)(F)C(Cl)O                                                  | -6.75 | 61.54 | 1.46 | P | OUT |
| QL02381 | 4,5-Dichloro-1,1,1,2,2,3,3-heptafluoropentane                                                                                                                   | 577773-57-0  | FC(F)(F)C(F)(F)C(F)(F)C(Cl)C(Cl)                                              | -7.08 | 52.94 | 1.84 | P | IN  |
| QL02382 | 1,1,1,2,4,5,5,6,6,7,7,7-dodecafluoro-2,4-bis(trifluoromethyl)heptan-3-one                                                                                       |              |                                                                               |       |       |      |   |     |

[illegible]

[illegible]



[illegible]





[illegible]



[illegible]



[illegible]

[illegible]



|         |                                               |             |                                                                                                                                                                                                                                                                                                                                                                                                                                                                                                                                                                                                                                                                                                                                                                                                                                                                                                                                                                                                                                                                                                                                                                                                                                                                                                                                                                                                                                                                                                                                                                                                                                                                                                                                                                                                                                                                                                                                                                                                                                                                                                                                                                                                                                                                                                                                                                                                                                                                                                                                                                                                                                                                                                                                                                                                                                                                                                                                                                                                                                                                                                                                                                                                                                                                                                                                                                                                                                                                                                                                                                                                                                                                                                                                                                                                                                                                                                                                                                                                                                                                                                                                                                                                                                                                                                                                                                                                                                                                                                                                                                                                                                                                                                                                                                                                                                                                                                                                                                                                                                                                                                                                                                                                                                                                                                                                                                                                                                                                                                                                                                                                                                                                                                                                                                                                                                                                                                                                                                                                                                                                                                                                                                                                                                                                                                                                                                                                                                                                                                                                                                                                                                                                                                                                                                                                                                                                                                                                                                                                                                                                                                                                                                                                                                                                                                                                                                                                                                                                                                                                                                                                                                                                                                                                                                                                                                                                                                                                                                                                                                                                                                                                                                                                                                                                                                                                                                                                                                                                                                                                                                                                                                                                                                                                                                                                                                                                                                                                                                                                                                                                                                                                                                                                                                                                                                                                                                                                                                                                                                                                                                                                                                                                                                                                                                                                                                                                                                                                                                                                                                                                                                                                                                                                                                                                                                                                                                                                                                                                                                                                                                                                                                                                                                                                                                                                                                                                                                                                                                                                            |        |       |      |   |     |
|---------|-----------------------------------------------|-------------|------------------------------------------------------------------------------------------------------------------------------------------------------------------------------------------------------------------------------------------------------------------------------------------------------------------------------------------------------------------------------------------------------------------------------------------------------------------------------------------------------------------------------------------------------------------------------------------------------------------------------------------------------------------------------------------------------------------------------------------------------------------------------------------------------------------------------------------------------------------------------------------------------------------------------------------------------------------------------------------------------------------------------------------------------------------------------------------------------------------------------------------------------------------------------------------------------------------------------------------------------------------------------------------------------------------------------------------------------------------------------------------------------------------------------------------------------------------------------------------------------------------------------------------------------------------------------------------------------------------------------------------------------------------------------------------------------------------------------------------------------------------------------------------------------------------------------------------------------------------------------------------------------------------------------------------------------------------------------------------------------------------------------------------------------------------------------------------------------------------------------------------------------------------------------------------------------------------------------------------------------------------------------------------------------------------------------------------------------------------------------------------------------------------------------------------------------------------------------------------------------------------------------------------------------------------------------------------------------------------------------------------------------------------------------------------------------------------------------------------------------------------------------------------------------------------------------------------------------------------------------------------------------------------------------------------------------------------------------------------------------------------------------------------------------------------------------------------------------------------------------------------------------------------------------------------------------------------------------------------------------------------------------------------------------------------------------------------------------------------------------------------------------------------------------------------------------------------------------------------------------------------------------------------------------------------------------------------------------------------------------------------------------------------------------------------------------------------------------------------------------------------------------------------------------------------------------------------------------------------------------------------------------------------------------------------------------------------------------------------------------------------------------------------------------------------------------------------------------------------------------------------------------------------------------------------------------------------------------------------------------------------------------------------------------------------------------------------------------------------------------------------------------------------------------------------------------------------------------------------------------------------------------------------------------------------------------------------------------------------------------------------------------------------------------------------------------------------------------------------------------------------------------------------------------------------------------------------------------------------------------------------------------------------------------------------------------------------------------------------------------------------------------------------------------------------------------------------------------------------------------------------------------------------------------------------------------------------------------------------------------------------------------------------------------------------------------------------------------------------------------------------------------------------------------------------------------------------------------------------------------------------------------------------------------------------------------------------------------------------------------------------------------------------------------------------------------------------------------------------------------------------------------------------------------------------------------------------------------------------------------------------------------------------------------------------------------------------------------------------------------------------------------------------------------------------------------------------------------------------------------------------------------------------------------------------------------------------------------------------------------------------------------------------------------------------------------------------------------------------------------------------------------------------------------------------------------------------------------------------------------------------------------------------------------------------------------------------------------------------------------------------------------------------------------------------------------------------------------------------------------------------------------------------------------------------------------------------------------------------------------------------------------------------------------------------------------------------------------------------------------------------------------------------------------------------------------------------------------------------------------------------------------------------------------------------------------------------------------------------------------------------------------------------------------------------------------------------------------------------------------------------------------------------------------------------------------------------------------------------------------------------------------------------------------------------------------------------------------------------------------------------------------------------------------------------------------------------------------------------------------------------------------------------------------------------------------------------------------------------------------------------------------------------------------------------------------------------------------------------------------------------------------------------------------------------------------------------------------------------------------------------------------------------------------------------------------------------------------------------------------------------------------------------------------------------------------------------------------------------------------------------------------------------------------------------------------------------------------------------------------------------------------------------------------------------------------------------------------------------------------------------------------------------------------------------------------------------------------------------------------------------------------------------------------------------------------------------------------------------------------------------------------------------------------------------------------------------------------------------------------------------------------------------------------------------------------------------------------------------------------------------------------------------------------------------------------------------------------------------------------------------------------------------------------------------------------------------------------------------------------------------------------------------------------------------------------------------------------------------------------------------------------------------------------------------------------------------------------------------------------------------------------------------------------------------------------------------------------------------------------------------------------------------------------------------------------------------------------------------------------------------------------------------------------------------------------------------------------------------------------------------------------------------------------------------------------------------------------------------------------------------------------------------------------------------------------------------------------------------------------------------------------------------------------------------------------------------------------------------------------------------------------------------------------------------------------------------------------------------------------------------------------------------------------------------------------------------------------------------------------------------------------------------------------------------------------------------------------------------------------------------------------------------------------------------------------------------------------------------------------------------------------------------------------------------------------------------------------------------------------------|--------|-------|------|---|-----|
| QL02880 | [(Tridecafluorohexyl)sulfanyl]benzene         | 69127-72-6  | FC(F)(F)C(F)C(F)C(F)C(F)C(F)C(F)C(F)SC1=CC=CC=C1                                                                                                                                                                                                                                                                                                                                                                                                                                                                                                                                                                                                                                                                                                                                                                                                                                                                                                                                                                                                                                                                                                                                                                                                                                                                                                                                                                                                                                                                                                                                                                                                                                                                                                                                                                                                                                                                                                                                                                                                                                                                                                                                                                                                                                                                                                                                                                                                                                                                                                                                                                                                                                                                                                                                                                                                                                                                                                                                                                                                                                                                                                                                                                                                                                                                                                                                                                                                                                                                                                                                                                                                                                                                                                                                                                                                                                                                                                                                                                                                                                                                                                                                                                                                                                                                                                                                                                                                                                                                                                                                                                                                                                                                                                                                                                                                                                                                                                                                                                                                                                                                                                                                                                                                                                                                                                                                                                                                                                                                                                                                                                                                                                                                                                                                                                                                                                                                                                                                                                                                                                                                                                                                                                                                                                                                                                                                                                                                                                                                                                                                                                                                                                                                                                                                                                                                                                                                                                                                                                                                                                                                                                                                                                                                                                                                                                                                                                                                                                                                                                                                                                                                                                                                                                                                                                                                                                                                                                                                                                                                                                                                                                                                                                                                                                                                                                                                                                                                                                                                                                                                                                                                                                                                                                                                                                                                                                                                                                                                                                                                                                                                                                                                                                                                                                                                                                                                                                                                                                                                                                                                                                                                                                                                                                                                                                                                                                                                                                                                                                                                                                                                                                                                                                                                                                                                                                                                                                                                                                                                                                                                                                                                                                                                                                                                                                                                                                                                                                                                                           | -7.94  | 41.94 | 2.52 | P | IN  |
| QL02881 | Tridecafluorohexanesulphenyl chloride         | 89987-98-4  | FC(F)(F)C(F)C(F)C(F)C(F)C(F)C(F)C(F)S(Cl)                                                                                                                                                                                                                                                                                                                                                                                                                                                                                                                                                                                                                                                                                                                                                                                                                                                                                                                                                                                                                                                                                                                                                                                                                                                                                                                                                                                                                                                                                                                                                                                                                                                                                                                                                                                                                                                                                                                                                                                                                                                                                                                                                                                                                                                                                                                                                                                                                                                                                                                                                                                                                                                                                                                                                                                                                                                                                                                                                                                                                                                                                                                                                                                                                                                                                                                                                                                                                                                                                                                                                                                                                                                                                                                                                                                                                                                                                                                                                                                                                                                                                                                                                                                                                                                                                                                                                                                                                                                                                                                                                                                                                                                                                                                                                                                                                                                                                                                                                                                                                                                                                                                                                                                                                                                                                                                                                                                                                                                                                                                                                                                                                                                                                                                                                                                                                                                                                                                                                                                                                                                                                                                                                                                                                                                                                                                                                                                                                                                                                                                                                                                                                                                                                                                                                                                                                                                                                                                                                                                                                                                                                                                                                                                                                                                                                                                                                                                                                                                                                                                                                                                                                                                                                                                                                                                                                                                                                                                                                                                                                                                                                                                                                                                                                                                                                                                                                                                                                                                                                                                                                                                                                                                                                                                                                                                                                                                                                                                                                                                                                                                                                                                                                                                                                                                                                                                                                                                                                                                                                                                                                                                                                                                                                                                                                                                                                                                                                                                                                                                                                                                                                                                                                                                                                                                                                                                                                                                                                                                                                                                                                                                                                                                                                                                                                                                                                                                                                                                                                                  | -8.57  | 66.67 | 2.15 | P | OUT |
| QL02882 | Bis(tridecafluorohexyl) disulphide            | 93962-52-8  | FC(F)(F)C(F)C(F)C(F)C(F)C(F)C(F)C(F)SSC(F)(F)C(F)C(F)C(F)C(F)C(F)C(F)F                                                                                                                                                                                                                                                                                                                                                                                                                                                                                                                                                                                                                                                                                                                                                                                                                                                                                                                                                                                                                                                                                                                                                                                                                                                                                                                                                                                                                                                                                                                                                                                                                                                                                                                                                                                                                                                                                                                                                                                                                                                                                                                                                                                                                                                                                                                                                                                                                                                                                                                                                                                                                                                                                                                                                                                                                                                                                                                                                                                                                                                                                                                                                                                                                                                                                                                                                                                                                                                                                                                                                                                                                                                                                                                                                                                                                                                                                                                                                                                                                                                                                                                                                                                                                                                                                                                                                                                                                                                                                                                                                                                                                                                                                                                                                                                                                                                                                                                                                                                                                                                                                                                                                                                                                                                                                                                                                                                                                                                                                                                                                                                                                                                                                                                                                                                                                                                                                                                                                                                                                                                                                                                                                                                                                                                                                                                                                                                                                                                                                                                                                                                                                                                                                                                                                                                                                                                                                                                                                                                                                                                                                                                                                                                                                                                                                                                                                                                                                                                                                                                                                                                                                                                                                                                                                                                                                                                                                                                                                                                                                                                                                                                                                                                                                                                                                                                                                                                                                                                                                                                                                                                                                                                                                                                                                                                                                                                                                                                                                                                                                                                                                                                                                                                                                                                                                                                                                                                                                                                                                                                                                                                                                                                                                                                                                                                                                                                                                                                                                                                                                                                                                                                                                                                                                                                                                                                                                                                                                                                                                                                                                                                                                                                                                                                                                                                                                                                                                                                                     | -10.10 | 65.00 | 2.90 | P | OUT |
| QL02883 | Pentadecafluoro-2-iodoheptane                 | 24394-25-0  | FC(F)(F)C(F)C(F)C(F)C(F)C(F)C(F)C(F)C(I)C(F)F                                                                                                                                                                                                                                                                                                                                                                                                                                                                                                                                                                                                                                                                                                                                                                                                                                                                                                                                                                                                                                                                                                                                                                                                                                                                                                                                                                                                                                                                                                                                                                                                                                                                                                                                                                                                                                                                                                                                                                                                                                                                                                                                                                                                                                                                                                                                                                                                                                                                                                                                                                                                                                                                                                                                                                                                                                                                                                                                                                                                                                                                                                                                                                                                                                                                                                                                                                                                                                                                                                                                                                                                                                                                                                                                                                                                                                                                                                                                                                                                                                                                                                                                                                                                                                                                                                                                                                                                                                                                                                                                                                                                                                                                                                                                                                                                                                                                                                                                                                                                                                                                                                                                                                                                                                                                                                                                                                                                                                                                                                                                                                                                                                                                                                                                                                                                                                                                                                                                                                                                                                                                                                                                                                                                                                                                                                                                                                                                                                                                                                                                                                                                                                                                                                                                                                                                                                                                                                                                                                                                                                                                                                                                                                                                                                                                                                                                                                                                                                                                                                                                                                                                                                                                                                                                                                                                                                                                                                                                                                                                                                                                                                                                                                                                                                                                                                                                                                                                                                                                                                                                                                                                                                                                                                                                                                                                                                                                                                                                                                                                                                                                                                                                                                                                                                                                                                                                                                                                                                                                                                                                                                                                                                                                                                                                                                                                                                                                                                                                                                                                                                                                                                                                                                                                                                                                                                                                                                                                                                                                                                                                                                                                                                                                                                                                                                                                                                                                                                                                                              | -8.73  | 69.57 | 2.15 | P | OUT |
| QL02884 | Undecafluorohexanenitrile                     | 23790-49-0  | FC(F)C(F)C(F)C(F)C(F)C(F)C(F)C(F)C#N                                                                                                                                                                                                                                                                                                                                                                                                                                                                                                                                                                                                                                                                                                                                                                                                                                                                                                                                                                                                                                                                                                                                                                                                                                                                                                                                                                                                                                                                                                                                                                                                                                                                                                                                                                                                                                                                                                                                                                                                                                                                                                                                                                                                                                                                                                                                                                                                                                                                                                                                                                                                                                                                                                                                                                                                                                                                                                                                                                                                                                                                                                                                                                                                                                                                                                                                                                                                                                                                                                                                                                                                                                                                                                                                                                                                                                                                                                                                                                                                                                                                                                                                                                                                                                                                                                                                                                                                                                                                                                                                                                                                                                                                                                                                                                                                                                                                                                                                                                                                                                                                                                                                                                                                                                                                                                                                                                                                                                                                                                                                                                                                                                                                                                                                                                                                                                                                                                                                                                                                                                                                                                                                                                                                                                                                                                                                                                                                                                                                                                                                                                                                                                                                                                                                                                                                                                                                                                                                                                                                                                                                                                                                                                                                                                                                                                                                                                                                                                                                                                                                                                                                                                                                                                                                                                                                                                                                                                                                                                                                                                                                                                                                                                                                                                                                                                                                                                                                                                                                                                                                                                                                                                                                                                                                                                                                                                                                                                                                                                                                                                                                                                                                                                                                                                                                                                                                                                                                                                                                                                                                                                                                                                                                                                                                                                                                                                                                                                                                                                                                                                                                                                                                                                                                                                                                                                                                                                                                                                                                                                                                                                                                                                                                                                                                                                                                                                                                                                                                                                       | -7.67  | 61.11 | 1.89 | P | IN  |
| QL02885 | 3,3,4,4,5,5,6,6,7,7,7-Undecafluorohept-1-ene  | 84100-13-0  | FC(F)(F)C(F)C(F)C(F)C(F)C(F)C(F)C=C                                                                                                                                                                                                                                                                                                                                                                                                                                                                                                                                                                                                                                                                                                                                                                                                                                                                                                                                                                                                                                                                                                                                                                                                                                                                                                                                                                                                                                                                                                                                                                                                                                                                                                                                                                                                                                                                                                                                                                                                                                                                                                                                                                                                                                                                                                                                                                                                                                                                                                                                                                                                                                                                                                                                                                                                                                                                                                                                                                                                                                                                                                                                                                                                                                                                                                                                                                                                                                                                                                                                                                                                                                                                                                                                                                                                                                                                                                                                                                                                                                                                                                                                                                                                                                                                                                                                                                                                                                                                                                                                                                                                                                                                                                                                                                                                                                                                                                                                                                                                                                                                                                                                                                                                                                                                                                                                                                                                                                                                                                                                                                                                                                                                                                                                                                                                                                                                                                                                                                                                                                                                                                                                                                                                                                                                                                                                                                                                                                                                                                                                                                                                                                                                                                                                                                                                                                                                                                                                                                                                                                                                                                                                                                                                                                                                                                                                                                                                                                                                                                                                                                                                                                                                                                                                                                                                                                                                                                                                                                                                                                                                                                                                                                                                                                                                                                                                                                                                                                                                                                                                                                                                                                                                                                                                                                                                                                                                                                                                                                                                                                                                                                                                                                                                                                                                                                                                                                                                                                                                                                                                                                                                                                                                                                                                                                                                                                                                                                                                                                                                                                                                                                                                                                                                                                                                                                                                                                                                                                                                                                                                                                                                                                                                                                                                                                                                                                                                                                                                                                        | -7.17  | 52.38 | 1.89 | P | IN  |
| QL02886 | 2,2,3,3,4,4,5,5,6,6-Undecafluorohexanal       | 754-79-0    | FC(F)C(F)C(F)C(F)C(F)C(F)C(F)C(F)C=O                                                                                                                                                                                                                                                                                                                                                                                                                                                                                                                                                                                                                                                                                                                                                                                                                                                                                                                                                                                                                                                                                                                                                                                                                                                                                                                                                                                                                                                                                                                                                                                                                                                                                                                                                                                                                                                                                                                                                                                                                                                                                                                                                                                                                                                                                                                                                                                                                                                                                                                                                                                                                                                                                                                                                                                                                                                                                                                                                                                                                                                                                                                                                                                                                                                                                                                                                                                                                                                                                                                                                                                                                                                                                                                                                                                                                                                                                                                                                                                                                                                                                                                                                                                                                                                                                                                                                                                                                                                                                                                                                                                                                                                                                                                                                                                                                                                                                                                                                                                                                                                                                                                                                                                                                                                                                                                                                                                                                                                                                                                                                                                                                                                                                                                                                                                                                                                                                                                                                                                                                                                                                                                                                                                                                                                                                                                                                                                                                                                                                                                                                                                                                                                                                                                                                                                                                                                                                                                                                                                                                                                                                                                                                                                                                                                                                                                                                                                                                                                                                                                                                                                                                                                                                                                                                                                                                                                                                                                                                                                                                                                                                                                                                                                                                                                                                                                                                                                                                                                                                                                                                                                                                                                                                                                                                                                                                                                                                                                                                                                                                                                                                                                                                                                                                                                                                                                                                                                                                                                                                                                                                                                                                                                                                                                                                                                                                                                                                                                                                                                                                                                                                                                                                                                                                                                                                                                                                                                                                                                                                                                                                                                                                                                                                                                                                                                                                                                                                                                                                                       | -7.49  | 57.89 | 1.89 | P | IN  |
| QL02887 | 5-(Undecafluoropentyl)-1H-imidazole           | 113934-18-2 | FC(F)(F)C(F)C(F)C(F)C(F)C(F)C(F)C1=CN=CN1                                                                                                                                                                                                                                                                                                                                                                                                                                                                                                                                                                                                                                                                                                                                                                                                                                                                                                                                                                                                                                                                                                                                                                                                                                                                                                                                                                                                                                                                                                                                                                                                                                                                                                                                                                                                                                                                                                                                                                                                                                                                                                                                                                                                                                                                                                                                                                                                                                                                                                                                                                                                                                                                                                                                                                                                                                                                                                                                                                                                                                                                                                                                                                                                                                                                                                                                                                                                                                                                                                                                                                                                                                                                                                                                                                                                                                                                                                                                                                                                                                                                                                                                                                                                                                                                                                                                                                                                                                                                                                                                                                                                                                                                                                                                                                                                                                                                                                                                                                                                                                                                                                                                                                                                                                                                                                                                                                                                                                                                                                                                                                                                                                                                                                                                                                                                                                                                                                                                                                                                                                                                                                                                                                                                                                                                                                                                                                                                                                                                                                                                                                                                                                                                                                                                                                                                                                                                                                                                                                                                                                                                                                                                                                                                                                                                                                                                                                                                                                                                                                                                                                                                                                                                                                                                                                                                                                                                                                                                                                                                                                                                                                                                                                                                                                                                                                                                                                                                                                                                                                                                                                                                                                                                                                                                                                                                                                                                                                                                                                                                                                                                                                                                                                                                                                                                                                                                                                                                                                                                                                                                                                                                                                                                                                                                                                                                                                                                                                                                                                                                                                                                                                                                                                                                                                                                                                                                                                                                                                                                                                                                                                                                                                                                                                                                                                                                                                                                                                                                                                  | -7.39  | 45.83 | 2.17 | P | IN  |
| QL02888 | 2,4,6-Tris(undecafluoropentyl)-1,3,5-triazine | 23790-50-3  | FC(F)C(F)C(F)C(F)C(F)C(F)C(F)C(F)C(F)C(F)C(F)C(F)C(F)C(F)C(F)C(F)C(F)C(F)C(F)C(F)C(F)C(F)C(F)C(F)C(F)C(F)C(F)C(F)C(F)C(F)C(F)C(F)C(F)C(F)C(F)C(F)C(F)C(F)C(F)C(F)C(F)C(F)C(F)C(F)C(F)C(F)C(F)C(F)C(F)C(F)C(F)C(F)C(F)C(F)C(F)C(F)C(F)C(F)C(F)C(F)C(F)C(F)C(F)C(F)C(F)C(F)C(F)C(F)C(F)C(F)C(F)C(F)C(F)C(F)C(F)C(F)C(F)C(F)C(F)C(F)C(F)C(F)C(F)C(F)C(F)C(F)C(F)C(F)C(F)C(F)C(F)C(F)C(F)C(F)C(F)C(F)C(F)C(F)C(F)C(F)C(F)C(F)C(F)C(F)C(F)C(F)C(F)C(F)C(F)C(F)C(F)C(F)C(F)C(F)C(F)C(F)C(F)C(F)C(F)C(F)C(F)C(F)C(F)C(F)C(F)C(F)C(F)C(F)C(F)C(F)C(F)C(F)C(F)C(F)C(F)C(F)C(F)C(F)C(F)C(F)C(F)C(F)C(F)C(F)C(F)C(F)C(F)C(F)C(F)C(F)C(F)C(F)C(F)C(F)C(F)C(F)C(F)C(F)C(F)C(F)C(F)C(F)C(F)C(F)C(F)C(F)C(F)C(F)C(F)C(F)C(F)C(F)C(F)C(F)C(F)C(F)C(F)C(F)C(F)C(F)C(F)C(F)C(F)C(F)C(F)C(F)C(F)C(F)C(F)C(F)C(F)C(F)C(F)C(F)C(F)C(F)C(F)C(F)C(F)C(F)C(F)C(F)C(F)C(F)C(F)C(F)C(F)C(F)C(F)C(F)C(F)C(F)C(F)C(F)C(F)C(F)C(F)C(F)C(F)C(F)C(F)C(F)C(F)C(F)C(F)C(F)C(F)C(F)C(F)C(F)C(F)C(F)C(F)C(F)C(F)C(F)C(F)C(F)C(F)C(F)C(F)C(F)C(F)C(F)C(F)C(F)C(F)C(F)C(F)C(F)C(F)C(F)C(F)C(F)C(F)C(F)C(F)C(F)C(F)C(F)C(F)C(F)C(F)C(F)C(F)C(F)C(F)C(F)C(F)C(F)C(F)C(F)C(F)C(F)C(F)C(F)C(F)C(F)C(F)C(F)C(F)C(F)C(F)C(F)C(F)C(F)C(F)C(F)C(F)C(F)C(F)C(F)C(F)C(F)C(F)C(F)C(F)C(F)C(F)C(F)C(F)C(F)C(F)C(F)C(F)C(F)C(F)C(F)C(F)C(F)C(F)C(F)C(F)C(F)C(F)C(F)C(F)C(F)C(F)C(F)C(F)C(F)C(F)C(F)C(F)C(F)C(F)C(F)C(F)C(F)C(F)C(F)C(F)C(F)C(F)C(F)C(F)C(F)C(F)C(F)C(F)C(F)C(F)C(F)C(F)C(F)C(F)C(F)C(F)C(F)C(F)C(F)C(F)C(F)C(F)C(F)C(F)C(F)C(F)C(F)C(F)C(F)C(F)C(F)C(F)C(F)C(F)C(F)C(F)C(F)C(F)C(F)C(F)C(F)C(F)C(F)C(F)C(F)C(F)C(F)C(F)C(F)C(F)C(F)C(F)C(F)C(F)C(F)C(F)C(F)C(F)C(F)C(F)C(F)C(F)C(F)C(F)C(F)C(F)C(F)C(F)C(F)C(F)C(F)C(F)C(F)C(F)C(F)C(F)C(F)C(F)C(F)C(F)C(F)C(F)C(F)C(F)C(F)C(F)C(F)C(F)C(F)C(F)C(F)C(F)C(F)C(F)C(F)C(F)C(F)C(F)C(F)C(F)C(F)C(F)C(F)C(F)C(F)C(F)C(F)C(F)C(F)C(F)C(F)C(F)C(F)C(F)C(F)C(F)C(F)C(F)C(F)C(F)C(F)C(F)C(F)C(F)C(F)C(F)C(F)C(F)C(F)C(F)C(F)C(F)C(F)C(F)C(F)C(F)C(F)C(F)C(F)C(F)C(F)C(F)C(F)C(F)C(F)C(F)C(F)C(F)C(F)C(F)C(F)C(F)C(F)C(F)C(F)C(F)C(F)C(F)C(F)C(F)C(F)C(F)C(F)C(F)C(F)C(F)C(F)C(F)C(F)C(F)C(F)C(F)C(F)C(F)C(F)C(F)C(F)C(F)C(F)C(F)C(F)C(F)C(F)C(F)C(F)C(F)C(F)C(F)C(F)C(F)C(F)C(F)C(F)C(F)C(F)C(F)C(F)C(F)C(F)C(F)C(F)C(F)C(F)C(F)C(F)C(F)C(F)C(F)C(F)C(F)C(F)C(F)C(F)C(F)C(F)C(F)C(F)C(F)C(F)C(F)C(F)C(F)C(F)C(F)C(F)C(F)C(F)C(F)C(F)C(F)C(F)C(F)C(F)C(F)C(F)C(F)C(F)C(F)C(F)C(F)C(F)C(F)C(F)C(F)C(F)C(F)C(F)C(F)C(F)C(F)C(F)C(F)C(F)C(F)C(F)C(F)C(F)C(F)C(F)C(F)C(F)C(F)C(F)C(F)C(F)C(F)C(F)C(F)C(F)C(F)C(F)C(F)C(F)C(F)C(F)C(F)C(F)C(F)C(F)C(F)C(F)C(F)C(F)C(F)C(F)C(F)C(F)C(F)C(F)C(F)C(F)C(F)C(F)C(F)C(F)C(F)C(F)C(F)C(F)C(F)C(F)C(F)C(F)C(F)C(F)C(F)C(F)C(F)C(F)C(F)C(F)C(F)C(F)C(F)C(F)C(F)C(F)C(F)C(F)C(F)C(F)C(F)C(F)C(F)C(F)C(F)C(F)C(F)C(F)C(F)C(F)C(F)C(F)C(F)C(F)C(F)C(F)C(F)C(F)C(F)C(F)C(F)C(F)C(F)C(F)C(F)C(F)C(F)C(F)C(F)C(F)C(F)C(F)C(F)C(F)C(F)C(F)C(F)C(F)C(F)C(F)C(F)C(F)C(F)C(F)C(F)C(F)C(F)C(F)C(F)C(F)C(F)C(F)C(F)C(F)C(F)C(F)C(F)C(F)C(F)C(F)C(F)C(F)C(F)C(F)C(F)C(F)C(F)C(F)C(F)C(F)C(F)C(F)C(F)C(F)C(F)C(F)C(F)C(F)C(F)C(F)C(F)C(F)C(F)C(F)C(F)C(F)C(F)C(F)C(F)C(F)C(F)C(F)C(F)C(F)C(F)C(F)C(F)C(F)C(F)C(F)C(F)C(F)C(F)C(F)C(F)C(F)C(F)C(F)C(F)C(F)C(F)C(F)C(F)C(F)C(F)C(F)C(F)C(F)C(F)C(F)C(F)C(F)C(F)C(F)C(F)C(F)C(F)C(F)C(F)C(F)C(F)C(F)C(F)C(F)C(F)C(F)C(F)C(F)C(F)C(F)C(F)C(F)C(F)C(F)C(F)C(F)C(F)C(F)C(F)C(F)C(F)C(F)C(F)C(F)C(F)C(F)C(F)C(F)C(F)C(F)C(F)C(F)C(F)C(F)C(F)C(F)C(F)C(F)C(F)C(F)C(F)C(F)C(F)C(F)C(F)C(F)C(F)C(F)C(F)C(F)C(F)C(F)C(F)C(F)C(F)C(F)C(F)C(F)C(F)C(F)C(F)C(F)C(F)C(F)C(F)C(F)C(F)C(F)C(F)C(F)C(F)C(F)C(F)C(F)C(F)C(F)C(F)C(F)C(F)C(F)C(F)C(F)C(F)C(F)C(F)C(F)C(F)C(F)C(F)C(F)C(F)C(F)C(F)C(F)C(F)C(F)C(F)C(F)C(F)C(F)C(F)C(F)C(F)C(F)C(F)C(F)C(F)C(F)C(F)C(F)C(F)C(F)C(F)C(F)C(F)C(F)C(F)C(F)C(F)C(F)C(F)C(F)C(F)C(F)C(F)C(F)C(F)C(F)C(F)C(F)C(F)C(F)C(F)C(F)C(F)C(F)C(F)C(F)C(F)C(F)C(F)C(F)C(F)C(F)C(F)C(F)C(F)C(F)C(F)C(F)C(F)C(F)C(F)C(F)C(F)C(F)C(F)C(F)C(F)C(F)C(F)C(F)C(F)C(F)C(F)C(F)C(F)C(F)C(F)C(F)C(F)C(F)C(F)C(F)C(F)C(F)C(F)C(F)C(F)C(F)C(F)C(F)C(F)C(F)C(F)C(F)C(F)C(F)C(F)C(F)C(F)C(F)C(F)C(F)C(F)C(F)C(F)C(F)C(F)C(F)C(F)C(F)C(F)C(F)C(F)C(F)C(F)C(F)C(F)C(F)C(F)C(F)C(F)C(F)C(F)C(F)C(F)C(F)C(F)C(F)C(F)C(F)C(F)C(F)C(F)C(F)C(F)C(F)C(F)C(F)C(F)C(F)C(F)C(F)C(F)C(F)C(F)C(F)C(F)C(F)C(F)C(F)C(F)C(F)C(F)C(F)C(F)C(F)C(F)C(F)C(F)C(F)C(F)C(F)C(F)C(F)C(F)C(F)C(F)C(F)C(F)C(F)C(F)C(F)C(F)C(F)C(F)C(F)C(F)C(F)C(F)C(F)C(F)C(F)C(F)C(F)C(F)C(F)C(F)C(F)C(F)C(F)C(F)C(F)C(F)C(F)C(F)C(F)C(F)C(F)C(F)C(F)C(F)C(F)C(F)C(F)C(F)C(F)C(F)C(F)C(F)C(F)C(F)C(F)C(F)C(F)C(F)C(F)C(F)C(F)C(F)C(F)C(F)C(F)C(F)C(F)C(F)C(F)C(F)C(F)C(F)C(F)C(F)C(F)C(F)C(F)C(F)C(F)C(F)C(F)C(F)C(F)C(F)C(F)C(F)C(F)C(F)C(F)C(F)C(F)C(F)C(F)C(F)C(F)C(F)C(F)C(F)C(F)C(F)C(F)C(F)C(F)C(F)C(F)C(F)C(F)C(F)C(F)C(F)C(F)C(F)C(F)C(F)C(F)C(F)C(F)C(F)C(F)C(F)C(F)C(F)C(F)C(F)C(F)C(F)C(F)C(F)C(F)C(F)C(F)C(F)C(F)C(F)C(F)C(F)C(F)C(F)C(F)C(F)C(F)C(F)C(F)C(F)C(F)C(F)C(F)C(F)C(F)C(F)C(F)C(F)C(F)C(F)C(F)C(F)C(F)C(F)C(F)C(F)C(F)C(F)C(F)C(F)C(F)C(F)C(F)C(F)C(F)C(F)C(F)C(F)C(F)C(F)C(F)C(F)C(F)C(F)C(F)C(F)C(F)C(F)C(F)C(F)C(F)C(F)C(F)C(F)C(F)C(F)C(F)C(F)C(F)C(F)C(F)C(F)C(F)C(F)C(F)C(F)C(F)C(F)C(F)C(F)C(F)C(F)C(F)C(F)C(F)C(F)C(F)C(F)C(F)C(F)C(F)C(F)C(F)C(F)C(F)C(F)C(F)C(F)C(F)C(F)C(F)C(F)C(F)C(F)C(F)C(F)C(F)C(F)C(F)C(F)C(F)C(F)C(F)C(F)C(F)C(F)C(F)C(F)C(F)C(F)C(F)C(F)C(F)C(F)C(F)C(F)C(F)C(F)C(F)C(F)C(F)C(F)C(F)C(F)C(F)C(F)C(F)C(F)C(F)C(F)C(F)C(F)C(F)C(F)C(F)C(F)C(F)C(F)C(F)C(F)C(F)C(F)C(F)C(F)C(F)C(F)C(F)C(F)C(F)C(F)C(F)C(F)C(F)C(F)C(F)C(F)C(F)C(F)C(F)C(F)C(F)C(F)C(F)C(F)C(F)C(F)C(F)C(F)C(F)C(F)C(F)C(F)C(F)C(F)C(F)C(F)C(F)C(F)C(F)C(F)C(F)C(F)C(F)C(F)C(F)C(F)C(F)C(F)C(F)C(F)C(F)C(F)C(F)C(F)C(F)C(F)C(F)C(F)C(F)C(F)C(F)C(F)C(F)C(F)C(F)C(F)C(F)C(F)C(F)C(F)C(F)C(F)C(F)C(F)C(F)C(F)C(F)C(F)C(F)C(F)C(F)C(F)C(F)C(F)C(F)C(F)C(F)C(F)C(F)C(F)C(F)C(F)C(F)C(F)C(F)C(F)C(F)C(F)C(F)C(F)C(F)C(F)C(F)C(F)C(F)C(F)C(F)C(F)C(F)C(F)C(F)C(F)C(F)C(F)C(F)C(F)C(F)C(F)C(F)C(F)C(F)C(F)C(F)C(F)C(F)C(F)C(F)C(F)C(F)C(F)C(F)C(F)C(F)C(F)C(F)C(F)C(F)C(F)C(F)C(F)C(F)C(F)C(F)C(F)C(F)C(F)C(F)C(F)C(F)C(F)C(F)C(F)C(F)C(F)C(F)C(F)C(F)C(F)C(F)C(F)C(F)C(F)C(F)C(F)C(F)C(F)C(F)C(F)C(F)C(F)C(F)C(F)C(F)C(F)C(F)C(F)C(F)C(F)C(F)C(F)C(F)C(F)C(F)C(F)C(F)C(F)C(F)C(F)C(F)C(F)C(F)C(F)C(F)C(F)C(F)C(F)C(F)C(F)C(F)C(F)C(F)C(F)C(F)C(F)C(F)C(F)C(F)C(F)C(F)C(F)C(F)C(F)C(F)C(F)C(F)C(F)C(F)C(F)C(F)C(F)C(F)C(F)C(F)C(F)C(F)C(F)C(F)C(F)C(F)C(F)C(F)C(F)C(F)C(F)C(F)C(F)C(F)C(F)C(F)C(F)C(F)C(F)C(F)C(F)C(F)C(F)C(F)C(F)C(F)C(F)C(F)C(F)C(F)C(F)C(F)C(F)C(F)C(F)C(F)C(F)C(F)C(F)C(F)C(F)C(F)C(F)C(F)C(F)C(F)C(F)C(F)C(F)C(F)C(F)C(F)C(F)C(F)C(F)C(F)C(F)C(F)C(F)C(F)C(F)C(F)C(F)C(F)C(F)C(F)C(F)C(F)C(F)C(F)C(F)C(F)C(F)C(F)C(F)C(F)C(F)C(F)C(F)C(F)C(F)C(F)C(F)C(F)C(F)C(F)C(F)C(F)C(F)C(F)C(F)C(F)C(F)C(F)C(F)C(F)C(F)C(F)C(F)C(F)C(F)C(F)C(F)C(F)C(F)C(F)C(F)C(F)C(F)C(F)C(F)C(F)C(F)C(F)C(F)C(F)C(F)C(F)C(F)C(F)C(F)C(F)C(F)C(F)C(F)C(F)C(F)C(F)C(F)C(F)C(F)C(F)C(F)C(F)C(F)C(F)C(F)C(F)C(F)C(F)C(F)C(F)C(F)C(F)C(F)C(F)C(F)C(F)C(F)C(F)C(F)C(F)C(F)C(F)C(F)C(F)C(F)C(F)C(F)C(F)C(F)C(F)C(F)C(F)C(F)C(F)C(F)C(F)C(F)C(F)C(F)C(F)C(F)C(F)C(F)C(F)C(F)C(F)C(F)C(F)C(F)C(F)C(F)C(F)C(F)C(F)C(F)C(F)C(F)C(F)C(F)C(F)C(F)C(F)C(F)C(F)C(F)C(F)C(F)C(F)C(F)C(F)C(F)C(F)C(F)C(F)C(F)C(F)C(F)C(F)C(F)C(F)C(F)C(F)C(F)C(F)C(F)C(F)C(F)C(F)C(F)C(F)C(F)C(F)C(F)C(F)C(F)C(F)C(F)C(F)C(F)C(F)C(F)C(F)C(F)C(F)C(F)C(F)C(F)C(F)C(F)C(F)C(F)C(F)C(F)C(F)C(F)C(F)C(F)C(F)C(F)C(F)C(F)C(F)C(F)C(F)C(F)C(F)C(F)C(F)C(F)C(F)C(F)C(F)C(F)C(F)C(F)C(F)C(F)C(F)C(F)C(F)C(F)C(F)C(F)C(F)C(F)C(F)C(F)C(F)C(F)C(F)C(F)C(F)C(F)C(F)C(F)C(F)C(F)C(F)C(F)C(F)C(F)C(F)C(F)C(F)C(F)C(F)C(F)C(F)C(F)C(F)C(F)C(F)C(F)C(F)C(F)C(F)C(F)C(F)C(F)C(F)C(F)C(F)C(F)C(F)C(F)C(F)C(F)C(F)C(F)C(F)C(F)C(F)C(F)C(F)C(F)C(F)C(F)C(F)C(F)C(F)C(F)C(F)C(F)C(F)C(F)C(F)C(F)C(F)C(F)C(F)C(F)C(F)C(F)C(F)C(F)C(F)C(F)C(F)C(F)C(F)C(F)C(F)C(F)C(F)C(F)C(F)C(F)C(F)C(F)C(F)C(F)C(F)C(F)C(F)C(F)C(F)C(F)C(F)C(F)C(F)C(F)C(F)C(F)C(F)C(F)C(F)C(F)C(F)C(F)C(F)C(F)C(F)C(F)C(F)C(F)C(F)C(F)C(F)C(F)C(F)C(F)C(F)C(F)C(F)C(F)C(F)C(F)C(F)C(F)C(F)C(F)C(F)C(F)C(F)C(F)C(F)C(F)C(F)C(F)C(F)C(F)C(F)C(F)C(F)C(F)C(F)C(F)C(F)C(F)C(F)C(F)C(F)C(F)C(F)C(F)C(F)C(F)C(F)C(F)C(F)C(F)C(F)C(F)C(F)C(F)C(F)C(F)C(F)C(F)C(F)C(F)C(F)C(F)C(F)C(F)C(F)C(F)C(F)C(F)C(F)C(F)C(F)C(F)C(F)C(F)C(F)C(F)C(F)C(F)C(F)C(F)C(F)C(F)C(F)C(F)C(F)C(F)C(F)C(F)C(F)C(F)C(F)C(F)C(F)C(F)C(F)C(F)C(F)C(F)C(F)C(F)C(F)C(F)C(F)C(F)C(F)C(F)C(F)C(F)C(F)C(F)C(F)C(F)C(F)C(F)C(F)C(F)C(F)C(F)C(F)C(F)C(F)C(F)C(F)C(F)C(F)C(F)C(F)C(F)C(F)C(F)C(F)C(F)C(F)C(F)C(F)C(F)C(F)C(F)C(F)C(F)C(F)C(F)C(F)C(F)C(F)C(F)C(F)C(F)C(F)C(F)C(F)C(F)C(F)C(F)C(F)C(F)C(F)C(F)C(F)C(F)C(F)C(F)C(F)C(F)C(F)C(F)C(F)C(F)C(F)C(F)C(F)C(F)C(F)C(F)C(F)C(F)C(F)C(F)C(F)C(F)C(F)C(F)C(F)C(F)C(F)C(F)C(F)C(F)C(F)C(F)C(F)C(F)C(F)C(F)C(F)C(F)C(F)C(F)C(F)C(F)C(F)C(F)C(F)C(F)C(F)C(F)C(F)C(F)C(F)C(F)C(F)C(F)C(F)C(F)C(F)C(F)C(F)C(F)C(F)C(F)C(F)C(F)C(F)C(F)C(F)C(F)C(F)C(F)C(F)C(F)C(F)C(F)C(F)C(F)C(F)C(F)C(F)C(F)C(F)C(F)C(F)C(F)C(F)C(F)C(F)C(F)C(F)C(F)C(F)C(F)C(F)C(F)C(F)C(F)C(F)C(F)C(F)C(F)C(F)C(F)C(F)C(F)C(F)C(F)C(F)C(F)C(F)C(F)C(F)C(F)C(F)C(F)C(F)C(F)C(F)C(F)C(F)C(F)C(F)C(F)C(F)C(F)C(F)C(F)C(F)C(F)C(F)C(F)C(F)C(F)C(F)C(F)C(F)C(F)C(F)C(F)C(F)C(F)C(F)C(F)C(F)C(F)C(F)C(F)C(F)C(F)C(F)C(F)C(F)C(F)C(F)C(F)C(F)C(F)C(F)C(F)C(F)C(F)C(F)C(F)C(F)C(F)C(F)C(F)C(F)C(F)C(F)C(F)C(F)C(F)C(F)C(F)C(F)C(F)C(F)C(F)C(F)C(F)C(F)C(F)C(F)C(F)C(F)C(F)C(F)C(F)C(F)C(F)C(F)C(F)C(F)C(F)C(F)C(F)C(F)C(F)C(F)C(F)C(F)C(F)C(F)C(F)C(F)C(F)C(F)C(F)C(F)C(F)C(F)C(F)C(F)C(F)C(F)C(F)C(F)C(F)C(F)C(F)C(F)C(F)C(F)C(F)C(F)C(F)C(F)C(F)C(F)C(F)C(F)C(F)C(F)C(F)C(F)C(F)C(F)C(F)C(F)C(F)C(F)C(F)C(F)C(F)C(F)C(F)C(F)C(F)C(F)C(F)C(F)C(F)C(F)C(F)C(F)C(F)C(F)C(F)C(F)C(F)C(F)C(F)C(F)C(F)C(F)C(F)C(F)C(F)C(F)C(F)C(F)C(F)C(F)C(F)C(F)C(F)C(F)C(F)C(F)C(F)C(F)C(F)C(F)C(F)C(F)C(F)C(F)C(F)C(F)C(F)C(F)C(F)C(F)C(F)C(F)C(F)C(F)C(F)C(F)C(F)C(F)C(F)C(F)C(F)C(F)C(F)C(F)C(F)C(F)C(F)C(F)C(F)C(F)C(F)C(F)C(F)C(F)C(F)C(F)C(F)C(F)C(F)C(F)C(F)C(F)C(F)C(F)C(F)C(F)C(F)C(F)C(F)C(F)C(F)C(F)C(F)C(F)C(F)C(F)C(F)C(F)C(F)C(F)C(F)C(F)C(F)C(F)C(F)C(F)C(F)C(F)C(F)C(F)C(F)C(F)C(F)C(F)C(F)C(F)C(F)C(F)C(F)C(F)C(F)C(F)C(F)C(F)C(F)C(F)C(F)C(F)C(F)C(F)C(F)C(F)C(F)C(F)C(F)C(F)C(F)C(F)C(F)C(F)C(F)C(F)C(F)C(F)C(F)C(F)C(F)C(F)C(F)C(F)C(F)C(F)C(F)C(F)C(F)C(F)C(F)C(F)C(F)C(F)C(F)C(F)C(F)C(F)C(F)C(F)C(F)C(F)C(F)C(F)C(F)C(F)C(F)C(F)C(F)C(F)C(F)C(F)C(F)C(F)C(F)C(F)C(F)C(F)C(F)C(F)C(F)C(F)C(F)C(F)C(F)C(F)C(F)C(F)C(F)C(F)C(F)C(F)C(F)C(F)C(F)C(F)C(F)C(F)C(F)C(F)C(F)C(F)C(F)C(F)C(F)C(F)C(F)C(F)C(F)C(F)C(F)C(F)C(F)C(F)C(F)C(F)C(F)C(F)C(F)C(F)C(F)C(F)C(F)C(F)C(F)C(F)C(F)C(F)C(F)C(F)C(F)C(F)C(F)C(F)C(F)C(F)C(F)C(F)C(F)C(F)C(F)C(F)C(F)C(F)C(F)C(F)C(F)C(F)C(F)C(F)C(F)C(F)C(F)C(F)C(F)C(F)C(F)C(F)C(F)C(F)C(F)C(F)C(F)C(F)C(F)C(F)C(F)C(F)C(F)C(F)C(F)C(F)C(F)C(F)C(F)C(F)C(F)C(F)C(F)C(F)C(F)C(F)C(F)C(F)C(F)C(F)C(F)C(F)C(F)C(F)C(F)C(F)C(F)C(F)C(F)C(F)C(F)C(F)C(F)C(F)C(F)C(F)C(F)C(F)C(F)C(F)C(F)C(F)C(F)C(F)C(F)C(F)C(F)C(F)C(F)C(F)C(F)C(F)C(F)C(F)C(F)C(F)C |        |       |      |   |     |

[illegible]

|                                                                                                                                                                                                                                                                                                 |       |       |      |     |     |
|-------------------------------------------------------------------------------------------------------------------------------------------------------------------------------------------------------------------------------------------------------------------------------------------------|-------|-------|------|-----|-----|
| 1<br>2<br>3<br>4<br>5<br>6<br>7<br>8<br>9<br>10<br>11<br>12<br>13<br>14<br>15<br>16<br>17<br>18<br>19<br>20<br>21<br>22<br>23<br>24<br>25<br>26<br>27<br>28<br>29<br>30<br>31<br>32<br>33<br>34<br>35<br>36<br>37<br>38<br>39<br>40<br>41<br>42<br>43<br>44<br>45<br>46<br>47<br>48<br>49<br>50 | -6.64 | 20.00 | 2.51 | P   | OUT |
|                                                                                                                                                                                                                                                                                                 | -6.95 | 37.50 | 2.18 | P   | IN  |
|                                                                                                                                                                                                                                                                                                 | -6.74 | 31.03 | 2.26 | P   | OUT |
|                                                                                                                                                                                                                                                                                                 | -7.08 | 37.50 | 2.24 | P   | IN  |
|                                                                                                                                                                                                                                                                                                 | -6.92 | 28.13 | 2.42 | P   | OUT |
|                                                                                                                                                                                                                                                                                                 | -6.87 | 33.33 | 2.26 | P   | IN  |
|                                                                                                                                                                                                                                                                                                 | -6.87 | 33.33 | 2.26 | P   | IN  |
|                                                                                                                                                                                                                                                                                                 | -7.38 | 34.62 | 2.45 | P   | IN  |
|                                                                                                                                                                                                                                                                                                 | -7.27 | 32.14 | 2.47 | P   | OUT |
|                                                                                                                                                                                                                                                                                                 | -7.49 | 36.00 | 2.47 | P   | IN  |
|                                                                                                                                                                                                                                                                                                 | -6.65 | 33.33 | 2.16 | P   | IN  |
|                                                                                                                                                                                                                                                                                                 | -6.26 | 36.00 | 1.91 | P   | IN  |
|                                                                                                                                                                                                                                                                                                 | -6.65 | 42.86 | 1.91 | P   | IN  |
|                                                                                                                                                                                                                                                                                                 | -6.77 | 32.14 | 2.24 | P   | OUT |
|                                                                                                                                                                                                                                                                                                 | -6.69 | 47.37 | 1.81 | P   | IN  |
|                                                                                                                                                                                                                                                                                                 | -7.15 | 40.91 | 2.18 | P   | IN  |
|                                                                                                                                                                                                                                                                                                 | -6.84 | 33.33 | 2.24 | P   | IN  |
|                                                                                                                                                                                                                                                                                                 | -6.80 | 32.14 | 2.26 | P   | OUT |
|                                                                                                                                                                                                                                                                                                 | -7.27 | 29.03 | 2.55 | P   | OUT |
|                                                                                                                                                                                                                                                                                                 | -6.56 | 22.50 | 2.40 | P   | OUT |
|                                                                                                                                                                                                                                                                                                 | -7.21 | 52.63 | 1.90 | P   | IN  |
|                                                                                                                                                                                                                                                                                                 | -8.12 | 45.45 | 2.51 | P   | IN  |
|                                                                                                                                                                                                                                                                                                 | -8.05 | 43.75 | 2.52 | P   | IN  |
|                                                                                                                                                                                                                                                                                                 | -8.00 | 53.85 | 2.23 | P   | IN  |
|                                                                                                                                                                                                                                                                                                 | -7.59 | 46.15 | 2.25 | P   | IN  |
|                                                                                                                                                                                                                                                                                                 | -7.63 | 41.38 | 2.39 | P   | IN  |
|                                                                                                                                                                                                                                                                                                 | -6.82 | 23.81 | 2.49 | P   | OUT |
|                                                                                                                                                                                                                                                                                                 | -9.98 | 61.36 | 2.94 | P   | OUT |
|                                                                                                                                                                                                                                                                                                 | -8.87 | 59.38 | 2.49 | P   | IN  |
|                                                                                                                                                                                                                                                                                                 | -6.91 | 27.78 | 2.42 | P   | OUT |
|                                                                                                                                                                                                                                                                                                 | -8.95 | 48.78 | 2.80 | P   | IN  |
|                                                                                                                                                                                                                                                                                                 | -8.87 | 45.45 | 2.85 | P   | IN  |
|                                                                                                                                                                                                                                                                                                 | -8.93 | 42.55 | 2.96 | P   | IN  |
|                                                                                                                                                                                                                                                                                                 | -8.89 | 40.00 | 3.00 | P   | IN  |
|                                                                                                                                                                                                                                                                                                 | -6.82 | 36.00 | 2.17 | P   | IN  |
|                                                                                                                                                                                                                                                                                                 | -7.41 | 42.31 | 2.27 | P   | IN  |
|                                                                                                                                                                                                                                                                                                 | -8.77 | 47.46 | 2.75 | P   | IN  |
|                                                                                                                                                                                                                                                                                                 | -8.43 | 39.13 | 2.82 | P   | IN  |
|                                                                                                                                                                                                                                                                                                 | -8.49 | 40.91 | 2.80 | P   | IN  |
|                                                                                                                                                                                                                                                                                                 | -8.63 | 45.76 | 2.73 | P   | IN  |
|                                                                                                                                                                                                                                                                                                 | -6.65 | 42.86 | 1.91 | P   | IN  |
|                                                                                                                                                                                                                                                                                                 | -7.14 | 29.03 | 2.49 | P   | OUT |
|                                                                                                                                                                                                                                                                                                 | -6.53 | 40.91 | 1.90 | P   | IN  |
|                                                                                                                                                                                                                                                                                                 | -7.03 | 36.00 | 2.26 | P   | IN  |
|                                                                                                                                                                                                                                                                                                 | -7.06 | 50.00 | 1.91 | P   | IN  |
|                                                                                                                                                                                                                                                                                                 | -6.94 | 27.27 | 2.45 | P   | OUT |
|                                                                                                                                                                                                                                                                                                 | -9.84 | 59.09 | 2.93 | P   | OUT |
|                                                                                                                                                                                                                                                                                                 | -8.61 | 56.25 | 2.45 | P   | IN  |
|                                                                                                                                                                                                                                                                                                 | -7.23 | 33.33 | 2.42 | P   | OUT |
|                                                                                                                                                                                                                                                                                                 | -7.30 | 42.86 | 2.21 | P   | IN  |
| -7.71                                                                                                                                                                                                                                                                                           | 19.15 | 3.02  | P    | OUT |     |
| -7.22                                                                                                                                                                                                                                                                                           | 38.46 | 2.28  | P    | IN  |     |
| -7.33                                                                                                                                                                                                                                                                                           | 31.25 | 2.52  | P    | OUT |     |
| -8.52                                                                                                                                                                                                                                                                                           | 40.91 | 2.81  | P    | IN  |     |
| -8.58                                                                                                                                                                                                                                                                                           | 36.00 | 2.97  | P    | OUT |     |
| -7.88                                                                                                                                                                                                                                                                                           | 21.74 | 3.02  | P    | OUT |     |





|         |                                                                                                                                                                 |              |                                                                            |       |       |      |   |     |
|---------|-----------------------------------------------------------------------------------------------------------------------------------------------------------------|--------------|----------------------------------------------------------------------------|-------|-------|------|---|-----|
| QL03044 | N-Cyclooctyl-1,1,2,2,3,3,4,4,4-nonafluorobutane-1-sulfonamide<br>1,1,2,2,3,3,4,4,4-nonafluoro-N-[(trifluoromethyl)sulfonyl]-1-Butanesulfonamide                 | 1456900-48-3 | FC(F)(F)C(F)(F)C(F)(F)C(F)(F)S(=O)(=O)NC1CCCCCCC1                          | -6.81 | 21.95 | 2.53 | P | OUT |
| QL03045 | Butanesulfonamide                                                                                                                                               | 39847-37-5   | FC(F)(F)C(F)(F)C(F)(F)C(F)(F)S(=O)(=O)NS(=O)(=O)C(F)(F)F                   | -7.66 | 48.00 | 2.23 | P | IN  |
| QL03046 | Vinyl nonafluoro-1-butanedisulfonate                                                                                                                            | 42409-05-2   | FC(F)(F)C(F)(F)C(F)(F)C(F)(F)S(=O)(=O)OC=C                                 | -7.11 | 40.91 | 2.17 | P | IN  |
| QL03047 | Phenyl nonafluorobutane-1-sulfonate                                                                                                                             | 25628-11-9   | FC(F)(F)C(F)(F)C(F)(F)C(F)(F)S(=O)(=O)OC1=CC=CC=C1                         | -7.27 | 32.14 | 2.47 | P | OUT |
| QL03048 | Cyclopent-1-en-1-yl nonafluorobutane-1-sulfonate                                                                                                                | 36839-94-8   | FC(F)(F)C(F)(F)C(F)(F)C(F)(F)S(=O)(=O)OC1=CCCC1                            | -6.71 | 31.03 | 2.24 | P | OUT |
| QL03049 | Cyclohex-1-en-1-yl nonafluorobutane-1-sulfonate                                                                                                                 | 36839-95-9   | FC(F)(F)C(F)(F)C(F)(F)C(F)(F)S(=O)(=O)OC1=CCCCC1                           | -7.03 | 28.13 | 2.47 | P | OUT |
| QL03050 | Cyclohept-1-en-1-yl nonafluorobutane-1-sulfonate                                                                                                                | 42108-79-2   | FC(F)(F)C(F)(F)C(F)(F)C(F)(F)S(=O)(=O)OC1=CCCCCC1                          | -6.89 | 25.71 | 2.47 | P | OUT |
| QL03051 | 4-Cyanophenyl nonafluorobutane-1-sulfonate                                                                                                                      | 626201-15-8  | FC(F)(F)C(F)(F)C(F)(F)C(F)(F)S(=O)(=O)OC1ccc(cc1)C#N                       | -7.65 | 31.03 | 2.68 | P | OUT |
| QL03052 | 2,4-Dichlorophenyl nonafluorobutane-1-sulfonate                                                                                                                 | 32848-21-8   | FC(F)(F)C(F)(F)C(F)(F)C(F)(F)S(=O)(=O)Oc1ccc(cc1)Cl                        | -7.79 | 39.29 | 2.52 | P | IN  |
| QL03053 | Quinolin-8-yl nonafluorobutane-1-sulfonate                                                                                                                      | 41605-60-1   | FC(F)(F)C(F)(F)C(F)(F)C(F)(F)S(=O)(=O)Oc1cccc2ccncc12                      | -7.07 | 27.27 | 2.51 | P | OUT |
| QL03054 | 2-Cyanophenyl nonafluorobutane-1-sulfonate                                                                                                                      | 873838-37-0  | FC(F)(F)C(F)(F)C(F)(F)C(F)(F)S(=O)(=O)Oc1cccc1C#N                          | -7.17 | 31.03 | 2.45 | P | OUT |
| QL03055 | 1,2-Ethanediy bis(perfluorobutanesulfonate)<br>2-[(1,1,2,2,3,3,4,4,4-Nonafluorobutane-1-sulfonyl)oxy]-3a,4,7,7a-tetrahydro-1H-4,7-methanoisindole-1,3(2H)-dione | 92982-03-1   | FC(F)(F)C(F)(F)C(F)(F)C(F)(F)S(=O)(=O)OC(COS(=O)(=O)C(F)(F)C(F)(F)C(F)(F)F | -8.84 | 45.00 | 2.85 | P | IN  |
| QL03056 | 1,1,2,2,3,3,4,4,4-nonafluoro-N-(2-hydroxyethyl)-1-Butanesulfonamide                                                                                             | 307531-76-6  | FC(F)(F)C(F)(F)C(F)(F)C(F)(F)S(=O)(=O)ON1C(=O)C2C3CC(C=C3)C2C1=O           | -6.88 | 24.32 | 2.50 | P | OUT |
| QL03057 | Butanesulfonamide                                                                                                                                               | 34454-99-4   | FC(F)(F)C(F)(F)C(F)(F)C(F)(F)S(=O)(=O)NCCO=O                               | -6.92 | 34.62 | 2.25 | P | IN  |
| QL03058 | [1-(1,1,2,2,3,3,4,4,4-Nonafluorobutane-1-sulfinyl)ethenyl]benzene                                                                                               | 1606997-41-4 | FC(F)(F)C(F)(F)C(F)(F)C(F)(F)S(=O)C(=C)C1CCCC1                             | -7.11 | 30.00 | 2.45 | P | OUT |
| QL03059 | Perfluoro-1-butanedisulfonyl chloride                                                                                                                           | 2991-84-6    | FC(F)(F)C(F)(F)C(F)(F)C(F)(F)S(=O)(=O)Cl                                   | -7.32 | 58.82 | 1.79 | P | IN  |
| QL03060 | Perfluorobutanesulfinyl chloride                                                                                                                                | 41006-41-1   | FC(F)(F)C(F)(F)C(F)(F)C(F)(F)S(=O)Cl                                       | -7.56 | 62.50 | 1.81 | P | IN  |
| QL03061 | Perfluorobutane sulfonamidoacetic acid                                                                                                                          | 347872-22-4  | FC(F)(F)C(F)(F)C(F)(F)C(F)(F)S(=O)(=O)CC(=O)O                              | -6.99 | 36.00 | 2.24 | P | IN  |
| QL03062 | Perfluoroalkyl (linear) sulfinate, n=4                                                                                                                          | 34642-43-8   | FC(F)(F)C(F)(F)C(F)(F)C(F)(F)S(=O)=O                                       | -7.01 | 52.94 | 1.81 | P | IN  |
| QL03063 | [(Nonafluorobutyl)disulfonyl]benzene                                                                                                                            | 1606997-42-5 | FC(F)(F)C(F)(F)C(F)(F)C(F)(F)S(=O)(=O)S(=O)(=O)C1=CC=CC=C1                 | -7.32 | 34.62 | 2.43 | P | IN  |
| QL03064 | 1,1,1,2,2,3,3,4,5,5-Undecafluoro-4-iodopentane                                                                                                                  | 68158-13-4   | FC(F)(F)C(F)(F)C(F)(F)C(F)(F)I                                             | -8.00 | 70.59 | 1.79 | P | OUT |
| QL03065 | 1,1,1,2,2,3,3,6,6,7,7,8,8,9,10,10,11,11-icosafuoroundec-4-ene                                                                                                   | 102780-88-1  | FC(F)(F)C(F)(F)C(F)(F)C(F)(F)C(F)(F)C(F)(F)C(F)(F)F                        | -7.81 | 70.00 | 1.72 | P | OUT |
| QL03066 | 1-ethoxy-2,2,3,3,4,4,4-heptafluorobutan-1-ol                                                                                                                    | 356-26-3     | FC(F)(F)C(F)(F)C(F)(F)C(F)(F)C(F)(F)CO                                     | -6.07 | 31.82 | 1.93 | P | OUT |
| QL03067 | 2,2,3,3,4,4,4-Heptafluoro-1-phenylbutyl diphenyl phosphate                                                                                                      | 98010-21-0   | FC(F)(F)C(F)(F)C(F)(F)C(F)(F)C(F)(F)C(=O)OC1=CC=CC=C1                      | -6.12 | 14.00 | 2.42 | P | OUT |
| QL03068 | 3,3,4,4,5,5,5-heptafluoropent-1-yne                                                                                                                             | 80337-25-3   | FC(F)(F)C(F)(F)C(F)(F)C(F)(F)C#C                                           | -6.01 | 53.85 | 1.46 | P | IN  |
| QL03069 | 4,4,5,5,6,6,6-Heptafluoro-1-phenylhex-2-yn-1-one                                                                                                                | 89965-72-0   | FC(F)(F)C(F)(F)C(F)(F)C#CC(=O)C1=CC=CC=C1                                  | -6.92 | 28.00 | 2.42 | P | OUT |
| QL03070 | (3,3,4,4,5,5,5-Heptafluoropent-1-yn-1-yl)benzene                                                                                                                | 81674-08-0   | FC(F)(F)C(F)(F)C(F)(F)C#CC1=CC=CC=C1                                       | -6.60 | 30.43 | 2.21 | P | OUT |
| QL03071 | Heptafluorobutyronitrile                                                                                                                                        | 375-00-8     | FC(F)(F)C(F)(F)C(F)(F)C#N                                                  | -6.57 | 58.33 | 1.46 | P | IN  |
| QL03072 | 3,3,4,4,5,5,5-heptafluoropent-1-ene                                                                                                                             | 355-08-8     | FC(F)(F)C(F)(F)C(F)(F)C=C                                                  | -5.89 | 46.67 | 1.46 | P | IN  |
| QL03073 | 3-(2,2,3,3,4,4,4-Heptafluorobutylidene)oxolan-2-one                                                                                                             | 89608-45-7   | FC(F)(F)C(F)(F)C(F)(F)C=C1CCCC1=O                                          | -6.01 | 31.82 | 1.90 | P | OUT |
| QL03074 | 4,4,5,5,6,6,6-Heptafluoro-1-phenylhex-2-en-1-one                                                                                                                | 110960-47-9  | FC(F)(F)C(F)(F)C(F)(F)C(=O)C1=CC=CC=C1                                     | -6.80 | 25.93 | 2.42 | P | OUT |
| QL03075 | 1,1,1,2,2,3,3,6,6,7,7,8,8,9,10,10,11,11-icosafuoroundec-4-ene                                                                                                   | 100603-63-2  | FC(F)(F)C(F)(F)C(F)(F)C=C(F)(F)C(F)(F)C(F)(F)C(F)(F)C(F)(F)F               | -9.37 | 60.61 | 2.68 | P | OUT |
| QL03076 | 1,1,1,2,2,3,3,6,6,7,7,8,8,9,10,10,10-Octadecafluorodec-4-ene                                                                                                    | 935477-16-0  | FC(F)(F)C(F)(F)C(F)(F)C=C(F)(F)C(F)(F)C(F)(F)C(F)(F)C(F)(F)F               | -8.95 | 60.00 | 2.50 | P | IN  |
| QL03077 | 1,1,1,2,2,3,3,6,6,7,7,8,8,9,9,9-Hexadecafluoronon-4-ene                                                                                                         | 935477-07-9  | FC(F)(F)C(F)(F)C(F)(F)C=C(F)(F)C(F)(F)C(F)(F)C(F)(F)F                      | -8.64 | 59.26 | 2.38 | P | IN  |
| QL03078 | 1,1,1,2,2,3,3,6,6,7,7,8,8,8-Tetradecafluorooct-4-ene                                                                                                            | 3910-82-5    | FC(F)(F)C(F)(F)C(F)(F)C=C(F)(F)C(F)(F)C(F)(F)F                             | -8.11 | 58.33 | 2.16 | P | IN  |
| QL03080 | 3,3,4,4,5,5,5-Heptafluoro-1-iodo-1-pentene                                                                                                                      | 376-97-6     | FC(F)(F)C(F)(F)C(F)(F)C=C1                                                 | -7.14 | 53.33 | 1.85 | P | IN  |
| QL03082 | (1E)-2,2,3,3,4,4,4-Heptafluoro-N-phenylbutan-1-imine                                                                                                            | 62765-24-6   | FC(F)(F)C(F)(F)C(F)(F)C=CNC1=CC=CC=C1                                      | -6.53 | 29.17 | 2.21 | P | OUT |
| QL03083 | (1E)-2,2,3,3,4,4,4-Heptafluoro-N-(2-phenylethyl)butan-1-imine                                                                                                   | 29723-32-8   | FC(F)(F)C(F)(F)C(F)(F)C=CNC1=CC=CC=C1                                      | -6.74 | 23.33 | 2.46 | P | OUT |
| QL03084 | Perfluorobutyraldehyde                                                                                                                                          | 375-02-0     | FC(F)(F)C(F)(F)C(F)(F)C=O                                                  | -6.31 | 53.85 | 1.46 | P | IN  |
| QL03085 | Undecafluoro(heptafluoropropyl)cyclohexane                                                                                                                      | 374-59-4     | FC(F)(F)C(F)(F)C(F)(F)C1(F)C(F)(F)C(F)(F)C(F)(F)C1(F)F                     | -8.41 | 66.67 | 2.08 | P | OUT |
| QL03086 | 2,2,3,3,4,4,5,6,6-Nonafluoro-5-(heptafluoropropyl)oxane                                                                                                         | 801-26-3     | FC(F)(F)C(F)(F)C(F)(F)C1(F)C(F)(F)OC(F)(F)C(F)(F)C1(F)F                    | -8.29 | 64.00 | 2.10 | P | IN  |
| QL03087 | 3,4,4-Trifluoro-3-(heptafluoropropyl)-1,2,lambda-6"-oxathietane-2,2-dione                                                                                       | 156465-44-0  | FC(F)(F)C(F)(F)C(F)(F)C1(F)C(F)(F)OS1(=O)=O                                | -6.87 | 52.63 | 1.75 | P | IN  |
| QL03088 | 2,2,3,3,4,4,5,5,6-Nonafluoro-6-(heptafluoropropyl)tetrahydro-2H-pyran                                                                                           | 335-35-3     | FC(F)(F)C(F)(F)C(F)(F)C1(F)OC(F)(F)C(F)(F)C(F)(F)C1(F)F                    | -8.33 | 64.00 | 2.11 | P | IN  |
| QL03089 | 2,2,3,3,4,4,5-Heptafluoro-5-(heptafluoropropyl)oxolane                                                                                                          | 423-22-3     | FC(F)(F)C(F)(F)C(F)(F)C1(F)OC(F)(F)C(F)(F)C1(F)F                           | -7.79 | 63.64 | 1.88 | P | IN  |
| QL03090 | 2,2,3-Trifluoro-3-(heptafluoropropyl)oxirane                                                                                                                    | 74942-19-1   | FC(F)(F)C(F)(F)C(F)(F)C1(F)OC1(F)F                                         | -7.56 | 62.50 | 1.81 | P | IN  |
| QL03091 | 1,4-Bis(chloromethyl)-2-(heptafluoropropyl)benzene                                                                                                              | 139263-35-7  | FC(F)(F)C(F)(F)C(F)(F)C1=C(CCl)C=CC(CCl)=C1                                | -6.60 | 33.33 | 2.13 | P | IN  |
| QL03092 | 5-(Heptafluoropropyl)-3-phenyl-1H-pyrazole                                                                                                                      | 54864-78-7   | FC(F)(F)C(F)(F)C(F)(F)C1=CC(=NN1)C=CC=CC=C1                                | -6.76 | 25.00 | 2.43 | P | OUT |
| QL03093 | 6-(Heptafluoropropyl)-2-sulfonylidene-2,3-dihydropyrimidin-4(1H)-one                                                                                            | 88191-88-2   | FC(F)(F)C(F)(F)C(F)(F)C1=CC(=O)NC(=S)N1                                    | -6.10 | 33.33 | 1.91 | P | IN  |
| QL03094 | 1-Bromo-3-(heptafluoropropyl)benzene                                                                                                                            | 53104-06-6   | FC(F)(F)C(F)(F)C(F)(F)C1=CC(Br)=CC=C1                                      | -6.41 | 38.10 | 1.92 | P | IN  |
| QL03095 | 2-[(4-(heptafluoropropyl)phenyl)methyl]oxirane                                                                                                                  | 144006-68-8  | FC(F)(F)C(F)(F)C(F)(F)C1=CC=C(C2C2OC2)C=C1                                 | -6.88 | 24.14 | 2.50 | P | OUT |
| QL03096 | N-[6-(heptafluoropropyl)-2-oxo-2H-pyran-3-yl]benzamide                                                                                                          | 860454-18-8  | FC(F)(F)C(F)(F)C(F)(F)C1=CC=C(NC(=O)c2ccccc2)C(=O)O1                       | -7.21 | 20.59 | 2.75 | P | OUT |
| QL03097 | Quinoline, 4-(heptafluoropropyl)-                                                                                                                               | 181059-73-4  | FC(F)(F)C(F)(F)C(F)(F)C1=CC=NC2=CC=CC=C2N1                                 | -6.23 | 26.92 | 2.13 | P | OUT |
| QL03098 | AC1LC6EI                                                                                                                                                        | 60007-37-6   | FC(F)(F)C(F)(F)C(F)(F)C1=CN(C=O)NC1=O                                      | -6.64 | 33.33 | 2.16 | P | IN  |
| QL03099 | 5-(Heptafluoropropyl)-2-sulfonylidene-2,3-dihydropyrimidin-4(1H)-one                                                                                            | 145663-11-2  | FC(F)(F)C(F)(F)C(F)(F)C1=CN(C(=S)NC1=O                                     | -6.64 | 33.33 | 2.16 | P | IN  |
| QL03100 | (4S)-4-Benzyl-2-(heptafluoropropyl)-4,5-dihydro-1,3-oxazole                                                                                                     | 1366341-52-7 | FC(F)(F)C(F)(F)C(F)(F)C1=NC(=NC(=O)C2=CC=CC=C2)CO1                         | -6.78 | 21.88 | 2.52 | P | OUT |
| QL03101 | 2,4,6-Tris(heptafluoropropyl)-1,3,5-triazine                                                                                                                    | 915-76-4     | FC(F)(F)C(F)(F)C(F)(F)C1=NC(=NC(=N1)C(F)(F)C(F)(F)C(F)(F)C(F)(F)F          | -8.25 | 58.33 | 2.23 | P | IN  |
| QL03102 | MLS002694827                                                                                                                                                    | 4314-49-2    | FC(F)(F)C(F)(F)C(F)(F)C1=NC(=O)ON1                                         | -6.59 | 41.18 | 1.92 | P | IN  |
| QL03103 | Benzimidazole, 5(or 6)-chloro-2-(heptafluoropropyl)-                                                                                                            | 6866-58-6    | FC(F)(F)C(F)(F)C(F)(F)C1=NC2=C(N1)C=C(C)C=C2                               | -6.93 | 33.33 | 2.29 | P | IN  |
| QL03104 | 2-(Heptafluoropropyl)-1H-benzimidazole                                                                                                                          | 559-37-5     | FC(F)(F)C(F)(F)C(F)(F)C1=NC2=CC=CC=C2N1                                    | -6.42 | 29.17 | 2.16 | P | OUT |
| QL03105 | 2-(Perfluoropropyl)benzoxazole                                                                                                                                  | 2008-06-2    | FC(F)(F)C(F)(F)C(F)(F)C1=NC2=CC=CC=C2O1                                    | -6.50 | 30.43 | 2.16 | P | OUT |
| QL03106 | 4-(Heptafluoropropyl)-1,3-dihydro-2H-1,5-benzodiazepin-2-one                                                                                                    | 96146-10-0   | FC(F)(F)C(F)(F)C(F)(F)C1=NC2=CC=CC(=O)C1                                   | -6.30 | 24.14 | 2.24 | P | OUT |
| QL03107 | 2-(heptafluoropropyl)-4,5-dihydro-1H-imidazole                                                                                                                  | 4472-70-2    | FC(F)(F)C(F)(F)C(F)(F)C1=NCN1                                              | -6.02 | 35.00 | 1.83 | P | IN  |
| QL03108 | 2-(Heptafluoropropyl)-1-phenyl-4,5-dihydro-1H-imidazole                                                                                                         | 1069085-53-5 | FC(F)(F)C(F)(F)C(F)(F)C1=NCN1c1cccc1                                       | -6.29 | 23.33 | 2.26 | P | OUT |
| QL03109 | 1-Benzyl-2-(heptafluoropropyl)-4,5-dihydro-1H-imidazole                                                                                                         | 1069085-51-3 | FC(F)(F)C(F)(F)C(F)(F)C1=NCN1C1CCCC1                                       | -6.61 | 21.21 | 2.46 | P | OUT |

|         |                                                                           |              |                                                                       |       |       |      |   |     |
|---------|---------------------------------------------------------------------------|--------------|-----------------------------------------------------------------------|-------|-------|------|---|-----|
| QL03110 | 2-Perfluoropropyl-5-phenyl-1,3,4-oxadiazole                               | 5756-67-2    | FC(F)(F)C(F)(F)C(F)(F)C1=NN=C(C(=O)C1=CC=CC=C1                        | -6.88 | 26.92 | 2.43 | P | OUT |
| QL03111 | 5-(heptafluoropropyl)-1-phenyl-1h-tetrazole                               | 2712-85-8    | FC(F)(F)C(F)(F)C(F)(F)C1=NN=NNC1=CC=CC=C1                             | -6.50 | 26.92 | 2.26 | P | OUT |
| QL03112 | 4-Bromo-2-(heptafluoropropyl)pyridine                                     | 1816283-37-0 | FC(F)(F)C(F)(F)C(F)(F)C1cc(Br)ccn1                                    | -6.52 | 40.00 | 1.92 | P | IN  |
| QL03113 | 4-Chloro-2-(heptafluoropropyl)pyridine                                    | 1816283-32-5 | FC(F)(F)C(F)(F)C(F)(F)C1ccc(Cl)ccn1                                   | -6.52 | 40.00 | 1.92 | P | IN  |
| QL03114 | 1-Bromo-4-(heptafluoropropyl)benzene                                      | 117874-91-6  | FC(F)(F)C(F)(F)C(F)(F)C1cccc(Br)cc1                                   | -6.98 | 38.10 | 2.18 | P | IN  |
| QL03115 | 5-Bromo-2-(heptafluoropropyl)pyridine                                     | 1816282-96-8 | FC(F)(F)C(F)(F)C(F)(F)C1cccc(Br)cn1                                   | -7.09 | 40.00 | 2.18 | P | IN  |
| QL03116 | 1-(Heptafluoropropyl)-4-iodobenzene                                       | 1417885-93-8 | FC(F)(F)C(F)(F)C(F)(F)C1cccc(I)cc1                                    | -6.98 | 38.10 | 2.18 | P | IN  |
| QL03117 | N-[5-(Heptafluoropropyl)]1,1'-biphenyl]-2-yl]benzamide                    | 748785-00-4  | FC(F)(F)C(F)(F)C(F)(F)C1cccc(NC(=O)c2ccccc2)c(c1)-c1ccccc1            | -6.98 | 15.56 | 2.78 | P | OUT |
| QL03118 | 2-(Heptafluoropropyl)quinoline                                            | 57702-79-1   | FC(F)(F)C(F)(F)C(F)(F)C1cccc2ccccc2n1                                 | -6.56 | 26.92 | 2.29 | P | OUT |
| QL03119 | 5-(Heptafluoropropyl)isoquinoline-1-carbaldehyde                          | 31181-32-5   | FC(F)(F)C(F)(F)C(F)(F)C1cccc2c(C=O)nc2c1                              | -6.36 | 25.00 | 2.24 | P | OUT |
| QL03120 | (Heptafluoropropyl)benzene                                                | 378-98-3     | FC(F)(F)C(F)(F)C(F)(F)C1cccc1                                         | -6.14 | 33.33 | 1.92 | P | IN  |
| QL03121 | 2-(Heptafluoropropyl)cyclohexan-1-one                                     | 61282-91-5   | FC(F)(F)C(F)(F)C(F)(F)C1CCCCC1=O                                      | -5.72 | 26.92 | 1.90 | P | OUT |
| QL03122 | 1-(heptafluoropropyl)-2-iodocyclohexane                                   | 2728-75-8    | FC(F)(F)C(F)(F)C(F)(F)C1CCCCC1I                                       | -5.88 | 29.63 | 1.90 | P | OUT |
| QL03123 | 3-(Heptafluoropropyl)oxolane                                              | 143837-48-3  | FC(F)(F)C(F)(F)C(F)(F)C1CCOC1                                         | -5.84 | 31.82 | 1.83 | P | OUT |
| QL03124 | 5-(Heptafluoropropyl)dihydropyrimidine-2,4(1H,3H)-dione                   | 90715-84-7   | FC(F)(F)C(F)(F)C(F)(F)C1CNC(=O)NC1=O                                  | -6.48 | 30.43 | 2.16 | P | OUT |
| QL03125 | 5-(Heptafluoropropyl)pyrimidine                                           | 1354703-21-1 | FC(F)(F)C(F)(F)C(F)(F)C1ncnc1                                         | -6.34 | 36.84 | 1.92 | P | IN  |
| QL03126 | 2-(Heptafluoropropyl)oxirane                                              | 51035-20-2   | FC(F)(F)C(F)(F)C(F)(F)C1CO1                                           | -5.73 | 43.75 | 1.46 | P | IN  |
| QL03127 | 5-(Heptafluoropropyl)-1H-pyrrole-2-carbaldehyde                           | 123825-52-5  | FC(F)(F)C(F)(F)C(F)(F)C1Nc(C=O)cc1                                    | -6.71 | 33.33 | 2.18 | P | IN  |
| QL03128 | 4,6-Dichloro-2-(heptafluoropropyl)pyrimidine                              | 1023815-51-1 | FC(F)(F)C(F)(F)C(F)(F)C1nc(Cl)cc(Cl)n1                                | -6.91 | 47.37 | 1.91 | P | IN  |
| QL03129 | 2-(Heptafluoropropyl)-1H-indole                                           | 123825-50-3  | FC(F)(F)C(F)(F)C(F)(F)C1Nc2ccccc2c1                                   | -6.36 | 28.00 | 2.16 | P | OUT |
| QL03130 | 2-(Heptafluoropropyl)-3-phenylquinoxaline                                 | 69492-70-2   | FC(F)(F)C(F)(F)C(F)(F)C1nc2ccccc2nc1-c1ccccc1                         | -5.99 | 20.00 | 2.21 | P | OUT |
| QL03131 | 4-Chloro-2-(heptafluoropropyl)pyrimidine                                  | 937676-00-1  | FC(F)(F)C(F)(F)C(F)(F)C1nccc(Cl)n1                                    | -6.64 | 42.11 | 1.92 | P | IN  |
| QL03132 | 2-(Heptafluoropropyl)-1H-pyrrole                                          | 118425-75-5  | FC(F)(F)C(F)(F)C(F)(F)C1Nccc1                                         | -6.13 | 36.84 | 1.83 | P | IN  |
| QL03133 | 1-(Heptafluoropropyl)isoquinoline                                         | 70414-12-9   | FC(F)(F)C(F)(F)C(F)(F)C1nccc2ccccc12                                  | -6.23 | 26.92 | 2.13 | P | OUT |
| QL03134 | 2-(Heptafluoropropyl)pyrimidine                                           | 133391-64-7  | FC(F)(F)C(F)(F)C(F)(F)C1nccn1                                         | -6.34 | 36.84 | 1.92 | P | IN  |
| QL03135 | Imidazolidine, 2-heptafluoropropyl-                                       | 31185-53-2   | FC(F)(F)C(F)(F)C(F)(F)C1NCCN1                                         | -5.84 | 31.82 | 1.83 | P | OUT |
| QL03136 | 2-(Heptafluoropropyl)-1H-imidazole                                        | 81769-47-3   | FC(F)(F)C(F)(F)C(F)(F)C1Ncn1                                          | -6.24 | 38.89 | 1.83 | P | IN  |
| QL03138 | 4-Bromo-3-(heptafluoropropyl)-5-phenyl-1H-pyrazole                        | 82633-52-1   | FC(F)(F)C(F)(F)C(F)(F)C1Nc(c1Br)c1ccccc1                              | -6.95 | 28.57 | 2.42 | P | OUT |
| QL03139 | 5-(Heptafluoropropyl)-3-phenyl-1H-1,2,4-triazole                          | 2195-67-7    | FC(F)(F)C(F)(F)C(F)(F)C1Nnc(n1)-c1ccccc1                              | -6.82 | 25.93 | 2.43 | P | OUT |
| QL03140 | 3-(Heptafluoropropyl)-6-(morpholin-4-yl)[1,2,4]triazolo[4,3-b]pyridazine  | 296886-61-8  | FC(F)(F)C(F)(F)C(F)(F)C1nn2ccc(nn12)N1CCOCC1                          | -6.70 | 20.00 | 2.53 | P | OUT |
| QL03141 | 3-(Heptafluoropropyl)-1H-pyrazole                                         | 158148-63-1  | FC(F)(F)C(F)(F)C(F)(F)C1nNcc1                                         | -6.24 | 38.89 | 1.83 | P | IN  |
| QL03142 | 2(SH)-Furanone, 5-(heptafluoropropyl)-                                    | 143469-51-6  | FC(F)(F)C(F)(F)C(F)(F)C1OC(=O)C=C1                                    | -6.34 | 36.84 | 1.92 | P | IN  |
| QL03143 | 2-(Heptafluoropropyl)-1,3-dioxolane                                       | 109799-66-8  | FC(F)(F)C(F)(F)C(F)(F)C1OCCO1                                         | -6.02 | 35.00 | 1.83 | P | IN  |
| QL03144 | Allyl heptafluorobutylate                                                 | 17165-55-8   | FC(F)(F)C(F)(F)C(F)(F)C(C=C)OC=C                                      | -6.63 | 33.33 | 2.15 | P | IN  |
| QL03145 | 1,1,1,2,2,3,3,10,10,11,11,12,12,12-Tetradecafluoro-5,8-diiodododecane     | 2357-30-4    | FC(F)(F)C(F)(F)C(F)(F)CC(I)CCCC(I)CC(F)(F)C(F)(F)C(F)(F)F             | -8.23 | 42.11 | 2.65 | P | IN  |
| QL03146 | 1,1,1,2,2,3,3,11,11,12,12,13,13,13-Tetradecafluoro-5,9-diiodotridecane    | 1644-06-0    | FC(F)(F)C(F)(F)C(F)(F)CC(I)CCCC(I)CC(F)(F)C(F)(F)C(F)(F)F             | -8.32 | 39.02 | 2.77 | P | IN  |
| QL03147 | Trichloro(3,3,4,4,5,5,5-heptafluoropentyl)silane                          | 866-24-0     | FC(F)(F)C(F)(F)C(F)(F)CCl(Si)(Cl)(Cl)Cl                               | -7.06 | 50.00 | 1.91 | P | IN  |
| QL03148 | 3,3,4,4,5,5,5-heptafluoropentanal                                         | 126015-32-5  | FC(F)(F)C(F)(F)C(F)(F)C=O                                             | -6.59 | 43.75 | 1.85 | P | IN  |
| QL03149 | (2,2,3,3,4,4,4-Heptafluorobutyl)benzene                                   | 81664-99-5   | FC(F)(F)C(F)(F)C(F)(F)C(c1ccccc1)                                     | -6.36 | 29.17 | 2.13 | P | OUT |
| QL03150 | 1H,1H-Heptafluorobutyl epoxide                                            | 1765-92-0    | FC(F)(F)C(F)(F)C(F)(F)C1COC1                                          | -6.15 | 36.84 | 1.84 | P | IN  |
| QL03151 | 2-(2,2,3,3,4,4-Heptafluorobutyl)-1,3-dioxolane                            | 175607-87-1  | FC(F)(F)C(F)(F)C(F)(F)C(C1OCCO1)                                      | -6.95 | 30.43 | 1.92 | P | OUT |
| QL03152 | 5-Bromo-1,1,1,2,2,3,3-heptafluoropentane                                  | 355-94-2     | FC(F)(F)C(F)(F)C(F)(F)C(Br)C                                          | -6.78 | 47.06 | 1.85 | P | IN  |
| QL03153 | 1,1,1,2,2,3,3,4,4,5,5,6,6,9,9,10,10,11,11,11-Icosafluoroundecane          | 777931-73-4  | FC(F)(F)C(F)(F)C(F)(F)CCCC(F)(F)C(F)(F)C(F)(F)C(F)(F)C(F)(F)F         | -9.17 | 57.14 | 2.68 | P | IN  |
| QL03154 | 1,1,1,2,2,3,3,6,6,7,7,8,8,8-Tetradecafluorooctane                         | 1835251-92-7 | FC(F)(F)C(F)(F)C(F)(F)CCCC(F)(F)C(F)(F)C(F)(F)F                       | -7.85 | 53.85 | 2.16 | P | IN  |
| QL03155 | 7-Bromo-1,1,1,2,2,3,3-heptafluoroheptane                                  | 1391033-22-9 | FC(F)(F)C(F)(F)C(F)(F)C(Br)CCCC                                       | -6.77 | 34.78 | 2.17 | P | IN  |
| QL03156 | 1,1,1,2,2,3,3,10,10,11,11,12,12,12-Tetradecafluorododecane                | 69125-82-2   | FC(F)(F)C(F)(F)C(F)(F)CCCCCCC(F)(F)C(F)(F)C(F)(F)F                    | -7.83 | 36.84 | 2.60 | P | IN  |
| QL03157 | 1,1,1,2,2,3,3,12,12,13,13,14,14,14-Tetradecafluorotetradecane             | 1835251-91-6 | FC(F)(F)C(F)(F)C(F)(F)CCCCCCCCC(F)(F)C(F)(F)C(F)(F)F                  | -7.94 | 31.82 | 2.79 | P | OUT |
| QL03158 | 1,1,1,2,2,3,3,14,14,15,15,16,16,16-Tetradecafluorohexadecane              | 168169-26-4  | FC(F)(F)C(F)(F)C(F)(F)CCCCCCCCCCC(F)(F)C(F)(F)C(F)(F)F                | -8.09 | 28.00 | 2.96 | P | OUT |
| QL03159 | 1,1,1,2,2,3,3-Heptafluoro-7-iodoheptane                                   | 2967-60-4    | FC(F)(F)C(F)(F)C(F)(F)CCCCI                                           | -6.77 | 34.78 | 2.17 | P | IN  |
| QL03160 | 1,1,1,2,2,3,3-Heptafluoro-5-iodopentane                                   | 68188-12-5   | FC(F)(F)C(F)(F)C(F)(F)CCI                                             | -6.78 | 47.06 | 1.85 | P | IN  |
| QL03161 | 1,1,1,2,2,3,3-Heptafluoro-4-chlorobutane                                  | 374-97-0     | FC(F)(F)C(F)(F)C(F)(F)CCl                                             | -6.50 | 57.14 | 1.46 | P | IN  |
| QL03162 | Heptafluorobutyl iodide                                                   | 374-98-1     | FC(F)(F)C(F)(F)C(F)(F)CI                                              | -6.50 | 57.14 | 1.46 | P | IN  |
| QL03163 | 1-chloro-1,1,2,2,3,3,3-heptafluoropropane                                 | 422-86-6     | FC(F)(F)C(F)(F)C(F)(F)Cl                                              | -7.10 | 72.73 | 1.32 | P | OUT |
| QL03164 | N-Nitrosobis(2,2,3,3,4,4,4-heptafluorobutyl)amine                         | 83329-16-2   | FC(F)(F)C(F)(F)C(F)(F)CN(C(F)(F)C(F)(F)C(F)(F)F)N=O                   | -8.05 | 48.28 | 2.40 | P | IN  |
| QL03165 | Isocyanic acid, 2,2,3,3,4,4,4-heptafluorobutyl ester                      | 377-00-4     | FC(F)(F)C(F)(F)C(F)(F)C(F)(F)N=C=O                                    | -6.80 | 43.75 | 1.95 | P | IN  |
| QL03166 | N-(2,2,3,3,4,4,4-Heptafluorobutyl)prop-2-enamide                          | 1422-65-7    | FC(F)(F)C(F)(F)C(F)(F)C(F)(F)C(=O)C=C                                 | -6.54 | 31.82 | 2.15 | P | OUT |
| QL03167 | 3-Benzamido-N-(2,2,3,3,4,4,4-heptafluorobutyl)benzamide                   | 917920-92-4  | FC(F)(F)C(F)(F)C(F)(F)C(F)(F)C(=O)C1=CC(NC(=O)C2=CC=CC=C2)=CC=C1      | -6.37 | 16.67 | 2.93 | P | OUT |
| QL03168 | N-(2,2,3,3,4,4,4-Heptafluorobutyl)benzamide                               | 304458-19-3  | FC(F)(F)C(F)(F)C(F)(F)C(F)(F)C(=O)C1ccccc1                            | -6.75 | 25.00 | 2.42 | P | OUT |
| QL03169 | 2,2,3,3,4,4,4-Heptafluoro-N-(2,2,3,3,4,4,4-heptafluorobutyl)butan-1-amine | 356-08-1     | FC(F)(F)C(F)(F)C(F)(F)C(NCC(F)(F)C(F)(F)C(F)(F)F                      | -7.98 | 50.00 | 2.33 | P | IN  |
| QL03170 | Tris(1H,1H-heptafluorobutyl)phosphate                                     | 563-09-7     | FC(F)(F)C(F)(F)C(F)(F)COP(=O)(O)OC(F)(F)C(F)(F)C(F)(F)F               | -8.31 | 47.73 | 2.53 | P | IN  |
| QL03171 | Chlorotris(2,2,3,3,4,4,4-heptafluorobutoxy)silane                         | 757-72-2     | FC(F)(F)C(F)(F)C(F)(F)COP(Si)(Cl)(OCC(F)(F)C(F)(F)F)OCC(F)(F)C(F)(F)F | -8.44 | 50.00 | 2.53 | P | IN  |
| QL03172 | tris(Perfluoropropyl)methyl borate                                        | 755-53-3     | FC(F)(F)C(F)(F)C(F)(F)COB(OCC(F)(F)C(F)(F)F)OCC(F)(F)C(F)(F)F         | -8.32 | 48.84 | 2.51 | P | IN  |
| QL03173 | 2,2,3,3,4,4,4-Heptafluorobutyl 2-cyanoprop-2-enoate                       | 130192-28-8  | 130(F)(F)C(F)(F)C(F)(F)COC(=O)C=C#N                                   | -6.68 | 31.82 | 2.21 | P | OUT |
| QL03174 | 2,2,3,3,4,4,4-Heptafluorobutyl 2-chloroprop-2-enoate                      | 74359-14-1   | FC(F)(F)C(F)(F)C(F)(F)COC(=O)C(Cl)=C                                  | -6.87 | 38.10 | 2.13 | P | IN  |
| QL03175 | 2,2,3,3,4,4,4-Heptafluorobutyl heptafluorobutanoate                       | 308-45-2     | FC(F)(F)C(F)(F)C(F)(F)COC(=O)C(F)(F)C(F)(F)F                          | -8.29 | 53.85 | 2.36 | P | IN  |
| QL03176 | 1H,1H-Perfluorobutyl acrylate                                             | 424-64-6     | FC(F)(F)C(F)(F)C(F)(F)COC(=O)C=C                                      | -6.63 | 33.33 | 2.15 | P | IN  |
| QL03177 | Bis(1H,1H-perfluorobutyl)fumarate                                         | 24120-17-0   | FC(F)(F)C(F)(F)C(F)(F)COC(=O)C=CC(=O)OCC(F)(F)C(F)(F)C(F)(F)F         | -8.43 | 38.89 | 2.82 | P | IN  |
| QL03178 | 2,2,3,3,4,4,4-Heptafluorobutyl 1,2,3-benzothiadiazole-7-carboxylate       | 1384278-50-5 | FC(F)(F)C(F)(F)C(F)(F)COC(=O)c1cccc2nnc12                             | -6.65 | 25.00 | 2.38 | P | OUT |
| QL03179 | 2,2,3,3,4,4,4-Heptafluorobutyl but-3-enoate                               | 17165-56-9   | FC(F)(F)C(F)(F)C(F)(F)COC(=O)CC=C                                     | -6.56 | 29.17 | 2.23 | P | OUT |
| QL03180 | 1-Aziridinepropionic acid, 2,2,3,3,4,4,4-heptafluorobutyl ester           | 24160-20-1   | FC(F)(F)C(F)(F)C(F)(F)COC(=O)C1CN1CC1                                 | -6.74 | 24.14 | 2.44 | P | OUT |

|         |                                                                                                                   |              |                                                                                                                                      |        |       |      |   |     |
|---------|-------------------------------------------------------------------------------------------------------------------|--------------|--------------------------------------------------------------------------------------------------------------------------------------|--------|-------|------|---|-----|
| QL03181 | Bis(2,2,3,3,4,4,4-heptafluorobutyl) carbonate                                                                     | 1026739-75-2 | FC(F)(F)C(F)(F)C(F)(F)COC(=O)OC(F)(F)C(F)C(F)(F)F                                                                                    | -8.33  | 46.67 | 2.57 | P | IN  |
| QL03182 | 2,2,3,3,4,4,4-Heptafluorobutyl carbonochloridate                                                                  | 108156-21-4  | FC(F)(F)C(F)(F)C(F)(F)COC(Cl)=O                                                                                                      | -6.95  | 47.06 | 1.93 | P | IN  |
| QL03183 | 4-(Ethenyloxy)-1,1,1,2,2,3,3-heptafluorobutane                                                                    | 356-00-3     | FC(F)(F)C(F)(F)C(F)(F)COC=C                                                                                                          | -6.40  | 36.84 | 1.95 | P | IN  |
| QL03184 | 1-Ethenyl-4-(2,2,3,3,4,4,4-heptafluorobutoxy)benzene                                                              | 111144-99-1  | FC(F)(F)C(F)(F)C(F)(F)COC1=CC=C(C=C)C=C1                                                                                             | -6.97  | 24.14 | 2.55 | P | OUT |
| QL03185 | 2-[(4-(Perfluorobutoxy)pyridin-2-yl)methanesulfinyl]-1H-thieno[3,4-d]imidazole                                    | NOCAS_869668 | FC(F)(F)C(F)(F)C(F)(F)COC1=CC=NC(CS(=O)C2=NC3=CSC=C3N2)=C1                                                                           | -7.49  | 17.95 | 2.94 | P | OUT |
| QL03186 | 4-(2,2,3,3,4,4,4-Heptafluorobutoxy)benzaldehyde                                                                   | 943767-44-0  | FC(F)(F)C(F)(F)C(F)(F)COC1cccc(=O)cc1                                                                                                | -7.07  | 25.93 | 2.55 | P | OUT |
| QL03187 | 4-(2,2,3,3,4,4,4-Heptafluorobutoxy)benzonitrile                                                                   | 96308-32-6   | FC(F)(F)C(F)(F)C(F)(F)COC1cccc(c#N)C#N                                                                                               | -7.13  | 26.92 | 2.55 | P | OUT |
| QL03188 | 1,1,1,2,2,3,3-Heptafluoro-4-(2,2,3,3,4,4,4-heptafluorobutoxy)butane                                               | 647-91-6     | FC(F)(F)C(F)(F)C(F)(F)COC(F)(F)C(F)(F)C(F)F                                                                                          | -8.09  | 51.85 | 2.33 | P | IN  |
| QL03189 | Allyl 1H,1H-Heptafluorobutyl ether                                                                                | 648-42-0     | FC(F)(F)C(F)(F)C(F)(F)COC=C                                                                                                          | -6.60  | 31.82 | 2.17 | P | OUT |
| QL03190 | NSC221106                                                                                                         | 59727-25-2   | FC(F)(F)C(F)(F)C(F)(F)COCc1=CNC(=O)NC1=O                                                                                             | -6.86  | 25.00 | 2.47 | P | OUT |
| QL03191 | 2-[(2,2,3,3,4,4,4-Heptafluorobutoxy)methyl]oxirane                                                                | 648-43-1     | FC(F)(F)C(F)(F)C(F)(F)COCc1COC1                                                                                                      | -6.46  | 30.43 | 2.15 | P | OUT |
| QL03192 | 4-[(2,2,3,3,4,4,4-Heptafluorobutoxy)methyl]-1,3-dioxolan-2-one                                                    | 181044-06-4  | FC(F)(F)C(F)(F)C(F)(F)COCc1COC(=O)O1                                                                                                 | -6.80  | 26.92 | 2.39 | P | OUT |
| QL03193 | 4-(2-Chloroethoxy)-1,1,1,2,2,3,3-heptafluorobutane                                                                | 679-53-8     | FC(F)(F)C(F)(F)C(F)(F)COC(Cl)                                                                                                        | -6.96  | 38.10 | 2.17 | P | IN  |
| QL03194 | 2,2,3,3,4,4,4-Heptafluorobutyl diphenylphosphinate                                                                | 55776-72-2   | FC(F)(F)C(F)(F)C(F)(F)COP(=O)(c1ccccc1)c1ccccc1                                                                                      | -6.23  | 18.42 | 2.36 | P | OUT |
| QL03195 | Bis(2,2,3,3,4,4,4-heptafluorobutyl) phenylphosphonate                                                             | 31430-72-5   | FC(F)(F)C(F)(F)C(F)(F)COP(=O)(OC(F)(F)C(F)(F)C(F)(F)F)c1ccccc1                                                                       | -7.81  | 34.15 | 2.67 | P | OUT |
| QL03196 | bis(Perfluoropropyl)methyl phosphorochloridate                                                                    | 6780-81-0    | FC(F)(F)C(F)(F)C(F)(F)COP(Cl)=O)OC(F)(F)C(F)(F)C(F)(F)F                                                                              | -8.46  | 48.39 | 2.59 | P | IN  |
| QL03197 | 1,3,5,2,4,6-Triazatriphosphorine, 2,2,4,4,6,6-hexakis(2,2,3,3,4,4,4-heptafluorobutoxy)-2,2,4,4,6,6-hexahydro-     | 470-73-5     | FC(F)(F)C(F)(F)C(F)(F)COP1(OC(F)(F)C(F)(F)C(F)(F)F)=NP(OC(F)(F)C(F)(F)C(F)(F)F)(OC(F)(F)C(F)(F)C(F)(F)F)(OC(F)(F)C(F)(F)C(F)(F)F)=N1 | -8.33  | 46.67 | 2.57 | P | IN  |
| QL03198 | 1H,1H-Perfluorobutyl perfluorobutanesulfonate                                                                     | 883499-32-9  | FC(F)(F)C(F)(F)C(F)(F)COS(=O)(=O)C(F)(F)C(F)(F)C(F)(F)F                                                                              | -8.56  | 53.33 | 2.50 | P | IN  |
| QL03199 | 1H,1H-Heptafluorobutyl triflate                                                                                   | 6401-01-0    | FC(F)(F)C(F)(F)C(F)(F)COS(=O)(=O)C(F)(F)F                                                                                            | -7.33  | 47.62 | 2.09 | P | IN  |
| QL03200 | [(2,2,3,3,4,4,4-Heptafluorobutyl)sulfanyl]methylbenzene                                                           | 200337-06-0  | FC(F)(F)C(F)(F)C(F)(F)CSc1ccccc1                                                                                                     | -6.69  | 25.00 | 2.39 | P | OUT |
| QL03201 | Perflutren                                                                                                        | 76-19-7      | FC(F)(F)C(F)(F)C(F)(F)F                                                                                                              | -7.10  | 72.73 | 1.32 | P | OUT |
| QL03202 | Heptafluoropropyl iodide                                                                                          | 754-34-7     | FC(F)(F)C(F)(F)C(F)(F)I                                                                                                              | -7.10  | 72.73 | 1.32 | P | OUT |
| QL03203 | Perfluoro-N,N,N',N'-tetrakis(heptafluoropropyl)-1,6-hexanediamine                                                 | 143356-32-5  | FC(F)(F)C(F)(F)C(F)(F)N(C(F)(F)C(F)(F)C(F)(F)C(F)(F)C(F)(F)F)C(F)(F)C(F)(F)C(F)(F)F                                                  | -10.02 | 66.67 | 2.81 | P | OUT |
| QL03204 | Perfluamine                                                                                                       | 338-83-0     | N(C(F)(F)C(F)(F)C(F)(F)C(F)(F)C(F)(F)F)C(F)(F)C(F)(F)F                                                                               | -8.38  | 67.74 | 2.04 | P | OUT |
| QL03205 | 1,1,1,2,4,5,5,5-Octafluoro-2-(heptafluoropropoxy)-4-(trifluoromethyl)pentan-3-one                                 | 851535-00-7  | FC(F)(F)C(F)(F)C(F)(F)OC(F)(C(=O)C(F)(C(F)F)C(F)(F)C(F)(F)F                                                                          | -8.33  | 62.07 | 2.17 | P | IN  |
| QL03206 | 1,5-Dideoxy-1,1,1,5,5,5-hexafluoro-2,4-di-C-fluoro-2,4-bis-O-(heptafluoropropyl)pent-3-ulose                      | 67118-49-4   | FC(F)(F)C(F)(F)C(F)(F)OC(F)(C(=O)C(F)(OC(F)(F)C(F)(F)C(F)(F)F)C(F)(F)F)C(F)(F)F                                                      | -9.33  | 61.11 | 2.65 | P | IN  |
| QL03207 | 1,1,1,2,6,7,7,7-Octafluoro-2,6-bis(heptafluoropropoxy)heptane-3,5-dione                                           | 87405-74-1   | FC(F)(F)C(F)(F)C(F)(F)OC(F)(C(=O)CC(=O)C(F)(OC(F)(F)C(F)(F)C(F)(F)F)C(F)(F)F)C(F)(F)F                                                | -9.28  | 53.66 | 2.82 | P | IN  |
| QL03208 | 2,3,3,3-Tetrafluoro-2-(heptafluoropropoxy)-1-(piperidin-1-yl)propan-1-one                                         | 176702-72-0  | FC(F)(F)C(F)(F)C(F)(F)OC(F)(C(=O)N1CCCCC1)C(F)(F)F                                                                                   | -7.19  | 31.43 | 2.45 | P | OUT |
| QL03209 | 2,3,3,3-Tetrafluoro-2-(heptafluoropropoxy)-1-(morpholin-4-yl)propan-1-one                                         | 176702-73-1  | FC(F)(F)C(F)(F)C(F)(F)OC(F)(C(=O)N1CCOCC1)C(F)(F)F                                                                                   | -7.30  | 33.33 | 2.45 | P | OUT |
| QL03210 | N-Benzyl-2,3,3,3-tetrafluoro-2-(heptafluoropropoxy)propanamide                                                    | 82970-41-0   | FC(F)(F)C(F)(F)C(F)(F)OC(F)(C(=O)NCc1ccccc1)C(F)(F)F                                                                                 | -7.72  | 31.43 | 2.70 | P | OUT |
| QL03211 | Cyclohexyl 2,3,3,3-tetrafluoro-2-(heptafluoropropoxy)propanoate                                                   | 78755-41-6   | FC(F)(F)C(F)(F)C(F)(F)OC(F)(C(=O)OC1CCCCC1)C(F)(F)F                                                                                  | -7.26  | 29.73 | 2.53 | P | OUT |
| QL03212 | Phenyl 2,3,3,3-tetrafluoro-2-(heptafluoropropoxy)propanoate                                                       | 78755-31-4   | FC(F)(F)C(F)(F)C(F)(F)OC(F)(C(=O)Oc1ccccc1)C(F)(F)F                                                                                  | -7.59  | 35.48 | 2.53 | P | IN  |
| QL03213 | Prop-2-en-1-yl 2,3,3,3-tetrafluoro-2-(heptafluoropropoxy)propanoate                                               | 84123-65-9   | FC(F)(F)C(F)(F)C(F)(F)OC(F)(C(=O)OCC=C)C(F)(F)F                                                                                      | -7.65  | 39.29 | 2.46 | P | IN  |
| QL03214 | Benzyl 2,3,3,3-tetrafluoro-2-(heptafluoropropoxy)propanoate                                                       | 147224-19-9  | FC(F)(F)C(F)(F)C(F)(F)OC(F)(C(=O)OCC1CCCCC1)C(F)(F)F                                                                                 | -7.77  | 32.35 | 2.70 | P | OUT |
| QL03215 | bis(2,3,3,3-tetrafluoro-2-(heptafluoropropoxy)-1-oxopropyl)peroxide                                               | 56347-79-6   | FC(F)(F)C(F)(F)C(F)(F)OC(F)(C(=O)OOC(=O)C(F)(OC(F)(F)C(F)(F)C(F)(F)F)C(F)(F)C(F)(F)F                                                 | -9.47  | 55.00 | 2.87 | P | OUT |
| QL03216 | 2,3,3,3-Tetrafluoro-2-(heptafluoropropoxy)propanoyl chloride                                                      | 72848-57-8   | FC(F)(F)C(F)(F)C(F)(F)OC(F)(C(=O)C(F)(F)F                                                                                            | -7.51  | 60.00 | 1.85 | P | IN  |
| QL03217 | Tris(4-[1,1,2,3,3,3-hexafluoro-2-(heptafluoropropoxy)propyl]phenyl)phosphane                                      | 62512-90-7   | FC(F)(F)C(F)(F)C(F)(F)OC(F)(C(=O)OC1CCCCC1)C(F)(F)F                                                                                  | -9.88  | 42.86 | 3.38 | P | OUT |
| QL03218 | 1-([1-(1,2-Dibromo-1,2,2-trifluoroethoxy)-1,1,2,3,3,3-hexafluoropropan-2-yl]oxy)-1,1,2,2,3,3,3-heptafluoropropane | 115783-72-7  | FC(F)(F)C(F)(F)C(F)(F)OC(F)(C(F)(F)C(F)(F)OC(F)(Br)C(F)(F)Br                                                                         | -9.03  | 64.29 | 2.43 | P | IN  |
| QL03219 | 1-(4-Bromophenyl)-2,3,3,3-tetrafluoro-2-[1,1,2,3,3,3-hexafluoro-2-(heptafluoropropoxy)propoxy]propan-1-one        | 67727-74-6   | FC(F)(F)C(F)(F)C(F)(F)OC(F)(C(F)(F)C(F)(F)OC(F)(C(=O)C1=CC=C(Br)C=C1)C(F)(F)F                                                        | -8.77  | 45.00 | 2.82 | P | IN  |
| QL03220 | 2,3,3,3-Tetrafluoro-2-[1,1,2,3,3,3-hexafluoro-2-(heptafluoropropoxy)propoxy]-1-(piperidin-1-yl)propan-1-one       | 176702-75-3  | FC(F)(F)C(F)(F)C(F)(F)OC(F)(C(F)(F)C(F)(F)OC(F)(C(=O)N1CCCCC1)C(F)(F)F                                                               | -8.08  | 37.78 | 2.69 | P | IN  |
| QL03221 | 2,3,3,3-Tetrafluoro-2-[1,1,2,3,3,3-hexafluoro-2-(heptafluoropropoxy)propoxy]-1-(morpholin-4-yl)propan-1-one       | 176702-76-4  | FC(F)(F)C(F)(F)C(F)(F)OC(F)(C(F)(F)C(F)(F)OC(F)(C(=O)N1CCOCC1)C(F)(F)F                                                               | -8.18  | 39.53 | 2.69 | P | IN  |
| QL03222 | N-2-Pyridinylperfluoro-2-(2-propoxypropoxy)propanamide                                                            | 31339-60-3   | FC(F)(F)C(F)(F)C(F)(F)OC(F)(C(F)(F)C(F)(F)OC(F)(C(=O)NC1=CC=CC=N1)C(F)(F)F                                                           | -8.59  | 41.46 | 2.83 | P | IN  |
| QL03223 | N-2-Pyrimidinylperfluoro-2-(2-propoxypropoxy)propanamide                                                          | 340131-92-2  | FC(F)(F)C(F)(F)C(F)(F)OC(F)(C(F)(F)C(F)(F)OC(F)(C(=O)NC1=NC=CC=N1)C(F)(F)F                                                           | -8.65  | 42.50 | 2.83 | P | IN  |
| QL03224 | 2,3,3,3-Tetrafluoro-2-[1,1,2,3,3,3-hexafluoro-2-(heptafluoropropoxy)propoxy]-N-phenylpropanamide                  | 178167-74-3  | FC(F)(F)C(F)(F)C(F)(F)OC(F)(C(F)(F)C(F)(F)OC(F)(C(=O)Nc1ccccc1)C(F)(F)F                                                              | -8.53  | 40.48 | 2.83 | P | IN  |
| QL03225 | N-Allylperfluoro-2-(2-propoxypropoxy)propanamide                                                                  | 174080-50-3  | FC(F)(F)C(F)(F)C(F)(F)OC(F)(C(F)(F)C(F)(F)OC(F)(C(=O)NCC=C)C(F)(F)F                                                                  | -8.39  | 43.59 | 2.68 | P | IN  |
| QL03226 | Cyclohexyl 2,3,3,3-tetrafluoro-2-[1,1,2,3,3,3-hexafluoro-2-(heptafluoropropoxy)propoxy]propanoate                 | 145510-90-3  | FC(F)(F)C(F)(F)C(F)(F)OC(F)(C(F)(F)C(F)(F)OC(F)(C(=O)OC1CCCCC1)C(F)(F)F                                                              | -8.28  | 36.17 | 2.83 | P | OUT |
| QL03227 | Phenyl 2,3,3,3-tetrafluoro-2-[1,1,2,3,3,3-hexafluoro-2-(heptafluoropropoxy)propoxy]propanoate                     | 312943-34-3  | FC(F)(F)C(F)(F)C(F)(F)OC(F)(C(F)(F)C(F)(F)OC(F)(C(=O)Oc1ccccc1)C(F)(F)F                                                              | -8.59  | 41.46 | 2.83 | P | IN  |
| QL03228 | Prop-2-en-1-yl 2,3,3,3-tetrafluoro-2-[1,1,2,3,3,3-hexafluoro-2-(heptafluoropropoxy)propoxy]propanoate             | 117837-58-8  | FC(F)(F)C(F)(F)C(F)(F)OC(F)(C(F)(F)C(F)(F)OC(F)(C(=O)OCC=C)C(F)(F)F                                                                  | -8.45  | 44.74 | 2.68 | P | IN  |

|         |                                                                                                                                                                                                             |              |                                                                                                                                                                                                                          |        |       |      |   |     |
|---------|-------------------------------------------------------------------------------------------------------------------------------------------------------------------------------------------------------------|--------------|--------------------------------------------------------------------------------------------------------------------------------------------------------------------------------------------------------------------------|--------|-------|------|---|-----|
| QL03229 | Benzyl 2,3,3,3-tetrafluoro-2-[1,1,2,3,3,3-hexafluoro-2-(heptafluoropropoxy)propoxy]propanoate                                                                                                               | 140229-81-8  | FC(F)(F)C(F)(F)C(F)(F)OC(F)(C(F)(F)C(F)(F)OC(F)(C(=O)OCC1CCCC1)C(F)(F)F<br>FC(F)(F)C(F)(F)C(F)(F)OC(F)(C(F)(F)C(F)(F)OC(F)(C(F)(F)C(F)(F)OC(F)(C(F)(F)C(F)(F)OC(F)(F)C(F)(F)C(F)(F)F)                                    | -8.62  | 38.64 | 2.92 | P | OUT |
| QL03230 | perfluoro(5,6,9,12-tetramethyl-4,7,10,13-tetraoxahexadecane)<br>1,1,1,2,2,3,3,5,6,6,8,9,11,12,14,14,15,17,17,18,20,20,21,21,22,22-Octacosafuoro-18-hexakis(trifluoromethyl)-4,7,10,13,16,19-hexaoxadocosane | 61098-01-9   | FC(F)(F)C(F)(F)C(F)(F)OC(F)(C(F)(F)C(F)(F)OC(F)(C(F)(F)C(F)(F)OC(F)(C(F)(F)C(F)(F)OC(F)(F)C(F)(F)C(F)(F)F)<br>FC(F)(F)C(F)(F)C(F)(F)OC(F)(C(F)(F)C(F)(F)OC(F)(C(F)(F)C(F)(F)OC(F)(C(F)(F)C(F)(F)OC(F)(F)C(F)(F)C(F)(F)F) | -10.41 | 62.96 | 3.09 | P | OUT |
| QL03231 | perfluoro(5,8,9,12-tetramethyl-4,7,10,13-tetraoxahexadecane)<br>2-(1,2,2,2-Tetrafluoro-1-[1,1,2,3,3,3-hexafluoro-2-(heptafluoropropoxy)propoxy]ethyl)-1H-benzimidazole                                      | 76145-90-9   | FC(F)(F)C(F)(F)C(F)(F)OC(F)(C(F)(F)C(F)(F)OC(F)(C(F)(F)C(F)(F)OC(F)(C(F)(F)C(F)(F)OC(F)(F)C(F)(F)C(F)(F)F)<br>FC(F)(F)C(F)(F)C(F)(F)OC(F)(C(F)(F)C(F)(F)OC(F)(C(F)(F)C(F)(F)OC(F)(C(F)(F)C(F)(F)OC(F)(F)C(F)(F)C(F)(F)F) | -11.33 | 62.16 | 3.53 | P | OUT |
| QL03232 | perfluoro(5,8,9,12-tetramethyl-4,7,10,13-tetraoxahexadecane)<br>2-(1,2,2,2-Tetrafluoro-1-[1,1,2,3,3,3-hexafluoro-2-(heptafluoropropoxy)propoxy]ethyl)-1H-benzimidazole                                      | 76145-90-9   | FC(F)(F)C(F)(F)C(F)(F)OC(F)(C(F)(F)C(F)(F)OC(F)(C(F)(F)C(F)(F)OC(F)(C(F)(F)C(F)(F)OC(F)(F)C(F)(F)C(F)(F)F)<br>FC(F)(F)C(F)(F)C(F)(F)OC(F)(C(F)(F)C(F)(F)OC(F)(C(F)(F)C(F)(F)OC(F)(C(F)(F)C(F)(F)OC(F)(F)C(F)(F)C(F)(F)F) | -10.44 | 62.96 | 3.11 | P | OUT |
| QL03233 | perfluoro(5,8,9,12-tetramethyl-4,7,10,13-tetraoxahexadecane)<br>2-(1,2,2,2-Tetrafluoro-1-[1,1,2,3,3,3-hexafluoro-2-(heptafluoropropoxy)propoxy]ethyl)-1H-benzimidazole                                      | 76145-90-9   | FC(F)(F)C(F)(F)C(F)(F)OC(F)(C(F)(F)C(F)(F)OC(F)(C(F)(F)C(F)(F)OC(F)(C(F)(F)C(F)(F)OC(F)(F)C(F)(F)C(F)(F)F)<br>FC(F)(F)C(F)(F)C(F)(F)OC(F)(C(F)(F)C(F)(F)OC(F)(C(F)(F)C(F)(F)OC(F)(C(F)(F)C(F)(F)OC(F)(F)C(F)(F)C(F)(F)F) | -8.31  | 41.46 | 2.70 | P | IN  |
| QL03234 | Perfluoro-5,6-dimethyl-4,7-dioxadecane                                                                                                                                                                      | 17559-01-2   | FC(F)(F)C(F)(F)C(F)(F)OC(F)(C(F)(F)C(F)(F)OC(F)(C(F)(F)C(F)(F)OC(F)(C(F)(F)C(F)(F)OC(F)(F)C(F)(F)C(F)(F)F)<br>FC(F)(F)C(F)(F)C(F)(F)OC(F)(C(F)(F)C(F)(F)OC(F)(C(F)(F)C(F)(F)OC(F)(C(F)(F)C(F)(F)OC(F)(F)C(F)(F)C(F)(F)F) | -8.51  | 44.74 | 2.71 | P | IN  |
| QL03235 | Perfluoro-5,6-dimethyl-4,7-dioxadecane                                                                                                                                                                      | 2501-01-1    | FC(F)(F)C(F)(F)C(F)(F)OC(F)(C(F)(F)C(F)(F)OC(F)(C(F)(F)C(F)(F)OC(F)(C(F)(F)C(F)(F)OC(F)(F)C(F)(F)C(F)(F)F)<br>FC(F)(F)C(F)(F)C(F)(F)OC(F)(C(F)(F)C(F)(F)OC(F)(C(F)(F)C(F)(F)OC(F)(C(F)(F)C(F)(F)OC(F)(F)C(F)(F)C(F)(F)F) | -9.21  | 64.71 | 2.50 | P | IN  |
| QL03236 | Perfluoro-5,6-dimethyl-4,7-dioxadecane                                                                                                                                                                      | 1622868-66-9 | FC(F)(F)C(F)(F)C(F)(F)OC(F)(C(F)(F)C(F)(F)OC(F)(C(F)(F)C(F)(F)OC(F)(C(F)(F)C(F)(F)OC(F)(F)C(F)(F)C(F)(F)F)<br>FC(F)(F)C(F)(F)C(F)(F)OC(F)(C(F)(F)C(F)(F)OC(F)(C(F)(F)C(F)(F)OC(F)(C(F)(F)C(F)(F)OC(F)(F)C(F)(F)C(F)(F)F) | -8.05  | 50.00 | 2.36 | P | IN  |
| QL03237 | Perfluoro-5,6-dimethyl-4,7-dioxadecane                                                                                                                                                                      | 60308-66-9   | FC(F)(F)C(F)(F)C(F)(F)OC(F)(C(F)(F)C(F)(F)OC(F)(C(F)(F)C(F)(F)OC(F)(C(F)(F)C(F)(F)OC(F)(F)C(F)(F)C(F)(F)F)<br>FC(F)(F)C(F)(F)C(F)(F)OC(F)(C(F)(F)C(F)(F)OC(F)(C(F)(F)C(F)(F)OC(F)(C(F)(F)C(F)(F)OC(F)(F)C(F)(F)C(F)(F)F) | -7.44  | 57.89 | 1.87 | P | IN  |
| QL03238 | Perfluoro-5,6-dimethyl-4,7-dioxadecane                                                                                                                                                                      | 131628-34-7  | FC(F)(F)C(F)(F)C(F)(F)OC(F)(C(F)(F)C(F)(F)OC(F)(C(F)(F)C(F)(F)OC(F)(C(F)(F)C(F)(F)OC(F)(F)C(F)(F)C(F)(F)F)<br>FC(F)(F)C(F)(F)C(F)(F)OC(F)(C(F)(F)C(F)(F)OC(F)(C(F)(F)C(F)(F)OC(F)(C(F)(F)C(F)(F)OC(F)(F)C(F)(F)C(F)(F)F) | -6.99  | 50.00 | 1.87 | P | IN  |
| QL03239 | Perfluoro-5,6-dimethyl-4,7-dioxadecane                                                                                                                                                                      | 243128-38-3  | FC(F)(F)C(F)(F)C(F)(F)OC(F)(C(F)(F)C(F)(F)OC(F)(C(F)(F)C(F)(F)OC(F)(C(F)(F)C(F)(F)OC(F)(F)C(F)(F)C(F)(F)F)<br>FC(F)(F)C(F)(F)C(F)(F)OC(F)(C(F)(F)C(F)(F)OC(F)(C(F)(F)C(F)(F)OC(F)(C(F)(F)C(F)(F)OC(F)(F)C(F)(F)C(F)(F)F) | -7.41  | 50.00 | 2.06 | P | IN  |
| QL03240 | Perfluoro-5,6-dimethyl-4,7-dioxadecane                                                                                                                                                                      | 106372-30-9  | FC(F)(F)C(F)(F)C(F)(F)OC(F)(C(F)(F)C(F)(F)OC(F)(C(F)(F)C(F)(F)OC(F)(C(F)(F)C(F)(F)OC(F)(F)C(F)(F)C(F)(F)F)<br>FC(F)(F)C(F)(F)C(F)(F)OC(F)(C(F)(F)C(F)(F)OC(F)(C(F)(F)C(F)(F)OC(F)(C(F)(F)C(F)(F)OC(F)(F)C(F)(F)C(F)(F)F) | -7.99  | 66.67 | 1.89 | P | OUT |
| QL03241 | Perfluoro-5,6-dimethyl-4,7-dioxadecane                                                                                                                                                                      | 119511-16-9  | FC(F)(F)C(F)(F)C(F)(F)OC(F)(C(F)(F)C(F)(F)OC(F)(C(F)(F)C(F)(F)OC(F)(C(F)(F)C(F)(F)OC(F)(F)C(F)(F)C(F)(F)F)<br>FC(F)(F)C(F)(F)C(F)(F)OC(F)(C(F)(F)C(F)(F)OC(F)(C(F)(F)C(F)(F)OC(F)(C(F)(F)C(F)(F)OC(F)(F)C(F)(F)C(F)(F)F) | -7.62  | 37.93 | 2.48 | P | IN  |
| QL03242 | Perfluoro-5,6-dimethyl-4,7-dioxadecane                                                                                                                                                                      | 54572-17-7   | FC(F)(F)C(F)(F)C(F)(F)OC(F)(C(F)(F)C(F)(F)OC(F)(C(F)(F)C(F)(F)OC(F)(C(F)(F)C(F)(F)OC(F)(F)C(F)(F)C(F)(F)F)<br>FC(F)(F)C(F)(F)C(F)(F)OC(F)(C(F)(F)C(F)(F)OC(F)(C(F)(F)C(F)(F)OC(F)(C(F)(F)C(F)(F)OC(F)(F)C(F)(F)C(F)(F)F) | -9.47  | 62.96 | 2.66 | P | OUT |
| QL03243 | Perfluoro-5,6-dimethyl-4,7-dioxadecane                                                                                                                                                                      | 1152098-94-6 | FC(F)(F)C(F)(F)C(F)(F)OC(F)(C(F)(F)C(F)(F)OC(F)(C(F)(F)C(F)(F)OC(F)(C(F)(F)C(F)(F)OC(F)(F)C(F)(F)C(F)(F)F)<br>FC(F)(F)C(F)(F)C(F)(F)OC(F)(C(F)(F)C(F)(F)OC(F)(C(F)(F)C(F)(F)OC(F)(C(F)(F)C(F)(F)OC(F)(F)C(F)(F)C(F)(F)F) | -7.46  | 50.00 | 2.09 | P | IN  |
| QL03244 | Perfluoro-5,6-dimethyl-4,7-dioxadecane                                                                                                                                                                      | 54208-66-1   | FC(F)(F)C(F)(F)C(F)(F)OC(F)(C(F)(F)C(F)(F)OC(F)(C(F)(F)C(F)(F)OC(F)(C(F)(F)C(F)(F)OC(F)(F)C(F)(F)C(F)(F                                                                                                                  |        |       |      |   |     |

|         |                                                                                                                                                 |              |                                                                                                             |        |       |      |   |     |
|---------|-------------------------------------------------------------------------------------------------------------------------------------------------|--------------|-------------------------------------------------------------------------------------------------------------|--------|-------|------|---|-----|
| QL03279 | multiple ether-substituted Perfluoroalkyl (linear) sulfonic acids, n=4                                                                          |              | FC(F)(F)C(F)(F)OC(F)(F)C(F)(F)OC(F)(F)C(F)(F)C(F)(F)S(=O)(O)=O                                              | -8.83  | 53.13 | 2.63 | P | IN  |
| QL03280 | multiple ether-substituted Perfluoroalkyl (linear) sulfonic acids, n=3                                                                          |              | FC(F)(F)C(F)(F)OC(F)(F)C(F)(F)OC(F)(F)C(F)(F)C(F)(F)S(=O)(O)=O                                              | -8.47  | 51.72 | 2.50 | P | IN  |
| QL03281 | multiple ether-substituted Perfluoroalkyl (linear) sulfonic acids, n=2                                                                          |              | FC(F)(F)C(F)(F)OC(F)(F)C(F)(F)OC(F)(F)C(F)(F)S(=O)(O)=O                                                     | -8.24  | 50.00 | 2.44 | P | IN  |
| QL03282 | 1,1,2,2-Tetrafluoro-2-(pentafluoroethoxy)ethane-1-sulfonyl fluoride                                                                             | 67990-78-7   | FC(F)(F)C(F)(F)OC(F)(F)C(F)(F)S(F)(=O)=O                                                                    | -7.35  | 55.56 | 1.89 | P | IN  |
| QL03283 | 2-(2-Bromo-1,1,2,2-tetrafluoroethoxy)-1,1,1,2,3,3-hexafluoro-3-(pentafluoroethoxy)propane                                                       | 1482416-44-3 | FC(F)(F)C(F)(F)OC(F)(F)C(F)(F)OC(F)(F)C(F)(F)BrC(F)(F)F                                                     | -8.60  | 64.00 | 2.24 | P | IN  |
| QL03284 | 1,1,1,2,3,3-Hexafluoro-2,3-bis(pentafluoroethoxy)propane                                                                                        | 95842-03-8   | FC(F)(F)C(F)(F)OC(F)(F)C(F)(F)OC(F)(F)C(F)(F)F                                                              | -8.60  | 64.00 | 2.24 | P | IN  |
| QL03285 | 1,1,2,2-Tetrafluoro-2-[(1,1,1,2,3,3-hexafluoro-3-(pentafluoroethoxy)propan-2-yl)oxy]ethane-1-sulfonyl fluoride                                  | 27744-59-8   | FC(F)(F)C(F)(F)OC(F)(F)C(F)(F)OC(F)(F)C(F)(F)S(F)(=O)=O                                                     | -8.62  | 57.14 | 2.43 | P | IN  |
| QL03286 | 1-Bromo-1,1,2,2,4,5,5,7,8,8,10,11,11,13,13,14,14,14-octafluoro-4,7,10-tris(trifluoromethyl)-3,6,9,12-tetraoxatetradecane                        | 1482416-51-2 | FC(F)(F)C(F)(F)OC(F)(F)C(F)(F)OC(F)(F)C(F)(F)OC(F)(F)C(F)(F)OC(F)(F)C(F)(F)BrC(F)(F)C(F)(F)C(F)(F)F         | -9.99  | 62.22 | 2.92 | P | OUT |
| QL03287 | 1-Bromo-1,1,2,2,4,5,5,7,8,8,10,11,11,13,14,14,16,16,17,17,17-henicosafluoro-4,7,10,13-tetrakis(trifluoromethyl)-3,6,9,12,15-pentaaxaheptadecane | 1482416-52-3 | FC(F)(F)C(F)(F)OC(F)(F)C(F)(F)OC(F)(F)C(F)(F)OC(F)(F)C(F)(F)OC(F)(F)C(F)(F)OC(F)(F)C(F)(F)BrC(F)(F)C(F)(F)F | -10.49 | 61.82 | 3.16 | P | OUT |
| QL03288 | 1,2-Dichloro(perfluoro-1-(ethoxymethoxy)ethane)                                                                                                 | 369371-42-6  | FC(F)(F)C(F)(F)OC(F)(F)OC(F)(F)Cl                                                                           | -8.22  | 63.16 | 2.09 | P | IN  |
| QL03289 | 2,2,3,5,6-Pentafluoro-5-(pentafluoroethoxy)-3,6-bis(trifluoromethyl)-1,4-dioxane                                                                | 84041-66-7   | FC(F)(F)C(F)(F)OC1(F)OC(F)(F)C(F)(F)C(F)(F)OC1(F)C(F)(F)F                                                   | -7.99  | 59.26 | 2.08 | P | IN  |
| QL03290 | Pentafluoroethane-1-sulfonyl chloride                                                                                                           | 64773-40-6   | FC(F)(F)C(F)(F)S(Cl)(=O)=O                                                                                  | -6.05  | 54.55 | 1.32 | P | IN  |
| QL03291 | Heptafluoro-2-iodopropane                                                                                                                       | 677-69-0     | FC(F)(F)C(F)(F)I                                                                                            | -7.10  | 72.73 | 1.32 | P | OUT |
| QL03292 | 1,1,1,2,3,3,3-Heptafluoro-2-(1,1,2,3,3,3-hexafluoro-2-iodopropoxy)propane                                                                       | 16005-45-1   | FC(F)(F)C(F)(F)OC(F)(F)C(F)(F)C(F)(F)F                                                                      | -7.84  | 66.67 | 1.82 | P | OUT |
| QL03293 | Morpholine, 2,2,3,3,5,5,6-octafluoro-4-[1,2,2-tetrafluoro-1-(trifluoromethyl)ethyl]-                                                            | 1600-71-1    | FC(F)(F)C(F)(F)C(F)(F)OC(F)(F)C1(F)F                                                                        | -7.14  | 62.50 | 1.61 | P | OUT |
| QL03294 | Heptafluoroisopropyl acrylate                                                                                                                   | 13057-08-4   | FC(F)(F)C(F)(F)OC(=O)C=C                                                                                    | -5.95  | 38.89 | 1.69 | P | IN  |
| QL03295 | 1,1,1,2,3,3,3-Heptafluoropropan-2-yl benzoate                                                                                                   | 57024-21-2   | FC(F)(F)C(F)(F)OC(=O)C(=O)C                                                                                 | -6.29  | 29.17 | 2.10 | P | OUT |
| QL03296 | 2-(1,2-Dichloro-1,2,2-trifluoroethoxy)-1,1,1,2,3,3,3-heptafluoropropane                                                                         | 85720-81-6   | FC(F)(F)C(F)(F)OC(F)(F)Cl                                                                                   | -7.38  | 66.67 | 1.61 | P | OUT |
| QL03297 | 2-(2-Chloro-1,1,2-trifluoro-2-iodoethoxy)-1,1,1,2,3,3,3-heptafluoropropane                                                                      | 16031-04-2   | FC(F)(F)C(F)(F)OC(F)(F)Cl                                                                                   | -7.38  | 66.67 | 1.61 | P | OUT |
| QL03298 | 2-(2-Bromo-1,1,2,2-tetrafluoroethoxy)-1,1,1,2,3,3,3-heptafluoropropane                                                                          | 16005-49-5   | FC(F)(F)C(F)(F)OC(F)(F)Br                                                                                   | -9.64  | 66.67 | 2.64 | P | OUT |
| QL03299 | 1,1,2,2,3,3,4,4,5,5,6,6,7,7,8,8-Hexadecafluoro-1-[(1,1,1,2,3,3,3-heptafluoropropan-2-yl)oxy]-8-iodooctane                                       | 25080-19-7   | FC(F)(F)C(F)(F)OC(F)(F)C(F)(F)C(F)(F)C(F)(F)C(F)(F)C(F)(F)C(F)(F)F                                          | -9.05  | 55.56 | 2.67 | P | IN  |
| QL03300 | 1,1,2,2,3,3,4,4,5,5,6,6,7,7,8,8-Hexadecafluoro-1-[(1,1,1,2,3,3,3-heptafluoropropan-2-yl)oxy]-8-iodooctane                                       | 25080-25-5   | FC(F)(F)C(F)(F)OC(F)(F)C(F)(F)C(F)(F)C(F)(F)C(F)(F)C(F)(F)C(F)(F)F                                          | -9.08  | 66.67 | 2.39 | P | IN  |
| QL03301 | 1-iodo-6-(heptafluoroisopropoxy)perfluorohexane                                                                                                 | 25080-18-6   | FC(F)(F)C(F)(F)OC(F)(F)C(F)(F)C(F)(F)C(F)(F)C(F)(F)C(F)(F)F                                                 | -8.39  | 53.33 | 2.43 | P | IN  |
| QL03302 | 1,1,2,2,3,3,4,4-Octafluoro-1-[(1,1,1,2,3,3,3-heptafluoropropan-2-yl)oxy]-6-iodohexane                                                           | 25080-24-4   | FC(F)(F)C(F)(F)OC(F)(F)C(F)(F)C(F)(F)C(F)(F)C(F)(F)F                                                        | -8.41  | 66.67 | 2.08 | P | OUT |
| QL03303 | 1,1,2,2,3,3,4,4-Octafluoro-1-[(1,1,1,2,3,3,3-heptafluoropropan-2-yl)oxy]-4-iodobutane                                                           | 25080-17-5   | FC(F)(F)C(F)(F)OC(F)(F)C(F)(F)C(F)(F)C(F)(F)F                                                               | -8.86  | 64.71 | 2.34 | P | IN  |
| QL03304 | 1,1,2,2,3,3,4,4-Octafluoro-1,4-bis[(1,1,1,2,3,3,3-heptafluoropropan-2-yl)oxy]butane                                                             | 23228-90-2   | FC(F)(F)C(F)(F)OC(F)(F)C(F)(F)C(F)(F)OC(F)(F)C(F)(F)C(F)(F)F                                                | -6.72  | 22.92 | 2.47 | P | OUT |
| QL03305 | 1-[2,3,3,3-Tetrafluoro-2-(heptafluoropropoxy)-1-(piperidin-1-yl)propyl]-1H-benzotriazole                                                        | 133384-08-4  | FC(F)(F)C(F)(F)OC(F)(F)C(F)(F)C(F)(F)C1CCNCC1                                                               | -7.38  | 66.67 | 1.61 | P | OUT |
| QL03306 | 1,1,1,2,3,3,3-Heptafluoro-2-(1,1,2,2-tetrafluoro-2-iodoethoxy)propane                                                                           | 16005-38-2   | FC(F)(F)C(F)(F)OC(F)(F)C(F)(F)C(F)(F)OC1(F)C(F)(F)C(=O)C(F)(F)OC(F)(F)C(F)(F)F                              | -9.32  | 55.56 | 2.79 | P | IN  |
| QL03307 | Bis(perfluoro-1-[(3,6-dimethyl-1,4-dioxan-2-yl)oxy]ethyl) ketone                                                                                | 61097-96-9   | FC(F)(F)C(F)(F)OC1(F)OC(F)(F)C(F)(F)C(F)(F)OC1(F)C(F)(F)C(=O)C(F)(F)OC(F)(F)C(F)(F)F                        | -9.19  | 57.69 | 2.68 | P | IN  |
| QL03308 | Perfluoro-2,3-bis(2,5-dimethyl-1,4-dioxan-3-oxy)butane                                                                                          | 61097-98-1   | FC(F)(F)C(F)(F)OC(F)(F)C(F)(F)C(F)(F)C(F)(F)C(F)(F)F                                                        | -6.55  | 24.14 | 2.36 | P | OUT |
| QL03309 | 2-[(1,1,1,2,3,3,3-Heptafluoropropan-2-yl)oxy]-N-phenylacetamide                                                                                 | 62656-67-1   | FC(F)(F)C(F)(F)OCC(=O)NC1=CC=CC=C1                                                                          | -5.83  | 36.84 | 1.69 | P | IN  |
| QL03310 | Allyl perfluoroisopropyl ether                                                                                                                  | 15242-17-8   | FC(F)(F)C(F)(F)OCC=C                                                                                        | -6.61  | 41.67 | 1.92 | P | IN  |
| QL03311 | Trichloro[3-[1,2,2,2-tetrafluoro-1-(trifluoromethyl)ethoxy]propyl]silane                                                                        | 15538-93-9   | FC(F)(F)C(F)(F)OCC(Si)(Cl)(Cl)C(F)(F)F                                                                      | -6.43  | 33.33 | 2.06 | P | IN  |
| QL03312 | Dichloromethyl[3-[1,2,2,2-tetrafluoro-1-(trifluoromethyl)ethoxy]propyl]silane                                                                   | 20006-68-2   | FC(F)(F)C(F)(F)OCC(SiH2)(Cl)C(F)(F)F                                                                        | -6.35  | 33.33 | 2.02 | P | IN  |
| QL03313 | 1-Bromo-4-[(1,1,1,2,3,3,3-heptafluoropropan-2-yl)oxy]butane                                                                                     | 37027-49-9   | FC(F)(F)C(F)(F)OCCBr                                                                                        | -8.04  | 62.07 | 2.04 | P | IN  |
| QL03314 | 1,1,1,2,3,3,5,5,7,7,7-Undecafluoro-6-iodo-2,4-bis(trifluoromethyl)heptane                                                                       | 922524-01-4  | FC(F)(F)C(F)(F)C(F)(F)C(F)(F)C(F)(F)C(F)(F)C(F)(F)F                                                         | -7.51  | 65.00 | 1.71 | P | OUT |
| QL03315 | 1,1,1,2,3,3,5,5,5-Nonafluoro-4-iodo-2-(trifluoromethyl)pentane                                                                                  | 922524-00-3  | FC(F)(F)C(F)(F)C(F)(F)C(F)(F)C(F)(F)F                                                                       | -9.14  | 65.52 | 2.45 | P | IN  |
| QL03316 | 1,1,1,2,2,3,3,4,4,5,5,6,6,7,7,9,9,9-Octadecafluoro-8-iodononane                                                                                 | 922524-04-7  | FC(F)(F)C(F)(F)C(F)(F)C(F)(F)C(F)(F)C(F)(F)C(F)(F)C(F)(F)F                                                  | -7.32  | 48.28 | 2.07 | P | IN  |
| QL03317 | 1,1,1,2,7,7,7-Heptafluoro-6-iodo-2,4-bis(trifluoromethyl)heptane                                                                                | 922523-99-7  | FC(F)(F)C(F)(F)C(F)(F)C(F)(F)C(F)(F)C(F)(F)F                                                                | -6.70  | 55.00 | 1.61 | P | IN  |
| QL03318 | 1,1,1,2,5,5,5-Heptafluoro-4-iodo-2-(trifluoromethyl)pentane                                                                                     | 922523-98-6  | FC(F)(F)C(F)(F)C(F)(F)C(F)(F)F                                                                              | -8.74  | 58.62 | 2.45 | P | IN  |
| QL03319 | 1,1,1,2,2,3,3,4,4,5,5,6,6,9,9,9-Hexadecafluoro-8-iodononane                                                                                     | 922524-02-5  | FC(F)(F)C(F)(F)C(F)(F)C(F)(F)C(F)(F)C(F)(F)C(F)(F)F                                                         | -8.01  | 56.52 | 2.17 | P | IN  |
| QL03320 | 1,1,1,2,2,3,3,4,4,7,7,7-Dodecafluoro-6-iodoheptane                                                                                              | 935553-88-1  | FC(F)(F)C(F)(F)C(F)(F)C(F)(F)C(F)(F)F                                                                       |        |       |      | P | IN  |

|         |                                                                                                    |              |                                                                                                                                                                                                                                                                                                                                                                                                                                                                                                                                                                                                                                                                                                                                                                                                                                                                                                                                                                                                                                                                                                                                                                                                                                                                                                                                                                                                                                                                                                                                                                                                                                                                                                                                                                                                                                                                                                                                                                                                                                                                                                                                                                                                                                                                                                                                                                                                                                                                                                                                                                                                                                                                                                                                                                                                                                                                                                                                                                                                                                                                                                                                                                                                                                                                                                                                                                                                                                                                                                                                                                                                                                                                                                                                                                                                                                                                                                                                                                                                                                                                                                                                                                                                                                                                                                                                                                                                                                                                                                                                                                                                                                                                                                                                                                                                                                                                                                                                                                                                                                                                                                                                                                                                                                                                                                                                                                                                                                                                                                                                                                                                                                                                                                                                                                                           |       |       |      |   |     |
|---------|----------------------------------------------------------------------------------------------------|--------------|-------------------------------------------------------------------------------------------------------------------------------------------------------------------------------------------------------------------------------------------------------------------------------------------------------------------------------------------------------------------------------------------------------------------------------------------------------------------------------------------------------------------------------------------------------------------------------------------------------------------------------------------------------------------------------------------------------------------------------------------------------------------------------------------------------------------------------------------------------------------------------------------------------------------------------------------------------------------------------------------------------------------------------------------------------------------------------------------------------------------------------------------------------------------------------------------------------------------------------------------------------------------------------------------------------------------------------------------------------------------------------------------------------------------------------------------------------------------------------------------------------------------------------------------------------------------------------------------------------------------------------------------------------------------------------------------------------------------------------------------------------------------------------------------------------------------------------------------------------------------------------------------------------------------------------------------------------------------------------------------------------------------------------------------------------------------------------------------------------------------------------------------------------------------------------------------------------------------------------------------------------------------------------------------------------------------------------------------------------------------------------------------------------------------------------------------------------------------------------------------------------------------------------------------------------------------------------------------------------------------------------------------------------------------------------------------------------------------------------------------------------------------------------------------------------------------------------------------------------------------------------------------------------------------------------------------------------------------------------------------------------------------------------------------------------------------------------------------------------------------------------------------------------------------------------------------------------------------------------------------------------------------------------------------------------------------------------------------------------------------------------------------------------------------------------------------------------------------------------------------------------------------------------------------------------------------------------------------------------------------------------------------------------------------------------------------------------------------------------------------------------------------------------------------------------------------------------------------------------------------------------------------------------------------------------------------------------------------------------------------------------------------------------------------------------------------------------------------------------------------------------------------------------------------------------------------------------------------------------------------------------------------------------------------------------------------------------------------------------------------------------------------------------------------------------------------------------------------------------------------------------------------------------------------------------------------------------------------------------------------------------------------------------------------------------------------------------------------------------------------------------------------------------------------------------------------------------------------------------------------------------------------------------------------------------------------------------------------------------------------------------------------------------------------------------------------------------------------------------------------------------------------------------------------------------------------------------------------------------------------------------------------------------------------------------------------------------------------------------------------------------------------------------------------------------------------------------------------------------------------------------------------------------------------------------------------------------------------------------------------------------------------------------------------------------------------------------------------------------------------------------------------------------------------|-------|-------|------|---|-----|
| QL03321 | 1,1,1,3,3,3-Hexafluoropropan-2-yl heptafluorobutanoate                                             | 922168-41-0  | FC(F)(F)C(OC(=O)C(F)(F)C(F)(F)C(F)(F)F                                                                                                                                                                                                                                                                                                                                                                                                                                                                                                                                                                                                                                                                                                                                                                                                                                                                                                                                                                                                                                                                                                                                                                                                                                                                                                                                                                                                                                                                                                                                                                                                                                                                                                                                                                                                                                                                                                                                                                                                                                                                                                                                                                                                                                                                                                                                                                                                                                                                                                                                                                                                                                                                                                                                                                                                                                                                                                                                                                                                                                                                                                                                                                                                                                                                                                                                                                                                                                                                                                                                                                                                                                                                                                                                                                                                                                                                                                                                                                                                                                                                                                                                                                                                                                                                                                                                                                                                                                                                                                                                                                                                                                                                                                                                                                                                                                                                                                                                                                                                                                                                                                                                                                                                                                                                                                                                                                                                                                                                                                                                                                                                                                                                                                                                                    | -7.77 | 56.52 | 2.06 | P | IN  |
| QL03322 | Hexafluoroisopropyl acrylate                                                                       | 2160-89-6    | FC(F)(F)C(OC(=O)C=C)C(F)(F)F                                                                                                                                                                                                                                                                                                                                                                                                                                                                                                                                                                                                                                                                                                                                                                                                                                                                                                                                                                                                                                                                                                                                                                                                                                                                                                                                                                                                                                                                                                                                                                                                                                                                                                                                                                                                                                                                                                                                                                                                                                                                                                                                                                                                                                                                                                                                                                                                                                                                                                                                                                                                                                                                                                                                                                                                                                                                                                                                                                                                                                                                                                                                                                                                                                                                                                                                                                                                                                                                                                                                                                                                                                                                                                                                                                                                                                                                                                                                                                                                                                                                                                                                                                                                                                                                                                                                                                                                                                                                                                                                                                                                                                                                                                                                                                                                                                                                                                                                                                                                                                                                                                                                                                                                                                                                                                                                                                                                                                                                                                                                                                                                                                                                                                                                                              | -5.62 | 33.33 | 1.69 | P | IN  |
| QL03323 | 1,1,1,3,3,3-Hexafluoropropan-2-yl nonafluorobutane-1-sulfonate                                     | 118334-96-6  | FC(F)(F)C(OS(=O)=O)C(F)(F)C(F)(F)C(F)(F)C(F)(F)F                                                                                                                                                                                                                                                                                                                                                                                                                                                                                                                                                                                                                                                                                                                                                                                                                                                                                                                                                                                                                                                                                                                                                                                                                                                                                                                                                                                                                                                                                                                                                                                                                                                                                                                                                                                                                                                                                                                                                                                                                                                                                                                                                                                                                                                                                                                                                                                                                                                                                                                                                                                                                                                                                                                                                                                                                                                                                                                                                                                                                                                                                                                                                                                                                                                                                                                                                                                                                                                                                                                                                                                                                                                                                                                                                                                                                                                                                                                                                                                                                                                                                                                                                                                                                                                                                                                                                                                                                                                                                                                                                                                                                                                                                                                                                                                                                                                                                                                                                                                                                                                                                                                                                                                                                                                                                                                                                                                                                                                                                                                                                                                                                                                                                                                                          | -7.97 | 55.56 | 2.18 | P | IN  |
| QL03324 | H-substituted perfluoroalkyl (linear) sulfonic acids_ii, n=0                                       |              | FC(F)(F)C(S(=O)(O)=O)H(F)                                                                                                                                                                                                                                                                                                                                                                                                                                                                                                                                                                                                                                                                                                                                                                                                                                                                                                                                                                                                                                                                                                                                                                                                                                                                                                                                                                                                                                                                                                                                                                                                                                                                                                                                                                                                                                                                                                                                                                                                                                                                                                                                                                                                                                                                                                                                                                                                                                                                                                                                                                                                                                                                                                                                                                                                                                                                                                                                                                                                                                                                                                                                                                                                                                                                                                                                                                                                                                                                                                                                                                                                                                                                                                                                                                                                                                                                                                                                                                                                                                                                                                                                                                                                                                                                                                                                                                                                                                                                                                                                                                                                                                                                                                                                                                                                                                                                                                                                                                                                                                                                                                                                                                                                                                                                                                                                                                                                                                                                                                                                                                                                                                                                                                                                                                 | -4.76 | 33.33 | 1.30 | P | OUT |
| QL03325 | 1,1,1,4,4,5,5,6,6,7,7,8,8,9,9-Hexadecafluoronon-2-ene                                              | 935477-01-3  | FC(F)(F)C=C(C(F)(F)C(F)(F)C(F)(F)C(F)(F)C(F)(F)F                                                                                                                                                                                                                                                                                                                                                                                                                                                                                                                                                                                                                                                                                                                                                                                                                                                                                                                                                                                                                                                                                                                                                                                                                                                                                                                                                                                                                                                                                                                                                                                                                                                                                                                                                                                                                                                                                                                                                                                                                                                                                                                                                                                                                                                                                                                                                                                                                                                                                                                                                                                                                                                                                                                                                                                                                                                                                                                                                                                                                                                                                                                                                                                                                                                                                                                                                                                                                                                                                                                                                                                                                                                                                                                                                                                                                                                                                                                                                                                                                                                                                                                                                                                                                                                                                                                                                                                                                                                                                                                                                                                                                                                                                                                                                                                                                                                                                                                                                                                                                                                                                                                                                                                                                                                                                                                                                                                                                                                                                                                                                                                                                                                                                                                                          | -8.77 | 59.26 | 2.44 | P | IN  |
| QL03326 | 1,1,1,4,4,5,5,6,6,7,7,8,8,9-Tetradecafluorooct-2-ene                                               | 935476-95-2  | FC(F)(F)C=C(C(F)(F)C(F)(F)C(F)(F)C(F)(F)C(F)(F)F                                                                                                                                                                                                                                                                                                                                                                                                                                                                                                                                                                                                                                                                                                                                                                                                                                                                                                                                                                                                                                                                                                                                                                                                                                                                                                                                                                                                                                                                                                                                                                                                                                                                                                                                                                                                                                                                                                                                                                                                                                                                                                                                                                                                                                                                                                                                                                                                                                                                                                                                                                                                                                                                                                                                                                                                                                                                                                                                                                                                                                                                                                                                                                                                                                                                                                                                                                                                                                                                                                                                                                                                                                                                                                                                                                                                                                                                                                                                                                                                                                                                                                                                                                                                                                                                                                                                                                                                                                                                                                                                                                                                                                                                                                                                                                                                                                                                                                                                                                                                                                                                                                                                                                                                                                                                                                                                                                                                                                                                                                                                                                                                                                                                                                                                          | -8.26 | 58.33 | 2.23 | P | IN  |
| QL03327 | 1,1,1,4,4,5,5,6,6,7,7-Dodecafluorohept-2-ene                                                       | 887111-62-8  | FC(F)(F)C=C(C(F)(F)C(F)(F)C(F)(F)C(F)(F)F                                                                                                                                                                                                                                                                                                                                                                                                                                                                                                                                                                                                                                                                                                                                                                                                                                                                                                                                                                                                                                                                                                                                                                                                                                                                                                                                                                                                                                                                                                                                                                                                                                                                                                                                                                                                                                                                                                                                                                                                                                                                                                                                                                                                                                                                                                                                                                                                                                                                                                                                                                                                                                                                                                                                                                                                                                                                                                                                                                                                                                                                                                                                                                                                                                                                                                                                                                                                                                                                                                                                                                                                                                                                                                                                                                                                                                                                                                                                                                                                                                                                                                                                                                                                                                                                                                                                                                                                                                                                                                                                                                                                                                                                                                                                                                                                                                                                                                                                                                                                                                                                                                                                                                                                                                                                                                                                                                                                                                                                                                                                                                                                                                                                                                                                                 | -8.05 | 57.14 | 2.17 | P | IN  |
| QL03328 | (ZE)-1,1,1,4,4,5,5,6,6-Decafluorohex-2-ene                                                         | 83227-62-7   | FC(F)(F)C=C(C(F)(F)C(F)(F)C(F)(F)F                                                                                                                                                                                                                                                                                                                                                                                                                                                                                                                                                                                                                                                                                                                                                                                                                                                                                                                                                                                                                                                                                                                                                                                                                                                                                                                                                                                                                                                                                                                                                                                                                                                                                                                                                                                                                                                                                                                                                                                                                                                                                                                                                                                                                                                                                                                                                                                                                                                                                                                                                                                                                                                                                                                                                                                                                                                                                                                                                                                                                                                                                                                                                                                                                                                                                                                                                                                                                                                                                                                                                                                                                                                                                                                                                                                                                                                                                                                                                                                                                                                                                                                                                                                                                                                                                                                                                                                                                                                                                                                                                                                                                                                                                                                                                                                                                                                                                                                                                                                                                                                                                                                                                                                                                                                                                                                                                                                                                                                                                                                                                                                                                                                                                                                                                        | -7.38 | 55.56 | 1.91 | P | IN  |
| QL03329 | Cyclohexane, decafluorobis(trifluoromethyl)- (6Cl,7Cl,8Cl,9Cl)                                     | 26637-68-3   | FC(F)(F)C1(C(F)(F)C(F)(F)C(F)(F)C(F)(F)C1(F)F                                                                                                                                                                                                                                                                                                                                                                                                                                                                                                                                                                                                                                                                                                                                                                                                                                                                                                                                                                                                                                                                                                                                                                                                                                                                                                                                                                                                                                                                                                                                                                                                                                                                                                                                                                                                                                                                                                                                                                                                                                                                                                                                                                                                                                                                                                                                                                                                                                                                                                                                                                                                                                                                                                                                                                                                                                                                                                                                                                                                                                                                                                                                                                                                                                                                                                                                                                                                                                                                                                                                                                                                                                                                                                                                                                                                                                                                                                                                                                                                                                                                                                                                                                                                                                                                                                                                                                                                                                                                                                                                                                                                                                                                                                                                                                                                                                                                                                                                                                                                                                                                                                                                                                                                                                                                                                                                                                                                                                                                                                                                                                                                                                                                                                                                             | -7.17 | 66.67 | 1.52 | P | OUT |
| QL03330 | Perfluorodimethylcyclobutane                                                                       | 28677-00-1   | FC(F)(F)C1(C(F)(F)C(F)(F)C(F)(F)C1(F)F                                                                                                                                                                                                                                                                                                                                                                                                                                                                                                                                                                                                                                                                                                                                                                                                                                                                                                                                                                                                                                                                                                                                                                                                                                                                                                                                                                                                                                                                                                                                                                                                                                                                                                                                                                                                                                                                                                                                                                                                                                                                                                                                                                                                                                                                                                                                                                                                                                                                                                                                                                                                                                                                                                                                                                                                                                                                                                                                                                                                                                                                                                                                                                                                                                                                                                                                                                                                                                                                                                                                                                                                                                                                                                                                                                                                                                                                                                                                                                                                                                                                                                                                                                                                                                                                                                                                                                                                                                                                                                                                                                                                                                                                                                                                                                                                                                                                                                                                                                                                                                                                                                                                                                                                                                                                                                                                                                                                                                                                                                                                                                                                                                                                                                                                                    | -7.09 | 66.67 | 1.48 | P | OUT |
| QL03331 | Perfluoro-1,3,5-trimethylcyclohexane                                                               | 374-76-5     | FC(F)(F)C1(F)C(F)(F)C(F)(F)C(F)(F)C(F)(F)C1(F)F                                                                                                                                                                                                                                                                                                                                                                                                                                                                                                                                                                                                                                                                                                                                                                                                                                                                                                                                                                                                                                                                                                                                                                                                                                                                                                                                                                                                                                                                                                                                                                                                                                                                                                                                                                                                                                                                                                                                                                                                                                                                                                                                                                                                                                                                                                                                                                                                                                                                                                                                                                                                                                                                                                                                                                                                                                                                                                                                                                                                                                                                                                                                                                                                                                                                                                                                                                                                                                                                                                                                                                                                                                                                                                                                                                                                                                                                                                                                                                                                                                                                                                                                                                                                                                                                                                                                                                                                                                                                                                                                                                                                                                                                                                                                                                                                                                                                                                                                                                                                                                                                                                                                                                                                                                                                                                                                                                                                                                                                                                                                                                                                                                                                                                                                           | -6.81 | 66.67 | 1.35 | P | OUT |
| QL03332 | Cyclobutane, 1,1,2,3,3,4-hexafluoro-2,4-bis(trifluoromethyl)-                                      | 13221-71-1   | FC(F)(F)C1(F)C(F)(F)C(F)(F)C(F)(F)C1(F)F                                                                                                                                                                                                                                                                                                                                                                                                                                                                                                                                                                                                                                                                                                                                                                                                                                                                                                                                                                                                                                                                                                                                                                                                                                                                                                                                                                                                                                                                                                                                                                                                                                                                                                                                                                                                                                                                                                                                                                                                                                                                                                                                                                                                                                                                                                                                                                                                                                                                                                                                                                                                                                                                                                                                                                                                                                                                                                                                                                                                                                                                                                                                                                                                                                                                                                                                                                                                                                                                                                                                                                                                                                                                                                                                                                                                                                                                                                                                                                                                                                                                                                                                                                                                                                                                                                                                                                                                                                                                                                                                                                                                                                                                                                                                                                                                                                                                                                                                                                                                                                                                                                                                                                                                                                                                                                                                                                                                                                                                                                                                                                                                                                                                                                                                                  | -7.99 | 66.67 | 1.89 | P | OUT |
| QL03333 | 1,1,2,2,3,4,4,5,5,6-Decafluoro-3,6-bis(trifluoromethyl)cyclohexane                                 | 374-77-6     | FC(F)(F)C1(F)C(F)(F)C(F)(F)C(F)(F)C(F)(F)C1(F)F                                                                                                                                                                                                                                                                                                                                                                                                                                                                                                                                                                                                                                                                                                                                                                                                                                                                                                                                                                                                                                                                                                                                                                                                                                                                                                                                                                                                                                                                                                                                                                                                                                                                                                                                                                                                                                                                                                                                                                                                                                                                                                                                                                                                                                                                                                                                                                                                                                                                                                                                                                                                                                                                                                                                                                                                                                                                                                                                                                                                                                                                                                                                                                                                                                                                                                                                                                                                                                                                                                                                                                                                                                                                                                                                                                                                                                                                                                                                                                                                                                                                                                                                                                                                                                                                                                                                                                                                                                                                                                                                                                                                                                                                                                                                                                                                                                                                                                                                                                                                                                                                                                                                                                                                                                                                                                                                                                                                                                                                                                                                                                                                                                                                                                                                           | -7.99 | 66.67 | 1.89 | P | OUT |
| QL03334 | Perfluoro-1,3-dimethylcyclohexane                                                                  | 335-27-3     | FC(F)(F)C1(F)C(F)(F)C(F)(F)C(F)(F)C(F)(F)C1(F)F                                                                                                                                                                                                                                                                                                                                                                                                                                                                                                                                                                                                                                                                                                                                                                                                                                                                                                                                                                                                                                                                                                                                                                                                                                                                                                                                                                                                                                                                                                                                                                                                                                                                                                                                                                                                                                                                                                                                                                                                                                                                                                                                                                                                                                                                                                                                                                                                                                                                                                                                                                                                                                                                                                                                                                                                                                                                                                                                                                                                                                                                                                                                                                                                                                                                                                                                                                                                                                                                                                                                                                                                                                                                                                                                                                                                                                                                                                                                                                                                                                                                                                                                                                                                                                                                                                                                                                                                                                                                                                                                                                                                                                                                                                                                                                                                                                                                                                                                                                                                                                                                                                                                                                                                                                                                                                                                                                                                                                                                                                                                                                                                                                                                                                                                           | -7.10 | 66.67 | 1.48 | P | OUT |
| QL03335 | Perfluoro-5,5'-bis(trifluoromethyl)-1,1'-bicyclohexyl                                              | 105462-77-9  | FC(F)(F)C1(F)C(F)(F)C(F)(F)C(F)(F)C1(F)C(F)(F)C(F)(F)C(F)(F)C1(F)F                                                                                                                                                                                                                                                                                                                                                                                                                                                                                                                                                                                                                                                                                                                                                                                                                                                                                                                                                                                                                                                                                                                                                                                                                                                                                                                                                                                                                                                                                                                                                                                                                                                                                                                                                                                                                                                                                                                                                                                                                                                                                                                                                                                                                                                                                                                                                                                                                                                                                                                                                                                                                                                                                                                                                                                                                                                                                                                                                                                                                                                                                                                                                                                                                                                                                                                                                                                                                                                                                                                                                                                                                                                                                                                                                                                                                                                                                                                                                                                                                                                                                                                                                                                                                                                                                                                                                                                                                                                                                                                                                                                                                                                                                                                                                                                                                                                                                                                                                                                                                                                                                                                                                                                                                                                                                                                                                                                                                                                                                                                                                                                                                                                                                                                        | -8.46 | 65.00 | 2.15 | P | IN  |
| QL03336 | Perfluoro-1,2-dimethylcyclohexane                                                                  | 306-98-9     | FC(F)(F)C1(F)C(F)(F)C(F)(F)C(F)(F)C1(F)C(F)(F)F                                                                                                                                                                                                                                                                                                                                                                                                                                                                                                                                                                                                                                                                                                                                                                                                                                                                                                                                                                                                                                                                                                                                                                                                                                                                                                                                                                                                                                                                                                                                                                                                                                                                                                                                                                                                                                                                                                                                                                                                                                                                                                                                                                                                                                                                                                                                                                                                                                                                                                                                                                                                                                                                                                                                                                                                                                                                                                                                                                                                                                                                                                                                                                                                                                                                                                                                                                                                                                                                                                                                                                                                                                                                                                                                                                                                                                                                                                                                                                                                                                                                                                                                                                                                                                                                                                                                                                                                                                                                                                                                                                                                                                                                                                                                                                                                                                                                                                                                                                                                                                                                                                                                                                                                                                                                                                                                                                                                                                                                                                                                                                                                                                                                                                                                           | -7.10 | 66.67 | 1.48 | P | OUT |
| QL03337 | Perfluoromethylcyclohexane                                                                         | 355-02-2     | FC(F)(F)C1(F)C(F)(F)C(F)(F)C(F)(F)C1(F)F                                                                                                                                                                                                                                                                                                                                                                                                                                                                                                                                                                                                                                                                                                                                                                                                                                                                                                                                                                                                                                                                                                                                                                                                                                                                                                                                                                                                                                                                                                                                                                                                                                                                                                                                                                                                                                                                                                                                                                                                                                                                                                                                                                                                                                                                                                                                                                                                                                                                                                                                                                                                                                                                                                                                                                                                                                                                                                                                                                                                                                                                                                                                                                                                                                                                                                                                                                                                                                                                                                                                                                                                                                                                                                                                                                                                                                                                                                                                                                                                                                                                                                                                                                                                                                                                                                                                                                                                                                                                                                                                                                                                                                                                                                                                                                                                                                                                                                                                                                                                                                                                                                                                                                                                                                                                                                                                                                                                                                                                                                                                                                                                                                                                                                                                                  | -7.08 | 66.67 | 1.47 | P | OUT |
| QL03338 | Cyclohexanesulfonyl fluoride, decafluoro(trifluoromethyl)-                                         | 68318-34-3   | FC(F)(F)C1(F)C(F)(F)C(F)(F)C(F)(F)C1(F)S(F)(=O)=O                                                                                                                                                                                                                                                                                                                                                                                                                                                                                                                                                                                                                                                                                                                                                                                                                                                                                                                                                                                                                                                                                                                                                                                                                                                                                                                                                                                                                                                                                                                                                                                                                                                                                                                                                                                                                                                                                                                                                                                                                                                                                                                                                                                                                                                                                                                                                                                                                                                                                                                                                                                                                                                                                                                                                                                                                                                                                                                                                                                                                                                                                                                                                                                                                                                                                                                                                                                                                                                                                                                                                                                                                                                                                                                                                                                                                                                                                                                                                                                                                                                                                                                                                                                                                                                                                                                                                                                                                                                                                                                                                                                                                                                                                                                                                                                                                                                                                                                                                                                                                                                                                                                                                                                                                                                                                                                                                                                                                                                                                                                                                                                                                                                                                                                                         | -6.62 | 58.33 | 1.48 | P | IN  |
| QL03339 | Perfluoromethylcyclopentane                                                                        | 1805-22-7    | FC(F)(F)C1(F)C(F)(F)C(F)(F)C(F)(F)C1(F)F                                                                                                                                                                                                                                                                                                                                                                                                                                                                                                                                                                                                                                                                                                                                                                                                                                                                                                                                                                                                                                                                                                                                                                                                                                                                                                                                                                                                                                                                                                                                                                                                                                                                                                                                                                                                                                                                                                                                                                                                                                                                                                                                                                                                                                                                                                                                                                                                                                                                                                                                                                                                                                                                                                                                                                                                                                                                                                                                                                                                                                                                                                                                                                                                                                                                                                                                                                                                                                                                                                                                                                                                                                                                                                                                                                                                                                                                                                                                                                                                                                                                                                                                                                                                                                                                                                                                                                                                                                                                                                                                                                                                                                                                                                                                                                                                                                                                                                                                                                                                                                                                                                                                                                                                                                                                                                                                                                                                                                                                                                                                                                                                                                                                                                                                                  | -7.09 | 66.67 | 1.48 | P | OUT |
| QL03340 | Perfluoromethyldecalin                                                                             | 51294-16-7   | FC(F)(F)C1(F)C(F)(F)C(F)(F)C(F)(F)C2(F)(F)C(F)(F)C(F)(F)C2(F)F                                                                                                                                                                                                                                                                                                                                                                                                                                                                                                                                                                                                                                                                                                                                                                                                                                                                                                                                                                                                                                                                                                                                                                                                                                                                                                                                                                                                                                                                                                                                                                                                                                                                                                                                                                                                                                                                                                                                                                                                                                                                                                                                                                                                                                                                                                                                                                                                                                                                                                                                                                                                                                                                                                                                                                                                                                                                                                                                                                                                                                                                                                                                                                                                                                                                                                                                                                                                                                                                                                                                                                                                                                                                                                                                                                                                                                                                                                                                                                                                                                                                                                                                                                                                                                                                                                                                                                                                                                                                                                                                                                                                                                                                                                                                                                                                                                                                                                                                                                                                                                                                                                                                                                                                                                                                                                                                                                                                                                                                                                                                                                                                                                                                                                                            | -7.61 | 64.52 | 1.77 | P | OUT |
| QL03341 | Perfluoro-1,2-dimethylcyclobutane                                                                  | 2994-71-0    | FC(F)(F)C1(F)C(F)(F)C(F)(F)C(F)(F)C1(F)F                                                                                                                                                                                                                                                                                                                                                                                                                                                                                                                                                                                                                                                                                                                                                                                                                                                                                                                                                                                                                                                                                                                                                                                                                                                                                                                                                                                                                                                                                                                                                                                                                                                                                                                                                                                                                                                                                                                                                                                                                                                                                                                                                                                                                                                                                                                                                                                                                                                                                                                                                                                                                                                                                                                                                                                                                                                                                                                                                                                                                                                                                                                                                                                                                                                                                                                                                                                                                                                                                                                                                                                                                                                                                                                                                                                                                                                                                                                                                                                                                                                                                                                                                                                                                                                                                                                                                                                                                                                                                                                                                                                                                                                                                                                                                                                                                                                                                                                                                                                                                                                                                                                                                                                                                                                                                                                                                                                                                                                                                                                                                                                                                                                                                                                                                  | -6.81 | 66.67 | 1.35 | P | OUT |
| QL03342 | Perfluoro-2-methyldecalin                                                                          | 306-95-6     | FC(F)(F)C1(F)C(F)(F)C(F)(F)C2(F)(F)C(F)(F)C(F)(F)C2(F)C1(F)F                                                                                                                                                                                                                                                                                                                                                                                                                                                                                                                                                                                                                                                                                                                                                                                                                                                                                                                                                                                                                                                                                                                                                                                                                                                                                                                                                                                                                                                                                                                                                                                                                                                                                                                                                                                                                                                                                                                                                                                                                                                                                                                                                                                                                                                                                                                                                                                                                                                                                                                                                                                                                                                                                                                                                                                                                                                                                                                                                                                                                                                                                                                                                                                                                                                                                                                                                                                                                                                                                                                                                                                                                                                                                                                                                                                                                                                                                                                                                                                                                                                                                                                                                                                                                                                                                                                                                                                                                                                                                                                                                                                                                                                                                                                                                                                                                                                                                                                                                                                                                                                                                                                                                                                                                                                                                                                                                                                                                                                                                                                                                                                                                                                                                                                              | -8.23 | 64.52 | 2.06 | P | IN  |
| QL03343 | Perfluoro-3,6-dimethyl-1,4-dioxan-2-one                                                            | 7309-84-4    | FC(F)(F)C1(F)OC(F)(F)C(F)(F)OC1=O(C(F)(F)F                                                                                                                                                                                                                                                                                                                                                                                                                                                                                                                                                                                                                                                                                                                                                                                                                                                                                                                                                                                                                                                                                                                                                                                                                                                                                                                                                                                                                                                                                                                                                                                                                                                                                                                                                                                                                                                                                                                                                                                                                                                                                                                                                                                                                                                                                                                                                                                                                                                                                                                                                                                                                                                                                                                                                                                                                                                                                                                                                                                                                                                                                                                                                                                                                                                                                                                                                                                                                                                                                                                                                                                                                                                                                                                                                                                                                                                                                                                                                                                                                                                                                                                                                                                                                                                                                                                                                                                                                                                                                                                                                                                                                                                                                                                                                                                                                                                                                                                                                                                                                                                                                                                                                                                                                                                                                                                                                                                                                                                                                                                                                                                                                                                                                                                                                | -7.37 | 52.63 | 1.98 | P | IN  |
| QL03344 | Perfluoromethyloxirane                                                                             | 428-59-1     | FC(F)(F)C1(F)OC1(F)F                                                                                                                                                                                                                                                                                                                                                                                                                                                                                                                                                                                                                                                                                                                                                                                                                                                                                                                                                                                                                                                                                                                                                                                                                                                                                                                                                                                                                                                                                                                                                                                                                                                                                                                                                                                                                                                                                                                                                                                                                                                                                                                                                                                                                                                                                                                                                                                                                                                                                                                                                                                                                                                                                                                                                                                                                                                                                                                                                                                                                                                                                                                                                                                                                                                                                                                                                                                                                                                                                                                                                                                                                                                                                                                                                                                                                                                                                                                                                                                                                                                                                                                                                                                                                                                                                                                                                                                                                                                                                                                                                                                                                                                                                                                                                                                                                                                                                                                                                                                                                                                                                                                                                                                                                                                                                                                                                                                                                                                                                                                                                                                                                                                                                                                                                                      | -6.45 | 60.00 | 1.36 | P | OUT |
| QL03345 | Perfluoroalkyl N-heterocycles, m+n+p=6                                                             |              | FC(F)(F)C1=C(OC(F)(F)F)N=C(C(F)(F)C(F)(F)C(F)(F)F)[N]-1                                                                                                                                                                                                                                                                                                                                                                                                                                                                                                                                                                                                                                                                                                                                                                                                                                                                                                                                                                                                                                                                                                                                                                                                                                                                                                                                                                                                                                                                                                                                                                                                                                                                                                                                                                                                                                                                                                                                                                                                                                                                                                                                                                                                                                                                                                                                                                                                                                                                                                                                                                                                                                                                                                                                                                                                                                                                                                                                                                                                                                                                                                                                                                                                                                                                                                                                                                                                                                                                                                                                                                                                                                                                                                                                                                                                                                                                                                                                                                                                                                                                                                                                                                                                                                                                                                                                                                                                                                                                                                                                                                                                                                                                                                                                                                                                                                                                                                                                                                                                                                                                                                                                                                                                                                                                                                                                                                                                                                                                                                                                                                                                                                                                                                                                   | -7.96 | 55.56 | 2.17 | P | IN  |
| QL03346 | 2,2,3,3,4,4,5,5,6,6,7,7,8,8,9,9-Heptadecafluoro-N-[3-(trifluoromethyl)phenyl]nonanamide            | 325989-96-6  | FC(F)(F)C1cccc(NC(=O)C(F)(F)C(F)(F)C(F)(F)C(F)(F)C(F)(F)C(F)(F)C(F)(F)C1                                                                                                                                                                                                                                                                                                                                                                                                                                                                                                                                                                                                                                                                                                                                                                                                                                                                                                                                                                                                                                                                                                                                                                                                                                                                                                                                                                                                                                                                                                                                                                                                                                                                                                                                                                                                                                                                                                                                                                                                                                                                                                                                                                                                                                                                                                                                                                                                                                                                                                                                                                                                                                                                                                                                                                                                                                                                                                                                                                                                                                                                                                                                                                                                                                                                                                                                                                                                                                                                                                                                                                                                                                                                                                                                                                                                                                                                                                                                                                                                                                                                                                                                                                                                                                                                                                                                                                                                                                                                                                                                                                                                                                                                                                                                                                                                                                                                                                                                                                                                                                                                                                                                                                                                                                                                                                                                                                                                                                                                                                                                                                                                                                                                                                                  | -9.14 | 46.51 | 2.95 | P | IN  |
| QL03347 | 2,2,3,3,4,4,4-Heptafluoro-N-[3-(trifluoromethyl)phenyl]butanamide                                  | 2059-15-6    | FC(F)(F)C1cccc(NC(=O)C(F)(F)C(F)(F)C(F)(F)C1                                                                                                                                                                                                                                                                                                                                                                                                                                                                                                                                                                                                                                                                                                                                                                                                                                                                                                                                                                                                                                                                                                                                                                                                                                                                                                                                                                                                                                                                                                                                                                                                                                                                                                                                                                                                                                                                                                                                                                                                                                                                                                                                                                                                                                                                                                                                                                                                                                                                                                                                                                                                                                                                                                                                                                                                                                                                                                                                                                                                                                                                                                                                                                                                                                                                                                                                                                                                                                                                                                                                                                                                                                                                                                                                                                                                                                                                                                                                                                                                                                                                                                                                                                                                                                                                                                                                                                                                                                                                                                                                                                                                                                                                                                                                                                                                                                                                                                                                                                                                                                                                                                                                                                                                                                                                                                                                                                                                                                                                                                                                                                                                                                                                                                                                              | -7.33 | 35.71 | 2.40 | P | IN  |
| QL03348 | Dichlorobis(1,1,2,2,3,3,6,6-nonafluorohexyl)silane                                                 | 156323-66-9  | FC(F)(F)CCCl(F)(F)C(F)(F)C(F)(F)C(F)(F)C(F)(F)C(F)(F)CCCl(F)(F)F                                                                                                                                                                                                                                                                                                                                                                                                                                                                                                                                                                                                                                                                                                                                                                                                                                                                                                                                                                                                                                                                                                                                                                                                                                                                                                                                                                                                                                                                                                                                                                                                                                                                                                                                                                                                                                                                                                                                                                                                                                                                                                                                                                                                                                                                                                                                                                                                                                                                                                                                                                                                                                                                                                                                                                                                                                                                                                                                                                                                                                                                                                                                                                                                                                                                                                                                                                                                                                                                                                                                                                                                                                                                                                                                                                                                                                                                                                                                                                                                                                                                                                                                                                                                                                                                                                                                                                                                                                                                                                                                                                                                                                                                                                                                                                                                                                                                                                                                                                                                                                                                                                                                                                                                                                                                                                                                                                                                                                                                                                                                                                                                                                                                                                                          | -8.95 | 48.78 | 2.80 | P | IN  |
| QL03349 | Trichloro(1,1,2,2,3,3,6,6-nonafluorohexyl)silane                                                   | 78560-47-1   | FC(F)(F)CCCl(F)(F)C(F)(F)C(F)(F)C(F)(F)C(F)(F)CCl(Cl)Cl                                                                                                                                                                                                                                                                                                                                                                                                                                                                                                                                                                                                                                                                                                                                                                                                                                                                                                                                                                                                                                                                                                                                                                                                                                                                                                                                                                                                                                                                                                                                                                                                                                                                                                                                                                                                                                                                                                                                                                                                                                                                                                                                                                                                                                                                                                                                                                                                                                                                                                                                                                                                                                                                                                                                                                                                                                                                                                                                                                                                                                                                                                                                                                                                                                                                                                                                                                                                                                                                                                                                                                                                                                                                                                                                                                                                                                                                                                                                                                                                                                                                                                                                                                                                                                                                                                                                                                                                                                                                                                                                                                                                                                                                                                                                                                                                                                                                                                                                                                                                                                                                                                                                                                                                                                                                                                                                                                                                                                                                                                                                                                                                                                                                                                                                   | -7.76 | 52.17 | 2.17 | P | IN  |
| QL03350 | 1-Bromo-4-(1,1,2,2,3,3,4,4,5,5,6,6,7,7,10,10,10-heptadecafluorodecyl)benzene                       | 195324-88-0  | FC(F)(F)CCCC(F)(F)C(F)(F)C(F)(F)C(F)(F)C(F)(F)C(F)(F)C1=CC(Br)C=C1                                                                                                                                                                                                                                                                                                                                                                                                                                                                                                                                                                                                                                                                                                                                                                                                                                                                                                                                                                                                                                                                                                                                                                                                                                                                                                                                                                                                                                                                                                                                                                                                                                                                                                                                                                                                                                                                                                                                                                                                                                                                                                                                                                                                                                                                                                                                                                                                                                                                                                                                                                                                                                                                                                                                                                                                                                                                                                                                                                                                                                                                                                                                                                                                                                                                                                                                                                                                                                                                                                                                                                                                                                                                                                                                                                                                                                                                                                                                                                                                                                                                                                                                                                                                                                                                                                                                                                                                                                                                                                                                                                                                                                                                                                                                                                                                                                                                                                                                                                                                                                                                                                                                                                                                                                                                                                                                                                                                                                                                                                                                                                                                                                                                                                                        | -8.79 | 42.86 | 2.88 | P | IN  |
| QL03351 | 1,1,1,2,2,3,3,4,4,7,7-Dodecafluoroheptane                                                          | 503189-11-5  | FC(F)(F)CCC(F)(F)C(F)(F)C(F)(F)C(F)(F)F                                                                                                                                                                                                                                                                                                                                                                                                                                                                                                                                                                                                                                                                                                                                                                                                                                                                                                                                                                                                                                                                                                                                                                                                                                                                                                                                                                                                                                                                                                                                                                                                                                                                                                                                                                                                                                                                                                                                                                                                                                                                                                                                                                                                                                                                                                                                                                                                                                                                                                                                                                                                                                                                                                                                                                                                                                                                                                                                                                                                                                                                                                                                                                                                                                                                                                                                                                                                                                                                                                                                                                                                                                                                                                                                                                                                                                                                                                                                                                                                                                                                                                                                                                                                                                                                                                                                                                                                                                                                                                                                                                                                                                                                                                                                                                                                                                                                                                                                                                                                                                                                                                                                                                                                                                                                                                                                                                                                                                                                                                                                                                                                                                                                                                                                                   | -7.76 | 52.17 | 2.17 | P | IN  |
| QL03352 | 1,1,1,2,2,3,3,6,6-Decafluorohexane                                                                 | 188189-52-8  | FC(F)(F)CCC(F)(F)C(F)(F)C(F)(F)F                                                                                                                                                                                                                                                                                                                                                                                                                                                                                                                                                                                                                                                                                                                                                                                                                                                                                                                                                                                                                                                                                                                                                                                                                                                                                                                                                                                                                                                                                                                                                                                                                                                                                                                                                                                                                                                                                                                                                                                                                                                                                                                                                                                                                                                                                                                                                                                                                                                                                                                                                                                                                                                                                                                                                                                                                                                                                                                                                                                                                                                                                                                                                                                                                                                                                                                                                                                                                                                                                                                                                                                                                                                                                                                                                                                                                                                                                                                                                                                                                                                                                                                                                                                                                                                                                                                                                                                                                                                                                                                                                                                                                                                                                                                                                                                                                                                                                                                                                                                                                                                                                                                                                                                                                                                                                                                                                                                                                                                                                                                                                                                                                                                                                                                                                          | -7.06 | 50.00 | 1.91 | P | IN  |
| QL03353 | Poly(difluoromethylene), -alpha--[2-[(2-carboxyethyl)thio]ethyl]-.omega.-fluoro- lithium salt (11) | 65530-69-8   | FC(F)(F)CCSCCCC(O)=O                                                                                                                                                                                                                                                                                                                                                                                                                                                                                                                                                                                                                                                                                                                                                                                                                                                                                                                                                                                                                                                                                                                                                                                                                                                                                                                                                                                                                                                                                                                                                                                                                                                                                                                                                                                                                                                                                                                                                                                                                                                                                                                                                                                                                                                                                                                                                                                                                                                                                                                                                                                                                                                                                                                                                                                                                                                                                                                                                                                                                                                                                                                                                                                                                                                                                                                                                                                                                                                                                                                                                                                                                                                                                                                                                                                                                                                                                                                                                                                                                                                                                                                                                                                                                                                                                                                                                                                                                                                                                                                                                                                                                                                                                                                                                                                                                                                                                                                                                                                                                                                                                                                                                                                                                                                                                                                                                                                                                                                                                                                                                                                                                                                                                                                                                                      | -5.46 | 14.29 | 2.12 | P | OUT |
| QL03354 | [2-carboxyethyl]thio]ethyl]-.omega.-fluoro- (Zonyl 7950)                                           | 0165530-83-8 | FC(F)(F)COC(=N)C(F)(F)C(F)(F)C(F)(F)F                                                                                                                                                                                                                                                                                                                                                                                                                                                                                                                                                                                                                                                                                                                                                                                                                                                                                                                                                                                                                                                                                                                                                                                                                                                                                                                                                                                                                                                                                                                                                                                                                                                                                                                                                                                                                                                                                                                                                                                                                                                                                                                                                                                                                                                                                                                                                                                                                                                                                                                                                                                                                                                                                                                                                                                                                                                                                                                                                                                                                                                                                                                                                                                                                                                                                                                                                                                                                                                                                                                                                                                                                                                                                                                                                                                                                                                                                                                                                                                                                                                                                                                                                                                                                                                                                                                                                                                                                                                                                                                                                                                                                                                                                                                                                                                                                                                                                                                                                                                                                                                                                                                                                                                                                                                                                                                                                                                                                                                                                                                                                                                                                                                                                                                                                     | -7.47 | 47.62 | 2.16 | P | IN  |
| QL03355 | 2,2,2-Trifluoroethyl perfluorobutanimidate                                                         | 4078-29-9    | FC(F)(F)COC(=O)C(F)(F)C(F)(F)C(F)(F)F                                                                                                                                                                                                                                                                                                                                                                                                                                                                                                                                                                                                                                                                                                                                                                                                                                                                                                                                                                                                                                                                                                                                                                                                                                                                                                                                                                                                                                                                                                                                                                                                                                                                                                                                                                                                                                                                                                                                                                                                                                                                                                                                                                                                                                                                                                                                                                                                                                                                                                                                                                                                                                                                                                                                                                                                                                                                                                                                                                                                                                                                                                                                                                                                                                                                                                                                                                                                                                                                                                                                                                                                                                                                                                                                                                                                                                                                                                                                                                                                                                                                                                                                                                                                                                                                                                                                                                                                                                                                                                                                                                                                                                                                                                                                                                                                                                                                                                                                                                                                                                                                                                                                                                                                                                                                                                                                                                                                                                                                                                                                                                                                                                                                                                                                                     | -9.26 | 48.78 | 2.94 | P | IN  |
| QL03356 | 2,2,3,3,4,4,5,5,5-Nonafluoro-1-phenylpentyl bis(2,2,2-trifluoroethyl) phosphate                    | 344580-04-7  | FC(F)(F)COC(=O)CCC(F)(F)C(F)(F)C(F)(F)C(F)(F)C(F)(F)C(F)(F)F                                                                                                                                                                                                                                                                                                                                                                                                                                                                                                                                                                                                                                                                                                                                                                                                                                                                                                                                                                                                                                                                                                                                                                                                                                                                                                                                                                                                                                                                                                                                                                                                                                                                                                                                                                                                                                                                                                                                                                                                                                                                                                                                                                                                                                                                                                                                                                                                                                                                                                                                                                                                                                                                                                                                                                                                                                                                                                                                                                                                                                                                                                                                                                                                                                                                                                                                                                                                                                                                                                                                                                                                                                                                                                                                                                                                                                                                                                                                                                                                                                                                                                                                                                                                                                                                                                                                                                                                                                                                                                                                                                                                                                                                                                                                                                                                                                                                                                                                                                                                                                                                                                                                                                                                                                                                                                                                                                                                                                                                                                                                                                                                                                                                                                                              | -7.25 | 33.33 | 2.43 | P | OUT |
| QL03357 | 2,2,2-Trifluoroethyl perfluorobutanesulfonate                                                      | 100664-15-1  | FC(F)(F)COP(=O)(O)CC(F)(F)OC(C1CCCC1)C(F)(F)C(F)(F)C(F)(F)F                                                                                                                                                                                                                                                                                                                                                                                                                                                                                                                                                                                                                                                                                                                                                                                                                                                                                                                                                                                                                                                                                                                                                                                                                                                                                                                                                                                                                                                                                                                                                                                                                                                                                                                                                                                                                                                                                                                                                                                                                                                                                                                                                                                                                                                                                                                                                                                                                                                                                                                                                                                                                                                                                                                                                                                                                                                                                                                                                                                                                                                                                                                                                                                                                                                                                                                                                                                                                                                                                                                                                                                                                                                                                                                                                                                                                                                                                                                                                                                                                                                                                                                                                                                                                                                                                                                                                                                                                                                                                                                                                                                                                                                                                                                                                                                                                                                                                                                                                                                                                                                                                                                                                                                                                                                                                                                                                                                                                                                                                                                                                                                                                                                                                                                               | -7.78 | 50.00 | 2.23 | P | IN  |
| QL03358 | Perfluoro(N-methylmorpholine)                                                                      | 79963-95-4   | FC(F)(F)COS(=O)(=O)(O)C(F)(F)C(F)(F)C(F)(F)F                                                                                                                                                                                                                                                                                                                                                                                                                                                                                                                                                                                                                                                                                                                                                                                                                                                                                                                                                                                                                                                                                                                                                                                                                                                                                                                                                                                                                                                                                                                                                                                                                                                                                                                                                                                                                                                                                                                                                                                                                                                                                                                                                                                                                                                                                                                                                                                                                                                                                                                                                                                                                                                                                                                                                                                                                                                                                                                                                                                                                                                                                                                                                                                                                                                                                                                                                                                                                                                                                                                                                                                                                                                                                                                                                                                                                                                                                                                                                                                                                                                                                                                                                                                                                                                                                                                                                                                                                                                                                                                                                                                                                                                                                                                                                                                                                                                                                                                                                                                                                                                                                                                                                                                                                                                                                                                                                                                                                                                                                                                                                                                                                                                                                                                                              | -6.02 | 61.11 | 1.13 | P | OUT |
| QL03359 | 1,1,1,3,3,3-Hexafluoro-2-(trifluoromethoxy)-2-(trifluoromethyl)propane                             | 382-28-5     | FC(F)(F)N1C(F)(F)C(F)(F)OC(F)(F)C1(F)F                                                                                                                                                                                                                                                                                                                                                                                                                                                                                                                                                                                                                                                                                                                                                                                                                                                                                                                                                                                                                                                                                                                                                                                                                                                                                                                                                                                                                                                                                                                                                                                                                                                                                                                                                                                                                                                                                                                                                                                                                                                                                                                                                                                                                                                                                                                                                                                                                                                                                                                                                                                                                                                                                                                                                                                                                                                                                                                                                                                                                                                                                                                                                                                                                                                                                                                                                                                                                                                                                                                                                                                                                                                                                                                                                                                                                                                                                                                                                                                                                                                                                                                                                                                                                                                                                                                                                                                                                                                                                                                                                                                                                                                                                                                                                                                                                                                                                                                                                                                                                                                                                                                                                                                                                                                                                                                                                                                                                                                                                                                                                                                                                                                                                                                                                    | -6.02 | 61.11 | 1.13 | P | OUT |
| QL03360 | ether-substituted perfluoroalkyl (linear) carboxylic acids_i, n=1                                  | 681-08-3     | FC(F)(F)OC(C(F)(F)F)C(F)(F)C(F)(F)F                                                                                                                                                                                                                                                                                                                                                                                                                                                                                                                                                                                                                                                                                                                                                                                                                                                                                                                                                                                                                                                                                                                                                                                                                                                                                                                                                                                                                                                                                                                                                                                                                                                                                                                                                                                                                                                                                                                                                                                                                                                                                                                                                                                                                                                                                                                                                                                                                                                                                                                                                                                                                                                                                                                                                                                                                                                                                                                                                                                                                                                                                                                                                                                                                                                                                                                                                                                                                                                                                                                                                                                                                                                                                                                                                                                                                                                                                                                                                                                                                                                                                                                                                                                                                                                                                                                                                                                                                                                                                                                                                                                                                                                                                                                                                                                                                                                                                                                                                                                                                                                                                                                                                                                                                                                                                                                                                                                                                                                                                                                                                                                                                                                                                                                                                       | -6.53 | 66.67 | 1.22 | P | OUT |
| QL03361 | 3,4,4,4-Tetrafluoro-3-(trifluoromethoxy)-1-butene                                                  |              | FC(F)(F)OC(F)(F)C(F)(F)C(F)(F)C(F)(F)C(F)(F)C(F)(F)C(F)(F)C(F)(F)C(F)(F)C(F)(F)C(F)(F)C(F)(F)C(F)(F)C(F)(F)C(F)(F)C(F)(F)C(F)(F)C(F)(F)C(F)(F)C(F)(F)C(F)(F)C(F)(F)C(F)(F)C(F)(F)C(F)(F)C(F)(F)C(F)(F)C(F)(F)C(F)(F)C(F)(F)C(F)(F)C(F)(F)C(F)(F)C(F)(F)C(F)(F)C(F)(F)C(F)(F)C(F)(F)C(F)(F)C(F)(F)C(F)(F)C(F)(F)C(F)(F)C(F)(F)C(F)(F)C(F)(F)C(F)(F)C(F)(F)C(F)(F)C(F)(F)C(F)(F)C(F)(F)C(F)(F)C(F)(F)C(F)(F)C(F)(F)C(F)(F)C(F)(F)C(F)(F)C(F)(F)C(F)(F)C(F)(F)C(F)(F)C(F)(F)C(F)(F)C(F)(F)C(F)(F)C(F)(F)C(F)(F)C(F)(F)C(F)(F)C(F)(F)C(F)(F)C(F)(F)C(F)(F)C(F)(F)C(F)(F)C(F)(F)C(F)(F)C(F)(F)C(F)(F)C(F)(F)C(F)(F)C(F)(F)C(F)(F)C(F)(F)C(F)(F)C(F)(F)C(F)(F)C(F)(F)C(F)(F)C(F)(F)C(F)(F)C(F)(F)C(F)(F)C(F)(F)C(F)(F)C(F)(F)C(F)(F)C(F)(F)C(F)(F)C(F)(F)C(F)(F)C(F)(F)C(F)(F)C(F)(F)C(F)(F)C(F)(F)C(F)(F)C(F)(F)C(F)(F)C(F)(F)C(F)(F)C(F)(F)C(F)(F)C(F)(F)C(F)(F)C(F)(F)C(F)(F)C(F)(F)C(F)(F)C(F)(F)C(F)(F)C(F)(F)C(F)(F)C(F)(F)C(F)(F)C(F)(F)C(F)(F)C(F)(F)C(F)(F)C(F)(F)C(F)(F)C(F)(F)C(F)(F)C(F)(F)C(F)(F)C(F)(F)C(F)(F)C(F)(F)C(F)(F)C(F)(F)C(F)(F)C(F)(F)C(F)(F)C(F)(F)C(F)(F)C(F)(F)C(F)(F)C(F)(F)C(F)(F)C(F)(F)C(F)(F)C(F)(F)C(F)(F)C(F)(F)C(F)(F)C(F)(F)C(F)(F)C(F)(F)C(F)(F)C(F)(F)C(F)(F)C(F)(F)C(F)(F)C(F)(F)C(F)(F)C(F)(F)C(F)(F)C(F)(F)C(F)(F)C(F)(F)C(F)(F)C(F)(F)C(F)(F)C(F)(F)C(F)(F)C(F)(F)C(F)(F)C(F)(F)C(F)(F)C(F)(F)C(F)(F)C(F)(F)C(F)(F)C(F)(F)C(F)(F)C(F)(F)C(F)(F)C(F)(F)C(F)(F)C(F)(F)C(F)(F)C(F)(F)C(F)(F)C(F)(F)C(F)(F)C(F)(F)C(F)(F)C(F)(F)C(F)(F)C(F)(F)C(F)(F)C(F)(F)C(F)(F)C(F)(F)C(F)(F)C(F)(F)C(F)(F)C(F)(F)C(F)(F)C(F)(F)C(F)(F)C(F)(F)C(F)(F)C(F)(F)C(F)(F)C(F)(F)C(F)(F)C(F)(F)C(F)(F)C(F)(F)C(F)(F)C(F)(F)C(F)(F)C(F)(F)C(F)(F)C(F)(F)C(F)(F)C(F)(F)C(F)(F)C(F)(F)C(F)(F)C(F)(F)C(F)(F)C(F)(F)C(F)(F)C(F)(F)C(F)(F)C(F)(F)C(F)(F)C(F)(F)C(F)(F)C(F)(F)C(F)(F)C(F)(F)C(F)(F)C(F)(F)C(F)(F)C(F)(F)C(F)(F)C(F)(F)C(F)(F)C(F)(F)C(F)(F)C(F)(F)C(F)(F)C(F)(F)C(F)(F)C(F)(F)C(F)(F)C(F)(F)C(F)(F)C(F)(F)C(F)(F)C(F)(F)C(F)(F)C(F)(F)C(F)(F)C(F)(F)C(F)(F)C(F)(F)C(F)(F)C(F)(F)C(F)(F)C(F)(F)C(F)(F)C(F)(F)C(F)(F)C(F)(F)C(F)(F)C(F)(F)C(F)(F)C(F)(F)C(F)(F)C(F)(F)C(F)(F)C(F)(F)C(F)(F)C(F)(F)C(F)(F)C(F)(F)C(F)(F)C(F)(F)C(F)(F)C(F)(F)C(F)(F)C(F)(F)C(F)(F)C(F)(F)C(F)(F)C(F)(F)C(F)(F)C(F)(F)C(F)(F)C(F)(F)C(F)(F)C(F)(F)C(F)(F)C(F)(F)C(F)(F)C(F)(F)C(F)(F)C(F)(F)C(F)(F)C(F)(F)C(F)(F)C(F)(F)C(F)(F)C(F)(F)C(F)(F)C(F)(F)C(F)(F)C(F)(F)C(F)(F)C(F)(F)C(F)(F)C(F)(F)C(F)(F)C(F)(F)C(F)(F)C(F)(F)C(F)(F)C(F)(F)C(F)(F)C(F)(F)C(F)(F)C(F)(F)C(F)(F)C(F)(F)C(F)(F)C(F)(F)C(F)(F)C(F)(F)C(F)(F)C(F)(F)C(F)(F)C(F)(F)C(F)(F)C(F)(F)C(F)(F)C(F)(F)C(F)(F)C(F)(F)C(F)(F)C(F)(F)C(F)(F)C(F)(F)C(F)(F)C(F)(F)C(F)(F)C(F)(F)C(F)(F)C(F)(F)C(F)(F)C(F)(F)C(F)(F)C(F)(F)C(F)(F)C(F)(F)C(F)(F)C(F)(F)C(F)(F)C(F)(F)C(F)(F)C(F)(F)C(F)(F)C(F)(F)C(F)(F)C(F)(F)C(F)(F)C(F)(F)C(F)(F)C(F)(F)C(F)(F)C(F)(F)C(F)(F)C(F)(F)C(F)(F)C(F)(F)C(F)(F)C(F)(F)C(F)(F)C(F)(F)C(F)(F)C(F)(F)C(F)(F)C(F)(F)C(F)(F)C(F)(F)C(F)(F)C(F)(F)C(F)(F)C(F)(F)C(F)(F)C(F)(F)C(F)(F)C(F)(F)C(F)(F)C(F)(F)C(F)(F)C(F)(F)C(F)(F)C(F)(F)C(F)(F)C(F)(F)C(F)(F)C(F)(F)C(F)(F)C(F)(F)C(F)(F)C(F)(F)C(F)(F)C(F)(F)C(F)(F)C(F)(F)C(F)(F)C(F)(F)C(F)(F)C(F)(F)C(F)(F)C(F)(F)C(F)(F)C(F)(F)C(F)(F)C(F)(F)C(F)(F)C(F)(F)C(F)(F)C(F)(F)C(F)(F)C(F)(F)C(F)(F)C(F)(F)C(F)(F)C(F)(F)C(F)(F)C(F)(F)C(F)(F)C(F)(F)C(F)(F)C(F)(F)C(F)(F)C(F)(F)C(F)(F)C(F)(F)C(F)(F)C(F)(F)C(F)(F)C(F)(F)C(F)(F)C(F)(F)C(F)(F)C(F)(F)C(F)(F)C(F)(F)C(F)(F)C(F)(F)C(F)(F)C(F)(F)C(F)(F)C(F)(F)C(F)(F)C(F)(F)C(F)(F)C(F)(F)C(F)(F)C(F)(F)C(F)(F)C(F)(F)C(F)(F)C(F)(F)C(F)(F)C(F)(F)C(F)(F)C(F)(F)C(F)(F)C(F)(F)C(F)(F)C(F)(F)C(F)(F)C(F)(F)C(F)(F)C(F)(F)C(F)(F)C(F)(F)C(F)(F)C(F)(F)C(F)(F)C(F)(F)C(F)(F)C(F)(F)C(F)(F)C(F)(F)C(F)(F)C(F)(F)C(F)(F)C(F)(F)C(F)(F)C(F)(F)C(F)(F)C(F)(F)C(F)(F)C(F)(F)C(F)(F)C(F)(F)C(F)(F)C(F)(F)C(F)(F)C(F)(F)C(F)(F)C(F)(F)C(F)(F)C(F)(F)C(F)(F)C(F)(F)C(F)(F)C(F)(F)C(F)(F)C(F)(F)C(F)(F)C(F)(F)C(F)(F)C(F)(F)C(F)(F)C(F)(F)C(F)(F)C(F)(F)C(F)(F)C(F)(F)C(F)(F)C(F)(F)C(F)(F)C(F)(F)C(F)(F)C(F)(F)C(F)(F)C(F)(F)C(F)(F)C(F)(F)C(F)(F)C(F)(F)C(F)(F)C(F)(F)C(F)(F)C(F)(F)C(F)(F)C(F)(F)C(F)(F)C(F)(F)C(F)(F)C(F)(F)C(F)(F)C(F)(F)C(F)(F)C(F)(F)C(F)(F)C(F)(F)C(F)(F)C(F)(F)C(F)(F)C(F)(F)C(F)(F)C(F)(F)C(F)(F)C(F)(F)C(F)(F)C(F)(F)C(F)(F)C(F)(F)C(F)(F)C(F)(F)C(F)(F)C(F)(F)C(F)(F)C(F)(F)C(F)(F)C(F)(F)C(F)(F)C(F)(F)C(F)(F)C(F)(F)C(F)(F)C(F)(F)C(F)(F)C(F)(F)C(F)(F)C(F)(F)C(F)(F)C(F)(F)C(F)(F)C(F)(F)C(F)(F)C(F)(F)C(F)(F)C(F)(F)C(F)(F)C(F)(F)C(F)(F)C(F)(F)C(F)(F)C(F)(F)C(F)(F)C(F)(F)C(F)(F)C(F)(F)C(F)(F)C(F)(F)C(F)(F)C(F)(F)C(F)(F)C(F)(F)C(F)(F)C(F)(F)C(F)(F)C(F)(F)C(F)(F)C(F)(F)C(F)(F)C(F)(F)C(F)(F)C(F)(F)C(F)(F)C(F)(F)C(F)(F)C(F)(F)C(F)(F)C(F)(F)C(F)(F)C(F)(F)C(F)(F)C(F)(F)C(F)(F)C(F)(F)C(F)(F)C(F)(F)C(F)(F)C(F)(F)C(F)(F)C(F)(F)C(F)(F)C(F)(F)C(F)(F)C(F)(F)C(F)(F)C(F)(F)C(F)(F)C(F)(F)C(F)(F)C(F)(F)C(F)(F)C(F)(F)C(F)(F)C(F)(F)C(F)(F)C(F)(F)C(F)(F)C(F)(F)C(F)(F)C(F)(F)C(F)(F)C(F)(F)C(F)(F)C(F)(F)C(F)(F)C(F)(F)C(F)(F)C(F)(F)C(F)(F)C(F)(F)C(F)(F)C(F)(F)C(F)(F)C(F)(F)C(F)(F)C(F)(F)C(F)(F)C(F)(F)C(F)(F)C(F)(F)C(F)(F)C(F)(F)C(F)(F)C(F)(F)C(F)(F)C(F)(F)C(F)(F)C(F)(F)C(F)(F)C(F)(F)C(F)(F)C(F)(F)C(F)(F)C(F)(F)C(F)(F)C(F)(F)C(F)(F)C(F)(F)C(F)(F)C(F)(F)C(F)(F)C(F)(F)C(F)(F)C(F)(F)C(F)(F)C(F)(F)C(F)(F)C(F)(F)C(F)(F)C(F)(F)C(F)(F)C(F)(F)C(F)(F)C(F)(F)C(F)(F)C(F)(F)C(F)(F)C(F)(F)C(F)(F)C(F)(F)C(F)(F)C(F)(F)C(F)(F)C(F)(F)C(F)(F)C(F)(F)C(F)(F)C(F)(F)C(F)(F)C(F)(F)C(F)(F)C(F)(F)C(F)(F)C(F)(F)C(F)(F)C(F)(F)C(F)(F)C(F)(F)C(F)(F)C(F)(F)C(F)(F)C(F)(F)C(F)(F)C(F)(F)C(F)(F)C(F)(F)C(F)(F)C(F)(F)C(F)(F)C(F)(F)C(F)(F)C(F)(F)C(F)(F)C(F)(F)C(F)(F)C(F)(F)C(F)(F)C(F)(F)C(F)(F)C(F)(F)C(F)(F)C(F)(F)C(F)(F)C(F)(F)C(F)(F)C(F)(F)C(F)(F)C(F)(F)C(F)(F)C(F)(F)C(F)(F)C(F)(F)C(F)(F)C(F)(F)C(F)(F)C(F)(F)C(F)(F)C(F)(F)C(F)(F)C(F)(F)C(F)(F)C(F)(F)C(F)(F)C |       |       |      |   |     |



[illegible]



[illegible]

|         |                                                                                                                                             |             |                                                                                                                                                                                                                                                                                                                                                                                                                                                                                                                                                                                                                                                                                                                                                                                                                                                                                                                                                                                                                                                                                                                                                                                                                                                                                                                                                                                                                                                                                                                                                                                                                                                                                                                                                                                                                                                                                                                                                                                                                                                                                                                                                                                                                                                                                                                                                                                                                                                                                                                                                                                                                                                                                                                                                                                                                                                                                                                                                                                                                                                                                                                                                                                                                                                                                                                                                                                                                                                                                                                                                                                                                                                                                                                                                                                                                                                                                                                                                                                                                                                                                                                                                                                                                                                                                                                                                                                                                                                                                                                                                                                                                                                                                                                                                                                                                                                                                                                                                                                                                                                                                                                                                                                                                                                                                          |       |       |      |   |     |
|---------|---------------------------------------------------------------------------------------------------------------------------------------------|-------------|------------------------------------------------------------------------------------------------------------------------------------------------------------------------------------------------------------------------------------------------------------------------------------------------------------------------------------------------------------------------------------------------------------------------------------------------------------------------------------------------------------------------------------------------------------------------------------------------------------------------------------------------------------------------------------------------------------------------------------------------------------------------------------------------------------------------------------------------------------------------------------------------------------------------------------------------------------------------------------------------------------------------------------------------------------------------------------------------------------------------------------------------------------------------------------------------------------------------------------------------------------------------------------------------------------------------------------------------------------------------------------------------------------------------------------------------------------------------------------------------------------------------------------------------------------------------------------------------------------------------------------------------------------------------------------------------------------------------------------------------------------------------------------------------------------------------------------------------------------------------------------------------------------------------------------------------------------------------------------------------------------------------------------------------------------------------------------------------------------------------------------------------------------------------------------------------------------------------------------------------------------------------------------------------------------------------------------------------------------------------------------------------------------------------------------------------------------------------------------------------------------------------------------------------------------------------------------------------------------------------------------------------------------------------------------------------------------------------------------------------------------------------------------------------------------------------------------------------------------------------------------------------------------------------------------------------------------------------------------------------------------------------------------------------------------------------------------------------------------------------------------------------------------------------------------------------------------------------------------------------------------------------------------------------------------------------------------------------------------------------------------------------------------------------------------------------------------------------------------------------------------------------------------------------------------------------------------------------------------------------------------------------------------------------------------------------------------------------------------------------------------------------------------------------------------------------------------------------------------------------------------------------------------------------------------------------------------------------------------------------------------------------------------------------------------------------------------------------------------------------------------------------------------------------------------------------------------------------------------------------------------------------------------------------------------------------------------------------------------------------------------------------------------------------------------------------------------------------------------------------------------------------------------------------------------------------------------------------------------------------------------------------------------------------------------------------------------------------------------------------------------------------------------------------------------------------------------------------------------------------------------------------------------------------------------------------------------------------------------------------------------------------------------------------------------------------------------------------------------------------------------------------------------------------------------------------------------------------------------------------------------------------------------------|-------|-------|------|---|-----|
| QL0353  | 1,2-Dichloroperfluorocyclohexene                                                                                                            | 336-19-6    | FC1(F)C(Cl)=C(Cl)C(F)C(F)C(F)C1(F)F                                                                                                                                                                                                                                                                                                                                                                                                                                                                                                                                                                                                                                                                                                                                                                                                                                                                                                                                                                                                                                                                                                                                                                                                                                                                                                                                                                                                                                                                                                                                                                                                                                                                                                                                                                                                                                                                                                                                                                                                                                                                                                                                                                                                                                                                                                                                                                                                                                                                                                                                                                                                                                                                                                                                                                                                                                                                                                                                                                                                                                                                                                                                                                                                                                                                                                                                                                                                                                                                                                                                                                                                                                                                                                                                                                                                                                                                                                                                                                                                                                                                                                                                                                                                                                                                                                                                                                                                                                                                                                                                                                                                                                                                                                                                                                                                                                                                                                                                                                                                                                                                                                                                                                                                                                                      | -5.70 | 62.50 | 0.95 | P | OUT |
| QL03538 | Perfluorocyclohexanecarbonyl bromide                                                                                                        | 261761-76-6 | FC1(F)C(F)(F)C(F)C(F)C(F)C(F)C(=O)Br                                                                                                                                                                                                                                                                                                                                                                                                                                                                                                                                                                                                                                                                                                                                                                                                                                                                                                                                                                                                                                                                                                                                                                                                                                                                                                                                                                                                                                                                                                                                                                                                                                                                                                                                                                                                                                                                                                                                                                                                                                                                                                                                                                                                                                                                                                                                                                                                                                                                                                                                                                                                                                                                                                                                                                                                                                                                                                                                                                                                                                                                                                                                                                                                                                                                                                                                                                                                                                                                                                                                                                                                                                                                                                                                                                                                                                                                                                                                                                                                                                                                                                                                                                                                                                                                                                                                                                                                                                                                                                                                                                                                                                                                                                                                                                                                                                                                                                                                                                                                                                                                                                                                                                                                                                                     | -6.62 | 60.00 | 1.44 | P | OUT |
| QL03539 | Chloroperfluorocyclohexane                                                                                                                  | 336-15-2    | FC1(F)C(F)(F)C(F)C(F)C(F)C(Cl)C(F)C(F)C1(F)F                                                                                                                                                                                                                                                                                                                                                                                                                                                                                                                                                                                                                                                                                                                                                                                                                                                                                                                                                                                                                                                                                                                                                                                                                                                                                                                                                                                                                                                                                                                                                                                                                                                                                                                                                                                                                                                                                                                                                                                                                                                                                                                                                                                                                                                                                                                                                                                                                                                                                                                                                                                                                                                                                                                                                                                                                                                                                                                                                                                                                                                                                                                                                                                                                                                                                                                                                                                                                                                                                                                                                                                                                                                                                                                                                                                                                                                                                                                                                                                                                                                                                                                                                                                                                                                                                                                                                                                                                                                                                                                                                                                                                                                                                                                                                                                                                                                                                                                                                                                                                                                                                                                                                                                                                                             | -5.86 | 66.67 | 0.92 | P | OUT |
| QL03540 | (Perfluorocyclohexyl)methyl prop-2-enolate                                                                                                  | 40677-94-9  | FC1(F)C(F)C(F)C(F)C(F)C(F)COC(=O)C=C)C(F)C1(F)F                                                                                                                                                                                                                                                                                                                                                                                                                                                                                                                                                                                                                                                                                                                                                                                                                                                                                                                                                                                                                                                                                                                                                                                                                                                                                                                                                                                                                                                                                                                                                                                                                                                                                                                                                                                                                                                                                                                                                                                                                                                                                                                                                                                                                                                                                                                                                                                                                                                                                                                                                                                                                                                                                                                                                                                                                                                                                                                                                                                                                                                                                                                                                                                                                                                                                                                                                                                                                                                                                                                                                                                                                                                                                                                                                                                                                                                                                                                                                                                                                                                                                                                                                                                                                                                                                                                                                                                                                                                                                                                                                                                                                                                                                                                                                                                                                                                                                                                                                                                                                                                                                                                                                                                                                                          | -7.03 | 39.29 | 2.17 | P | IN  |
| QL03541 | Perfluorocyclohexane                                                                                                                        | 355-68-8    | FC1(F)C(F)C(F)C(F)C(F)C(F)C(F)C1(F)F                                                                                                                                                                                                                                                                                                                                                                                                                                                                                                                                                                                                                                                                                                                                                                                                                                                                                                                                                                                                                                                                                                                                                                                                                                                                                                                                                                                                                                                                                                                                                                                                                                                                                                                                                                                                                                                                                                                                                                                                                                                                                                                                                                                                                                                                                                                                                                                                                                                                                                                                                                                                                                                                                                                                                                                                                                                                                                                                                                                                                                                                                                                                                                                                                                                                                                                                                                                                                                                                                                                                                                                                                                                                                                                                                                                                                                                                                                                                                                                                                                                                                                                                                                                                                                                                                                                                                                                                                                                                                                                                                                                                                                                                                                                                                                                                                                                                                                                                                                                                                                                                                                                                                                                                                                                     | -5.86 | 66.67 | 0.92 | P | OUT |
| QL03542 | Piperidine, 2,2,3,4,4,5,5,6,6-decafluoro-1-(pentafluoroethyl)-                                                                              | 564-11-4    | FC1(F)C(F)C(F)C(F)C(F)C(F)C(N(C(F)C(F)C(F)F)F)F                                                                                                                                                                                                                                                                                                                                                                                                                                                                                                                                                                                                                                                                                                                                                                                                                                                                                                                                                                                                                                                                                                                                                                                                                                                                                                                                                                                                                                                                                                                                                                                                                                                                                                                                                                                                                                                                                                                                                                                                                                                                                                                                                                                                                                                                                                                                                                                                                                                                                                                                                                                                                                                                                                                                                                                                                                                                                                                                                                                                                                                                                                                                                                                                                                                                                                                                                                                                                                                                                                                                                                                                                                                                                                                                                                                                                                                                                                                                                                                                                                                                                                                                                                                                                                                                                                                                                                                                                                                                                                                                                                                                                                                                                                                                                                                                                                                                                                                                                                                                                                                                                                                                                                                                                                          | -7.96 | 65.22 | 1.91 | P | OUT |
| QL03543 | Decafluorocyclopentane                                                                                                                      | 376-77-2    | FC1(F)C(F)C(F)C(F)C(F)C1(F)F                                                                                                                                                                                                                                                                                                                                                                                                                                                                                                                                                                                                                                                                                                                                                                                                                                                                                                                                                                                                                                                                                                                                                                                                                                                                                                                                                                                                                                                                                                                                                                                                                                                                                                                                                                                                                                                                                                                                                                                                                                                                                                                                                                                                                                                                                                                                                                                                                                                                                                                                                                                                                                                                                                                                                                                                                                                                                                                                                                                                                                                                                                                                                                                                                                                                                                                                                                                                                                                                                                                                                                                                                                                                                                                                                                                                                                                                                                                                                                                                                                                                                                                                                                                                                                                                                                                                                                                                                                                                                                                                                                                                                                                                                                                                                                                                                                                                                                                                                                                                                                                                                                                                                                                                                                                             | -5.86 | 66.67 | 0.92 | P | OUT |
| QL03544 | (Perfluorocyclopentyl)phenyldiazene                                                                                                         | 97388-28-8  | FC1(F)C(F)C(F)C(F)C(F)C(N=C(N=C)C=C)C1(F)F                                                                                                                                                                                                                                                                                                                                                                                                                                                                                                                                                                                                                                                                                                                                                                                                                                                                                                                                                                                                                                                                                                                                                                                                                                                                                                                                                                                                                                                                                                                                                                                                                                                                                                                                                                                                                                                                                                                                                                                                                                                                                                                                                                                                                                                                                                                                                                                                                                                                                                                                                                                                                                                                                                                                                                                                                                                                                                                                                                                                                                                                                                                                                                                                                                                                                                                                                                                                                                                                                                                                                                                                                                                                                                                                                                                                                                                                                                                                                                                                                                                                                                                                                                                                                                                                                                                                                                                                                                                                                                                                                                                                                                                                                                                                                                                                                                                                                                                                                                                                                                                                                                                                                                                                                                               | -6.59 | 33.33 | 2.13 | P | IN  |
| QL03545 | Octafluorocyclobutane                                                                                                                       | 115-25-3    | FC1(F)C(F)C(F)C(F)C(F)C1(F)F                                                                                                                                                                                                                                                                                                                                                                                                                                                                                                                                                                                                                                                                                                                                                                                                                                                                                                                                                                                                                                                                                                                                                                                                                                                                                                                                                                                                                                                                                                                                                                                                                                                                                                                                                                                                                                                                                                                                                                                                                                                                                                                                                                                                                                                                                                                                                                                                                                                                                                                                                                                                                                                                                                                                                                                                                                                                                                                                                                                                                                                                                                                                                                                                                                                                                                                                                                                                                                                                                                                                                                                                                                                                                                                                                                                                                                                                                                                                                                                                                                                                                                                                                                                                                                                                                                                                                                                                                                                                                                                                                                                                                                                                                                                                                                                                                                                                                                                                                                                                                                                                                                                                                                                                                                                             | -5.86 | 66.67 | 0.92 | P | OUT |
| QL03546 | Tetracosafuorotetradecahydrophenanthrene                                                                                                    | 306-91-2    | FC1(F)C(F)C(F)C(F)C2(F)C(F)C1(F)C(F)C(F)C(F)C(F)C(F)C2(F)C21                                                                                                                                                                                                                                                                                                                                                                                                                                                                                                                                                                                                                                                                                                                                                                                                                                                                                                                                                                                                                                                                                                                                                                                                                                                                                                                                                                                                                                                                                                                                                                                                                                                                                                                                                                                                                                                                                                                                                                                                                                                                                                                                                                                                                                                                                                                                                                                                                                                                                                                                                                                                                                                                                                                                                                                                                                                                                                                                                                                                                                                                                                                                                                                                                                                                                                                                                                                                                                                                                                                                                                                                                                                                                                                                                                                                                                                                                                                                                                                                                                                                                                                                                                                                                                                                                                                                                                                                                                                                                                                                                                                                                                                                                                                                                                                                                                                                                                                                                                                                                                                                                                                                                                                                                             | -8.20 | 63.16 | 2.08 | P | IN  |
| QL03547 | Perflunafene                                                                                                                                | 306-94-5    | FC1(F)C(F)C(F)C(F)C2(F)C(F)C(F)C(F)C(F)C2(F)C1(F)F                                                                                                                                                                                                                                                                                                                                                                                                                                                                                                                                                                                                                                                                                                                                                                                                                                                                                                                                                                                                                                                                                                                                                                                                                                                                                                                                                                                                                                                                                                                                                                                                                                                                                                                                                                                                                                                                                                                                                                                                                                                                                                                                                                                                                                                                                                                                                                                                                                                                                                                                                                                                                                                                                                                                                                                                                                                                                                                                                                                                                                                                                                                                                                                                                                                                                                                                                                                                                                                                                                                                                                                                                                                                                                                                                                                                                                                                                                                                                                                                                                                                                                                                                                                                                                                                                                                                                                                                                                                                                                                                                                                                                                                                                                                                                                                                                                                                                                                                                                                                                                                                                                                                                                                                                                       | -7.63 | 64.29 | 1.79 | P | OUT |
| QL03548 | 4,4,5,5,6,6-hexafluoro-1,3,2-dithiazine 1,1,3,3-tetraoxide                                                                                  | 84246-29-7  | FC1(F)C(F)C(F)S(=O)(=O)NS(=O)(=O)C1(F)F                                                                                                                                                                                                                                                                                                                                                                                                                                                                                                                                                                                                                                                                                                                                                                                                                                                                                                                                                                                                                                                                                                                                                                                                                                                                                                                                                                                                                                                                                                                                                                                                                                                                                                                                                                                                                                                                                                                                                                                                                                                                                                                                                                                                                                                                                                                                                                                                                                                                                                                                                                                                                                                                                                                                                                                                                                                                                                                                                                                                                                                                                                                                                                                                                                                                                                                                                                                                                                                                                                                                                                                                                                                                                                                                                                                                                                                                                                                                                                                                                                                                                                                                                                                                                                                                                                                                                                                                                                                                                                                                                                                                                                                                                                                                                                                                                                                                                                                                                                                                                                                                                                                                                                                                                                                  | -4.82 | 35.29 | 1.27 | P | IN  |
| QL03549 | 1H,2H-Hexafluorocyclopentene                                                                                                                | 1005-73-8   | FC1(F)C=C(CC(F)F)C1(F)F                                                                                                                                                                                                                                                                                                                                                                                                                                                                                                                                                                                                                                                                                                                                                                                                                                                                                                                                                                                                                                                                                                                                                                                                                                                                                                                                                                                                                                                                                                                                                                                                                                                                                                                                                                                                                                                                                                                                                                                                                                                                                                                                                                                                                                                                                                                                                                                                                                                                                                                                                                                                                                                                                                                                                                                                                                                                                                                                                                                                                                                                                                                                                                                                                                                                                                                                                                                                                                                                                                                                                                                                                                                                                                                                                                                                                                                                                                                                                                                                                                                                                                                                                                                                                                                                                                                                                                                                                                                                                                                                                                                                                                                                                                                                                                                                                                                                                                                                                                                                                                                                                                                                                                                                                                                                  | -5.56 | 46.15 | 1.32 | P | IN  |
| QL03550 | Perfluoroperhydrofluorene                                                                                                                   | 307-08-4    | FC1(F)C2(F)C(F)C3(F)C1(F)C(F)C(F)C(F)C3(F)C(F)C(F)C(F)C2(F)F                                                                                                                                                                                                                                                                                                                                                                                                                                                                                                                                                                                                                                                                                                                                                                                                                                                                                                                                                                                                                                                                                                                                                                                                                                                                                                                                                                                                                                                                                                                                                                                                                                                                                                                                                                                                                                                                                                                                                                                                                                                                                                                                                                                                                                                                                                                                                                                                                                                                                                                                                                                                                                                                                                                                                                                                                                                                                                                                                                                                                                                                                                                                                                                                                                                                                                                                                                                                                                                                                                                                                                                                                                                                                                                                                                                                                                                                                                                                                                                                                                                                                                                                                                                                                                                                                                                                                                                                                                                                                                                                                                                                                                                                                                                                                                                                                                                                                                                                                                                                                                                                                                                                                                                                                             | -7.87 | 62.86 | 1.93 | P | IN  |
| QL03551 | 2,2,3,3-Tetrafluorooxetane                                                                                                                  | 765-63-9    | FC1(F)COC1(F)F                                                                                                                                                                                                                                                                                                                                                                                                                                                                                                                                                                                                                                                                                                                                                                                                                                                                                                                                                                                                                                                                                                                                                                                                                                                                                                                                                                                                                                                                                                                                                                                                                                                                                                                                                                                                                                                                                                                                                                                                                                                                                                                                                                                                                                                                                                                                                                                                                                                                                                                                                                                                                                                                                                                                                                                                                                                                                                                                                                                                                                                                                                                                                                                                                                                                                                                                                                                                                                                                                                                                                                                                                                                                                                                                                                                                                                                                                                                                                                                                                                                                                                                                                                                                                                                                                                                                                                                                                                                                                                                                                                                                                                                                                                                                                                                                                                                                                                                                                                                                                                                                                                                                                                                                                                                                           | -4.09 | 40.00 | 0.81 | P | OUT |
| QL03552 | Perfluoro[oxacyclopentane]                                                                                                                  | 773-14-8    | FC1(F)OC(F)C(F)C(F)C1(F)F                                                                                                                                                                                                                                                                                                                                                                                                                                                                                                                                                                                                                                                                                                                                                                                                                                                                                                                                                                                                                                                                                                                                                                                                                                                                                                                                                                                                                                                                                                                                                                                                                                                                                                                                                                                                                                                                                                                                                                                                                                                                                                                                                                                                                                                                                                                                                                                                                                                                                                                                                                                                                                                                                                                                                                                                                                                                                                                                                                                                                                                                                                                                                                                                                                                                                                                                                                                                                                                                                                                                                                                                                                                                                                                                                                                                                                                                                                                                                                                                                                                                                                                                                                                                                                                                                                                                                                                                                                                                                                                                                                                                                                                                                                                                                                                                                                                                                                                                                                                                                                                                                                                                                                                                                                                                | -5.66 | 61.54 | 0.96 | P | OUT |
| QL03553 | Perfluoro-15-crown-5-ether                                                                                                                  | 97571-69-2  | FC1(F)OC(F)C(F)C(F)OC(F)C(F)C(F)OC(F)C(F)C(F)OC1(F)F                                                                                                                                                                                                                                                                                                                                                                                                                                                                                                                                                                                                                                                                                                                                                                                                                                                                                                                                                                                                                                                                                                                                                                                                                                                                                                                                                                                                                                                                                                                                                                                                                                                                                                                                                                                                                                                                                                                                                                                                                                                                                                                                                                                                                                                                                                                                                                                                                                                                                                                                                                                                                                                                                                                                                                                                                                                                                                                                                                                                                                                                                                                                                                                                                                                                                                                                                                                                                                                                                                                                                                                                                                                                                                                                                                                                                                                                                                                                                                                                                                                                                                                                                                                                                                                                                                                                                                                                                                                                                                                                                                                                                                                                                                                                                                                                                                                                                                                                                                                                                                                                                                                                                                                                                                     | -5.46 | 57.14 | 0.99 | P | OUT |
| QL03554 | 6-isocyanato-2,4,4-tetrafluoro-1,3-benzodioxene                                                                                             | 26030-46-6  | FC1(F)OC2=C(C=C)C=N=C=C)C(F)FO1                                                                                                                                                                                                                                                                                                                                                                                                                                                                                                                                                                                                                                                                                                                                                                                                                                                                                                                                                                                                                                                                                                                                                                                                                                                                                                                                                                                                                                                                                                                                                                                                                                                                                                                                                                                                                                                                                                                                                                                                                                                                                                                                                                                                                                                                                                                                                                                                                                                                                                                                                                                                                                                                                                                                                                                                                                                                                                                                                                                                                                                                                                                                                                                                                                                                                                                                                                                                                                                                                                                                                                                                                                                                                                                                                                                                                                                                                                                                                                                                                                                                                                                                                                                                                                                                                                                                                                                                                                                                                                                                                                                                                                                                                                                                                                                                                                                                                                                                                                                                                                                                                                                                                                                                                                                          | -6.10 | 20.00 | 2.26 | P | OUT |
| QL03555 | Tetrafluoroethane beta-sultone                                                                                                              | 697-18-7    | FC1(F)OS(=O)(=O)C1(F)F                                                                                                                                                                                                                                                                                                                                                                                                                                                                                                                                                                                                                                                                                                                                                                                                                                                                                                                                                                                                                                                                                                                                                                                                                                                                                                                                                                                                                                                                                                                                                                                                                                                                                                                                                                                                                                                                                                                                                                                                                                                                                                                                                                                                                                                                                                                                                                                                                                                                                                                                                                                                                                                                                                                                                                                                                                                                                                                                                                                                                                                                                                                                                                                                                                                                                                                                                                                                                                                                                                                                                                                                                                                                                                                                                                                                                                                                                                                                                                                                                                                                                                                                                                                                                                                                                                                                                                                                                                                                                                                                                                                                                                                                                                                                                                                                                                                                                                                                                                                                                                                                                                                                                                                                                                                                   | -5.29 | 40.00 | 1.36 | P | IN  |
| QL03556 | 2,2,4,4-Tetrafluoro-1,3-dithietane                                                                                                          | 1717-50-6   | FC1(F)SC(F)FS1                                                                                                                                                                                                                                                                                                                                                                                                                                                                                                                                                                                                                                                                                                                                                                                                                                                                                                                                                                                                                                                                                                                                                                                                                                                                                                                                                                                                                                                                                                                                                                                                                                                                                                                                                                                                                                                                                                                                                                                                                                                                                                                                                                                                                                                                                                                                                                                                                                                                                                                                                                                                                                                                                                                                                                                                                                                                                                                                                                                                                                                                                                                                                                                                                                                                                                                                                                                                                                                                                                                                                                                                                                                                                                                                                                                                                                                                                                                                                                                                                                                                                                                                                                                                                                                                                                                                                                                                                                                                                                                                                                                                                                                                                                                                                                                                                                                                                                                                                                                                                                                                                                                                                                                                                                                                           | -6.17 | 50.00 | 1.50 | P | IN  |
| QL03557 | 2,2,3,4,4,5,5,6-Decafluoro-1-(trifluoromethyl)piperidine                                                                                    | 359-71-7    | FC1(N(C(F)C(F)C(F)C1(F)F)C(F)C(F)C(F)F)F                                                                                                                                                                                                                                                                                                                                                                                                                                                                                                                                                                                                                                                                                                                                                                                                                                                                                                                                                                                                                                                                                                                                                                                                                                                                                                                                                                                                                                                                                                                                                                                                                                                                                                                                                                                                                                                                                                                                                                                                                                                                                                                                                                                                                                                                                                                                                                                                                                                                                                                                                                                                                                                                                                                                                                                                                                                                                                                                                                                                                                                                                                                                                                                                                                                                                                                                                                                                                                                                                                                                                                                                                                                                                                                                                                                                                                                                                                                                                                                                                                                                                                                                                                                                                                                                                                                                                                                                                                                                                                                                                                                                                                                                                                                                                                                                                                                                                                                                                                                                                                                                                                                                                                                                                                                 | -7.04 | 65.00 | 1.50 | P | OUT |
| QL03558 | 1-Chloroheptafluorocyclopentene                                                                                                             | 1759-63-3   | FC1=C(Cl)C(F)C(F)C(F)C1(F)F                                                                                                                                                                                                                                                                                                                                                                                                                                                                                                                                                                                                                                                                                                                                                                                                                                                                                                                                                                                                                                                                                                                                                                                                                                                                                                                                                                                                                                                                                                                                                                                                                                                                                                                                                                                                                                                                                                                                                                                                                                                                                                                                                                                                                                                                                                                                                                                                                                                                                                                                                                                                                                                                                                                                                                                                                                                                                                                                                                                                                                                                                                                                                                                                                                                                                                                                                                                                                                                                                                                                                                                                                                                                                                                                                                                                                                                                                                                                                                                                                                                                                                                                                                                                                                                                                                                                                                                                                                                                                                                                                                                                                                                                                                                                                                                                                                                                                                                                                                                                                                                                                                                                                                                                                                                              | -5.66 | 61.54 | 0.96 | P | OUT |
| QL03559 | Perfluoro[4-isopropyltoluene]                                                                                                               | 20017-49-6  | FC1=C(F)C(=C)C(F)C=C1C(F)F)C(F)C(F)C(F)C(F)F                                                                                                                                                                                                                                                                                                                                                                                                                                                                                                                                                                                                                                                                                                                                                                                                                                                                                                                                                                                                                                                                                                                                                                                                                                                                                                                                                                                                                                                                                                                                                                                                                                                                                                                                                                                                                                                                                                                                                                                                                                                                                                                                                                                                                                                                                                                                                                                                                                                                                                                                                                                                                                                                                                                                                                                                                                                                                                                                                                                                                                                                                                                                                                                                                                                                                                                                                                                                                                                                                                                                                                                                                                                                                                                                                                                                                                                                                                                                                                                                                                                                                                                                                                                                                                                                                                                                                                                                                                                                                                                                                                                                                                                                                                                                                                                                                                                                                                                                                                                                                                                                                                                                                                                                                                             | -8.11 | 58.33 | 2.16 | P | IN  |
| QL03560 | Decafluorocyclohexene                                                                                                                       | 355-75-9    | FC1=C(C(F)C(F)C(F)C(F)C(F)C1(F)F                                                                                                                                                                                                                                                                                                                                                                                                                                                                                                                                                                                                                                                                                                                                                                                                                                                                                                                                                                                                                                                                                                                                                                                                                                                                                                                                                                                                                                                                                                                                                                                                                                                                                                                                                                                                                                                                                                                                                                                                                                                                                                                                                                                                                                                                                                                                                                                                                                                                                                                                                                                                                                                                                                                                                                                                                                                                                                                                                                                                                                                                                                                                                                                                                                                                                                                                                                                                                                                                                                                                                                                                                                                                                                                                                                                                                                                                                                                                                                                                                                                                                                                                                                                                                                                                                                                                                                                                                                                                                                                                                                                                                                                                                                                                                                                                                                                                                                                                                                                                                                                                                                                                                                                                                                                         | -5.70 | 62.50 | 0.95 | P | OUT |
| QL03561 | Octafluorocyclopentene                                                                                                                      | 559-40-0    | FC1=C(C(F)C(F)C(F)C(F)C1(F)F                                                                                                                                                                                                                                                                                                                                                                                                                                                                                                                                                                                                                                                                                                                                                                                                                                                                                                                                                                                                                                                                                                                                                                                                                                                                                                                                                                                                                                                                                                                                                                                                                                                                                                                                                                                                                                                                                                                                                                                                                                                                                                                                                                                                                                                                                                                                                                                                                                                                                                                                                                                                                                                                                                                                                                                                                                                                                                                                                                                                                                                                                                                                                                                                                                                                                                                                                                                                                                                                                                                                                                                                                                                                                                                                                                                                                                                                                                                                                                                                                                                                                                                                                                                                                                                                                                                                                                                                                                                                                                                                                                                                                                                                                                                                                                                                                                                                                                                                                                                                                                                                                                                                                                                                                                                             | -5.66 | 61.54 | 0.96 | P | OUT |
| QL03562 | Hexafluorocyclobutene                                                                                                                       | 697-11-0    | FC1=C(C(F)C(F)C1(F)F                                                                                                                                                                                                                                                                                                                                                                                                                                                                                                                                                                                                                                                                                                                                                                                                                                                                                                                                                                                                                                                                                                                                                                                                                                                                                                                                                                                                                                                                                                                                                                                                                                                                                                                                                                                                                                                                                                                                                                                                                                                                                                                                                                                                                                                                                                                                                                                                                                                                                                                                                                                                                                                                                                                                                                                                                                                                                                                                                                                                                                                                                                                                                                                                                                                                                                                                                                                                                                                                                                                                                                                                                                                                                                                                                                                                                                                                                                                                                                                                                                                                                                                                                                                                                                                                                                                                                                                                                                                                                                                                                                                                                                                                                                                                                                                                                                                                                                                                                                                                                                                                                                                                                                                                                                                                     | -5.59 | 60.00 | 0.97 | P | OUT |
| QL03563 | 1,2,3,4,5-Pentafluoro-6-(heptadecafluorooctyl)benzene                                                                                       | 54387-09-6  | FC1=C(C(F)C(F)C=C(C(F)C(F)C(F)C(F)C(F)C(F)C(F)C(F)C(F)F                                                                                                                                                                                                                                                                                                                                                                                                                                                                                                                                                                                                                                                                                                                                                                                                                                                                                                                                                                                                                                                                                                                                                                                                                                                                                                                                                                                                                                                                                                                                                                                                                                                                                                                                                                                                                                                                                                                                                                                                                                                                                                                                                                                                                                                                                                                                                                                                                                                                                                                                                                                                                                                                                                                                                                                                                                                                                                                                                                                                                                                                                                                                                                                                                                                                                                                                                                                                                                                                                                                                                                                                                                                                                                                                                                                                                                                                                                                                                                                                                                                                                                                                                                                                                                                                                                                                                                                                                                                                                                                                                                                                                                                                                                                                                                                                                                                                                                                                                                                                                                                                                                                                                                                                                                  | -9.51 | 61.11 | 2.73 | P | OUT |
| QL03564 | Perfluorotetralin                                                                                                                           | 2342-07-6   | FC1=C(C(F)C2=C(C(F)=C1F)C(F)C(F)C(F)C2(F)F                                                                                                                                                                                                                                                                                                                                                                                                                                                                                                                                                                                                                                                                                                                                                                                                                                                                                                                                                                                                                                                                                                                                                                                                                                                                                                                                                                                                                                                                                                                                                                                                                                                                                                                                                                                                                                                                                                                                                                                                                                                                                                                                                                                                                                                                                                                                                                                                                                                                                                                                                                                                                                                                                                                                                                                                                                                                                                                                                                                                                                                                                                                                                                                                                                                                                                                                                                                                                                                                                                                                                                                                                                                                                                                                                                                                                                                                                                                                                                                                                                                                                                                                                                                                                                                                                                                                                                                                                                                                                                                                                                                                                                                                                                                                                                                                                                                                                                                                                                                                                                                                                                                                                                                                                                               | -7.07 | 54.55 | 1.79 | P | IN  |
| QL03565 | Octafluoronaphthalene                                                                                                                       | 313-72-4    | FC1=C(F)C2=C(C(F)=C1F)C(F)=C(F)C(F)=C2F                                                                                                                                                                                                                                                                                                                                                                                                                                                                                                                                                                                                                                                                                                                                                                                                                                                                                                                                                                                                                                                                                                                                                                                                                                                                                                                                                                                                                                                                                                                                                                                                                                                                                                                                                                                                                                                                                                                                                                                                                                                                                                                                                                                                                                                                                                                                                                                                                                                                                                                                                                                                                                                                                                                                                                                                                                                                                                                                                                                                                                                                                                                                                                                                                                                                                                                                                                                                                                                                                                                                                                                                                                                                                                                                                                                                                                                                                                                                                                                                                                                                                                                                                                                                                                                                                                                                                                                                                                                                                                                                                                                                                                                                                                                                                                                                                                                                                                                                                                                                                                                                                                                                                                                                                                                  | -6.59 | 44.44 | 1.84 | P | IN  |
| QL03566 | Cyclopentene, 1,3,3,4,4,5,5-heptafluoro-                                                                                                    | 1892-03-1   | FC1=C(C(F)F)C(F)C(F)C1(F)F                                                                                                                                                                                                                                                                                                                                                                                                                                                                                                                                                                                                                                                                                                                                                                                                                                                                                                                                                                                                                                                                                                                                                                                                                                                                                                                                                                                                                                                                                                                                                                                                                                                                                                                                                                                                                                                                                                                                                                                                                                                                                                                                                                                                                                                                                                                                                                                                                                                                                                                                                                                                                                                                                                                                                                                                                                                                                                                                                                                                                                                                                                                                                                                                                                                                                                                                                                                                                                                                                                                                                                                                                                                                                                                                                                                                                                                                                                                                                                                                                                                                                                                                                                                                                                                                                                                                                                                                                                                                                                                                                                                                                                                                                                                                                                                                                                                                                                                                                                                                                                                                                                                                                                                                                                                               | -5.26 | 53.85 | 0.98 | P | OUT |
| QL03567 | Undecafluorocyclohexane                                                                                                                     | 308-24-7    | FC1C(F)C(F)C(F)C(F)C(F)C(F)C1(F)F                                                                                                                                                                                                                                                                                                                                                                                                                                                                                                                                                                                                                                                                                                                                                                                                                                                                                                                                                                                                                                                                                                                                                                                                                                                                                                                                                                                                                                                                                                                                                                                                                                                                                                                                                                                                                                                                                                                                                                                                                                                                                                                                                                                                                                                                                                                                                                                                                                                                                                                                                                                                                                                                                                                                                                                                                                                                                                                                                                                                                                                                                                                                                                                                                                                                                                                                                                                                                                                                                                                                                                                                                                                                                                                                                                                                                                                                                                                                                                                                                                                                                                                                                                                                                                                                                                                                                                                                                                                                                                                                                                                                                                                                                                                                                                                                                                                                                                                                                                                                                                                                                                                                                                                                                                                        | -5.58 | 61.11 | 0.94 | P | OUT |
| QL03568 | 1-Bromo-2,3,5,6-tetrafluoro-4-{1,1,2,3,3,3-hexafluoro-2-[1,1,2,3,3,3-hexafluoro-2-(heptafluoropropoxy)propoxy]propyl}benzene                | 60799-27-1  | Fc1c(F)c(F)c(F)c1Br(F)C(F)C(F)C(F)OC(F)C(F)OC(F)C(F)C(F)C(F)C(F)C(F)F                                                                                                                                                                                                                                                                                                                                                                                                                                                                                                                                                                                                                                                                                                                                                                                                                                                                                                                                                                                                                                                                                                                                                                                                                                                                                                                                                                                                                                                                                                                                                                                                                                                                                                                                                                                                                                                                                                                                                                                                                                                                                                                                                                                                                                                                                                                                                                                                                                                                                                                                                                                                                                                                                                                                                                                                                                                                                                                                                                                                                                                                                                                                                                                                                                                                                                                                                                                                                                                                                                                                                                                                                                                                                                                                                                                                                                                                                                                                                                                                                                                                                                                                                                                                                                                                                                                                                                                                                                                                                                                                                                                                                                                                                                                                                                                                                                                                                                                                                                                                                                                                                                                                                                                                                    | -9.52 | 58.54 | 2.80 | P | OUT |
| QL03569 | 2,3,3,3-Tetrafluoro-1-[2,3,5,6-tetrafluoro-4-{1,1,1,2,3,3,3-heptafluoropropan-2-yl}phenyl]-2-(trifluoromethyl)propan-1-one                  | 19547-30-9  | Fc1c(F)c(F)c(F)c1C(=O)C(F)C(F)F)C(F)C(F)C(F)C(F)F                                                                                                                                                                                                                                                                                                                                                                                                                                                                                                                                                                                                                                                                                                                                                                                                                                                                                                                                                                                                                                                                                                                                                                                                                                                                                                                                                                                                                                                                                                                                                                                                                                                                                                                                                                                                                                                                                                                                                                                                                                                                                                                                                                                                                                                                                                                                                                                                                                                                                                                                                                                                                                                                                                                                                                                                                                                                                                                                                                                                                                                                                                                                                                                                                                                                                                                                                                                                                                                                                                                                                                                                                                                                                                                                                                                                                                                                                                                                                                                                                                                                                                                                                                                                                                                                                                                                                                                                                                                                                                                                                                                                                                                                                                                                                                                                                                                                                                                                                                                                                                                                                                                                                                                                                                        | -8.39 | 56.25 | 2.35 | P | IN  |
| QL03570 | 1,2,4,5-Tetrafluoro-3-{1,1,1,2,3,3,3-heptafluoropropan-2-yl}-6-(trichloromethyl)benzene                                                     | 136264-73-8 | Fc1c(F)c(F)c(F)c1C(Cl)(Cl)C(F)C(F)C(F)F                                                                                                                                                                                                                                                                                                                                                                                                                                                                                                                                                                                                                                                                                                                                                                                                                                                                                                                                                                                                                                                                                                                                                                                                                                                                                                                                                                                                                                                                                                                                                                                                                                                                                                                                                                                                                                                                                                                                                                                                                                                                                                                                                                                                                                                                                                                                                                                                                                                                                                                                                                                                                                                                                                                                                                                                                                                                                                                                                                                                                                                                                                                                                                                                                                                                                                                                                                                                                                                                                                                                                                                                                                                                                                                                                                                                                                                                                                                                                                                                                                                                                                                                                                                                                                                                                                                                                                                                                                                                                                                                                                                                                                                                                                                                                                                                                                                                                                                                                                                                                                                                                                                                                                                                                                                  | -8.11 | 58.33 | 2.16 | P | IN  |
| QL03571 | 2,3,5,6-Tetrafluoro-4-{1,1,1,2,3,3,3-heptafluoropropan-2-yl}benzonitrile                                                                    | 20017-54-3  | Fc1c(F)c(F)c(F)c1C#N)C(F)C(F)F)C(F)F                                                                                                                                                                                                                                                                                                                                                                                                                                                                                                                                                                                                                                                                                                                                                                                                                                                                                                                                                                                                                                                                                                                                                                                                                                                                                                                                                                                                                                                                                                                                                                                                                                                                                                                                                                                                                                                                                                                                                                                                                                                                                                                                                                                                                                                                                                                                                                                                                                                                                                                                                                                                                                                                                                                                                                                                                                                                                                                                                                                                                                                                                                                                                                                                                                                                                                                                                                                                                                                                                                                                                                                                                                                                                                                                                                                                                                                                                                                                                                                                                                                                                                                                                                                                                                                                                                                                                                                                                                                                                                                                                                                                                                                                                                                                                                                                                                                                                                                                                                                                                                                                                                                                                                                                                                                     | -7.75 | 50.00 | 2.22 | P | IN  |
| QL03572 | 5,10,15,20-Tetrakis[2,3,5,6-tetrafluoro-4-{(3,3,4,4,5,5,6,6,7,7,8,8,9,9,10,10,11,11,12,12,12-henicosafuorododecyl)sulfanyl}phenyl]porphyrin | 956790-67-3 | Fc1c(F)c(F)c(F)c1SCCC(F)C(F)C(F)C(F)C(F)C(F)C(F)C(F)C(F)C(F)C(F)C(F)C(F)C(F)C(F)C(F)C(F)C(F)C(F)C(F)C(F)C(F)C(F)C(F)C(F)C(F)C(F)C(F)C(F)C(F)C(F)C(F)C(F)C(F)C(F)C(F)C(F)C(F)C(F)C(F)C(F)C(F)C(F)C(F)C(F)C(F)C(F)C(F)C(F)C(F)C(F)C(F)C(F)C(F)C(F)C(F)C(F)C(F)C(F)C(F)C(F)C(F)C(F)C(F)C(F)C(F)C(F)C(F)C(F)C(F)C(F)C(F)C(F)C(F)C(F)C(F)C(F)C(F)C(F)C(F)C(F)C(F)C(F)C(F)C(F)C(F)C(F)C(F)C(F)C(F)C(F)C(F)C(F)C(F)C(F)C(F)C(F)C(F)C(F)C(F)C(F)C(F)C(F)C(F)C(F)C(F)C(F)C(F)C(F)C(F)C(F)C(F)C(F)C(F)C(F)C(F)C(F)C(F)C(F)C(F)C(F)C(F)C(F)C(F)C(F)C(F)C(F)C(F)C(F)C(F)C(F)C(F)C(F)C(F)C(F)C(F)C(F)C(F)C(F)C(F)C(F)C(F)C(F)C(F)C(F)C(F)C(F)C(F)C(F)C(F)C(F)C(F)C(F)C(F)C(F)C(F)C(F)C(F)C(F)C(F)C(F)C(F)C(F)C(F)C(F)C(F)C(F)C(F)C(F)C(F)C(F)C(F)C(F)C(F)C(F)C(F)C(F)C(F)C(F)C(F)C(F)C(F)C(F)C(F)C(F)C(F)C(F)C(F)C(F)C(F)C(F)C(F)C(F)C(F)C(F)C(F)C(F)C(F)C(F)C(F)C(F)C(F)C(F)C(F)C(F)C(F)C(F)C(F)C(F)C(F)C(F)C(F)C(F)C(F)C(F)C(F)C(F)C(F)C(F)C(F)C(F)C(F)C(F)C(F)C(F)C(F)C(F)C(F)C(F)C(F)C(F)C(F)C(F)C(F)C(F)C(F)C(F)C(F)C(F)C(F)C(F)C(F)C(F)C(F)C(F)C(F)C(F)C(F)C(F)C(F)C(F)C(F)C(F)C(F)C(F)C(F)C(F)C(F)C(F)C(F)C(F)C(F)C(F)C(F)C(F)C(F)C(F)C(F)C(F)C(F)C(F)C(F)C(F)C(F)C(F)C(F)C(F)C(F)C(F)C(F)C(F)C(F)C(F)C(F)C(F)C(F)C(F)C(F)C(F)C(F)C(F)C(F)C(F)C(F)C(F)C(F)C(F)C(F)C(F)C(F)C(F)C(F)C(F)C(F)C(F)C(F)C(F)C(F)C(F)C(F)C(F)C(F)C(F)C(F)C(F)C(F)C(F)C(F)C(F)C(F)C(F)C(F)C(F)C(F)C(F)C(F)C(F)C(F)C(F)C(F)C(F)C(F)C(F)C(F)C(F)C(F)C(F)C(F)C(F)C(F)C(F)C(F)C(F)C(F)C(F)C(F)C(F)C(F)C(F)C(F)C(F)C(F)C(F)C(F)C(F)C(F)C(F)C(F)C(F)C(F)C(F)C(F)C(F)C(F)C(F)C(F)C(F)C(F)C(F)C(F)C(F)C(F)C(F)C(F)C(F)C(F)C(F)C(F)C(F)C(F)C(F)C(F)C(F)C(F)C(F)C(F)C(F)C(F)C(F)C(F)C(F)C(F)C(F)C(F)C(F)C(F)C(F)C(F)C(F)C(F)C(F)C(F)C(F)C(F)C(F)C(F)C(F)C(F)C(F)C(F)C(F)C(F)C(F)C(F)C(F)C(F)C(F)C(F)C(F)C(F)C(F)C(F)C(F)C(F)C(F)C(F)C(F)C(F)C(F)C(F)C(F)C(F)C(F)C(F)C(F)C(F)C(F)C(F)C(F)C(F)C(F)C(F)C(F)C(F)C(F)C(F)C(F)C(F)C(F)C(F)C(F)C(F)C(F)C(F)C(F)C(F)C(F)C(F)C(F)C(F)C(F)C(F)C(F)C(F)C(F)C(F)C(F)C(F)C(F)C(F)C(F)C(F)C(F)C(F)C(F)C(F)C(F)C(F)C(F)C(F)C(F)C(F)C(F)C(F)C(F)C(F)C(F)C(F)C(F)C(F)C(F)C(F)C(F)C(F)C(F)C(F)C(F)C(F)C(F)C(F)C(F)C(F)C(F)C(F)C(F)C(F)C(F)C(F)C(F)C(F)C(F)C(F)C(F)C(F)C(F)C(F)C(F)C(F)C(F)C(F)C(F)C(F)C(F)C(F)C(F)C(F)C(F)C(F)C(F)C(F)C(F)C(F)C(F)C(F)C(F)C(F)C(F)C(F)C(F)C(F)C(F)C(F)C(F)C(F)C(F)C(F)C(F)C(F)C(F)C(F)C(F)C(F)C(F)C(F)C(F)C(F)C(F)C(F)C(F)C(F)C(F)C(F)C(F)C(F)C(F)C(F)C(F)C(F)C(F)C(F)C(F)C(F)C(F)C(F)C(F)C(F)C(F)C(F)C(F)C(F)C(F)C(F)C(F)C(F)C(F)C(F)C(F)C(F)C(F)C(F)C(F)C(F)C(F)C(F)C(F)C(F)C(F)C(F)C(F)C(F)C(F)C(F)C(F)C(F)C(F)C(F)C(F)C(F)C(F)C(F)C(F)C(F)C(F)C(F)C(F)C(F)C(F)C(F)C(F)C(F)C(F)C(F)C(F)C(F)C(F)C(F)C(F)C(F)C(F)C(F)C(F)C(F)C(F)C(F)C(F)C(F)C(F)C(F)C(F)C(F)C(F)C(F)C(F)C(F)C(F)C(F)C(F)C(F)C(F)C(F)C(F)C(F)C(F)C(F)C(F)C(F)C(F)C(F)C(F)C(F)C(F)C(F)C(F)C(F)C(F)C(F)C(F)C(F)C(F)C(F)C(F)C(F)C(F)C(F)C(F)C(F)C(F)C(F)C(F)C(F)C(F)C(F)C(F)C(F)C(F)C(F)C(F)C(F)C(F)C(F)C(F)C(F)C(F)C(F)C(F)C(F)C(F)C(F)C(F)C(F)C(F)C(F)C(F)C(F)C(F)C(F)C(F)C(F)C(F)C(F)C(F)C(F)C(F)C(F)C(F)C(F)C(F)C(F)C(F)C(F)C(F)C(F)C(F)C(F)C(F)C(F)C(F)C(F)C(F)C(F)C(F)C(F)C(F)C(F)C(F)C(F)C(F)C(F)C(F)C(F)C(F)C(F)C(F)C(F)C(F)C(F)C(F)C(F)C(F)C(F)C(F)C(F)C(F)C(F)C(F)C(F)C(F)C(F)C(F)C(F)C(F)C(F)C(F)C(F)C(F)C(F)C(F)C(F)C(F)C(F)C(F)C(F)C(F)C(F)C(F)C(F)C(F)C(F)C(F)C(F)C(F)C(F)C(F)C(F)C(F)C(F)C(F)C(F)C(F)C(F)C(F)C(F)C(F)C(F)C(F)C(F)C(F)C(F)C(F)C(F)C(F)C(F)C(F)C(F)C(F)C(F)C(F)C(F)C(F)C(F)C(F)C(F)C(F)C(F)C(F)C(F)C(F)C(F)C(F)C(F)C(F)C(F)C(F)C(F)C(F)C(F)C(F)C(F)C(F)C(F)C(F)C(F)C(F)C(F)C(F)C(F)C(F)C(F)C(F)C(F)C(F)C(F)C(F)C(F)C(F)C(F)C(F)C(F)C(F)C(F)C(F)C(F)C(F)C(F)C(F)C(F)C(F)C(F)C(F)C(F)C(F)C(F)C(F)C(F)C(F)C(F)C(F)C(F)C(F)C(F)C(F)C(F)C(F)C(F)C(F)C(F)C(F)C(F)C(F)C(F)C(F)C(F)C(F)C(F)C(F)C(F)C(F)C(F)C(F)C(F)C(F)C(F)C(F)C(F)C(F)C(F)C(F)C(F)C(F)C(F)C(F)C(F)C(F)C(F)C(F)C(F)C(F)C(F)C(F)C(F)C(F)C(F)C(F)C(F)C(F)C(F)C(F)C(F)C(F)C(F)C(F)C(F)C(F)C(F)C(F)C(F)C(F)C(F)C(F)C(F)C(F)C(F)C(F)C(F)C(F)C(F)C(F)C(F)C(F)C(F)C(F)C(F)C(F)C(F)C(F)C(F)C(F)C(F)C(F)C(F)C(F)C(F)C(F)C(F)C(F)C(F)C(F)C(F)C(F)C(F)C(F)C(F)C(F)C(F)C(F)C(F)C(F)C(F)C(F)C(F)C(F)C(F)C(F)C(F)C(F)C(F)C(F)C(F)C(F)C(F)C(F)C(F)C(F)C(F)C(F)C(F)C(F)C(F)C(F)C(F)C(F)C(F)C(F)C(F)C(F)C(F)C(F)C(F)C(F)C(F)C(F)C(F)C(F)C(F)C(F)C(F)C(F)C(F)C(F)C(F)C(F)C(F)C(F)C(F)C(F)C(F)C(F)C(F)C(F)C(F)C(F)C(F)C(F)C(F)C(F)C(F)C(F)C(F)C(F)C(F)C(F)C(F)C(F)C(F)C(F)C(F)C(F)C(F)C(F)C(F)C(F)C(F)C(F)C(F)C(F)C(F)C(F)C(F)C(F)C(F)C(F)C(F)C(F)C(F)C(F)C(F)C(F)C(F)C(F)C(F)C(F)C(F)C(F)C(F)C(F)C(F)C(F)C(F)C(F)C(F)C(F)C(F)C(F)C(F)C(F)C(F)C(F)C(F)C(F)C(F)C(F)C(F)C(F)C(F)C(F)C(F)C(F)C(F)C(F)C(F)C(F)C(F)C(F)C(F)C(F)C(F)C(F)C(F)C(F)C(F)C(F)C(F)C(F)C(F)C(F)C(F)C(F)C(F)C(F)C(F)C(F)C(F)C(F)C(F)C(F)C(F)C(F)C(F)C(F)C(F)C(F)C(F)C(F)C(F)C(F)C(F)C(F)C(F)C(F)C(F)C(F)C(F)C(F)C(F)C(F)C(F)C(F)C(F)C(F)C(F)C(F)C(F)C(F)C(F)C(F)C(F)C(F)C(F)C(F)C(F)C(F)C(F)C(F)C(F)C(F)C(F)C(F)C(F)C(F)C(F)C(F)C(F)C(F)C(F)C(F)C(F)C(F)C(F)C(F)C(F)C(F)C(F)C(F)C(F)C(F)C(F)C(F)C(F)C(F)C(F)C(F)C(F)C(F)C(F)C(F)C(F)C(F)C(F)C(F)C(F)C(F)C(F)C(F)C(F)C(F)C(F)C(F)C(F)C(F)C(F)C(F)C(F)C(F)C(F)C(F)C(F)C(F)C(F)C(F)C(F)C(F)C(F)C(F)C(F)C(F)C(F)C(F)C(F)C(F)C(F)C(F)C(F)C(F)C(F)C(F)C(F)C(F)C(F)C(F)C(F)C(F)C(F)C(F)C(F)C(F)C(F)C(F)C(F)C(F)C(F)C(F)C(F)C(F)C(F)C(F)C(F)C(F)C(F)C(F)C(F)C(F)C(F)C(F)C(F)C(F)C(F)C(F)C(F)C(F)C(F)C(F)C(F)C(F)C(F)C(F) |       |       |      |   |     |

[illegible]





[illegible]







[illegible]

|         |                                                                                                                         |              |                                                                           |       |         |      |   |     |
|---------|-------------------------------------------------------------------------------------------------------------------------|--------------|---------------------------------------------------------------------------|-------|---------|------|---|-----|
| QL03978 | 4-(Undecafluoropentyl)cyclohexane-1-carboxylic acid                                                                     | 88951-26-2   | OC(=O)C1CCCC(C1)C(F)(F)C(F)(F)C(F)(F)C(F)(F)F                             | -7.31 | 30.56   | 2.53 | P | OUT |
| QL03979 | 4-(Heptafluoropropyl)cyclohexane-1-carboxylic acid                                                                      | 88951-29-5   | OC(=O)C1CCCC(C1)C(F)(F)C(F)(F)C(F)F                                       | -6.37 | 23.33   | 2.29 | P | OUT |
| QL03980 | 6-(Heptafluoropropyl)pyridine-3-carboxylic acid                                                                         | 1105981-44-9 | OC(=O)c1ccn(c1)C(F)(F)C(F)(F)C(F)F                                        | -6.78 | 30.43   | 2.29 | P | OUT |
| QL03981 | 4-[(2,2,3,3,4,4,5,5,6,6,7,7,8,8,8-Pentadecafluorooctyl)amino]benzoic acid                                               | 73782-58-8   | OC(=O)c1ccc(NCC(F)(F)C(F)(F)C(F)(F)C(F)(F)C(F)(F)C(F)(F)C(F)F)cc1         | -8.59 | 36.59   | 2.96 | P | OUT |
| QL03982 | 4-[(1,1,1,4,5,5,5-Heptafluoro-3-(1,1,2,3,3,3-heptafluoropropan-2-yl)-4-(trifluoromethyl)pent-2-en-2-yl]oxy]benzoic acid | 65439-50-1   | OC(=O)c1ccc(OC(=C(F)C(F)(F)C(F)(F)C(F)(F)C(F)(F)C(F)(F)C(F)(F)C(F)F)cc1   | -7.44 | 41.46   | 2.30 | P | IN  |
| QL03983 | 4-(Pentadecafluoroheptyloxy)benzoic acid                                                                                | 75895-47-5   | OC(=O)c1ccc(OC(F)(F)C(F)(F)C(F)(F)C(F)(F)C(F)(F)C(F)(F)C(F)F)cc1          | -8.72 | 40.54   | 2.91 | P | IN  |
| QL03984 | 4-[(2,2,3,3,4,4,5,5,6,6,7,7,8,8,8-Pentadecafluorooctyl)oxy]benzoic acid                                                 | 129560-87-8  | OC(=O)c1ccc(OC(F)(F)C(F)(F)C(F)(F)C(F)(F)C(F)(F)C(F)(F)C(F)(F)C(F)F)cc1   | -8.65 | 37.50   | 2.96 | P | OUT |
| QL03985 | 4-(2,2,3,3,4,4,4-Heptafluorobutoxy)benzoic acid                                                                         | 129590-24-5  | OC(=O)c1ccc(OC(F)(F)C(F)(F)C(F)F)cc1                                      | -6.98 | 25.00   | 2.53 | P | OUT |
| QL03986 | 4-(3,3,4,4,4,5,5,5,6,6,7,7,8,8,9,9,10,10,10-Heptadecafluorodecyl)oxy]benzoic acid                                       | 188034-84-6  | OC(=O)c1ccc(OC(C(F)(F)C(F)(F)C(F)(F)C(F)(F)C(F)(F)C(F)(F)C(F)(F)C(F)F)cc1 | -9.00 | 36.96   | 3.13 | P | OUT |
| QL03987 | 3-(1,1,1,2,3,3,3-Heptafluoropropan-2-yl)benzoic acid                                                                    | 2396-20-5    | OC(=O)c1ccccc1C(F)(F)C(F)(F)C(F)F                                         | -5.73 | 29.17   | 1.85 | P | OUT |
| QL03988 | 2-(Nonafluorobutyl)benzoic acid                                                                                         | 14670-68-9   | OC(=O)c1ccccc1C(F)(F)C(F)(F)C(F)F                                         | -6.65 | 33.33   | 2.16 | P | IN  |
| QL03989 | 2-(Heptafluoropropyl)pyridine-4-carboxylic acid                                                                         | 20897-65-8   | OC(=O)c1ccn(c1)C(F)(F)C(F)(F)C(F)F                                        | -6.50 | 30.43   | 2.16 | P | OUT |
| QL03990 | 3,4-Bis(2,2,3,3,4,4,4-heptafluorobutyl)-1H-pyrrole-2,5-dicarboxylic acid                                                | 83650-67-3   | OC(=O)c1Nc(C(=O)O)=O)cc(C(F)(F)C(F)(F)C(F)(F)C(F)(F)C(F)(F)F              | -7.37 | 35.00   | 2.44 | P | IN  |
| QL03991 | 4,4,5,5,6,6,6-Heptafluoro-3-(nitromethyl)hexanoic acid                                                                  | 7079-86-9    | OC(=O)CC(C[N+](=O)[O-])=O)C(F)(F)C(F)(F)C(F)F                             | -5.75 | 28.00   | 1.89 | P | OUT |
| QL03992 | 2-(2,2,3,3,4,4,4-Heptafluorobutyl)butanedioic acid                                                                      | 121223-84-5  | OC(=O)CC(C(F)(F)C(F)(F)C(F)(F)C(F)F)C(=O)O                                | -6.16 | 26.92   | 2.10 | P | OUT |
| QL03993 | 3-(Heptafluoropropyl)pentanedioic acid                                                                                  | 336-32-3     | OC(=O)CC(C(C(=O)O)=O)C(F)(F)C(F)(F)C(F)F                                  | -5.69 | 26.92   | 1.89 | P | OUT |
| QL03994 | 3,4,4,4-Tetrafluoro-3-(trifluoromethyl)butanoic acid                                                                    | 773869-22-0  | OC(=O)CC(F)(C(F)(F)C(F)F)C(F)F                                            | -5.40 | 41.18   | 1.38 | P | IN  |
| QL03995 | (Perfluoroheptyl)ethanoic acid                                                                                          | 45291-33-6   | OC(=O)CC(F)(F)C(F)(F)C(F)(F)C(F)(F)C(F)(F)C(F)(F)F                        | -8.34 | 51.72   | 2.45 | P | IN  |
| QL03996 | 52 Fluorotelomer carboxylic acid                                                                                        | 889944-77-8  | OC(=O)CC(F)(F)C(F)(F)C(F)(F)C(F)(F)C(F)(F)F                               | -7.51 | 47.83   | 2.17 | P | IN  |
| QL03997 | 3,3,4,4,5,5,5-Heptafluoropentanoic acid                                                                                 | 679-46-9     | OC(=O)CC(F)(F)C(F)(F)C(F)F                                                | -6.40 | 41.18   | 1.84 | P | IN  |
| QL03998 | 3,3,4,4-Tetrafluoro-4-[perfluoro-2-(fluorosulfonyl)ethoxy]butanoic acid                                                 | 363158-84-3  | OC(=O)CC(F)(F)C(F)OC(F)(F)S(F)(=O)=O                                      | -7.08 | 37.50   | 2.24 | P | IN  |
| QL03999 | 5,6,6,6-Tetrafluoro-4-oxo-5-(trifluoromethyl)hexanoic acid                                                              | 62656-74-0   | OC(=O)CCCC(=O)C(F)(C(F)F)C(F)F                                            | -5.80 | 31.82   | 1.81 | P | OUT |
| QL04000 | 5,5,6,6,7,7,7-heptafluoro-4,4-bis(trifluoromethyl)heptanoic Acid                                                        | 129991-14-6  | OC(=O)CCCC(C(F)(F)C(F)(F)C(F)(F)C(F)(F)C(F)(F)F                           | -7.08 | 44.83   | 2.05 | P | IN  |
| QL04001 | 4,4-bis(Trifluoromethyl)-4-fluoropropanoic acid                                                                         | 243139-62-0  | OC(=O)CCCC(F)(C(F)F)C(F)(F)F                                              | -5.61 | 35.00   | 1.64 | P | IN  |
| QL04002 | 5-Bromo-4,4,5,5-tetrafluoropentanoic acid                                                                               | 234443-22-2  | OC(=O)CCCC(F)(C(F)F)Br                                                    | -5.61 | 29.41   | 1.78 | P | OUT |
| QL04003 | 83 Fluorotelomer carboxylic acid                                                                                        | 34598-33-9   | OC(=O)CCCC(F)(F)C(F)(F)C(F)(F)C(F)(F)C(F)(F)C(F)(F)F                      | -8.69 | 48.57   | 2.69 | P | IN  |
| QL04004 | 3-Perfluoroheptylpropanoic acid                                                                                         | 812-70-4     | OC(=O)CCCC(F)(F)C(F)(F)C(F)(F)C(F)(F)C(F)(F)C(F)(F)F                      | -8.20 | 46.88   | 2.51 | P | IN  |
| QL04005 | 33 Fluorotelomer carboxylic acid                                                                                        | 356-02-5     | OC(=O)CCCC(F)(F)C(F)(F)C(F)F                                              | -6.25 | 35.00   | 1.93 | P | IN  |
| QL04006 | 4,4,5,5-Tetrafluoro-5-[(1,1,1,2,3,3,3-heptafluoropropan-2-yl)oxy]pentanoic acid                                         | 28793-36-4   | OC(=O)CCCC(F)(F)C(F)OC(F)(C(F)(F)C(F)(F)F                                 | -6.99 | 40.74   | 2.12 | P | IN  |
| QL04007 | 4,5,5,5-Tetrafluoro-4-(heptafluoropropoxy)pentanoic acid                                                                | 243128-40-7  | OC(=O)CCCC(F)OC(F)(C(F)(F)C(F)(F)C(F)(F)F                                 | -7.22 | 40.74</ |      |   |     |





|         |                                                                                                                                                         |              |                                                                                   |        |       |      |   |     |
|---------|---------------------------------------------------------------------------------------------------------------------------------------------------------|--------------|-----------------------------------------------------------------------------------|--------|-------|------|---|-----|
| QL04097 | 4-Bromo-2-[4,4,5,5,6,6,7,7,8,9,9-dodecafluoro-8-(trifluoromethyl)nonyl]phenol                                                                           | 610778-18-2  | Oc1ccc(Br)cc1CCCC(F)(F)(F)(F)(F)(F)(F)(F)(F)(F)(F)(F)                             | -8.08  | 37.21 | 2.71 | P | IN  |
| QL04098 | 2,2,3,3,4,4,5,5,6,6,7,7,8,8,8-Pentadecafluoroocetyl 4-hydroxybenzoate                                                                                   | 869308-35-0  | Oc1ccc(cc1C(=O)OCC(F)(F)(F)(F)(F)(F)(F)(F)(F)(F)(F)(F)                            | -8.65  | 37.50 | 2.96 | P | OUT |
| QL04099 | 4-(1,1,1,2,3,3-Heptafluoropropan-2-yl)phenol                                                                                                            | 71360-30-0   | Oc1ccc(cc1C(F)(C(F)(F)(F)(F)(F)(F)(F)(F)(F)(F)(F)                                 | -6.00  | 31.82 | 1.90 | P | OUT |
| QL04100 | 4-(Tridecafluorohexyl)phenol                                                                                                                            | 106877-15-0  | Oc1ccc(cc1C(F)(F)(F)(F)(F)(F)(F)(F)(F)(F)(F)(F)                                   | -7.94  | 41.94 | 2.52 | P | IN  |
| QL04101 | 3-Fluoro-4-((E)-[4'-(heptafluoropropyl)[1,1'-biphenyl]-4-yl]diazenyl)phenol                                                                             | 113448-90-1  | Oc1ccc(N=Nc2ccc(cc2)-c2ccc(cc2C(F)(F)(F)(F)(F)(F)(F)(F)c1                         | -8.13  | 18.18 | 3.23 | P | OUT |
| QL04102 | 4-[(2,2,3,3,4,4,5,5,6,6-Undecafluorohexyl)oxy]phenol                                                                                                    | 129560-96-9  | Oc1ccc(OCC(F)(F)(F)(F)(F)(F)(F)(F)(F)(F)(F)(F)c1                                  | -7.84  | 34.38 | 2.68 | P | OUT |
| QL04103 | 4-(2,2,3,3,4,4,4-Heptafluorobutoxy)phenol                                                                                                               | 129560-95-8  | Oc1ccc(OCC(F)(F)(F)(F)(F)(F)Fc1                                                   | -6.90  | 26.92 | 2.44 | P | OUT |
| QL04104 | 4-[(3,3,4,4,5,5,6,6-Nonafluorohexyl)oxy]phenol                                                                                                          | 129560-98-1  | Oc1ccc(OCCC(F)(F)(F)(F)(F)(F)(F)(F)c1                                             | -7.42  | 28.13 | 2.64 | P | OUT |
| QL04105 | 4-Hydroxyphenyl nonafluorobutane-1-sulfonate                                                                                                            | 146324-93-8  | Oc1ccc(OS(=O)(=O)C(F)(F)(F)(F)(F)(F)(F)c1                                         | -7.34  | 31.03 | 2.53 | P | OUT |
| QL04106 | 3-(6,6,7,7,8,8,9,9,10,10,11,11,11-Tridecafluoroundecyl)benzene-1,2-diol                                                                                 | 131545-70-5  | Oc1cccc(CCCCCC(F)(F)(F)(F)(F)(F)(F)(F)(F)(F)(F)c1O                                | -7.98  | 27.66 | 2.91 | P | OUT |
| QL04107 | 3-(12,12,13,13,14,14,15,15,15-Nonafluoropentadecyl)benzene-1,2-diol                                                                                     | 131545-71-6  | Oc1cccc(CCCCCCCCCC(F)(F)(F)(F)(F)(F)(F)(F)c1O                                     | -7.81  | 15.25 | 3.16 | P | OUT |
| QL04108 | 3-[(2,2,3,3,4,4,5,5,6,6,7,7,7-Tridecafluoroheptyl)amino]phenol                                                                                          | 1441382-30-4 | Oc1cccc(NCC(F)(F)(F)(F)(F)(F)(F)(F)(F)(F)(F)c1                                    | -8.01  | 36.11 | 2.71 | P | OUT |
| QL04109 | 3-(Heptadecafluoroocetyl)oxan-2-ol                                                                                                                      | 169213-95-0  | OC1OCCCC1C(F)(C(F)(F)(F)(F)(F)(F)(F)(F)(F)(F)(F)(F)                               | -8.27  | 41.46 | 2.68 | P | IN  |
| QL04110 | 3-(Tridecafluorohexyl)oxan-2-ol                                                                                                                         | 169213-94-9  | OC1OCCCC1C(F)(C(F)(F)(F)(F)(F)(F)(F)(F)(F)(F)                                     | -7.50  | 37.14 | 2.45 | P | IN  |
| QL04111 | 2-(3,3,4,4,5,5,6,6-Nonafluorohexyl)propane-1,3-diol                                                                                                     | 152220-76-3  | OCC(CO)CCC(F)(F)(F)(F)(F)(F)(F)(F)(F)                                             | -6.63  | 29.03 | 2.26 | P | OUT |
| QL04112 | 1H,1H,3H-Perfluoro[2,4-dimethylpentan-1-ol]                                                                                                             | 25065-50-3   | OCC(F)(C(F)(C(F)(F)(F)(F)(F)(F)(F)(F)(F)                                          | -6.50  | 50.00 | 1.65 | P | IN  |
| QL04113 | 1H,1H-Perfluoro[3,5,5-trimethylhexan-1-ol]                                                                                                              | 232267-34-4  | OCC(F)(C(F)(C(F)(F)(F)(F)(F)(F)(F)(F)(F)                                          | -7.26  | 56.67 | 1.82 | P | IN  |
| QL04114 | 2,2,3,4,4,5,5,6,6,7,8,8-Tridecafluoro-3,7-bis(trifluoromethyl)octan-1-ol                                                                                | 232587-50-7  | OCC(F)(F)(C(F)(C(F)(F)(F)(F)(F)(F)(F)(F)(F)                                       | -8.15  | 57.58 | 2.20 | P | IN  |
| QL04115 | 2,2,3,4,4,4-Hexafluoro-3-(trifluoromethyl)butan-1-ol                                                                                                    | 782390-93-6  | OCC(F)(F)(C(F)(C(F)(F)(F)(F)(F)(F)(F)(F)                                          | -6.02  | 50.00 | 1.43 | P | IN  |
| QL04116 | 1h,1h-perfluorooctadecan-1-ol                                                                                                                           | 242142-82-1  | OCC(F)(F)(C(F)(C(F)(F)(F)(F)(F)(F)(F)(F)(F)(F)(F)                                 | -10.71 | 61.40 | 3.27 | P | OUT |
| QL04117 | 1H,1H-Perfluorohexadecan-1-ol                                                                                                                           | 216144-94-4  | OCC(F)(F)(C(F)(C(F)(F)(F)(F)(F)(F)(F)(F)(F)(F)(F)                                 | -10.33 | 60.78 | 3.11 | P | OUT |
| QL04118 | 1H,1H-Perfluoro-1-tetradecanol                                                                                                                          | 15622-57-8   | OCC(F)(F)(C(F)(C(F)(F)(F)(F)(F)(F)(F)(F)                                          | -9.90  | 60.00 | 2.94 | P | OUT |
| QL04119 | 111 Fluorotelomer alcohol                                                                                                                               | 423-65-4     | OCC(F)(F)(C(F)(F)(C(F)(F)(C(F)(F)(C(F)(F)(C(F)(F)(F                               | -9.40  | 58.97 | 2.74 | P | OUT |
| QL04120 | 101 Fluorotelomer alcohol                                                                                                                               | 307-46-0     | OCC(F)(F)(C(F)(F)(C(F)(F)(C(F)(F)(C(F)(F)(C(F)(F)                                 | -9.24  | 58.33 | 2.68 | P | IN  |
| QL04121 | 91 Fluorotelomer alcohol                                                                                                                                | 307-37-9     | OCC(F)(F)(C(F)(F)(C(F)(F)(C(F)(F)(C(F)(F)(C(F)(F)                                 | -8.81  | 57.58 | 2.51 | P | IN  |
| QL04122 | 1H,1H,10H,10H-Perfluorododecan-1,10-diol                                                                                                                | 754-96-1     | OCC(F)(F)(C(F)(F)(C(F)(F)(C(F)(F)(C(F)(F)(C(F)(CO                                 | -8.08  | 47.06 | 2.45 | P | IN  |
| QL04123 | 81 Fluorotelomer alcohol                                                                                                                                | 423-56-3     | OCC(F)(F)(C(F)(F)(C(F)(F)(C(F)(F)(C(F)(F)(C(F)(F)                                 | -8.62  | 56.67 | 2.44 | P | IN  |
| QL04124 | 1H,1H,8H-Perfluoro-1-octanol                                                                                                                            | 10331-08-5   | OCC(F)(F)(C(F)(F)(C(F)(F)(C(F)(F)(C(F)(F)(C(F)(F)                                 | -7.83  | 51.85 | 2.21 | P | IN  |
| QL04125 | 1H,1H,8H,8H-Perfluorooctane-1,8-diol                                                                                                                    | 90177-96-1   | OCC(F)(F)(C(F)(F)(C(F)(F)(C(F)(F)(C(F)(F)(C(F)(CO                                 | -7.21  | 42.86 | 2.16 | P | IN  |
| QL04126 | 1H,1H,6H,6H-Perfluoro-1,6-hexanediol                                                                                                                    | 355-74-8     | OCC(F)(F)(C(F)(F)(C(F)(F)(C(F)(F)(C(F)(F)(C(F)(F)                                 | -6.07  | 36.36 | 1.81 | P | IN  |
| QL04127 | 1H,1H-Perfluoro-1-pentanol                                                                                                                              | 355-28-2     | OCC(F)(F)(C(F)(F)(C(F)(F)(F                                                       | -6.84  | 50.00 | 1.81 | P | IN  |
| QL04128 | Hexafluoroamylene glycol                                                                                                                                | 376-90-9     | OCC(F)(F)(C(F)(F)(C(F)(F)CO                                                       | -5.63  | 31.58 | 1.74 | P | OUT |
| QL04129 | Heptafluorobutanol                                                                                                                                      | 375-01-9     | OCC(F)(F)(C(F)(F)(C(F)(F)F                                                        | -5.89  | 46.67 | 1.46 | P | IN  |
| QL04130 | 21 Fluorotelomer alcohol                                                                                                                                | 422-05-9     | OCC(F)(F)(C(F)(F)F                                                                | -5.45  | 41.67 | 1.39 | P | IN  |
| QL04131 | 1H,1H,3H-Perfluorobutanol                                                                                                                               | NOCAS_870523 | OCC(F)(F)(C(F)(F)F                                                                | -5.58  | 40.00 | 1.49 | P | IN  |
| QL04132 | 2,2,3,3-Tetrafluoro-1-propanol                                                                                                                          | 76-37-9      | OCC(F)(F)(C(F)F                                                                   | -5.00  | 33.33 | 1.41 | P | IN  |
| QL04133 | 2,2,3-Trifluoro-3-(heptafluoropropoxy)propan-1-ol                                                                                                       | 73320-57-7   | OCC(F)(F)(C(F)OC(F)(F)(C(F)(F)(F)F                                                | -7.24  | 45.45 | 2.11 | P | IN  |
| QL04134 | 1h,1h-perfluoro-3,6-dioxadecan-1-ol                                                                                                                     | 152914-73-3  | OCC(F)(F)OC(F)(F)(C(F)(F)OC(F)(F)C(F)(F)(F)F                                      | -8.48  | 51.72 | 2.51 | P | IN  |
| QL04135 | 1h,1h-perfluoro-3,6,9-trioxadecan-1-ol                                                                                                                  | 317817-24-6  | OCC(F)(F)OC(F)(F)(C(F)(F)OC(F)(F)C(F)(F)C(F)(F)F                                  | -9.38  | 52.78 | 2.89 | P | OUT |
| QL04136 | 1H,1H,11H,11H-Perfluorotetraethylene glycol                                                                                                             | 330562-44-2  | OCC(F)(F)OC(F)(F)(C(F)(F)OC(F)(F)C(F)(F)CO                                        | -7.80  | 38.71 | 2.54 | P | IN  |
| QL04137 | Fluorinated triethylene glycol monomethyl ether                                                                                                         | 147492-57-7  | OCC(F)(F)OC(F)(F)(C(F)(F)OC(F)(F)C(F)(F)F                                         | -8.31  | 48.15 | 2.52 | P | IN  |
| QL04138 | 1H,1H-Nonafluoro-3,6-dioxahexan-1-ol                                                                                                                    | 330562-43-1  | OCC(F)(F)OC(F)(F)(C(F)(F)OC(F)F                                                   | -7.43  | 45.00 | 2.21 | P | IN  |
| QL04139 | 2,3,3,3-Tetrafluoro-2-(perfluoropentoxyl)propan-1-ol                                                                                                    | 78693-85-3   | OCC(F)(OC(F)(F)(C(F)(F)(C(F)(F)C(F)(F)C(F)F                                       | -7.95  | 53.57 | 2.22 | P | IN  |
| QL04140 | 2-(Perfluoropropoxy)-1H,1H-perfluoropropanol                                                                                                            | 26537-88-2   | OCC(F)(OC(F)(F)(C(F)(F)(F)(F)F                                                    | -6.99  | 50.00 | 1.87 | P | IN  |
| QL04141 | Perfluoro(2-(2-propoxypropoxy)-1H,1H-propan-1-ol)                                                                                                       | 14548-74-4   | OCC(F)(OC(F)(F)(C(F)(F)(C(F)(F)(F)(F)C(F)(F)F                                     | -8.36  | 53.13 | 2.42 | P | IN  |
| QL04142 | 2,3,3,3-Tetrafluoro-2-(1,1,2,3,3,3-hexafluoro-2-(1,1,2,3,3,3-hexafluoro-2-(heptafluoropropoxy)propoxy)propan-1-ol                                       | 14620-81-6   | OCC(F)(OC(F)(F)(C(F)(OC(F)(F)(C(F)(F)(C(F)(F)(F)(F)C(F)(F)C(F)(F)F                | -9.02  | 54.76 | 2.67 | P | IN  |
| QL04143 | 2,4,4,5,7,7,8,10,10,11,13,13,14,14,15,15-Heptadecafluoro-2,5,8,11-tetrakis(trifluoromethyl)-3,6,9,12-tetraoxapentadecan-1-ol                            | 141977-66-4  | OCC(F)(OC(F)(F)(C(F)(OC(F)(F)(C(F)(OC(F)(F)(C(F)(F)(F)(F)C(F)(F)C(F)(F)F          | -9.82  | 55.77 | 3.01 | P | OUT |
| QL04144 | 2,4,4,5,7,7,8,10,10,11,13,13,14,16,16,17,17,18,18,18-Icosafluoro-2,5,8,11,14-pentakis(trifluoromethyl)-3,6,9,12,15-pentaaoxaoctadecan-1-ol              | 27617-34-1   | OCC(F)(OC(F)(F)(C(F)(OC(F)(F)(C(F)(OC(F)(F)(C(F)(F)(C(F)(F)C(F)(F)C(F)(F)C(F)(F)F | -10.26 | 56.45 | 3.19 | P | OUT |
| QL04145 | 2,4,4,5,7,7,8,10,10,11,13,13,14,16,16,17,19,19,20,20,21,21,21-Tricosafluoro-2,5,8,11,14,17-hexakis(trifluoromethyl)-3,6,9,12,15,18-hexaoxaheicosan-1-ol | 167631-99-4  | OCC(F)(OC(F)(F)(C(F)(OC(F)(F)(C(F)(OC(F)(F)(C(F)(F)(C(F)(F)C(F)(F)C(F)(F)C(F)(F)F | -10.82 | 56.94 | 3.44 | P | OUT |
| QL04147 | 4,5,5,5-Tetrafluoro-2-iodo-4-(trifluoromethyl)pent-2-en-1-ol                                                                                            | 261760-25-2  | OCC(I)=CC(F)(F)(C(F)(F)F                                                          | -6.13  | 42.11 | 1.69 | P | IN  |
| QL04149 | 4,4,5,5,6,6,7,7,8,9,9,9-Tridecafluoro-2-iodonon-2-en-1-ol                                                                                               | 261761-01-7  | OCC(I)=CC(F)(F)(C(F)(F)(C(F)(F)(F)(F)C(F)(F)C(F)(F)F                              | -8.27  | 50.00 | 2.45 | P | IN  |
| QL04150 | 4,4,5,5,6,6,6-heptafluoro-2-iodohex-2-en-1-ol                                                                                                           | 92835-82-0   | OCC(I)=CC(F)(F)(C(F)(F)(F)F                                                       | -6.67  | 42.11 | 1.93 | P | IN  |
| QL04152 | 4,5,5,5-Tetrafluoro-2-iodo-4-(trifluoromethyl)pentan-1-ol                                                                                               | 114810-56-9  | OCC(I)CC(F)(C(F)(F)(F)F                                                           | -5.90  | 38.10 | 1.69 | P | IN  |
| QL04153 | 4,4,5,5,6,6,7,7,8,9,9,9-dodecafluoro-2-iodo-8-(trifluoromethyl)nonan-1-ol                                                                               | 16083-62-8   | OCC(I)CC(F)(F)(C(F)(F)(F)(F)(F)(F)(F)C(F)(F)F                                     | -8.12  | 48.48 | 2.43 | P | IN  |
| QL04154 | 4,4,5,5,6,6,7,7,8,8,9,9,10,11,11,11-Hexadecafluoro-2-iodo-10-(trifluoromethyl)undecan-1-ol                                                              | 65726-35-4   | OCC(I)CC(F)(F)(C(F)(F)(F)(F)(F)(F)(F)(F)(F)(F)C(F)(F)C(F)(F)F                     | -8.82  | 51.28 | 2.67 | P | IN  |





[illegible]





[illegible]

|         |                                                                             |             |                                                                                  |       |       |      |   |     |
|---------|-----------------------------------------------------------------------------|-------------|----------------------------------------------------------------------------------|-------|-------|------|---|-----|
| QL04393 | ether-substituted Perfluoroalkyl (linear) sulfonic acids, i, n=1            | 159381-10-9 | S(=O)(O)(=O)C(F)F)OC(F)F)C(F)F)C(F)F)F                                           | -6.87 | 50.00 | 1.82 | P | IN  |
| QL04394 | N-methyl perfluorohexane sulfonamido acetic acid, n=6                       |             | S(N(C)CC(O)=O)(=O)(=O)C(F)F)C(F)F)C(F)F)C(F)F)F                                  | -7.71 | 38.24 | 2.51 | P | IN  |
| QL04395 | N-methyl perfluoropentane sulfonamido acetic acid, n=5                      |             | S(N(C)CC(O)=O)(=O)(=O)C(F)F)C(F)F)C(F)F)F                                        | -7.43 | 35.48 | 2.45 | P | IN  |
| QL04396 | N-methyl perfluorobutane sulfonamido acetic acid, n=4                       |             | S(N(C)CC(O)=O)(=O)(=O)C(F)F)C(F)F)C(F)F)F                                        | -6.77 | 32.14 | 2.24 | P | OUT |
| QL04397 | N-methyl perfluoropropane sulfonamido acetic acid, n=3                      |             | S(N(C)CC(O)=O)(=O)(=O)C(F)F)C(F)F)C(F)F)F                                        | -6.40 | 28.00 | 2.18 | P | OUT |
| QL04398 | N-methyl perfluoroalkanesulfonamido quaternary ammonium, n=8                |             | S(N(C)CCC[N+](C)(C)C)(=O)(=O)C(F)F)C(F)F)C(F)F)C(F)F)C(F)F)C(F)F)F               | -8.21 | 30.91 | 2.94 | P | OUT |
| QL04399 | N-methyl perfluoroalkanesulfonamido quaternary ammonium, n=7                |             | S(N(C)CCC[N+](C)(C)C)(=O)(=O)C(F)F)C(F)F)C(F)F)C(F)F)C(F)F)F                     | -8.00 | 28.85 | 2.89 | P | OUT |
| QL04400 | N-methyl perfluoroalkanesulfonamido quaternary ammonium, n=6                |             | S(N(C)CCC[N+](C)(C)C)(=O)(=O)C(F)F)C(F)F)C(F)F)C(F)F)F                           | -7.53 | 26.53 | 2.74 | P | OUT |
| QL04401 | N-methyl perfluoroalkanesulfonamido quaternary ammonium, n=5                |             | S(N(C)CCC[N+](C)(C)C)(=O)(=O)C(F)F)C(F)F)C(F)F)F                                 | -7.28 | 23.91 | 2.70 | P | OUT |
| QL04402 | N-methyl perfluoroalkanesulfonamido quaternary ammonium, n=4                |             | S(N(C)CCC[N+](C)(C)C)(=O)(=O)C(F)F)C(F)F)C(F)F)F                                 | -6.72 | 20.93 | 2.52 | P | OUT |
| QL04403 | N-methyl perfluoroalkanesulfonamido quaternary ammonium, n=3                |             | S(N(C)CCC[N+](C)(C)C)(=O)(=O)C(F)F)C(F)F)F                                       | -6.37 | 17.50 | 2.45 | P | OUT |
| QL04404 | N-methyl perfluoroalkanesulfonamido quaternary ammonium, n=2                |             | S(N(C)CCC[N+](C)(C)C)(=O)(=O)C(F)F)F                                             | -5.67 | 13.51 | 2.23 | P | OUT |
| QL04405 | perfluoroalkanesulfonamido sulfonate betaine D, n=6                         |             | S(N(C)CCC[N+](CCCS(=O)(O)=O)(C)C)(=O)(=O)C(F)F)C(F)F)C(F)F)C(F)F)F               | -8.08 | 22.03 | 3.11 | P | OUT |
| QL04406 | perfluoroalkanesulfonamido sulfonate betaine D, n=5                         |             | S(N(C)CCC[N+](CCCS(=O)(O)=O)(C)C)(=O)(=O)C(F)F)C(F)F)C(F)F)F                     | -7.78 | 19.64 | 3.04 | P | OUT |
| QL04407 | perfluoroalkanesulfonamido sulfonate betaine D, n=4                         |             | S(N(C)CCC[N+](CCCS(=O)(O)=O)(C)C)(=O)(=O)C(F)F)C(F)F)C(F)F)F                     | -7.32 | 16.98 | 2.90 | P | OUT |
| QL04408 | perfluoroalkanesulfonamido sulfonate betaine D, n=3                         |             | S(N(C)CCC[N+](CCCS(=O)(O)=O)(C)C)(=O)(=O)C(F)F)C(F)F)F                           | -7.02 | 14.00 | 2.84 | P | OUT |
| QL04409 | perfluoroalkanesulfonamido quaternary ammonium dicarboxylate A, n=6         |             | S(N(C)CC(O)=O)CCC[N+](CC(O)CS(=O)(O)=O)(C)C)(=O)(=O)C(F)F)C(F)F)C(F)F)F          | -7.81 | 23.64 | 2.94 | P | OUT |
| QL04410 | perfluoroalkanesulfonamido quaternary ammonium dicarboxylate A, n=5         |             | S(N(C)CC(O)=O)CCC[N+](CC(O)=O)(C)C)(=O)(=O)C(F)F)C(F)F)C(F)F)F                   | -7.53 | 21.15 | 2.88 | P | OUT |
| QL04411 | perfluoroalkanesulfonamido quaternary ammonium dicarboxylate A, n=4         |             | S(N(C)CC(O)=O)CCC[N+](CC(O)=O)(C)C)(=O)(=O)C(F)F)C(F)F)C(F)F)F                   | -7.04 | 18.37 | 2.73 | P | OUT |
| QL04412 | perfluoroalkanesulfonamido quaternary ammonium dicarboxylate A, n=3         |             | S(N(C)CC(O)=O)CCC[N+](CC(O)=O)(C)C)(=O)(=O)C(F)F)C(F)F)F                         | -6.56 | 15.22 | 2.59 | P | OUT |
| QL04413 | perfluoroalkanesulfonamido quaternary ammonium sulfonate carboxylate B, n=6 |             | S(N(C)CC(O)=O)CCC[N+](CC(O)CS(=O)(O)=O)(C)C)(=O)(=O)C(F)F)C(F)F)C(F)F)F          | -7.98 | 20.63 | 3.10 | P | OUT |
| QL04414 | perfluoroalkanesulfonamido quaternary ammonium sulfonate carboxylate B, n=5 |             | S(N(C)CC(O)=O)CCC[N+](CC(O)CS(=O)(O)=O)(C)C)(=O)(=O)C(F)F)C(F)F)C(F)F)F          | -7.62 | 18.33 | 3.00 | P | OUT |
| QL04415 | perfluoroalkanesulfonamido quaternary ammonium sulfonate carboxylate B, n=4 |             | S(N(C)CC(O)=O)CCC[N+](CC(O)CS(=O)(O)=O)(C)C)(=O)(=O)C(F)F)C(F)F)C(F)F)F          | -7.20 | 15.79 | 2.87 | P | OUT |
| QL04416 | perfluoroalkanesulfonamido quaternary ammonium sulfonate carboxylate B, n=3 |             | S(N(C)CC(O)=O)CCC[N+](CC(O)CS(=O)(O)=O)(C)C)(=O)(=O)C(F)F)C(F)F)F                | -6.88 | 12.96 | 2.80 | P | OUT |
| QL04417 | perfluoroalkanesulfonamido quaternary ammonium sulfonate carboxylate A, n=6 |             | S(N(C)CC(O)=O)CCC[N+](CCCS(=O)(O)=O)(C)C)(=O)(=O)C(F)F)C(F)F)C(F)F)F             | -8.00 | 20.97 | 3.10 | P | OUT |
| QL04418 | perfluoroalkanesulfonamido quaternary ammonium sulfonate carboxylate A, n=5 |             | S(N(C)CC(O)=O)CCC[N+](CCCS(=O)(O)=O)(C)C)(=O)(=O)C(F)F)C(F)F)C(F)F)F             | -7.64 | 18.64 | 3.00 | P | OUT |
| QL04419 | perfluoroalkanesulfonamido quaternary ammonium sulfonate carboxylate A, n=4 |             | S(N(C)CC(O)=O)CCC[N+](CCCS(=O)(O)=O)(C)C)(=O)(=O)C(F)F)C(F)F)C(F)F)F             | -7.21 | 16.07 | 2.87 | P | OUT |
| QL04420 | perfluoroalkanesulfonamido quaternary ammonium sulfonate carboxylate A, n=3 |             | S(N(C)CC(O)=O)CCC[N+](CCCS(=O)(O)=O)(C)C)(=O)(=O)C(F)F)C(F)F)F                   | -6.93 | 13.21 | 2.82 | P | OUT |
| QL04421 | perfluoroalkanesulfonamido quaternary ammonium disulfonate B, n=6           |             | S(N(C)CC(O)CS(=O)(O)=O)CCC[N+](CC(O)CS(=O)(O)=O)(C)C)(=O)(=O)C(F)F)C(F)F)C(F)F)F | -7.81 | 18.31 | 3.09 | P | OUT |
| QL04422 | perfluoroalkanesulfonamido quaternary ammonium disulfonate B, n=5           |             | S(N(C)CC(O)CS(=O)(O)=O)CCC[N+](CC(O)CS(=O)(O)=O)(C)C)(=O)(=O)C(F)F)C(F)F)F       | -7.45 | 16.18 | 2.98 | P | OUT |
| QL04423 | perfluoroalkanesulfonamido quaternary ammonium disulfonate B, n=4           |             | S(N(C)CC(O)CS(=O)(O)=O)CCC[N+](CC(O)CS(=O)(O)=O)(C)C)(=O)(=O)C(F)F)C(F)F)F       | -7.06 | 13.85 | 2.86 | P | OUT |
| QL04424 | perfluoroalkanesulfonamido quaternary ammonium disulfonate B, n=3           |             | S(N(C)CC(O)CS(=O)(O)=O)CCC[N+](CC(O)CS(=O)(O)=O)(C)C)(=O)(=O)C(F)F)C(F)F)F       | -6.68 | 11.29 | 2.75 | P | OUT |
| QL04425 | perfluoroalkanesulfonamido quaternary ammonium disulfonate B, n=2           |             | S(N(C)CC(O)CS(=O)(O)=O)CCC[N+](CC(O)CS(=O)(O)=O)(C)C)(=O)(=O)C(F)F)F             | -6.63 | 8.47  | 2.80 | P | OUT |
| QL04426 | perfluoroalkanesulfonamido quaternary diol sulfonic acid, n=6               |             | S(N(C)CC(O)CS(O)(=O)=O)CCC[N+](CCO)(C)C)(=O)(=O)C(F)F)C(F)F)C(F)F)F              | -7.52 | 20.31 | 2.90 | P | OUT |
| QL04427 | perfluoroalkanesulfonamido quaternary diol sulfonic acid, n=5               |             | S(N(C)CC(O)CS(O)(=O)=O)CCC[N+](CCO)(C)C)(=O)(=O)C(F)F)C(F)F)C(F)F)F              | -7.24 | 18.03 | 2.83 | P | OUT |
| QL04428 | perfluoroalkanesulfonamido quaternary diol sulfonic acid, n=4               |             | S(N(C)CC(O)CS(O)(=O)=O)CCC[N+](CCO)(C)C)(=O)(=O)C(F)F)C(F)F)F                    | -6.81 | 15.52 | 2.70 | P | OUT |
| QL04429 | perfluoroalkanesulfonamido quaternary diol sulfonic acid, n=3               |             | S(N(C)CC(O)CS(O)(=O)=O)CCC[N+](CCO)(C)C)(=O)(=O)C(F)F)C(F)F)F                    | -6.38 | 12.73 | 2.58 | P | OUT |
| QL04430 | N-ethyl perfluorodecane sulfonamido acetic acid, n=10                       |             | S(N(C)CC(O)CS(O)=O)CCC[N+](CCO)(C)C)(=O)(=O)C(F)F)C(F)F)F                        | -8.93 | 42.86 | 2.95 | P | IN  |
| QL04431 | N-ethyl perfluorononane sulfonamido acetic acid, n=9                        |             | S(N(C)CC(O)CS(O)=O)CCC[N+](CCO)(C)C)(=O)(=O)C(F)F)C(F)F)F                        | -8.73 | 41.30 | 2.90 | P | IN  |
| QL04432 | N-ethyl perfluoropropane sulfonamido acetic acid, n=3                       |             | S(N(C)CC(O)CS(O)=O)CCC[N+](CCO)(C)C)(=O)(=O)C(F)F)C(F)F)F                        | -6.22 | 25.00 | 2.18 | P | OUT |
| QL04433 | N-ethyl perfluoroethane sulfonamido acetic acid, n=2                        |             | S(N(C)CC(O)CS(O)=O)CCC[N+](CCO)(C)C)(=O)(=O)C(F)F)C(F)F)F                        | -5.36 | 20.00 | 1.92 | P | OUT |
| QL04434 | perfluoroalkanesulfonamido betaine C, n=6                                   |             | S(N(C)CC(O)CS(O)=O)CCC[N+](CCO)(C)C)(=O)(=O)C(F)F)C(F)F)F                        | -8.02 | 22.41 | 3.07 | P | OUT |
| QL04435 | perfluoroalkanesulfonamido betaine C, n=5                                   |             | S(N(C)CC(O)CS(O)=O)CCC[N+](CCO)(C)C)(=O)(=O)C(F)F)C(F)F)F                        | -7.59 | 20.00 | 2.94 | P | OUT |
| QL04436 | perfluoroalkanesulfonamido quaternary ammonium carboxylic acid, n=6         |             | S(N(C)CC(O)CS(O)=O)CCC[N+](CCO)(C)C)(=O)(=O)C(F)F)C(F)F)F                        | -7.38 | 23.64 | 2.75 | P | OUT |

|         |                                                                           |                                                                                                  |       |       |      |   |     |
|---------|---------------------------------------------------------------------------|--------------------------------------------------------------------------------------------------|-------|-------|------|---|-----|
| QL04437 | perfluoroalkanesulfonamido quaternary ammonium carboxylic acid, n=5       | S(N(CCC(=O)O)CCC[N+](C)(C)C(=O))(=O)C(F)(F)C(F)(F)C(F)(F)C(F)(F)F                                | -7.12 | 21.15 | 2.69 | P | OUT |
| QL04438 | perfluoroalkanesulfonamido quaternary ammonium carboxylic acid, n=4       | S(N(CCC(=O)O)CCC[N+](C)(C)C(=O))(=O)C(F)(F)C(F)(F)C(F)(F)C(F)(F)F                                | -6.58 | 18.37 | 2.52 | P | OUT |
| QL04439 | perfluoroalkanesulfonamido quaternary ammonium carboxylic acid, n=3       | S(N(CCC(=O)O)CCC[N+](C)(C)C(=O))(=O)C(F)(F)C(F)(F)C(F)(F)F                                       | -6.20 | 15.22 | 2.43 | P | OUT |
| QL04440 | perfluoroalkanesulfonamido quaternary ammonium dicarboxylate B, n=6       | S(N(CCC(=O)O)CCC[N+](CC(O)=O)(C)C(=O))(=O)C(F)(F)C(F)(F)C(F)(F)C(F)(F)C(F)(F)F                   | -7.75 | 22.41 | 2.95 | P | OUT |
| QL04441 | perfluoroalkanesulfonamido quaternary ammonium dicarboxylate B, n=5       | S(N(CCC(=O)O)CCC[N+](CC(O)=O)(C)C(=O))(=O)C(F)(F)C(F)(F)C(F)(F)C(F)(F)F                          | -7.47 | 20.00 | 2.88 | P | OUT |
| QL04442 | perfluoroalkanesulfonamido quaternary ammonium dicarboxylate B, n=4       | S(N(CCC(=O)O)CCC[N+](CC(O)=O)(C)C(=O))(=O)C(F)(F)C(F)(F)C(F)(F)C(F)(F)F                          | -6.91 | 17.31 | 2.70 | P | OUT |
| QL04443 | perfluoroalkanesulfonamido quaternary ammonium dicarboxylate C, n=6       | S(N(CCC(=O)O)CCC[N+](CC(O)=O)(C)C(=O))(=O)C(F)(F)C(F)(F)C(F)(F)C(F)(F)C(F)(F)F                   | -7.94 | 21.31 | 3.06 | P | OUT |
| QL04444 | perfluoroalkanesulfonamido quaternary ammonium dicarboxylate C, n=5       | S(N(CCC(=O)O)CCC[N+](CC(O)=O)(C)C(=O))(=O)C(F)(F)C(F)(F)C(F)(F)C(F)(F)F                          | -7.45 | 18.97 | 2.90 | P | OUT |
| QL04445 | perfluoroalkanesulfonamido quaternary ammonium dicarboxylate C, n=4       | S(N(CCC(=O)O)CCC[N+](CC(O)=O)(C)C(=O))(=O)C(F)(F)C(F)(F)C(F)(F)C(F)(F)F                          | -7.14 | 16.36 | 2.83 | P | OUT |
| QL04446 | perfluoroalkanesulfonamido quaternary ammonium dicarboxylate C, n=3       | S(N(CCC(=O)O)CCC[N+](CC(O)=O)(C)C(=O))(=O)C(F)(F)C(F)(F)C(F)(F)C(F)(F)F                          | -6.62 | 13.46 | 2.67 | P | OUT |
| QL04447 | perfluoroalkanesulfonamido amine carboxylic acid B, n=8                   | S(N(CCC(=O)O)CCC[N+](CCCN(C)C(=O))(=O)C(F)(F)C(F)(F)C(F)(F)C(F)(F)C(F)(F)C(F)(F)F                | -8.18 | 29.82 | 2.95 | P | OUT |
| QL04448 | perfluoroheptanesulfonamido amine carboxylic acid B, n=7                  | S(N(CCC(=O)O)CCCN(C)C(=O))(=O)C(F)(F)C(F)(F)C(F)(F)C(F)(F)C(F)(F)C(F)(F)F                        | -7.95 | 27.78 | 2.90 | P | OUT |
| QL04449 | perfluorohexanesulfonamido amine carboxylic acid B, n=6                   | S(N(CCC(=O)O)CCCN(C)C(=O))(=O)C(F)(F)C(F)(F)C(F)(F)C(F)(F)C(F)(F)F                               | -7.50 | 25.49 | 2.75 | P | OUT |
| QL04450 | perfluoropentanesulfonamido amine carboxylic acid B, n=5                  | S(N(CCC(=O)O)CCCN(C)C(=O))(=O)C(F)(F)C(F)(F)C(F)(F)C(F)(F)F                                      | -7.23 | 22.92 | 2.70 | P | OUT |
| QL04451 | perfluorobutanesulfonamido amine carboxylic acid B, n=4                   | S(N(CCC(=O)O)CCCN(C)C(=O))(=O)C(F)(F)C(F)(F)C(F)(F)F                                             | -6.68 | 20.00 | 2.52 | P | OUT |
| QL04452 | perfluoropropanesulfonamido amine carboxylic acid B, n=3                  | S(N(CCC(=O)O)CCCN(C)C(=O))(=O)C(F)(F)C(F)(F)F                                                    | -6.31 | 16.67 | 2.44 | P | OUT |
| QL04453 | perfluorohexanesulfonamido amine sulfonic acid, n=6                       | S(N(CCCS(=O)(O)=O)C(CO)CCN(C)C(=O))(=O)C(F)(F)C(F)(F)C(F)(F)C(F)(F)C(F)(F)F                      | -7.25 | 22.03 | 2.73 | P | OUT |
| QL04454 | perfluoropentanesulfonamido amine sulfonic acid, n=5                      | S(N(CCCS(=O)(O)=O)C(CO)CCN(C)C(=O))(=O)C(F)(F)C(F)(F)C(F)(F)C(F)(F)F                             | -6.97 | 19.64 | 2.67 | P | OUT |
| QL04455 | perfluoroalkanesulfonamido quaternary ammonium disulfonate A, n=8         | S(N(CCCS(=O)(O)=O)CCC[N+](CCCS(=O)(O)=O)(C)C(=O))(=O)C(F)(F)C(F)(F)C(F)(F)C(F)(F)C(F)(F)C(F)(F)F | -8.40 | 22.67 | 3.24 | P | OUT |
| QL04456 | perfluoroalkanesulfonamido quaternary ammonium disulfonate A, n=7         | S(N(CCCS(=O)(O)=O)CCC[N+](CCCS(=O)(O)=O)(C)C(=O))(=O)C(F)(F)C(F)(F)C(F)(F)C(F)(F)C(F)(F)F        | -8.18 | 20.83 | 3.18 | P | OUT |
| QL04457 | perfluoroalkanesulfonamido quaternary ammonium disulfonate A, n=6         | S(N(CCCS(=O)(O)=O)CCC[N+](CCCS(=O)(O)=O)(C)C(=O))(=O)C(F)(F)C(F)(F)C(F)(F)C(F)(F)F               | -7.84 | 18.84 | 3.08 | P | OUT |
| QL04458 | perfluoroalkanesulfonamido quaternary ammonium disulfonate A, n=5         | S(N(CCCS(=O)(O)=O)CCC[N+](CCCS(=O)(O)=O)(C)C(=O))(=O)C(F)(F)C(F)(F)C(F)(F)F                      | -7.54 | 16.67 | 3.00 | P | OUT |
| QL04459 | perfluoroalkanesulfonamido quaternary ammonium disulfonate A, n=4         | S(N(CCCS(=O)(O)=O)CCC[N+](CCCS(=O)(O)=O)(C)C(=O))(=O)C(F)(F)C(F)(F)C(F)(F)F                      | -7.10 | 14.29 | 2.86 | P | OUT |
| QL04460 | perfluoroalkanesulfonamido quaternary ammonium triol sulfonic acid, n=3   | S(N(CCCS(=O)(O)=O)CCC[N+](CCCS(=O)(O)=O)(C)C(=O))(=O)C(F)(F)C(F)(F)C(F)(F)F                      | -6.73 | 11.67 | 2.76 | P | OUT |
| QL04461 | perfluoroalkanesulfonamido quaternary ammonium triol sulfonic acid, n=6   | S(N(CCCS(=O)(O)=O)C(CO)CC[N+](CC(CO)O)(C)C(=O))(=O)C(F)(F)C(F)(F)C(F)(F)C(F)(F)C(F)(F)F          | -7.67 | 18.31 | 3.02 | P | OUT |
| QL04462 | perfluoroalkanesulfonamido quaternary ammonium triol sulfonic acid, n=5   | S(N(CCCS(=O)(O)=O)C(CO)CC[N+](CC(CO)O)(C)C(=O))(=O)C(F)(F)C(F)(F)C(F)(F)C(F)(F)F                 | -7.33 | 16.18 | 2.92 | P | OUT |
| QL04463 | perfluoroalkanesulfonamido quaternary ammonium triol sulfonic acid, n=4   | S(N(CCCS(=O)(O)=O)C(CO)CC[N+](CC(CO)O)(C)C(=O))(=O)C(F)(F)C(F)(F)C(F)(F)F                        | -7.02 | 13.85 | 2.84 | P | OUT |
| QL04464 | perfluoroalkanesulfonamido quaternary ammonium triol sulfonic acid, n=3   | S(N(CCCS(=O)(O)=O)C(CO)CC[N+](CC(CO)O)(C)C(=O))(=O)C(F)(F)C(F)(F)F                               | -6.56 | 11.29 | 2.70 | P | OUT |
| QL04465 | perfluoroalkanesulfonamido quaternary ammonium triol sulfonic acid, n=2   | S(N(CCCS(=O)(O)=O)C(CO)CC[N+](CC(CO)O)(C)C(=O))(=O)C(F)(F)C(F)(F)F                               | -6.43 | 8.47  | 2.71 | P | OUT |
| QL04466 | perfluoroalkanesulfonamido quaternary ammonium alcohol sulfonic acid, n=8 | S(N(CCCS(=O)(O)=O)CCC[N+](CCO)(C)C(=O))(=O)C(F)(F)C(F)(F)C(F)(F)C(F)(F)C(F)(F)C(F)(F)F           | -8.17 | 24.64 | 3.08 | P | OUT |
| QL04467 | perfluoroalkanesulfonamido quaternary ammonium alcohol sulfonic acid, n=7 | S(N(CCCS(=O)(O)=O)CCC[N+](CCO)(C)C(=O))(=O)C(F)(F)C(F)(F)C(F)(F)C(F)(F)C(F)(F)F                  | -7.96 | 22.73 | 3.04 | P | OUT |
| QL04468 | perfluoroalkanesulfonamido quaternary ammonium alcohol sulfonic acid, n=6 | S(N(CCCS(=O)(O)=O)CCC[N+](CCO)(C)C(=O))(=O)C(F)(F)C(F)(F)C(F)(F)C(F)(F)F                         | -7.55 | 20.63 | 2.90 | P | OUT |
| QL04469 | perfluoroalkanesulfonamido quaternary ammonium alcohol sulfonic acid, n=5 | S(N(CCCS(=O)(O)=O)CCC[N+](CCO)(C)C(=O))(=O)C(F)(F)C(F)(F)C(F)(F)C(F)(F)F                         | -7.26 | 18.33 | 2.83 | P | OUT |
| QL04470 | perfluoroalkanesulfonamido quaternary ammonium alcohol sulfonic acid, n=4 | S(N(CCCS(=O)(O)=O)CCC[N+](CCO)(C)C(=O))(=O)C(F)(F)C(F)(F)C(F)(F)F                                | -6.83 | 15.79 | 2.70 | P | OUT |
| QL04471 | perfluoroalkanesulfonamido quaternary ammonium alcohol sulfonic acid, n=3 | S(N(CCCS(=O)(O)=O)CCC[N+](CCO)(C)C(=O))(=O)C(F)(F)C(F)(F)F                                       | -6.44 | 12.96 | 2.60 | P | OUT |
| QL04472 | perfluoroalkanesulfonamido quaternary ammonium alcohol sulfonic acid, n=2 | S(N(CCCS(=O)(O)=O)CCC[N+](CCO)(C)C(=O))(=O)C(F)(F)F                                              | -6.30 | 9.80  | 2.62 | P | OUT |
| QL04473 | perfluoroalkanesulfonamido sulfonate betaine E, n=6                       | S(N(CCO)CCC[N+](CC(O)CS(=O)O)(C)C(=O))(=O)C(F)(F)C(F)(F)C(F)(F)C(F)(F)F                          | -7.98 | 20.31 | 3.11 | P | OUT |
| QL04474 | perfluoroalkanesulfonamido sulfonate betaine E, n=5                       | S(N(CCO)CCC[N+](CC(O)CS(=O)O)(C)C(=O))(=O)C(F)(F)C(F)(F)C(F)(F)F                                 | -7.65 | 18.03 | 3.02 | P | OUT |
| QL04475 | perfluoroalkanesulfonamido sulfonate betaine E, n=4                       | S(N(CCO)CCC[N+](CC(O)CS(=O)O)(C)C(=O))(=O)C(F)(F)C(F)(F)F                                        | -7.20 | 15.52 | 2.88 | P | OUT |
| QL04476 | perfluoroalkanesulfonamido sulfonate betaine E, n=3                       | S(N(CCO)CCC[N+](CC(O)CS(=O)O)(C)C(=O))(=O)C(F)(F)F                                               | -6.90 | 12.73 | 2.82 | P | OUT |
| QL04477 | perfluoroalkanesulfonamido quaternary ammonium diol B, n=8                | S(N(CCO)CCC[N+](CCO)(C)C(=O))(=O)C(F)(F)C(F)(F)C(F)(F)C(F)(F)C(F)(F)C(F)(F)F                     | -8.39 | 26.98 | 3.12 | P | OUT |
| QL04478 | perfluoroalkanesulfonamido quaternary ammonium diol B, n=7                | S(N(CCO)CCC[N+](CCO)(C)C(=O))(=O)C(F)(F)C(F)(F)C(F)(F)C(F)(F)C(F)(F)F                            | -8.19 | 25.00 | 3.08 | P | OUT |

|         |                                                             |                                                                              |       |       |      |   |     |
|---------|-------------------------------------------------------------|------------------------------------------------------------------------------|-------|-------|------|---|-----|
| QL04479 | perfluoroalkanesulfonamido quaternary ammonium diol B, n=6  | S(N(CCO)CCC[N+](CCO)(C)C(=O)(=O)C(F)(F)C(F)(F)C(F)(F)C(F)(F)C(F)(F)F         | -7.77 | 22.81 | 2.95 | P | OUT |
| QL04480 | perfluoroalkanesulfonamido quaternary ammonium diol B, n=5  | S(N(CCO)CCC[N+](CCO)(C)C(=O)(=O)C(F)(F)C(F)(F)C(F)(F)C(F)(F)F                | -7.51 | 20.37 | 2.89 | P | OUT |
| QL04481 | perfluoroalkanesulfonamido quaternary ammonium diol B, n=4  | S(N(CCO)CCC[N+](CCO)(C)C(=O)(=O)C(F)(F)C(F)(F)C(F)(F)C(F)(F)F                | -7.01 | 17.65 | 2.74 | P | OUT |
| QL04482 | perfluoroalkanesulfonamido quaternary ammonium diol B, n=3  | S(N(CCO)CCC[N+](CCO)(C)C(=O)(=O)C(F)(F)C(F)(F)C(F)(F)F                       | -6.59 | 14.58 | 2.62 | P | OUT |
| QL04483 | perfluoroalkanesulfonamido quaternary ammonium diol B, n=2  | S(N(CCO)CCC[N+](CCO)(C)C(=O)(=O)C(F)(F)C(F)(F)F                              | -5.97 | 11.11 | 2.44 | P | OUT |
| QL04484 | perfluorohexanesulfonamido amine carboxylic acid A, n=6     | S(NC(C(=O)=O)CCN(C)C(=O)(=O)C(F)(F)C(F)(F)C(F)(F)C(F)(F)C(F)(F)F             | -7.67 | 28.89 | 2.74 | P | OUT |
| QL04485 | perfluoropentanesulfonamido amine carboxylic acid A, n=5    | S(NC(C(=O)=O)CCN(C)C(=O)(=O)C(F)(F)C(F)(F)C(F)(F)C(F)(F)F                    | -7.41 | 26.19 | 2.69 | P | OUT |
| QL04486 | perfluorobutanesulfonamido amine carboxylic acid A, n=4     | S(NC(C(=O)=O)CCN(C)C(=O)(=O)C(F)(F)C(F)(F)C(F)(F)F                           | -6.85 | 23.08 | 2.52 | P | OUT |
| QL04487 | perfluoroalkanesulfonamido quaternary ammonium triol, n=6   | S(NC(CO)CC[N+](CC(O)CO)(C)C(=O)(=O)C(F)(F)C(F)(F)C(F)(F)C(F)(F)C(F)(F)F      | -7.97 | 22.41 | 3.05 | P | OUT |
| QL04488 | perfluoroalkanesulfonamido quaternary ammonium triol, n=5   | S(NC(CO)CC[N+](CC(O)CO)(C)C(=O)(=O)C(F)(F)C(F)(F)C(F)(F)C(F)(F)F             | -7.59 | 20.00 | 2.94 | P | OUT |
| QL04489 | perfluoroalkanesulfonamido quaternary ammonium triol, n=4   | S(NC(CO)CC[N+](CC(O)CO)(C)C(=O)(=O)C(F)(F)C(F)(F)C(F)(F)C(F)(F)F             | -7.32 | 17.31 | 2.89 | P | OUT |
| QL04490 | perfluoroalkanesulfonamido quaternary ammonium triol, n=3   | S(NC(CO)CC[N+](CC(O)CO)(C)C(=O)(=O)C(F)(F)C(F)(F)C(F)(F)F                    | -6.81 | 14.29 | 2.73 | P | OUT |
| QL04491 | perfluoroalkanesulfonamido quaternary ammonium diol A, n=6  | S(NCC(O)C[N+](CCO)(C)C(=O)(=O)C(F)(F)C(F)(F)C(F)(F)C(F)(F)C(F)(F)F           | -7.93 | 25.49 | 2.95 | P | OUT |
| QL04492 | perfluoroalkanesulfonamido quaternary ammonium diol A, n=5  | S(NCC(O)C[N+](CCO)(C)C(=O)(=O)C(F)(F)C(F)(F)C(F)(F)C(F)(F)F                  | -7.61 | 22.92 | 2.87 | P | OUT |
| QL04493 | perfluoroalkanesulfonamido quaternary ammonium diol A, n=4  | S(NCC(O)C[N+](CCO)(C)C(=O)(=O)C(F)(F)C(F)(F)C(F)(F)C(F)(F)F                  | -7.10 | 20.00 | 2.71 | P | OUT |
| QL04494 | perfluoroalkanesulfonamido quaternary ammonium oxide, n=9   | S(NCCC[N+](([O-])(C)C(=O)(=O)C(F)(F)C(F)(F)C(F)(F)C(F)(F)C(F)(F)C(F)(F)F     | -8.83 | 36.54 | 3.07 | P | OUT |
| QL04495 | perfluoroalkanesulfonamido quaternary ammonium oxide, n=7   | S(NCCC[N+](([O-])(C)C(=O)(=O)C(F)(F)C(F)(F)C(F)(F)C(F)(F)C(F)(F)F            | -8.22 | 32.61 | 2.89 | P | OUT |
| QL04496 | perfluoroalkanesulfonamido quaternary ammonium oxide, n=6   | 30295-56-8 S(NCCC[N+](([O-])(C)C(=O)(=O)C(F)(F)C(F)(F)C(F)(F)C(F)(F)C(F)(F)F | -7.75 | 30.23 | 2.74 | P | OUT |
| QL04497 | perfluoroalkanesulfonamido quaternary ammonium oxide, n=5   | S(NCCC[N+](([O-])(C)C(=O)(=O)C(F)(F)C(F)(F)C(F)(F)C(F)(F)F                   | -7.50 | 27.50 | 2.70 | P | OUT |
| QL04498 | perfluoroalkanesulfonamido quaternary ammonium oxide, n=4   | S(NCCC[N+](([O-])(C)C(=O)(=O)C(F)(F)C(F)(F)C(F)(F)F                          | -6.93 | 24.32 | 2.52 | P | OUT |
| QL04499 | perfluoroalkanesulfonamido quaternary ammonium, n=3         | S(NCCC[N+](C)(C)C(=O)(=O)C(F)(F)C(F)(F)C(F)(F)F                              | -6.38 | 18.92 | 2.42 | P | OUT |
| QL04500 | perfluoroalkanesulfonamido betaine A, n=6                   | S(NCCC[N+](CC(O)=O)(C)C(=O)(=O)C(F)(F)C(F)(F)C(F)(F)C(F)(F)C(F)(F)F          | -7.99 | 26.53 | 2.95 | P | OUT |
| QL04501 | perfluoroalkanesulfonamido betaine A, n=5                   | S(NCCC[N+](CC(O)=O)(C)C(=O)(=O)C(F)(F)C(F)(F)C(F)(F)C(F)(F)F                 | -7.67 | 23.91 | 2.87 | P | OUT |
| QL04502 | perfluoroalkanesulfonamido betaine A, n=4                   | S(NCCC[N+](CC(O)=O)(C)C(=O)(=O)C(F)(F)C(F)(F)C(F)(F)F                        | -7.15 | 20.93 | 2.71 | P | OUT |
| QL04503 | perfluoroalkanesulfonamido betaine A, n=3                   | S(NCCC[N+](CC(O)=O)(C)C(=O)(=O)C(F)(F)C(F)(F)C(F)(F)F                        | -6.75 | 17.50 | 2.62 | P | OUT |
| QL04504 | perfluoroalkanesulfonamido sulfonate betaine B, n=9         | S(NCCC[N+](CC(O)CS(=O)(O)=O)(C)C(=O)(=O)C(F)(F)C(F)(F)C(F)(F)C(F)(F)C(F)(F)F | -9.06 | 28.79 | 3.38 | P | OUT |
| QL04505 | perfluoroalkanesulfonamido sulfonate betaine B, n=8         | S(NCCC[N+](CC(O)CS(=O)(O)=O)(C)C(=O)(=O)C(F)(F)C(F)(F)C(F)(F)C(F)(F)C(F)(F)F | -8.72 | 26.98 | 3.27 | P | OUT |
| QL04506 | perfluoroalkanesulfonamido sulfonate betaine B, n=7         | S(NCCC[N+](CC(O)CS(=O)(O)=O)(C)C(=O)(=O)C(F)(F)C(F)(F)C(F)(F)C(F)(F)C(F)(F)F | -8.47 | 25.00 | 3.21 | P | OUT |
| QL04507 | perfluoroalkanesulfonamido sulfonate betaine B, n=6         | S(NCCC[N+](CC(O)CS(=O)(O)=O)(C)C(=O)(=O)C(F)(F)C(F)(F)C(F)(F)C(F)(F)C(F)(F)F | -8.07 | 22.81 | 3.08 | P | OUT |
| QL04508 | perfluoroalkanesulfonamido sulfonate betaine B, n=5         | S(NCCC[N+](CC(O)CS(=O)(O)=O)(C)C(=O)(=O)C(F)(F)C(F)(F)C(F)(F)C(F)(F)F        | -7.77 | 20.37 | 3.01 | P | OUT |
| QL04509 | perfluoroalkanesulfonamido sulfonate betaine B, n=4         | S(NCCC[N+](CC(O)CS(=O)(O)=O)(C)C(=O)(=O)C(F)(F)C(F)(F)C(F)(F)F               | -7.30 | 17.65 | 2.87 | P | OUT |
| QL04510 | perfluoroalkanesulfonamido sulfonate betaine B, n=3         | S(NCCC[N+](CC(O)CS(=O)(O)=O)(C)C(=O)(=O)C(F)(F)C(F)(F)F                      | -7.06 | 14.58 | 2.84 | P | OUT |
| QL04511 | perfluoroalkanesulfonamido betaine B, n=6                   | S(NCCC[N+](CCC(O)=O)(C)C(=O)(=O)C(F)(F)C(F)(F)C(F)(F)C(F)(F)C(F)(F)F         | -8.13 | 25.00 | 3.05 | P | OUT |
| QL04512 | perfluoroalkanesulfonamido betaine B, n=5                   | S(NCCC[N+](CCC(O)=O)(C)C(=O)(=O)C(F)(F)C(F)(F)C(F)(F)C(F)(F)F                | -7.69 | 22.45 | 2.92 | P | OUT |
| QL04513 | perfluoroalkanesulfonamido betaine B, n=4                   | S(NCCC[N+](CCC(O)=O)(C)C(=O)(=O)C(F)(F)C(F)(F)C(F)(F)F                       | -7.35 | 19.57 | 2.84 | P | OUT |
| QL04514 | perfluoroalkanesulfonamido betaine B, n=3                   | S(NCCC[N+](CCC(O)=O)(C)C(=O)(=O)C(F)(F)C(F)(F)F                              | -6.81 | 16.28 | 2.68 | P | OUT |
| QL04515 | perfluoroalkanesulfonamido quaternary ammonium diol C, n=6  | S(NCCC[N+](CCC(O)CO)(C)C(=O)(=O)C(F)(F)C(F)(F)C(F)(F)C(F)(F)C(F)(F)F         | -8.10 | 22.81 | 3.10 | P | OUT |
| QL04516 | perfluoroalkanesulfonamido quaternary ammonium diol C, n=5  | S(NCCC[N+](CCC(O)CO)(C)C(=O)(=O)C(F)(F)C(F)(F)C(F)(F)C(F)(F)F                | -7.81 | 20.37 | 3.03 | P | OUT |
| QL04517 | perfluoroalkanesulfonamido quaternary ammonium diol C, n=4  | S(NCCC[N+](CCC(O)CO)(C)C(=O)(=O)C(F)(F)C(F)(F)C(F)(F)F                       | -7.34 | 17.65 | 2.89 | P | OUT |
| QL04518 | perfluoroalkanesulfonamido sulfonate betaine A, n=8         | S(NCCC[N+](CCCS(=O)(O)=O)(C)C(=O)(=O)C(F)(F)C(F)(F)C(F)(F)C(F)(F)C(F)(F)F    | -8.75 | 27.42 | 3.27 | P | OUT |
| QL04519 | perfluoroalkanesulfonamido sulfonate betaine A, n=7         | S(NCCC[N+](CCCS(=O)(O)=O)(C)C(=O)(=O)C(F)(F)C(F)(F)C(F)(F)C(F)(F)F           | -8.49 | 25.42 | 3.21 | P | OUT |
| QL04520 | perfluoroalkanesulfonamido sulfonate betaine A, n=6         | S(NCCC[N+](CCCS(=O)(O)=O)(C)C(=O)(=O)C(F)(F)C(F)(F)C(F)(F)C(F)(F)F           | -8.10 | 23.21 | 3.09 | P | OUT |
| QL04521 | perfluoroalkanesulfonamido sulfonate betaine A, n=5         | S(NCCC[N+](CCCS(=O)(O)=O)(C)C(=O)(=O)C(F)(F)C(F)(F)C(F)(F)C(F)(F)F           | -7.80 | 20.75 | 3.01 | P | OUT |
| QL04522 | perfluoroalkanesulfonamido sulfonate betaine A, n=4         | S(NCCC[N+](CCCS(=O)(O)=O)(C)C(=O)(=O)C(F)(F)C(F)(F)C(F)(F)F                  | -7.33 | 18.00 | 2.87 | P | OUT |
| QL04523 | perfluoroalkanesulfonamido sulfonate betaine A, n=3         | S(NCCC[N+](CCCS(=O)(O)=O)(C)C(=O)(=O)C(F)(F)C(F)(F)F                         | -7.09 | 14.89 | 2.85 | P | OUT |
| QL04524 | perfluoroalkanesulfonamido sulfonate betaine C, n=6         | S(NCCC[N+](CCCS(=O)(O)=O)(C)CCO(=O)(=O)C(F)(F)C(F)(F)C(F)(F)C(F)(F)F         | -8.00 | 21.67 | 3.08 | P | OUT |
| QL04525 | perfluoroalkanesulfonamido sulfonate betaine C, n=5         | S(NCCC[N+](CCCS(=O)(O)=O)(C)CCO(=O)(=O)C(F)(F)C(F)(F)C(F)(F)C(F)(F)F         | -7.70 | 19.30 | 3.01 | P | OUT |
| QL04526 | perfluoroalkanesulfonamido sulfonate betaine C, n=4         | S(NCCC[N+](CCCS(=O)(O)=O)(C)CCO(=O)(=O)C(F)(F)C(F)(F)C(F)(F)F                | -7.24 | 16.67 | 2.87 | P | OUT |
| QL04527 | perfluoroalkanesulfonamido quaternary ammonium alcohol, n=8 | S(NCCC[N+](CCO)(C)C(=O)(=O)C(F)(F)C(F)(F)C(F)(F)C(F)(F)C(F)(F)C(F)(F)F       | -8.58 | 30.36 | 3.12 | P | OUT |

|         |                                                             |                                                                         |       |       |      |   |     |
|---------|-------------------------------------------------------------|-------------------------------------------------------------------------|-------|-------|------|---|-----|
| QL04528 | perfluoroalkanesulfonamido quaternary ammonium alcohol, n=7 | S(NCCC[N+](CCO)(C)C)(=O)(=O)C(F)(F)C(F)(F)C(F)(F)C(F)(F)C(F)(F)C(F)(F)F | -8.39 | 28.30 | 3.09 | P | OUT |
| QL04529 | perfluoroalkanesulfonamido quaternary ammonium alcohol, n=6 | S(NCCC[N+](CCO)(C)C)(=O)(=O)C(F)(F)C(F)(F)C(F)(F)C(F)(F)C(F)(F)F        | -7.97 | 26.00 | 2.95 | P | OUT |
| QL04530 | perfluoroalkanesulfonamido quaternary ammonium alcohol, n=5 | S(NCCC[N+](CCO)(C)C)(=O)(=O)C(F)(F)C(F)(F)C(F)(F)C(F)(F)F               | -7.65 | 23.40 | 2.87 | P | OUT |
| QL04531 | perfluoroalkanesulfonamido quaternary ammonium alcohol, n=4 | S(NCCC[N+](CCO)(C)C)(=O)(=O)C(F)(F)C(F)(F)C(F)(F)F                      | -7.14 | 20.45 | 2.72 | P | OUT |
| QL04532 | perfluoroalkanesulfonamido quaternary ammonium alcohol, n=3 | S(NCCC[N+](CCO)(C)C)(=O)(=O)C(F)(F)C(F)(F)F                             | -6.75 | 17.07 | 2.63 | P | OUT |
| QL04533 | perfluoroalkanesulfonamido quaternary ammonium alcohol, n=2 | S(NCCC[N+](CCO)(C)C)(=O)(=O)C(F)(F)C(F)F                                | -6.12 | 13.16 | 2.45 | P | OUT |
| QL04534 | perfluoropropanesulfonamido amine, n =3                     | S(NCCCN(C)C)(=O)(=O)C(F)(F)C(F)(F)F                                     | -6.57 | 21.21 | 2.44 | P | OUT |
| QL04535 | perfluoropropanesulfonamido sulfonic acid, n=6              | S(NCCCS(=O)(O)=O)(=O)C(F)(F)C(F)(F)C(F)(F)C(F)(F)C(F)(F)F               | -7.98 | 34.21 | 2.74 | P | OUT |
| QL04536 | perfluoropropanesulfonamido sulfonic acid, n=5              | S(NCCCS(=O)(O)=O)(=O)C(F)(F)C(F)(F)C(F)(F)C(F)(F)F                      | -7.73 | 31.43 | 2.70 | P | OUT |
| QL04537 | perfluoropropanesulfonamido sulfonic acid, n=4              | S(NCCCS(=O)(O)=O)(=O)C(F)(F)C(F)(F)C(F)(F)F                             | -7.15 | 28.13 | 2.52 | P | OUT |
| QL04538 | perfluoropropanesulfonamido sulfonic acid, n=3              | S(NCCCS(=O)(O)=O)(=O)C(F)(F)C(F)(F)F                                    | -6.68 | 24.14 | 2.42 | P | OUT |
