# Supplementary material for: How the Structure of Per- and Polyfluoroalkyl Substances (PFAS) Influences Their Binding Potency to the Peroxisome Proliferator-Activated and Thyroid Hormone Receptors—An In Silico Screening Study
Source: MDPI journal article supplement (doi:10.3390/molecules28020479), 2023-01-04
Supplement: s1 [file s1]

## ***Supplementary Materials 1***

### **How the structure of Per- and Polyfluoroalkyl Substances (PFAS) influences their binding potency to the peroxisome proliferator-activated and thyroid hormone receptors – an in silico screening study.**

**Authors: Dominika Jurkiewicz<sup>1</sup>, Anita Sosnowska<sup>1\*</sup>, Natalia Buławska<sup>1</sup>, Maciej Stępnik<sup>1</sup>, Harrie Besselink<sup>2</sup>, Peter Behnisch<sup>2</sup>, Tomasz Puzyn<sup>1,3\*</sup>**

1. QSAR Lab, ul. Trzy Lipy 3, Gdańsk, Poland
2. BioDetection Systems B.V., Science Park 406, 1098XH, Amsterdam, the Netherlands
3. University of Gdansk, Faculty of Chemistry, Wita Stwosza 63, 80-308 Gdansk, Poland

\* Corresponding authors.

E-mail address: t.puzyn@qsarlab.com, a.sosnowska@qsarlab.com
