# Supplementary material for: How the Structure of Per- and Polyfluoroalkyl Substances (PFAS) Influences Their Binding Potency to the Peroxisome Proliferator-Activated and Thyroid Hormone Receptors—An In Silico Screening Study
Source: Molecules. 2023 Jan 4;28(2):479. doi: 10.3390/molecules28020479 (PMC9866891; doi:10.3390/molecules28020479)
Supplement: Supplementary file 1 [file molecules-28-00479-s001.zip]

Archive with 8 entries (8 files):
- Supplementary Materials 1.1 - Introduction.pdf
- Supplementary Materials 1.2 -Groups.pdf
- Supplementary Materials 1.3- PPAR_α.pdf
- Supplementary Materials 1.4 - PPAR_β.pdf
- Supplementary Materials 1.5 - PPAR_γ.pdf
- Supplementary Materials 1.6 - TR_α.pdf
- Supplementary Materials 1.7 - TR_β.pdf
- Supplementary Materials 2.pdf
